# Supplementary material
Source: PubMed Central journal article supplement (PMC1914131)
Supplement: plntphys_pp.107.098640_1.pdf [file plntphys_pp.107.098640_1.pdf]

Table S1. Quality-control processing of ESTs.

Numbers labeled in bold italics indicate dbEST from cultivars that did not meet the criteria listed in the Materials and Methods.

| plant                          | strain           | dbEST <sup>a</sup> | Used dbEST <sup>b</sup> | EST size <sup>c</sup> | Cluster# <sup>d</sup> | %Flowers or berries <sup>e</sup> |
|--------------------------------|------------------|--------------------|-------------------------|-----------------------|-----------------------|----------------------------------|
| <i>Arabidopsis thaliana</i>    | columbia         | 215633             | 111142                  | 440                   | 2751                  | 7.8                              |
| <i>Arabidopsis thaliana</i>    | wassilewskija    | 49667              | 49667                   | 470                   | 2522                  | 0.0                              |
| <i>Glycine max</i>             | williams         | 94752              | 91691                   | 444                   | 2504                  | 0.0                              |
| <i>Glycine max</i>             | williams 82      | 82674              | 80218                   | 492                   | 2873                  | 17.4                             |
| <i>Gossypium raimondii</i>     | no strain        | 63117              | 63117                   | <b>714</b>            | 2924                  | 0.0                              |
| <i>Hordeum vulgare</i>         | barke            | 114423             | 96462                   | 515                   | 2571                  | 3.9                              |
| <i>Hordeum vulgare</i>         | haruna nijo      | 86597              | 86597                   | 472                   | 2905                  | 0.0                              |
| <i>Hordeum vulgare</i>         | morex            | 52428              | 42588                   | <b>711</b>            | 2294                  | 0.0                              |
| <i>Ipomoea nil</i>             | tokyo-kokei      | 61869              | 61869                   | 601                   | <b>3926</b>           | <b>41.7</b>                      |
| <i>Lactuca sativa</i>          | salinas          | 80144              | 80144                   | 657                   | 3540                  | 0.0                              |
| <i>Lotus japonicus</i>         | gifu b-129       | 70082              | 48654                   | 446                   | 2388                  | 3.5                              |
| <i>Lotus japonicus</i>         | miyakojima mg-20 | 75268              | 75268                   | 410                   | 3023                  | <b>20.7</b>                      |
| <i>Malus x domestica</i>       | goldrush         | 91843              | 76574                   | 457                   | 3160                  | <b>28.9</b>                      |
| <i>Malus x domestica</i>       | royal gala       | 117790             | 117790                  | 467                   | 2799                  | 5.7                              |
| <i>Medicago truncatula</i>     | a17              | 71611              | 66752                   | 586                   | 3254                  | 6.6                              |
| <i>Oryza sativa (indica)</i>   | pa64s            | 50882              | 50882                   | 470                   | 2813                  | <b>86.3</b>                      |
| <i>Oryza sativa (japonica)</i> | nackdong         | 61830              | <b>28527</b>            | 460                   |                       | 18.6                             |
| <i>Oryza sativa (japonica)</i> | nipponbare       | 893777             | 893777                  | 423                   | 3183                  | 14.2                             |
| <i>Solanum lycopersicum</i>    | micro-tom        | 92074              | 92074                   | 541                   | 3737                  | 0.0                              |
| <i>Solanum lycopersicum</i>    | ta496            | 108421             | 89186                   | 522                   | 3179                  | 16.7                             |
| <i>Sorghum bicolor</i>         | btx623           | 160752             | 128043                  | 535                   | 2810                  | 0.0                              |
|                                | cabernet         |                    |                         |                       |                       |                                  |
| <i>Vitis vinifera</i>          | sauvignon        | 158890             | 134202                  | 582                   | 2920                  | <b>58.4</b>                      |
| <i>Vitis vinifera</i>          | chardonnay       | 56596              | <b>35660</b>            | 541                   | 2985                  | 5.1                              |
| <i>Zea mays</i>                | b73              | 645237             | 645237                  | 518                   | 2102                  | 0.0                              |
| <i>Zea mays</i>                | f2               | 87344              | 58150                   | 409                   | 2714                  | 0.0                              |
| <i>Zea mays</i>                | oh43             | 54168              | 54168                   | 457                   | 2836                  | 0.0                              |

<sup>a</sup>EST were download from NBCI 23/12/06 contained within 711 libraries. dbESTs are ESTs from the specific cultivar with at least 40,000 ESTs, that are more than 99bp and do not include; poly A, vector contamination or more than 10% Ns (Materials and Methods; step i, ii and iii).

<sup>b</sup>ESTs from dbEST column not including libraries that contain more than 1% ESTs that include more than one indel. Cultivars that do not include at least 40,000 ESTs after processing the libraries, are marked in bold italics and were not used (Materials and Methods; step iv).

<sup>c</sup> Average ESTs size in each plant group. Average ESTs size, marked in bold italics are more than 2 standard deviation from the average ESTs sizes (Materials and Methods; step v).

<sup>d</sup>Used ESTs were grouped into clusters. Cluster numbers, that are more than 2 standard deviation from the average cluster number, are marked in bold italic (Materials and Methods; step vi).

<sup>e</sup>ESTs from libraries that contain only flowers or berries were counted. Cultivars in which those ESTs are more than 20% from all the ESTs are marked in bold italics (Materials and Methods; step vii).
