# Supplementary material
Source: PubMed Central journal article supplement (PMC1914131)
Supplement: plntphys_pp.107.098640_2.pdf [file plntphys_pp.107.098640_2.pdf]

Table S2: List of all EST pairs from all plants analyzed. Selections of 20,000 EST were chosen in 6 random passes and were matched against each other. The alignment results for all 6 selections were parsed for AS pairs and are shown here.

*Arabidopsis columbia*    *Solanum lycopersicon*    *Zea mays* b73

| EST1     | EST2     | EST1     | EST2     | EST1     | EST2     |
|----------|----------|----------|----------|----------|----------|
| AA042242 | AV441150 | AI482640 | AW034545 | AI438574 | DN227861 |
| AA042567 | CK120349 | AI482668 | AW623874 | AI491564 | AI622387 |
| AA042578 | CK120349 | AI482728 | AW651493 | AI491564 | BG462595 |
| AA042660 | N37744   | AI482738 | AI489351 | AI491564 | BG841277 |
| AA042660 | N37748   | AI482870 | BG127682 | AI586416 | BG410433 |
| AA042759 | CK118403 | AI482878 | AW623874 | AI586416 | DY621607 |
| AA067387 | AV553264 | AI482878 | BG135416 | AI586429 | DR800317 |
| AA067452 | N37229   | AI482878 | BG643325 | AI586758 | EB158369 |
| AA394362 | T44955   | AI483033 | BG123331 | AI600308 | DN208190 |
| AA394421 | AV541595 | AI483071 | AW031792 | AI619382 | EB159057 |
| AA394468 | T13880   | AI483071 | AW622642 | AI619396 | DN204674 |
| AA395166 | AV440012 | AI483114 | AI489351 | AI621487 | CD484506 |
| AA395281 | AV540651 | AI483190 | AW030261 | AI621487 | DR965656 |
| AA395321 | AA728472 | AI483246 | AI485051 | AI621681 | DV518651 |
| AA404814 | AV530316 | AI483246 | AI489351 | AI622805 | CB605437 |
| AA404814 | AV531327 | AI483303 | BG135665 | AI622805 | CO52267  |
| AA404814 | AV535202 | AI483325 | BG643941 | AI622805 | DN224135 |
| AA404814 | AV537717 | AI483612 | AW217552 | AI622805 | DN224405 |
| AA404814 | AV538178 | AI483612 | BG128007 | AI622805 | DN234158 |
| AA404814 | AV539706 | AI483615 | AI486762 | AI622805 | DN234369 |
| AA404814 | AV539976 | AI483633 | AW650881 | AI629507 | DN215636 |
| AA404814 | AV555969 | AI483633 | BG131907 | AI861232 | DN217391 |
| AA650664 | CK120521 | AI483633 | BI933142 | AW06661  | DY531670 |
| AA650875 | N37229   | AI483682 | AI489981 | AW06689  | DT646091 |
| AA651530 | AA712496 | AI483706 | BI935838 | AW26739  | CB331336 |
| AA651530 | BE526819 | AI483805 | AI485987 | AW28242  | DN223082 |
| AA651530 | BU634883 | AI483837 | AI486854 | BE761727 | DR824802 |
| AA651530 | BU635211 | AI483837 | AI771695 | BG265234 | DV174421 |
| AA651530 | BU635304 | AI483837 | AI897184 | BG317198 | DV515249 |
| AA651530 | BU635337 | AI483856 | AW621240 | BG354496 | EE175940 |
| AA651530 | BU636429 | AI483867 | AI485787 | BG410407 | BG517620 |
| AA651530 | CA781791 | AI483889 | AI483681 | BG458261 | EB820490 |
| AA651530 | CK118900 | AI483889 | AI894523 | BG462616 | DR824802 |
| AA651530 | T20830   | AI483889 | AI896372 | BG517330 | AI966932 |
| AA651556 | W43181   | AI483889 | AI897280 | BG549524 | DV539563 |
| AA651576 | AA712447 | AI483889 | AI899269 | BG840673 | DY689130 |
| AA651576 | AA712496 | AI483975 | AI487773 | BG840696 | AI001321 |
| AA651576 | BE526819 | AI483998 | AI486854 | BG840696 | DR814955 |
| AA651576 | BU634883 | AI483998 | AI487123 | BG840696 | DY621668 |
| AA651576 | BU635211 | AI483998 | AI897184 | BG842060 | BM33917  |
| AA651576 | BU635304 | AI483998 | AI897379 | BG842679 | DN210284 |
| AA651576 | BU635787 | AI483998 | AI897854 | BG842811 | EE164445 |
| AA651576 | BU636429 | AI483998 | AI897932 | BG873871 | DN227742 |
| AA651576 | CK118900 | AI483998 | AI899010 | BG873871 | DT650905 |
| AA651576 | N65061   | AI483998 | AI899310 | BM07373  | DN232863 |
| AA651576 | T20830   | AI483998 | BF050996 | BM07497  | BM33993  |
| AA712277 | R29964   | AI483998 | BF051033 | BM07522  | BM34819  |

|          |          |          |          |         |          |
|----------|----------|----------|----------|---------|----------|
| AA712383 | T13880   | AI484006 | AI489351 | BM07550 | BM34915  |
| AA712465 | N65013   | AI484042 | AI487509 | BM07821 | DV529194 |
| AA712484 | AV519267 | AI484042 | AI490544 | BM07839 | AI967033 |
| AA712484 | BU636612 | AI484058 | BI933820 | BM07839 | CO53228  |
| AA712484 | CK120097 | AI484414 | AI487717 | BM07840 | EE185480 |
| AA712713 | CK120349 | AI484414 | AI488251 | BM07909 | BM34145  |
| AA712794 | AV552943 | AI484414 | AI490147 | BM08033 | EB400600 |
| AA712794 | AV554633 | AI484422 | AI485729 | BM08071 | DR826282 |
| AA712794 | AV554726 | AI484422 | AI487773 | BM08071 | DY689130 |
| AA712927 | BE038890 | AI484436 | AW032972 | BM08071 | EE295023 |
| AA713098 | AV546540 | AI484467 | AI485987 | BM08077 | DV165523 |
| AA713098 | AV558715 | AI484475 | AI486854 | BM26662 | BM34987  |
| AA713211 | AV536621 | AI484475 | AI487123 | BM26685 | DV502076 |
| AA720062 | AV441150 | AI484475 | AI897379 | BM26692 | BM26840  |
| AA721816 | BE039250 | AI484475 | AI897932 | BM26697 | BM34145  |
| AA721836 | AV562461 | AI484497 | AW217552 | BM26720 | BM33917  |
| AA728497 | AV440763 | AI484497 | BG128007 | BM26731 | BM33584  |
| AA728704 | CK120349 | AI484521 | AW621226 | BM26777 | BM33584  |
| AA728704 | CK120521 | AI484577 | AI483681 | BM26844 | AI857233 |
| AI100142 | AV540160 | AI484577 | AI894523 | BM26850 | CB605160 |
| AI100143 | AV563663 | AI484577 | AI897280 | BM26949 | DR972527 |
| AI100516 | CK119365 | AI484623 | AI485729 | BM33200 | BM26827  |
| AV439489 | T45536   | AI484712 | AI489351 | BM33242 | BM26827  |
| AV439628 | AV517907 | AI484746 | BE462186 | BM33242 | BM34042  |
| AV439628 | AV555544 | AI484755 | AI486041 | BM33242 | BM35030  |
| AV439628 | AV561861 | AI484813 | AI899269 | BM33250 | BM34987  |
| AV439733 | AA042608 | AI484825 | AI486854 | BM33271 | DN233532 |
| AV439783 | DR750712 | AI484825 | AI487123 | BM33282 | EC901467 |
| AV439792 | AV520531 | AI484825 | AI897379 | BM33309 | CD670250 |
| AV440613 | AV527466 | AI484825 | AI897932 | BM33334 | BM38053  |
| AV441791 | AV520352 | AI484825 | AI899310 | BM33334 | EC882847 |
| AV441846 | AV553390 | AI484867 | BI923180 | BM33334 | EB820490 |
| AV442403 | R65050   | AI484871 | AI895786 | BM33345 | BM34819  |
| AV442460 | BG459606 | AI484887 | AW217552 | BM33522 | BM26918  |
| AV442582 | AV536742 | AI484887 | BG128007 | BM33522 | BM33407  |
| AV517934 | AV518565 | AI484957 | AI894673 | BM33522 | BM33718  |
| AV517934 | AV518675 | AI485002 | AI483681 | BM33522 | CB351284 |
| AV517934 | AV519058 | AI485002 | AI894523 | BM33564 | BM26918  |
| AV517934 | AV525650 | AI485002 | AI896372 | BM33564 | BM33407  |
| AV517934 | AV534468 | AI485002 | AI897280 | BM33564 | BM33498  |
| AV517934 | AV536579 | AI485002 | AI899269 | BM33564 | BM33718  |
| AV517999 | CK120349 | AI485044 | AW217552 | BM33564 | BM34824  |
| AV517999 | CK120521 | AI485044 | BG128007 | BM33564 | BM35050  |
| AV518070 | T45536   | AI485204 | AW647983 | BM33564 | CB351284 |
| AV518124 | CK120303 | AI485240 | BI935441 | BM33587 | EC901467 |
| AV518376 | AV518146 | AI485305 | AI484458 | BM33607 | EC901467 |
| AV518376 | AV518176 | AI485305 | AI897864 | BM33630 | DN219882 |
| AV518376 | AV518248 | AI485326 | BG133871 | BM33684 | DN221030 |
| AV518376 | AV518565 | AI485342 | AI483901 | BM33684 | DN233972 |
| AV518376 | AV518675 | AI485342 | AI491098 | BM33684 | DT942363 |
| AV518376 | AV519058 | AI485342 | AI895852 | BM33704 | BM34819  |
| AV518376 | AV519426 | AI485342 | AI898021 | BM33716 | EB820490 |

|          |          |          |          |         |          |
|----------|----------|----------|----------|---------|----------|
| AV518376 | AV519791 | AI485342 | AW030989 | BM33731 | BM34819  |
| AV518376 | AV525650 | AI485342 | AW034342 | BM33786 | BM33917  |
| AV518376 | AV534468 | AI485342 | AW036578 | BM33788 | BM34145  |
| AV518376 | AV536579 | AI485342 | AW220716 | BM33852 | BM33847  |
| AV518381 | AV518006 | AI485342 | AW220933 | BM33868 | BM26827  |
| AV518381 | AV518176 | AI485342 | AW220981 | BM33910 | BM34145  |
| AV518381 | AV518259 | AI485342 | AW221193 | BM33919 | BM07475  |
| AV518381 | AV518343 | AI485342 | AW221387 | BM33920 | EC901467 |
| AV518381 | AV518565 | AI485342 | AW224549 | BM33968 | BM34819  |
| AV518381 | AV518597 | AI485342 | AW621817 | BM34030 | BM34915  |
| AV518381 | AV518675 | AI485342 | AW930308 | BM34036 | BM33917  |
| AV518381 | AV519058 | AI485342 | AW930398 | BM34043 | CB605160 |
| AV518381 | AV519267 | AI485342 | AW930761 | BM34048 | BM34819  |
| AV518381 | AV520926 | AI485342 | AW930820 | BM34051 | BM34145  |
| AV518381 | AV531257 | AI485342 | AW930840 | BM34111 | AI966932 |
| AV518381 | AV534468 | AI485342 | AW931021 | BM34115 | BM33917  |
| AV518381 | BU636612 | AI485342 | AW931753 | BM34145 | BM34145  |
| AV518381 | CK120097 | AI485342 | AW931959 | BM34150 | BM35041  |
| AV518445 | AV518006 | AI485342 | AW932039 | BM34160 | BM33584  |
| AV518445 | AV518123 | AI485342 | AW932095 | BM34727 | BM34145  |
| AV518445 | AV518259 | AI485342 | AW932821 | BM34811 | BM34819  |
| AV518445 | AV518343 | AI485342 | AW932843 | BM34854 | BM07563  |
| AV518445 | AV518565 | AI485342 | AW933408 | BM34854 | BM33326  |
| AV518445 | AV518597 | AI485342 | AW933980 | BM34854 | CO52240  |
| AV518445 | AV518675 | AI485342 | AW934027 | BM34854 | DR787304 |
| AV518445 | AV519093 | AI485342 | AW934120 | BM34855 | BG840410 |
| AV518445 | AV522425 | AI485342 | BE459069 | BM34881 | DV025780 |
| AV518445 | AV525650 | AI485342 | BE462135 | BM34881 | EB642484 |
| AV518445 | AV536579 | AI485342 | BG123877 | BM34890 | BM34145  |
| AV518445 | CK120097 | AI485342 | BG124517 | BM35000 | BM34819  |
| AV518507 | AV518123 | AI485342 | BG126543 | BM35004 | AI966981 |
| AV518507 | AV518343 | AI485342 | BG126801 | BM35016 | BM34145  |
| AV518507 | AV518597 | AI485342 | BG127871 | BM35020 | BM26827  |
| AV518507 | AV519093 | AI485342 | BG134307 | BM35022 | DY542318 |
| AV518507 | AV522425 | AI485342 | BG791297 | BM35128 | BM26677  |
| AV518507 | AV525650 | AI485342 | BI421664 | BM35128 | DV516018 |
| AV518507 | AV536579 | AI485342 | BI922748 | BM35139 | EC901467 |
| AV518507 | CK120097 | AI485342 | BI932633 | BM35152 | BQ619104 |
| AV518516 | AV518038 | AI485364 | AI486854 | BM35178 | DN229273 |
| AV518516 | AV518343 | AI485364 | AI487123 | BM37939 | CD527622 |
| AV518516 | AV518565 | AI485364 | AI897379 | BM37994 | BM26899  |
| AV518516 | AV518597 | AI485364 | AI897932 | BM38029 | BM07958  |
| AV518516 | AV518781 | AI485373 | AW737933 | BM38029 | BM33742  |
| AV518516 | AV519421 | AI485389 | AI899269 | BM38029 | CD670368 |
| AV518516 | AV530939 | AI485428 | AI487717 | BM38039 | DN215252 |
| AV518516 | AV534468 | AI485428 | AI488251 | BM38070 | BM07811  |
| AV518516 | BE038932 | AI485428 | AI490147 | BM38070 | CB604060 |
| AV518580 | AV518176 | AI485451 | AI771695 | BM38070 | CB616994 |
| AV518580 | AV518248 | AI485451 | AI899310 | BM38070 | CD001450 |
| AV518580 | AV519371 | AI485492 | BI423433 | BM38070 | CD527458 |
| AV518580 | AV519426 | AI485508 | AW737933 | BM38070 | CD527459 |
| AV518580 | AV519791 | AI485531 | AI485787 | BM38070 | DN213403 |

|          |          |          |          |          |          |
|----------|----------|----------|----------|----------|----------|
| AV518589 | AA713044 | AI485531 | AW621240 | BM38070  | DN217851 |
| AV518589 | AV518006 | AI485546 | BI922482 | BM38070  | DN221992 |
| AV518589 | AV518038 | AI485548 | AI489351 | BM38070  | DN231986 |
| AV518589 | AV518123 | AI485578 | AW622742 | BM38070  | DT938301 |
| AV518589 | AV518176 | AI485578 | AW648800 | BM38070  | DV026864 |
| AV518589 | AV518259 | AI485580 | AI484035 | BM38070  | EB401262 |
| AV518589 | AV518343 | AI485595 | AW622742 | BM38070  | EC887462 |
| AV518589 | AV518565 | AI485595 | AW648800 | BM38070  | EC892466 |
| AV518589 | AV518597 | AI485609 | AW622742 | BM38070  | EE183086 |
| AV518589 | AV518675 | AI485609 | AW648800 | BM38086  | BM34819  |
| AV518589 | AV518781 | AI485646 | AI487596 | BM38096  | EC901467 |
| AV518589 | AV519093 | AI485725 | BI926695 | BM38100  | BM34145  |
| AV518589 | AV519421 | AI485794 | BG132865 | BM38146  | BM34145  |
| AV518589 | AV522425 | AI485852 | AI771696 | BM38193  | EE034599 |
| AV518589 | AV525650 | AI485865 | BG135524 | BM38195  | BQ619134 |
| AV518589 | AV530939 | AI485921 | AW622742 | BM38195  | BQ619387 |
| AV518589 | AV534468 | AI485922 | AI484035 | BM38224  | DN205468 |
| AV518589 | AV536579 | AI485954 | AI486822 | BM38224  | DN213801 |
| AV518589 | BE038932 | AI486079 | AI487717 | BM38224  | DN229691 |
| AV518589 | CK120097 | AI486138 | AW032222 | BQ485524 | DV531582 |
| AV518843 | AV518038 | AI486138 | AW738555 | BQ485851 | BM33917  |
| AV518843 | AV518248 | AI486203 | BI933276 | BQ485851 | DY689130 |
| AV518843 | AV518343 | AI486293 | AW737933 | BQ528698 | EB642398 |
| AV518843 | AV518565 | AI486341 | AW621240 | BQ529024 | DR826282 |
| AV518843 | AV518597 | AI486355 | AW622742 | BQ529024 | EE295023 |
| AV518843 | AV518781 | AI486355 | AW648800 | BQ539372 | CB833632 |
| AV518843 | AV519421 | AI486416 | BI921540 | BQ539372 | CD058947 |
| AV518843 | AV519426 | AI486454 | AW621240 | BQ539372 | CO53458  |
| AV518843 | AV519791 | AI486485 | AW737933 | BQ539372 | DN211379 |
| AV518843 | AV530939 | AI486618 | BI935838 | BQ539372 | DN217851 |
| AV518843 | AV534468 | AI486656 | AW217552 | BQ539372 | DN221182 |
| AV518843 | BE038932 | AI486656 | BG128007 | BQ539372 | DR807603 |
| AV518972 | AV518006 | AI486690 | AI488251 | BQ539372 | DR816998 |
| AV518972 | AV518176 | AI486690 | AI490147 | BQ539372 | DT640376 |
| AV518972 | AV518259 | AI486726 | AI486762 | BQ539372 | DT648617 |
| AV518972 | AV518343 | AI486745 | AW737933 | BQ539372 | DV023831 |
| AV518972 | AV518565 | AI486767 | AW623185 | BQ539372 | DV514365 |
| AV518972 | AV518597 | AI486770 | AI489351 | BQ539372 | DV532004 |
| AV518972 | AV518675 | AI486777 | BG134468 | BQ539372 | EB166340 |
| AV518972 | AV519058 | AI486784 | AW030377 | BQ539372 | EB704390 |
| AV518972 | AV519267 | AI486786 | BF050216 | BQ539372 | EE289156 |
| AV518972 | AV520926 | AI486797 | BE450491 | BQ539523 | DN232445 |
| AV518972 | AV531257 | AI486826 | AI486885 | BQ577768 | DV513287 |
| AV518972 | AV534468 | AI486834 | AW621199 | BQ578092 | EE027046 |
| AV518972 | BU636612 | AI486843 | AI485787 | BQ619330 | BQ619262 |
| AV518972 | CK120097 | AI486892 | AI896372 | BQ619330 | EE155189 |
| AV519046 | AV518038 | AI486892 | AW033996 | BQ619561 | BQ619256 |
| AV519046 | AV518343 | AI486930 | BI928261 | CA452489 | CB331336 |
| AV519046 | AV518565 | AI486946 | AI487773 | CA829409 | DN217096 |
| AV519046 | AV518597 | AI487003 | AI488251 | CA829578 | EC887671 |
| AV519046 | AV518781 | AI487003 | AI490147 | CA998607 | AI622579 |
| AV519046 | AV519058 | AI487058 | AI487717 | CB330964 | EC900241 |

|          |          |          |          |          |          |
|----------|----------|----------|----------|----------|----------|
| AV519046 | AV519267 | AI487058 | AI488251 | CB331827 | EB814500 |
| AV519046 | AV519421 | AI487200 | AW737933 | CB334319 | CB885714 |
| AV519046 | AV520926 | AI487205 | AI486872 | CB350619 | BM34001  |
| AV519046 | AV530939 | AI487259 | AW032980 | CB350765 | AI649610 |
| AV519046 | AV531257 | AI487279 | AI485787 | CB350988 | BM34145  |
| AV519046 | AV534468 | AI487284 | AW033679 | CB351382 | DV511993 |
| AV519046 | BE038932 | AI487305 | AW030807 | CB351668 | CB885714 |
| AV519046 | BU636612 | AI487305 | BI923091 | CB351686 | CD527622 |
| AV519046 | CK120097 | AI487308 | AI488251 | CB351693 | CO52597  |
| AV519232 | CK120349 | AI487308 | AI490147 | CB380579 | DN210181 |
| AV519232 | CK120521 | AI487373 | AI896372 | CB380579 | DV507453 |
| AV519438 | CK120349 | AI487373 | AI899269 | CB380609 | DN211081 |
| AV519438 | CK120521 | AI487374 | AW030191 | CB381102 | EE289089 |
| AV519730 | T45536   | AI487383 | AW737933 | CB381146 | DR785260 |
| AV519999 | AV518565 | AI487435 | AW455268 | CB381311 | DN234298 |
| AV519999 | AV518781 | AI487435 | AW932184 | CB381581 | DY688044 |
| AV519999 | AV519421 | AI487510 | AW030377 | CB604154 | DR811054 |
| AV519999 | AV530939 | AI487611 | AI486854 | CB604446 | DN216490 |
| AV519999 | AV534468 | AI487611 | AI487123 | CB604565 | CO52101  |
| AV519999 | BE038932 | AI487611 | AI771695 | CB604675 | EB161625 |
| AV520020 | CK120349 | AI487611 | AI897379 | CB604689 | DV526034 |
| AV520020 | CK120521 | AI487611 | AI897932 | CB616881 | DV510166 |
| AV520083 | CK120349 | AI487611 | AI899310 | CB617272 | CB381403 |
| AV520083 | CK120521 | AI487694 | AW650737 | CB617272 | CB617063 |
| AV520148 | CK120349 | AI487694 | AW738676 | CB816609 | DR809937 |
| AV520148 | CK120521 | AI487694 | BF050658 | CB816609 | DV537324 |
| AV520180 | CK118425 | AI487694 | BG125621 | CB816609 | EB673376 |
| AV520218 | CK120349 | AI487694 | BI421515 | CB816609 | EE047101 |
| AV520315 | AV519515 | AI487696 | AW033679 | CB833475 | EC873405 |
| AV520349 | CK120349 | AI487733 | AW033288 | CB833969 | DV522794 |
| AV520362 | CK120349 | AI487776 | AW621199 | CB885272 | DN215678 |
| AV520521 | CK120521 | AI487940 | AI487773 | CB885272 | DN225896 |
| AV520530 | CK121367 | AI487983 | AI898456 | CB885951 | EE031426 |
| AV520602 | CK121367 | AI487983 | BG132865 | CB886027 | DV514906 |
| AV520712 | AV520117 | AI488054 | BG713789 | CD001079 | EB701773 |
| AV520712 | AV520600 | AI488223 | AI895786 | CD001155 | CB885714 |
| AV520712 | AV521381 | AI488223 | AI895918 | CD001242 | CF648029 |
| AV520712 | AV526278 | AI488274 | AI488073 | CD001336 | CD484621 |
| AV520712 | AV533516 | AI488289 | AI489351 | CD058562 | DV537875 |
| AV520712 | AV549734 | AI488292 | AI486469 | CD058563 | DV537875 |
| AV520712 | AV564945 | AI488329 | AI487717 | CD484627 | CB331327 |
| AV520712 | BE038575 | AI488329 | AI488251 | CD485071 | DR958542 |
| AV520712 | BE038876 | AI488329 | AI490147 | CD527718 | DY234655 |
| AV520712 | BU635041 | AI488418 | AW621240 | CD568350 | DN217096 |
| AV520712 | BU635617 | AI488420 | AI487717 | CD573052 | DN223749 |
| AV520712 | BU636611 | AI488420 | AI488251 | CD573053 | DN223749 |
| AV520712 | CA963938 | AI488422 | AI485787 | CD651193 | AI622579 |
| AV520712 | CK117910 | AI488460 | AI488251 | CD651314 | DY689421 |
| AV520712 | CK119254 | AI488464 | AI488251 | CD662078 | DY689130 |
| AV520712 | CK119706 | AI488464 | AI490147 | CF243984 | DV025611 |
| AV520737 | AV518006 | AI488476 | AI487717 | CF244485 | DV168209 |
| AV520737 | AV518176 | AI488476 | AI488251 | CF244759 | DY623754 |

|          |          |          |          |          |          |
|----------|----------|----------|----------|----------|----------|
| AV520737 | AV518259 | AI488535 | AW932660 | CF646012 | DT940042 |
| AV520737 | AV518343 | AI488660 | BI922990 | CF646579 | EB638916 |
| AV520737 | AV518565 | AI488692 | AI486885 | CF646589 | DV163393 |
| AV520737 | AV518597 | AI488713 | AI486854 | CF648082 | EB822042 |
| AV520737 | AV518675 | AI488713 | AI771695 | CF648711 | EE037861 |
| AV520737 | AV518781 | AI488713 | AI897184 | CF649013 | CB331540 |
| AV520737 | AV519421 | AI488729 | AI485787 | CF649410 | CO53218  |
| AV520737 | AV519975 | AI488729 | AW621199 | CF649769 | CO52688  |
| AV520737 | AV530939 | AI488773 | AI896372 | CF649769 | EB814486 |
| AV520737 | AV534468 | AI488773 | AI899269 | CF649944 | CO52323  |
| AV520737 | BE038932 | AI488788 | AI488251 | CF650255 | DV528330 |
| AV520756 | CK120349 | AI488789 | AI487717 | CF650939 | DR811203 |
| AV520894 | CK120349 | AI488789 | AI488251 | CK144658 | EE288797 |
| AV520894 | CK120521 | AI488789 | AI490147 | CK145285 | DR965011 |
| AV521193 | CK120521 | AI488845 | BF114095 | CK145285 | DT650803 |
| AV521206 | AV522880 | AI488875 | AI488251 | CK145303 | DR830344 |
| AV521215 | CK119737 | AI488875 | AI490147 | CO51789  | DV536434 |
| AV521249 | BE038025 | AI488876 | AI487596 | CO51841  | DV535278 |
| AV521357 | CK120349 | AI488903 | AW621199 | CO51854  | DR800020 |
| AV521357 | CK120521 | AI488959 | AI899269 | CO51866  | DV516592 |
| AV521358 | CK120349 | AI488983 | AI488251 | CO51886  | DV528500 |
| AV521358 | CK120521 | AI489021 | AI487773 | CO51937  | EE029515 |
| AV521493 | CK120349 | AI489034 | AI486468 | CO51986  | DT646430 |
| AV521495 | CK120521 | AI489104 | BI423089 | CO52144  | EB405603 |
| AV521551 | CK121367 | AI489112 | AW030191 | CO52165  | DV527875 |
| AV522180 | AV557100 | AI489123 | AI771528 | CO52197  | DR787028 |
| AV522264 | CK120521 | AI489159 | AW621240 | CO52199  | EE011825 |
| AV522476 | AV440813 | AI489163 | AI488251 | CO52235  | DN222023 |
| AV522525 | CK120349 | AI489163 | AI490147 | CO52248  | DR825671 |
| AV522525 | CK120521 | AI489183 | AI486063 | CO52300  | EE027360 |
| AV522600 | CK120521 | AI489183 | AI486469 | CO52300  | EE173971 |
| AV522921 | AV547507 | AI489195 | BE458844 | CO52472  | DV163393 |
| AV522941 | AV524353 | AI489306 | AI489351 | CO52498  | CO52214  |
| AV523394 | AV523105 | AI489347 | AW621226 | CO52617  | DR830712 |
| AV523464 | AV522820 | AI489402 | AI896372 | CO52681  | DR786001 |
| AV523845 | AV521206 | AI489402 | AI899269 | CO52689  | EC875510 |
| AV524188 | N96829   | AI489402 | AW033996 | CO52709  | DY540580 |
| AV524460 | Z17980   | AI489428 | AW624908 | CO52723  | DR805113 |
| AV524918 | BE524799 | AI489428 | AW932854 | CO52729  | DY533156 |
| AV525057 | CK120349 | AI489488 | AI488251 | CO52741  | EB401814 |
| AV525502 | H36999   | AI489488 | AI490147 | CO52752  | EB706345 |
| AV525954 | BU634890 | AI489541 | AI490147 | CO52776  | DV024288 |
| AV526085 | CK120349 | AI489566 | BE450829 | CO52776  | DV534765 |
| AV526166 | BU634890 | AI489596 | BG127919 | CO52776  | EB822239 |
| AV526172 | BE524799 | AI489609 | AI483439 | CO52776  | EE187389 |
| AV526360 | CK119737 | AI489633 | AW030377 | CO52802  | DV518840 |
| AV526363 | BE526746 | AI489634 | AI490544 | CO52806  | EE184474 |
| AV526483 | AV519515 | AI489673 | AI898482 | CO52886  | DR958676 |
| AV526520 | BE038167 | AI489760 | AW455268 | CO52896  | DR811403 |
| AV526597 | CK120349 | AI489801 | BE450829 | CO52896  | EB702222 |
| AV526597 | CK120521 | AI489818 | AW217552 | CO52904  | CO52688  |
| AV526617 | CK120349 | AI489818 | BG128007 | CO52904  | EB814486 |

|          |          |          |          |          |          |
|----------|----------|----------|----------|----------|----------|
| AV526634 | CK120349 | AI489969 | AI486469 | CO52908  | EE029515 |
| AV526634 | CK120521 | AI489991 | AW033288 | CO52917  | EC893689 |
| AV526690 | AV526335 | AI490047 | AI485787 | CO52941  | DY623754 |
| AV526768 | AV526335 | AI490047 | AW621240 | CO53030  | EE171085 |
| AV526861 | CK120349 | AI490055 | AI896372 | CO53040  | DR967179 |
| AV526861 | CK120521 | AI490055 | AI899269 | CO53097  | DR819248 |
| AV526985 | CK120349 | AI490055 | AW033996 | CO53097  | DV510110 |
| AV526993 | BE521815 | AI490060 | AI486872 | CO53129  | EE287701 |
| AV526996 | N37229   | AI490062 | AW217552 | CO53256  | DV169456 |
| AV527042 | N37229   | AI490062 | BG128007 | CO53257  | EB405603 |
| AV527276 | AV524460 | AI490105 | AW933726 | CO53296  | DV539671 |
| AV527357 | BE520542 | AI490135 | AI485713 | CO53385  | DV024187 |
| AV527390 | AV526335 | AI490210 | AW934308 | CO53468  | CF647286 |
| AV527407 | CK120349 | AI490280 | AI487596 | CO53476  | CB605241 |
| AV527407 | CK120521 | AI490309 | AI485787 | CO53497  | DR822588 |
| AV527430 | CK120521 | AI490315 | AI895577 | DN203767 | EE028700 |
| AV527526 | CK120349 | AI490315 | AW218947 | DN205065 | EC874916 |
| AV527631 | CK121367 | AI490315 | BE354228 | DN205184 | DN211082 |
| AV527720 | CK120349 | AI490315 | BE459953 | DN205365 | EE183791 |
| AV527797 | AV538292 | AI490318 | AI896372 | DN205461 | DN210835 |
| AV527798 | CK121367 | AI490318 | AI899269 | DN205956 | CB331376 |
| AV527942 | AV526335 | AI490333 | AI482715 | DN206148 | DY689130 |
| AV527989 | AV552942 | AI490357 | AW737933 | DN206295 | DR803184 |
| AV528095 | AV527270 | AI490427 | BG134468 | DN207114 | DR803184 |
| AV528278 | AV529703 | AI490443 | AI487717 | DN207904 | AI649667 |
| AV528305 | CK120349 | AI490443 | AI488251 | DN207967 | DV502076 |
| AV528305 | CK120521 | AI490499 | AI771696 | DN208003 | BM34145  |
| AV528353 | AV529325 | AI490507 | AI487717 | DN208257 | DR958758 |
| AV528891 | AV529325 | AI490507 | AI488251 | DN208367 | EB704882 |
| AV529041 | AV530043 | AI490507 | AI490147 | DN208689 | DV502076 |
| AV529098 | AV530043 | AI490520 | AI485634 | DN209647 | DN226988 |
| AV529256 | AV529287 | AI490551 | AI896372 | DN209647 | DN232542 |
| AV529420 | AV528818 | AI490551 | AI899269 | DN209647 | DN233307 |
| AV529428 | AV528467 | AI490551 | AW033996 | DN210070 | EB641728 |
| AV529477 | AV528432 | AI490566 | BI922482 | DN210606 | EB406031 |
| AV529477 | AV529229 | AI490656 | AI896372 | DN210715 | BG841409 |
| AV529477 | AV530247 | AI490656 | AI899269 | DN210715 | DR803386 |
| AV529477 | AV530273 | AI490656 | AW033996 | DN210715 | DR959555 |
| AV529779 | AV524353 | AI490895 | AW033258 | DN210715 | DT945285 |
| AV529889 | AV529325 | AI490931 | AW625615 | DN210715 | DY241371 |
| AV530058 | AV529325 | AI490957 | BE451023 | DN210715 | EB164241 |
| AV530399 | CK120349 | AI491014 | BI423030 | DN210715 | EB400692 |
| AV530399 | CK120521 | AI491191 | AI489351 | DN211164 | DR791460 |
| AV530408 | CK120349 | AI771102 | BI928753 | DN211659 | EC892933 |
| AV530408 | CK120521 | AI771112 | BI423089 | DN212053 | CB331336 |
| AV530445 | AV520531 | AI771115 | AI771696 | DN212557 | DV021217 |
| AV530456 | CK121367 | AI771118 | AI483358 | DN213116 | CB605160 |
| AV530769 | AV518146 | AI771127 | AI487773 | DN213164 | DV520817 |
| AV530769 | AV518565 | AI771182 | AW624122 | DN213778 | CD573486 |
| AV530769 | AV519058 | AI771182 | AW625692 | DN213816 | EE162844 |
| AV530769 | AV519267 | AI771207 | AW624908 | DN214329 | BM07303  |
| AV530769 | AV520926 | AI771245 | AI485634 | DN214461 | CB351040 |

|          |          |          |          |          |          |
|----------|----------|----------|----------|----------|----------|
| AV530769 | AV525650 | AI771325 | BG126887 | DN214461 | CD527848 |
| AV530769 | AV531257 | AI771327 | BG643873 | DN214836 | CD661883 |
| AV530769 | AV534468 | AI771327 | BI930008 | DN215143 | BM07856  |
| AV530769 | AV536579 | AI771525 | AI771638 | DN215287 | DV026045 |
| AV530769 | BU636612 | AI771614 | AI895945 | DN215885 | CO53271  |
| AV530769 | CK120097 | AI771623 | BG713789 | DN216326 | EC900241 |
| AV530847 | AV520531 | AI771643 | AI486468 | DN216525 | DN229407 |
| AV530926 | CK120349 | AI771649 | AI482715 | DN216711 | BM07881  |
| AV531032 | CK120349 | AI771659 | AI485987 | DN216738 | EB158516 |
| AV531032 | CK120521 | AI771660 | AI771638 | DN216741 | DN210134 |
| AV531063 | CK120349 | AI771673 | AW737933 | DN216741 | DN227218 |
| AV531063 | CK120521 | AI771679 | AI484923 | DN217908 | DN222723 |
| AV531096 | CK119737 | AI771699 | AW932475 | DN217931 | AI065688 |
| AV531118 | CK120521 | AI771705 | AW621805 | DN218060 | BM34145  |
| AV531170 | CK120349 | AI771708 | BG125962 | DN218060 | EC901467 |
| AV531195 | BE038890 | AI771718 | AI490147 | DN218433 | CB617032 |
| AV531314 | BE038890 | AI771721 | BI932608 | DN218433 | DN218466 |
| AV531371 | AV519058 | AI771744 | AI488251 | DN218437 | DN210835 |
| AV531371 | AV519267 | AI771744 | AI490147 | DN219008 | DV505007 |
| AV531371 | AV520926 | AI771760 | AI485987 | DN219203 | EB705696 |
| AV531371 | AV531257 | AI771798 | BI928261 | DN219566 | DN212456 |
| AV531371 | AV534468 | AI771846 | AI771696 | DN220175 | CB331336 |
| AV531371 | BU636612 | AI771859 | AI899269 | DN220575 | DN210134 |
| AV531371 | CK120097 | AI771886 | BI922482 | DN220575 | DN227218 |
| AV531482 | CK120521 | AI771920 | AW621805 | DN221332 | DR812828 |
| AV531888 | CK120521 | AI776982 | AW030367 | DN221514 | DW90138  |
| AV532111 | CK120521 | AI776982 | AW033678 | DN221669 | CB816495 |
| AV532129 | CK120349 | AI776982 | AW033793 | DN221883 | DV172619 |
| AV532248 | AV518781 | AI777028 | BG713789 | DN221961 | EB165436 |
| AV532248 | AV519267 | AI777029 | BG713789 | DN222787 | BM33917  |
| AV532248 | AV525650 | AI777326 | AW030133 | DN223019 | DN204788 |
| AV532248 | AV531257 | AI777339 | AW036047 | DN223104 | DN205546 |
| AV532248 | AV534468 | AI894377 | AW030367 | DN223407 | CB885714 |
| AV532248 | AV536579 | AI894380 | AW030121 | DN224109 | AI396102 |
| AV532248 | BE038932 | AI894391 | AW030141 | DN224109 | BG842167 |
| AV532248 | BU636612 | AI894445 | AW033678 | DN224247 | DN220253 |
| AV532248 | CK120097 | AI894450 | AW650116 | DN224431 | DN229595 |
| AV532276 | AV441150 | AI894450 | AW650882 | DN224761 | EE025722 |
| AV532429 | CK120349 | AI894450 | AW651299 | DN224777 | EE033755 |
| AV532429 | CK120521 | AI894450 | BE354061 | DN224878 | DN218252 |
| AV532559 | CK120349 | AI894450 | BF051451 | DN225620 | DN217096 |
| AV532559 | CK120521 | AI894450 | BI423046 | DN225621 | DN217096 |
| AV532675 | AV520531 | AI894452 | AW033678 | DN225723 | CB605160 |
| AV532705 | CK120349 | AI894452 | AW033793 | DN225763 | BM33858  |
| AV532772 | CB074298 | AI894483 | AW031841 | DN225763 | BM34117  |
| AV533464 | CK120349 | AI894497 | AI486063 | DN226007 | DR816268 |
| AV533464 | CK120521 | AI894498 | BE441067 | DN226126 | AI444765 |
| AV533708 | CK120349 | AI894502 | BI421720 | DN226126 | DN204111 |
| AV533708 | CK120521 | AI894595 | AW033793 | DN226126 | DN212456 |
| AV533739 | T13880   | AI894630 | AW621240 | DN226210 | DR801981 |
| AV533757 | CK121367 | AI894635 | AI486978 | DN226640 | EE037317 |
| AV533781 | AV518038 | AI894671 | AW932475 | DN226676 | DV528178 |



|          |          |          |          |          |          |
|----------|----------|----------|----------|----------|----------|
| AV533781 | AV518343 | AI894682 | BI423371 | DN226998 | DV502076 |
| AV533781 | AV518565 | AI894682 | BI930973 | DN227737 | EB161121 |
| AV533781 | AV518597 | AI894682 | BI932124 | DN227866 | DN210860 |
| AV533781 | AV518781 | AI894736 | AW031522 | DN228506 | DN210284 |
| AV533781 | AV519421 | AI894736 | BE450348 | DN228638 | DN210835 |
| AV533781 | AV530939 | AI894736 | BE451600 | DN228728 | DN217096 |
| AV533781 | AV534468 | AI894757 | AW030367 | DN229156 | DW72563  |
| AV533781 | BE038932 | AI894774 | AW033678 | DN229685 | DN227453 |
| AV533853 | CK120349 | AI894774 | AW033793 | DN229779 | DR801048 |
| AV533909 | CK120349 | AI894825 | BG134587 | DN229850 | DN210835 |
| AV534028 | AV520531 | AI894848 | AW031705 | DN230043 | EB408082 |
| AV534062 | CK118425 | AI894863 | AW030367 | DN230197 | DN210031 |
| AV534100 | CK120521 | AI894863 | AW033678 | DN230197 | DV540192 |
| AV534195 | T13880   | AI894863 | AW033793 | DN230439 | DN228282 |
| AV534259 | T13880   | AI894890 | AW030367 | DN230595 | DN204674 |
| AV534335 | CK120349 | AI894921 | AW033793 | DN230626 | CA989144 |
| AV534335 | CK120521 | AI895015 | AW030195 | DN230626 | CB280832 |
| AV534375 | CK120349 | AI895025 | AW930070 | DN230626 | DN208611 |
| AV534375 | CK120521 | AI895031 | AI485787 | DN230626 | DN209061 |
| AV534696 | CK120521 | AI895083 | AW030367 | DN230626 | DN214637 |
| AV534798 | CK120521 | AI895083 | AW033678 | DN230626 | DN217442 |
| AV535051 | CK121367 | AI895083 | AW033793 | DN230626 | DN223820 |
| AV535160 | AV540607 | AI895090 | AW030141 | DN230821 | DN224109 |
| AV535200 | AV520531 | AI895109 | AW030367 | DN230964 | EB160750 |
| AV535287 | CK120521 | AI895109 | AW033793 | DN230986 | AI396198 |
| AV535445 | CK120349 | AI895122 | AW218458 | DN230986 | AI396353 |
| AV535451 | CK120521 | AI895136 | AW034261 | DN231011 | EC903308 |
| AV535452 | CK120349 | AI895146 | AW932370 | DN231957 | DV502076 |
| AV535452 | CK120521 | AI895147 | AW033678 | DN232133 | DR954467 |
| AV535512 | CK118403 | AI895162 | AW031134 | DN232491 | DR797446 |
| AV535555 | CK120349 | AI895194 | AW030367 | DN232868 | EE181688 |
| AV535565 | T13880   | AI895194 | AW033678 | DN232868 | EE185548 |
| AV535637 | AA651247 | AI895194 | AW033793 | DN232954 | DT647420 |
| AV535700 | AV566152 | AI895219 | AW030367 | DN232975 | EE025722 |
| AV535742 | CK120349 | AI895241 | AW033119 | DN233044 | DY536728 |
| AV535742 | CK120521 | AI895269 | AW218629 | DN233790 | DR810034 |
| AV535806 | BE522902 | AI895280 | AW030367 | DN233790 | EB673212 |
| AV535837 | CK120349 | AI895340 | AW932475 | DN233950 | DN210835 |
| AV535837 | CK120521 | AI895367 | AW030195 | DN234086 | DN219524 |
| AV536003 | CK120521 | AI895391 | AI485634 | DN234259 | EE048137 |
| AV536045 | AV518006 | AI895402 | AW219292 | DN234380 | DR954335 |
| AV536045 | AV518176 | AI895419 | AW621805 | DR784834 | DR961484 |
| AV536045 | AV518259 | AI895453 | AW932475 | DR785443 | DT945214 |
| AV536045 | AV518343 | AI895491 | AW030367 | DR785443 | EB701263 |
| AV536045 | AV518565 | AI895497 | AW220276 | DR785443 | EE041461 |
| AV536045 | AV518597 | AI895534 | AW030190 | DR785568 | DY690713 |
| AV536045 | AV518675 | AI895563 | AW622332 | DR785660 | DR967585 |
| AV536143 | CK119737 | AI895584 | AW030141 | DR786050 | DV024288 |
| AV536143 | CK121367 | AI895675 | AW034756 | DR786050 | DV534765 |
| AV536226 | CK120349 | AI895695 | AW030367 | DR786050 | EB822239 |
| AV536243 | AV537687 | AI895745 | AW625715 | DR786050 | EE187389 |
| AV536529 | N37744   | AI895745 | AW626381 | DR786523 | DR971188 |

|          |          |          |          |          |          |
|----------|----------|----------|----------|----------|----------|
| AV536529 | N37748   | AI895745 | AW928978 | DR786523 | DV021642 |
| AV536618 | AV521139 | AI895745 | BI925840 | DR786624 | DV530744 |
| AV536702 | BE662927 | AI895773 | AW030367 | DR786647 | EE178343 |
| AV536723 | N65111   | AI895797 | AW030367 | DR787175 | DY621085 |
| AV536723 | R29772   | AI895839 | AI894888 | DR787203 | DV033833 |
| AV536790 | T76542   | AI895866 | AW033678 | DR787302 | DV174367 |
| AV536884 | CK121367 | AI895903 | AW030367 | DR787604 | DN214757 |
| AV536886 | CK120349 | AI895903 | AW033678 | DR788163 | DV027863 |
| AV536886 | CK120521 | AI895903 | AW033793 | DR788434 | DY233621 |
| AV536968 | AV557447 | AI895919 | AW030367 | DR788549 | DR831034 |
| AV537107 | AV536135 | AI895981 | AW030367 | DR788832 | BM37988  |
| AV537139 | BE530048 | AI895995 | AW033678 | DR788832 | CD650748 |
| AV537183 | AV521261 | AI896001 | AW033678 | DR788832 | DR799495 |
| AV537183 | CK118684 | AI896035 | AW033678 | DR788832 | EE189801 |
| AV537440 | AA395870 | AI896035 | AW033793 | DR789470 | DR795249 |
| AV537516 | AV522497 | AI896040 | AI486469 | DR789797 | DY538355 |
| AV537519 | R65053   | AI896060 | AI894986 | DR789898 | EC884006 |
| AV537733 | AV518565 | AI896151 | BE458997 | DR789912 | DV504084 |
| AV537733 | AV518597 | AI896161 | AI486469 | DR790740 | DR826546 |
| AV537733 | AV518781 | AI896249 | AW030141 | DR791313 | EE171279 |
| AV537733 | AV519421 | AI896286 | AW030133 | DR792563 | DV020780 |
| AV537733 | AV530939 | AI896351 | AI483681 | DR792755 | DV528500 |
| AV537733 | AV534468 | AI896351 | AI894523 | DR794375 | DR802228 |
| AV537733 | BE038932 | AI896351 | AI897280 | DR794614 | BG841156 |
| AV538418 | AV556083 | AI896351 | AI899269 | DR795027 | DR798503 |
| AV538418 | AV558839 | AI896409 | AW030141 | DR795187 | DV020780 |
| AV538746 | CK120349 | AI896476 | AW621240 | DR795245 | EB162041 |
| AV539092 | AV557100 | AI896500 | AW033678 | DR795718 | EB637475 |
| AV539629 | AV544387 | AI896500 | AW033793 | DR796175 | EB704309 |
| AV540013 | CK120349 | AI896518 | BI926695 | DR796288 | EE032676 |
| AV540454 | R65053   | AI896582 | BG713789 | DR797830 | DR806237 |
| AV541814 | AA395870 | AI896607 | AI486469 | DR798357 | DY237472 |
| AV542030 | AV543200 | AI896684 | AW030141 | DR798357 | EE022514 |
| AV542127 | CK119737 | AI896697 | AW030367 | DR798544 | CF649499 |
| AV542127 | CK121367 | AI896697 | AW033678 | DR798804 | EE153919 |
| AV542419 | CK118425 | AI896709 | AW932680 | DR799033 | EE040879 |
| AV542754 | AA395870 | AI896716 | BI422139 | DR799839 | CO52818  |
| AV543337 | CK121367 | AI896725 | AW030367 | DR800200 | DR790215 |
| AV543385 | N37748   | AI896793 | AW031841 | DR800280 | DR797329 |
| AV543519 | AV521296 | AI896835 | AI485051 | DR800386 | EC903472 |
| AV543542 | AV540607 | AI896835 | AI489351 | DR800614 | DV025611 |
| AV543871 | AV544387 | AI896858 | AW621199 | DR801720 | EE159318 |
| AV543973 | R29961   | AI896883 | AW931563 | DR801823 | DN234298 |
| AV544049 | DR751702 | AI896921 | AW030367 | DR803311 | AI622579 |
| AV544291 | AV521296 | AI896921 | AW033678 | DR804060 | DR784845 |
| AV544312 | N37748   | AI896987 | AI489292 | DR804060 | DV173424 |
| AV544383 | AV520068 | AI897009 | AI486468 | DR804387 | DV021012 |
| AV544383 | CK121708 | AI897031 | AI897468 | DR804387 | EE293956 |
| AV544396 | AA395870 | AI897031 | BI922990 | DR804518 | EC901301 |
| AV544396 | N37744   | AI897035 | AI487717 | DR804866 | EB819928 |
| AV544396 | N37748   | AI897035 | AI490147 | DR805170 | EB673362 |
| AV544454 | AV537361 | AI897072 | AW220104 | DR805709 | DN210181 |

|          |          |          |          |          |          |
|----------|----------|----------|----------|----------|----------|
| AV544491 | T20959   | AI897072 | BG123318 | DR805709 | DV507453 |
| AV544491 | T44507   | AI897072 | BG125025 | DR806097 | BM34915  |
| AV545075 | AA395870 | AI897072 | BG125573 | DR806157 | DN211859 |
| AV545075 | N37744   | AI897072 | BG126633 | DR806226 | EE190794 |
| AV545075 | N37748   | AI897075 | AI486469 | DR806927 | EC905273 |
| AV545106 | AV522623 | AI897076 | AI489292 | DR807755 | DR795249 |
| AV545269 | AV522820 | AI897122 | AI771638 | DR808808 | DR819913 |
| AV545325 | Z24487   | AI897165 | AI487773 | DR809124 | EE153919 |
| AV545633 | AV557100 | AI897185 | AI899010 | DR809261 | DT639853 |
| AV545806 | N37748   | AI897186 | AI485729 | DR809345 | DR795249 |
| AV545928 | AV441399 | AI897192 | AW621226 | DR809913 | DN220483 |
| AV546135 | N37744   | AI897257 | AI483681 | DR809998 | DY688961 |
| AV546135 | N37748   | AI897257 | AI894523 | DR810196 | DV537695 |
| AV546234 | AA395870 | AI897257 | AI896372 | DR810759 | EE187478 |
| AV546349 | DR751613 | AI897257 | AI897280 | DR811673 | DR797962 |
| AV546682 | AA395870 | AI897257 | AI899269 | DR811995 | DT940484 |
| AV546869 | AV441182 | AI897272 | AW621406 | DR812332 | DR966412 |
| AV546869 | AV538292 | AI897287 | AI897468 | DR812747 | DR830462 |
| AV548096 | AV521296 | AI897287 | BI922990 | DR813777 | EE290879 |
| AV548843 | AV543754 | AI897329 | AI489292 | DR813921 | EB164105 |
| AV549043 | AV545568 | AI897342 | AI487717 | DR814711 | DR789627 |
| AV549043 | CA781619 | AI897342 | AI488251 | DR815353 | DV533792 |
| AV549043 | H36327   | AI897348 | AI488661 | DR815517 | EE179790 |
| AV549187 | AV550364 | AI897352 | AI485787 | DR815843 | EE036411 |
| AV549255 | N37744   | AI897377 | AW621199 | DR816003 | EC887289 |
| AV549255 | N37748   | AI897401 | AI897468 | DR816277 | DV509947 |
| AV549272 | AV543826 | AI897401 | BI922990 | DR816573 | DR799093 |
| AV549272 | AV544880 | AI897423 | AI896372 | DR816900 | DV505862 |
| AV549272 | AV548978 | AI897423 | AI899269 | DR817495 | EE038452 |
| AV549272 | AV549393 | AI897433 | AW621240 | DR817542 | DR811203 |
| AV549272 | AV552307 | AI897442 | AI483681 | DR818377 | DV020780 |
| AV549452 | BE038167 | AI897442 | AI894523 | DR818424 | DT641351 |
| AV549531 | AV549212 | AI897442 | AI896372 | DR818616 | T18421   |
| AV549531 | AV554010 | AI897442 | AI897280 | DR819005 | DY541180 |
| AV549548 | AV534403 | AI897442 | AW033996 | DR819094 | DV503810 |
| AV549691 | CK121367 | AI897459 | AI489292 | DR819326 | BM33584  |
| AV550037 | BE523098 | AI897485 | AW030133 | DR819635 | EB817478 |
| AV550338 | CK121223 | AI897551 | BI931505 | DR819865 | DR817814 |
| AV550538 | AV551746 | AI897638 | BG135524 | DR819944 | EC888518 |
| AV550538 | AV563663 | AI897726 | AW030133 | DR821224 | DY690280 |
| AV550538 | Z17492   | AI897730 | AI486469 | DR821362 | EC880407 |
| AV550543 | CK120349 | AI897752 | AI486063 | DR821362 | EC894028 |
| AV550543 | CK120521 | AI897752 | AI486469 | DR821362 | EE017739 |
| AV550665 | AV554057 | AI897848 | BI922990 | DR821362 | EE037611 |
| AV550765 | BE524799 | AI897888 | BI926572 | DR821362 | EE039241 |
| AV551044 | BE038059 | AI897908 | BF050216 | DR821362 | EE181426 |
| AV551044 | BE529092 | AI897918 | AI486063 | DR821759 | EB166558 |
| AV551160 | CK120349 | AI897918 | AI486469 | DR822364 | EC894628 |
| AV551160 | CK120521 | AI897924 | BG123888 | DR822364 | EE186324 |
| AV551903 | AV540778 | AI897924 | BG125573 | DR822364 | EE292824 |
| AV552190 | AV551533 | AI897924 | BG125795 | DR822598 | DR792652 |
| AV552190 | AV551623 | AI897924 | BG126688 | DR822598 | EE188637 |

|          |          |          |          |          |          |
|----------|----------|----------|----------|----------|----------|
| AV552794 | AV521296 | AI897930 | BI923091 | DR823407 | DT946279 |
| AV552830 | CK120359 | AI897941 | BG135430 | DR823413 | EE014486 |
| AV553028 | T44766   | AI897980 | BI922990 | DR823694 | CO52211  |
| AV553103 | AV536996 | AI898015 | BI922713 | DR823694 | DR800665 |
| AV553103 | AV550819 | AI898058 | AI896372 | DR823694 | EB158584 |
| AV553103 | BE523705 | AI898058 | AW033996 | DR824812 | EB674931 |
| AV553681 | T45330   | AI898075 | AW217552 | DR824911 | EE013381 |
| AV553729 | BG459606 | AI898115 | AW030133 | DR825039 | DT648758 |
| AV553737 | N37748   | AI898243 | AW934308 | DR825870 | DN217096 |
| AV554093 | BE039250 | AI898263 | AI483681 | DR825961 | DV543832 |
| AV554512 | AV527466 | AI898263 | AI894523 | DR826023 | DR800665 |
| AV554648 | CK118403 | AI898263 | AI896372 | DR826023 | DY241419 |
| AV554725 | AA720293 | AI898263 | AI897280 | DR826291 | CO52112  |
| AV554725 | CK119561 | AI898263 | AI899269 | DR826291 | DY690352 |
| AV554725 | CK121460 | AI898266 | AW033679 | DR826291 | EE035360 |
| AV554751 | AV554924 | AI898456 | AW647983 | DR826366 | EB642398 |
| AV554887 | AV529097 | AI898456 | BG132865 | DR826375 | DY234545 |
| AV555411 | CA781343 | AI898567 | AI896372 | DR826531 | DT646311 |
| AV555718 | CK120349 | AI898567 | AI899269 | DR826723 | CO52822  |
| AV555718 | CK120521 | AI898571 | AI898525 | DR826723 | EC890077 |
| AV556080 | AV557100 | AI898590 | AI482715 | DR827123 | EE161559 |
| AV556551 | AV518146 | AI898601 | BI423371 | DR827646 | DV521946 |
| AV556551 | AV518565 | AI898638 | BG135665 | DR827977 | DV523077 |
| AV556551 | AV518675 | AI898654 | AI485787 | DR828149 | DN223749 |
| AV556551 | AV519058 | AI898672 | AI489351 | DR828267 | DR807403 |
| AV556551 | AV525650 | AI898685 | AW624510 | DR829012 | DT946711 |
| AV556551 | AV534468 | AI898689 | AW029653 | DR829366 | DR818904 |
| AV556551 | AV536579 | AI898689 | AW220104 | DR829387 | EE028234 |
| AV556758 | CK120521 | AI898779 | AI490544 | DR829472 | DY689130 |
| AV557376 | AI100565 | AI898785 | AI487773 | DR830128 | DR806694 |
| AV557376 | AV560882 | AI898849 | AW621240 | DR830128 | DT940194 |
| AV557376 | AV561200 | AI898890 | AI896372 | DR830128 | EB703262 |
| AV557376 | AV561360 | AI898897 | AI898456 | DR830128 | EC889050 |
| AV557376 | AV561566 | AI898939 | BG134358 | DR830233 | EE042510 |
| AV557376 | AV563571 | AI898964 | AI486854 | DR830364 | CO53369  |
| AV557376 | AV567160 | AI898964 | AI771695 | DR830364 | DV505563 |
| AV557376 | BE522719 | AI898964 | AI897184 | DR830364 | EB709124 |
| AV557743 | AV537687 | AI898964 | AI899010 | DR830397 | EB642398 |
| AV557856 | CK120349 | AI899014 | AW621199 | DR831027 | EC890841 |
| AV557856 | CK120521 | AI899131 | AI489351 | DR831343 | EC882086 |
| AV557888 | CK121367 | AI899138 | AI486469 | DR954384 | CO52179  |
| AV558518 | CK120349 | AI899182 | AW621226 | DR954384 | DR956762 |
| AV558593 | CK120349 | AI899202 | AI771528 | DR954384 | DY624086 |
| AV558677 | CK120349 | AI899207 | AW218510 | DR954384 | EE027969 |
| AV558709 | AV566583 | AI899207 | AW624510 | DR954384 | EE188923 |
| AV558971 | AV518006 | AI899207 | BI926184 | DR954561 | DV025611 |
| AV558971 | AV518176 | AI899223 | AW033288 | DR954646 | DV538331 |
| AV558971 | AV518259 | AI899258 | AI487717 | DR955738 | EC872899 |
| AV558971 | AV518343 | AI899403 | AW035342 | DR957671 | DN223002 |
| AV558971 | AV518565 | AI899403 | BI423139 | DR958689 | DV168820 |
| AV558971 | AV518597 | AW029695 | BI926560 | DR958796 | EE038101 |
| AV558971 | AV518675 | AW029705 | AW032942 | DR959078 | CO52816  |

|          |          |          |          |          |          |
|----------|----------|----------|----------|----------|----------|
| AV559100 | AV518006 | AW029705 | BI922134 | DR959185 | DV024288 |
| AV559100 | AV518176 | AW029764 | AW033678 | DR959185 | DV534765 |
| AV559100 | AV518248 | AW029764 | AW033793 | DR959185 | EB822239 |
| AV559100 | AV518259 | AW029774 | AW033793 | DR959185 | EE187389 |
| AV559100 | AV518343 | AW029798 | AW030121 | DR959413 | DR788776 |
| AV559100 | AV518565 | AW029816 | AW031705 | DR959777 | CD670250 |
| AV559100 | AV518597 | AW029824 | AW625770 | DR960198 | CB331336 |
| AV559100 | AV518675 | AW029870 | AI895782 | DR961331 | DR812828 |
| AV559100 | AV519371 | AW029885 | AW030367 | DR961503 | DY233621 |
| AV559100 | AV519426 | AW029885 | AW033678 | DR961871 | DR804544 |
| AV559100 | AV519791 | AW029885 | AW033793 | DR961871 | DV174295 |
| AV559146 | AA712353 | AW029888 | AW030121 | DR961871 | EB641198 |
| AV559440 | N37229   | AW029890 | AI486854 | DR961871 | EE170730 |
| AV560100 | CK120349 | AW029890 | AI487123 | DR962090 | EE038101 |
| AV560100 | CK120521 | AW029890 | AI897379 | DR963646 | DR803561 |
| AV560349 | AV557100 | AW029890 | AI897932 | DR963980 | EB707397 |
| AV560560 | CK120349 | AW029899 | AW033678 | DR964375 | DT643483 |
| AV560560 | CK120521 | AW029997 | AW031841 | DR964849 | DT941242 |
| AV560990 | CK120349 | AW029997 | AW033119 | DR964884 | DR831395 |
| AV560996 | CK120349 | AW030032 | AW035369 | DR964895 | DR965780 |
| AV561040 | CK120349 | AW030055 | AI486854 | DR964908 | EC875510 |
| AV561040 | CK120521 | AW030055 | AI487123 | DR964947 | DV537695 |
| AV561203 | AV540012 | AW030055 | AI897379 | DR965641 | EB819928 |
| AV561484 | CK120349 | AW030055 | AI897932 | DR966065 | DT649573 |
| AV561484 | CK120521 | AW030055 | AI899310 | DR966281 | EE041452 |
| AV561602 | CK120349 | AW030059 | AW030367 | DR966691 | EE175686 |
| AV561676 | AV520531 | AW030074 | AW218629 | DR966775 | CF649688 |
| AV561899 | CK121367 | AW030100 | AW033119 | DR966844 | EB817074 |
| AV561904 | CK120349 | AW030111 | AI485787 | DR968568 | DV518868 |
| AV561904 | CK120521 | AW030111 | AW621240 | DR968645 | CO53295  |
| AV562017 | CK120349 | AW030125 | AW034124 | DR968994 | DR808812 |
| AV562150 | CK120349 | AW030126 | BI933271 | DR969101 | DN220123 |
| AV562177 | AV545157 | AW030179 | AW216537 | DR969164 | DN230844 |
| AV562340 | AA713044 | AW030277 | AW030367 | DR970432 | DR828609 |
| AV562340 | AV518038 | AW030277 | AW033678 | DR971010 | DR809122 |
| AV562340 | AV518146 | AW030277 | AW033793 | DR971127 | DR795249 |
| AV562340 | AV518343 | AW030283 | AW033793 | DR971526 | DN204538 |
| AV562340 | AV518565 | AW030293 | AW932475 | DR971553 | DV526643 |
| AV562340 | AV518597 | AW030318 | AW031841 | DR971592 | DR804433 |
| AV562340 | AV518675 | AW030322 | AW932475 | DR971764 | DV533754 |
| AV562340 | AV518781 | AW030395 | AW932475 | DT640034 | DV511248 |
| AV562340 | AV519058 | AW030400 | BE458997 | DT640034 | EB402257 |
| AV562340 | AV519421 | AW030401 | BI922482 | DT640034 | EE020342 |
| AV562340 | AV525650 | AW030403 | AW033678 | DT640567 | EC881756 |
| AV562340 | AV530939 | AW030409 | AW033003 | DT640586 | DR961484 |
| AV562340 | AV534468 | AW030420 | AW030367 | DT640632 | DV025611 |
| AV562340 | AV536579 | AW030420 | AW033678 | DT640701 | DR802751 |
| AV562340 | BE038932 | AW030435 | AI488251 | DT640705 | DT651752 |
| AV562489 | CK119365 | AW030447 | AW033678 | DT640802 | EE039873 |
| AV562518 | BU635280 | AW030447 | AW033793 | DT641254 | DV166784 |
| AV562522 | CK120349 | AW030472 | BG713789 | DT641416 | DY536008 |
| AV562522 | CK120521 | AW030497 | BF052055 | DT641685 | CO52619  |

|          |          |          |          |          |          |
|----------|----------|----------|----------|----------|----------|
| AV562739 | CK121367 | AW030531 | BE449826 | DT641757 | DV512264 |
| AV562921 | BE038025 | AW030548 | AW621240 | DT642160 | DT652297 |
| AV563360 | CK120349 | AW030550 | AI896995 | DT642160 | DV021476 |
| AV563365 | AV546540 | AW030556 | AW033678 | DT642160 | DV164747 |
| AV563365 | AV558715 | AW030556 | AW033793 | DT642638 | DV169108 |
| AV563418 | CK120349 | AW030670 | AI489351 | DT642964 | DN231456 |
| AV563570 | CK120349 | AW030735 | AI484860 | DT643203 | DR797278 |
| AV563570 | CK120521 | AW030745 | AW033119 | DT644439 | EE038101 |
| AV564033 | AV545906 | AW030773 | AW031705 | DT644459 | DV025611 |
| AV564148 | CK120349 | AW030776 | AW033678 | DT644610 | DY621085 |
| AV564148 | CK120521 | AW030779 | AW932475 | DT644821 | DN227453 |
| AV564245 | AV518006 | AW030801 | AW030367 | DT644834 | EB167103 |
| AV564245 | AV518146 | AW030857 | AW030367 | DT645062 | EC903472 |
| AV564245 | AV518176 | AW030859 | AW932475 | DT645074 | DT943268 |
| AV564245 | AV518248 | AW030861 | AW030367 | DT645450 | DY530601 |
| AV564245 | AV518259 | AW030899 | AW030123 | DT645466 | CA989058 |
| AV564245 | AV518343 | AW030929 | AW033793 | DT645486 | EE038452 |
| AV564245 | AV518565 | AW030943 | AW033678 | DT645615 | DR798498 |
| AV564245 | AV518597 | AW030976 | AI486063 | DT645839 | DT944629 |
| AV564245 | AV518675 | AW030976 | AI486469 | DT646103 | DY532351 |
| AV564245 | AV519058 | AW030992 | AI489351 | DT646497 | DV025611 |
| AV564245 | AV519267 | AW030996 | AW033793 | DT646888 | EB674931 |
| AV564245 | AV519371 | AW031002 | AW621199 | DT647064 | BG354531 |
| AV564245 | AV519426 | AW031005 | AW033793 | DT647784 | DR798249 |
| AV564245 | AV519791 | AW031048 | AW030367 | DT648742 | EB818702 |
| AV564245 | AV520926 | AW031102 | AW033119 | DT648929 | DR811203 |
| AV564245 | AV525650 | AW031112 | AW033678 | DT649361 | DR827374 |
| AV564245 | AV531257 | AW031149 | BG129317 | DT649571 | DV025611 |
| AV564245 | AV534468 | AW031162 | AW933595 | DT649919 | DR966276 |
| AV564245 | AV536579 | AW031212 | BG124906 | DT650152 | EB167452 |
| AV564245 | BU636612 | AW031278 | AW033678 | DT651231 | EB405603 |
| AV564245 | CK120097 | AW031300 | AW030367 | DT651356 | DV024147 |
| AV564604 | CK120349 | AW031300 | AW033678 | DT652281 | EE047612 |
| AV564619 | CK120349 | AW031300 | AW033793 | DT652306 | EB676320 |
| AV564679 | CK120349 | AW031314 | AW030367 | DT652458 | DT942251 |
| AV564796 | CK120349 | AW031332 | AW033678 | DT653061 | DN223749 |
| AV564796 | CK120521 | AW031387 | AW033678 | DT653515 | CO52619  |
| AV564908 | AV547769 | AW031387 | AW033793 | DT653602 | BM26748  |
| AV564908 | AV557100 | AW031397 | AI486469 | DT937661 | DY532351 |
| AV564938 | AV538501 | AW031419 | AW033793 | DT938511 | DN231876 |
| AV564938 | AV541939 | AW031427 | BI923091 | DT938607 | DV164450 |
| AV564938 | AV548335 | AW031445 | AW030367 | DT939075 | EE014486 |
| AV564938 | AV564564 | AW031445 | AW033678 | DT939242 | EB638089 |
| AV564938 | AV565960 | AW031445 | AW033793 | DT940468 | DV531595 |
| AV564938 | AV566503 | AW031462 | BI932956 | DT940468 | DY233268 |
| AV565064 | AA712353 | AW031478 | AW621240 | DT940528 | DV541008 |
| AV565078 | CK120349 | AW031501 | AI486854 | DT940528 | DV541009 |
| AV565215 | CK120521 | AW031501 | AI487123 | DT940851 | DT646784 |
| AV565243 | CK120349 | AW031501 | AI897379 | DT941035 | EE164445 |
| AV565243 | CK120521 | AW031501 | AI897932 | DT941177 | CB280778 |
| AV565283 | CK120349 | AW031520 | BE458997 | DT941507 | DV538331 |
| AV565591 | CK120349 | AW031549 | AW030367 | DT941539 | EC875510 |

|          |          |          |          |          |          |
|----------|----------|----------|----------|----------|----------|
| AV565696 | CK120349 | AW031549 | AW033678 | DT941670 | CO52104  |
| AV565696 | CK120521 | AW031549 | AW033793 | DT941845 | EB707056 |
| AV565713 | AV531338 | AW031573 | AI897345 | DT941875 | DR826282 |
| AV565713 | AV531459 | AW031583 | AW622742 | DT941875 | EE295023 |
| AV565713 | AV531476 | AW031675 | AW649566 | DT942490 | DR790578 |
| AV565713 | AV532317 | AW031675 | AW933172 | DT942678 | DY687874 |
| AV565713 | AV532943 | AW031682 | AW030367 | DT943765 | DV025611 |
| AV565713 | AV534279 | AW031682 | AW033678 | DT944411 | EC895139 |
| AV565713 | AV534515 | AW031743 | AW030102 | DT945528 | DV025688 |
| AV565713 | AV535090 | AW031760 | BG129317 | DT945579 | DY620497 |
| AV565713 | AV556279 | AW031794 | AI486469 | DT946017 | EB708276 |
| AV565713 | AV560984 | AW031810 | AW624569 | DT946017 | EC902679 |
| AV565713 | AV561391 | AW031810 | AW625233 | DT947075 | EB159262 |
| AV565713 | AV562708 | AW031822 | AI489351 | DT947463 | DV169108 |
| AV566129 | BE038890 | AW031870 | AW030367 | DT948027 | DV528500 |
| AV566416 | CK120349 | AW031871 | AI897345 | DT948433 | DV515269 |
| AV566416 | CK120521 | AW031915 | AW030367 | DT948452 | DR968483 |
| AV566469 | CK120349 | AW031938 | BG125908 | DT948452 | DT946992 |
| AV566494 | CK120521 | AW032000 | AI486469 | DT948452 | DV169437 |
| AV566780 | AV553283 | AW032005 | AW218050 | DT948452 | EE016402 |
| AV566781 | CK120349 | AW032005 | AW624082 | DV020174 | DN228548 |
| AV567105 | CK120521 | AW032050 | AW030141 | DV020174 | DR965618 |
| BE037619 | BE038167 | AW032101 | AW217645 | DV020174 | DY538953 |
| BE037927 | N37229   | AW032108 | AI486978 | DV020453 | DV022034 |
| BE038024 | CK120349 | AW032126 | BE450130 | DV021086 | CO51856  |
| BE038024 | CK120521 | AW032140 | BI422115 | DV021086 | DV524589 |
| BE038077 | CK121974 | AW032150 | AW932475 | DV023579 | DT647225 |
| BE038094 | CK117722 | AW032161 | AW031841 | DV024114 | DN223749 |
| BE038094 | H36812   | AW032189 | AW030133 | DV024281 | EE014705 |
| BE038094 | H76463   | AW032194 | AI899269 | DV024376 | DY531670 |
| BE038094 | T41663   | AW032247 | AW030367 | DV024803 | EC900337 |
| BE038094 | T45972   | AW032255 | AW030195 | DV025072 | DY621588 |
| BE038094 | T46309   | AW032321 | AI895608 | DV025936 | DN208329 |
| BE038094 | T75683   | AW032350 | AW030367 | DV025954 | CO52104  |
| BE038094 | T76560   | AW032350 | AW033678 | DV025954 | DT642468 |
| BE038109 | CK120349 | AW032350 | AW033793 | DV026013 | EE019636 |
| BE038109 | CK120521 | AW032378 | AW030367 | DV027091 | EE288277 |
| BE038139 | BG459606 | AW032447 | AW033678 | DV027326 | EB158516 |
| BE038176 | CK120521 | AW032447 | AW033793 | DV027677 | DN223749 |
| BE038214 | N37229   | AW032451 | AW030367 | DV028011 | DV507562 |
| BE038365 | CK120349 | AW032451 | AW033678 | DV028414 | DR831055 |
| BE038370 | CK119737 | AW032451 | AW033793 | DV028700 | BM34915  |
| BE038449 | BE038167 | AW032455 | AW030195 | DV028814 | DY541838 |
| BE038508 | BE039147 | AW032466 | AW033710 | DV029904 | DV162942 |
| BE038571 | CK120349 | AW032490 | BE449826 | DV030055 | DR967558 |
| BE038571 | CK120521 | AW032514 | AW030141 | DV030102 | DR958758 |
| BE038576 | CK120349 | AW032532 | AI483681 | DV030420 | DN219120 |
| BE038580 | CK121974 | AW032532 | AI894523 | DV030591 | DR830388 |
| BE038582 | CK120349 | AW032532 | AI897280 | DV030725 | DT944629 |
| BE038608 | AV534946 | AW032558 | AI895782 | DV030725 | DV542517 |
| BE038655 | AV553174 | AW032558 | AI895945 | DV030881 | DV025611 |
| BE038655 | DR751518 | AW032558 | BI423433 | DV031561 | CO51980  |

|          |          |          |          |          |          |
|----------|----------|----------|----------|----------|----------|
| BE038673 | CK120349 | AW032566 | AW033793 | DV031641 | EC883666 |
| BE038673 | CK120521 | AW032570 | AW033678 | DV033038 | DR969364 |
| BE038676 | CK120521 | AW032589 | AW030367 | DV033038 | DY530583 |
| BE038818 | CK120349 | AW032592 | AW031841 | DV033115 | DV028675 |
| BE038818 | CK120521 | AW032615 | AW033678 | DV033191 | DV173591 |
| BE038850 | AV525457 | AW032657 | AW030195 | DV033520 | DV021012 |
| BE038850 | AV526266 | AW032659 | AW033678 | DV033520 | EE293956 |
| BE038853 | CK120349 | AW032694 | AI486469 | DV033979 | EB638916 |
| BE038853 | CK120521 | AW032721 | AW622101 | DV162966 | DR796580 |
| BE038882 | CK121367 | AW032752 | AW030691 | DV163091 | EB674931 |
| BE038929 | CK121367 | AW032759 | AW216944 | DV163367 | DV510166 |
| BE039036 | N37229   | AW032768 | AI488251 | DV163531 | BM33281  |
| BE039103 | AV551746 | AW032768 | AI490147 | DV163662 | DR971707 |
| BE039268 | CK120349 | AW032769 | AI895373 | DV163857 | DN210377 |
| BE039268 | CK120521 | AW032769 | BI934871 | DV164035 | EC892933 |
| BE039296 | AV563588 | AW032770 | AW033793 | DV164322 | DR966389 |
| BE039343 | CK121367 | AW032771 | AW621240 | DV164704 | BG458915 |
| BE039348 | AV554207 | AW032772 | AI488251 | DV164761 | DN209801 |
| BE039497 | CK120349 | AW032772 | AI490147 | DV165272 | DV163312 |
| BE039497 | CK120521 | AW032872 | AW033727 | DV165421 | EE042471 |
| BE039511 | CK120349 | AW033013 | BI422910 | DV165700 | DV521833 |
| BE039511 | CK120521 | AW033018 | BI935586 | DV166052 | DR958122 |
| BE039540 | BU635183 | AW033034 | AW031841 | DV166166 | DV025611 |
| BE039545 | CK120349 | AW033068 | AW033678 | DV166318 | DR795249 |
| BE520175 | BE523010 | AW033075 | AW030141 | DV166792 | DV515800 |
| BE520227 | BE520358 | AW033196 | AW030367 | DV166800 | DV172667 |
| BE520227 | T45574   | AW033196 | AW033678 | DV167039 | DY237217 |
| BE520227 | T45952   | AW033196 | AW033793 | DV167482 | DN203848 |
| BE520254 | T45952   | AW033204 | AW036020 | DV167482 | DV021810 |
| BE520372 | T45952   | AW033221 | AI487717 | DV167585 | DR821457 |
| BE520536 | BE527278 | AW033221 | AI488251 | DV167792 | DR820616 |
| BE520558 | BE522559 | AW033240 | AW219300 | DV168031 | DT641351 |
| BE520567 | T45952   | AW033289 | AW030195 | DV168121 | DV539287 |
| BE520893 | BE520358 | AW033299 | AW030367 | DV169365 | DT645049 |
| BE520901 | BE520358 | AW033320 | AW030129 | DV170116 | EC877969 |
| BE521035 | N37376   | AW033320 | AW030192 | DV170568 | DR795249 |
| BE521035 | R90281   | AW033337 | AW030367 | DV171437 | DV024288 |
| BE521035 | T46210   | AW033373 | AW030367 | DV171437 | DV534765 |
| BE521035 | T46759   | AW033373 | AW033678 | DV171437 | EB822239 |
| BE521671 | AI100565 | AW033373 | AW033793 | DV171437 | EE187389 |
| BE521671 | AV555462 | AW033379 | AW932475 | DV171826 | DN216916 |
| BE521671 | AV560882 | AW033393 | BE458997 | DV172379 | DR796580 |
| BE521671 | AV561200 | AW033399 | AW032627 | DV172826 | DV512864 |
| BE521671 | AV561360 | AW033451 | AI486854 | DV172826 | DY537027 |
| BE521671 | AV561566 | AW033451 | AI771695 | DV173542 | DR792659 |
| BE521671 | AV563571 | AW033451 | AI897184 | DV173542 | DT641357 |
| BE521671 | AV564186 | AW033459 | BI421405 | DV173542 | DT647840 |
| BE521671 | AV564379 | AW033486 | AW030367 | DV173542 | DV032550 |
| BE521671 | AV564788 | AW033487 | AW932475 | DV173542 | EE180961 |
| BE521671 | AV567160 | AW033511 | BG127378 | DV173994 | DR954479 |
| BE521671 | AV567577 | AW033535 | AW034261 | DV174012 | DY690515 |
| BE521671 | BE520292 | AW033586 | AI486469 | DV174713 | DR826282 |



|          |          |          |          |          |          |
|----------|----------|----------|----------|----------|----------|
| BE521671 | BE522484 | AW033591 | AW033793 | DV174713 | EE295023 |
| BE521671 | BE522719 | AW033606 | AW033678 | DV502202 | DN229595 |
| BE521727 | AV564379 | AW033606 | AW033793 | DV502364 | DR823961 |
| BE521727 | BE522719 | AW033659 | BG127378 | DV502364 | DT650532 |
| BE521833 | BE521655 | AW033678 | AW030367 | DV502364 | DY530554 |
| BE521833 | BE527565 | AW033683 | BG135231 | DV502364 | EE019606 |
| BE521960 | AI100565 | AW033686 | AW031705 | DV502824 | EE176718 |
| BE521961 | BE520358 | AW033687 | AW030141 | DV503920 | DR812391 |
| BE521961 | T45952   | AW033761 | AW033793 | DV504019 | DY536008 |
| BE522017 | AV526335 | AW033770 | AW030367 | DV504100 | DV502485 |
| BE522198 | T45952   | AW033770 | AW033793 | DV504237 | DR971284 |
| BE522509 | T45952   | AW033793 | AW030367 | DV504349 | EB820490 |
| BE522557 | T45574   | AW033810 | BI421720 | DV505113 | DV510221 |
| BE522557 | T45952   | AW033812 | BG643997 | DV505286 | DV514906 |
| BE522679 | T45574   | AW033819 | AW036020 | DV506103 | CO52056  |
| BE522679 | T45952   | AW033829 | AW030121 | DV506103 | CO53115  |
| BE522684 | BE525837 | AW033834 | AW030367 | DV506103 | DR805855 |
| BE522861 | BE520358 | AW033834 | AW033678 | DV506297 | CO52215  |
| BE522974 | BE520309 | AW033834 | AW033793 | DV506487 | DN217096 |
| BE522974 | BE521061 | AW033865 | AW031841 | DV507651 | DR802228 |
| BE522974 | BE521518 | AW033873 | AW030141 | DV508261 | DT942139 |
| BE522974 | BE524240 | AW033905 | AW621240 | DV508625 | EE288780 |
| BE523070 | BE527613 | AW033928 | AW219292 | DV508645 | EB820490 |
| BE523132 | AV528428 | AW033939 | AI483415 | DV509882 | EE046626 |
| BE523132 | AV529411 | AW033939 | BI922975 | DV510282 | DV163312 |
| BE523132 | AV529622 | AW033964 | AW030367 | DV510294 | EB820490 |
| BE523273 | T45574   | AW033964 | AW033678 | DV510341 | AI491498 |
| BE523273 | T45952   | AW034004 | AW033793 | DV511246 | DT945813 |
| BE523323 | T45952   | AW034026 | AW031841 | DV511389 | EC905543 |
| BE523324 | BE520358 | AW034037 | AW030129 | DV511495 | BM07475  |
| BE523366 | T45952   | AW034100 | AW034756 | DV511695 | DV167686 |
| BE523468 | BE520358 | AW034129 | AW030367 | DV512443 | DV163393 |
| BE523473 | T45574   | AW034129 | AW033678 | DV512890 | DY689886 |
| BE523473 | T45952   | AW034141 | AW030367 | DV513212 | EE289291 |
| BE523550 | CK120349 | AW034155 | AW035342 | DV513317 | EE289802 |
| BE523550 | CK120521 | AW034177 | AW621917 | DV513460 | DY689063 |
| BE523673 | T45574   | AW034196 | AW030133 | DV513840 | DN204788 |
| BE523673 | T45952   | AW034228 | AW033793 | DV513840 | DN224109 |
| BE523786 | BE521655 | AW034236 | AI485987 | DV514009 | DR789739 |
| BE523944 | BE520358 | AW034252 | AW030367 | DV514590 | DV530154 |
| BE523959 | BE522852 | AW034253 | AW033514 | DV514687 | EC905273 |
| BE523959 | BE523500 | AW034262 | AI897978 | DV514737 | EC902022 |
| BE523959 | BE527327 | AW034267 | AI490147 | DV514868 | EE291524 |
| BE523959 | BE528409 | AW034309 | AW030367 | DV515593 | DR811203 |
| BE523959 | BE528440 | AW034309 | AW033793 | DV515709 | EC902801 |
| BE524097 | T45330   | AW034310 | AW030367 | DV516140 | EB642359 |
| BE524104 | BE521502 | AW034310 | AW033678 | DV516359 | EB159057 |
| BE524137 | BE521502 | AW034310 | AW033793 | DV516848 | DV525272 |
| BE524175 | T45574   | AW034312 | AW034302 | DV517053 | EB706563 |
| BE524175 | T45952   | AW034330 | AW030141 | DV517922 | EE161058 |
| BE524201 | CK120349 | AW034374 | AW030367 | DV518468 | DV025611 |
| BE524201 | CK120521 | AW034374 | AW033678 | DV519410 | DY238754 |

|          |          |          |          |          |          |
|----------|----------|----------|----------|----------|----------|
| BE524208 | T45952   | AW034374 | AW033793 | DV519850 | DV020780 |
| BE524292 | N37229   | AW034375 | AW030367 | DV520569 | DV511993 |
| BE524305 | BE520358 | AW034375 | AW033678 | DV521582 | DV021639 |
| BE524305 | T45952   | AW034375 | AW033793 | DV521795 | EE171085 |
| BE524313 | AV537202 | AW034446 | AW737196 | DV522066 | EE171085 |
| BE524313 | BE038167 | AW034478 | AW033678 | DV523288 | DV024288 |
| BE524390 | BE520358 | AW034478 | AW033793 | DV523288 | DV534765 |
| BE524483 | T45952   | AW034530 | AW031841 | DV523288 | EB822239 |
| BE524546 | BE520358 | AW034548 | AI486469 | DV523288 | EE187389 |
| BE524775 | BE520358 | AW034555 | AW218707 | DV523516 | EE288780 |
| BE525187 | BE520358 | AW034567 | AI894888 | DV523810 | EB166860 |
| BE525212 | T76456   | AW034572 | AW738352 | DV524251 | EE181044 |
| BE525350 | T45952   | AW034584 | AW033793 | DV524419 | CD568729 |
| BE525473 | T45574   | AW034615 | AW932475 | DV524944 | DV025611 |
| BE525473 | T45952   | AW034632 | AW030367 | DV526134 | DR829443 |
| BE525572 | T45952   | AW034632 | AW033678 | DV526260 | DR792343 |
| BE525574 | T45952   | AW034645 | AW031841 | DV526358 | DR803561 |
| BE525742 | W43696   | AW034729 | AW030141 | DV526744 | DV528500 |
| BE525792 | BE525925 | AW034742 | AW033793 | DV526780 | EB818702 |
| BE525792 | T44280   | AW034753 | BE459712 | DV527029 | DV515249 |
| BE525844 | BE039250 | AW034783 | AW030367 | DV527715 | DR955577 |
| BE526930 | AV528428 | AW034821 | BE449687 | DV527760 | CB331540 |
| BE526930 | AV529411 | AW034842 | AI486854 | DV528425 | DR958676 |
| BE526930 | AV529622 | AW034842 | AI487123 | DV529340 | DR793358 |
| BE527183 | BE526795 | AW034842 | AI897379 | DV530505 | DR818760 |
| BE527264 | BE521502 | AW034842 | AI897932 | DV530608 | DT941149 |
| BE527264 | BE525532 | AW034880 | AW932660 | DV530667 | DY530601 |
| BE527264 | BE528409 | AW034887 | BI421964 | DV530680 | EC881836 |
| BE527264 | BE528440 | AW034888 | AW932475 | DV531000 | DN216490 |
| BE527264 | BE530841 | AW034960 | AI489351 | DV531949 | DV515427 |
| BE527325 | BE529092 | AW035008 | AW033678 | DV531949 | DY238622 |
| BE527928 | AV527817 | AW035008 | AW033793 | DV531949 | EB406823 |
| BE529450 | N37229   | AW035059 | AW030367 | DV532523 | DR793657 |
| BE529655 | AV553769 | AW035059 | AW033678 | DV532523 | DY687952 |
| BE530576 | BE526795 | AW035059 | AW033793 | DV532917 | DV518868 |
| BE662939 | BE662927 | AW035090 | AW033793 | DV533007 | CO51814  |
| BG459260 | T20959   | AW035155 | AW033678 | DV533165 | DT647301 |
| BG459260 | T44507   | AW035160 | AW033793 | DV533353 | EB159057 |
| BU635044 | AA042503 | AW035168 | AI489351 | DV534026 | EC875510 |
| BU635044 | AV442676 | AW035169 | AW030367 | DV534861 | DN213284 |
| BU635044 | AV528508 | AW035172 | AI486978 | DV535706 | DN223749 |
| BU635044 | AV529571 | AW035192 | BE450829 | DV536114 | DR805113 |
| BU635044 | BE522340 | AW035235 | AW033793 | DV536225 | DR812976 |
| BU635044 | BU635211 | AW035245 | AW034261 | DV537570 | DR817715 |
| BU635044 | BU635337 | AW035270 | AW030367 | DV537570 | DR961655 |
| BU635044 | BU635411 | AW035370 | AI488251 | DV537570 | EC905519 |
| BU635044 | BU635889 | AW035370 | AI490147 | DV537570 | EE010863 |
| BU635044 | BU636469 | AW035386 | BI423139 | DV537715 | DT944312 |
| BU635044 | BU636566 | AW035410 | AW030367 | DV538465 | CO52272  |
| BU635044 | BU636723 | AW035485 | AW031841 | DV538502 | EE046626 |
| BU635044 | BU636794 | AW035486 | AW033793 | DV539024 | DT651801 |
| BU635044 | CA781442 | AW035512 | AW932475 | DV539024 | EB407905 |

|          |          |          |          |          |          |
|----------|----------|----------|----------|----------|----------|
| BU635044 | CA781822 | AW035531 | BI423371 | DV539897 | DR789627 |
| BU635044 | CK119084 | AW035531 | BI930973 | DV540064 | EE288780 |
| BU635126 | AV536908 | AW035531 | BI932124 | DV540411 | EE017236 |
| BU635259 | AV518006 | AW035564 | AW030367 | DV540498 | DY621588 |
| BU635259 | AV518176 | AW035581 | AW030409 | DV540697 | DR789689 |
| BU635259 | AV518259 | AW035592 | AW030367 | DV540697 | DR823248 |
| BU635259 | AV518343 | AW035595 | BI929362 | DV540697 | DV523975 |
| BU635259 | AV518565 | AW035662 | AW033678 | DV540697 | EB701164 |
| BU635259 | AV518597 | AW035679 | AI896372 | DV540697 | EE046542 |
| BU635259 | AV518675 | AW035692 | AI771695 | DV540697 | EE158729 |
| BU635297 | CK120521 | AW035692 | AI897379 | DV541045 | DR819979 |
| BU635371 | AA713044 | AW035692 | AI899310 | DV541114 | DV502076 |
| BU635371 | AV518146 | AW035701 | AI895612 | DV542253 | CD001136 |
| BU635371 | AV518565 | AW035704 | AW033678 | DV542253 | CD568425 |
| BU635371 | AV518675 | AW035704 | AW033793 | DV542253 | CO52961  |
| BU635371 | AV519058 | AW035764 | AW931564 | DV542253 | DV031971 |
| BU635371 | AV525650 | AW035779 | AW030367 | DV542615 | DV522794 |
| BU635371 | AV534468 | AW035795 | AW621240 | DV542725 | CO52709  |
| BU635371 | AV536579 | AW035809 | AW030367 | DV542725 | DY235285 |
| BU635389 | CK120349 | AW035820 | AW030141 | DV542725 | EC898375 |
| BU635389 | CK120521 | AW035828 | BI421964 | DV542725 | EE289873 |
| BU635750 | AV525605 | AW035840 | AW030367 | DV542981 | EB159057 |
| BU635952 | F19924   | AW035840 | AW033678 | DV543543 | EB406215 |
| BU635960 | CK120349 | AW035840 | AW033793 | DV543543 | EB639016 |
| BU636092 | CK121367 | AW035916 | AW030133 | DV543731 | EC881756 |
| BU636099 | AV518673 | AW035926 | AW036020 | DV544107 | DR798503 |
| BU636116 | AV524523 | AW035934 | AW217530 | DW46796  | DV025611 |
| BU636116 | N37640   | AW035955 | AI484035 | DW46849  | DR966412 |
| BU636172 | AA042713 | AW035993 | BI931939 | DW73282  | DW74380  |
| BU636172 | AV524676 | AW036010 | AW030133 | DW73880  | DW76880  |
| BU636172 | AV525494 | AW036227 | AW621406 | DW85041  | DW83914  |
| BU636172 | CA781131 | AW036322 | AW932370 | DW89964  | DN225794 |
| BU636172 | T42758   | AW036459 | AI777405 | DW91922  | DR968558 |
| BU636254 | Z47599   | AW036529 | AW036047 | DW93363  | BM34965  |
| BU636516 | AV545080 | AW036538 | AW036573 | DW95881  | CO52980  |
| BU636516 | AV555717 | AW036573 | BE458693 | DW97140  | DW91373  |
| BU636516 | CA781745 | AW036634 | BG713789 | DY232284 | DR797255 |
| BU636516 | CK117751 | AW154918 | AW033793 | DY232284 | DR804832 |
| BU636522 | BE521493 | AW216370 | AW030367 | DY232284 | DR824971 |
| BU636588 | CK120349 | AW216376 | AW030367 | DY232284 | DR969773 |
| BU636647 | T46405   | AW216376 | AW033678 | DY232284 | DT640470 |
| BU636702 | CK120521 | AW216376 | AW033793 | DY232284 | DT641622 |
| BU636744 | AV538017 | AW216377 | AI483457 | DY232284 | DT650158 |
| BU636766 | CK120496 | AW216384 | AW033678 | DY232403 | DR958676 |
| BU636817 | DR750695 | AW216391 | AI487972 | DY233032 | DV021639 |
| BU636817 | N37775   | AW216392 | AI894423 | DY233056 | EE016183 |
| CA781466 | AV520098 | AW216392 | AW031013 | DY233790 | DN223749 |
| CA781466 | AV520911 | AW216402 | AW030367 | DY233989 | DR793300 |
| CA781466 | BU635617 | AW216402 | AW033678 | DY233989 | EC892217 |
| CA781466 | CK120604 | AW216402 | AW033793 | DY234684 | DR799708 |
| CA781466 | H37342   | AW216437 | AW033678 | DY234684 | DV507487 |
| CA781474 | AA404746 | AW216441 | AW030367 | DY235324 | DR794476 |

|          |          |          |          |          |          |
|----------|----------|----------|----------|----------|----------|
| CA781548 | CK120349 | AW216441 | AW033678 | DY235845 | DV028734 |
| CA781569 | BE038167 | AW216441 | AW033793 | DY235845 | DV032065 |
| CA781709 | CK120349 | AW216454 | AW033119 | DY235845 | EB705012 |
| CA781808 | CK120349 | AW216469 | AW031841 | DY235976 | DR958981 |
| CA781808 | CK120521 | AW216482 | AW649022 | DY236046 | DY687161 |
| CA781858 | AV524555 | AW216487 | AW030121 | DY236539 | DR956599 |
| CA781858 | AV524565 | AW216496 | AW030367 | DY236539 | DY536082 |
| CA781858 | AV524573 | AW216496 | AW033678 | DY236879 | BQ538479 |
| CA781858 | AV525120 | AW216496 | AW033793 | DY236879 | DV523233 |
| CA781858 | AV550224 | AW216506 | AW030367 | DY237877 | DR964590 |
| CA781858 | AV551194 | AW216506 | AW033793 | DY237941 | EE035845 |
| CA781858 | BE528003 | AW216517 | AI487693 | DY238029 | DR790876 |
| CA781858 | CK117517 | AW216517 | AI488758 | DY238059 | EB400250 |
| CA781858 | CK119324 | AW216517 | BI423089 | DY238065 | DV024288 |
| CA781858 | R30061   | AW216553 | AW031841 | DY238065 | DV534765 |
| CA781899 | CK120349 | AW216585 | AW030367 | DY238065 | EB822239 |
| CA963981 | CK120303 | AW216585 | AW033678 | DY238065 | EE187389 |
| CB074188 | AV524835 | AW216585 | AW033793 | DY238147 | CF649766 |
| CB074235 | Z29903   | AW216609 | AW030367 | DY238795 | EE040879 |
| CB074333 | R29772   | AW216637 | AW030367 | DY239025 | DV522794 |
| CB074566 | AV544015 | AW216725 | AW030377 | DY239094 | CF647286 |
| CB185710 | T43346   | AW216768 | AW033678 | DY239151 | DR812828 |
| CB518287 | N38434   | AW216770 | AW932475 | DY239906 | EB637733 |
| CB518287 | T75625   | AW216787 | AW031841 | DY240316 | EE042510 |
| CK117529 | CK120349 | AW216834 | AI489351 | DY240648 | EE292753 |
| CK117529 | CK120521 | AW216840 | AW030367 | DY240845 | DR814990 |
| CK117566 | CK120521 | AW216871 | BG133618 | DY241190 | DN210835 |
| CK117603 | CK121367 | AW216879 | AW030121 | DY241628 | DT643658 |
| CK117640 | CK121367 | AW216902 | AW031841 | DY241634 | DR819471 |
| CK117730 | CK120349 | AW216920 | AI486854 | DY241634 | DR831385 |
| CK117760 | CK120349 | AW216920 | AI771695 | DY530352 | EC875510 |
| CK117768 | CK121367 | AW216920 | AI897184 | DY530574 | DR792343 |
| CK117876 | AV520531 | AW216920 | AI897854 | DY531332 | CO53347  |
| CK117889 | CK120349 | AW216920 | AI897932 | DY531332 | DR966613 |
| CK117918 | CK120521 | AW216920 | AI899010 | DY531332 | DV164354 |
| CK117936 | CK121367 | AW216920 | AI899310 | DY531332 | DV502424 |
| CK117939 | CK120349 | AW216920 | BF050996 | DY531366 | DR805113 |
| CK117959 | BE039250 | AW216920 | BF051033 | DY531430 | DT943903 |
| CK117960 | CK121367 | AW216940 | BE441067 | DY532089 | DT647301 |
| CK117987 | CK118055 | AW216943 | AW030367 | DY533728 | CO51783  |
| CK117997 | CK120083 | AW216943 | AW033678 | DY534217 | EE186457 |
| CK117997 | R29772   | AW216943 | AW033793 | DY534261 | EB703238 |
| CK118172 | CK121974 | AW216952 | AI895989 | DY534781 | DN231493 |
| CK118185 | CK120349 | AW216952 | AW032893 | DY535424 | DV523564 |
| CK118185 | CK120521 | AW216952 | AW648571 | DY536362 | CO53109  |
| CK118199 | CK120349 | AW216952 | BI422338 | DY539412 | CF649499 |
| CK118199 | CK120521 | AW216986 | AW030367 | DY540172 | EB408815 |
| CK118273 | CK121367 | AW216992 | AW030367 | DY540186 | DR818760 |
| CK118276 | CK120349 | AW217000 | AW033678 | DY540541 | DN212230 |
| CK118322 | CK120083 | AW217013 | AW030141 | DY540656 | DV511248 |
| CK118512 | CK120349 | AW217031 | AW030367 | DY540656 | EB167103 |
| CK118512 | CK120521 | AW217050 | AW033678 | DY540713 | DR973000 |

|          |          |          |          |          |          |
|----------|----------|----------|----------|----------|----------|
| CK118529 | CK121367 | AW217102 | AW033678 | DY540991 | DY689421 |
| CK118531 | CK120349 | AW217102 | AW033793 | DY541436 | DR812828 |
| CK118531 | CK120521 | AW217115 | AW033793 | DY541501 | EC875510 |
| CK118533 | CK121367 | AW217144 | AI485787 | DY541898 | DV172619 |
| CK118576 | CK121367 | AW217148 | AW033678 | DY541958 | EB674169 |
| CK118624 | CK120521 | AW217155 | AI895100 | DY619738 | EB162871 |
| CK118625 | CK120349 | AW217155 | AI896627 | DY620199 | EE020466 |
| CK118625 | CK120521 | AW217191 | AW033678 | DY620390 | DV025611 |
| CK118701 | CK120349 | AW217195 | AW030367 | DY620451 | DV024288 |
| CK118734 | BE524083 | AW217197 | AW032627 | DY620451 | DV534765 |
| CK118800 | CK120521 | AW217204 | AW030367 | DY620451 | EB822239 |
| CK118810 | BE521815 | AW217208 | AI486872 | DY620451 | EE187389 |
| CK118816 | CK120349 | AW217248 | AI488810 | DY620791 | DV167722 |
| CK118816 | CK120521 | AW217254 | AW033678 | DY620954 | EE189736 |
| CK118832 | CK121974 | AW217254 | AW033793 | DY621438 | DV523060 |
| CK118873 | CK120349 | AW217259 | AW030367 | DY621597 | DR958676 |
| CK118883 | CK120349 | AW217284 | BG125022 | DY622459 | EB642923 |
| CK118883 | CK120521 | AW217383 | AW651399 | DY622755 | BG550209 |
| CK118986 | CK121367 | AW217503 | AW647917 | DY622985 | DV524977 |
| CK119001 | CK120349 | AW217518 | BG130131 | DY623068 | EE022445 |
| CK119005 | CK120349 | AW217551 | BI927521 | DY623309 | EE162252 |
| CK119005 | CK120521 | AW217616 | AI485051 | DY623790 | DY621588 |
| CK119032 | CK120349 | AW217616 | AI489351 | DY623806 | DR829631 |
| CK119032 | CK120521 | AW217622 | AI896289 | DY623806 | DV167263 |
| CK119035 | CK120349 | AW217622 | BI929117 | DY623806 | DV529739 |
| CK119035 | CK120521 | AW217662 | AW623185 | DY623806 | EE041184 |
| CK119042 | CK120349 | AW217683 | AI489351 | DY685441 | DT646784 |
| CK119042 | CK120521 | AW217804 | AW738668 | DY685583 | DN223294 |
| CK119051 | CK120349 | AW217820 | AW622742 | DY685583 | EB638148 |
| CK119056 | CK120349 | AW217820 | AW648800 | DY685970 | DT946711 |
| CK119056 | CK120521 | AW217821 | AW622742 | DY686030 | EB673160 |
| CK119079 | CK120349 | AW217821 | AW648800 | DY686030 | EC883857 |
| CK119079 | CK120521 | AW217822 | AI897345 | DY686899 | DT647595 |
| CK119101 | CK120349 | AW217942 | BI929437 | DY689179 | CO52758  |
| CK119101 | CK120521 | AW217967 | BE451023 | DY689332 | DR968483 |
| CK119123 | CK121367 | AW218049 | AW624082 | DY689332 | EE016402 |
| CK119177 | CK121974 | AW218050 | AW624082 | DY689873 | DR972912 |
| CK119219 | AV537679 | AW218077 | AW031854 | DY690108 | EE184766 |
| CK119219 | CK120354 | AW218077 | BI927984 | DY690140 | DR821444 |
| CK119258 | CK121367 | AW218143 | AW625615 | DY690140 | DR965154 |
| CK119282 | CK121367 | AW218162 | AW218629 | DY690140 | EE155560 |
| CK119355 | CK119737 | AW218406 | AW929621 | DY690140 | EE177625 |
| CK119422 | CK120349 | AW218492 | BI925878 | EB158739 | EC885433 |
| CK119449 | CB035518 | AW218527 | BG131715 | EB158836 | EE027419 |
| CK119481 | CK120521 | AW218537 | AI485051 | EB159407 | DY688961 |
| CK119498 | CK120349 | AW218537 | AI489351 | EB159571 | DV022169 |
| CK119498 | CK120521 | AW218551 | BG129184 | EB160350 | CF649499 |
| CK119524 | CK121367 | AW218551 | BI423355 | EB160408 | CO52842  |
| CK119613 | AV533895 | AW218551 | BI924624 | EB160634 | DR801931 |
| CK119622 | CK119737 | AW218551 | BI932634 | EB160931 | EE018382 |
| CK119626 | BE039250 | AW218667 | BI423355 | EB161073 | DR971827 |
| CK119640 | CK120349 | AW218667 | BI932634 | EB161479 | DV532432 |

|          |          |          |          |          |          |
|----------|----------|----------|----------|----------|----------|
| CK119641 | CK120349 | AW218723 | AW622246 | EB161744 | DR819913 |
| CK119641 | CK120521 | AW218734 | AW621199 | EB161956 | CO52619  |
| CK119658 | AV554207 | AW218760 | BF176526 | EB161991 | DN228281 |
| CK119674 | CK120349 | AW218830 | AW621216 | EB162112 | CD670250 |
| CK119674 | CK120521 | AW218831 | AW621216 | EB162607 | EB639385 |
| CK119694 | CK121367 | AW218862 | AW621199 | EB162733 | DR958676 |
| CK119728 | CK120896 | AW218888 | BG713789 | EB162871 | DV173343 |
| CK119730 | CK121367 | AW218899 | AW621226 | EB163036 | DR802309 |
| CK119788 | CK119737 | AW218957 | BI923037 | EB163064 | DN213041 |
| CK119808 | CK120349 | AW218958 | BE353644 | EB163220 | DV163312 |
| CK119808 | CK120521 | AW218967 | AW224679 | EB163443 | EC902728 |
| CK119820 | AV520531 | AW218967 | AW621864 | EB163914 | DV521277 |
| CK119828 | CK120349 | AW218967 | AW979976 | EB164396 | DN205804 |
| CK119842 | CK120349 | AW218967 | BI421759 | EB164477 | DR970589 |
| CK119842 | CK120521 | AW218977 | AW929645 | EB165240 | EE286991 |
| CK119852 | CK120349 | AW218977 | BE450946 | EB165762 | EE185246 |
| CK119854 | CK120349 | AW218977 | BG642581 | EB165921 | EC904752 |
| CK119860 | CK120349 | AW218982 | BG135665 | EB165921 | EE153530 |
| CK119860 | CK120521 | AW218987 | BG713789 | EB166127 | EE189461 |
| CK119868 | CK120349 | AW219005 | AI486872 | EB166372 | DV024909 |
| CK119899 | CK120349 | AW219014 | BE441067 | EB166502 | EE289782 |
| CK119943 | CK119737 | AW219045 | BE458997 | EB167090 | DR811735 |
| CK119955 | CK120349 | AW219108 | AI486872 | EB167349 | EE031390 |
| CK120011 | CK121367 | AW219115 | AI489351 | EB167490 | DV020780 |
| CK120013 | AA042608 | AW219127 | AI489351 | EB167572 | DN223247 |
| CK120017 | CK120349 | AW219141 | AI489215 | EB399835 | EB166506 |
| CK120044 | CK121367 | AW219141 | AI489256 | EB399922 | BM33858  |
| CK120083 | BE520350 | AW219141 | AI771119 | EB399922 | BM34849  |
| CK120145 | CK120349 | AW219141 | AW030874 | EB401525 | DV163393 |
| CK120145 | CK120521 | AW219141 | AW218735 | EB403329 | DY532351 |
| CK120191 | CK119737 | AW219141 | AW622553 | EB403353 | DV505007 |
| CK120191 | CK121367 | AW219141 | AW933551 | EB403700 | DV504381 |
| CK120288 | CK121367 | AW219141 | BE451185 | EB403923 | DV511248 |
| CK120297 | CK120521 | AW219141 | BF052211 | EB404142 | DR962929 |
| CK120310 | CK121367 | AW219141 | BG135132 | EB404142 | DY618767 |
| CK120326 | CK121367 | AW219141 | BG642842 | EB404142 | EC887656 |
| CK120357 | CK121367 | AW219141 | BI422676 | EB404142 | EE033886 |
| CK120362 | CK120896 | AW219143 | AW030367 | EB404142 | EE286490 |
| CK120414 | CK120521 | AW219143 | AW033678 | EB404268 | CO52816  |
| CK120558 | CK120349 | AW219143 | AW033793 | EB404292 | BG842615 |
| CK120559 | CK120349 | AW219149 | BI922542 | EB404627 | DY689130 |
| CK120570 | CK121367 | AW219149 | BI922900 | EB404703 | DV171660 |
| CK120615 | CK120521 | AW219149 | BI923440 | EB404951 | DV025611 |
| CK120661 | CK120349 | AW219194 | BE458997 | EB405700 | DV536047 |
| CK120661 | CK120521 | AW219205 | AW932475 | EB406278 | DV537161 |
| CK120664 | CK120349 | AW219322 | BG642629 | EB406418 | EE185577 |
| CK120671 | CK120349 | AW219324 | AI485051 | EB406581 | DV519700 |
| CK120671 | CK120696 | AW219324 | AI489351 | EB406581 | DY232263 |
| CK120675 | AV532481 | AW219352 | BG713789 | EB406685 | EE183256 |
| CK120675 | AV533431 | AW219371 | BG713789 | EB406758 | DR958676 |
| CK120675 | CK117584 | AW219434 | AW219305 | EB406952 | CO52835  |
| CK120675 | CK118846 | AW219523 | AW648087 | EB406952 | DR818374 |

|          |          |          |          |          |          |
|----------|----------|----------|----------|----------|----------|
| CK120675 | Z29852   | AW219523 | AW944911 | EB406952 | DV021914 |
| CK120698 | CK120349 | AW219523 | BG134418 | EB408165 | DT653746 |
| CK120698 | CK120696 | AW219633 | BG713789 | EB408284 | EE017775 |
| CK120705 | CK120521 | AW219636 | BG713789 | EB408614 | DR826546 |
| CK120713 | CK120349 | AW219640 | AW219110 | EB637333 | DR791602 |
| CK120713 | CK120521 | AW219640 | AW621378 | EB637579 | DR826282 |
| CK120745 | CK121367 | AW219640 | AW930553 | EB637579 | EE295023 |
| CK120772 | AV552502 | AW219640 | BG123775 | EB637656 | DR815972 |
| CK120785 | AV441150 | AW219640 | BI922203 | EB637656 | EE021793 |
| CK120793 | AV441150 | AW219959 | AI483457 | EB638506 | CD568794 |
| CK120815 | CK120349 | AW219960 | AI483457 | EB638506 | DY530705 |
| CK120821 | CK121367 | AW219971 | BG713789 | EB639094 | DV020780 |
| CK120838 | AV535597 | AW219998 | BG713789 | EB639375 | BM26733  |
| CK120838 | AV564292 | AW219999 | BG713789 | EB639630 | DV163757 |
| CK120838 | AV566902 | AW220035 | BG134639 | EB639922 | DN209837 |
| CK120838 | BE038017 | AW220060 | BI932608 | EB639922 | DR824934 |
| CK120838 | BU636425 | AW220068 | BG643997 | EB639922 | DV511366 |
| CK120838 | CK117983 | AW220071 | AW218549 | EB640089 | DR958122 |
| CK120838 | CK119152 | AW220071 | BI924702 | EB640489 | DR819448 |
| CK120838 | CK119662 | AW220106 | BI933276 | EB640596 | EB704617 |
| CK120838 | CK119936 | AW220124 | AW737933 | EB640763 | DT650744 |
| CK120862 | CK120349 | AW220128 | AI485051 | EB640920 | EC892662 |
| CK120879 | CK120349 | AW220128 | AI489351 | EB642098 | DV020780 |
| CK120879 | CK120521 | AW220398 | AI489351 | EB642406 | DN216490 |
| CK121007 | CK120349 | AW220419 | AI489351 | EB642453 | DN232863 |
| CK121007 | CK120521 | AW220474 | BG125071 | EB642748 | DT948133 |
| CK121037 | CK120696 | AW220492 | AW932475 | EB674123 | DR796138 |
| CK121060 | T45330   | AW220493 | AW932475 | EB674723 | DV510166 |
| CK121137 | CK121974 | AW220494 | AW932475 | EB675493 | BG841408 |
| CK121214 | AV537202 | AW220574 | AI486189 | EB675493 | BM34965  |
| CK121214 | BE038167 | AW220748 | BG713789 | EB675799 | BG842322 |
| CK121225 | CK121974 | AW220762 | AW648087 | EB676141 | CO52597  |
| CK121232 | CK121367 | AW220762 | AW944911 | EB676304 | DV021012 |
| CK121273 | CK119737 | AW220762 | BG134418 | EB676304 | EE293956 |
| CK121343 | AV540778 | AW220765 | BI926740 | EB676505 | DR969873 |
| CK121350 | CK120349 | AW220765 | BI931849 | EB676642 | DY540336 |
| CK121350 | CK120521 | AW220821 | AW649565 | EB676711 | DN233070 |
| CK121412 | CK120521 | AW220880 | BF052092 | EB676737 | DR972104 |
| CK121441 | CK121974 | AW220905 | BG713789 | EB701213 | DR797881 |
| CK121473 | AV533431 | AW220996 | AW033884 | EB701251 | BM26748  |
| CK121473 | CK118846 | AW221035 | BG133249 | EB701343 | EB408986 |
| CK121473 | Z29852   | AW221064 | BG713789 | EB701358 | DR800838 |
| CK121503 | CK121974 | AW221125 | AI484678 | EB701358 | DR816017 |
| CK121637 | AV520121 | AW221125 | AW649513 | EB701358 | DT651274 |
| CK121637 | CK121971 | AW221134 | AI489351 | EB701358 | DV020443 |
| CK121754 | AV441894 | AW221140 | AI489351 | EB701358 | EC886148 |
| CK121756 | CK120349 | AW221154 | BI928753 | EB702461 | DN230000 |
| CK121776 | CK120349 | AW221169 | BG135524 | EB702724 | DV503810 |
| CK121791 | CK120349 | AW221174 | AI484883 | EB702981 | DY233134 |
| CK121791 | CK120521 | AW221177 | AI489351 | EB703074 | DV029760 |
| CK121793 | CK120521 | AW221215 | AW647837 | EB703166 | EE162844 |
| CK121805 | CK120349 | AW221221 | BG124906 | EB703522 | DR968483 |

|          |          |          |          |          |          |
|----------|----------|----------|----------|----------|----------|
| CK121805 | CK120521 | AW221229 | BG128078 | EB703522 | DT946992 |
| CK121805 | CK120696 | AW221233 | BI928753 | EB703522 | DV169437 |
| CK121823 | AV533431 | AW221321 | BI935229 | EB703522 | EE016402 |
| CK121823 | CK118846 | AW221327 | BI926695 | EB703623 | CO52709  |
| CK121823 | Z29852   | AW221350 | AI489351 | EB703623 | DY235285 |
| CK121851 | BE038890 | AW221383 | AI489351 | EB703623 | EC898375 |
| CK121882 | N37229   | AW221384 | AI489351 | EB703623 | EE289873 |
| CK121961 | CK119737 | AW221403 | BG713789 | EB703745 | EB642981 |
| CK122006 | CK120349 | AW221425 | BG713789 | EB703773 | DV531144 |
| CK716359 | CK120349 | AW221440 | AW933100 | EB704598 | DV507026 |
| DN604459 | BE523098 | AW221440 | AW934183 | EB704741 | EC897209 |
| DN604663 | BE521632 | AW429025 | BE450744 | EB706026 | DT641836 |
| DR749984 | AV553165 | AW429211 | BI930186 | EB706050 | DV027964 |
| DR750082 | DN604590 | AW429222 | AW928772 | EB706189 | CF244232 |
| DR750548 | DR749819 | AW429222 | BF052083 | EB706189 | DT945097 |
| DR750732 | DR750712 | AW429222 | BI935945 | EB706189 | DV517862 |
| DR750740 | AV532232 | AW455240 | AI485051 | EB706189 | EB674109 |
| DR750801 | DR750539 | AW455240 | AI489351 | EB706189 | EB819395 |
| DR751026 | T88346   | AW455287 | AI487990 | EB706734 | EE293888 |
| DR751027 | T42666   | AW455287 | AW029807 | EB707438 | CB816102 |
| DR751109 | DR751486 | AW455287 | AW036502 | EB707751 | DT944312 |
| DR751518 | H36546   | AW455287 | AW625579 | EB707844 | DR798952 |
| H36012   | CK120349 | AW455287 | AW929579 | EB707844 | DR959791 |
| H36070   | BE520350 | AW455287 | BG126373 | EB707844 | EB160716 |
| H36170   | H37467   | AW455287 | BG643709 | EB708683 | DV530711 |
| H36170   | W43148   | AW455287 | BI931521 | EB708813 | DV163393 |
| H36224   | AV525401 | AW455316 | AW034756 | EB708813 | DY623754 |
| H36224   | N97259   | AW455335 | AI482811 | EB813189 | DV165843 |
| H36224   | T04213   | AW615850 | BI932634 | EB814318 | DR812094 |
| H37140   | CK120349 | AW615887 | AI491196 | EB814318 | EB676702 |
| H37140   | CK120521 | AW615994 | AW220883 | EB814493 | EB405177 |
| H37233   | CK120349 | AW615994 | AW945032 | EB815264 | DR798102 |
| H37233   | CK120521 | AW615999 | AW944950 | EB815264 | EB164310 |
| H37243   | CK120349 | AW616012 | BI921785 | EB815436 | DV511536 |
| H37243   | CK120521 | AW616037 | BG129317 | EB815546 | DR814990 |
| H37248   | AV527466 | AW621205 | AW625367 | EB816094 | DV027964 |
| H37253   | T13712   | AW621273 | AI486978 | EB817190 | EE293001 |
| H37595   | CK120349 | AW621280 | BG127681 | EB817341 | DY238754 |
| H37595   | CK120521 | AW621298 | BG713789 | EB817710 | EB166413 |
| H75996   | AV537202 | AW621369 | BG129634 | EB817804 | DR825687 |
| H75996   | BE038167 | AW621369 | BG642629 | EB817804 | DT940601 |
| H76046   | T13880   | AW621434 | AW929645 | EB817804 | EB637569 |
| H76067   | AA395870 | AW621434 | BE450946 | EB817980 | DT649496 |
| H76397   | T13880   | AW621434 | BG642581 | EB818007 | CB885395 |
| H76437   | AV536742 | AW621434 | BI932071 | EB818009 | CO52100  |
| H76438   | AV536742 | AW621526 | AI489351 | EB818074 | EE175940 |
| H76501   | BE522902 | AW621544 | AW934354 | EB818585 | DV033586 |
| H77123   | CK120349 | AW621615 | AI485051 | EB818945 | DR788776 |
| H77144   | BE525231 | AW621615 | AI489351 | EB819643 | DR973000 |
| H77155   | CK120349 | AW621626 | AI485051 | EB819852 | EE041640 |
| H77155   | CK120521 | AW621626 | AI489351 | EB821845 | DR786753 |
| H77222   | T46405   | AW621747 | AI485051 | EB822116 | EE033482 |



|        |          |          |          |          |          |
|--------|----------|----------|----------|----------|----------|
| H77243 | AV536742 | AW621747 | AI489351 | EB822207 | DV026746 |
| H77243 | T13718   | AW621762 | BG125436 | EB822319 | DV511993 |
| N37301 | CK120349 | AW621789 | AI489351 | EB822321 | EC897499 |
| N37504 | AV536742 | AW621815 | AI489351 | EC872258 | EE189559 |
| N37504 | BE038931 | AW621827 | AI486729 | EC872691 | EE167004 |
| N37504 | CA782052 | AW621827 | AI487087 | EC872853 | EE048535 |
| N37562 | CK120521 | AW621827 | AI489490 | EC873042 | EE040883 |
| N37685 | BE525865 | AW621827 | AI894882 | EC873048 | EC894420 |
| N37769 | CK120521 | AW621827 | AW036659 | EC873084 | EE180392 |
| N37788 | CK120349 | AW621827 | AW934414 | EC873249 | EE042798 |
| N37788 | CK120521 | AW621827 | BE353421 | EC873316 | EE041779 |
| N37842 | T13880   | AW621827 | BE462171 | EC873316 | EE155422 |
| N37991 | BE039250 | AW621827 | BG127303 | EC873323 | EE171782 |
| N38067 | CK120349 | AW621827 | BI923765 | EC873353 | EE025336 |
| N38117 | CK120521 | AW621827 | BI923771 | EC873359 | EC888785 |
| N38126 | AV441623 | AW621827 | BI928769 | EC873402 | EC898820 |
| N38145 | CK120349 | AW621827 | BI930883 | EC873557 | EC899915 |
| N38145 | CK120521 | AW621844 | AI482763 | EC873570 | EE156800 |
| N38526 | CK120349 | AW621844 | BG133242 | EC873593 | BG354531 |
| N38526 | CK120521 | AW621849 | BF114095 | EC873616 | DT946590 |
| N38527 | CK120349 | AW621886 | AW944911 | EC873707 | EE175713 |
| N38676 | N65013   | AW621895 | AW623185 | EC873732 | EE285537 |
| N65053 | CK120521 | AW621931 | AW220017 | EC873956 | EE163655 |
| N65086 | CK119737 | AW621931 | AW621198 | EC873990 | EE032307 |
| N65102 | BE038890 | AW621931 | AW622012 | EC874022 | EE160299 |
| N65164 | CK120349 | AW621931 | AW626302 | EC874358 | EE029323 |
| N65164 | CK120521 | AW621940 | AW622246 | EC874793 | EE190306 |
| N65304 | CK119737 | AW621947 | AI489351 | EC874809 | EE285480 |
| N65698 | BE038890 | AW621948 | BG129634 | EC874816 | EE179298 |
| N65777 | AV537202 | AW621948 | BG642629 | EC874940 | EE190230 |
| N65777 | BE038167 | AW622028 | AW031841 | EC874947 | EE188526 |
| N65889 | T44766   | AW622071 | BG129634 | EC875045 | EE031527 |
| N96584 | AA042608 | AW622071 | BG132021 | EC875178 | EE184637 |
| N96920 | AV439889 | AW622123 | AI485051 | EC875384 | EE163754 |
| N96920 | AV534637 | AW622123 | AI489351 | EC875402 | EE191317 |
| N96920 | BU634949 | AW622155 | BG713789 | EC875583 | EC884966 |
| N96920 | N97116   | AW622163 | AI489351 | EC875587 | EE027006 |
| N96961 | T13880   | AW622182 | AI489351 | EC875742 | EC892321 |
| N96966 | CK119737 | AW622190 | BI925878 | EC875779 | EE182304 |
| N97105 | AA395870 | AW622267 | AI489351 | EC876019 | EC885118 |
| R29901 | R64836   | AW622283 | AW032351 | EC876019 | EE014796 |
| R29927 | BE038167 | AW622290 | BG642582 | EC876345 | DR810218 |
| R29996 | AV555416 | AW622292 | BG713789 | EC876662 | EE180603 |
| R30519 | CK120083 | AW622326 | AI489351 | EC876687 | EE158306 |
| R30519 | H36070   | AW622535 | AI486872 | EC876723 | EE191436 |
| R30519 | T76668   | AW622542 | AW980017 | EC876748 | EE016335 |
| R64757 | CK120349 | AW622544 | AW932562 | EC877010 | EC884121 |
| R64827 | T76668   | AW622546 | BF050270 | EC877150 | EE033926 |
| R64850 | AV534403 | AW622578 | AW929704 | EC877151 | DN229012 |
| R64934 | CK121367 | AW622578 | BE459078 | EC877182 | EE042653 |
| R65194 | T21661   | AW622600 | AI489351 | EC877182 | EE177925 |
| R65268 | CK120349 | AW622604 | BG713789 | EC877328 | EE187980 |

|        |          |          |          |          |          |
|--------|----------|----------|----------|----------|----------|
| R65268 | CK120521 | AW622685 | BE451587 | EC877430 | EE026388 |
| R65537 | AV525662 | AW622722 | AW218355 | EC877751 | EE152748 |
| R90022 | AV534370 | AW622722 | BG128449 | EC877784 | EE290088 |
| R90163 | AA713025 | AW622783 | AW220112 | EC877873 | EC874222 |
| R90173 | R30225   | AW622783 | AW621268 | EC877873 | EE165681 |
| R90200 | N65013   | AW622783 | AW738078 | EC877882 | EE046393 |
| R90247 | BE038890 | AW622783 | BE354613 | EC877882 | EE160524 |
| R90329 | AV524659 | AW622783 | BE458968 | EC877921 | EE169829 |
| R90329 | CK120078 | AW622783 | BE459970 | EC877921 | EE179003 |
| R90595 | T41587   | AW622783 | BG642764 | EC878010 | EE024954 |
| R90710 | N37229   | AW622783 | BI422779 | EC878107 | EC896457 |
| T04054 | AV564797 | AW622815 | AW647917 | EC878128 | EC893076 |
| T04075 | AV439581 | AW622839 | AW737599 | EC878185 | EC902418 |
| T04075 | BE038046 | AW622859 | BE344479 | EC878291 | EE029557 |
| T04075 | T13740   | AW622885 | AW624779 | EC878350 | EE048262 |
| T04381 | BE524799 | AW622915 | BI921785 | EC878458 | EE047481 |
| T04571 | AV525662 | AW622925 | BI935586 | EC878469 | EC882020 |
| T04713 | BE038167 | AW623032 | BG129184 | EC878563 | EC902359 |
| T04820 | T13880   | AW623050 | AI485051 | EC878890 | EE170828 |
| T13647 | N37229   | AW623050 | AI489351 | EC878900 | EE044677 |
| T13680 | BE038890 | AW623093 | AW649925 | EC879007 | EE181800 |
| T14004 | AV536742 | AW623113 | AI486854 | EC879190 | EE152557 |
| T14004 | BE038931 | AW623113 | AI771695 | EC879417 | EE295563 |
| T14004 | CA782052 | AW623113 | AI897184 | EC879644 | EC892448 |
| T14004 | N37195   | AW623113 | AI897379 | EC879759 | BM33364  |
| T20752 | AV536742 | AW623113 | AI899310 | EC879769 | EE158306 |
| T21179 | CK119737 | AW623171 | AW649628 | EC879869 | EC891654 |
| T21444 | CK120349 | AW623171 | BG642848 | EC879884 | EC878234 |
| T21460 | BE038890 | AW623171 | BI927295 | EC879898 | EE017856 |
| T21597 | H36081   | AW623252 | AW623043 | EC879898 | EE042525 |
| T21761 | AV536742 | AW623261 | BG135213 | EC879898 | EE186985 |
| T21804 | CK121974 | AW623263 | BI930805 | EC880084 | EE160052 |
| T21841 | N65013   | AW623272 | AW735906 | EC880316 | EC903850 |
| T21928 | AV552502 | AW623292 | AI486854 | EC880360 | EE046132 |
| T21986 | CK121974 | AW623292 | AI771695 | EC880799 | EE295351 |
| T22069 | CK119737 | AW623292 | AI897184 | EC880981 | EE032266 |
| T22069 | CK121367 | AW623317 | AW219717 | EC881142 | DV503810 |
| T22179 | T13880   | AW623354 | AW219683 | EC881170 | EE047333 |
| T22268 | CK120349 | AW623354 | AW622003 | EC881252 | EC894149 |
| T22268 | CK120521 | AW623354 | AW625036 | EC881513 | EE028323 |
| T22350 | T76282   | AW623354 | BG131185 | EC881517 | EE044223 |
| T22350 | W43148   | AW623471 | BI423371 | EC881546 | DR822024 |
| T22497 | AV536396 | AW623485 | AI489351 | EC881710 | EE294696 |
| T22688 | AA712447 | AW623538 | AI485051 | EC882000 | EE176020 |
| T22688 | BU635787 | AW623538 | AI489351 | EC882376 | CO51954  |
| T22688 | N65061   | AW623561 | BG126438 | EC882410 | EE172609 |
| T22688 | R30165   | AW623572 | AW622742 | EC882533 | EC886445 |
| T22706 | CK120521 | AW623572 | AW648800 | EC882560 | BM26794  |
| T22712 | BE039250 | AW623724 | AW621406 | EC882636 | DN210134 |
| T22850 | CK121974 | AW623797 | AI482849 | EC882636 | DN227218 |
| T22895 | BE039250 | AW623797 | AW032223 | EC882984 | EE183126 |
| T41521 | AA042255 | AW623797 | AW216549 | EC883002 | DR820682 |

|        |          |          |          |          |          |
|--------|----------|----------|----------|----------|----------|
| T41623 | N65111   | AW623797 | AW217592 | EC883183 | EC881905 |
| T41637 | T13880   | AW623797 | AW218828 | EC883183 | EE013812 |
| T41796 | N38690   | AW623797 | AW622763 | EC883333 | EE182135 |
| T42000 | CK118024 | AW623797 | AW624545 | EC883736 | EE187216 |
| T42077 | BE520350 | AW623797 | AW624882 | EC883870 | EC898614 |
| T42083 | BE520350 | AW623797 | AW647708 | EC883878 | EE153919 |
| T42365 | T13712   | AW623797 | AW648598 | EC884242 | EE179343 |
| T42441 | CK120349 | AW623797 | AW650705 | EC884531 | DY540336 |
| T42441 | CK120521 | AW623797 | AW650714 | EC884908 | EC888710 |
| T43156 | AV538695 | AW623797 | AW651508 | EC884936 | EC903850 |
| T43156 | AV550954 | AW623797 | AW738055 | EC884936 | EE040112 |
| T43156 | AV552943 | AW623797 | AW979364 | EC885242 | EE153545 |
| T43343 | BE039250 | AW623797 | AW979810 | EC885427 | EC889900 |
| T43435 | AV519058 | AW623797 | BE353583 | EC885560 | EE028305 |
| T43457 | BE524932 | AW623797 | BE354049 | EC885580 | EE020466 |
| T43617 | AV524819 | AW623797 | BE354193 | EC885649 | EE289267 |
| T43617 | BE038675 | AW623797 | BE459400 | EC885767 | EE165121 |
| T43915 | AA395185 | AW623797 | BE459961 | EC885876 | EE287211 |
| T44018 | H37467   | AW623797 | BG124504 | EC886009 | BM26748  |
| T44018 | T41587   | AW623797 | BG124914 | EC886009 | DR792891 |
| T44018 | T41828   | AW623797 | BG124974 | EC886079 | DR829631 |
| T44018 | W43148   | AW623797 | BG125149 | EC886079 | DV167263 |
| T44139 | BE038167 | AW623797 | BG126534 | EC886079 | DV529739 |
| T44234 | AV537202 | AW623797 | BG129496 | EC886098 | EC879930 |
| T44234 | BE038167 | AW623797 | BG642973 | EC886198 | EE028305 |
| T44738 | T13880   | AW623797 | BI926746 | EC886237 | EE039163 |
| T44785 | H37467   | AW623797 | BI930590 | EC886248 | EC885964 |
| T44785 | T41587   | AW623797 | BI931992 | EC886255 | EE179321 |
| T44785 | T44561   | AW623823 | BI932634 | EC886451 | EE037013 |
| T44785 | T76282   | AW623880 | AI486854 | EC886523 | EE189680 |
| T44785 | W43148   | AW623880 | AI487123 | EC886525 | EE022342 |
| T44872 | T21592   | AW623880 | AI897379 | EC886525 | EE181638 |
| T45806 | T13880   | AW623880 | AI897932 | EC886569 | EC872427 |
| T46065 | T76776   | AW623880 | AI899310 | EC886609 | EE021377 |
| T46442 | N97259   | AW623899 | BI932764 | EC886941 | EC897159 |
| T46442 | T46826   | AW623909 | AW979513 | EC886988 | DR812828 |
| T46495 | CK121367 | AW623914 | AW622742 | EC887078 | EC886491 |
| T46497 | BE520910 | AW623987 | AW623369 | EC887327 | EE189614 |
| T46564 | T44280   | AW623987 | BG127698 | EC887341 | EE172549 |
| T46648 | AV532917 | AW623987 | BI925585 | EC887407 | EE180392 |
| T46772 | CK119737 | AW623987 | BI930482 | EC887440 | EE169330 |
| T75724 | CK120349 | AW624008 | AW735906 | EC887719 | EE044195 |
| T75811 | CK120349 | AW624068 | BI423355 | EC887782 | EE294210 |
| T75884 | Z37679   | AW624105 | AI485051 | EC887787 | EE037861 |
| T76208 | CB074271 | AW624105 | AI489351 | EC887976 | EC883283 |
| T76381 | N37229   | AW624153 | BE458997 | EC888060 | EE019481 |
| T76624 | BE520350 | AW624155 | BE458997 | EC888080 | BM26733  |
| T76808 | AV525662 | AW624157 | AI485051 | EC888210 | EE176454 |
| T88008 | CK121974 | AW624157 | AI489351 | EC888332 | DR958122 |
| T88038 | CK120349 | AW624214 | BG129317 | EC888363 | EC879934 |
| T88103 | T13880   | AW624242 | BE459185 | EC888403 | DV024870 |
| T88223 | CK120349 | AW624262 | BI924592 | EC888527 | EE046062 |

|                        |             |          |          |          |          |
|------------------------|-------------|----------|----------|----------|----------|
| T88223                 | CK120521    | AW624272 | AW738668 | EC888684 | EE031075 |
| T88461                 | CK120349    | AW624299 | BE459565 | EC888684 | EE182594 |
| T88611                 | N37748      | AW624316 | BG643941 | EC888727 | DT946570 |
| T88628                 | AV537202    | AW624482 | AI483439 | EC888733 | EE166126 |
| T88628                 | BE038167    | AW624521 | BG643941 | EC888808 | EC889867 |
| U74122                 | CK119120    | AW624547 | BE459185 | EC889090 | EE037452 |
| W43883                 | AV528265    | AW624602 | AW933726 | EC889092 | DV162942 |
| Z17604                 | AV555477    | AW624703 | AW621917 | EC889140 | EE162077 |
| Z17604                 | AV559085    | AW624722 | AW624674 | EC889140 | EE169614 |
| Z17604                 | AV561360    | AW624722 | BG131623 | EC889325 | EE190513 |
| Z17604                 | AV562596    | AW624920 | AW220276 | EC889335 | EE016292 |
| Z17604                 | AV563688    | AW624931 | AI483829 | EC889363 | DN222023 |
| Z17604                 | AV565668    | AW624956 | AW034545 | EC889464 | EE165478 |
| Z17604                 | Z17633      | AW624984 | AI489351 | EC889562 | EE289450 |
| Z18023                 | AV533400    | AW625030 | AI485051 | EC890019 | EE030649 |
| Z18023                 | Z17626      | AW625030 | AI489351 | EC890024 | EC895618 |
| Z18157                 | BE524083    | AW625081 | AW034545 | EC890147 | EE154968 |
| Z29023                 | AV540479    | AW625108 | AW929896 | EC890179 | DV515249 |
| Z29023                 | AV543495    | AW625175 | AW621710 | EC890179 | DY686092 |
| Z29023                 | AV556562    | AW625175 | BF113760 | EC890209 | DY623754 |
| Z29023                 | AV560444    | AW625201 | AW928657 | EC890327 | EE046140 |
| Z29023                 | AV561319    | AW625246 | AW220276 | EC890354 | EC905751 |
| Z29023                 | AV563358    | AW625253 | AW932475 | EC890415 | EE187506 |
| Z29023                 | AV566265    | AW625287 | BI924623 | EC890625 | EE023251 |
| Z30897                 | T44766      | AW625306 | AI895098 | EC890882 | EE154620 |
| Z35178                 | AV554627    | AW625306 | AW626302 | EC891423 | EC886956 |
| Z37178                 | AV529444    | AW625306 | AW649624 | EC891681 | EC894312 |
| Z37199                 | AV537773    | AW625306 | BE451558 | EC891784 | EC891818 |
| Z38041                 | AV527110    | AW625352 | AI777070 | EC891912 | EE189111 |
| Z47700                 | CK120349    | AW625352 | AW035609 | EC891968 | EE013649 |
| Z47700                 | CK120521    | AW625352 | AW622332 | EC892160 | EE189775 |
| Arabidopsis wassilewsk |             | AW625397 | AI771866 | EC892265 | EC903152 |
| <b>EST1</b>            | <b>EST2</b> | AW625557 | AI489351 | EC892449 | EE191318 |
| DR185371               | DR354491    | AW625587 | BI924623 | EC892659 | EE187430 |
| DR186345               | DR362655    | AW625683 | AW035240 | EC892845 | EE295730 |
| DR186345               | DR362656    | AW625683 | AW928568 | EC893046 | DY534353 |
| DR186357               | DR362655    | AW625683 | AW944720 | EC893053 | EE012991 |
| DR186357               | DR362656    | AW625683 | BG713805 | EC893146 | EE038854 |
| DR186822               | DR368597    | AW625683 | BI421280 | EC893181 | DV540812 |
| DR186823               | DR368597    | AW625683 | BI931157 | EC893370 | EC898335 |
| DR186826               | DR368597    | AW625697 | AI486978 | EC893370 | EE180015 |
| DR193490               | DR229626    | AW625697 | AW622246 | EC893576 | EC873303 |
| DR193585               | DR229626    | AW625700 | AW737933 | EC893624 | EE012242 |
| DR195008               | DR226152    | AW625709 | AW737933 | EC893624 | EE027108 |
| DR195008               | DR226154    | AW625743 | AW035240 | EC893624 | EE031995 |
| DR195008               | DR226156    | AW625743 | AW738738 | EC893645 | EE175824 |
| DR195013               | DR226154    | AW625743 | AW928568 | EC893716 | DV175023 |
| DR196442               | DR314615    | AW625743 | AW944720 | EC893716 | DV513336 |
| DR196587               | DR342095    | AW625743 | BG713805 | EC893731 | EE019869 |
| DR196628               | DR342095    | AW625743 | BI421280 | EC893731 | EE170972 |
| DR196629               | DR342095    | AW625743 | BI931157 | EC893786 | AI491586 |
| DR196634               | DR342095    | AW625807 | BI932634 | EC893786 | DT652048 |

|          |          |          |          |          |          |
|----------|----------|----------|----------|----------|----------|
| DR196637 | DR342095 | AW625837 | AW218629 | EC893821 | EE183747 |
| DR196652 | DR342095 | AW625967 | AI489351 | EC893831 | EE181238 |
| DR196688 | DR342095 | AW625968 | AW030261 | EC893918 | EE043833 |
| DR196712 | DR342095 | AW626020 | BG134587 | EC894151 | EE168520 |
| DR196803 | DR342095 | AW626061 | AW625367 | EC894592 | EE153673 |
| DR196844 | DR342095 | AW626063 | BG135524 | EC894592 | EE160409 |
| DR196918 | DR342095 | AW626068 | AW622988 | EC894592 | EE170862 |
| DR196921 | DR342095 | AW626175 | AW934021 | EC894673 | EE171281 |
| DR196923 | DR342095 | AW626175 | BI929777 | EC894750 | EE034008 |
| DR196926 | DR342095 | AW626261 | AW931832 | EC895318 | EE158306 |
| DR196933 | DR342095 | AW626261 | BI923935 | EC895336 | EC902853 |
| DR196938 | DR342095 | AW647874 | BI923552 | EC895377 | EC889784 |
| DR197019 | DR342095 | AW647896 | AI486469 | EC895377 | EC896644 |
| DR197020 | DR342095 | AW647906 | AW934354 | EC895556 | EC904112 |
| DR197335 | DR231057 | AW647945 | AI485634 | EC895745 | EE018497 |
| DR201770 | DR358281 | AW647962 | BI921785 | EC895745 | EE020225 |
| DR202609 | DR306424 | AW647963 | AW219693 | EC895888 | EC889383 |
| DR208808 | DR259551 | AW647963 | AW930274 | EC896421 | EE019391 |
| DR208815 | DR259551 | AW647963 | AW934021 | EC896523 | EC875773 |
| DR213723 | DR368701 | AW647963 | AW979594 | EC896531 | EE042144 |
| DR214592 | DR214588 | AW647963 | BE450602 | EC896602 | EC897303 |
| DR216068 | DR263094 | AW647963 | BI421759 | EC896602 | EC899445 |
| DR216070 | DR263094 | AW647963 | BI929777 | EC896602 | EC904608 |
| DR216071 | DR263094 | AW648018 | BI926695 | EC896602 | EE022913 |
| DR216089 | DR263094 | AW648019 | AW737933 | EC896602 | EE190199 |
| DR216114 | DR263094 | AW648045 | AI485051 | EC896674 | EE034304 |
| DR216121 | DR263094 | AW648045 | AI489351 | EC896689 | EE046083 |
| DR216138 | DR263094 | AW648092 | AW030366 | EC896732 | EE170748 |
| DR220781 | DR276394 | AW648101 | AW624697 | EC896757 | EE010427 |
| DR220786 | DR276394 | AW648110 | AW217390 | EC896800 | EC875588 |
| DR220793 | DR276394 | AW648110 | BG125864 | EC896805 | CO52431  |
| DR221579 | DR221641 | AW648136 | AW033678 | EC896829 | CF244156 |
| DR221816 | DR350836 | AW648136 | AW033793 | EC896846 | EE175493 |
| DR221992 | DR363996 | AW648149 | AI490344 | EC897029 | EE021565 |
| DR222103 | DR253635 | AW648274 | AI486978 | EC897029 | EE157028 |
| DR222104 | DR253635 | AW648279 | AI489351 | EC897029 | EE163748 |
| DR222105 | DR253635 | AW648312 | BG129317 | EC897077 | EC874891 |
| DR222108 | DR253635 | AW648319 | BI926695 | EC897081 | EC885356 |
| DR222547 | DR262590 | AW648343 | BG129184 | EC897126 | EE156164 |
| DR223129 | DR368961 | AW648343 | BI932634 | EC897262 | DT946711 |
| DR223130 | DR368961 | AW648374 | BF050216 | EC897305 | CO52818  |
| DR223131 | DR368961 | AW648471 | BG134587 | EC897310 | EE024193 |
| DR223148 | DR368961 | AW648480 | BG643748 | EC897320 | EE162323 |
| DR223201 | DR368961 | AW648536 | AW622023 | EC897363 | EE184455 |
| DR223210 | DR368961 | AW648536 | BG128449 | EC897394 | EE014400 |
| DR223223 | DR368961 | AW648690 | AI489351 | EC897688 | EE168986 |
| DR223322 | DR224631 | AW649047 | BI925878 | EC897778 | EC901992 |
| DR225170 | DR274362 | AW649085 | BE458997 | EC897778 | EE186427 |
| DR225170 | DR274368 | AW649119 | AW929621 | EC897810 | EE157720 |
| DR225170 | DR274420 | AW649133 | AI489351 | EC897863 | EE013960 |
| DR225170 | DR274430 | AW649149 | AW033339 | EC897927 | EE025754 |
| DR225170 | DR274432 | AW649195 | BE451237 | EC897949 | DY534353 |

|          |          |          |          |          |          |
|----------|----------|----------|----------|----------|----------|
| DR225170 | DR274440 | AW649198 | BG128019 | EC898472 | EC901956 |
| DR225170 | DR274476 | AW649258 | AI485051 | EC898472 | EE029410 |
| DR225170 | DR274486 | AW649258 | AI489351 | EC898516 | EE038446 |
| DR225170 | DR274488 | AW649350 | BG129317 | EC898830 | EC877684 |
| DR225170 | DR274504 | AW649364 | AW218355 | EC898830 | EE163771 |
| DR225952 | DR297104 | AW649364 | AW622023 | EC898978 | EE043386 |
| DR225980 | DR368591 | AW649465 | AW030367 | EC899157 | EE024397 |
| DR225981 | DR368591 | AW649465 | AW033678 | EC899157 | EE174000 |
| DR225986 | DR258390 | AW649465 | AW033793 | EC899186 | EE171163 |
| DR225986 | DR258531 | AW649483 | BG643997 | EC899282 | EE046238 |
| DR225986 | DR258971 | AW649523 | AI489351 | EC899532 | DT641836 |
| DR225986 | DR258975 | AW649707 | AI489351 | EC899580 | EE290582 |
| DR226043 | DR328952 | AW649847 | AI489420 | EC899698 | EE024985 |
| DR229157 | DR355539 | AW649863 | AI487809 | EC899800 | EE043314 |
| DR230252 | DR353136 | AW649988 | BE459565 | EC900204 | EC894965 |
| DR230252 | DR353137 | AW650169 | AW429161 | EC900204 | EC897950 |
| DR232150 | DR369768 | AW650268 | AI489351 | EC900204 | EE026576 |
| DR232758 | DR365062 | AW650283 | AW649320 | EC900285 | EE188944 |
| DR232758 | DR365063 | AW650484 | BI926695 | EC900309 | EE158306 |
| DR232758 | DR365065 | AW650556 | AI483681 | EC900350 | EB701687 |
| DR232758 | DR365068 | AW650556 | AI894523 | EC900481 | EE013393 |
| DR232758 | DR365071 | AW650556 | AI896372 | EC900495 | EE173229 |
| DR232758 | DR365073 | AW650556 | AI897280 | EC900631 | EE041790 |
| DR232758 | DR365074 | AW650556 | AI899269 | EC900864 | DR805082 |
| DR232947 | DR232946 | AW650776 | AW623185 | EC900864 | DV530711 |
| DR232947 | DR232949 | AW650829 | AW033678 | EC900932 | EC892644 |
| DR232947 | DR232950 | AW650829 | AW033793 | EC900932 | EC896150 |
| DR232947 | DR232951 | AW650858 | BI932978 | EC901015 | EE036527 |
| DR232947 | DR232954 | AW650915 | BE458784 | EC901205 | EE024874 |
| DR232947 | DR232955 | AW650917 | BE458997 | EC901233 | EC896104 |
| DR232947 | DR232957 | AW650940 | BI929270 | EC901249 | EE183565 |
| DR232947 | DR232958 | AW650949 | AW622742 | EC901266 | EE038130 |
| DR232947 | DR232959 | AW650949 | AW648800 | EC901271 | DV531595 |
| DR232947 | DR232960 | AW651047 | AW030691 | EC901271 | DY233268 |
| DR233823 | DR275701 | AW651074 | AI489351 | EC901628 | EE158306 |
| DR235207 | DR221371 | AW651122 | AI489351 | EC901907 | EE165430 |
| DR235207 | DR221652 | AW651126 | BI932960 | EC902038 | EC889608 |
| DR240216 | DR227179 | AW651174 | BE458997 | EC902119 | DR794441 |
| DR240216 | DR227180 | AW651176 | BE458997 | EC902202 | EC875510 |
| DR241418 | DR233675 | AW651197 | AW934334 | EC902396 | EC891676 |
| DR242232 | DR209580 | AW651273 | AW932475 | EC902435 | EE046562 |
| DR242232 | DR209633 | AW651283 | AW031841 | EC902440 | CO52616  |
| DR242232 | DR230345 | AW651314 | AW621199 | EC902446 | EC898668 |
| DR244778 | DR359100 | AW651330 | BI924732 | EC902499 | EE182727 |
| DR244779 | DR359100 | AW651339 | AW033678 | EC902506 | EE011720 |
| DR244780 | DR359100 | AW651458 | AW735906 | EC902805 | DV512806 |
| DR244890 | DR361073 | AW651490 | AW648125 | EC902954 | EC874494 |
| DR246274 | DR369090 | AW651500 | AW030261 | EC903021 | DR822434 |
| DR246276 | DR369090 | AW651575 | AW934021 | EC903342 | EE291995 |
| DR246278 | DR369090 | AW651575 | BI929777 | EC903445 | EE023594 |
| DR246279 | DR369090 | AW735759 | AI486415 | EC903445 | EE032868 |
| DR246286 | DR369090 | AW735759 | AI486729 | EC903479 | EE286459 |

|          |          |          |          |          |          |
|----------|----------|----------|----------|----------|----------|
| DR246291 | DR369090 | AW735759 | AI487087 | EC903681 | EE158729 |
| DR246295 | DR369090 | AW735759 | AW035892 | EC904058 | EE295377 |
| DR246296 | DR369090 | AW735759 | AW036659 | EC904314 | EE025539 |
| DR246297 | DR369090 | AW735759 | AW934414 | EC904727 | AI649553 |
| DR246298 | DR369090 | AW735759 | BE353726 | EC904765 | EE152664 |
| DR246305 | DR369090 | AW735759 | BE462171 | EC904979 | EE014745 |
| DR246312 | DR369090 | AW735759 | BI923765 | EC905312 | EE157019 |
| DR246319 | DR369090 | AW735759 | BI923771 | EC905401 | DR805113 |
| DR246357 | DR369090 | AW735759 | BI928769 | EC905421 | DV163393 |
| DR246359 | DR369090 | AW735869 | AI489351 | EC905431 | EE013229 |
| DR246360 | DR369090 | AW735876 | BI932764 | EC905467 | DN230845 |
| DR246363 | DR369090 | AW735910 | BI929270 | EC905467 | DR824178 |
| DR246364 | DR369090 | AW735934 | AW648087 | EC905467 | DR826227 |
| DR246376 | DR369090 | AW735934 | AW944911 | EC905467 | EB638119 |
| DR246384 | DR369090 | AW735934 | BG134418 | EC905582 | DR787001 |
| DR246393 | DR369090 | AW735958 | AW218920 | EC905582 | DR823953 |
| DR246394 | DR369090 | AW735959 | AI895612 | EC905582 | DR826480 |
| DR246395 | DR369090 | AW737104 | BI933089 | EC905582 | DT648623 |
| DR246401 | DR369090 | AW737127 | AW033596 | EC905582 | EB408426 |
| DR246455 | DR369090 | AW737300 | AW737737 | EC905582 | EB822356 |
| DR247803 | DR260533 | AW737321 | AW030366 | EC905626 | EC881610 |
| DR247803 | DR260535 | AW737350 | BE462267 | EC905661 | EE182671 |
| DR247804 | DR260535 | AW737352 | AW735906 | EC905752 | EC896842 |
| DR247805 | DR260535 | AW737465 | AW624400 | EC905772 | EC880684 |
| DR247807 | DR260535 | AW737635 | BI923946 | EC905818 | EE013812 |
| DR247808 | DR260533 | AW737686 | AW738405 | EC905874 | EE286137 |
| DR247808 | DR260535 | AW737740 | BI932248 | EC905930 | EB818702 |
| DR247809 | DR260533 | AW737761 | AI489351 | EC905940 | EC896932 |
| DR247809 | DR260535 | AW737775 | BG643206 | EC906044 | EC905714 |
| DR247810 | DR260533 | AW737820 | BI930850 | EC906044 | EE045445 |
| DR247810 | DR260535 | AW737820 | BI930917 | EE010402 | DR819248 |
| DR247811 | DR260533 | AW737820 | BI931505 | EE010402 | DV510110 |
| DR247811 | DR260535 | AW737850 | AI489351 | EE010459 | EE028872 |
| DR247813 | DR260535 | AW737877 | BI422656 | EE010459 | EE036028 |
| DR247814 | DR260533 | AW737907 | AW737599 | EE010461 | EE176378 |
| DR247814 | DR260535 | AW737907 | BI932248 | EE010517 | EE289638 |
| DR247815 | DR260533 | AW737990 | AW737713 | EE010573 | EC880372 |
| DR247815 | DR260535 | AW738035 | BI930850 | EE010716 | EB408986 |
| DR247829 | DR260533 | AW738045 | AI771528 | EE010866 | EC877685 |
| DR247829 | DR260535 | AW738077 | BE353467 | EE010930 | DR808069 |
| DR247830 | DR260533 | AW738077 | BE462144 | EE011075 | EE165301 |
| DR247840 | DR260533 | AW738303 | BE462157 | EE011156 | EE159147 |
| DR247840 | DR260535 | AW738378 | AW035342 | EE011203 | EE182412 |
| DR247869 | DR260533 | AW738502 | AW033924 | EE011531 | EE036814 |
| DR247869 | DR260535 | AW738742 | BF051097 | EE011535 | EC888322 |
| DR247871 | DR260533 | AW928322 | BI930850 | EE011543 | EE035111 |
| DR247871 | DR260535 | AW928322 | BI931505 | EE011582 | EE285326 |
| DR247874 | DR260533 | AW928339 | AI899010 | EE011583 | EE175088 |
| DR247876 | DR260533 | AW928348 | AI485051 | EE011863 | EE046626 |
| DR247876 | DR260535 | AW928348 | AI489351 | EE012140 | EE028362 |
| DR247877 | DR260533 | AW928350 | AI487739 | EE012177 | EC901957 |
| DR247877 | DR260535 | AW928377 | AW930070 | EE012194 | EB673160 |

|          |          |          |          |          |          |
|----------|----------|----------|----------|----------|----------|
| DR247879 | DR260533 | AW928416 | AI485051 | EE012194 | EC883857 |
| DR247879 | DR260535 | AW928416 | AI489351 | EE012224 | EC881591 |
| DR247880 | DR260533 | AW928449 | AW034986 | EE012225 | EE284751 |
| DR247880 | DR260535 | AW928483 | AI482715 | EE012323 | EC905769 |
| DR247895 | DR260533 | AW928529 | BG123226 | EE012323 | EE157482 |
| DR247896 | DR260533 | AW928550 | AI489351 | EE012334 | EE034215 |
| DR247897 | DR260535 | AW928560 | AW623874 | EE012366 | EC879722 |
| DR247898 | DR260535 | AW928746 | BI929329 | EE012366 | EE190475 |
| DR247899 | DR260533 | AW928751 | BI924076 | EE012551 | EE043995 |
| DR247900 | DR260535 | AW928783 | AW622742 | EE012874 | DY540580 |
| DR247901 | DR260535 | AW928783 | AW648800 | EE013230 | EC879930 |
| DR247904 | DR260533 | AW928789 | BI421759 | EE013232 | EE284997 |
| DR247905 | DR260533 | AW928789 | BI929777 | EE013316 | EE188302 |
| DR247909 | DR260533 | AW928811 | BI922874 | EE013346 | EC902965 |
| DR247909 | DR260535 | AW928813 | AI490899 | EE013437 | DV530585 |
| DR247911 | DR260533 | AW928819 | BI935525 | EE013513 | EE158356 |
| DR247914 | DR260533 | AW928835 | BI924076 | EE013519 | CO52318  |
| DR247914 | DR260535 | AW928876 | AW219305 | EE013701 | DY530429 |
| DR247915 | DR260535 | AW928879 | BI924623 | EE013736 | EE030766 |
| DR247923 | DR260533 | AW928885 | BI924623 | EE013895 | AI649795 |
| DR247923 | DR260535 | AW929156 | BI924612 | EE014035 | EC894349 |
| DR247994 | DR260533 | AW929188 | AW623787 | EE014134 | EE160299 |
| DR248999 | DR349297 | AW929380 | AW930070 | EE014251 | EE038697 |
| DR249113 | DR245012 | AW929410 | AW622742 | EE014251 | EE292767 |
| DR249117 | DR245012 | AW929429 | BE451023 | EE014650 | EC895771 |
| DR249119 | DR245011 | AW929447 | BI934148 | EE014733 | EC877254 |
| DR249119 | DR245012 | AW929455 | AW648644 | EE014877 | DV167686 |
| DR249127 | DR245011 | AW929455 | BG127968 | EE014890 | DY236311 |
| DR249127 | DR245012 | AW929455 | BI930822 | EE014983 | EE039906 |
| DR249128 | DR245011 | AW929460 | BG129317 | EE015048 | EE177349 |
| DR249128 | DR245012 | AW929476 | AW218667 | EE015161 | EE181330 |
| DR249129 | DR245011 | AW929476 | AW623856 | EE015168 | EE015449 |
| DR249129 | DR245012 | AW929476 | AW624161 | EE015194 | EE011104 |
| DR249134 | DR245011 | AW929476 | AW648343 | EE015211 | EE017590 |
| DR249134 | DR245012 | AW929476 | BG130691 | EE015235 | EC886014 |
| DR249141 | DR245011 | AW929476 | BI924350 | EE015274 | EC879050 |
| DR249141 | DR245012 | AW929476 | BI924489 | EE015284 | EC904057 |
| DR249143 | DR245012 | AW929476 | BI927123 | EE015292 | EE180362 |
| DR249144 | DR245012 | AW929476 | BI932345 | EE015313 | EE010728 |
| DR249145 | DR245012 | AW929476 | BI932550 | EE015319 | EE018710 |
| DR250284 | DR383142 | AW929476 | BI933173 | EE015891 | EE038932 |
| DR250489 | DR383142 | AW929476 | BI934155 | EE015928 | EC895046 |
| DR250493 | DR383142 | AW929515 | AI771690 | EE016073 | EE157522 |
| DR252609 | DR231407 | AW929590 | BI924344 | EE016226 | EE158306 |
| DR252609 | DR231408 | AW929592 | AW615980 | EE016432 | EE171331 |
| DR252610 | DR231407 | AW929592 | AW623823 | EE016447 | EE190068 |
| DR252616 | DR231407 | AW929592 | AW624161 | EE016565 | EE290601 |
| DR252616 | DR231408 | AW929592 | AW929879 | EE016600 | EE165393 |
| DR253648 | DR338694 | AW929592 | BE354888 | EE016663 | EE025872 |
| DR254835 | DR184529 | AW929592 | BG127219 | EE016790 | EE157864 |
| DR254835 | DR184531 | AW929592 | BI924489 | EE016831 | EE170452 |
| DR254835 | DR184532 | AW929592 | BI931684 | EE016939 | DR796101 |



|          |          |          |          |          |          |
|----------|----------|----------|----------|----------|----------|
| DR254835 | DR184533 | AW929592 | BI931995 | EE017046 | EE045161 |
| DR254835 | DR184534 | AW929592 | BI932015 | EE017180 | DR798503 |
| DR254835 | DR184560 | AW929592 | BI932391 | EE017194 | EC876371 |
| DR254835 | DR184636 | AW929674 | BI423355 | EE017444 | EE158306 |
| DR254835 | DR184643 | AW929702 | BI933855 | EE017475 | EE165910 |
| DR254835 | DR184645 | AW929703 | AI489351 | EE017849 | EC873088 |
| DR254835 | DR184649 | AW929777 | AI489351 | EE018086 | DY621085 |
| DR254835 | DR184682 | AW929869 | AI485051 | EE018123 | EE041409 |
| DR254835 | DR184684 | AW929869 | AI489351 | EE018239 | EE166126 |
| DR254835 | DR184689 | AW929879 | BI423355 | EE018249 | EC888594 |
| DR254835 | DR184712 | AW929879 | BI932634 | EE018306 | EE026272 |
| DR254835 | DR184721 | AW929894 | AW738668 | EE018313 | EC894993 |
| DR254835 | DR184726 | AW929921 | BE451587 | EE018399 | EE019100 |
| DR254835 | DR184727 | AW929939 | AW217552 | EE018409 | EE044607 |
| DR254835 | DR184737 | AW929939 | BG128007 | EE018704 | EE031080 |
| DR254835 | DR362457 | AW929950 | BI932127 | EE018707 | EE162778 |
| DR254835 | DR362458 | AW930067 | AI894582 | EE018711 | EC879930 |
| DR254835 | DR362459 | AW930067 | AW032867 | EE019066 | EE180392 |
| DR255431 | DR259658 | AW930067 | AW220627 | EE019201 | EC903231 |
| DR255442 | DR226068 | AW930067 | AW931371 | EE019201 | EE027313 |
| DR255442 | DR226069 | AW930067 | AW932928 | EE019469 | EE027130 |
| DR257418 | DR272342 | AW930067 | BE459095 | EE019584 | EE178627 |
| DR257418 | DR272364 | AW930067 | BE459116 | EE019601 | EE024825 |
| DR257418 | DR272382 | AW930067 | BE459765 | EE019651 | EC894876 |
| DR257419 | DR272342 | AW930067 | BE459948 | EE019651 | EC898713 |
| DR257419 | DR272364 | AW930067 | BE459962 | EE019651 | EE168891 |
| DR257419 | DR272382 | AW930067 | BE460004 | EE019651 | EE170415 |
| DR257420 | DR272342 | AW930067 | BF050757 | EE019651 | EE184488 |
| DR257420 | DR272364 | AW930067 | BF051121 | EE019651 | EE187744 |
| DR257421 | DR272342 | AW930067 | BF051996 | EE019653 | EE178138 |
| DR257421 | DR272364 | AW930067 | BG135287 | EE019653 | EE295012 |
| DR257421 | DR272382 | AW930110 | AI485051 | EE019693 | EE153376 |
| DR257423 | DR272342 | AW930110 | AI489351 | EE019900 | EE034932 |
| DR257423 | DR272364 | AW930177 | BG713789 | EE019902 | EE169176 |
| DR257423 | DR272382 | AW930186 | BI932593 | EE019936 | EE029412 |
| DR257424 | DR272342 | AW930207 | BG128211 | EE019990 | EE156079 |
| DR257424 | DR272364 | AW930250 | AW220484 | EE019994 | EC900286 |
| DR257424 | DR272382 | AW930250 | AW221216 | EE020031 | EE018918 |
| DR257425 | DR272342 | AW930250 | BE462085 | EE020051 | EC886945 |
| DR257425 | DR272364 | AW930250 | BI421606 | EE020058 | EE170953 |
| DR257427 | DR272342 | AW930250 | BI927060 | EE020145 | EE171782 |
| DR257427 | DR272364 | AW930257 | BI932475 | EE020238 | EC884466 |
| DR257427 | DR272382 | AW930258 | BG713789 | EE020282 | EE287748 |
| DR257429 | DR272342 | AW930259 | BG713789 | EE020318 | EE047783 |
| DR257429 | DR272364 | AW930313 | AW035945 | EE020474 | EE039457 |
| DR257429 | DR272382 | AW930313 | BG135093 | EE020620 | EE158172 |
| DR257448 | DR260535 | AW930316 | AW030121 | EE020684 | EC895771 |
| DR257870 | DR364185 | AW930434 | BG713789 | EE020698 | EE161069 |
| DR258103 | DR364633 | AW930603 | AW035891 | EE020869 | EC880314 |
| DR258103 | DR364634 | AW930603 | BF050342 | EE021071 | EE184696 |
| DR258103 | DR364636 | AW930664 | BI421964 | EE021205 | EE292710 |
| DR258103 | DR364637 | AW930687 | AW932475 | EE021205 | EE295356 |

|          |          |          |          |          |          |
|----------|----------|----------|----------|----------|----------|
| DR258104 | DR364633 | AW930742 | AW033339 | EE021237 | DR802535 |
| DR258104 | DR364634 | AW930752 | AI489351 | EE021395 | EC895230 |
| DR258104 | DR364636 | AW930756 | AI489351 | EE021395 | EE289133 |
| DR258104 | DR364637 | AW930797 | AI489351 | EE021547 | EC906071 |
| DR258106 | DR364634 | AW930829 | BG713789 | EE021583 | EC879930 |
| DR258106 | DR364636 | AW930849 | AW221047 | EE021620 | EE191460 |
| DR258106 | DR364637 | AW930872 | AI489351 | EE021672 | EC889718 |
| DR258357 | DR240126 | AW930908 | AW944911 | EE021672 | EE176866 |
| DR258357 | DR349200 | AW930912 | AI489782 | EE021704 | EC879930 |
| DR258358 | DR240126 | AW930924 | AW737933 | EE021806 | EE286648 |
| DR258358 | DR349200 | AW930977 | AI489351 | EE021844 | EE023478 |
| DR258432 | DR258513 | AW931008 | AW932660 | EE021903 | EE189123 |
| DR258976 | DR258554 | AW931046 | BG128804 | EE021917 | EE044191 |
| DR259019 | DR267605 | AW931061 | AI489351 | EE021966 | EE181276 |
| DR259019 | DR267635 | AW931066 | BI921773 | EE022054 | EE167684 |
| DR259019 | DR267636 | AW931217 | AI489351 | EE022064 | EE285728 |
| DR259019 | DR267639 | AW931239 | AW932475 | EE022092 | EC897627 |
| DR259806 | DR286124 | AW931248 | BG713789 | EE022142 | CF648629 |
| DR259808 | DR286124 | AW931250 | BG713789 | EE022142 | EB163829 |
| DR259809 | DR286124 | AW931255 | AW624697 | EE022345 | EE172302 |
| DR260396 | DR242253 | AW931320 | BG713789 | EE022493 | EC900286 |
| DR260396 | DR242262 | AW931324 | BG713789 | EE022549 | EE293646 |
| DR260396 | DR242265 | AW931332 | AW929564 | EE022594 | DR795249 |
| DR260396 | DR242266 | AW931362 | AI485861 | EE022609 | DN215588 |
| DR260396 | DR242269 | AW931362 | AW035604 | EE022631 | EE038101 |
| DR260397 | DR242252 | AW931362 | AW737895 | EE022669 | EE171782 |
| DR260397 | DR242253 | AW931362 | AW930438 | EE023047 | EE020833 |
| DR260397 | DR242259 | AW931362 | AW931510 | EE023049 | EE292470 |
| DR260397 | DR242260 | AW931362 | AW933100 | EE023171 | EE184767 |
| DR260397 | DR242261 | AW931362 | BI421366 | EE023407 | EE040112 |
| DR260397 | DR242262 | AW931389 | AW930987 | EE023592 | EE183323 |
| DR260397 | DR242263 | AW931396 | BG713789 | EE024043 | EE025482 |
| DR260397 | DR242264 | AW931410 | AW932475 | EE024180 | EC898273 |
| DR260397 | DR242269 | AW931439 | AI483829 | EE024252 | EE022466 |
| DR260448 | DR342095 | AW931443 | AI489351 | EE024285 | EE173127 |
| DR260449 | DR342095 | AW931449 | AI489351 | EE024332 | EC881830 |
| DR260598 | DR248515 | AW931512 | AI489351 | EE024332 | EC887367 |
| DR260598 | DR248516 | AW931558 | BF051641 | EE024332 | EC897962 |
| DR260598 | DR248517 | AW931685 | AI895515 | EE024332 | EE043404 |
| DR260598 | DR248530 | AW931738 | AW932475 | EE024332 | EE159153 |
| DR260598 | DR248538 | AW931835 | BI933820 | EE024513 | EE294562 |
| DR260598 | DR248541 | AW931883 | BG713789 | EE024674 | EE155692 |
| DR260598 | DR248543 | AW931887 | AW932475 | EE025131 | EE163786 |
| DR260598 | DR248544 | AW931918 | AW932475 | EE025295 | EC872335 |
| DR260598 | DR248545 | AW931940 | BG713789 | EE025449 | EE185542 |
| DR260598 | DR248546 | AW931961 | AI489351 | EE025540 | EE188302 |
| DR260598 | DR248547 | AW932018 | BG713789 | EE025603 | EC874364 |
| DR260598 | DR248548 | AW932031 | BI924130 | EE025634 | EE028563 |
| DR260598 | DR248549 | AW932058 | BE450692 | EE025689 | EC906024 |
| DR260598 | DR248550 | AW932087 | AW030102 | EE025689 | EE034921 |
| DR260598 | DR248551 | AW932124 | AI485051 | EE025726 | EE294963 |
| DR260598 | DR248552 | AW932124 | AI489351 | EE025902 | CO52116  |

|          |          |          |          |          |          |
|----------|----------|----------|----------|----------|----------|
| DR260598 | DR248553 | AW932156 | AW934354 | EE026049 | EE044627 |
| DR260598 | DR248554 | AW932168 | BG713789 | EE026049 | EE190458 |
| DR260598 | DR248555 | AW932194 | AI489153 | EE026648 | EC890221 |
| DR260598 | DR248556 | AW932196 | AW737933 | EE027048 | EE012461 |
| DR260598 | DR248560 | AW932215 | AW219305 | EE027151 | EE171288 |
| DR260598 | DR248561 | AW932223 | AW932475 | EE027178 | EE181683 |
| DR260598 | DR248562 | AW932246 | BG713789 | EE027635 | EE295253 |
| DR260598 | DR248564 | AW932258 | AW737933 | EE028359 | EE162280 |
| DR260598 | DR248565 | AW932294 | BI927440 | EE028932 | EE162654 |
| DR260598 | DR248566 | AW932306 | BG713789 | EE028984 | EC876947 |
| DR260598 | DR248567 | AW932340 | AI489351 | EE029194 | EE289720 |
| DR260598 | DR248568 | AW932402 | BG713789 | EE029368 | EE033219 |
| DR260598 | DR248569 | AW932412 | AW932475 | EE029480 | EE035398 |
| DR260598 | DR248570 | AW932423 | BG713789 | EE029619 | CB886254 |
| DR260598 | DR248571 | AW932441 | AI489351 | EE029619 | CO51845  |
| DR260598 | DR248572 | AW932455 | BG713789 | EE029619 | DN230307 |
| DR260598 | DR248575 | AW932467 | AI482969 | EE029619 | DN232942 |
| DR260598 | DR248576 | AW932480 | AW031145 | EE029619 | DT644713 |
| DR260598 | DR248577 | AW932592 | AW621540 | EE029619 | DV513620 |
| DR260598 | DR248578 | AW932608 | AI487825 | EE029619 | DV530410 |
| DR260598 | DR248579 | AW932608 | AI491107 | EE029933 | EE172551 |
| DR260598 | DR248581 | AW932608 | AI898256 | EE030000 | EC879930 |
| DR260598 | DR248583 | AW932608 | BE353648 | EE030117 | EC892836 |
| DR260598 | DR248584 | AW932649 | AW622101 | EE030209 | EE188302 |
| DR260598 | DR248585 | AW932650 | AI486469 | EE030348 | EE285634 |
| DR260598 | DR248586 | AW932661 | BG131546 | EE030644 | EC873238 |
| DR260598 | DR248587 | AW932679 | AI489351 | EE030644 | EE025588 |
| DR260598 | DR248588 | AW932697 | AW737933 | EE030650 | EC884350 |
| DR260598 | DR248589 | AW932718 | BG713789 | EE030911 | EC895557 |
| DR260598 | DR248591 | AW932753 | AW932860 | EE031106 | EE157816 |
| DR260598 | DR248606 | AW932848 | AW621199 | EE031141 | EE159518 |
| DR260598 | DR248610 | AW932893 | BG713789 | EE031398 | EE011133 |
| DR260598 | DR248611 | AW932894 | AW032571 | EE031553 | EC878894 |
| DR260598 | DR248613 | AW932894 | AW932881 | EE031649 | EB674153 |
| DR260598 | DR248615 | AW932894 | AW934458 | EE031806 | DN223749 |
| DR260598 | DR248617 | AW932894 | AW934470 | EE031867 | EE011073 |
| DR260598 | DR248623 | AW932899 | BG713789 | EE031914 | EE165103 |
| DR260598 | DR248626 | AW932937 | AW616032 | EE031922 | EE041810 |
| DR260598 | DR248628 | AW933005 | AW219292 | EE032134 | EC883228 |
| DR260598 | DR248651 | AW933058 | AW932475 | EE032368 | EE188988 |
| DR260598 | DR248652 | AW933081 | AW219305 | EE032904 | CD001188 |
| DR260598 | DR248653 | AW933133 | BI933820 | EE032940 | EE180392 |
| DR260598 | DR248655 | AW933142 | BE451214 | EE033521 | DV031131 |
| DR260598 | DR248656 | AW933180 | AW979798 | EE033577 | EC880646 |
| DR260598 | DR248657 | AW933210 | BG713789 | EE033580 | EE177540 |
| DR260598 | DR248659 | AW933233 | BE458997 | EE033580 | EE184039 |
| DR260598 | DR248662 | AW933247 | AW931275 | EE033693 | EE013865 |
| DR260598 | DR248663 | AW933247 | AW933100 | EE033700 | EE285211 |
| DR260598 | DR248664 | AW933247 | AW934110 | EE033912 | EE286523 |
| DR260598 | DR248665 | AW933292 | BI929362 | EE033950 | DR818760 |
| DR260598 | DR248666 | AW933347 | BG713789 | EE034102 | EE176835 |
| DR260598 | DR248667 | AW933366 | AW030199 | EE034148 | EE042475 |

|          |          |          |          |          |          |
|----------|----------|----------|----------|----------|----------|
| DR260598 | DR248669 | AW933417 | AI486415 | EE034194 | EE168325 |
| DR260598 | DR248674 | AW933417 | AI486729 | EE034340 | EE294469 |
| DR260598 | DR248675 | AW933417 | AI487087 | EE034430 | EE013917 |
| DR260598 | DR248676 | AW933417 | AI489490 | EE034454 | EC877030 |
| DR260598 | DR248677 | AW933417 | AI894882 | EE034470 | EC885017 |
| DR260598 | DR248678 | AW933417 | AW035892 | EE034733 | EE048264 |
| DR260598 | DR248680 | AW933417 | AW036659 | EE034861 | EE018363 |
| DR260598 | DR248682 | AW933417 | AW934414 | EE034863 | EC886956 |
| DR260598 | DR248683 | AW933417 | BE353726 | EE034953 | EE186210 |
| DR260598 | DR248684 | AW933417 | BE462171 | EE035035 | EE031063 |
| DR260598 | DR248688 | AW933417 | BG127303 | EE035130 | EC893511 |
| DR260598 | DR248698 | AW933417 | BI923765 | EE035204 | EE293330 |
| DR260598 | DR248707 | AW933417 | BI923771 | EE035406 | EE011849 |
| DR260598 | DR248709 | AW933417 | BI928769 | EE035406 | EE178954 |
| DR260598 | DR248711 | AW933417 | BI930883 | EE035470 | EE014700 |
| DR260598 | DR248716 | AW933517 | AI485634 | EE035601 | EC884188 |
| DR260598 | DR248720 | AW933528 | AW932860 | EE035690 | EE166912 |
| DR260598 | DR248721 | AW933610 | AI485729 | EE035710 | DN218755 |
| DR260598 | DR248722 | AW933621 | BG713789 | EE035799 | EE011315 |
| DR260598 | DR248724 | AW933689 | AW931832 | EE035828 | DR963444 |
| DR260598 | DR248726 | AW933739 | BG713789 | EE035963 | EE156852 |
| DR260598 | DR248727 | AW933744 | AW933116 | EE036123 | EE292459 |
| DR260598 | DR248729 | AW933781 | BG713789 | EE036212 | EE017121 |
| DR260598 | DR248731 | AW933858 | AI489351 | EE036448 | EC900286 |
| DR260598 | DR248732 | AW933883 | BG713789 | EE036494 | EC881112 |
| DR260598 | DR248733 | AW933913 | AI896736 | EE036656 | DR797329 |
| DR260598 | DR248734 | AW934003 | BE451587 | EE036849 | EE186899 |
| DR260598 | DR248735 | AW934008 | AI482941 | EE036854 | EE047929 |
| DR260598 | DR248736 | AW934051 | AI489351 | EE037444 | EE188302 |
| DR260598 | DR248738 | AW934113 | AW033713 | EE037463 | EE043936 |
| DR260598 | DR248739 | AW934125 | AI489351 | EE037635 | DY235213 |
| DR260598 | DR248740 | AW934199 | AW035342 | EE037818 | EE034480 |
| DR260598 | DR248742 | AW934222 | BI933865 | EE037988 | EE162043 |
| DR260598 | DR248743 | AW934361 | BI923955 | EE038034 | EC899224 |
| DR260598 | DR248744 | AW934394 | AI489351 | EE038034 | EE158585 |
| DR260598 | DR248745 | AW934401 | AW035895 | EE038140 | EE178342 |
| DR260598 | DR248746 | AW934407 | AI771242 | EE038141 | EE030681 |
| DR260598 | DR248751 | AW934443 | AW737933 | EE038198 | EE047682 |
| DR260598 | DR248753 | AW934455 | AW221047 | EE038360 | EC888960 |
| DR260598 | DR248755 | AW934473 | BI933865 | EE038405 | EC891653 |
| DR260598 | DR248756 | AW934516 | BG129317 | EE038441 | EE168457 |
| DR260598 | DR248758 | AW944761 | AI486729 | EE038456 | EE173656 |
| DR260598 | DR248760 | AW944761 | AI487087 | EE038554 | EE013466 |
| DR260598 | DR248762 | AW944761 | AI489490 | EE038589 | EE189432 |
| DR260598 | DR248763 | AW944761 | AI894882 | EE038648 | EE179702 |
| DR260598 | DR248765 | AW944761 | AW036659 | EE038708 | EE152555 |
| DR260598 | DR248766 | AW944761 | AW934414 | EE038708 | EE152920 |
| DR260598 | DR248767 | AW944761 | BE353421 | EE038790 | EE175727 |
| DR260598 | DR248768 | AW944761 | BE462171 | EE039072 | EE019689 |
| DR260598 | DR248769 | AW944761 | BG127303 | EE039133 | EE025337 |
| DR260598 | DR248770 | AW944761 | BI923765 | EE039133 | EE165951 |
| DR260598 | DR248771 | AW944761 | BI923771 | EE039250 | EC897581 |

|          |          |          |          |          |          |
|----------|----------|----------|----------|----------|----------|
| DR260598 | DR248772 | AW944761 | BI928769 | EE039301 | EE295377 |
| DR260598 | DR248773 | AW944761 | BI930883 | EE039382 | EC905708 |
| DR260598 | DR248776 | AW944783 | BE459185 | EE039617 | EC892086 |
| DR260598 | DR248778 | AW944783 | BI930131 | EE039672 | EC891743 |
| DR260598 | DR248783 | AW944944 | AW932406 | EE039689 | CD485144 |
| DR260598 | DR248785 | AW944995 | BE459185 | EE039875 | EE157989 |
| DR260598 | DR248832 | AW945003 | AW624407 | EE039883 | EE175725 |
| DR260598 | DR248833 | AW945085 | AW933726 | EE040049 | DV027964 |
| DR260598 | DR248835 | AW979398 | BI932608 | EE040177 | EE187489 |
| DR260598 | DR248838 | AW979596 | BG644109 | EE040212 | EE170595 |
| DR260598 | DR248839 | AW979646 | AW033709 | EE040230 | CO52014  |
| DR260598 | DR281412 | AW979646 | AW035890 | EE040275 | EE016023 |
| DR260598 | DR288129 | AW979646 | AW737774 | EE040558 | EC888266 |
| DR260598 | DR353298 | AW979646 | AW738574 | EE040593 | EC875334 |
| DR261762 | DR273329 | AW979646 | BI422943 | EE040617 | EC873519 |
| DR261762 | DR273334 | AW979646 | BI921753 | EE040819 | DR814975 |
| DR262225 | DR365466 | AW979646 | BI922558 | EE040973 | EE167448 |
| DR262225 | DR365467 | AW979879 | AW030367 | EE041237 | EC902164 |
| DR262225 | DR365469 | AW979990 | AW737933 | EE041253 | EE026945 |
| DR262226 | DR365466 | AW979997 | BI926413 | EE041290 | EE018932 |
| DR262227 | DR365466 | AW980030 | AI483457 | EE041333 | CO52638  |
| DR262227 | DR365467 | AW980124 | BI926695 | EE041333 | DV530082 |
| DR262227 | DR365469 | BE344393 | AI487557 | EE041333 | EC905547 |
| DR263124 | DR227550 | BE344393 | AI771576 | EE041431 | EE170269 |
| DR263124 | DR227551 | BE344469 | AI489351 | EE041446 | EE024748 |
| DR263124 | DR227552 | BE344477 | AW621199 | EE041447 | DR827781 |
| DR263124 | DR227557 | BE344513 | AW034261 | EE041447 | DV519390 |
| DR263124 | DR227560 | BE353360 | BG130131 | EE041589 | EC884343 |
| DR263124 | DR227569 | BE353400 | AW622742 | EE041665 | EB408986 |
| DR263124 | DR227573 | BE353400 | AW648800 | EE041718 | EC898987 |
| DR263124 | DR227590 | BE353474 | BI928261 | EE041962 | EE189831 |
| DR263124 | DR227606 | BE353580 | AW033536 | EE041978 | EE172407 |
| DR263124 | DR227621 | BE353580 | AW931782 | EE042075 | DR824802 |
| DR263124 | DR227633 | BE353580 | BI923518 | EE042235 | EC883537 |
| DR263124 | DR245243 | BE353635 | BG124906 | EE042265 | EE010427 |
| DR263124 | DR245244 | BE353637 | AW034030 | EE042423 | EC886744 |
| DR263124 | DR245287 | BE353641 | BI922590 | EE042423 | EE038144 |
| DR263124 | DR245303 | BE353775 | BE354470 | EE042550 | EE158306 |
| DR263124 | DR245311 | BE353807 | BG134468 | EE042551 | EC891991 |
| DR263124 | DR245324 | BE353825 | BI932844 | EE042556 | EB674931 |
| DR263124 | DR245325 | BE353928 | BI933676 | EE042759 | EC898292 |
| DR263124 | DR245424 | BE353928 | BI934201 | EE042927 | EE165951 |
| DR263124 | DR245513 | BE353928 | BI934477 | EE043068 | EE046914 |
| DR263124 | DR245539 | BE354060 | BG126032 | EE043415 | EE287454 |
| DR263124 | DR245587 | BE354083 | AW623267 | EE043418 | EC893831 |
| DR263124 | DR245644 | BE354107 | AI487642 | EE043426 | EE172929 |
| DR263124 | DR245705 | BE354107 | AW624834 | EE043444 | EE291646 |
| DR263124 | DR245749 | BE354188 | AW737768 | EE043526 | EE188302 |
| DR263124 | DR245776 | BE354188 | BI933641 | EE043529 | EE046108 |
| DR263124 | DR245789 | BE354188 | BI934074 | EE043529 | EE047081 |
| DR263124 | DR245831 | BE354610 | AW735906 | EE043662 | CO51939  |
| DR263124 | DR263107 | BE354620 | BI926371 | EE043686 | EE035512 |

|          |          |          |          |          |          |
|----------|----------|----------|----------|----------|----------|
| DR263178 | DR362747 | BE354620 | BI926549 | EE043723 | DT653146 |
| DR263477 | DR359309 | BE354624 | AW032822 | EE043792 | EE294954 |
| DR263478 | DR359309 | BE354675 | BI934857 | EE043809 | EE034066 |
| DR263479 | DR359309 | BE354711 | BG124906 | EE043992 | EE021291 |
| DR263481 | DR359309 | BE354776 | AW934629 | EE044058 | EE011082 |
| DR263482 | DR359309 | BE354776 | BE449957 | EE044098 | EE292999 |
| DR263483 | DR359309 | BE354776 | BG129610 | EE044103 | EC876921 |
| DR263541 | DR363257 | BE354776 | BG132438 | EE044119 | EE157019 |
| DR263545 | DR363257 | BE354776 | BG134321 | EE044126 | EE032202 |
| DR270198 | DR274478 | BE354776 | BI423325 | EE044126 | EE044888 |
| DR270198 | DR274510 | BE354776 | BI926523 | EE044452 | EE025081 |
| DR270198 | DR361033 | BE354776 | BI927951 | EE044470 | EE153090 |
| DR271232 | DR271244 | BE354776 | BI934909 | EE044585 | EE183750 |
| DR271278 | DR271244 | BE354783 | BE458997 | EE044615 | EE152573 |
| DR271859 | DR226318 | BE354819 | AI771528 | EE044645 | EE184287 |
| DR272407 | DR369768 | BE354853 | BI423371 | EE044651 | EE016799 |
| DR272416 | DR369768 | BE354892 | AW221047 | EE044794 | DR960678 |
| DR272511 | DR369768 | BE354907 | BE451587 | EE044794 | DV532861 |
| DR273474 | DR363963 | BE441135 | BG642751 | EE044794 | DV532862 |
| DR274112 | DR342095 | BE449683 | BI933918 | EE044794 | DY623287 |
| DR274341 | DR355774 | BE449728 | BI925418 | EE044794 | EE024703 |
| DR274359 | DR355774 | BE449733 | BE462509 | EE044794 | EE166460 |
| DR274379 | DR355774 | BE449756 | BI924694 | EE044808 | EE156350 |
| DR274400 | DR355774 | BE449809 | AI894986 | EE044860 | EE159441 |
| DR274431 | DR355774 | BE449829 | BI932127 | EE045014 | EC875441 |
| DR274432 | DR355774 | BE449876 | AI489351 | EE045022 | EE176653 |
| DR274434 | DR355774 | BE449987 | AI483457 | EE045188 | DV518999 |
| DR274436 | DR355774 | BE450046 | BI928077 | EE045244 | EE177772 |
| DR274439 | DR355774 | BE450062 | AI489351 | EE045453 | DY621085 |
| DR274445 | DR355774 | BE450234 | BI932608 | EE045468 | EC899714 |
| DR274447 | DR355774 | BE450267 | BI924813 | EE045561 | EE046452 |
| DR274449 | DR355774 | BE450268 | BG133618 | EE045582 | EE172987 |
| DR274473 | DR355774 | BE450282 | BG133871 | EE045703 | EE286337 |
| DR274474 | DR355774 | BE450353 | AW219693 | EE045735 | EE046098 |
| DR274482 | DR355774 | BE450353 | AW220030 | EE045760 | EC890097 |
| DR274484 | DR355774 | BE450353 | AW224679 | EE045890 | EC874364 |
| DR274487 | DR355774 | BE450353 | AW930274 | EE045976 | EE042215 |
| DR274506 | DR355774 | BE450353 | AW934021 | EE046030 | DY689342 |
| DR274508 | DR355774 | BE450353 | AW979594 | EE046249 | EE157735 |
| DR274511 | DR355774 | BE450353 | BE450602 | EE046328 | EE030425 |
| DR275248 | DR360743 | BE450353 | BI421759 | EE046328 | EE163626 |
| DR275249 | DR382295 | BE450469 | BI423375 | EE046534 | EE010800 |
| DR275483 | DR275468 | BE450695 | AW034447 | EE046534 | EE160660 |
| DR275564 | DR238138 | BE450695 | AW034590 | EE046556 | EE012291 |
| DR275564 | DR238141 | BE450695 | AW035247 | EE046572 | EC889157 |
| DR275564 | DR238142 | BE450695 | AW217137 | EE046676 | EE177774 |
| DR275564 | DR238145 | BE450695 | AW621307 | EE046694 | EE179938 |
| DR275564 | DR238146 | BE450695 | BI421369 | EE046917 | EC904672 |
| DR275564 | DR238148 | BE450697 | AI482890 | EE046928 | EC892154 |
| DR275564 | DR238149 | BE450697 | AW735919 | EE047039 | EE165771 |
| DR275564 | DR238151 | BE450697 | AW931341 | EE047055 | EE030874 |
| DR275564 | DR238155 | BE450697 | BE354189 | EE047246 | EE157019 |

|          |          |          |          |          |          |
|----------|----------|----------|----------|----------|----------|
| DR275564 | DR238156 | BE450697 | BI923537 | EE047450 | EE043744 |
| DR275564 | DR238158 | BE450697 | BI925548 | EE047642 | EC881746 |
| DR275564 | DR238163 | BE450697 | BI925778 | EE047810 | EE179719 |
| DR275564 | DR238167 | BE450745 | AW624336 | EE047810 | EE180669 |
| DR275564 | DR238172 | BE450745 | BI924176 | EE047834 | EE162459 |
| DR275564 | DR238176 | BE450834 | AW931340 | EE048119 | EC898047 |
| DR275564 | DR238177 | BE450997 | AW219836 | EE048217 | EE177349 |
| DR275564 | DR238178 | BE450997 | AW621213 | EE048346 | DV535633 |
| DR275564 | DR238187 | BE450997 | AW649096 | EE048373 | DR814975 |
| DR275564 | DR238188 | BE450997 | BE450357 | EE048373 | EE187478 |
| DR275564 | DR238189 | BE450997 | BI927051 | EE048577 | DR964040 |
| DR275564 | DR238196 | BE450997 | BI930562 | EE048577 | EB166250 |
| DR275564 | DR238199 | BE450997 | BI931738 | EE152416 | EC895345 |
| DR275564 | DR238201 | BE451011 | AI485051 | EE152518 | EE182039 |
| DR275564 | DR238210 | BE451011 | AI489351 | EE152539 | EC882147 |
| DR275564 | DR238212 | BE451051 | AI777028 | EE152675 | EE161316 |
| DR275564 | DR238213 | BE451051 | AI777029 | EE152690 | DN223581 |
| DR275564 | DR238214 | BE451051 | AW030472 | EE152710 | EE158306 |
| DR275564 | DR238215 | BE451051 | AW218888 | EE152802 | EC881018 |
| DR275564 | DR238216 | BE451051 | AW219371 | EE152979 | EE031384 |
| DR275564 | DR238223 | BE451051 | AW219638 | EE152983 | EE021014 |
| DR275564 | DR238224 | BE451051 | AW220682 | EE153054 | EC885923 |
| DR275564 | DR238226 | BE451051 | AW455296 | EE153167 | EE164028 |
| DR275564 | DR238229 | BE451051 | AW621298 | EE153179 | EE284762 |
| DR275564 | DR238233 | BE451051 | AW930259 | EE153251 | DV031131 |
| DR275564 | DR238234 | BE451051 | AW930829 | EE153253 | EC874006 |
| DR275564 | DR238236 | BE451051 | AW931250 | EE153287 | EE158306 |
| DR275564 | DR238240 | BE451051 | AW931324 | EE153584 | EC879930 |
| DR275564 | DR238242 | BE451051 | AW931883 | EE153594 | EC887367 |
| DR275564 | DR238245 | BE451051 | AW932168 | EE153594 | EE025633 |
| DR275564 | DR238249 | BE451051 | AW932423 | EE153594 | EE036350 |
| DR275564 | DR238252 | BE451051 | AW933210 | EE153594 | EE158220 |
| DR275564 | DR238253 | BE451051 | AW933859 | EE153594 | EE161308 |
| DR275564 | DR238259 | BE451051 | AW934197 | EE153595 | EC893099 |
| DR275564 | DR238263 | BE451051 | BF051632 | EE153660 | EE190753 |
| DR275564 | DR238279 | BE451051 | BI921841 | EE153793 | EC881425 |
| DR275564 | DR238280 | BE451107 | AW036711 | EE153793 | EE182473 |
| DR275564 | DR238281 | BE451107 | AW220030 | EE154026 | DV526301 |
| DR275564 | DR238285 | BE451107 | AW224679 | EE154157 | EC874745 |
| DR275564 | DR238288 | BE451107 | AW622214 | EE154240 | EC888960 |
| DR275564 | DR238290 | BE451107 | AW932357 | EE154443 | EE037898 |
| DR275564 | DR238291 | BE451107 | BI421759 | EE155278 | EE170522 |
| DR275564 | DR238292 | BE451179 | AI489400 | EE155318 | EE177003 |
| DR275564 | DR238293 | BE451247 | AI895782 | EE155346 | EC892208 |
| DR275564 | DR238294 | BE451308 | AW218307 | EE155432 | EC887295 |
| DR275564 | DR238295 | BE451308 | AW219816 | EE155445 | EE027791 |
| DR275564 | DR238296 | BE451308 | AW220400 | EE155785 | EC893329 |
| DR275564 | DR238297 | BE451308 | AW621616 | EE155974 | EE187489 |
| DR275564 | DR238300 | BE451308 | AW624891 | EE156292 | EE035690 |
| DR275564 | DR238303 | BE451308 | AW625057 | EE156489 | EC878602 |
| DR275564 | DR238304 | BE451332 | BE353579 | EE156504 | EE019618 |
| DR275564 | DR238305 | BE451370 | AI485843 | EE156530 | EE027701 |

|          |          |          |          |          |          |
|----------|----------|----------|----------|----------|----------|
| DR275564 | DR238306 | BE451370 | BF114061 | EE156530 | EE044756 |
| DR275564 | DR238307 | BE451370 | BG134360 | EE156658 | EC892633 |
| DR275564 | DR238308 | BE451370 | BG134807 | EE156667 | EE169321 |
| DR275564 | DR238309 | BE451377 | BI928077 | EE156695 | EE172340 |
| DR275564 | DR238311 | BE451413 | BI927478 | EE156717 | EE174587 |
| DR275564 | DR238313 | BE451476 | BI927147 | EE156721 | EE182147 |
| DR275564 | DR238343 | BE451521 | AI490979 | EE156727 | EE176047 |
| DR275564 | DR238347 | BE451521 | BG125764 | EE156879 | EE173739 |
| DR275564 | DR238348 | BE451567 | BG129850 | EE156881 | EE017180 |
| DR275564 | DR238350 | BE451588 | BI922101 | EE156998 | EE294828 |
| DR275564 | DR238357 | BE451589 | BI922101 | EE157020 | EC880296 |
| DR275564 | DR238361 | BE451607 | BI928753 | EE157020 | EE014246 |
| DR275564 | DR238362 | BE451705 | AW649717 | EE157194 | EE037861 |
| DR275564 | DR238363 | BE451705 | BI421619 | EE157346 | EC901608 |
| DR275564 | DR238364 | BE458209 | AI489351 | EE157524 | EE046853 |
| DR275564 | DR238365 | BE458210 | BI927708 | EE157560 | EE291717 |
| DR275564 | DR238366 | BE458270 | BF051918 | EE157704 | EE180819 |
| DR275564 | DR238367 | BE458285 | AW032972 | EE157704 | EE289728 |
| DR275564 | DR238368 | BE458313 | BE354179 | EE157810 | EE030285 |
| DR275564 | DR238369 | BE458345 | AI894582 | EE157810 | EE181003 |
| DR275564 | DR238371 | BE458345 | AW032867 | EE157876 | EC876300 |
| DR275564 | DR238372 | BE458345 | AW036668 | EE158031 | EE157019 |
| DR275564 | DR238375 | BE458345 | AW217123 | EE158069 | EE287425 |
| DR275564 | DR238377 | BE458345 | AW220469 | EE158115 | EE291584 |
| DR275564 | DR238378 | BE458345 | AW220470 | EE158163 | EE293077 |
| DR275564 | DR238379 | BE458345 | AW221231 | EE158191 | EE187006 |
| DR275564 | DR238382 | BE458345 | AW221305 | EE158191 | EE292496 |
| DR275564 | DR238387 | BE458345 | AW738206 | EE158199 | EC906106 |
| DR275564 | DR238390 | BE458345 | AW931222 | EE158393 | EE286442 |
| DR275564 | DR238391 | BE458345 | AW932343 | EE158476 | EE039412 |
| DR275564 | DR238392 | BE458345 | AW934267 | EE158487 | EE173616 |
| DR275564 | DR238393 | BE458345 | AW934379 | EE158637 | EE020539 |
| DR275564 | DR238394 | BE458345 | BE459094 | EE158637 | EE292391 |
| DR275564 | DR238395 | BE458345 | BF050613 | EE158672 | EC881885 |
| DR275564 | DR238397 | BE458345 | BF051148 | EE158778 | EC895411 |
| DR275564 | DR238398 | BE458426 | BE451023 | EE159121 | EE162953 |
| DR275564 | DR238400 | BE458443 | AI487153 | EE159213 | EC873501 |
| DR275564 | DR238403 | BE458443 | AI896759 | EE159232 | EE152730 |
| DR275564 | DR238404 | BE458444 | AI894582 | EE159241 | DN211004 |
| DR275564 | DR238405 | BE458444 | AW031918 | EE159257 | EE184002 |
| DR275564 | DR238406 | BE458444 | AW032867 | EE159423 | CB331495 |
| DR275564 | DR238407 | BE458444 | AW036668 | EE159453 | EE292905 |
| DR275564 | DR238408 | BE458444 | AW217123 | EE159510 | EC881163 |
| DR275564 | DR238410 | BE458444 | AW220469 | EE159544 | EE287807 |
| DR275564 | DR238411 | BE458444 | AW220470 | EE160029 | EE027283 |
| DR275564 | DR238412 | BE458444 | AW220625 | EE160066 | EC872537 |
| DR275564 | DR238413 | BE458444 | AW221231 | EE160088 | EE171000 |
| DR275564 | DR238414 | BE458444 | AW221303 | EE160117 | EE013923 |
| DR275564 | DR238415 | BE458444 | AW221305 | EE160268 | EE041552 |
| DR275564 | DR238417 | BE458444 | AW221417 | EE160268 | EE164181 |
| DR275564 | DR238419 | BE458444 | AW649406 | EE160268 | EE168733 |
| DR275564 | DR238491 | BE458444 | AW738206 | EE160403 | EE043352 |



|          |          |          |          |          |          |
|----------|----------|----------|----------|----------|----------|
| DR275564 | DR238492 | BE458444 | AW931222 | EE160409 | EE153673 |
| DR275564 | DR238494 | BE458444 | AW932208 | EE160409 | EE170862 |
| DR275564 | DR238500 | BE458444 | AW932343 | EE160625 | EE014350 |
| DR275564 | DR238501 | BE458444 | AW933380 | EE160653 | EC891558 |
| DR275564 | DR238502 | BE458444 | AW934267 | EE160742 | EE286939 |
| DR275564 | DR238503 | BE458444 | AW934379 | EE160764 | EE294422 |
| DR275564 | DR364696 | BE458444 | BE459094 | EE160830 | DY619277 |
| DR275564 | DR364703 | BE458444 | BE459849 | EE161053 | EC878548 |
| DR275564 | DR364705 | BE458444 | BE459947 | EE161053 | EE042567 |
| DR275564 | DR364706 | BE458444 | BE460004 | EE161150 | EC898036 |
| DR275564 | DR364719 | BE458444 | BE460151 | EE161150 | EE290683 |
| DR275564 | DR364728 | BE458444 | BF050613 | EE161161 | EC902453 |
| DR275564 | DR364730 | BE458444 | BF051148 | EE161173 | EE158306 |
| DR275564 | DR364731 | BE458444 | BF051442 | EE161218 | EC895308 |
| DR275564 | DR364735 | BE458444 | BF051996 | EE161303 | EE185230 |
| DR275564 | DR364746 | BE458444 | BG131310 | EE161308 | EE026797 |
| DR275564 | DR364748 | BE458518 | AI486729 | EE161331 | EE013892 |
| DR275564 | DR364755 | BE458518 | AI487087 | EE161528 | EC875033 |
| DR275564 | DR364756 | BE458518 | AI894882 | EE161661 | BG349636 |
| DR275564 | DR364766 | BE458518 | AW035892 | EE161765 | EE013748 |
| DR275564 | DR364767 | BE458518 | AW623257 | EE161765 | EE171323 |
| DR275564 | DR368519 | BE458518 | BE353421 | EE162186 | EC892839 |
| DR276181 | DR226071 | BE458518 | BI923771 | EE162199 | EE166126 |
| DR276181 | DR242755 | BE458518 | BI928432 | EE162215 | EC888306 |
| DR276181 | DR242767 | BE458518 | BI928769 | EE162294 | EE018201 |
| DR276181 | DR242768 | BE458554 | BG643997 | EE162298 | EC878031 |
| DR276181 | DR260669 | BE458572 | BI921785 | EE162399 | EE292863 |
| DR276181 | DR260673 | BE458576 | AW934308 | EE162447 | EE024243 |
| DR277625 | DR350834 | BE458612 | AI489351 | EE162563 | EC898292 |
| DR277628 | DR350834 | BE458614 | BI925743 | EE162598 | DV170019 |
| DR277629 | DR350834 | BE458614 | BI926425 | EE162730 | EE039362 |
| DR277630 | DR350834 | BE458707 | AI482763 | EE162752 | CO52717  |
| DR277632 | DR350834 | BE458737 | AW219300 | EE162752 | DY232074 |
| DR279632 | DR274564 | BE458768 | AW219292 | EE162752 | EC872681 |
| DR279632 | DR274566 | BE458783 | AW934217 | EE162789 | EE183957 |
| DR279634 | DR274564 | BE458812 | AW944950 | EE162857 | DV169855 |
| DR279634 | DR274566 | BE458939 | BG643455 | EE162865 | EC905493 |
| DR280192 | DR276421 | BE458949 | AW224803 | EE162867 | EC884617 |
| DR281516 | DR364917 | BE458966 | AI485051 | EE162947 | EC886811 |
| DR281516 | DR364918 | BE458966 | AI489351 | EE162947 | EE187489 |
| DR281517 | DR364918 | BE458994 | AW934308 | EE163009 | EE023478 |
| DR281517 | DR364919 | BE459027 | AI486978 | EE163399 | EE292155 |
| DR281517 | DR364921 | BE459027 | AW622246 | EE163515 | EE184607 |
| DR281518 | DR364917 | BE459087 | AW219292 | EE163708 | EE040505 |
| DR281518 | DR364918 | BE459129 | AW928368 | EE163774 | EE037837 |
| DR281518 | DR364919 | BE459129 | BG642629 | EE163961 | EE158279 |
| DR282193 | DR354791 | BE459135 | AW032616 | EE165087 | EE156905 |
| DR283419 | DR354786 | BE459288 | AI894582 | EE165087 | EE184027 |
| DR283811 | DR257418 | BE459288 | AW031918 | EE165152 | EE030951 |
| DR283811 | DR257419 | BE459288 | AW032867 | EE165197 | EC902536 |
| DR283811 | DR257423 | BE459288 | AW036668 | EE165197 | EE039687 |
| DR283811 | DR257424 | BE459288 | AW220471 | EE165393 | EC876838 |

|          |          |          |          |          |          |
|----------|----------|----------|----------|----------|----------|
| DR283811 | DR257425 | BE459288 | AW220626 | EE165393 | EE177683 |
| DR283811 | DR257427 | BE459288 | AW220627 | EE165637 | EC889574 |
| DR283811 | DR272349 | BE459288 | AW221260 | EE165680 | EE158306 |
| DR283812 | DR257418 | BE459288 | AW221303 | EE165680 | EE188302 |
| DR283812 | DR257419 | BE459288 | AW221304 | EE165692 | EE290784 |
| DR283812 | DR257422 | BE459288 | AW930744 | EE165755 | EC875952 |
| DR283812 | DR257423 | BE459288 | AW931371 | EE165917 | EC894741 |
| DR283812 | DR257424 | BE459288 | AW932391 | EE166009 | EC900109 |
| DR283812 | DR257425 | BE459288 | AW932488 | EE166191 | EE166967 |
| DR283812 | DR257427 | BE459288 | AW932890 | EE166277 | EE189721 |
| DR283812 | DR272349 | BE459288 | AW932928 | EE166536 | EE170579 |
| DR283813 | DR257419 | BE459288 | BE458480 | EE166601 | EC900034 |
| DR283813 | DR257423 | BE459288 | BE458492 | EE167068 | EC889892 |
| DR283813 | DR257424 | BE459288 | BE459095 | EE167140 | EC903668 |
| DR283813 | DR257427 | BE459288 | BE459116 | EE167175 | EC886555 |
| DR283814 | DR257419 | BE459288 | BE459765 | EE167203 | EE168608 |
| DR283814 | DR257421 | BE459288 | BE459948 | EE167208 | EE291227 |
| DR283814 | DR257423 | BE459288 | BE459962 | EE167264 | EE156671 |
| DR283814 | DR257424 | BE459288 | BE460004 | EE167355 | EE186889 |
| DR283814 | DR257427 | BE459288 | BE460151 | EE167387 | EC875042 |
| DR283815 | DR257418 | BE459288 | BF050757 | EE167401 | EE182020 |
| DR283815 | DR257419 | BE459288 | BF051121 | EE167445 | EE040543 |
| DR283815 | DR257421 | BE459288 | BF051996 | EE167467 | EE169979 |
| DR283815 | DR257422 | BE459288 | BG134561 | EE167467 | EE170167 |
| DR283815 | DR257423 | BE459288 | BG135287 | EE167519 | EC885042 |
| DR283815 | DR257424 | BE459310 | AW031792 | EE167611 | DR829423 |
| DR283815 | DR257425 | BE459310 | AW622642 | EE167611 | DT644117 |
| DR283815 | DR257427 | BE459355 | AW931832 | EE167611 | DV027366 |
| DR283815 | DR257429 | BE459417 | AI487087 | EE167829 | EE024456 |
| DR283816 | DR257418 | BE459417 | AW036659 | EE168018 | DV538331 |
| DR283816 | DR257422 | BE459417 | BE462171 | EE168142 | EE295016 |
| DR283816 | DR257423 | BE459417 | BI923765 | EE168353 | EE013387 |
| DR283816 | DR257424 | BE459428 | BG713789 | EE168485 | EE031865 |
| DR283816 | DR257427 | BE459481 | BG134587 | EE168503 | EE024529 |
| DR283816 | DR257429 | BE459509 | BI923037 | EE168503 | EE176736 |
| DR283816 | DR272349 | BE459561 | AW218549 | EE168686 | CB331336 |
| DR283817 | DR257418 | BE459561 | BG134131 | EE168836 | DY534353 |
| DR283817 | DR257423 | BE459578 | BG129317 | EE168842 | EE023373 |
| DR283817 | DR257424 | BE459668 | AW621917 | EE168917 | EC889318 |
| DR283817 | DR257429 | BE459688 | AI485987 | EE169001 | CO52917  |
| DR283817 | DR272349 | BE459728 | AW979513 | EE169237 | EE014950 |
| DR283819 | DR257418 | BE459842 | BG135105 | EE169245 | EE025548 |
| DR283819 | DR257419 | BE459893 | AI489351 | EE169421 | DT645783 |
| DR283819 | DR257423 | BE459902 | BI928753 | EE169505 | EC886028 |
| DR283819 | DR257425 | BE459914 | BI931952 | EE169642 | DR963094 |
| DR283820 | DR257418 | BE459924 | AI483829 | EE169642 | DR971061 |
| DR283820 | DR257423 | BE459931 | AW934217 | EE169642 | DT939856 |
| DR283820 | DR257425 | BE460027 | BE450344 | EE169642 | DV030627 |
| DR283820 | DR257427 | BE460126 | AW622742 | EE169642 | DV510373 |
| DR283821 | DR257418 | BE462056 | AW735906 | EE169642 | DV510777 |
| DR283821 | DR257419 | BE462081 | AW944825 | EE169642 | DV518176 |
| DR283821 | DR257421 | BE462101 | BI930917 | EE169642 | EB706854 |

|          |          |          |          |          |          |
|----------|----------|----------|----------|----------|----------|
| DR283821 | DR257423 | BE462179 | BI922939 | EE169711 | EE178249 |
| DR283821 | DR257424 | BE462371 | BI926906 | EE169742 | EE187430 |
| DR283821 | DR257425 | BE462386 | AW031744 | EE169762 | EE293067 |
| DR283821 | DR257427 | BE462412 | AW219116 | EE169996 | EE183683 |
| DR283821 | DR257429 | BE462433 | BI421675 | EE170162 | EE027524 |
| DR283821 | DR272349 | BE462541 | BG133871 | EE170192 | EE039039 |
| DR283822 | DR257418 | BE462623 | BG126367 | EE170249 | EE181814 |
| DR283822 | DR257419 | BE462623 | BG130192 | EE170269 | EC879500 |
| DR283822 | DR257423 | BE462748 | AI487625 | EE170302 | EE292421 |
| DR283822 | DR257425 | BE462748 | AI897921 | EE170328 | EC885355 |
| DR283822 | DR257427 | BE462748 | BI926664 | EE170352 | EE041552 |
| DR283824 | DR257418 | BE462748 | BI927564 | EE170352 | EE164181 |
| DR283824 | DR257419 | BE462820 | BG135105 | EE170352 | EE168733 |
| DR283824 | DR257422 | BE462965 | BE460036 | EE170541 | EE180040 |
| DR283824 | DR257423 | BE462973 | BI931505 | EE170648 | EC878767 |
| DR283824 | DR257424 | BE462978 | BG135626 | EE170685 | EC898809 |
| DR283824 | DR257425 | BE462984 | AW621226 | EE170802 | DR961627 |
| DR283824 | DR257427 | BE463014 | BG130131 | EE170802 | DV524174 |
| DR283824 | DR272349 | BE463095 | BI927637 | EE170833 | DV022401 |
| DR283825 | DR257419 | BE463199 | BE462770 | EE171288 | EE046940 |
| DR283825 | DR257421 | BE463200 | AW036020 | EE171603 | EC889597 |
| DR283825 | DR257423 | BE463376 | BI921785 | EE171762 | EE182070 |
| DR283825 | DR257424 | BF050177 | BE460000 | EE171878 | EE182423 |
| DR283825 | DR257427 | BF050280 | BI932956 | EE171920 | EE289438 |
| DR283826 | DR257418 | BF050291 | AW031129 | EE171988 | EC879851 |
| DR283826 | DR257419 | BF050578 | BG131676 | EE172030 | DN204674 |
| DR283826 | DR257423 | BF050582 | AW623303 | EE172096 | CF243966 |
| DR283826 | DR257425 | BF050582 | BI927293 | EE172096 | DT649879 |
| DR283826 | DR257427 | BF050582 | BI933235 | EE172096 | DV533126 |
| DR283829 | DR257418 | BF050601 | AW034396 | EE172215 | EE034890 |
| DR283829 | DR257424 | BF050648 | BG128074 | EE172242 | EE158096 |
| DR283829 | DR257425 | BF050719 | AW979513 | EE172336 | EC875316 |
| DR283829 | DR257427 | BF050924 | BI930836 | EE172336 | EE161883 |
| DR283830 | DR257418 | BF050924 | BI931533 | EE172418 | EE295016 |
| DR283830 | DR257419 | BF051144 | BG713789 | EE172461 | EE047738 |
| DR283830 | DR257421 | BF051154 | BG135524 | EE172529 | EC872952 |
| DR283830 | DR257423 | BF051182 | BI421964 | EE172529 | EE294571 |
| DR283830 | DR257424 | BF051192 | AI491196 | EE172777 | EE011135 |
| DR283830 | DR257425 | BF051217 | BE458997 | EE172849 | EC877292 |
| DR283830 | DR257427 | BF051218 | BE354126 | EE172849 | EC891362 |
| DR283830 | DR257429 | BF051251 | BI926695 | EE172850 | DR960063 |
| DR283830 | DR272349 | BF051258 | AW030195 | EE173001 | EE290343 |
| DR283831 | DR257418 | BF051277 | AW031145 | EE173112 | EE160688 |
| DR283831 | DR257419 | BF051283 | AW030380 | EE173219 | EE171782 |
| DR283831 | DR257425 | BF051309 | AI896624 | EE173225 | EE045015 |
| DR283831 | DR257427 | BF051349 | AW979822 | EE173266 | EE170725 |
| DR283833 | DR257418 | BF051349 | BI927239 | EE173516 | EE285183 |
| DR283833 | DR257419 | BF051444 | AI894582 | EE173586 | EC885846 |
| DR283833 | DR257421 | BF051444 | AW032867 | EE173983 | EE022809 |
| DR283833 | DR257423 | BF051444 | AW220627 | EE174075 | EC878218 |
| DR283833 | DR257424 | BF051444 | AW931371 | EE174075 | EC888961 |
| DR283833 | DR257425 | BF051444 | AW932928 | EE174111 | EE025137 |

|          |          |          |          |          |          |
|----------|----------|----------|----------|----------|----------|
| DR283833 | DR257427 | BF051444 | BE459116 | EE174190 | EE015341 |
| DR285797 | DR262869 | BF051444 | BE459765 | EE174212 | EC901925 |
| DR285798 | DR262869 | BF051444 | BE459948 | EE174301 | EC892760 |
| DR285801 | DR262869 | BF051444 | BE459962 | EE174412 | DV539962 |
| DR286980 | DR209580 | BF051444 | BE460004 | EE174836 | EE158306 |
| DR286980 | DR209633 | BF051444 | BF050757 | EE174938 | EE045484 |
| DR287377 | DR344427 | BF051444 | BF051121 | EE174959 | DR958676 |
| DR287380 | DR344427 | BF051444 | BF051996 | EE174988 | EE168325 |
| DR287381 | DR344427 | BF051444 | BG135287 | EE175006 | EC883527 |
| DR287382 | DR344427 | BF051557 | AW979822 | EE175042 | EE013788 |
| DR287383 | DR344427 | BF051568 | BE458477 | EE175102 | EE025593 |
| DR287384 | DR344427 | BF051568 | BE459788 | EE175129 | DV166500 |
| DR287385 | DR344427 | BF051589 | AW036668 | EE175182 | EC896083 |
| DR287387 | DR344427 | BF051589 | AW216991 | EE175254 | EE034215 |
| DR287398 | DR344427 | BF051589 | AW217009 | EE175384 | EE158220 |
| DR287402 | DR344427 | BF051589 | AW217123 | EE175431 | EC878398 |
| DR287448 | DR344427 | BF051589 | AW220470 | EE175431 | EC898132 |
| DR287450 | DR344427 | BF051589 | AW220471 | EE175454 | EE169872 |
| DR287451 | DR344427 | BF051589 | AW220626 | EE175742 | EE019640 |
| DR287452 | DR344427 | BF051589 | AW220627 | EE175927 | DN212249 |
| DR287454 | DR344427 | BF051589 | AW221303 | EE175928 | DN212249 |
| DR287456 | DR344427 | BF051589 | AW221304 | EE175974 | EE022001 |
| DR287460 | DR344427 | BF051589 | AW221305 | EE175974 | EE040680 |
| DR287467 | DR344427 | BF051589 | AW221417 | EE175974 | EE176335 |
| DR287469 | DR344427 | BF051589 | AW624836 | EE176137 | EE157864 |
| DR287496 | DR344427 | BF051589 | AW738206 | EE176431 | EC893173 |
| DR287499 | DR344427 | BF051589 | AW930744 | EE176435 | DR816152 |
| DR287506 | DR344427 | BF051589 | AW931371 | EE176464 | EC872335 |
| DR287510 | DR344427 | BF051589 | AW933380 | EE176496 | EE186296 |
| DR287523 | DR344427 | BF051589 | AW934379 | EE176803 | EE153720 |
| DR287524 | DR344427 | BF051589 | BE441121 | EE176803 | EE172739 |
| DR287547 | DR344427 | BF051589 | BE458480 | EE176922 | EE159550 |
| DR288201 | DR363223 | BF051589 | BE458945 | EE176935 | EE190753 |
| DR288201 | DR363224 | BF051589 | BE459535 | EE177060 | EE047157 |
| DR288202 | DR363223 | BF051589 | BE459947 | EE177060 | EE155126 |
| DR288202 | DR363224 | BF051589 | BE459948 | EE177295 | EC886555 |
| DR288204 | DR363223 | BF051589 | BE459962 | EE177320 | EE043439 |
| DR288205 | DR363223 | BF051589 | BF051996 | EE177710 | EE168596 |
| DR288205 | DR363224 | BF051589 | BG131745 | EE177737 | DR813891 |
| DR288206 | DR363223 | BF051589 | BG132220 | EE177744 | EE042843 |
| DR288207 | DR363223 | BF051589 | BG134561 | EE177744 | EE286067 |
| DR288210 | DR363223 | BF051589 | BI422774 | EE177757 | EC888614 |
| DR288211 | DR363223 | BF051602 | AI894582 | EE177773 | EE190707 |
| DR288211 | DR363224 | BF051602 | AW032867 | EE177938 | EE179820 |
| DR288212 | DR363223 | BF051602 | AW036668 | EE178084 | EE179343 |
| DR288215 | DR363223 | BF051602 | AW217123 | EE178100 | EE030874 |
| DR288216 | DR363223 | BF051602 | AW220469 | EE178119 | EE156995 |
| DR288217 | DR363223 | BF051602 | AW220470 | EE178139 | EC892933 |
| DR288218 | DR363223 | BF051602 | AW220471 | EE178223 | EE288067 |
| DR288218 | DR363224 | BF051602 | AW220626 | EE178484 | CB616994 |
| DR288220 | DR363223 | BF051602 | AW221231 | EE178484 | CD568813 |
| DR288220 | DR363224 | BF051602 | AW221303 | EE178484 | DN208808 |

|          |          |          |          |          |          |
|----------|----------|----------|----------|----------|----------|
| DR288221 | DR363223 | BF051602 | AW221305 | EE178484 | DN217777 |
| DR288221 | DR363224 | BF051602 | AW221417 | EE178484 | EE022514 |
| DR288982 | DR368559 | BF051602 | AW624836 | EE178531 | EE165017 |
| DR293492 | DR220336 | BF051602 | AW738206 | EE178636 | EE164883 |
| DR294115 | DR243874 | BF051602 | AW931222 | EE179187 | EE013257 |
| DR294514 | DR369768 | BF051602 | AW931371 | EE179279 | DY534353 |
| DR294521 | DR369768 | BF051602 | AW932343 | EE179465 | EC881364 |
| DR294524 | DR369768 | BF051602 | AW933175 | EE179639 | EB166900 |
| DR294525 | DR369768 | BF051602 | AW933203 | EE179645 | EC905983 |
| DR294545 | DR369768 | BF051602 | AW933380 | EE179733 | EB674169 |
| DR294549 | DR369768 | BF051602 | AW934267 | EE179782 | EE161098 |
| DR294556 | DR369768 | BF051602 | AW934379 | EE179946 | EC891497 |
| DR294557 | DR369768 | BF051602 | BE458480 | EE180029 | EC885428 |
| DR294558 | DR369768 | BF051602 | BE459094 | EE180042 | EE285628 |
| DR294562 | DR369768 | BF051602 | BE459948 | EE180157 | EE042668 |
| DR294563 | DR369768 | BF051602 | BE459962 | EE180208 | EC898974 |
| DR294568 | DR369768 | BF051602 | BF050613 | EE180495 | EC899974 |
| DR294574 | DR369768 | BF051602 | BF051148 | EE180621 | EC884225 |
| DR294618 | DR369768 | BF051602 | BG134561 | EE180859 | EE029316 |
| DR294620 | DR369768 | BF051602 | BG135453 | EE180908 | EC886276 |
| DR294632 | DR369768 | BF051602 | BI422774 | EE180956 | DV531595 |
| DR294634 | DR369768 | BF051670 | AW944931 | EE180956 | DY233268 |
| DR294635 | DR369768 | BF051691 | AI489351 | EE180965 | EC886137 |
| DR294638 | DR369768 | BF051817 | AW934217 | EE181103 | EC875040 |
| DR294639 | DR369768 | BF051900 | BI423139 | EE181165 | EE025872 |
| DR294640 | DR369768 | BF051939 | AW035342 | EE181561 | EC897567 |
| DR294641 | DR369768 | BF051962 | AW979513 | EE181657 | EE168986 |
| DR294646 | DR369768 | BF051972 | BI921804 | EE181688 | EE185548 |
| DR294649 | DR369768 | BF051974 | BE458997 | EE181804 | DN224646 |
| DR294650 | DR369768 | BF052006 | AI489351 | EE181989 | EE048208 |
| DR294651 | DR369768 | BF052063 | AI898712 | EE182094 | EC886811 |
| DR294652 | DR369768 | BF052101 | AW979385 | EE182094 | EE187489 |
| DR294653 | DR369768 | BF052139 | AI489351 | EE182167 | DN225777 |
| DR294655 | DR369768 | BF113911 | AI486854 | EE182246 | EE160336 |
| DR294656 | DR369768 | BF113911 | AI487123 | EE182294 | EE022989 |
| DR294680 | DR369768 | BF113911 | AI897379 | EE182343 | EC889723 |
| DR294690 | DR369768 | BF113911 | AI897932 | EE182369 | EE019622 |
| DR294692 | DR369768 | BF113953 | AI489351 | EE182369 | EE286417 |
| DR294693 | DR369768 | BF113980 | AI488118 | EE182384 | EE168846 |
| DR294698 | DR369768 | BF114126 | BG713789 | EE182428 | EE156276 |
| DR294699 | DR369768 | BF114248 | AI489351 | EE182445 | EE011656 |
| DR294700 | DR369768 | BF114386 | AI489351 | EE182445 | EE039488 |
| DR294701 | DR369768 | BF114410 | AI485051 | EE182445 | EE182850 |
| DR294705 | DR369768 | BF114410 | AI489351 | EE182608 | EE012862 |
| DR294706 | DR369768 | BF176493 | BG713789 | EE182671 | EE292219 |
| DR294707 | DR369768 | BF176544 | AI897379 | EE182820 | EE024529 |
| DR294708 | DR369768 | BF176544 | AI899310 | EE182820 | EE025359 |
| DR294711 | DR369768 | BF176568 | AW737933 | EE182820 | EE176736 |
| DR294712 | DR369768 | BF176593 | BG130666 | EE182840 | EE181353 |
| DR294714 | DR369768 | BG123139 | BG129317 | EE182856 | EE048064 |
| DR294715 | DR369768 | BG123329 | AW944790 | EE183100 | EE035208 |
| DR294719 | DR369768 | BG123454 | AI489351 | EE183180 | DR815111 |

|          |          |          |          |          |          |
|----------|----------|----------|----------|----------|----------|
| DR294722 | DR369768 | BG123460 | BE458997 | EE183180 | DT939630 |
| DR294727 | DR369768 | BG123478 | BG128051 | EE183502 | EE293408 |
| DR294730 | DR369768 | BG123479 | BG135888 | EE183523 | EE033935 |
| DR294732 | DR369768 | BG123489 | AW737200 | EE183525 | EE286448 |
| DR294733 | DR369768 | BG123597 | AI482683 | EE183934 | EE178767 |
| DR294734 | DR369768 | BG123597 | AI483102 | EE184528 | EC879887 |
| DR294737 | DR369768 | BG123597 | AI483103 | EE184531 | EE173830 |
| DR294744 | DR369768 | BG123597 | AI484727 | EE184712 | EE172536 |
| DR294745 | DR369768 | BG123597 | AI489216 | EE184756 | EB704054 |
| DR294754 | DR369768 | BG123597 | AI490745 | EE184832 | EE173408 |
| DR294832 | DR369768 | BG123597 | AI491071 | EE184911 | EE021031 |
| DR294834 | DR369768 | BG123597 | AW626168 | EE185052 | EE046853 |
| DR297391 | DR320731 | BG123597 | AW648826 | EE185114 | EC898675 |
| DR298215 | DR262590 | BG123597 | AW650311 | EE185131 | EE291660 |
| DR298291 | DR253635 | BG123597 | AW928750 | EE185238 | EE014085 |
| DR299017 | DR272219 | BG123597 | BE460080 | EE185258 | EC888298 |
| DR299020 | DR272219 | BG123597 | BE460146 | EE185290 | EE168843 |
| DR299021 | DR272219 | BG123597 | BF113809 | EE185363 | EC884135 |
| DR299022 | DR272219 | BG123597 | BG123717 | EE185501 | BG840410 |
| DR299024 | DR272219 | BG123597 | BG123818 | EE185694 | EE045484 |
| DR299037 | DR272219 | BG123597 | BG123948 | EE185771 | EC878185 |
| DR299042 | DR272219 | BG123597 | BG124806 | EE185805 | EE153115 |
| DR299045 | DR272219 | BG123597 | BG124825 | EE185879 | EE042926 |
| DR299046 | DR272219 | BG123597 | BG125505 | EE185879 | EE188484 |
| DR300375 | DR355421 | BG123597 | BG127238 | EE186055 | EE168333 |
| DR300453 | DR355421 | BG123597 | BG127677 | EE186264 | EE293144 |
| DR301117 | DR197347 | BG123597 | BG128025 | EE186303 | EE179100 |
| DR301117 | DR197358 | BG123597 | BG128080 | EE186337 | EC879009 |
| DR302621 | DR354584 | BG123597 | BG128136 | EE186453 | EC884350 |
| DR304705 | DR257225 | BG123597 | BG129467 | EE186461 | EE046914 |
| DR304707 | DR257225 | BG123597 | BG131405 | EE186662 | EE022541 |
| DR304711 | DR257225 | BG123597 | BG643495 | EE186831 | EE188766 |
| DR308293 | DR354845 | BG123597 | BG643911 | EE186923 | EC890780 |
| DR308296 | DR354845 | BG123597 | BI927249 | EE186954 | EE041199 |
| DR309616 | DR368961 | BG123606 | AI484588 | EE186976 | EE158306 |
| DR323333 | DR350826 | BG123606 | AI771567 | EE187386 | DV536140 |
| DR325766 | DR325753 | BG123606 | BI932942 | EE187394 | DR826903 |
| DR327051 | DR183612 | BG123606 | BI935707 | EE187412 | CF647493 |
| DR327051 | DR183613 | BG123614 | AI489351 | EE187458 | EE188259 |
| DR327051 | DR183614 | BG123752 | BI926148 | EE187665 | EC902453 |
| DR327051 | DR183615 | BG123752 | BI931323 | EE187689 | DR808677 |
| DR327051 | DR183616 | BG123854 | AI897744 | EE187992 | EE181500 |
| DR327051 | DR183617 | BG123896 | AW932202 | EE188187 | DR792484 |
| DR327051 | DR183621 | BG123915 | AW623644 | EE188222 | EE036206 |
| DR327051 | DR183622 | BG123915 | AW931545 | EE188295 | EC882658 |
| DR327051 | DR183624 | BG123915 | BG123241 | EE188540 | EE038422 |
| DR327051 | DR183626 | BG123915 | BI929562 | EE188560 | DN230538 |
| DR327051 | DR183627 | BG124034 | AI489351 | EE188746 | DY236400 |
| DR327051 | DR183631 | BG124113 | BI931358 | EE188754 | EE029795 |
| DR327051 | DR183633 | BG124120 | BG123318 | EE188781 | EC885697 |
| DR327051 | DR183634 | BG124120 | BG123888 | EE189110 | EE180392 |
| DR327051 | DR183636 | BG124208 | BG127220 | EE189116 | DY539786 |

|          |          |          |          |          |          |
|----------|----------|----------|----------|----------|----------|
| DR327051 | DR183638 | BG124234 | AI489351 | EE189216 | EC893939 |
| DR327051 | DR183639 | BG124251 | AW033872 | EE189312 | EC903766 |
| DR327051 | DR274803 | BG124251 | BF114095 | EE189322 | EE011531 |
| DR327053 | DR183612 | BG124310 | BI934063 | EE189443 | EE177349 |
| DR327053 | DR183613 | BG124316 | BI930460 | EE189485 | DV020364 |
| DR327053 | DR183614 | BG124350 | BI928991 | EE189506 | DV531595 |
| DR327053 | DR183615 | BG124444 | AW218355 | EE189506 | DY233268 |
| DR327053 | DR183616 | BG124525 | BG124712 | EE189844 | EE160593 |
| DR327053 | DR183617 | BG124534 | BG129317 | EE189844 | EE189711 |
| DR327053 | DR183618 | BG124645 | AW929621 | EE190008 | DR970408 |
| DR327053 | DR183621 | BG124646 | BI921785 | EE190067 | EC884655 |
| DR327053 | DR183622 | BG124693 | AW738359 | EE190176 | EC895345 |
| DR327053 | DR183624 | BG124784 | BG135665 | EE190311 | EC888785 |
| DR327053 | DR183625 | BG124829 | AW622041 | EE190413 | EE153677 |
| DR327053 | DR183626 | BG124839 | AW621544 | EE190440 | EE037920 |
| DR327053 | DR183627 | BG124839 | AW626194 | EE190467 | EE293421 |
| DR327053 | DR183631 | BG124839 | AW735883 | EE190482 | EC886844 |
| DR327053 | DR183633 | BG124839 | BE353782 | EE190763 | DV173699 |
| DR327053 | DR183634 | BG124839 | BI932113 | EE190770 | EC895645 |
| DR327053 | DR183636 | BG124839 | BI932114 | EE190809 | EC901956 |
| DR327053 | DR183638 | BG124839 | BI932635 | EE190809 | EE029410 |
| DR327053 | DR183639 | BG124877 | AI485729 | EE191119 | EC899285 |
| DR327053 | DR183640 | BG124995 | BI921785 | EE191123 | EC903558 |
| DR327053 | DR183641 | BG125064 | AW219693 | EE191151 | EC902394 |
| DR327053 | DR274803 | BG125064 | AW224679 | EE191247 | EE189593 |
| DR327055 | DR183612 | BG125064 | AW621864 | EE191326 | EC874944 |
| DR327055 | DR183613 | BG125064 | AW930274 | EE191503 | DV173012 |
| DR327055 | DR183614 | BG125064 | AW934021 | EE285112 | EE041341 |
| DR327055 | DR183618 | BG125064 | AW979594 | EE285159 | EE022439 |
| DR327055 | DR183622 | BG125064 | AW979976 | EE285209 | EE290275 |
| DR327055 | DR183625 | BG125064 | BE450602 | EE285473 | EE164652 |
| DR327055 | DR183626 | BG125064 | BI421759 | EE285473 | EE169481 |
| DR327055 | DR183627 | BG125152 | AW033727 | EE285473 | EE174559 |
| DR327055 | DR183631 | BG125153 | AI485234 | EE285477 | EC899674 |
| DR327055 | DR183636 | BG125153 | BG135596 | EE285746 | EE293590 |
| DR327055 | DR183638 | BG125323 | AI485987 | EE285753 | EE015084 |
| DR327055 | DR183639 | BG125326 | AW928368 | EE286033 | EE033567 |
| DR327055 | DR183640 | BG125326 | BG642629 | EE286155 | EC878921 |
| DR327055 | DR274804 | BG125364 | AI489351 | EE286164 | EE176649 |
| DR327056 | DR183612 | BG125366 | AW621961 | EE286168 | DR963444 |
| DR327056 | DR183613 | BG125366 | BG127040 | EE286196 | EE178156 |
| DR327056 | DR183614 | BG125460 | AW032939 | EE286328 | EE012454 |
| DR327056 | DR183615 | BG125460 | BG129055 | EE286449 | CB331336 |
| DR327056 | DR183616 | BG125532 | AI898835 | EE286512 | EC896984 |
| DR327056 | DR183617 | BG125532 | AW036565 | EE286600 | EC901777 |
| DR327056 | DR183619 | BG125532 | AW624339 | EE286797 | EE160743 |
| DR327056 | DR183621 | BG125532 | AW651135 | EE286857 | EE152882 |
| DR327056 | DR183622 | BG125532 | AW929849 | EE286923 | EE180392 |
| DR327056 | DR183624 | BG125532 | BI421542 | EE287044 | EE175885 |
| DR327056 | DR183625 | BG125532 | BI933771 | EE287216 | DT653746 |
| DR327056 | DR183626 | BG125543 | BG124451 | EE287280 | EE152627 |
| DR327056 | DR183627 | BG125548 | AI489351 | EE287409 | EE041541 |

|          |          |          |          |          |          |
|----------|----------|----------|----------|----------|----------|
| DR327056 | DR183631 | BG125562 | BG127681 | EE287455 | EE031545 |
| DR327056 | DR183633 | BG125570 | BG643941 | EE287505 | EE179056 |
| DR327056 | DR183634 | BG125661 | BG127595 | EE287612 | EE172703 |
| DR327056 | DR183636 | BG125721 | AI483321 | EE287731 | EE181069 |
| DR327056 | DR183637 | BG125721 | AI484727 | EE287907 | EC877697 |
| DR327056 | DR183638 | BG125721 | AI484891 | EE287920 | EE181606 |
| DR327056 | DR183639 | BG125721 | AI491159 | EE287988 | EC880867 |
| DR327056 | DR183640 | BG125721 | AW623028 | EE287997 | EE289404 |
| DR327056 | DR183641 | BG125721 | AW934500 | EE288119 | DV166784 |
| DR327056 | DR274803 | BG125721 | BF113904 | EE288264 | EE031869 |
| DR327057 | DR183612 | BG125721 | BG127238 | EE288264 | EE035604 |
| DR327057 | DR183613 | BG125721 | BG128935 | EE288283 | EE286398 |
| DR327057 | DR183614 | BG125721 | BG129745 | EE288327 | EC888594 |
| DR327057 | DR183615 | BG125721 | BG130289 | EE288435 | BG840358 |
| DR327057 | DR183616 | BG125721 | BG643495 | EE288498 | EE190186 |
| DR327057 | DR183617 | BG125721 | BG643911 | EE288775 | EE027066 |
| DR327057 | DR183621 | BG125721 | BI927249 | EE288936 | EC875510 |
| DR327057 | DR183622 | BG125772 | BI931733 | EE288986 | EC890428 |
| DR327057 | DR183624 | BG125849 | BE458997 | EE289031 | DV519301 |
| DR327057 | DR183626 | BG125873 | BI932608 | EE289086 | EE028388 |
| DR327057 | DR183627 | BG125894 | BI922637 | EE289153 | DV542084 |
| DR327057 | DR183631 | BG125940 | AW929621 | EE289644 | EE168608 |
| DR327057 | DR183633 | BG125982 | BE458997 | EE289654 | EE046613 |
| DR327057 | DR183634 | BG126108 | AW220096 | EE289930 | EE295463 |
| DR327057 | DR183636 | BG126108 | AW737098 | EE290167 | DV538331 |
| DR327057 | DR183638 | BG126108 | AW934629 | EE290405 | EE182216 |
| DR327057 | DR183639 | BG126108 | BG123462 | EE290481 | EE180982 |
| DR327057 | DR274803 | BG126108 | BG129610 | EE291069 | DY534353 |
| DR327058 | DR183612 | BG126108 | BG130701 | EE291147 | EC889514 |
| DR327058 | DR183613 | BG126108 | BG131107 | EE291178 | EE179637 |
| DR327058 | DR183614 | BG126108 | BG134321 | EE291372 | EE038289 |
| DR327058 | DR183615 | BG126108 | BG134345 | EE291467 | EE286045 |
| DR327058 | DR183616 | BG126108 | BI923627 | EE291543 | EE014014 |
| DR327058 | DR183617 | BG126108 | BI925760 | EE291543 | EE157203 |
| DR327058 | DR183619 | BG126108 | BI926523 | EE291543 | EE164491 |
| DR327058 | DR183622 | BG126108 | BI926623 | EE291633 | EC875568 |
| DR327058 | DR183624 | BG126108 | BI929432 | EE291634 | DT640249 |
| DR327058 | DR183625 | BG126108 | BI931785 | EE291648 | EE188189 |
| DR327058 | DR183626 | BG126108 | BI932715 | EE291825 | EE188302 |
| DR327058 | DR183627 | BG126108 | BI933577 | EE291873 | EE042474 |
| DR327058 | DR183631 | BG126113 | AI489351 | EE291873 | EE157864 |
| DR327058 | DR183633 | BG126129 | BI924077 | EE292105 | EC884877 |
| DR327058 | DR183634 | BG126143 | BI921540 | EE292174 | EC904152 |
| DR327058 | DR183637 | BG126162 | AI486575 | EE292329 | EE034810 |
| DR327058 | DR183638 | BG126172 | AI489351 | EE292466 | EE179702 |
| DR327058 | DR183639 | BG126295 | AI483149 | EE293031 | EE291791 |
| DR327058 | DR183640 | BG126295 | BG129506 | EE293057 | EE010560 |
| DR327058 | DR183641 | BG126409 | AI483272 | EE293523 | EC897989 |
| DR327058 | DR274803 | BG126560 | BI924623 | EE293732 | EE023531 |
| DR327060 | DR183612 | BG126597 | AW033794 | EE294166 | EE176893 |
| DR327060 | DR183614 | BG126655 | AW650050 | EE294436 | EE290757 |
| DR327060 | DR183619 | BG126673 | AW220923 | EE294581 | EE161357 |



|          |          |          |          |                 |          |
|----------|----------|----------|----------|-----------------|----------|
| DR327060 | DR183622 | BG126677 | BG643140 | EE294625        | EC881111 |
| DR327060 | DR183625 | BG126685 | BG124240 | EE294869        | EE180392 |
| DR327060 | DR183627 | BG126789 | AW623723 | EE294970        | EC885741 |
| DR327060 | DR183634 | BG126789 | AW623980 | EE294976        | EE029235 |
| DR327060 | DR183637 | BG126789 | BG128325 | EE295062        | EE166617 |
| DR327060 | DR183638 | BG126789 | BI927074 | EE295117        | EC888322 |
| DR327060 | DR183640 | BG126798 | BG643941 | EE295294        | EE165121 |
| DR327060 | DR183641 | BG126840 | AI482941 | EE295296        | EE165524 |
| DR327060 | DR274803 | BG126840 | AI482950 | EE295349        | EE045704 |
| DR327061 | DR183612 | BG126895 | AI486561 | EE295694        | EE022462 |
| DR327061 | DR183613 | BG126907 | AI489490 | EE295724        | DT649623 |
| DR327061 | DR183614 | BG126907 | AI894882 | EE295770        | EC898192 |
| DR327061 | DR183615 | BG126907 | BI923765 | EE295873        | EE187355 |
| DR327061 | DR183616 | BG126907 | BI923771 | EE295948        | EE169611 |
| DR327061 | DR183619 | BG126907 | BI928769 | W59804          | DY689130 |
| DR327061 | DR183621 | BG126966 | BI931181 | <i>Zea mays</i> | f2       |
| DR327061 | DR183622 | BG126985 | BI932608 | EST1            | EST2     |
| DR327061 | DR183625 | BG127030 | BE449687 | CD967956        | CF040860 |
| DR327061 | DR183626 | BG127042 | AW649925 | CD967956        | CF041871 |
| DR327061 | DR183627 | BG127060 | BI933235 | CD968038        | CD971489 |
| DR327061 | DR183631 | BG127078 | AW649320 | CD968038        | CD971724 |
| DR327061 | DR183633 | BG127078 | BI933271 | CD968038        | CD972215 |
| DR327061 | DR183634 | BG127102 | BI421674 | CD968038        | CD972809 |
| DR327061 | DR183636 | BG127114 | BG135829 | CD968038        | CD975373 |
| DR327061 | DR183637 | BG127155 | BG642767 | CD968038        | CD975927 |
| DR327061 | DR183638 | BG127169 | BG130131 | CD968038        | CD975928 |
| DR327061 | DR183640 | BG127209 | AW624082 | CD968038        | CD976735 |
| DR327061 | DR183641 | BG127219 | BI932634 | CD968038        | CD977399 |
| DR327061 | DR274803 | BG127292 | AI489351 | CD968038        | CD979105 |
| DR327063 | DR183612 | BG127397 | AI489351 | CD968038        | CD979116 |
| DR327063 | DR183613 | BG127444 | AW220189 | CD968038        | CD982868 |
| DR327063 | DR183614 | BG127444 | AW455315 | CD968038        | CF040197 |
| DR327063 | DR183617 | BG127444 | AW933782 | CD968038        | CF058928 |
| DR327063 | DR183622 | BG127481 | BI924598 | CD968038        | CF058934 |
| DR327063 | DR183624 | BG127509 | AI489351 | CD968038        | CF059056 |
| DR327063 | DR183626 | BG127547 | BE449687 | CD968038        | CF059174 |
| DR327063 | DR183627 | BG127660 | AI489351 | CD968038        | CF059182 |
| DR327063 | DR183631 | BG127741 | AW929621 | CD968038        | CF059200 |
| DR327063 | DR183634 | BG127773 | BI929270 | CD968038        | CF059241 |
| DR327063 | DR183636 | BG127800 | AI489351 | CD968038        | CF059264 |
| DR327063 | DR183638 | BG127811 | BG128211 | CD968044        | CD972215 |
| DR327063 | DR183639 | BG127860 | AW929621 | CD968044        | CD975928 |
| DR327063 | DR274803 | BG127906 | AW933726 | CD968044        | CD976094 |
| DR327063 | DR274804 | BG127918 | AI485987 | CD968044        | CD977399 |
| DR327064 | DR183612 | BG127919 | AI482641 | CD968044        | CD978683 |
| DR327064 | DR183613 | BG128064 | AI483448 | CD968044        | CD979105 |
| DR327064 | DR183614 | BG128102 | AW944911 | CD968044        | CD985534 |
| DR327064 | DR183615 | BG128110 | BI927087 | CD968044        | CF059056 |
| DR327064 | DR183622 | BG128122 | BI932764 | CD968044        | CF059174 |
| DR327064 | DR183626 | BG128156 | AW616032 | CD968322        | CF059131 |
| DR327064 | DR183627 | BG128180 | AW621406 | CD968328        | CF059131 |
| DR327064 | DR183631 | BG128220 | BG124240 | CD968565        | CX129530 |

|          |          |          |          |          |          |
|----------|----------|----------|----------|----------|----------|
| DR327064 | DR183636 | BG128254 | AI899232 | CD968691 | CX129530 |
| DR327064 | DR183638 | BG128259 | AW622403 | CD968818 | CX129530 |
| DR327065 | DR183612 | BG128303 | AW626367 | CD969016 | CF059131 |
| DR327065 | DR183613 | BG128303 | BE449846 | CD969131 | CX129530 |
| DR327065 | DR183617 | BG128377 | BG127877 | CD969154 | CF059131 |
| DR327065 | DR183622 | BG128380 | BG129184 | CD969164 | CD999361 |
| DR327065 | DR183624 | BG128433 | AW221375 | CD969164 | CF060421 |
| DR327065 | DR183626 | BG128483 | AW623875 | CD969179 | CF059131 |
| DR327065 | DR183631 | BG128483 | AW651057 | CD969186 | CD999361 |
| DR327065 | DR183634 | BG128483 | AW651058 | CD969186 | CF060421 |
| DR327065 | DR183636 | BG128483 | AW929519 | CD969188 | CF059131 |
| DR327065 | DR183638 | BG128483 | AW944784 | CD969193 | CD974638 |
| DR327065 | DR183639 | BG128483 | BE354320 | CD969324 | CF059131 |
| DR327065 | DR183641 | BG128483 | BG124272 | CD969348 | CF059131 |
| DR327065 | DR274803 | BG128483 | BG125380 | CD969527 | CD974638 |
| DR327065 | DR274804 | BG128483 | BG125421 | CD969528 | CF059131 |
| DR327066 | DR183612 | BG128483 | BG125777 | CD969605 | CF029756 |
| DR327066 | DR183613 | BG128483 | BG126211 | CD969605 | CF029966 |
| DR327066 | DR183614 | BG128483 | BG126221 | CD969776 | CF059131 |
| DR327066 | DR183615 | BG128483 | BG126456 | CD969790 | CF059131 |
| DR327066 | DR183616 | BG128483 | BG126793 | CD969816 | CF059131 |
| DR327066 | DR183617 | BG128483 | BG127086 | CD969824 | CD969661 |
| DR327066 | DR183621 | BG128483 | BG127164 | CD969824 | CD969870 |
| DR327066 | DR183622 | BG128483 | BG128191 | CD969824 | CD969877 |
| DR327066 | DR183624 | BG128483 | BG128245 | CD969824 | CD969930 |
| DR327066 | DR183626 | BG128483 | BG128490 | CD969908 | CD999746 |
| DR327066 | DR183627 | BG128483 | BG132022 | CD969957 | CF059131 |
| DR327066 | DR183631 | BG128483 | BG642708 | CD970060 | CD979256 |
| DR327066 | DR183633 | BG128483 | BG642757 | CD970097 | CD968423 |
| DR327066 | DR183634 | BG128483 | BG642879 | CD970097 | CD968473 |
| DR327066 | DR183636 | BG128483 | BG642941 | CD970097 | CD968874 |
| DR327066 | DR183638 | BG128483 | BG643019 | CD970097 | CD973742 |
| DR327066 | DR183639 | BG128483 | BG643025 | CD970097 | CD984340 |
| DR327066 | DR183640 | BG128483 | BG643258 | CD970097 | CF050890 |
| DR327066 | DR274803 | BG128483 | BG643331 | CD970097 | CF054049 |
| DR327067 | DR183612 | BG128483 | BG643341 | CD970097 | CF056732 |
| DR327067 | DR183613 | BG128483 | BG643347 | CD970127 | CF059851 |
| DR327067 | DR183614 | BG128483 | BG643542 | CD970153 | CF059849 |
| DR327067 | DR183615 | BG128483 | BG643830 | CD970181 | CF059849 |
| DR327067 | DR183616 | BG128483 | BG644023 | CD970222 | CD999361 |
| DR327067 | DR183617 | BG128483 | BI925276 | CD970542 | CD997865 |
| DR327067 | DR183618 | BG128483 | BI928240 | CD970542 | CD999214 |
| DR327067 | DR183622 | BG128510 | BG130608 | CD970542 | CF038366 |
| DR327067 | DR183624 | BG128510 | BG642862 | CD970542 | CF047676 |
| DR327067 | DR183625 | BG128546 | BG643294 | CD970782 | CF040860 |
| DR327067 | DR183626 | BG128626 | AI490794 | CD970909 | CD968423 |
| DR327067 | DR183627 | BG128626 | BG124655 | CD970909 | CD968473 |
| DR327067 | DR183631 | BG128626 | BG124664 | CD970909 | CD968874 |
| DR327067 | DR183633 | BG128626 | BG125395 | CD970909 | CD973742 |
| DR327067 | DR183634 | BG128626 | BG126557 | CD970909 | CD984340 |
| DR327067 | DR183636 | BG128626 | BG126710 | CD970909 | CD984677 |
| DR327067 | DR183638 | BG128626 | BG127097 | CD970909 | CF021668 |

|          |          |          |          |          |          |
|----------|----------|----------|----------|----------|----------|
| DR327067 | DR183639 | BG128626 | BG128059 | CD970909 | CF050890 |
| DR327067 | DR183640 | BG128626 | BG128286 | CD970909 | CF054049 |
| DR327067 | DR274803 | BG128626 | BG129280 | CD970909 | CF056732 |
| DR327068 | DR183612 | BG128626 | BG131054 | CD970932 | CF059849 |
| DR327068 | DR183613 | BG128626 | BG643200 | CD971001 | CD987288 |
| DR327068 | DR183614 | BG128626 | BG643402 | CD971006 | CD985555 |
| DR327068 | DR183615 | BG128626 | BI931716 | CD971071 | CF059131 |
| DR327068 | DR183616 | BG128654 | BG130131 | CD971151 | CD976022 |
| DR327068 | DR183617 | BG128719 | BG135524 | CD971151 | CD976051 |
| DR327068 | DR183624 | BG128729 | BE458997 | CD971151 | CD976517 |
| DR327068 | DR183626 | BG128733 | BI932764 | CD971151 | CD978317 |
| DR327068 | DR183627 | BG128744 | AW649185 | CD971151 | CD979234 |
| DR327068 | DR183631 | BG128750 | AI484418 | CD971151 | CD979235 |
| DR327068 | DR183633 | BG128750 | AI486787 | CD971151 | CD979810 |
| DR327068 | DR183634 | BG128792 | BG132573 | CD971151 | CD979811 |
| DR327068 | DR183636 | BG128940 | AW621479 | CD971151 | CD980980 |
| DR327068 | DR183638 | BG128940 | AW621551 | CD971151 | CD981584 |
| DR327068 | DR183639 | BG128940 | AW624798 | CD971151 | CD981604 |
| DR327068 | DR183640 | BG128940 | BI927294 | CD971151 | CD981605 |
| DR327068 | DR274803 | BG128951 | AW622023 | CD971151 | CD981639 |
| DR327069 | DR183612 | BG128956 | BG643119 | CD971151 | CD981810 |
| DR327069 | DR183613 | BG128956 | BI931773 | CD971151 | CD981811 |
| DR327069 | DR183615 | BG128972 | AW929621 | CD971151 | CD981909 |
| DR327069 | DR183616 | BG128973 | BG135626 | CD971151 | CD981991 |
| DR327069 | DR183617 | BG129022 | BI932145 | CD971151 | CD981992 |
| DR327069 | DR183624 | BG129022 | BI932292 | CD971151 | CD982026 |
| DR327069 | DR183626 | BG129045 | AW622101 | CD971151 | CD982027 |
| DR327069 | DR183631 | BG129062 | AI489351 | CD971151 | CD982355 |
| DR327069 | DR183633 | BG129086 | BG126688 | CD971151 | CD982356 |
| DR327069 | DR183634 | BG129089 | BG130530 | CD971151 | CD982498 |
| DR327069 | DR183638 | BG129098 | BG126438 | CD971151 | CD982581 |
| DR327069 | DR274803 | BG129118 | AW928368 | CD971151 | CD982636 |
| DR327560 | DR327556 | BG129118 | BG642629 | CD971151 | CD982672 |
| DR328086 | DR355428 | BG129127 | AW622101 | CD971151 | CD982675 |
| DR328086 | DR355430 | BG129148 | AI489351 | CD971151 | CD982704 |
| DR328176 | DR368591 | BG129150 | BG643140 | CD971151 | CD982723 |
| DR328178 | DR368591 | BG129150 | BG643941 | CD971151 | CD982767 |
| DR330244 | DR231295 | BG129219 | BF051615 | CD971151 | CD982778 |
| DR330245 | DR231295 | BG129219 | BI928267 | CD971151 | CD982785 |
| DR330247 | DR231295 | BG129219 | BI929692 | CD971151 | CD982796 |
| DR333796 | DR355774 | BG129275 | BG129850 | CD971151 | CD982819 |
| DR333855 | DR355774 | BG129307 | AI483343 | CD971151 | CD982821 |
| DR334810 | DR358928 | BG129307 | AI486525 | CD971151 | CD982825 |
| DR336407 | DR362710 | BG129307 | AI490559 | CD971151 | CD982833 |
| DR336410 | DR362710 | BG129307 | AI899087 | CD971151 | CD982836 |
| DR336426 | DR362710 | BG129307 | AW626147 | CD971151 | CD982848 |
| DR336432 | DR362710 | BG129307 | BG130169 | CD971151 | CD982913 |
| DR337909 | DR365592 | BG129421 | BG130326 | CD971151 | CD982918 |
| DR337909 | DR365593 | BG129441 | AW928368 | CD971151 | CD982954 |
| DR337911 | DR365593 | BG129441 | BG642629 | CD971151 | CD982979 |
| DR338976 | DR197056 | BG129486 | AI489351 | CD971151 | CD982984 |
| DR338976 | DR197069 | BG129626 | BI929655 | CD971151 | CD983009 |

|          |          |          |          |          |          |
|----------|----------|----------|----------|----------|----------|
| DR338976 | DR197070 | BG129690 | AW033003 | CD971151 | CD983021 |
| DR338976 | DR197071 | BG129730 | AI489351 | CD971151 | CD983061 |
| DR338982 | DR197056 | BG129788 | AI489351 | CD971151 | CD983074 |
| DR338982 | DR197069 | BG129817 | AI489351 | CD971151 | CD983090 |
| DR338982 | DR197070 | BG129840 | BG135665 | CD971151 | CD983099 |
| DR338983 | DR197056 | BG129847 | AI487369 | CD971151 | CD983101 |
| DR338983 | DR197069 | BG129847 | BG127000 | CD971151 | CD983105 |
| DR338983 | DR197070 | BG129847 | BG127768 | CD971151 | CD983111 |
| DR338983 | DR197071 | BG129847 | BI925008 | CD971151 | CD983133 |
| DR338984 | DR197056 | BG129883 | AI485051 | CD971151 | CD983143 |
| DR338985 | DR197056 | BG129883 | AI489351 | CD971151 | CD983149 |
| DR338985 | DR197069 | BG129930 | BG124240 | CD971151 | CD983259 |
| DR338985 | DR197070 | BG129960 | AI485051 | CD971151 | CD983264 |
| DR338985 | DR197071 | BG129960 | AI489351 | CD971151 | CD983275 |
| DR339030 | DR197056 | BG129982 | AI483829 | CD971151 | CD983297 |
| DR339030 | DR197069 | BG130026 | AW622742 | CD971151 | CD983329 |
| DR339030 | DR197070 | BG130026 | AW648800 | CD971151 | CD983331 |
| DR339030 | DR197071 | BG130101 | BG128938 | CD971151 | CD983335 |
| DR339039 | DR197069 | BG130101 | BG129751 | CD971151 | CD983361 |
| DR339039 | DR197070 | BG130101 | BG644138 | CD971151 | CD983375 |
| DR339054 | DR197056 | BG130114 | BI934566 | CD971151 | CD983388 |
| DR339054 | DR197069 | BG130141 | BE451587 | CD971151 | CD983420 |
| DR339054 | DR197070 | BG130146 | BG124712 | CD971151 | CD988134 |
| DR339054 | DR197071 | BG130224 | AW218056 | CD971151 | CF058610 |
| DR339058 | DR197056 | BG130224 | BG123213 | CD971232 | CF029966 |
| DR339058 | DR197069 | BG130294 | AI489351 | CD971236 | CF029756 |
| DR339058 | DR197070 | BG130376 | AW032972 | CD971236 | CF029966 |
| DR339058 | DR197071 | BG130385 | AW624034 | CD971237 | CF029966 |
| DR339059 | DR197056 | BG130385 | BG125075 | CD971298 | CF059131 |
| DR339059 | DR197069 | BG130385 | BG127717 | CD971410 | CF059131 |
| DR339059 | DR197070 | BG130385 | BG129838 | CD971429 | CF040860 |
| DR339059 | DR197071 | BG130385 | BG129918 | CD971504 | CD997865 |
| DR339126 | DR197056 | BG130385 | BI926255 | CD971504 | CD999214 |
| DR339127 | DR197056 | BG130385 | BI927138 | CD971504 | CF038366 |
| DR339127 | DR197069 | BG130540 | BG130575 | CD971517 | CF040860 |
| DR339127 | DR197070 | BG130567 | AW929621 | CD971533 | CD971806 |
| DR340227 | DR358413 | BG130568 | AI771242 | CD971533 | CD972206 |
| DR340227 | DR358414 | BG130670 | AW034832 | CD971533 | CD972515 |
| DR340227 | DR358415 | BG130676 | BG642983 | CD971533 | CD972661 |
| DR340228 | DR358413 | BG130679 | AW933691 | CD971533 | CD973157 |
| DR340228 | DR358414 | BG130691 | BI423355 | CD971533 | CD973448 |
| DR340230 | DR358413 | BG130691 | BI932634 | CD971533 | CD973635 |
| DR340230 | DR358414 | BG130778 | AI489351 | CD971533 | CD973765 |
| DR340235 | DR358413 | BG130804 | AI897028 | CD971533 | CD974225 |
| DR340235 | DR358414 | BG130809 | BG131868 | CD971533 | CD974475 |
| DR342174 | DR369013 | BG130874 | BG713789 | CD971533 | CD975374 |
| DR343532 | DR353123 | BG130876 | AW737933 | CD971533 | CD976274 |
| DR343532 | DR353124 | BG130934 | AW735906 | CD971533 | CD977600 |
| DR343540 | DR353123 | BG130963 | AI771242 | CD971533 | CD977966 |
| DR343540 | DR353124 | BG131008 | AW934308 | CD971533 | CD978828 |
| DR348976 | DR233728 | BG131008 | BE458546 | CD971533 | CD985646 |
| DR348976 | DR233729 | BG131022 | BG135253 | CD971533 | CF043668 |

|          |          |          |          |          |          |
|----------|----------|----------|----------|----------|----------|
| DR348976 | DR233730 | BG131046 | AW216909 | CD971533 | CF060108 |
| DR348977 | DR233728 | BG131046 | BG643045 | CD971533 | CF060299 |
| DR348977 | DR233729 | BG131047 | AW622246 | CD971534 | CD973436 |
| DR348977 | DR233730 | BG131063 | BI931709 | CD971575 | CD971806 |
| DR348980 | DR233728 | BG131093 | AW735906 | CD971575 | CD972206 |
| DR349208 | DR248978 | BG131098 | AW932475 | CD971575 | CD972515 |
| DR349208 | DR249001 | BG131169 | AI489351 | CD971575 | CD972661 |
| DR349208 | DR249004 | BG131189 | AW030367 | CD971575 | CD973157 |
| DR349208 | DR249014 | BG131263 | BG129634 | CD971575 | CD973448 |
| DR349208 | DR349244 | BG131263 | BG642629 | CD971575 | CD973635 |
| DR349208 | DR349245 | BG131366 | BG129184 | CD971575 | CD973765 |
| DR349208 | DR349276 | BG131404 | AW220647 | CD971575 | CD974225 |
| DR349208 | DR349295 | BG131404 | BE458357 | CD971575 | CD974475 |
| DR349208 | DR349311 | BG131404 | BG125406 | CD971575 | CD975374 |
| DR349209 | DR349226 | BG131423 | BI423355 | CD971575 | CD976274 |
| DR349209 | DR349301 | BG131429 | BI924623 | CD971575 | CD977600 |
| DR349218 | DR248990 | BG131506 | AI486854 | CD971575 | CD977966 |
| DR349223 | DR248990 | BG131506 | AI487123 | CD971575 | CD978828 |
| DR350864 | DR366874 | BG131506 | AI897379 | CD971575 | CD985646 |
| DR350864 | DR366876 | BG131506 | AI897932 | CD971575 | CF043668 |
| DR350864 | DR366878 | BG131513 | AW036020 | CD971575 | CF060108 |
| DR350864 | DR366879 | BG131618 | AW030141 | CD971575 | CF060299 |
| DR350864 | DR366880 | BG131622 | AI486872 | CD971637 | CD972686 |
| DR350864 | DR366881 | BG131699 | BF051615 | CD971637 | CD973358 |
| DR352773 | DR383317 | BG131699 | BG128326 | CD971637 | CD973436 |
| DR353025 | DR237093 | BG131699 | BG129219 | CD971637 | CD973631 |
| DR353025 | DR353924 | BG131699 | BI928074 | CD971801 | CD976022 |
| DR353025 | DR353928 | BG131699 | BI928267 | CD971801 | CD976051 |
| DR353025 | DR353929 | BG131699 | BI929692 | CD971801 | CD976517 |
| DR353025 | DR353930 | BG131803 | AW035228 | CD971801 | CD976582 |
| DR353025 | DR353932 | BG131808 | BG131676 | CD971801 | CD977899 |
| DR353025 | DR353933 | BG132040 | AW737093 | CD971801 | CD978553 |
| DR353025 | DR353935 | BG132064 | AI489351 | CD971801 | CD978780 |
| DR353025 | DR353936 | BG132120 | AI894968 | CD971801 | CD979235 |
| DR353025 | DR353937 | BG132120 | AW032173 | CD971801 | CD979810 |
| DR353025 | DR353939 | BG132158 | AW035609 | CD971801 | CD979811 |
| DR353025 | DR353940 | BG132167 | AW929923 | CD971801 | CD979812 |
| DR353025 | DR353941 | BG132167 | AW930794 | CD971801 | CD981395 |
| DR353025 | DR353943 | BG132167 | BG127124 | CD971801 | CD981604 |
| DR353025 | DR353944 | BG132167 | BI928414 | CD971801 | CD981606 |
| DR353025 | DR353947 | BG132190 | AW030367 | CD971801 | CD981639 |
| DR353025 | DR353949 | BG132237 | AW622742 | CD971801 | CD981790 |
| DR353025 | DR353952 | BG132237 | AW648800 | CD971801 | CD981810 |
| DR353025 | DR353953 | BG132381 | AW030427 | CD971801 | CD981909 |
| DR353025 | DR353955 | BG132381 | AW931677 | CD971801 | CD982058 |
| DR353025 | DR353956 | BG132381 | AW933734 | CD971801 | CD982356 |
| DR353025 | DR353957 | BG132381 | BE353820 | CD971801 | CD982510 |
| DR353025 | DR353958 | BG132381 | BG133527 | CD971801 | CD982548 |
| DR353025 | DR353960 | BG132381 | BG643491 | CD971801 | CD982616 |
| DR353025 | DR353962 | BG132381 | BI422807 | CD971801 | CD982647 |
| DR353025 | DR353963 | BG132381 | BI928076 | CD971801 | CD982704 |
| DR353025 | DR353965 | BG132381 | BI931479 | CD971801 | CD982785 |

|          |          |          |          |          |          |
|----------|----------|----------|----------|----------|----------|
| DR353025 | DR353967 | BG132381 | BI933502 | CD971801 | CD982819 |
| DR353025 | DR353968 | BG132400 | AI896694 | CD971801 | CD982913 |
| DR353025 | DR353969 | BG132411 | AW624058 | CD971801 | CD982918 |
| DR353025 | DR353974 | BG132461 | AW928368 | CD971801 | CD982954 |
| DR353025 | DR353977 | BG132461 | BG129634 | CD971801 | CD982971 |
| DR353025 | DR353978 | BG132461 | BG642629 | CD971801 | CD982983 |
| DR353025 | DR353980 | BG132476 | BE353419 | CD971801 | CD982984 |
| DR353025 | DR353982 | BG132476 | BE353579 | CD971801 | CD983057 |
| DR353025 | DR353984 | BG132501 | AI489351 | CD971801 | CD983061 |
| DR353025 | DR353985 | BG132532 | BG124287 | CD971801 | CD983133 |
| DR353025 | DR353986 | BG132737 | BI932127 | CD971801 | CD983143 |
| DR353025 | DR353987 | BG132763 | BI923935 | CD971801 | CD983212 |
| DR353025 | DR353990 | BG132819 | AW932475 | CD971801 | CD983253 |
| DR353025 | DR353991 | BG132863 | AW735906 | CD971801 | CD983259 |
| DR353025 | DR353992 | BG132944 | AW030444 | CD971801 | CD983264 |
| DR353025 | DR353994 | BG132966 | AW932475 | CD971801 | CD983297 |
| DR353025 | DR353995 | BG132982 | AW220144 | CD971801 | CD983420 |
| DR353025 | DR353998 | BG132982 | AW621424 | CD971801 | CD983450 |
| DR353025 | DR354010 | BG132982 | BG130693 | CD971801 | CD983472 |
| DR353025 | DR366647 | BG132982 | BG130802 | CD971985 | CD986633 |
| DR353025 | DR368347 | BG132982 | BG134371 | CD972036 | CD976021 |
| DR353025 | DR368348 | BG133134 | AW622742 | CD972036 | CD976582 |
| DR353025 | DR368349 | BG133134 | AW648800 | CD972036 | CD976734 |
| DR353025 | DR368351 | BG133176 | AW220444 | CD972036 | CD979812 |
| DR353025 | DR368352 | BG133178 | AW218629 | CD972036 | CD981604 |
| DR353025 | DR368353 | BG133306 | AI894862 | CD972036 | CD981605 |
| DR353025 | DR368354 | BG133306 | AI896583 | CD972036 | CD981606 |
| DR353025 | DR368361 | BG133306 | BI921845 | CD972036 | CD981607 |
| DR353025 | DR368362 | BG133315 | AW932475 | CD972036 | CD981639 |
| DR353025 | DR368364 | BG133346 | AW735873 | CD972036 | CD981790 |
| DR353025 | DR368369 | BG133346 | BI925210 | CD972036 | CD981810 |
| DR353025 | DR368371 | BG133455 | AI483439 | CD972036 | CD981912 |
| DR353025 | DR368372 | BG133504 | AI489351 | CD972036 | CD981991 |
| DR353025 | DR368373 | BG133543 | AW217236 | CD972036 | CD981992 |
| DR353110 | DR354188 | BG133583 | AI489351 | CD972036 | CD982026 |
| DR353131 | DR355279 | BG133642 | BI928256 | CD972036 | CD982027 |
| DR353172 | DR369768 | BG133769 | AW737933 | CD972036 | CD982219 |
| DR353174 | DR369768 | BG133968 | AW622742 | CD972036 | CD982499 |
| DR353175 | DR369768 | BG133968 | AW648800 | CD972036 | CD982548 |
| DR353197 | DR250835 | BG134005 | AI485051 | CD972036 | CD982636 |
| DR353207 | DR363057 | BG134005 | AI489351 | CD972036 | CD982647 |
| DR353241 | DR232561 | BG134024 | AI490210 | CD972036 | CD982675 |
| DR353242 | DR232561 | BG134024 | AI898243 | CD972036 | CD982704 |
| DR353242 | DR232565 | BG134024 | AW033073 | CD972036 | CD982819 |
| DR353243 | DR232561 | BG134024 | BE458576 | CD972036 | CD982821 |
| DR353261 | DR243675 | BG134024 | BI423314 | CD972036 | CD982836 |
| DR353399 | DR369768 | BG134100 | AW218624 | CD972036 | CD982848 |
| DR354145 | DR257421 | BG134112 | BG135626 | CD972036 | CD982971 |
| DR354145 | DR257429 | BG134229 | AW030123 | CD972036 | CD983057 |
| DR354147 | DR257418 | BG134272 | AW032222 | CD972036 | CD983074 |
| DR354147 | DR257419 | BG134275 | AI486872 | CD972036 | CD983099 |
| DR354147 | DR257422 | BG134286 | AI483044 | CD972036 | CD983105 |

|          |          |          |          |          |          |
|----------|----------|----------|----------|----------|----------|
| DR354147 | DR257423 | BG134286 | AW623874 | CD972036 | CD983111 |
| DR354147 | DR257424 | BG134286 | BG132170 | CD972036 | CD983149 |
| DR354147 | DR257425 | BG134286 | BG643325 | CD972036 | CD983264 |
| DR354147 | DR257427 | BG134332 | AW735906 | CD972036 | CD983275 |
| DR354147 | DR272349 | BG134336 | AW033678 | CD972036 | CD983297 |
| DR354401 | DR368603 | BG134383 | AW932475 | CD972036 | CD983319 |
| DR354514 | DR336573 | BG134408 | BG131574 | CD972036 | CD983331 |
| DR354514 | DR336576 | BG134439 | AI489351 | CD972036 | CD983350 |
| DR354514 | DR336578 | BG134445 | BI932127 | CD972036 | CD983375 |
| DR354514 | DR336583 | BG134449 | BE462446 | CD972036 | CD983397 |
| DR354573 | DR310749 | BG134539 | BI921540 | CD972036 | CD983420 |
| DR354655 | DR202595 | BG134559 | BG135829 | CD972036 | CD988134 |
| DR354655 | DR202620 | BG134633 | AW218993 | CD972176 | CD971806 |
| DR354656 | DR202620 | BG134633 | AW928650 | CD972176 | CD972206 |
| DR354657 | DR202595 | BG134633 | BE459646 | CD972176 | CD972661 |
| DR354658 | DR202595 | BG134633 | BG130716 | CD972176 | CD973141 |
| DR354658 | DR202620 | BG134633 | BI927059 | CD972176 | CD973157 |
| DR354672 | DR202595 | BG134712 | BE463154 | CD972176 | CD973448 |
| DR354672 | DR202620 | BG134729 | AI489351 | CD972176 | CD973635 |
| DR354701 | DR202595 | BG134825 | AW623874 | CD972176 | CD973765 |
| DR354701 | DR202620 | BG134825 | BG135416 | CD972176 | CD974475 |
| DR354713 | DR202595 | BG134825 | BG643325 | CD972176 | CD975374 |
| DR354713 | DR202620 | BG134857 | AI490899 | CD972176 | CD976274 |
| DR354714 | DR202595 | BG134893 | AW624085 | CD972176 | CD978828 |
| DR354714 | DR202620 | BG134893 | AW930070 | CD972176 | CD985646 |
| DR354790 | DR300978 | BG134909 | BE458997 | CD972176 | CF043668 |
| DR354790 | DR300979 | BG134919 | AI485051 | CD972176 | CF060108 |
| DR354790 | DR300980 | BG134919 | AI489351 | CD972176 | CF060299 |
| DR354790 | DR300982 | BG134979 | BI932127 | CD972176 | CF060324 |
| DR354790 | DR300985 | BG135078 | AW033247 | CD972195 | CF039979 |
| DR354790 | DR300988 | BG135091 | BI932634 | CD972296 | CF032205 |
| DR354790 | DR300989 | BG135131 | AW030121 | CD972296 | CF048321 |
| DR354859 | DR325733 | BG135188 | AI486872 | CD972365 | CD971806 |
| DR354859 | DR325734 | BG135264 | BG135253 | CD972365 | CD972191 |
| DR354859 | DR325737 | BG135300 | AW032972 | CD972365 | CD972206 |
| DR354859 | DR325738 | BG135352 | BI928077 | CD972365 | CD972515 |
| DR354859 | DR325741 | BG135374 | BE354829 | CD972365 | CD972661 |
| DR354859 | DR325742 | BG135418 | AI489351 | CD972365 | CD973103 |
| DR354859 | DR325744 | BG135439 | AI489351 | CD972365 | CD973157 |
| DR354859 | DR325760 | BG135445 | BG135253 | CD972365 | CD973448 |
| DR354859 | DR325761 | BG135482 | AW219305 | CD972365 | CD973635 |
| DR354859 | DR325766 | BG135483 | BI930850 | CD972365 | CD973765 |
| DR354996 | DR354521 | BG135483 | BI931505 | CD972365 | CD974078 |
| DR355175 | DR368297 | BG135495 | AW928368 | CD972365 | CD974225 |
| DR355176 | DR368297 | BG135495 | BG642629 | CD972365 | CD974475 |
| DR355177 | DR368297 | BG135506 | BG135253 | CD972365 | CD975374 |
| DR355178 | DR368297 | BG135658 | AI489937 | CD972365 | CD976274 |
| DR356421 | DR355276 | BG135658 | AW032222 | CD972365 | CD977600 |
| DR356439 | DR369762 | BG135658 | AW738555 | CD972365 | CD977966 |
| DR356441 | DR369762 | BG135658 | BE450989 | CD972365 | CD978828 |
| DR356535 | DR363806 | BG135792 | AW030191 | CD972365 | CD985617 |
| DR356535 | DR363807 | BG135795 | AI486423 | CD972365 | CD985646 |

|          |          |          |          |          |          |
|----------|----------|----------|----------|----------|----------|
| DR356536 | DR363807 | BG135795 | AW216783 | CD972365 | CF043668 |
| DR356537 | DR363806 | BG135795 | AW651581 | CD972365 | CF060108 |
| DR356537 | DR363807 | BG135795 | AW933898 | CD972365 | CF060299 |
| DR357512 | DR262590 | BG135795 | BG129981 | CD972365 | CF060324 |
| DR358264 | DR235880 | BG135868 | BG643923 | CD972379 | CF039979 |
| DR358283 | DR263441 | BG135874 | BG129184 | CD972426 | CF055367 |
| DR358283 | DR348875 | BG135874 | BI423355 | CD972483 | CD976022 |
| DR358283 | DR348876 | BG135874 | BI924624 | CD972483 | CD976051 |
| DR358283 | DR348877 | BG135877 | AI486808 | CD972483 | CD976517 |
| DR358283 | DR348879 | BG642496 | AI898456 | CD972483 | CD976582 |
| DR358283 | DR348882 | BG642576 | BG129317 | CD972483 | CD977899 |
| DR358283 | DR348883 | BG642632 | BG129634 | CD972483 | CD978317 |
| DR358283 | DR348884 | BG642632 | BG642629 | CD972483 | CD978553 |
| DR358283 | DR348885 | BG642670 | BE441067 | CD972483 | CD978780 |
| DR358283 | DR348886 | BG642718 | BG135829 | CD972483 | CD979234 |
| DR358283 | DR348887 | BG642731 | AI482917 | CD972483 | CD979235 |
| DR358283 | DR348888 | BG642731 | AW220375 | CD972483 | CD979810 |
| DR358283 | DR348893 | BG642731 | BG128869 | CD972483 | CD979811 |
| DR358283 | DR348895 | BG642731 | BG134706 | CD972483 | CD979812 |
| DR358283 | DR348896 | BG642779 | AW928964 | CD972483 | CD981395 |
| DR358283 | DR348901 | BG642779 | BE353621 | CD972483 | CD981584 |
| DR358283 | DR348902 | BG642779 | BG134674 | CD972483 | CD981604 |
| DR358283 | DR348903 | BG642779 | BI927095 | CD972483 | CD981606 |
| DR358283 | DR348905 | BG642783 | BI924041 | CD972483 | CD981639 |
| DR358283 | DR348907 | BG642813 | BE449846 | CD972483 | CD981790 |
| DR358283 | DR348908 | BG642822 | BI921785 | CD972483 | CD981810 |
| DR358283 | DR348909 | BG642896 | BG125573 | CD972483 | CD981909 |
| DR358283 | DR348910 | BG642994 | AW647837 | CD972483 | CD981992 |
| DR358283 | DR348916 | BG642997 | AI482767 | CD972483 | CD982058 |
| DR358283 | DR348919 | BG642997 | AW217861 | CD972483 | CD982355 |
| DR358283 | DR348921 | BG642997 | AW624701 | CD972483 | CD982356 |
| DR358283 | DR348922 | BG642997 | BG123421 | CD972483 | CD982498 |
| DR358283 | DR348924 | BG642997 | BG123594 | CD972483 | CD982510 |
| DR358283 | DR348926 | BG642997 | BG123619 | CD972483 | CD982548 |
| DR358283 | DR348930 | BG642997 | BG123689 | CD972483 | CD982616 |
| DR358283 | DR348933 | BG642997 | BG124510 | CD972483 | CD982647 |
| DR358283 | DR348934 | BG642997 | BG125967 | CD972483 | CD982672 |
| DR358283 | DR348936 | BG642997 | BG126014 | CD972483 | CD982675 |
| DR358848 | DR269409 | BG642997 | BG126767 | CD972483 | CD982704 |
| DR358848 | DR269411 | BG642997 | BG127086 | CD972483 | CD982785 |
| DR358849 | DR269409 | BG642997 | BG127548 | CD972483 | CD982796 |
| DR358849 | DR269411 | BG642997 | BG127610 | CD972483 | CD982819 |
| DR359126 | DR255296 | BG642997 | BG128196 | CD972483 | CD982821 |
| DR359126 | DR255297 | BG642997 | BG128487 | CD972483 | CD982825 |
| DR359126 | DR255299 | BG642997 | BG128966 | CD972483 | CD982833 |
| DR359126 | DR255302 | BG642997 | BG129159 | CD972483 | CD982848 |
| DR359126 | DR255303 | BG642997 | BG643787 | CD972483 | CD982913 |
| DR359126 | DR255305 | BG642997 | BG643960 | CD972483 | CD982918 |
| DR359126 | DR255306 | BG642997 | BG644068 | CD972483 | CD982954 |
| DR359574 | DR364551 | BG642997 | BI926797 | CD972483 | CD982971 |
| DR360768 | DR226072 | BG642997 | BI929916 | CD972483 | CD982983 |
| DR360768 | DR242767 | BG642997 | BI929960 | CD972483 | CD982984 |



|          |          |          |          |          |          |
|----------|----------|----------|----------|----------|----------|
| DR360768 | DR260669 | BG642997 | BI933214 | CD972483 | CD983009 |
| DR360768 | DR260673 | BG643146 | BG125658 | CD972483 | CD983021 |
| DR360769 | DR226071 | BG643146 | BG125802 | CD972483 | CD983057 |
| DR360769 | DR242755 | BG643146 | BG791261 | CD972483 | CD983061 |
| DR360769 | DR242767 | BG643177 | BI926428 | CD972483 | CD983074 |
| DR360769 | DR242768 | BG643245 | AI489351 | CD972483 | CD983099 |
| DR360769 | DR260669 | BG643283 | BG129011 | CD972483 | CD983101 |
| DR360769 | DR260673 | BG643285 | BG125436 | CD972483 | CD983105 |
| DR360771 | DR226072 | BG643290 | BI932764 | CD972483 | CD983133 |
| DR360771 | DR242755 | BG643316 | AW944911 | CD972483 | CD983143 |
| DR360771 | DR242763 | BG643321 | AW931832 | CD972483 | CD983212 |
| DR360771 | DR242767 | BG643352 | AW218355 | CD972483 | CD983253 |
| DR360771 | DR242768 | BG643352 | AW622023 | CD972483 | CD983259 |
| DR360771 | DR260669 | BG643394 | AI489351 | CD972483 | CD983264 |
| DR360771 | DR260673 | BG643452 | AW933486 | CD972483 | CD983297 |
| DR360774 | DR226071 | BG643477 | AW929564 | CD972483 | CD983329 |
| DR360774 | DR242755 | BG643561 | AI487087 | CD972483 | CD983331 |
| DR360774 | DR242763 | BG643561 | AW036659 | CD972483 | CD983375 |
| DR360774 | DR242767 | BG643561 | BE462171 | CD972483 | CD983388 |
| DR360774 | DR242768 | BG643561 | BI923765 | CD972483 | CD983420 |
| DR360774 | DR260673 | BG643578 | AW034894 | CD972483 | CD983450 |
| DR360778 | DR226071 | BG643587 | AW429218 | CD972483 | CD983472 |
| DR360778 | DR226072 | BG643587 | AW944753 | CD972483 | CD988134 |
| DR360778 | DR242755 | BG643587 | BE463313 | CD972483 | CF058610 |
| DR360778 | DR242767 | BG643587 | BG123898 | CD972609 | CD970035 |
| DR360778 | DR242768 | BG643587 | BG126599 | CD972742 | CD989398 |
| DR360778 | DR260669 | BG643587 | BG126710 | CD972812 | CD975696 |
| DR360778 | DR260673 | BG643587 | BG126864 | CD972899 | CD969527 |
| DR360779 | DR226071 | BG643587 | BG127034 | CD972899 | CD969719 |
| DR360779 | DR242755 | BG643587 | BG127684 | CD972899 | CF033631 |
| DR360779 | DR242767 | BG643587 | BG128059 | CD972899 | CF033821 |
| DR360779 | DR242768 | BG643587 | BG128060 | CD972899 | CF037427 |
| DR360779 | DR260669 | BG643587 | BG129337 | CD972924 | CD986633 |
| DR360779 | DR260673 | BG643587 | BG130466 | CD972942 | CD977623 |
| DR360780 | DR226071 | BG643587 | BG135671 | CD973120 | CD972629 |
| DR360780 | DR226072 | BG643587 | BI924456 | CD973120 | CD973607 |
| DR360780 | DR242755 | BG643587 | BI930064 | CD973120 | CD974429 |
| DR360780 | DR242757 | BG643587 | BI931716 | CD973120 | CD974729 |
| DR360780 | DR242767 | BG643614 | AI489351 | CD973120 | CD974788 |
| DR360780 | DR242768 | BG643660 | AI489351 | CD973120 | CD974905 |
| DR360780 | DR260669 | BG643673 | AI482969 | CD973120 | CD975126 |
| DR360780 | DR260673 | BG643732 | AW035342 | CD973120 | CF039413 |
| DR360784 | DR226071 | BG643732 | BI423139 | CD973120 | CF040700 |
| DR360784 | DR242755 | BG643791 | BF051615 | CD973120 | CF042035 |
| DR360784 | DR242763 | BG643791 | BI928267 | CD973120 | CF047765 |
| DR360784 | DR242767 | BG643791 | BI929692 | CD973120 | CF049536 |
| DR360784 | DR242768 | BG643877 | BG129317 | CD973120 | CF051805 |
| DR360784 | DR260669 | BG643899 | AI485051 | CD973120 | CF053128 |
| DR360784 | DR260673 | BG643899 | AI489351 | CD973120 | CF054039 |
| DR360786 | DR226071 | BG643957 | AW218549 | CD973120 | CF057123 |
| DR360786 | DR226072 | BG643957 | BG134131 | CD973120 | CF058049 |
| DR360786 | DR242755 | BG643957 | BI924702 | CD973159 | CD972364 |

|          |          |          |          |          |          |
|----------|----------|----------|----------|----------|----------|
| DR360786 | DR242767 | BG644006 | AW623185 | CD973159 | CD973020 |
| DR360786 | DR242768 | BG644007 | AW932562 | CD973194 | CD975290 |
| DR360786 | DR260669 | BG644016 | BI924534 | CD973468 | CD970035 |
| DR360786 | DR260673 | BG644025 | AW738359 | CD973489 | CD971806 |
| DR360787 | DR226072 | BG644054 | BI421874 | CD973489 | CD972191 |
| DR360787 | DR242755 | BG644061 | BI928753 | CD973489 | CD972206 |
| DR360787 | DR242767 | BG644095 | BI927637 | CD973489 | CD972515 |
| DR360787 | DR242768 | BG713799 | BG713772 | CD973489 | CD972661 |
| DR360787 | DR260669 | BG713803 | AW036711 | CD973489 | CD973103 |
| DR360787 | DR260673 | BG713803 | AW220030 | CD973489 | CD973157 |
| DR360788 | DR226071 | BG713803 | AW622214 | CD973489 | CD973448 |
| DR360788 | DR226072 | BG713803 | AW932357 | CD973489 | CD973635 |
| DR360788 | DR242755 | BG713825 | BG713830 | CD973489 | CD973765 |
| DR360788 | DR242767 | BG791240 | BG791238 | CD973489 | CD974078 |
| DR360788 | DR242768 | BG791282 | AW738668 | CD973489 | CD974225 |
| DR360788 | DR260669 | BG791294 | AW944911 | CD973489 | CD974475 |
| DR360788 | DR260673 | BI421127 | AW033678 | CD973489 | CD975374 |
| DR360793 | DR226071 | BI421127 | AW033793 | CD973489 | CD976274 |
| DR360793 | DR226072 | BI421136 | AW030367 | CD973489 | CD977600 |
| DR360793 | DR242755 | BI421136 | AW033678 | CD973489 | CD977966 |
| DR360793 | DR242763 | BI421136 | AW033793 | CD973489 | CD978828 |
| DR360793 | DR242767 | BI421150 | AI485525 | CD973489 | CD985617 |
| DR360793 | DR242768 | BI421150 | AI776982 | CD973489 | CD985646 |
| DR360793 | DR260669 | BI421150 | AI894603 | CD973489 | CF043668 |
| DR360793 | DR260673 | BI421150 | AI894703 | CD973489 | CF060108 |
| DR360813 | DR356212 | BI421150 | AI894757 | CD973489 | CF060299 |
| DR361639 | DR359297 | BI421150 | AI894781 | CD973489 | CF060324 |
| DR361640 | DR359296 | BI421150 | AI894878 | CD973568 | CD971806 |
| DR361641 | DR359296 | BI421150 | AI894890 | CD973568 | CD972191 |
| DR361641 | DR359297 | BI421150 | AI894921 | CD973568 | CD972206 |
| DR361641 | DR359299 | BI421150 | AI895021 | CD973568 | CD972515 |
| DR361648 | DR359296 | BI421150 | AI895109 | CD973568 | CD972661 |
| DR361648 | DR359297 | BI421150 | AI895491 | CD973568 | CD973157 |
| DR361649 | DR359296 | BI421150 | AI895666 | CD973568 | CD973448 |
| DR361649 | DR359299 | BI421150 | AI895773 | CD973568 | CD974225 |
| DR361651 | DR359296 | BI421150 | AI895903 | CD973568 | CD974475 |
| DR361651 | DR359297 | BI421150 | AI895914 | CD973568 | CD976274 |
| DR361651 | DR359299 | BI421150 | AI895958 | CD973568 | CD977600 |
| DR361652 | DR359296 | BI421150 | AI895995 | CD973568 | CD978828 |
| DR361652 | DR359297 | BI421150 | AI896001 | CD973568 | CF043668 |
| DR362379 | DR229192 | BI421150 | AI896239 | CD973568 | CF060108 |
| DR362558 | DR226052 | BI421150 | AI896406 | CD973568 | CF060299 |
| DR362562 | DR226052 | BI421150 | AI896725 | CD973568 | CF060324 |
| DR363183 | DR261275 | BI421150 | AW029658 | CD973569 | CD970337 |
| DR363183 | DR261276 | BI421150 | AW029683 | CD973569 | CD971036 |
| DR363183 | DR261277 | BI421150 | AW029885 | CD973569 | CD985462 |
| DR363266 | DR353601 | BI421150 | AW030059 | CD973577 | CF035046 |
| DR363266 | DR353606 | BI421150 | AW030168 | CD973577 | CF037312 |
| DR363266 | DR353607 | BI421150 | AW030403 | CD973577 | CF037489 |
| DR363266 | DR353610 | BI421150 | AW030690 | CD973577 | CF037833 |
| DR363266 | DR353611 | BI421150 | AW030711 | CD973577 | CF040263 |
| DR363266 | DR353618 | BI421150 | AW030801 | CD973579 | CF039117 |

|          |          |          |          |          |          |
|----------|----------|----------|----------|----------|----------|
| DR363266 | DR353620 | BI421150 | AW030857 | CD973580 | CD980402 |
| DR363266 | DR353621 | BI421150 | AW030861 | CD973580 | CD980414 |
| DR363266 | DR353625 | BI421150 | AW030951 | CD973636 | CD986633 |
| DR363266 | DR353627 | BI421150 | AW031043 | CD973653 | CD989442 |
| DR363266 | DR353631 | BI421150 | AW031048 | CD973705 | CD972257 |
| DR363266 | DR353635 | BI421150 | AW031066 | CD973705 | CD972880 |
| DR363266 | DR353636 | BI421150 | AW031074 | CD973770 | CD987083 |
| DR363266 | DR353637 | BI421150 | AW031314 | CD973787 | CD978185 |
| DR363266 | DR353638 | BI421150 | AW031332 | CD973787 | CD978641 |
| DR363266 | DR353639 | BI421150 | AW031838 | CD973846 | CD974943 |
| DR363266 | DR353644 | BI421150 | AW031851 | CD973846 | CD975125 |
| DR363266 | DR353645 | BI421150 | AW032570 | CD973846 | CD975243 |
| DR363266 | DR353649 | BI421150 | AW032589 | CD973846 | CD982592 |
| DR363266 | DR353650 | BI421150 | AW032659 | CD973862 | CD975109 |
| DR363266 | DR353653 | BI421150 | AW032680 | CD973873 | CD972364 |
| DR363266 | DR353657 | BI421150 | AW032833 | CD973973 | CD973304 |
| DR363266 | DR353661 | BI421150 | AW032948 | CD973973 | CD975008 |
| DR363266 | DR353664 | BI421150 | AW033025 | CD973984 | CD972515 |
| DR363272 | DR271367 | BI421150 | AW033068 | CD973984 | CD973157 |
| DR363272 | DR271368 | BI421150 | AW033183 | CD973984 | CD973448 |
| DR363272 | DR271369 | BI421150 | AW033241 | CD973984 | CD976274 |
| DR363272 | DR271370 | BI421150 | AW033337 | CD973984 | CD977966 |
| DR363272 | DR271373 | BI421150 | AW033486 | CD973984 | CD978828 |
| DR363272 | DR271375 | BI421150 | AW033575 | CD973984 | CF043668 |
| DR363527 | DR363102 | BI421150 | AW033770 | CD973984 | CF060108 |
| DR363646 | DR253128 | BI421150 | AW033964 | CD974184 | CF039117 |
| DR363742 | DR354921 | BI421150 | AW034014 | CD974204 | CD972134 |
| DR363848 | DR272320 | BI421150 | AW034141 | CD974204 | CD973100 |
| DR363848 | DR283832 | BI421150 | AW034146 | CD974204 | CD979750 |
| DR363848 | DR283835 | BI421150 | AW034153 | CD974204 | CD980633 |
| DR363852 | DR354396 | BI421150 | AW034252 | CD974204 | CD981399 |
| DR363852 | DR354397 | BI421150 | AW034375 | CD974228 | CF048716 |
| DR363852 | DR369754 | BI421150 | AW034424 | CD974243 | CD989889 |
| DR363864 | DR256996 | BI421150 | AW034801 | CD974243 | CF039149 |
| DR363864 | DR257054 | BI421150 | AW034896 | CD974273 | CD972364 |
| DR363884 | DR220729 | BI421150 | AW035169 | CD974273 | CD973020 |
| DR363884 | DR220730 | BI421150 | AW035438 | CD974294 | CF050499 |
| DR363884 | DR220735 | BI421150 | AW035452 | CD974318 | CD972629 |
| DR363884 | DR220738 | BI421150 | AW035564 | CD974318 | CD974788 |
| DR363884 | DR220739 | BI421150 | AW035592 | CD974318 | CF042035 |
| DR363884 | DR220741 | BI421150 | AW035779 | CD974318 | CF042456 |
| DR363909 | DR354352 | BI421150 | AW035809 | CD974318 | CF047765 |
| DR363983 | DR358925 | BI421150 | AW216376 | CD974318 | CF049536 |
| DR363983 | DR358926 | BI421150 | AW216379 | CD974318 | CF051805 |
| DR364051 | DR351017 | BI421150 | AW216441 | CD974318 | CF054039 |
| DR364051 | DR351024 | BI421150 | AW216585 | CD974346 | CD971839 |
| DR364051 | DR351027 | BI421150 | AW216840 | CD974346 | CD971893 |
| DR364051 | DR351029 | BI421150 | AW216861 | CD974346 | CD972687 |
| DR364051 | DR351034 | BI421150 | AW217168 | CD974346 | CD974891 |
| DR364051 | DR351066 | BI421150 | AW217190 | CD974346 | CD975738 |
| DR364051 | DR351068 | BI421150 | AW217259 | CD974346 | CD975744 |
| DR364051 | DR351070 | BI421150 | AW219143 | CD974346 | CD997496 |

|          |          |          |          |          |          |
|----------|----------|----------|----------|----------|----------|
| DR364051 | DR351073 | BI421150 | AW625523 | CD974374 | CD971806 |
| DR364051 | DR351074 | BI421150 | AW647633 | CD974374 | CD972206 |
| DR364051 | DR351077 | BI421150 | AW648493 | CD974374 | CD972515 |
| DR364051 | DR351078 | BI421150 | AW979544 | CD974374 | CD973448 |
| DR364051 | DR351091 | BI421150 | AW979879 | CD974374 | CD973765 |
| DR364051 | DR351092 | BI421150 | BG131235 | CD974374 | CD977600 |
| DR364051 | DR351096 | BI421150 | BG132190 | CD974374 | CD978828 |
| DR364109 | DR364021 | BI421150 | BG133719 | CD974374 | CF043668 |
| DR364110 | DR364021 | BI421150 | BG133904 | CD974374 | CF060108 |
| DR364117 | DR354352 | BI421150 | BI421136 | CD974374 | CF060299 |
| DR364131 | DR188336 | BI421150 | BI421190 | CD974444 | CD989398 |
| DR364131 | DR188339 | BI421150 | BI421211 | CD974459 | CF051878 |
| DR364131 | DR190377 | BI421150 | BI421259 | CD974491 | CD975255 |
| DR364131 | DR190491 | BI421150 | BI421355 | CD974548 | CF042505 |
| DR364131 | DR190559 | BI421150 | BI421385 | CD974733 | CD972364 |
| DR364131 | DR190566 | BI421150 | BI421527 | CD974752 | CF039117 |
| DR364131 | DR190628 | BI421150 | BI421647 | CD974789 | CF039117 |
| DR364131 | DR190887 | BI421150 | BI421719 | CD974842 | CD971950 |
| DR364131 | DR230834 | BI421150 | BI421802 | CD974842 | CD971978 |
| DR364148 | DR361090 | BI421150 | BI421821 | CD974842 | CD973790 |
| DR364148 | DR361091 | BI421150 | BI421876 | CD974842 | CD975216 |
| DR364148 | DR361092 | BI421150 | BI421971 | CD974842 | CD975697 |
| DR364164 | DR291496 | BI421150 | BI422216 | CD974855 | CD976069 |
| DR364168 | DR273297 | BI421150 | BI422242 | CD974860 | CD971669 |
| DR364168 | DR273299 | BI421150 | BI422251 | CD974860 | CD971872 |
| DR364168 | DR273300 | BI421150 | BI422481 | CD974860 | CD974198 |
| DR364168 | DR273303 | BI421150 | BI422591 | CD974860 | CD974608 |
| DR364168 | DR273305 | BI421150 | BI422645 | CD974860 | CD997902 |
| DR364168 | DR273307 | BI421150 | BI422655 | CD974860 | CF038133 |
| DR364168 | DR273308 | BI421150 | BI422660 | CD974860 | CF039332 |
| DR364168 | DR273309 | BI421150 | BI422706 | CD974860 | CF039402 |
| DR364168 | DR273312 | BI421150 | BI423034 | CD974860 | CF040210 |
| DR364168 | DR273313 | BI421150 | BI423161 | CD974860 | CF044825 |
| DR364168 | DR273314 | BI421150 | BI423223 | CD974860 | CF044832 |
| DR364168 | DR273316 | BI421150 | BI921102 | CD974860 | CF052000 |
| DR364168 | DR334335 | BI421150 | BI921108 | CD974860 | CF052085 |
| DR364168 | DR334338 | BI421150 | BI921211 | CD974860 | CF053156 |
| DR364168 | DR334340 | BI421150 | BI921220 | CD974860 | CF053415 |
| DR364168 | DR334342 | BI421150 | BI921227 | CD974900 | CD986633 |
| DR364168 | DR334343 | BI421150 | BI921359 | CD974902 | CD973324 |
| DR364168 | DR334344 | BI421150 | BI921574 | CD974923 | CD972364 |
| DR364168 | DR334346 | BI421150 | BI921714 | CD974923 | CD973020 |
| DR364168 | DR334349 | BI421150 | BI921908 | CD974964 | CF032939 |
| DR364168 | DR334353 | BI421150 | BI921963 | CD974964 | CF033009 |
| DR364195 | DR267370 | BI421150 | BI921984 | CD974964 | CF033801 |
| DR364201 | DR349807 | BI421150 | BI922024 | CD974964 | CF059510 |
| DR364299 | DR299258 | BI421150 | BI922027 | CD975020 | CF032939 |
| DR364299 | DR299259 | BI421150 | BI922055 | CD975020 | CF033009 |
| DR364299 | DR299260 | BI421150 | BI922246 | CD975020 | CF033801 |
| DR364299 | DR299261 | BI421150 | BI922299 | CD975064 | CF039117 |
| DR364299 | DR299268 | BI421150 | BI922723 | CD975070 | CD974788 |
| DR364514 | DR262292 | BI421150 | BI922728 | CD975070 | CF042035 |

|          |          |          |          |          |          |
|----------|----------|----------|----------|----------|----------|
| DR364514 | DR262294 | BI421150 | BI922908 | CD975070 | CF042456 |
| DR364514 | DR262295 | BI421150 | BI922926 | CD975070 | CF047765 |
| DR364515 | DR262291 | BI421150 | BI922982 | CD975070 | CF049536 |
| DR364515 | DR262292 | BI421150 | BI923092 | CD975070 | CF054039 |
| DR364515 | DR262293 | BI421150 | BI923238 | CD975123 | CD972780 |
| DR364515 | DR262295 | BI421150 | BI923466 | CD975127 | CD975310 |
| DR364516 | DR262291 | BI421167 | AW030121 | CD975127 | CD975459 |
| DR364516 | DR262292 | BI421171 | AI898438 | CD975127 | CD975781 |
| DR364516 | DR262293 | BI421181 | AW030133 | CD975180 | CF039117 |
| DR364516 | DR262295 | BI421193 | AW030367 | CD975186 | CD974874 |
| DR364936 | DR276427 | BI421207 | AW033678 | CD975186 | CF037018 |
| DR364936 | DR276429 | BI421217 | AW030367 | CD975186 | CF044216 |
| DR364937 | DR276427 | BI421256 | AW033793 | CD975214 | CD974246 |
| DR364937 | DR276428 | BI421306 | BI421720 | CD975214 | CD975317 |
| DR364937 | DR276429 | BI421307 | BE450744 | CD975221 | CD973963 |
| DR365628 | DR276193 | BI421355 | AW030367 | CD975226 | CD971806 |
| DR365630 | DR276191 | BI421381 | AW033678 | CD975226 | CD972206 |
| DR365630 | DR276193 | BI421395 | AW622332 | CD975226 | CD972515 |
| DR365761 | DR233675 | BI421432 | AW621199 | CD975226 | CD972661 |
| DR365762 | DR233675 | BI421452 | AW030367 | CD975226 | CD973103 |
| DR365763 | DR233675 | BI421452 | AW033678 | CD975226 | CD973157 |
| DR366932 | DR240126 | BI421452 | AW033793 | CD975226 | CD973448 |
| DR366932 | DR349200 | BI421475 | AW030133 | CD975226 | CD973635 |
| DR366933 | DR240126 | BI421476 | AW030367 | CD975226 | CD973765 |
| DR366933 | DR349200 | BI421476 | AW033678 | CD975226 | CD974078 |
| DR366934 | DR240126 | BI421476 | AW033793 | CD975226 | CD974225 |
| DR366934 | DR349200 | BI421505 | AW033678 | CD975226 | CD974475 |
| DR366935 | DR240126 | BI421505 | AW033793 | CD975226 | CD975374 |
| DR366935 | DR349200 | BI421514 | AI894423 | CD975226 | CD976274 |
| DR366936 | DR240126 | BI421514 | AW031013 | CD975226 | CD977600 |
| DR366936 | DR349200 | BI421527 | AW030367 | CD975226 | CD977966 |
| DR366937 | DR240126 | BI421527 | AW033793 | CD975226 | CD978828 |
| DR366937 | DR349200 | BI421529 | AW455256 | CD975226 | CD985617 |
| DR366938 | DR240126 | BI421597 | AI771695 | CD975226 | CD985646 |
| DR366938 | DR349200 | BI421597 | AI899310 | CD975226 | CF043668 |
| DR366939 | DR240126 | BI421647 | AW030367 | CD975226 | CF060108 |
| DR366940 | DR240126 | BI421647 | AW033678 | CD975226 | CF060299 |
| DR366940 | DR349200 | BI421647 | AW033793 | CD975226 | CF060324 |
| DR366941 | DR240126 | BI421655 | AI895945 | CD975274 | CD971872 |
| DR366941 | DR349200 | BI421655 | BI423433 | CD975274 | CD974198 |
| DR366942 | DR240126 | BI421659 | AW932475 | CD975274 | CD975024 |
| DR366942 | DR349200 | BI421688 | AI486854 | CD975274 | CF038109 |
| DR366943 | DR240126 | BI421688 | AI487123 | CD975274 | CF038133 |
| DR366943 | DR349200 | BI421688 | AI897184 | CD975274 | CF039086 |
| DR366944 | DR240126 | BI421688 | AI897379 | CD975274 | CF039332 |
| DR366944 | DR349200 | BI421688 | AI897854 | CD975274 | CF039402 |
| DR366945 | DR240126 | BI421688 | AI897932 | CD975274 | CF043997 |
| DR366945 | DR349200 | BI421688 | AI899010 | CD975274 | CF044832 |
| DR366946 | DR240126 | BI421688 | AI899310 | CD975274 | CF052000 |
| DR366946 | DR349200 | BI421688 | BF050996 | CD975274 | CF052085 |
| DR366947 | DR240126 | BI421688 | BF051033 | CD975274 | CF053156 |
| DR366948 | DR240126 | BI421755 | BI422970 | CD975274 | CF053415 |

|          |          |          |          |          |          |
|----------|----------|----------|----------|----------|----------|
| DR366948 | DR349200 | BI421763 | AW930380 | CD975411 | CF039117 |
| DR366949 | DR240126 | BI421768 | BI421343 | CD975480 | CD975290 |
| DR366949 | DR349200 | BI421792 | AW624407 | CD975603 | CD972933 |
| DR366950 | DR240126 | BI421792 | BE459185 | CD975603 | CD972946 |
| DR366950 | DR349200 | BI421802 | AW030367 | CD975603 | CF036171 |
| DR366951 | DR240126 | BI421802 | AW033678 | CD975652 | CD971806 |
| DR366951 | DR349200 | BI421802 | AW033793 | CD975652 | CD972206 |
| DR366952 | DR240126 | BI421855 | AW033793 | CD975652 | CD972515 |
| DR366952 | DR349200 | BI421887 | AW033678 | CD975652 | CD972661 |
| DR366953 | DR349200 | BI421911 | AW031807 | CD975652 | CD973157 |
| DR366954 | DR240126 | BI421911 | AW648672 | CD975652 | CD973448 |
| DR366954 | DR349200 | BI421911 | AW651299 | CD975652 | CD973635 |
| DR366955 | DR240126 | BI421911 | BE458622 | CD975652 | CD973765 |
| DR366955 | DR349200 | BI421911 | BE460023 | CD975652 | CD974225 |
| DR366956 | DR240126 | BI421911 | BI921272 | CD975652 | CD974475 |
| DR366956 | DR349200 | BI421923 | AI896372 | CD975652 | CD975374 |
| DR366957 | DR349200 | BI421923 | AI899269 | CD975652 | CD976274 |
| DR366958 | DR240126 | BI421930 | AI484035 | CD975652 | CD977600 |
| DR366958 | DR349200 | BI421946 | AW030121 | CD975652 | CD978828 |
| DR366959 | DR240126 | BI421961 | AW622246 | CD975652 | CD985646 |
| DR366959 | DR349200 | BI421963 | AW033667 | CD975652 | CF043668 |
| DR366960 | DR240126 | BI421999 | AW033678 | CD975652 | CF060108 |
| DR366960 | DR349200 | BI422005 | AW621199 | CD975652 | CF060299 |
| DR366961 | DR240126 | BI422005 | AW621240 | CD975711 | CD972933 |
| DR366961 | DR349200 | BI422016 | AI486469 | CD975711 | CD972946 |
| DR366963 | DR240126 | BI422036 | AW033793 | CD975711 | CF036171 |
| DR366963 | DR349200 | BI422042 | AI771638 | CD975716 | CD973358 |
| DR366964 | DR240126 | BI422067 | AI488993 | CD975716 | CD973436 |
| DR366964 | DR349200 | BI422088 | AI485787 | CD976382 | CF036304 |
| DR366965 | DR349200 | BI422088 | AW621199 | CD976432 | CF036138 |
| DR366967 | DR240126 | BI422141 | AW033793 | CD976470 | CD978441 |
| DR366967 | DR349200 | BI422158 | AW944950 | CD976525 | CD977200 |
| DR366968 | DR349200 | BI422216 | AW033793 | CD976628 | CD977200 |
| DR366969 | DR240126 | BI422229 | AI488118 | CD976884 | CF057994 |
| DR366970 | DR240126 | BI422241 | BG135524 | CD976976 | CD978740 |
| DR366971 | DR240126 | BI422251 | AW030367 | CD977081 | CF036138 |
| DR366971 | DR349200 | BI422251 | AW033678 | CD977084 | CD977653 |
| DR366972 | DR240126 | BI422251 | AW033793 | CD977098 | CF021592 |
| DR366972 | DR349200 | BI422254 | AI485787 | CD977108 | CD971806 |
| DR367326 | DR276830 | BI422254 | AW621240 | CD977108 | CD972191 |
| DR367326 | DR276831 | BI422334 | AW030141 | CD977108 | CD972206 |
| DR367808 | DR353244 | BI422337 | AW033793 | CD977108 | CD972515 |
| DR367809 | DR353244 | BI422372 | AW932475 | CD977108 | CD972661 |
| DR367875 | DR277086 | BI422397 | AW031841 | CD977108 | CD973157 |
| DR367875 | DR305089 | BI422402 | AW621199 | CD977108 | CD973448 |
| DR367875 | DR305093 | BI422457 | AW031705 | CD977108 | CD973765 |
| DR368294 | DR368297 | BI422475 | AW932475 | CD977108 | CD974078 |
| DR368515 | DR334987 | BI422517 | AW033678 | CD977108 | CD974225 |
| DR368544 | DR212954 | BI422564 | AW033119 | CD977108 | CD974475 |
| DR368544 | DR231338 | BI422591 | AW030367 | CD977108 | CD977600 |
| DR368551 | DR262712 | BI422591 | AW033678 | CD977108 | CD978828 |
| DR368569 | DR359117 | BI422591 | AW033793 | CD977108 | CF043668 |

|          |          |          |          |          |          |
|----------|----------|----------|----------|----------|----------|
| DR368569 | DR359118 | BI422604 | AI489357 | CD977108 | CF060108 |
| DR368663 | DR350225 | BI422630 | AW033793 | CD977108 | CF060299 |
| DR368663 | DR350237 | BI422645 | AW030367 | CD977108 | CF060324 |
| DR368663 | DR350238 | BI422655 | AW030367 | CD977143 | CD986844 |
| DR368689 | DR369862 | BI422655 | AW033793 | CD977192 | CD977653 |
| DR368689 | DR369891 | BI422660 | AW033678 | CD977192 | CD986844 |
| DR368729 | DR287377 | BI422677 | AW621240 | CD977205 | CD977200 |
| DR368729 | DR287378 | BI422689 | AI486762 | CD977219 | CD977671 |
| DR368729 | DR287384 | BI422695 | AW030123 | CD977326 | CD978854 |
| DR368729 | DR287396 | BI422758 | AW033678 | CD977329 | CD976069 |
| DR368729 | DR287402 | BI422758 | AW033793 | CD977501 | CD977200 |
| DR368729 | DR287407 | BI422760 | AI771695 | CD977549 | CD986275 |
| DR368729 | DR287415 | BI422760 | AI899010 | CD977549 | CD989430 |
| DR368729 | DR287448 | BI422760 | AI899310 | CD977549 | CD997211 |
| DR368729 | DR287450 | BI422830 | AW033793 | CD977549 | CF043989 |
| DR368729 | DR287452 | BI422869 | AI489351 | CD977587 | CD976069 |
| DR368729 | DR287453 | BI422912 | AW030367 | CD977628 | CF040052 |
| DR368729 | DR287454 | BI422920 | AW033667 | CD977706 | CD977340 |
| DR368729 | DR287455 | BI422927 | AW033679 | CD977706 | CD977611 |
| DR368729 | DR287456 | BI422940 | AW621199 | CD977731 | CD977200 |
| DR368729 | DR287457 | BI422946 | BI423433 | CD977744 | CD976802 |
| DR368729 | DR287460 | BI422948 | AI486469 | CD977744 | CD981408 |
| DR368729 | DR287461 | BI422987 | AW030366 | CD977869 | CF041440 |
| DR368729 | DR287464 | BI423018 | AW030367 | CD977869 | CF042239 |
| DR368729 | DR287465 | BI423018 | AW033678 | CD977908 | CD978740 |
| DR368729 | DR287467 | BI423018 | AW033793 | CD978030 | CD972120 |
| DR368729 | DR287469 | BI423019 | BE451587 | CD978030 | CD976174 |
| DR368729 | DR287472 | BI423034 | AW030367 | CD978082 | CD978634 |
| DR368729 | DR287474 | BI423035 | BI928092 | CD978198 | CF047011 |
| DR368729 | DR287486 | BI423052 | BG135231 | CD978198 | CF047204 |
| DR368729 | DR287491 | BI423060 | BI423433 | CD978214 | CD967979 |
| DR368729 | DR287495 | BI423096 | AW030121 | CD978214 | CF058535 |
| DR368729 | DR287497 | BI423097 | AW030367 | CD978214 | CF058558 |
| DR368729 | DR287499 | BI423097 | AW033678 | CD978214 | CF058591 |
| DR368729 | DR287500 | BI423122 | AW030367 | CD978214 | CF058807 |
| DR368729 | DR287501 | BI423122 | AW033678 | CD978214 | CF058954 |
| DR368729 | DR287503 | BI423122 | AW033793 | CD978214 | CF058969 |
| DR368729 | DR287510 | BI423144 | AW033678 | CD978214 | CF059284 |
| DR368759 | DR252613 | BI423144 | AW033793 | CD978251 | CD976993 |
| DR368759 | DR252616 | BI423155 | AW033678 | CD978251 | CF033524 |
| DR368760 | DR252609 | BI423155 | AW033793 | CD978272 | CD977653 |
| DR368760 | DR252613 | BI423195 | AW033678 | CD978272 | CD986844 |
| DR368760 | DR252616 | BI423195 | AW033793 | CD978311 | CD972982 |
| DR368773 | DR354115 | BI423223 | AW030367 | CD978311 | CD973126 |
| DR368813 | DR350865 | BI423229 | AW033793 | CD978311 | CD974609 |
| DR368936 | DR254852 | BI423265 | AW030367 | CD978311 | CD976603 |
| DR368936 | DR254853 | BI423274 | AI895782 | CD978311 | CD977391 |
| DR368936 | DR254854 | BI423314 | AW934308 | CD978311 | CD985599 |
| DR368936 | DR254855 | BI423381 | BI930850 | CD978311 | CD986437 |
| DR368936 | DR254856 | BI921096 | AW621199 | CD978311 | CD987475 |
| DR368971 | DR297104 | BI921096 | AW621240 | CD978311 | CD987522 |
| DR368978 | DR292280 | BI921105 | AI489351 | CD978311 | CD988545 |

|                               |             |          |          |          |          |
|-------------------------------|-------------|----------|----------|----------|----------|
| DR368978                      | DR292283    | BI921108 | AW030367 | CD978311 | CD988742 |
| DR368978                      | DR292285    | BI921170 | AW030121 | CD978311 | CD990817 |
| DR369087                      | DR223940    | BI921188 | AW220221 | CD978311 | CD998176 |
| DR369087                      | DR223942    | BI921203 | AW737933 | CD978311 | CF033319 |
| DR369087                      | DR223943    | BI921227 | AW030367 | CD978311 | CF033329 |
| DR369087                      | DR223946    | BI921229 | AW030367 | CD978311 | CF035471 |
| DR369087                      | DR223952    | BI921229 | AW033678 | CD978311 | CF036390 |
| DR369087                      | DR223958    | BI921229 | AW033793 | CD978311 | CF036565 |
| DR369087                      | DR223959    | BI921316 | AW932475 | CD978311 | CF036704 |
| DR369087                      | DR223962    | BI921359 | AW030367 | CD978311 | CF038350 |
| DR369087                      | DR223964    | BI921388 | AW030367 | CD978311 | CF038731 |
| DR369199                      | DR363102    | BI921399 | AW034302 | CD978311 | CF038771 |
| DR369459                      | DR289611    | BI921406 | AW030367 | CD978311 | CF038914 |
| DR369459                      | DR289612    | BI921418 | AW030141 | CD978311 | CF039080 |
| DR369459                      | DR289613    | BI921424 | AI489351 | CD978311 | CF039430 |
| DR369459                      | DR289615    | BI921440 | AW030367 | CD978311 | CF042464 |
| DR369459                      | DR289618    | BI921495 | AW031129 | CD978311 | CF048560 |
| DR369459                      | DR289619    | BI921499 | AW931563 | CD978311 | CF048735 |
| DR369459                      | DR289620    | BI921521 | AW932475 | CD978311 | CF048974 |
| DR369459                      | DR289622    | BI921522 | AW932475 | CD978311 | CF050054 |
| DR369459                      | DR289623    | BI921523 | AW030367 | CD978311 | CF050691 |
| DR369459                      | DR289624    | BI921537 | AI897468 | CD978311 | CF052405 |
| DR369933                      | DR369069    | BI921537 | BI922990 | CD978311 | CF052956 |
| DR369934                      | DR369069    | BI921592 | AW030367 | CD978311 | CF053378 |
| DR382342                      | DR369768    | BI921630 | AI485787 | CD978311 | CF053456 |
| DR382452                      | DR369768    | BI921630 | AW621240 | CD978311 | CF053641 |
| DR382460                      | DR369768    | BI921632 | BI931541 | CD978311 | CF053812 |
| DR382570                      | DR226071    | BI921635 | AW030133 | CD978311 | CF054093 |
| DR382570                      | DR226072    | BI921640 | AI895782 | CD978311 | CF054271 |
| DR382570                      | DR242755    | BI921640 | AI895945 | CD978311 | CF054378 |
| DR382570                      | DR242767    | BI921646 | AW030367 | CD978311 | CF054439 |
| DR382570                      | DR242768    | BI921646 | AW033678 | CD978311 | CF054679 |
| DR382570                      | DR260669    | BI921646 | AW033793 | CD978311 | CF054741 |
| DR382570                      | DR260673    | BI921661 | AW033678 | CD978311 | CF055301 |
| DR383504                      | DR369768    | BI921668 | AI486120 | CD978311 | CF055467 |
| DR383989                      | DR202620    | BI921703 | BI928143 | CD978311 | CF055500 |
| <i>Lotus japon</i> gifu b-129 |             | BI921710 | BI921727 | CD978311 | CF055545 |
| <b>EST1</b>                   | <b>EST2</b> | BI921714 | AW030367 | CD978311 | CF055546 |
| AI967345                      | BI417640    | BI921714 | AW033678 | CD978311 | CF055548 |
| AI967345                      | BI419074    | BI921714 | AW033793 | CD978311 | CF055736 |
| AI967456                      | CB829296    | BI921723 | AW031013 | CD978311 | CF055918 |
| AI967595                      | BW596388    | BI921734 | AW030367 | CD978311 | CF058230 |
| AI967595                      | BW597072    | BI921734 | AW033793 | CD978345 | CD986142 |
| AI967651                      | CB829296    | BI921735 | AW030121 | CD978374 | CD971806 |
| AI967792                      | CB829296    | BI921736 | AW030367 | CD978374 | CD972515 |
| AI967825                      | BP070361    | BI921736 | AW033678 | CD978374 | CD973157 |
| AI967896                      | CB829296    | BI921736 | AW033793 | CD978374 | CD973448 |
| AU088768                      | BW597072    | BI921758 | AI485987 | CD978374 | CD974475 |
| AU088809                      | AU089188    | BI921768 | AW033793 | CD978374 | CD976274 |
| AU088983                      | BW596109    | BI921836 | BG642416 | CD978374 | CD977966 |
| AU089114                      | BW598801    | BI921892 | AW033793 | CD978374 | CD978828 |
| AU089137                      | BG662402    | BI921908 | AW030367 | CD978374 | CF043668 |



|          |          |          |          |          |          |
|----------|----------|----------|----------|----------|----------|
| AU089333 | BW596388 | BI921908 | AW033678 | CD978374 | CF060108 |
| AU089333 | BW597072 | BI921908 | AW033793 | CD978374 | CF060299 |
| AU089356 | AW720576 | BI921959 | AW031744 | CD978374 | CF060324 |
| AU089444 | BW598725 | BI921963 | AW033678 | CD978379 | CD976993 |
| AU089500 | AU251960 | BI921984 | AW030367 | CD978379 | CF033524 |
| AU089502 | BW596109 | BI922002 | AI485051 | CD978383 | CD971806 |
| AU089548 | BW596388 | BI922002 | AI489351 | CD978383 | CD972206 |
| AU089548 | BW597072 | BI922005 | AW033119 | CD978383 | CD972515 |
| AU089605 | BW596388 | BI922011 | BG134587 | CD978383 | CD973103 |
| AU089605 | BW597072 | BI922024 | AW030367 | CD978383 | CD973448 |
| AU240182 | BW595178 | BI922024 | AW033678 | CD978383 | CD973635 |
| AU240182 | BW597704 | BI922024 | AW033793 | CD978383 | CD973765 |
| AU251752 | BW598482 | BI922050 | AW033119 | CD978383 | CD974078 |
| AU251797 | BW598801 | BI922055 | AW030367 | CD978383 | CD974225 |
| AU251826 | BW596388 | BI922055 | AW033678 | CD978383 | CD974475 |
| AU251826 | BW597072 | BI922055 | AW033793 | CD978383 | CD975374 |
| AU251914 | AW720221 | BI922095 | AW033678 | CD978383 | CD977600 |
| AU252101 | BW597594 | BI922095 | AW033793 | CD978383 | CD978828 |
| AU252125 | BW596388 | BI922109 | AW030380 | CD978383 | CD985617 |
| AU252125 | BW597072 | BI922116 | AW219292 | CD978383 | CD985646 |
| AU252133 | BW598090 | BI922167 | AI487042 | CD978383 | CF043668 |
| AU252133 | CB828479 | BI922167 | AI777398 | CD978383 | CF060108 |
| AU252151 | BP063151 | BI922167 | AI897775 | CD978383 | CF060299 |
| AW163902 | BW598710 | BI922167 | AI898621 | CD978390 | CD988652 |
| AW428742 | BW596388 | BI922167 | BG128685 | CD978390 | CF057712 |
| AW428742 | BW597072 | BI922204 | AI483457 | CD978394 | CD977543 |
| AW719638 | BW599471 | BI922205 | AW033793 | CD978394 | CD977636 |
| AW719662 | BW628977 | BI922220 | AW030133 | CD978394 | CF033494 |
| AW719882 | BP063151 | BI922234 | AI899269 | CD978394 | CF033634 |
| AW719906 | BP059197 | BI922246 | AW030367 | CD978394 | CF033963 |
| AW719921 | AW720348 | BI922246 | AW033793 | CD978394 | CF039650 |
| AW719921 | BI417438 | BI922248 | AI485987 | CD978397 | CD971806 |
| AW719921 | CB827242 | BI922264 | AW033678 | CD978397 | CD972191 |
| AW719921 | CB828423 | BI922267 | AW033667 | CD978397 | CD972206 |
| AW719992 | BW626925 | BI922293 | AW030367 | CD978397 | CD972515 |
| AW720139 | CB827942 | BI922293 | AW033678 | CD978397 | CD972661 |
| AW720139 | CB828637 | BI922312 | AW030367 | CD978397 | CD973157 |
| AW720139 | CB829400 | BI922312 | AW033678 | CD978397 | CD973448 |
| AW720220 | AW720437 | BI922312 | AW033793 | CD978397 | CD973765 |
| AW720220 | AW720495 | BI922318 | AW030123 | CD978397 | CD974078 |
| AW720220 | AW720649 | BI922342 | AW030367 | CD978397 | CD974225 |
| AW720220 | BI419781 | BI922342 | AW033793 | CD978397 | CD974475 |
| AW720220 | BW632893 | BI922380 | AW216623 | CD978397 | CD977600 |
| AW720220 | CB826670 | BI922381 | AW030367 | CD978397 | CD978828 |
| AW720297 | BU494368 | BI922381 | AW033678 | CD978397 | CF043668 |
| AW720380 | BP066123 | BI922381 | AW033793 | CD978397 | CF060108 |
| AW720380 | CB826955 | BI922389 | AW219292 | CD978397 | CF060299 |
| AW720380 | CB827609 | BI922409 | AW932475 | CD978397 | CF060324 |
| AW720575 | CB826881 | BI922414 | AW033924 | CD978463 | CF047204 |
| AW720575 | CB828834 | BI922418 | AW030367 | CD978508 | CD978934 |
| AW720592 | BW598661 | BI922424 | BI931385 | CD978508 | CD978972 |
| AW720606 | CB829422 | BI922499 | AI485787 | CD978590 | CF040052 |

|          |          |          |          |          |          |
|----------|----------|----------|----------|----------|----------|
| AW720646 | CB827687 | BI922503 | AI485787 | CD978600 | CD977090 |
| AW720648 | CB829296 | BI922522 | AW033793 | CD978600 | CD978585 |
| BF177481 | BI418639 | BI922540 | AW622246 | CD978600 | CF033582 |
| BF177491 | BI420722 | BI922565 | AW030367 | CD978665 | CD976351 |
| BF177632 | CB829296 | BI922567 | AW033678 | CD978665 | CD978252 |
| BF177696 | BI418765 | BI922567 | AW033793 | CD978755 | CD978740 |
| BG662020 | CB829296 | BI922582 | AW932475 | CD978937 | CF042239 |
| BG662051 | CB829296 | BI922595 | BI924696 | CD978937 | CF042804 |
| BG662065 | BW596094 | BI922610 | AW033713 | CD978960 | CD985465 |
| BG662290 | CB828786 | BI922618 | AW621917 | CD979131 | CD977543 |
| BG662408 | AI967387 | BI922648 | AW030141 | CD979131 | CD977636 |
| BG662408 | AU089422 | BI922687 | AW033793 | CD979131 | CF033494 |
| BG662408 | BI417339 | BI922690 | AW932475 | CD979131 | CF033667 |
| BG662408 | BI419750 | BI922723 | AW033793 | CD979186 | CD979256 |
| BG662408 | BI420760 | BI922728 | AW030367 | CD979302 | CD979333 |
| BG662408 | BP058358 | BI922728 | AW033678 | CD979323 | CD975290 |
| BG662408 | BP059141 | BI922767 | BI421720 | CD979374 | CD979257 |
| BG662408 | BP060255 | BI922807 | AW033678 | CD979600 | CD981244 |
| BG662408 | BP060361 | BI922812 | AW030121 | CD979601 | CD990074 |
| BG662408 | BP061206 | BI922821 | AI488269 | CD979620 | CD975290 |
| BG662408 | BP062177 | BI922872 | AW218507 | CD979626 | CF051818 |
| BG662408 | BP067868 | BI922881 | AW932475 | CD980022 | CD998772 |
| BG662408 | BP068488 | BI922898 | AW030121 | CD980022 | CF051818 |
| BG662408 | BP068745 | BI922915 | AW030367 | CD980051 | CD968318 |
| BG662408 | BP069282 | BI922915 | AW033678 | CD980051 | CD968342 |
| BG662408 | BP069295 | BI922915 | AW033793 | CD980051 | CD968397 |
| BG662408 | BP069584 | BI922945 | AW035342 | CD980051 | CD968487 |
| BG662408 | BP069623 | BI922945 | BI423139 | CD980051 | CD969024 |
| BG662408 | BP069794 | BI922957 | AW030367 | CD980051 | CD969209 |
| BG662408 | BP070466 | BI922964 | AW031841 | CD980051 | CD969257 |
| BG662408 | BP070477 | BI922973 | AW033678 | CD980051 | CD969372 |
| BG662408 | BP070624 | BI922982 | AW030367 | CD980051 | CD969496 |
| BG662408 | BP070802 | BI922982 | AW033678 | CD980051 | CD969730 |
| BG662408 | BP071190 | BI923010 | BI923037 | CD980051 | CD969856 |
| BG662408 | BP071270 | BI923020 | AW030123 | CD980087 | CD979921 |
| BG662408 | BP071471 | BI923035 | AW033793 | CD980105 | CF035023 |
| BG662408 | BP071681 | BI923064 | AW030773 | CD980200 | CF059131 |
| BG662408 | BP072426 | BI923064 | AW033686 | CD980292 | CD975290 |
| BG662408 | BP072493 | BI923064 | BI422457 | CD980320 | CD979451 |
| BG662408 | BP074050 | BI923064 | BI423057 | CD980326 | CD980089 |
| BG662408 | BP074247 | BI923071 | AI487444 | CD980386 | CD979176 |
| BG662408 | BP074255 | BI923071 | AW218838 | CD980386 | CD979946 |
| BG662408 | BP074274 | BI923071 | BG134983 | CD980386 | CD979979 |
| BG662434 | CN825354 | BI923077 | AI489351 | CD980407 | CD980431 |
| BG662463 | BW598725 | BI923079 | AW030121 | CD980407 | CD980780 |
| BI417212 | BW626925 | BI923086 | AW030102 | CD980469 | CD987482 |
| BI417251 | BW630953 | BI923092 | AW033793 | CD980476 | CD979333 |
| BI417462 | CB826881 | BI923100 | AW944740 | CD980554 | CF042622 |
| BI417607 | CB827282 | BI923114 | AW030192 | CD980555 | CD987482 |
| BI417613 | CB827777 | BI923121 | AW221091 | CD980557 | CD979703 |
| BI417633 | AU089149 | BI923121 | AW932370 | CD980557 | CD980403 |
| BI417649 | BW597280 | BI923125 | AW030377 | CD980557 | CD980404 |

|          |          |          |          |          |          |
|----------|----------|----------|----------|----------|----------|
| BI417683 | BI418510 | BI923126 | AW031841 | CD980557 | CD980799 |
| BI417683 | BW598482 | BI923136 | AW030367 | CD980557 | CD980861 |
| BI417766 | CB826881 | BI923145 | AW033678 | CD980557 | CD980967 |
| BI417793 | CB826881 | BI923145 | AW033793 | CD980557 | CD981108 |
| BI417793 | CB828834 | BI923151 | BI931939 | CD980557 | CD981162 |
| BI417793 | CB829422 | BI923154 | AW030192 | CD980557 | CD981256 |
| BI417803 | BW598725 | BI923176 | AW031705 | CD980557 | CD981267 |
| BI417826 | BI418196 | BI923194 | AW033678 | CD980557 | CD981575 |
| BI417826 | BW594987 | BI923195 | BI922874 | CD980557 | CF033855 |
| BI417882 | BW596124 | BI923238 | AW030367 | CD980557 | CF050697 |
| BI417882 | BW631151 | BI923255 | AW030367 | CD980562 | CD980247 |
| BI418010 | BP062197 | BI923255 | AW033678 | CD980742 | CD980705 |
| BI418080 | BW626925 | BI923255 | AW033793 | CD980742 | CD981272 |
| BI418127 | BW628977 | BI923267 | AW030367 | CD980742 | CF060115 |
| BI418141 | CB828687 | BI923278 | BI423433 | CD980783 | CD979529 |
| BI418147 | CB828687 | BI923281 | AI486469 | CD980783 | CD980378 |
| BI418171 | CB826881 | BI923286 | AW030367 | CD980783 | CD980413 |
| BI418172 | CB828834 | BI923286 | AW033678 | CD980783 | CD980442 |
| BI418222 | AW720348 | BI923286 | AW033793 | CD980783 | CD980497 |
| BI418222 | BI417438 | BI923321 | AW649566 | CD980783 | CD980590 |
| BI418222 | CB827242 | BI923321 | AW933172 | CD980783 | CD980653 |
| BI418222 | CB829686 | BI923333 | BG123887 | CD980783 | CD980883 |
| BI418244 | BI418569 | BI923344 | AW737933 | CD980783 | CD981114 |
| BI418244 | CB826793 | BI923350 | AW033678 | CD980783 | CD981130 |
| BI418263 | CB827282 | BI923350 | AW033793 | CD980783 | CD981212 |
| BI418375 | CB828834 | BI923363 | AI487717 | CD980783 | CD981237 |
| BI418381 | CB827687 | BI923363 | AI490147 | CD980783 | CD981259 |
| BI418381 | CB828169 | BI923367 | BG126814 | CD980783 | CD981449 |
| BI418391 | CB829422 | BI923375 | BE458328 | CD980810 | CD979587 |
| BI418409 | CB826881 | BI923402 | AW030367 | CD980810 | CD979597 |
| BI418422 | CB826881 | BI923402 | AW033678 | CD980810 | CD979993 |
| BI418422 | CB828834 | BI923402 | AW033793 | CD980810 | CD980494 |
| BI418575 | BI418001 | BI923415 | AW429161 | CD980810 | CD980580 |
| BI418575 | BI419122 | BI923441 | AW979600 | CD980810 | CD980605 |
| BI418575 | BP068749 | BI923451 | BI922590 | CD980810 | CD981268 |
| BI418575 | BP069550 | BI923466 | AW030367 | CD980875 | CD979231 |
| BI418575 | BP069650 | BI923466 | AW033678 | CD980875 | CD979587 |
| BI418575 | BP070467 | BI923466 | AW033793 | CD980875 | CD979597 |
| BI418575 | BP070609 | BI923487 | AW031841 | CD980875 | CD979993 |
| BI418575 | BP071260 | BI923527 | BI928753 | CD980875 | CD980432 |
| BI418575 | BP072686 | BI923529 | BG123623 | CD980875 | CD980580 |
| BI418575 | BP073707 | BI923573 | AI489351 | CD980875 | CD980605 |
| BI418586 | CB827282 | BI923620 | AI489351 | CD980875 | CD980625 |
| BI418600 | CB829084 | BI923727 | AW623652 | CD980875 | CD980631 |
| BI418623 | CB827282 | BI923965 | AI489351 | CD980875 | CD981268 |
| BI418625 | CB828687 | BI924174 | AW216994 | CD980875 | CD981293 |
| BI418727 | BP071320 | BI924188 | BI930022 | CD980890 | CD979789 |
| BI418804 | CB828540 | BI924225 | AW217096 | CD980890 | CD985703 |
| BI418822 | BI420722 | BI924225 | AW429123 | CD980891 | CD979529 |
| BI418919 | BP065183 | BI924242 | AW735906 | CD980891 | CD980305 |
| BI418957 | BW595586 | BI924243 | AI486972 | CD980891 | CD980378 |
| BI419084 | CB827282 | BI924288 | AW735906 | CD980891 | CD980442 |

|          |          |          |          |          |          |
|----------|----------|----------|----------|----------|----------|
| BI419092 | BP073714 | BI924350 | BG129184 | CD980891 | CD980497 |
| BI419092 | BP073791 | BI924350 | BI423355 | CD980891 | CD980590 |
| BI419192 | CB828834 | BI924350 | BI924624 | CD980891 | CD980653 |
| BI419192 | CB829422 | BI924389 | BI932956 | CD980891 | CD980883 |
| BI419199 | CB826881 | BI924402 | AI484883 | CD980891 | CD981130 |
| BI419199 | CB828834 | BI924431 | AW032289 | CD980891 | CD981212 |
| BI419226 | CB826881 | BI924437 | AW032198 | CD980891 | CD981237 |
| BI419241 | AW720029 | BI924437 | AW622007 | CD980891 | CD981259 |
| BI419241 | BI420155 | BI924437 | BI422674 | CD980920 | CD979587 |
| BI419241 | BI420624 | BI924437 | BI928296 | CD980920 | CD979597 |
| BI419241 | BI420626 | BI924437 | BI934029 | CD980920 | CD979993 |
| BI419241 | CB826916 | BI924487 | BI931952 | CD980920 | CD980494 |
| BI419292 | CB826881 | BI924568 | AI485051 | CD980920 | CD980580 |
| BI419292 | CB828834 | BI924568 | AI489351 | CD980920 | CD980605 |
| BI419296 | CB826881 | BI924616 | BI930229 | CD980920 | CD980625 |
| BI419307 | AU089549 | BI924673 | AW934334 | CD980920 | CD980631 |
| BI419307 | BI418874 | BI924676 | BG128734 | CD980920 | CD980743 |
| BI419307 | BI420360 | BI924676 | BG129299 | CD980920 | CD981268 |
| BI419307 | BW594438 | BI924676 | BG130314 | CD980924 | CD980369 |
| BI419307 | BW594943 | BI924760 | BG642767 | CD980924 | CD980379 |
| BI419307 | BW595531 | BI924765 | BG123820 | CD980924 | CD980403 |
| BI419307 | BW595816 | BI924816 | BG128734 | CD980924 | CD980861 |
| BI419307 | BW595902 | BI924816 | BG129299 | CD980924 | CD980967 |
| BI419307 | BW595922 | BI924816 | BG130314 | CD980924 | CD981035 |
| BI419307 | BW596364 | BI924872 | BG128734 | CD980924 | CD981108 |
| BI419307 | BW596384 | BI924872 | BG129299 | CD980924 | CD981162 |
| BI419307 | BW596999 | BI924872 | BG130314 | CD980924 | CD981267 |
| BI419307 | BW597325 | BI924872 | BG642615 | CD980924 | CF033765 |
| BI419307 | BW597514 | BI924944 | BI926001 | CD980924 | CF034243 |
| BI419307 | BW597662 | BI924958 | AW931340 | CD980939 | CD980555 |
| BI419307 | BW599610 | BI925005 | AW625795 | CD980939 | CD980747 |
| BI419307 | BW600202 | BI925005 | BE450718 | CD980939 | CD980932 |
| BI419307 | CB827101 | BI925005 | BG130977 | CD980939 | CD981034 |
| BI419314 | CB826881 | BI925005 | BG133059 | CD980939 | CD981215 |
| BI419314 | CB828834 | BI925029 | AI895945 | CD980939 | CD981238 |
| BI419323 | CB826881 | BI925029 | BI423433 | CD980939 | CD981242 |
| BI419323 | CB828834 | BI925047 | BI927521 | CD980970 | CD980383 |
| BI419356 | BF177799 | BI925079 | AW738258 | CD980970 | CD980552 |
| BI419356 | BI418732 | BI925211 | AW928368 | CD980970 | CD980585 |
| BI419356 | BI420375 | BI925211 | BG642629 | CD980970 | CD980599 |
| BI419356 | BW599759 | BI925250 | AW030086 | CD980970 | CD980603 |
| BI419433 | CB826793 | BI925271 | AI486854 | CD980970 | CD980655 |
| BI419450 | CB829084 | BI925271 | AI897184 | CD980970 | CD980753 |
| BI419459 | BW598661 | BI925271 | AI897379 | CD980970 | CD980790 |
| BI419473 | CB827282 | BI925271 | AI897854 | CD980970 | CD980837 |
| BI419474 | BW598725 | BI925271 | AI897932 | CD980970 | CD981253 |
| BI419530 | CB827242 | BI925271 | AI899010 | CD980970 | CF048272 |
| BI419530 | CB829686 | BI925271 | AI899310 | CD980970 | CF048276 |
| BI419601 | CB826881 | BI925271 | BF050996 | CD980970 | CF059887 |
| BI419601 | CB828834 | BI925271 | BF051033 | CD980984 | CD980429 |
| BI419626 | BI418508 | BI925304 | BI932960 | CD980984 | CD980869 |
| BI419680 | BP063003 | BI925430 | AW930070 | CD980984 | CD980972 |

|          |          |          |          |          |          |
|----------|----------|----------|----------|----------|----------|
| BI419709 | BI419122 | BI925504 | BI924344 | CD981013 | CD987482 |
| BI419709 | BP069550 | BI925598 | AW932562 | CD981034 | CD987482 |
| BI419709 | BP069650 | BI925641 | AW928747 | CD981141 | CD979834 |
| BI419709 | BP073421 | BI925641 | BI925923 | CD981141 | CD980290 |
| BI419709 | BP073707 | BI925698 | AW735906 | CD981141 | CD980736 |
| BI419764 | CB829422 | BI925699 | BI930960 | CD981141 | CD981033 |
| BI419797 | BI417749 | BI925818 | AW737241 | CD981141 | CD981151 |
| BI419797 | BI419093 | BI925853 | AW217591 | CD981141 | CF038648 |
| BI419797 | BP060443 | BI925853 | BE459646 | CD981141 | CF041556 |
| BI419828 | CB828834 | BI925853 | BG123154 | CD981141 | CF051561 |
| BI419828 | CB829422 | BI925853 | BG126636 | CD981141 | CF053066 |
| BI420044 | CB829296 | BI925853 | BI932743 | CD981141 | CF054331 |
| BI420050 | BI419216 | BI925966 | BI926428 | CD981141 | CF055372 |
| BI420220 | CB827777 | BI926022 | BI926428 | CD981141 | CF059792 |
| BI420367 | BI420722 | BI926048 | BI922637 | CD981141 | CF060330 |
| BI420524 | BI420722 | BI926056 | BI921785 | CD981182 | CD979979 |
| BI420528 | AW720029 | BI926118 | BG127304 | CD981204 | CD979939 |
| BI420528 | BI420155 | BI926142 | BI423433 | CD981204 | CD980104 |
| BI420528 | CB826916 | BI926193 | AW624085 | CD981204 | CD988256 |
| BI420648 | BW626925 | BI926193 | AW930070 | CD981238 | CD987482 |
| BI420727 | BI417496 | BI926203 | BI930850 | CD981260 | CD979231 |
| BI420727 | BI417749 | BI926225 | BI925128 | CD981260 | CD979587 |
| BI420727 | BI419093 | BI926225 | BI925453 | CD981260 | CD980580 |
| BI420727 | BP060443 | BI926225 | BI925942 | CD981260 | CD980605 |
| BI420756 | BI418510 | BI926225 | BI931525 | CD981260 | CD981268 |
| BI420756 | BW598482 | BI926238 | AW648087 | CD981260 | CD981293 |
| BI420758 | CB828687 | BI926238 | AW944911 | CD981276 | CD979939 |
| BI420841 | BI417749 | BI926238 | BG134418 | CD981276 | CD980104 |
| BI420841 | BP060443 | BI926498 | AW221116 | CD981276 | CF042622 |
| BI420931 | CB829422 | BI926512 | AI771696 | CD981279 | CF047577 |
| BI420950 | CB826881 | BI926536 | BG126488 | CD981305 | CD979587 |
| BI420968 | CB828781 | BI926536 | BG129368 | CD981305 | CD980580 |
| BI421012 | CB828834 | BI926536 | BI422779 | CD981466 | CD985555 |
| BP058343 | BP067405 | BI926536 | BI931168 | CD981744 | CF059131 |
| BP058366 | BW598661 | BI926587 | AI486854 | CD981766 | CF059131 |
| BP058466 | BP061905 | BI926587 | AI897184 | CD981854 | CD985555 |
| BP058469 | BP058359 | BI926587 | AI897854 | CD982604 | CD983182 |
| BP058469 | BP058372 | BI926587 | AI897932 | CD982635 | CD971578 |
| BP058469 | BP058593 | BI926587 | AI899010 | CD982635 | CD973197 |
| BP058469 | BP058660 | BI926587 | AI899310 | CD982635 | CD981984 |
| BP058469 | BP058859 | BI926587 | BF050996 | CD982635 | CD982031 |
| BP058469 | BP059129 | BI926587 | BF051033 | CD982635 | CD982032 |
| BP058469 | BP059143 | BI926640 | AI898456 | CD982640 | CD976030 |
| BP058469 | BP059292 | BI926648 | AW624697 | CD982640 | CF048910 |
| BP058469 | BP059311 | BI926648 | AW944825 | CD982640 | CF051449 |
| BP058469 | BP059389 | BI926675 | AW932475 | CD982691 | CD973573 |
| BP058469 | BP059523 | BI926704 | BI932764 | CD982691 | CD974906 |
| BP058469 | BP059772 | BI926711 | AI489351 | CD982691 | CD982927 |
| BP058469 | BP059855 | BI926714 | BI927087 | CD982691 | CD983033 |
| BP058469 | BP059869 | BI926718 | BG642742 | CD982691 | CD983490 |
| BP058469 | BP060081 | BI926832 | AW932562 | CD982691 | CD983744 |
| BP058469 | BP060153 | BI926861 | BI933271 | CD982691 | CD983827 |

|          |          |          |          |          |          |
|----------|----------|----------|----------|----------|----------|
| BP058469 | BP060365 | BI926876 | BF051076 | CD982691 | CD983983 |
| BP058469 | BP060475 | BI926878 | BI924623 | CD982691 | CD984508 |
| BP058469 | BP060530 | BI926888 | AW035342 | CD982691 | CD984934 |
| BP058469 | BP060581 | BI926893 | BG644109 | CD982691 | CD984982 |
| BP058469 | BP060748 | BI926893 | BI924612 | CD982691 | CD984989 |
| BP058469 | BP060789 | BI926976 | AI487087 | CD982691 | CD985059 |
| BP058469 | BP060790 | BI926976 | AW934414 | CD982691 | CF033916 |
| BP058469 | BP060821 | BI926976 | BG127303 | CD982809 | CD971578 |
| BP058469 | BP060840 | BI926976 | BI923771 | CD982809 | CD973197 |
| BP058469 | BP060849 | BI926976 | BI930883 | CD982809 | CD981984 |
| BP058469 | BP060932 | BI927068 | AW934217 | CD982809 | CD982031 |
| BP058469 | BP060957 | BI927115 | AW626088 | CD982809 | CD982032 |
| BP058469 | BP060998 | BI927115 | BG132226 | CD982925 | CD976030 |
| BP058469 | BP061071 | BI927131 | AW622742 | CD982925 | CF048910 |
| BP058469 | BP061185 | BI927131 | AW648800 | CD982925 | CF051449 |
| BP058469 | BP061327 | BI927159 | BI422502 | CD982966 | CD976022 |
| BP058469 | BP061340 | BI927159 | BI933549 | CD982966 | CD976051 |
| BP058469 | BP061466 | BI927159 | BI934301 | CD982966 | CD976517 |
| BP058469 | BP061534 | BI927204 | AI485051 | CD982966 | CD976582 |
| BP058469 | BP061679 | BI927204 | AI489351 | CD982966 | CD976962 |
| BP058469 | BP067549 | BI927260 | BI932634 | CD982966 | CD978553 |
| BP058469 | BP067628 | BI927289 | AW033872 | CD982966 | CD978780 |
| BP058469 | BP068695 | BI927289 | BF114095 | CD982966 | CD979810 |
| BP058469 | BP068698 | BI927354 | BI931505 | CD982966 | CD979811 |
| BP058469 | BP068711 | BI927448 | AI485253 | CD982966 | CD981395 |
| BP058469 | BP068907 | BI927448 | AI897979 | CD982966 | CD981604 |
| BP058469 | BP069428 | BI927448 | AW032110 | CD982966 | CD981606 |
| BP058469 | BP069583 | BI927448 | AW218456 | CD982966 | CD981639 |
| BP058469 | BP069854 | BI927448 | AW623858 | CD982966 | CD981790 |
| BP058469 | BP070045 | BI927448 | AW623942 | CD982966 | CD981810 |
| BP058469 | BP070095 | BI927448 | AW626176 | CD982966 | CD981909 |
| BP058469 | BP070173 | BI927448 | AW648833 | CD982966 | CD982058 |
| BP058469 | BP070286 | BI927448 | AW649758 | CD982966 | CD982356 |
| BP058469 | BP070599 | BI927448 | BE462327 | CD982966 | CD982510 |
| BP058469 | BP070659 | BI927448 | BG126460 | CD982966 | CD982548 |
| BP058469 | BP070666 | BI927448 | BG127191 | CD982966 | CD982616 |
| BP058469 | BP070932 | BI927448 | BG128456 | CD982966 | CD982647 |
| BP058469 | BP071139 | BI927448 | BG131762 | CD982966 | CD982704 |
| BP058469 | BP071250 | BI927448 | BG134044 | CD982966 | CD982785 |
| BP058469 | BP071501 | BI927448 | BI928286 | CD982966 | CD982819 |
| BP058469 | BP071726 | BI927448 | BI931696 | CD982966 | CD982913 |
| BP058469 | BP071781 | BI927448 | BI932385 | CD982966 | CD982918 |
| BP058469 | BP073113 | BI927479 | AI490947 | CD982966 | CD982954 |
| BP058469 | BP073377 | BI927479 | AI897653 | CD982966 | CD982971 |
| BP058469 | BP073726 | BI927479 | AW737819 | CD982966 | CD982983 |
| BP058469 | BP073882 | BI927479 | AW930346 | CD982966 | CD982984 |
| BP058469 | BP074724 | BI927479 | AW931777 | CD982966 | CD983057 |
| BP058469 | BP074774 | BI927479 | AW934276 | CD982966 | CD983061 |
| BP058469 | CB829566 | BI927479 | BG123457 | CD982966 | CD983133 |
| BP058590 | CB829422 | BI927479 | BG125341 | CD982966 | CD983143 |
| BP058704 | BP058671 | BI927479 | BG126699 | CD982966 | CD983212 |
| BP058704 | BP067373 | BI927479 | BG127960 | CD982966 | CD983253 |

|          |          |          |          |          |          |
|----------|----------|----------|----------|----------|----------|
| BP058706 | CB828376 | BI927479 | BG135887 | CD982966 | CD983259 |
| BP058736 | BP063782 | BI927479 | BG642668 | CD982966 | CD983264 |
| BP058736 | BP067108 | BI927479 | BI927225 | CD982966 | CD983297 |
| BP058736 | BP067126 | BI927479 | BI928009 | CD982966 | CD983420 |
| BP058751 | BP069289 | BI927479 | BI928227 | CD982966 | CD983450 |
| BP058826 | BW598212 | BI927479 | BI928689 | CD982966 | CD983472 |
| BP058920 | BW598661 | BI927479 | BI928705 | CD983001 | CD981493 |
| BP059241 | BP063151 | BI927499 | BI931505 | CD983001 | CD981779 |
| BP059262 | BW599644 | BI927605 | AI491196 | CD983001 | CD982462 |
| BP059316 | BW626925 | BI927683 | BI928770 | CD983001 | CD982790 |
| BP059431 | BP058671 | BI927714 | BI934414 | CD983001 | CD982964 |
| BP059431 | BP064792 | BI927901 | AI483158 | CD983001 | CD982989 |
| BP059431 | BP067373 | BI927901 | AI483194 | CD983017 | CD971578 |
| BP059495 | BP058671 | BI927901 | AW623590 | CD983017 | CD981984 |
| BP059495 | BP067373 | BI927901 | AW623631 | CD983017 | CD982031 |
| BP059525 | BP061449 | BI927901 | AW647924 | CD983036 | CD971578 |
| BP059631 | BP058671 | BI927901 | AW648126 | CD983036 | CD973197 |
| BP059631 | BP067373 | BI927901 | AW650940 | CD983036 | CD982031 |
| BP059831 | BP063151 | BI927901 | AW735910 | CD983045 | CD971578 |
| BP059859 | BP063151 | BI927901 | AW929660 | CD983045 | CD973197 |
| BP059922 | BP063151 | BI927901 | BG123537 | CD983045 | CD981984 |
| BP059957 | BP061167 | BI927901 | BG129292 | CD983064 | CD981848 |
| BP060088 | BP061192 | BI927901 | BG643328 | CD983064 | CD981995 |
| BP060105 | BP067607 | BI927901 | BG643874 | CD983064 | CD983339 |
| BP060105 | BW596577 | BI927901 | BI931875 | CD983064 | CD983447 |
| BP060465 | BW599644 | BI927903 | BI925878 | CD983064 | CD983452 |
| BP060535 | CB826881 | BI927931 | BI921804 | CD983064 | CD983483 |
| BP060599 | BP065709 | BI927934 | AW649925 | CD983064 | CD983900 |
| BP060646 | CB828376 | BI927941 | AW735906 | CD983064 | CD988885 |
| BP060646 | CB829422 | BI927955 | AW621830 | CD983064 | CD997064 |
| BP060749 | BP059621 | BI927979 | AI489351 | CD983064 | CF033356 |
| BP060749 | BP060494 | BI928061 | AW944935 | CD983102 | CD983182 |
| BP060749 | BP061898 | BI928072 | AI482663 | CD983162 | CD971578 |
| BP060749 | BP070036 | BI928072 | AI482890 | CD983162 | CD973197 |
| BP060749 | BP072572 | BI928072 | AW220884 | CD983162 | CD981984 |
| BP060824 | BP063151 | BI928072 | AW737441 | CD983197 | CD980396 |
| BP060931 | CB829215 | BI928072 | BE353348 | CD983503 | CD968723 |
| BP060950 | BW598661 | BI928072 | BE459719 | CD983503 | CD979542 |
| BP061033 | BP063151 | BI928072 | BI925319 | CD983503 | CD979675 |
| BP061182 | BP062999 | BI928072 | BI925778 | CD983503 | CD979676 |
| BP061215 | BI418386 | BI928072 | BI926351 | CD983503 | CD982206 |
| BP061215 | BP069289 | BI928072 | BI933218 | CD983503 | CD983806 |
| BP061215 | BP073475 | BI928079 | BI928127 | CD983503 | CD983998 |
| BP061231 | BW598661 | BI928089 | BI932764 | CD983503 | CD984066 |
| BP061260 | BP063151 | BI928148 | AW930070 | CD983503 | CD984067 |
| BP061297 | BW598661 | BI928179 | AW621830 | CD983503 | CD984708 |
| BP061369 | AU252013 | BI928326 | BE451059 | CD983503 | CD984834 |
| BP061445 | BP063151 | BI928382 | BI924623 | CD983503 | CD984880 |
| BP061457 | BP065485 | BI928442 | AW934334 | CD983737 | CD975290 |
| BP061630 | BP063151 | BI928494 | AW624407 | CD983883 | CD984570 |
| BP061873 | BP059197 | BI928514 | AW035342 | CD984021 | CD975290 |
| BP061938 | BW598661 | BI928514 | BI423139 | CD984290 | CD968723 |

|          |          |          |          |          |          |
|----------|----------|----------|----------|----------|----------|
| BP061975 | BP073989 | BI928551 | BI927293 | CD984290 | CD969433 |
| BP061978 | BW596932 | BI928551 | BI933235 | CD984290 | CD975510 |
| BP061978 | BW597680 | BI928627 | AI489351 | CD984290 | CD979543 |
| BP062005 | BP058671 | BI928748 | AI486645 | CD984290 | CD979675 |
| BP062005 | BP064792 | BI928748 | AI488813 | CD984290 | CD979676 |
| BP062005 | BP067373 | BI928748 | AI898519 | CD984290 | CD983806 |
| BP062260 | BP071902 | BI928748 | AW931861 | CD984290 | CD983865 |
| BP062344 | BP063151 | BI928748 | BI930479 | CD984290 | CD983998 |
| BP062397 | BP063363 | BI928847 | AI482663 | CD984290 | CD984066 |
| BP062397 | BP066805 | BI928847 | AI482890 | CD984290 | CD984067 |
| BP062397 | BP072651 | BI928847 | AW033895 | CD984290 | CD984708 |
| BP062452 | BP067373 | BI928847 | AW220884 | CD984290 | CD984880 |
| BP062461 | CN825649 | BI928847 | AW651368 | CD984290 | CD988261 |
| BP062516 | BP063151 | BI928847 | AW737441 | CD984345 | CD983780 |
| BP062531 | BP063346 | BI928847 | AW931341 | CD984345 | CD983781 |
| BP062531 | BP066068 | BI928847 | AW934160 | CD984345 | CD983909 |
| BP062546 | BP058671 | BI928847 | AW944765 | CD984345 | CD984653 |
| BP062557 | BP066069 | BI928847 | AW979899 | CD984345 | CD984994 |
| BP062609 | CB826881 | BI928847 | BE353348 | CD984345 | CD985050 |
| BP062609 | CB828834 | BI928847 | BE353798 | CD984345 | CD990215 |
| BP062625 | AU254058 | BI928847 | BE354197 | CD984794 | CF029966 |
| BP062625 | AW720557 | BI928847 | BE459719 | CD984798 | CD968723 |
| BP062625 | BI418135 | BI928847 | BE463229 | CD984798 | CD975510 |
| BP062625 | BI418992 | BI928847 | BF052049 | CD984798 | CD979542 |
| BP062625 | BI419164 | BI928847 | BI923537 | CD984798 | CD979675 |
| BP062625 | BI420929 | BI928847 | BI925137 | CD984798 | CD979676 |
| BP062625 | BP058809 | BI928847 | BI925319 | CD984798 | CD982206 |
| BP062625 | BP062601 | BI928847 | BI925778 | CD984798 | CD983806 |
| BP062625 | BP062762 | BI928847 | BI926230 | CD984798 | CD983998 |
| BP062625 | BP062844 | BI928847 | BI926351 | CD984798 | CD984066 |
| BP062625 | BP063645 | BI928847 | BI926632 | CD984798 | CD984067 |
| BP062625 | BP063670 | BI928847 | BI929881 | CD984798 | CD984834 |
| BP062625 | BP064181 | BI928847 | BI933218 | CD984798 | CD984880 |
| BP062625 | BP064378 | BI928847 | BI935046 | CD984828 | CF029966 |
| BP062625 | BP064419 | BI928871 | BI932978 | CD984846 | CF056704 |
| BP062625 | BP064684 | BI928899 | AW625467 | CD984854 | CD983999 |
| BP062625 | BP064778 | BI928899 | BE459187 | CD984854 | CF056704 |
| BP062625 | BP064937 | BI928899 | BG126731 | CD984885 | CD984570 |
| BP062625 | BP065058 | BI928944 | AW621216 | CD984887 | CD984630 |
| BP062625 | BP065161 | BI928963 | BI932907 | CD984950 | CD985555 |
| BP062625 | BP065827 | BI929170 | BI930418 | CD985000 | CD988411 |
| BP062625 | BP066165 | BI929202 | BF050270 | CD985000 | CF059785 |
| BP062625 | BP066974 | BI929202 | BF051615 | CD985020 | CD988411 |
| BP062625 | BP067372 | BI929211 | BG135665 | CD985206 | CD984570 |
| BP062625 | BP075900 | BI929221 | BI923091 | CD985463 | CD990410 |
| BP062625 | CB826861 | BI929281 | AW622996 | CD985463 | CF053327 |
| BP062625 | CB826938 | BI929282 | AW032222 | CD985514 | CD987288 |
| BP062625 | CB826969 | BI929282 | AW738555 | CD985524 | CD977002 |
| BP062625 | CB827038 | BI929383 | BI932571 | CD985524 | CD989442 |
| BP062625 | CB827363 | BI929456 | AW735906 | CD985524 | CF032855 |
| BP062625 | CB827388 | BI929500 | AI489351 | CD985672 | CD976657 |
| BP062625 | CB827399 | BI929538 | BI934464 | CD985672 | CD978016 |



|          |          |          |          |          |          |
|----------|----------|----------|----------|----------|----------|
| BP062625 | CB827404 | BI929569 | AW622742 | CD985672 | CD985567 |
| BP062625 | CB827516 | BI929569 | AW648800 | CD985672 | CD988983 |
| BP062625 | CB827546 | BI929586 | AW929621 | CD985672 | CD989275 |
| BP062625 | CB827649 | BI929634 | BE450493 | CD985672 | CF033235 |
| BP062625 | CB827838 | BI929634 | BE450494 | CD985672 | CF033520 |
| BP062625 | CB828044 | BI929662 | AW218355 | CD985672 | CF058454 |
| BP062625 | CB828078 | BI929662 | AW622023 | CD985672 | CF058563 |
| BP062625 | CB828109 | BI929683 | BI930850 | CD985672 | CF058592 |
| BP062625 | CB828194 | BI929737 | AI771695 | CD985672 | CF058616 |
| BP062625 | CB828198 | BI929737 | AI897379 | CD985672 | CF058663 |
| BP062625 | CB828234 | BI929737 | AI899310 | CD985672 | CF058691 |
| BP062625 | CB828257 | BI929764 | AI897379 | CD985672 | CF058698 |
| BP062625 | CB828276 | BI929764 | AI899310 | CD985672 | CF058710 |
| BP062625 | CB828323 | BI929852 | AW738178 | CD985672 | CF058714 |
| BP062625 | CB828455 | BI929852 | BG126081 | CD985672 | CF058808 |
| BP062625 | CB828681 | BI929902 | BI933235 | CD985672 | CF058820 |
| BP062625 | CB829554 | BI929923 | AW034545 | CD985672 | CF058826 |
| BP062639 | CN825649 | BI929939 | BI930216 | CD985672 | CF058834 |
| BP062650 | BP063363 | BI929956 | AW035874 | CD985672 | CF058846 |
| BP062650 | BP066490 | BI930033 | BI932634 | CD985672 | CF058938 |
| BP062650 | BP071152 | BI930061 | BI932571 | CD985672 | CF058996 |
| BP062650 | BP075187 | BI930136 | BI933865 | CD985672 | CF059113 |
| BP062736 | CN825649 | BI930136 | BI935359 | CD985672 | CF059170 |
| BP062739 | BP063363 | BI930205 | AI489351 | CD985683 | CD997076 |
| BP062739 | BP066805 | BI930215 | AI489351 | CD985726 | CD976317 |
| BP062739 | BP071152 | BI930250 | AI485051 | CD985726 | CF052033 |
| BP062739 | BP072651 | BI930250 | AI489351 | CD985726 | CF053803 |
| BP062739 | BP075187 | BI930285 | BI924623 | CD985746 | CD977200 |
| BP062747 | BP064505 | BI930293 | AW621226 | CD985777 | CD997211 |
| BP062747 | BP065449 | BI930304 | AI486854 | CD985916 | CD986275 |
| BP062758 | BP061449 | BI930304 | AI487123 | CD985916 | CD989430 |
| BP062767 | CB826881 | BI930304 | AI771695 | CD985916 | CF043989 |
| BP062767 | CB828834 | BI930304 | AI897184 | CD985933 | CD986275 |
| BP062791 | BP061449 | BI930304 | AI897379 | CD985933 | CD989430 |
| BP062845 | BP062992 | BI930304 | AI897932 | CD985933 | CD997211 |
| BP062845 | BP066448 | BI930364 | BG127344 | CD985933 | CF043989 |
| BP062845 | BP067405 | BI930378 | BG130034 | CD985996 | CD986275 |
| BP062845 | BW596680 | BI930391 | AI489351 | CD985996 | CD989430 |
| BP062976 | BP058671 | BI930426 | AI487856 | CD985996 | CF043989 |
| BP062976 | BP067373 | BI930433 | BG129184 | CD986096 | CF036141 |
| BP062998 | BP063930 | BI930433 | BI924624 | CD986114 | CD988462 |
| BP062998 | BP067405 | BI930444 | BI927016 | CD986166 | CD971401 |
| BP063084 | BP066394 | BI930458 | BG129317 | CD986166 | CD973574 |
| BP063135 | BW599644 | BI930506 | AW928947 | CD986166 | CD973781 |
| BP063149 | BP063410 | BI930559 | BI929655 | CD986166 | CD974955 |
| BP063189 | BP062992 | BI930770 | BE459185 | CD986166 | CD975036 |
| BP063189 | BP066448 | BI930842 | AI489351 | CD986166 | CD975448 |
| BP063189 | BW596680 | BI930895 | AW932562 | CD986166 | CD976821 |
| BP063192 | CB829422 | BI930908 | BI934464 | CD986166 | CD978067 |
| BP063227 | BP058671 | BI930913 | BI924813 | CD986166 | CD985515 |
| BP063227 | BP067373 | BI930950 | BI930850 | CD986166 | CD985792 |
| BP063231 | BP063151 | BI930950 | BI931505 | CD986166 | CD985818 |

|          |          |          |          |          |          |
|----------|----------|----------|----------|----------|----------|
| BP063238 | BP063151 | BI930980 | AW034396 | CD986166 | CD985841 |
| BP063282 | BP063407 | BI930989 | BI935525 | CD986166 | CD985844 |
| BP063282 | BP064324 | BI931044 | BG129317 | CD986166 | CD985911 |
| BP063342 | BP062533 | BI931049 | BI924696 | CD986166 | CD985977 |
| BP063342 | BP063758 | BI931052 | AW624407 | CD986166 | CD985994 |
| BP063353 | CN825649 | BI931074 | BI924623 | CD986166 | CD986082 |
| BP063369 | CB826881 | BI931089 | AI483829 | CD986166 | CD986164 |
| BP063369 | CB828834 | BI931267 | AW934354 | CD986166 | CD986386 |
| BP063382 | CB828834 | BI931278 | AW625874 | CD986166 | CD986533 |
| BP063393 | CB826881 | BI931472 | BI924623 | CD986166 | CD986590 |
| BP063428 | CB827942 | BI931474 | BI931579 | CD986166 | CD986712 |
| BP063428 | CB828117 | BI931480 | AI489351 | CD986166 | CD986781 |
| BP063428 | CB828637 | BI931565 | AW622839 | CD986166 | CD987078 |
| BP063428 | CB829634 | BI931619 | AI487199 | CD986166 | CD987164 |
| BP063451 | CB827652 | BI931619 | AW219301 | CD986166 | CD987299 |
| BP063451 | CB827687 | BI931619 | AW622983 | CD986166 | CD987393 |
| BP063481 | CB828834 | BI931619 | AW649283 | CD986166 | CD987758 |
| BP063486 | BP067405 | BI931619 | AW651024 | CD986166 | CD987801 |
| BP063498 | BP063151 | BI931619 | AW651356 | CD986166 | CD988633 |
| BP063534 | BW599644 | BI931619 | BE353477 | CD986166 | CD989678 |
| BP063548 | BP063930 | BI931619 | BE463029 | CD986166 | CF033655 |
| BP063548 | BP067405 | BI931619 | BE463285 | CD986166 | CF033658 |
| BP063587 | BP066490 | BI931619 | BG123467 | CD986166 | CF033813 |
| BP063587 | BP066805 | BI931619 | BG125151 | CD986166 | CF033985 |
| BP063587 | BP071152 | BI931619 | BG129605 | CD986166 | CF034077 |
| BP063587 | BP072651 | BI931619 | BG134813 | CD986166 | CF034092 |
| BP063616 | BP067405 | BI931619 | BG642624 | CD986166 | CF034126 |
| BP063639 | BP063327 | BI931619 | BG642711 | CD986166 | CF034282 |
| BP063639 | BP064219 | BI931665 | AW217552 | CD986166 | CF034653 |
| BP063639 | BP066697 | BI931665 | BG128007 | CD986168 | CD985555 |
| BP063756 | BP066116 | BI931684 | BI423355 | CD986170 | CD999361 |
| BP063780 | BP063930 | BI931714 | BI926371 | CD986170 | CF060421 |
| BP063780 | BP067405 | BI931753 | BI924623 | CD986237 | CD973199 |
| BP063809 | BW595450 | BI931777 | AW931979 | CD986237 | CF039051 |
| BP063824 | BP067405 | BI931814 | AI486854 | CD986241 | CD978740 |
| BP063875 | BP060018 | BI931814 | AI771695 | CD986304 | CF049481 |
| BP063875 | BP061444 | BI931814 | AI897184 | CD986320 | CF039694 |
| BP063875 | BP066469 | BI931814 | AI899010 | CD986342 | CD978740 |
| BP063876 | CB826881 | BI931827 | BG133618 | CD986349 | CD985555 |
| BP063903 | BP063111 | BI931879 | AI489351 | CD986367 | CD977811 |
| BP063903 | BP063855 | BI931921 | AW622742 | CD986367 | CD978441 |
| BP063903 | BP067274 | BI931921 | AW648800 | CD986453 | CD999420 |
| BP063922 | BP067112 | BI931923 | AW932475 | CD986453 | CF042719 |
| BP064013 | BP063930 | BI931934 | BF051166 | CD986471 | CD978441 |
| BP064013 | BP067405 | BI932013 | AI898808 | CD986496 | CD987496 |
| BP064038 | CB826881 | BI932048 | BI924623 | CD986496 | CD987725 |
| BP064083 | CN825649 | BI932071 | BI925852 | CD986496 | CF055277 |
| BP064101 | BP067405 | BI932085 | AI489351 | CD986499 | CD970352 |
| BP064169 | BP062992 | BI932090 | BI930850 | CD986499 | CD970358 |
| BP064169 | BP066448 | BI932090 | BI931505 | CD986499 | CD970997 |
| BP064169 | BP067405 | BI932302 | BI926371 | CD986499 | CD971401 |
| BP064169 | BW596680 | BI932345 | BI423355 | CD986499 | CD973574 |

|          |          |          |          |          |          |
|----------|----------|----------|----------|----------|----------|
| BP064180 | BP063930 | BI932370 | BI926371 | CD986499 | CD973781 |
| BP064180 | BP067405 | BI932370 | BI926549 | CD986499 | CD974955 |
| BP064196 | BP067238 | BI932391 | BI423355 | CD986499 | CD975036 |
| BP064316 | CB828834 | BI932403 | AW623057 | CD986499 | CD975448 |
| BP064341 | BP063930 | BI932403 | BG131093 | CD986499 | CD976821 |
| BP064341 | BP066448 | BI932403 | BI928422 | CD986499 | CD978067 |
| BP064341 | BP067405 | BI932496 | BI926677 | CD986499 | CD985818 |
| BP064341 | BW596680 | BI932580 | AI489351 | CD986499 | CD985844 |
| BP064343 | CB826881 | BI932646 | AW030445 | CD986499 | CD985911 |
| BP064343 | CB828834 | BI932646 | AW621727 | CD986499 | CD985994 |
| BP064348 | CB826881 | BI932646 | AW647708 | CD986499 | CD986082 |
| BP064348 | CB828834 | BI932646 | AW650714 | CD986499 | CD986164 |
| BP064350 | BP063930 | BI932646 | AW650937 | CD986499 | CD986198 |
| BP064350 | BP067405 | BI932646 | BE462378 | CD986499 | CD986386 |
| BP064359 | BP062533 | BI932646 | BG124541 | CD986499 | CD986533 |
| BP064359 | BP063758 | BI932646 | BG130748 | CD986499 | CD986590 |
| BP064360 | CB829422 | BI932646 | BI422979 | CD986499 | CD986712 |
| BP064467 | CB826881 | BI932646 | BI926746 | CD986499 | CD986781 |
| BP064467 | CB828834 | BI932668 | AI485051 | CD986499 | CD987078 |
| BP064485 | BP062647 | BI932668 | AI489351 | CD986499 | CD987159 |
| BP064491 | BP061449 | BI932738 | AW930723 | CD986499 | CD987164 |
| BP064506 | BP058671 | BI932738 | AW932761 | CD986499 | CD987299 |
| BP064506 | BP064792 | BI932749 | AI771696 | CD986499 | CD987393 |
| BP064506 | BP067373 | BI932781 | BF051002 | CD986499 | CD987801 |
| BP064593 | CB826881 | BI932787 | AW738668 | CD986499 | CD988633 |
| BP064593 | CB828834 | BI932847 | BI932634 | CD986499 | CD989670 |
| BP064613 | CB826881 | BI932850 | AW928960 | CD986499 | CD989678 |
| BP064613 | CB828834 | BI932905 | BI924623 | CD986499 | CF032994 |
| BP064615 | BP058671 | BI932955 | BI932634 | CD986499 | CF033655 |
| BP064631 | BP071096 | BI932959 | AI771528 | CD986499 | CF033658 |
| BP064648 | BI418242 | BI932996 | BG133976 | CD986499 | CF033813 |
| BP064720 | CB826881 | BI933028 | AW217236 | CD986499 | CF034077 |
| BP064720 | CB828834 | BI933068 | AW933860 | CD986499 | CF034092 |
| BP064731 | BW599644 | BI933068 | BE441073 | CD986499 | CF034282 |
| BP064804 | CB826881 | BI933070 | BG124240 | CD986499 | CF034427 |
| BP064807 | CB826881 | BI933070 | BI929332 | CD986499 | CF034653 |
| BP064807 | CB829422 | BI933086 | AI486872 | CD986512 | CD988462 |
| BP064826 | BP062787 | BI933134 | BI924623 | CD986595 | CD987288 |
| BP064853 | BP063151 | BI933199 | AW030518 | CD986611 | CD986275 |
| BP064907 | BP075082 | BI933282 | AI488638 | CD986618 | CD973574 |
| BP064983 | BP063828 | BI933307 | BI932960 | CD986618 | CD974955 |
| BP064987 | BP067405 | BI933358 | AW932475 | CD986618 | CD975036 |
| BP065059 | CB826881 | BI933547 | AI897063 | CD986618 | CD976821 |
| BP065059 | CB828834 | BI933547 | BI930813 | CD986618 | CD985792 |
| BP065121 | CN825649 | BI933601 | AW033339 | CD986618 | CD985818 |
| BP065230 | BP067405 | BI933661 | AI486729 | CD986618 | CD985911 |
| BP065290 | BP062992 | BI933661 | AI487087 | CD986618 | CD985977 |
| BP065290 | BP063930 | BI933661 | AW036659 | CD986618 | CD987164 |
| BP065290 | BP066448 | BI933661 | BE353421 | CD986618 | CD987299 |
| BP065290 | BP067405 | BI933661 | BE462171 | CD986618 | CD987801 |
| BP065290 | BW596680 | BI933661 | BI923765 | CD986618 | CF033655 |
| BP065302 | CN825649 | BI933661 | BI923771 | CD986618 | CF033813 |

|          |          |          |          |          |          |
|----------|----------|----------|----------|----------|----------|
| BP065402 | CB826881 | BI933661 | BI928769 | CD986618 | CF034126 |
| BP065402 | CB828834 | BI933697 | AI489351 | CD986618 | CF034282 |
| BP065468 | BP067405 | BI933903 | AW928474 | CD986679 | CD976496 |
| BP065483 | BP062992 | BI933909 | BE354179 | CD986679 | CD977042 |
| BP065483 | BP066448 | BI933954 | BE450829 | CD986679 | CD977489 |
| BP065483 | BP067405 | BI934082 | BI933279 | CD986679 | CD977961 |
| BP065483 | BW596680 | BI934118 | AW033339 | CD986679 | CD986450 |
| BP065537 | BP058671 | BI934166 | BG124222 | CD986679 | CD987907 |
| BP065537 | BP067373 | BI934166 | BG131232 | CD986679 | CD988060 |
| BP065611 | CN825649 | BI934166 | BI934074 | CD986679 | CD988564 |
| BP065635 | BW599644 | BI934205 | AW455268 | CD986679 | CD996931 |
| BP065665 | BP071096 | BI934205 | AW932184 | CD986679 | CF031823 |
| BP065776 | BP060820 | BI934205 | BG133119 | CD986679 | CF032187 |
| BP065776 | BP065722 | BI934273 | AW933903 | CD986679 | CF032850 |
| BP065792 | CB828834 | BI934294 | AW930070 | CD986679 | CF033279 |
| BP065843 | BP063930 | BI934312 | AW624085 | CD986679 | CF034108 |
| BP065843 | BP067405 | BI934325 | BI931916 | CD986894 | CF044344 |
| BP065891 | BP062476 | BI934330 | AW929564 | CD986957 | CD986275 |
| BP065891 | BP062628 | BI934353 | AI895612 | CD986957 | CD989430 |
| BP065891 | BP063208 | BI934353 | AW220401 | CD986957 | CF043989 |
| BP065891 | BP063327 | BI934377 | BI932127 | CD986961 | CD977200 |
| BP065891 | BP063981 | BI934411 | BE354415 | CD987069 | CD976935 |
| BP065891 | BP064219 | BI934422 | AW621406 | CD987069 | CF035331 |
| BP065891 | BP066697 | BI934454 | BE451212 | CD987075 | CD987288 |
| BP065976 | CB826881 | BI934541 | BE451097 | CD987085 | CD971847 |
| BP065976 | CB828834 | BI934544 | AW738255 | CD987085 | CD972079 |
| BP066007 | CN825649 | BI934569 | AI483380 | CD987085 | CD972628 |
| BP066119 | CB826881 | BI934569 | AI483387 | CD987085 | CD973233 |
| BP066119 | CB828834 | BI934659 | AW932475 | CD987085 | CD973242 |
| BP066170 | BP058671 | BI934703 | AW219754 | CD987085 | CD974450 |
| BP066170 | BP064792 | BI934703 | AW650661 | CD987085 | CD974516 |
| BP066170 | BP067373 | BI934708 | BE451097 | CD987085 | CD975864 |
| BP066188 | CB826881 | BI934785 | AW735906 | CD987085 | CD976073 |
| BP066188 | CB828834 | BI934804 | BI935525 | CD987085 | CD976136 |
| BP066217 | BP063855 | BI934823 | AW934334 | CD987085 | CD977185 |
| BP066267 | BP063717 | BI934869 | BG124815 | CD987085 | CD978046 |
| BP066269 | CB826881 | BI934873 | AI486729 | CD987085 | CD978197 |
| BP066269 | CB828834 | BI934873 | AI487087 | CD987085 | CD978420 |
| BP066270 | BP065709 | BI934873 | AI894882 | CD987085 | CD978627 |
| BP066319 | CN825649 | BI934873 | AW035892 | CD987085 | CD978702 |
| BP066321 | CN825649 | BI934873 | AW623257 | CD987085 | CD978992 |
| BP066369 | CB826881 | BI934873 | BE353421 | CD987085 | CD981528 |
| BP066369 | CB828834 | BI934873 | BI923771 | CD987085 | CD982626 |
| BP066379 | BP063111 | BI934873 | BI928432 | CD987085 | CD982632 |
| BP066379 | BP063855 | BI934873 | BI928769 | CD987085 | CD982857 |
| BP066379 | BP067274 | BI934958 | BE459831 | CD987085 | CD982977 |
| BP066408 | BP063151 | BI934958 | BF050370 | CD987085 | CD983070 |
| BP066487 | BP062536 | BI934958 | BG123141 | CD987085 | CD983341 |
| BP066551 | CB826881 | BI934958 | BG644020 | CD987085 | CD983386 |
| BP066551 | CB828834 | BI934958 | BI929109 | CD987085 | CD985711 |
| BP066573 | CN825649 | BI934984 | AW648087 | CD987085 | CD986249 |
| BP066584 | BP062992 | BI934984 | AW944911 | CD987085 | CD987441 |

|          |          |                   |          |          |          |
|----------|----------|-------------------|----------|----------|----------|
| BP066595 | BP058671 | BI934984          | BG134418 | CD987085 | CD987667 |
| BP066595 | BP064792 | BI934985          | AW033924 | CD987085 | CF028517 |
| BP066595 | BP067373 | BI934999          | BG131728 | CD987085 | CF028528 |
| BP066607 | BP062992 | BI935034          | AI487087 | CD987085 | CF028600 |
| BP066607 | BP066448 | BI935034          | AW934414 | CD987085 | CF028674 |
| BP066607 | BP067405 | BI935034          | BG127303 | CD987085 | CF028690 |
| BP066607 | BW596680 | BI935034          | BI923771 | CD987085 | CF028774 |
| BP066624 | CB826881 | BI935034          | BI930883 | CD987085 | CF028798 |
| BP066624 | CB828834 | BI935148          | AW929073 | CD987085 | CF028810 |
| BP066645 | CB827652 | BI935366          | AW930471 | CD987085 | CF028859 |
| BP066645 | CB827687 | BI935422          | AI489351 | CD987085 | CF028932 |
| BP066645 | CB828169 | BI935433          | BI935525 | CD987085 | CF028955 |
| BP066724 | BP067405 | BI935457          | AW219773 | CD987085 | CF028967 |
| BP066755 | CB826881 | BI935457          | AW622701 | CD987085 | CF029155 |
| BP066755 | CB828834 | BI935457          | AW623530 | CD987085 | CF029210 |
| BP066779 | BP067238 | BI935457          | BE458968 | CD987085 | CF029221 |
| BP066803 | BP062972 | BI935457          | BI931668 | CD987085 | CF029311 |
| BP066808 | BP065433 | BI935457          | BI933544 | CD987085 | CF029369 |
| BP066812 | BP063363 | BI935499          | AW931426 | CD987085 | CF029390 |
| BP066812 | BP066490 | BI935562          | AW735906 | CD987085 | CF029394 |
| BP066812 | BP071152 | BI935568          | BF051166 | CD987085 | CF029414 |
| BP066847 | BP063930 | BI935654          | AI486729 | CD987085 | CF059666 |
| BP066847 | BP067405 | BI935654          | AI487087 | CD987085 | CF059721 |
| BP066854 | BP058671 | BI935654          | AI894882 | CD987085 | CF059852 |
| BP066854 | BP064792 | BI935654          | AW035892 | CD987243 | CD986844 |
| BP066854 | BP067373 | BI935654          | AW623257 | CD987268 | CD977653 |
| BP066883 | AU254058 | BI935654          | BE353421 | CD987268 | CD986844 |
| BP066883 | AW720557 | BI935654          | BI923771 | CD987311 | CD975741 |
| BP066883 | BI419164 | BI935654          | BI928432 | CD987311 | CD980617 |
| BP066883 | BI420929 | BI935654          | BI928769 | CD987311 | CD983705 |
| BP066883 | BP062844 | BI935700          | AW455268 | CD987311 | CD984026 |
| BP066883 | BP063670 | BI935700          | AW932184 | CD987311 | CD984188 |
| BP066883 | BP064312 | BI935756          | BI932899 | CD987311 | CD984717 |
| BP066883 | BP064378 | BI935783          | BE354945 | CD987311 | CD984736 |
| BP066883 | BP064419 | BI935853          | AI894437 | CD987311 | CD988046 |
| BP066883 | BP064778 | BI935885          | BG124763 | CD987311 | CD990634 |
| BP066883 | BP065058 | BI935885          | BI930831 | CD987311 | CD999708 |
| BP066883 | BP065161 | BI936020          | AW031134 | CD987311 | CF032438 |
| BP066883 | BP065827 | <i>Glycine ma</i> | williams | CD987311 | CF032594 |
| BP066883 | BP066165 | EST1              | EST2     | CD987311 | CF032765 |
| BP066883 | CB826861 | AI416498          | AI856288 | CD987311 | CF032895 |
| BP066883 | CB827038 | AI416498          | AI966221 | CD987311 | CF040749 |
| BP066883 | CB827363 | AI416498          | BE804557 | CD987311 | CF054343 |
| BP066883 | CB827388 | AI416498          | BG155456 | CD987411 | CD976958 |
| BP066883 | CB827404 | AI416498          | BG157067 | CD987411 | CF053183 |
| BP066883 | CB827546 | AI416498          | BI941949 | CD987743 | CF040594 |
| BP066883 | CB827649 | AI416498          | CA937697 | CD987880 | CD986844 |
| BP066883 | CB827838 | AI416549          | BG789482 | CD987932 | CD985555 |
| BP066883 | CB827986 | AI416550          | AI460879 | CD987958 | CF036766 |
| BP066883 | CB828044 | AI416939          | BI786492 | CD987958 | CF038468 |
| BP066883 | CB828078 | AI416949          | CA953347 | CD987958 | CF039575 |
| BP066883 | CB828109 | AI437561          | AW597493 | CD988041 | CD985555 |

|          |          |          |          |          |          |
|----------|----------|----------|----------|----------|----------|
| BP066883 | CB828198 | AI437561 | BI972514 | CD988208 | CF039267 |
| BP066883 | CB828234 | AI437647 | BE473548 | CD988481 | CF035265 |
| BP066883 | CB828455 | AI437657 | BM093617 | CD988488 | CD987288 |
| BP066883 | CB828681 | AI437752 | CA819075 | CD988542 | CF059330 |
| BP066883 | CB829554 | AI437758 | BE609384 | CD988736 | CD990229 |
| BP066902 | CB826881 | AI437758 | BI320434 | CD988785 | CF039646 |
| BP066902 | CB828834 | AI437792 | AI460872 | CD988930 | CF040650 |
| BP066913 | BP062992 | AI437805 | AI736972 | CD988930 | CF041562 |
| BP066913 | BP066448 | AI437845 | AW704609 | CD988962 | CF036304 |
| BP066913 | BP067405 | AI437852 | AI736604 | CD989213 | CF054188 |
| BP066913 | BW596680 | AI437852 | AI901200 | CD989231 | CD986633 |
| BP066917 | BP058671 | AI437854 | BF424324 | CD989335 | CD989805 |
| BP066917 | BP064792 | AI437884 | BG790537 | CD989662 | CD971906 |
| BP066917 | BP067373 | AI437884 | BI316303 | CD989662 | CD973438 |
| BP066934 | BP058671 | AI437884 | CB063526 | CD989730 | CD971906 |
| BP066934 | BP064792 | AI437916 | AI495116 | CD989739 | CD971906 |
| BP066934 | BP067373 | AI440583 | BM094734 | CD989745 | CF029756 |
| BP066956 | CB826881 | AI440593 | BM885729 | CD989795 | CD987288 |
| BP066966 | BW599644 | AI440688 | AW760925 | CD989913 | CF050758 |
| BP066975 | AW720557 | AI440715 | AW186058 | CD989950 | CD976898 |
| BP066975 | BI419164 | AI440810 | BM094734 | CD990546 | CF038187 |
| BP066975 | BI420929 | AI440826 | AW350860 | CD990555 | CF054151 |
| BP066975 | BP062844 | AI440826 | AW705459 | CD990555 | CF055674 |
| BP066975 | BP062919 | AI440915 | BM094734 | CD990700 | CD990761 |
| BP066975 | BP063670 | AI441033 | BF424324 | CD990700 | CF054151 |
| BP066975 | BP064352 | AI441093 | AI443530 | CD990715 | CD990761 |
| BP066975 | BP064378 | AI441093 | AW568766 | CD990715 | CF054151 |
| BP066975 | BP064419 | AI441102 | AI443234 | CD990719 | CD998045 |
| BP066975 | BP064778 | AI441132 | AI494831 | CD990719 | CF021642 |
| BP066975 | BP065058 | AI441170 | BM732780 | CD990719 | CF021645 |
| BP066975 | BP065161 | AI441189 | AI988329 | CD990719 | CF031600 |
| BP066975 | BP065827 | AI441272 | BM094734 | CD990719 | CF034958 |
| BP066975 | BP066165 | AI441398 | AI496396 | CD990719 | CF035070 |
| BP066975 | CB826861 | AI441398 | AI901200 | CD990719 | CF040331 |
| BP066975 | CB827038 | AI441447 | AI794753 | CD990719 | CF041142 |
| BP066975 | CB827363 | AI441457 | AW756933 | CD990719 | CF042600 |
| BP066975 | CB827388 | AI441457 | BI974262 | CD990719 | CF045363 |
| BP066975 | CB827404 | AI441466 | BM954118 | CD990719 | CF049938 |
| BP066975 | CB827546 | AI441487 | AI736604 | CD990719 | CF052413 |
| BP066975 | CB827649 | AI441612 | BI786555 | CD990719 | CF057043 |
| BP066975 | CB827838 | AI441642 | BI316576 | CD990736 | CD998045 |
| BP066975 | CB827986 | AI441665 | BF070635 | CD990736 | CF021642 |
| BP066975 | CB828044 | AI441681 | AW185446 | CD990736 | CF031600 |
| BP066975 | CB828078 | AI441681 | BG881591 | CD990736 | CF035070 |
| BP066975 | CB828109 | AI441714 | AI441281 | CD990736 | CF039267 |
| BP066975 | CB828198 | AI441714 | BF324250 | CD990736 | CF040331 |
| BP066975 | CB828234 | AI441714 | BI943813 | CD990736 | CF040643 |
| BP066975 | CB828455 | AI441714 | BM095020 | CD990736 | CF041142 |
| BP066975 | CB828681 | AI441714 | BM954931 | CD990736 | CF042600 |
| BP066975 | CB829554 | AI442013 | AW570504 | CD990736 | CF042859 |
| BP067019 | CB826881 | AI442043 | BG882363 | CD990736 | CF052413 |
| BP067019 | CB828834 | AI442050 | AW132675 | CD990736 | CF057043 |

|          |          |          |          |          |          |
|----------|----------|----------|----------|----------|----------|
| BP067064 | CN825649 | AI442050 | AW277525 | CD990786 | CF059478 |
| BP067087 | CB828834 | AI442050 | AW317804 | CD990786 | CF060290 |
| BP067088 | BP067405 | AI442050 | AW759048 | CD996233 | CD996422 |
| BP067151 | CB826881 | AI442050 | BM085003 | CD996233 | CD996573 |
| BP067151 | CB828834 | AI442151 | BI785117 | CD996233 | CD996596 |
| BP067203 | CB829091 | AI442394 | AW201242 | CD996233 | CD996836 |
| BP067204 | BP063720 | AI442426 | AI736604 | CD996233 | CD996837 |
| BP067204 | BP064842 | AI442440 | AI461224 | CD996233 | CD997072 |
| BP067204 | BP066766 | AI442449 | BI974368 | CD996305 | CD996422 |
| BP067204 | BP067305 | AI442603 | AW099698 | CD996305 | CD996715 |
| BP067215 | CB826881 | AI442603 | AW760120 | CD996305 | CD996836 |
| BP067215 | CB828834 | AI442603 | BF010248 | CD996305 | CD997072 |
| BP067216 | AW720557 | AI442603 | BF070483 | CD996331 | CD996573 |
| BP067216 | BI417317 | AI442603 | BF424375 | CD996331 | CD996596 |
| BP067216 | BI417446 | AI442603 | BM893138 | CD996331 | CD996836 |
| BP067216 | BI418135 | AI442632 | AI495021 | CD996331 | CD996837 |
| BP067216 | BI418136 | AI442632 | BE475280 | CD996331 | CD997072 |
| BP067216 | BI418453 | AI442661 | BM094734 | CD996390 | CD996422 |
| BP067216 | BI418923 | AI442690 | AI437973 | CD996390 | CD996868 |
| BP067216 | BI418992 | AI442690 | BG316079 | CD996534 | CD996422 |
| BP067216 | BI419164 | AI442756 | BM094503 | CD996534 | CD996573 |
| BP067216 | BI419752 | AI442759 | AI443530 | CD996534 | CD996596 |
| BP067216 | BI420929 | AI442759 | AW279404 | CD996534 | CD996715 |
| BP067216 | BP059040 | AI442759 | AW568766 | CD996534 | CD996836 |
| BP067216 | BP062601 | AI442761 | BG237018 | CD996534 | CD997072 |
| BP067216 | BP062762 | AI443062 | BI787520 | CD996662 | CD996422 |
| BP067216 | BP063555 | AI443152 | AW596008 | CD996662 | CD996573 |
| BP067216 | BP063645 | AI443163 | AI495703 | CD996662 | CD996596 |
| BP067216 | BP063670 | AI443211 | AI736604 | CD996662 | CD996836 |
| BP067216 | BP064009 | AI443256 | AI441019 | CD996662 | CD996837 |
| BP067216 | BP064181 | AI443289 | CA953489 | CD996662 | CD997072 |
| BP067216 | BP064378 | AI443373 | AW760925 | CD996765 | CD996715 |
| BP067216 | BP064538 | AI443377 | AW101691 | CD996765 | CD996836 |
| BP067216 | BP064684 | AI443460 | AI494797 | CD996765 | CD997072 |
| BP067216 | BP064778 | AI443460 | AI495703 | CD996865 | CD996422 |
| BP067216 | BP064830 | AI443673 | AW459931 | CD996865 | CD996596 |
| BP067216 | BP064937 | AI443710 | AW757157 | CD996865 | CD996837 |
| BP067216 | BP065058 | AI443759 | AI443264 | CD996865 | CD997072 |
| BP067216 | BP065161 | AI443767 | AI938356 | CD996885 | CF045250 |
| BP067216 | BP065365 | AI443767 | AW200763 | CD996885 | CF045321 |
| BP067216 | BP065751 | AI443767 | AW202229 | CD996891 | CF033614 |
| BP067216 | BP066165 | AI443767 | AW309054 | CD996891 | CF040499 |
| BP067216 | BP066496 | AI443767 | AW310784 | CD996891 | CF041845 |
| BP067216 | BP066974 | AI443767 | AW396556 | CD996910 | CD990761 |
| BP067216 | BP067337 | AI443767 | AW704904 | CD996910 | CF054151 |
| BP067216 | BP067372 | AI443767 | AW705391 | CD996935 | CD986208 |
| BP067216 | BP068270 | AI443767 | BM885323 | CD996982 | CD997219 |
| BP067216 | CB826861 | AI443857 | CA953216 | CD996982 | CD997226 |
| BP067216 | CB826969 | AI443857 | CA953339 | CD996992 | CF054151 |
| BP067216 | CB827363 | AI443871 | BI973152 | CD996995 | CD998758 |
| BP067216 | CB827404 | AI443913 | BG237978 | CD996996 | CD999361 |
| BP067216 | CB827516 | AI443950 | BE475197 | CD996996 | CF060421 |

|          |          |          |          |          |          |
|----------|----------|----------|----------|----------|----------|
| BP067216 | CB827546 | AI443993 | AI442897 | CD997075 | CD986208 |
| BP067216 | CB827649 | AI443993 | AI496509 | CD997103 | CD975901 |
| BP067216 | CB827673 | AI443993 | BE347046 | CD997103 | CD976248 |
| BP067216 | CB827838 | AI460455 | AI461043 | CD997103 | CD977309 |
| BP067216 | CB828078 | AI460527 | AW201242 | CD997103 | CD977404 |
| BP067216 | CB828109 | AI460535 | BI786555 | CD997103 | CD978114 |
| BP067216 | CB828190 | AI460546 | BM732780 | CD997103 | CD978632 |
| BP067216 | CB828198 | AI460602 | BM885238 | CD997103 | CD979148 |
| BP067216 | CB828234 | AI460609 | AI495703 | CD997103 | CD997185 |
| BP067216 | CB828257 | AI460705 | CA953049 | CD997103 | CD997262 |
| BP067216 | CB828323 | AI460708 | AW756933 | CD997103 | CD997273 |
| BP067216 | CB828521 | AI460726 | AI443733 | CD997103 | CD997276 |
| BP067216 | CB828681 | AI460726 | AI494797 | CD997103 | CD997311 |
| BP067216 | CB829227 | AI460805 | BI787691 | CD997103 | CD997545 |
| BP067216 | CB829499 | AI460968 | BM892192 | CD997103 | CF038013 |
| BP067216 | CB829554 | AI460989 | BM731808 | CD997105 | CF051192 |
| BP067252 | BP063930 | AI461021 | AW756933 | CD997207 | CD975901 |
| BP067252 | BP067405 | AI461211 | BG882833 | CD997207 | CD976248 |
| BP067270 | CB826881 | AI461240 | BI943829 | CD997207 | CD976667 |
| BP067272 | BP066035 | AI494714 | AI443895 | CD997207 | CD977309 |
| BP067276 | BP061449 | AI494918 | BE475532 | CD997207 | CD977404 |
| BP067331 | BP065994 | AI494918 | BF595064 | CD997207 | CD978114 |
| BP067346 | CN825649 | AI494948 | BM094734 | CD997207 | CD979148 |
| BP067348 | BP063930 | AI494951 | AI901200 | CD997207 | CF038013 |
| BP067348 | BP067405 | AI494979 | AI442897 | CD997229 | CF060421 |
| BP067382 | BP067405 | AI494979 | BE347046 | CD997243 | CF036304 |
| BP067592 | BP067953 | AI495010 | AW756933 | CD997306 | CD996422 |
| BP067592 | BP068083 | AI495010 | CA953347 | CD997306 | CD996573 |
| BP067758 | BP061449 | AI495060 | AI737009 | CD997306 | CD996715 |
| BP067816 | BW596109 | AI495086 | BM094634 | CD997306 | CD996836 |
| BP067954 | BP071003 | AI495118 | BI972504 | CD997306 | CD996837 |
| BP067963 | BP061192 | AI495183 | AW596008 | CD997306 | CD997072 |
| BP068037 | BP062999 | AI495329 | AW277739 | CD997329 | CD996422 |
| BP068241 | BW596129 | AI495354 | AI442333 | CD997329 | CD996573 |
| BP068536 | BP063151 | AI495354 | AI460978 | CD997329 | CD996596 |
| BP068920 | BW598661 | AI495354 | AI494670 | CD997329 | CD996837 |
| BP069175 | BP067405 | AI495354 | AI496241 | CD997329 | CD997072 |
| BP069201 | BP067405 | AI495354 | BF009438 | CD997362 | CD980185 |
| BP069334 | BW599644 | AI495354 | BI424290 | CD997405 | CD996422 |
| BP069342 | BP062992 | AI495428 | AW704609 | CD997405 | CD996573 |
| BP069342 | BP066448 | AI495435 | BI787520 | CD997405 | CD996836 |
| BP069342 | BW596680 | AI495442 | AW186393 | CD997405 | CD996837 |
| BP069506 | BW626925 | AI495556 | AI736061 | CD997405 | CD997072 |
| BP069621 | BP071096 | AI495576 | AI443985 | CD997424 | CD996596 |
| BP069697 | BP067963 | AI495576 | BF425219 | CD997424 | CD996837 |
| BP069697 | BP072474 | AI495586 | BF425989 | CD997424 | CD997072 |
| BP069706 | BP061905 | AI495635 | BF424778 | CD997448 | CD990761 |
| BP069760 | BP074691 | AI495752 | AW348731 | CD997448 | CF054151 |
| BP069919 | BP063151 | AI495833 | AI441952 | CD997448 | CF055674 |
| BP070015 | BP069925 | AI495833 | AI442534 | CD997624 | CF040860 |
| BP070015 | BP071902 | AI495833 | AW202056 | CD997624 | CF041871 |
| BP070078 | BP065485 | AI495833 | BF068931 | CD997774 | CD990761 |



|          |          |          |          |          |          |
|----------|----------|----------|----------|----------|----------|
| BP070244 | BP062547 | AI495833 | BM885472 | CD997774 | CF054151 |
| BP070244 | BP065178 | AI495833 | CB063634 | CD997795 | CD990776 |
| BP070244 | BP066648 | AI496016 | BG882625 | CD997933 | CD990761 |
| BP070290 | BP065485 | AI496110 | AW348731 | CD997933 | CF054151 |
| BP070605 | BP059585 | AI496143 | BI787520 | CD998116 | CF040860 |
| BP070605 | BP071164 | AI496204 | CA952934 | CD998160 | CD998045 |
| BP070605 | BP074187 | AI496242 | BI787691 | CD998160 | CF021642 |
| BP070605 | CN825549 | AI496283 | BG881608 | CD998160 | CF031600 |
| BP070634 | BP065485 | AI496357 | BF009312 | CD998160 | CF035070 |
| BP070771 | BW599644 | AI496428 | BF070153 | CD998160 | CF037917 |
| BP070790 | BW598661 | AI496496 | BI787520 | CD998160 | CF040331 |
| BP070829 | BP064900 | AI496644 | BM885223 | CD998160 | CF042600 |
| BP071021 | BI418386 | AI507842 | BI787691 | CD998160 | CF042859 |
| BP071021 | BP069289 | AI522834 | AI736469 | CD998160 | CF049938 |
| BP071155 | CB827548 | AI522834 | AW102139 | CD998239 | CF054151 |
| BP071335 | BP071087 | AI522834 | AW185430 | CD998239 | CF055674 |
| BP071336 | BP064279 | AI522834 | AW306943 | CD998280 | CD990515 |
| BP071531 | BP063151 | AI522834 | BI321164 | CD998280 | CD990674 |
| BP071549 | BP067405 | AI522925 | AI495703 | CD998280 | CD998281 |
| BP071711 | BI418459 | AI522976 | AI900477 | CD998280 | CD999875 |
| BP071888 | BW598661 | AI735801 | AW318141 | CD998280 | CF021660 |
| BP072115 | BP063151 | AI735812 | AI735945 | CD998291 | CD998292 |
| BP072157 | BW598661 | AI735812 | AW318141 | CD998291 | CD998473 |
| BP072401 | BP071096 | AI735825 | AI735945 | CD998291 | CD998737 |
| BP072471 | BP070966 | AI735825 | AW318141 | CD998291 | CD998744 |
| BP072474 | BP061192 | AI735836 | AI735945 | CD998291 | CD998756 |
| BP072492 | BI418242 | AI735836 | AW318141 | CD998343 | CD990633 |
| BP072515 | BP063151 | AI735847 | AI735945 | CD998429 | CD998430 |
| BP072534 | BP063151 | AI735953 | AW397445 | CD998450 | CD989652 |
| BP072596 | BP065936 | AI735959 | AW318141 | CD998450 | CD989830 |
| BP072598 | CB828469 | AI735997 | AW318141 | CD998472 | CD998473 |
| BP072640 | BP063151 | AI736019 | AI735945 | CD998472 | CD998737 |
| BP072649 | BW598661 | AI736019 | AW318141 | CD998472 | CD998744 |
| BP072722 | CB826881 | AI736090 | AW397445 | CD998500 | CD997533 |
| BP072722 | CB828834 | AI736118 | AI960885 | CD998517 | CF059309 |
| BP072736 | BP063151 | AI736118 | AW348846 | CD998518 | CF058619 |
| BP072782 | BI418386 | AI736118 | BG237566 | CD998518 | CF059309 |
| BP072782 | BP073475 | AI736173 | BM885409 | CD998563 | CD990635 |
| BP073158 | BP062999 | AI736361 | BM892491 | CD998683 | CD990761 |
| BP073396 | BP071902 | AI736369 | AW306921 | CD998683 | CF054151 |
| BP073429 | BP066951 | AI736369 | AW307304 | CD998716 | CF045363 |
| BP073464 | BP067963 | AI736369 | BE474757 | CD998773 | CD968420 |
| BP073464 | BP072474 | AI736369 | BI316549 | CD998773 | CD968428 |
| BP073495 | BP063151 | AI736369 | BI972652 | CD998773 | CD968459 |
| BP073496 | BP059818 | AI736552 | BM732780 | CD998773 | CD968708 |
| BP073503 | BP067607 | AI736598 | BG882449 | CD998773 | CD968872 |
| BP073689 | BP061978 | AI736710 | AW317827 | CD998773 | CD969108 |
| BP073689 | BP068975 | AI736735 | CB063702 | CD998773 | CD969178 |
| BP073689 | BP069907 | AI736774 | AI440637 | CD998773 | CD969412 |
| BP073723 | BP064279 | AI736774 | BM731491 | CD998773 | CD969558 |
| BP074018 | BP062992 | AI736860 | BI974397 | CD998773 | CD969695 |
| BP074018 | BP063930 | AI736881 | BF010439 | CD998773 | CD969844 |

|          |          |          |          |          |          |
|----------|----------|----------|----------|----------|----------|
| BP074018 | BP066448 | AI736897 | BF424897 | CD998773 | CD969868 |
| BP074018 | BP067405 | AI736918 | BM892192 | CD998773 | CD969903 |
| BP074018 | BW596680 | AI736992 | AI736908 | CD998773 | CD982666 |
| BP074092 | BI418386 | AI736992 | AI901115 | CD998773 | CD982669 |
| BP074092 | BP069289 | AI736992 | AW620614 | CD998773 | CD982872 |
| BP074092 | BP073475 | AI736992 | AW734611 | CD998773 | CD999248 |
| BP074181 | BP059333 | AI736992 | BF424133 | CD998777 | CD972629 |
| BP074181 | BP061507 | AI736992 | BF596077 | CD998777 | CD973607 |
| BP074181 | BP064995 | AI736992 | BI942031 | CD998777 | CD974429 |
| BP074181 | BP070868 | AI736992 | BM731724 | CD998777 | CD974729 |
| BP074181 | BP071941 | AI736992 | BM955073 | CD998777 | CD974788 |
| BP074285 | AW720235 | AI736994 | BG316158 | CD998777 | CD974905 |
| BP074285 | BW623088 | AI736994 | BM892192 | CD998777 | CD975126 |
| BP074285 | BW624069 | AI736994 | CA953216 | CD998777 | CD997588 |
| BP074285 | BW625056 | AI737003 | BG882363 | CD998777 | CF039413 |
| BP074285 | BW626246 | AI737014 | AI959980 | CD998777 | CF040700 |
| BP074285 | BW626580 | AI737014 | AI966249 | CD998777 | CF042035 |
| BP074285 | BW627420 | AI748019 | AI735945 | CD998777 | CF042456 |
| BP074285 | BW627857 | AI748019 | AW318141 | CD998777 | CF047765 |
| BP074285 | BW628365 | AI748194 | AW318141 | CD998777 | CF049536 |
| BP074285 | BW629747 | AI748234 | AW397445 | CD998777 | CF051805 |
| BP074285 | BW629958 | AI748240 | AW397445 | CD998777 | CF053128 |
| BP074285 | BW632865 | AI748282 | AW318141 | CD998777 | CF054039 |
| BP074285 | CB827247 | AI748647 | AW397445 | CD998777 | CF057123 |
| BP074285 | CB829655 | AI748656 | AI735945 | CD998796 | CF047974 |
| BP074475 | CB826881 | AI748656 | AW318141 | CD998813 | CD988462 |
| BP074475 | CB828834 | AI748700 | AI735945 | CD998813 | CD990625 |
| BP074716 | BW599644 | AI748716 | BM885238 | CD998813 | CD990687 |
| BP074809 | BP063151 | AI748747 | AW397445 | CD998878 | CD999529 |
| BP075126 | BP066490 | AI748752 | AW397445 | CD998916 | CD984684 |
| BP075126 | BP071152 | AI759623 | AI735945 | CD998985 | CF021592 |
| BP075126 | BP072591 | AI759623 | AW318141 | CD998999 | CF034724 |
| BP075186 | BP066490 | AI759675 | AW318141 | CD999141 | CD984242 |
| BP075186 | BP071152 | AI794769 | AW760120 | CD999272 | CD983887 |
| BP075186 | BP075187 | AI794769 | CA952957 | CD999272 | CD984319 |
| BP075848 | CB826881 | AI794839 | AW318141 | CD999272 | CD999273 |
| BP075848 | CB828834 | AI794969 | AI735945 | CD999408 | CD999409 |
| BU494155 | BW597857 | AI794969 | AW318141 | CD999414 | CD999415 |
| BU494234 | BW597520 | AI795019 | AW318141 | CD999419 | CF042719 |
| BU494284 | BW596388 | AI855437 | BM093318 | CD999441 | CF040331 |
| BU494284 | BW597072 | AI855452 | BM892192 | CD999442 | CF040331 |
| BU494296 | CB829296 | AI855466 | BG882625 | CD999456 | CD980185 |
| BU494359 | BP061167 | AI855466 | BI786492 | CD999483 | CF047446 |
| BU494425 | CB826881 | AI855474 | BM892192 | CD999532 | CD989398 |
| BU494425 | CB828834 | AI855474 | CA953216 | CD999592 | CF041205 |
| BU494470 | BW596388 | AI855474 | CA953339 | CD999592 | CF056147 |
| BU494470 | BW597072 | AI855477 | BM893263 | CD999723 | CD990705 |
| BW594354 | BG662402 | AI855491 | BE473417 | CD999737 | CF040594 |
| BW594366 | BW596297 | AI855491 | BG156544 | CD999765 | CD971355 |
| BW594366 | BW599748 | AI855500 | BM892192 | CD999790 | CD999791 |
| BW594366 | BW600068 | AI855500 | CA953216 | CD999832 | CD999833 |
| BW594371 | BW596388 | AI855500 | CA953339 | CF021580 | CD998045 |

|          |          |          |          |          |          |
|----------|----------|----------|----------|----------|----------|
| BW594371 | BW597072 | AI855504 | BG316158 | CF021580 | CF031600 |
| BW594379 | CB826865 | AI855514 | BM892192 | CF021580 | CF035070 |
| BW594392 | CB829296 | AI855514 | CA953216 | CF021580 | CF037917 |
| BW594416 | BG662203 | AI855520 | BG316158 | CF021580 | CF040331 |
| BW594428 | BP063953 | AI855520 | BM892192 | CF021580 | CF040643 |
| BW594430 | BW596388 | AI855520 | CA953216 | CF021580 | CF041142 |
| BW594430 | BW597072 | AI855546 | BG316158 | CF021580 | CF042859 |
| BW594454 | BW596297 | AI855546 | BM892192 | CF021580 | CF049938 |
| BW594454 | BW599748 | AI855546 | CA953216 | CF021580 | CF052413 |
| BW594454 | BW600068 | AI855551 | BG316158 | CF021580 | CF057043 |
| BW594467 | BW596388 | AI855551 | BM892192 | CF021584 | CD997528 |
| BW594467 | BW597072 | AI855551 | CA953216 | CF021584 | CD998045 |
| BW594495 | BW597072 | AI855551 | CA953339 | CF021584 | CF021642 |
| BW594502 | BW598661 | AI855638 | AW569318 | CF021584 | CF021906 |
| BW594523 | BP074276 | AI855684 | BM892192 | CF021584 | CF031600 |
| BW594545 | CB826865 | AI855724 | BM892192 | CF021584 | CF034958 |
| BW594569 | BW596388 | AI855727 | AI938201 | CF021584 | CF035070 |
| BW594569 | BW597072 | AI855737 | BG316158 | CF021584 | CF037917 |
| BW594588 | AI967787 | AI855737 | BM892192 | CF021584 | CF040331 |
| BW594588 | BW595705 | AI855737 | CA953216 | CF021584 | CF042600 |
| BW594602 | BP062647 | AI855970 | CA819043 | CF021584 | CF042859 |
| BW594609 | BW596388 | AI856108 | AI960073 | CF021584 | CF045363 |
| BW594609 | BW597072 | AI856108 | AI966221 | CF021584 | CF049938 |
| BW594614 | BW596388 | AI856108 | BE610450 | CF021584 | CF052413 |
| BW594614 | BW597072 | AI856108 | BE804557 | CF021584 | CF057043 |
| BW594647 | BW596388 | AI856108 | BF426095 | CF021617 | CD998790 |
| BW594647 | BW597072 | AI856108 | BG155152 | CF021723 | CD990761 |
| BW594648 | BW596388 | AI856108 | BG237075 | CF021723 | CF054151 |
| BW594648 | BW597072 | AI856108 | CA802377 | CF021764 | CF040860 |
| BW594663 | BU494219 | AI856204 | BG157462 | CF021764 | CF041871 |
| BW594681 | AI967761 | AI856246 | AI856288 | CF028429 | CF028966 |
| BW594681 | AU252030 | AI856246 | AI856420 | CF028429 | CF028970 |
| BW594681 | BI420012 | AI856246 | AI966221 | CF028513 | CF029001 |
| BW594681 | BU494468 | AI856246 | BE804557 | CF028513 | CF029349 |
| BW594681 | BW595870 | AI856246 | BF426095 | CF028549 | CX129530 |
| BW594681 | BW598747 | AI856246 | BG155456 | CF028582 | CF029001 |
| BW594681 | CN825473 | AI856246 | BG157067 | CF028582 | CF029118 |
| BW594684 | CB826865 | AI856246 | BI941949 | CF028582 | CF029349 |
| BW594699 | BW626925 | AI856246 | CA937697 | CF028593 | CF029011 |
| BW594730 | BI418510 | AI856428 | AW348358 | CF028593 | CF029120 |
| BW594781 | BP062479 | AI856560 | BE806978 | CF028623 | CF028966 |
| BW594784 | BF177880 | AI856560 | BG237480 | CF028623 | CF028970 |
| BW594792 | BW596388 | AI856673 | BG881461 | CF028649 | CF028966 |
| BW594792 | BW597072 | AI856727 | AW396453 | CF028649 | CF028970 |
| BW594798 | BW596388 | AI856727 | BG157497 | CF028678 | CF029117 |
| BW594798 | BW597072 | AI856767 | AW620801 | CF028678 | CF029424 |
| BW594818 | BP068849 | AI856815 | AW397445 | CF028696 | CF028688 |
| BW594876 | BW596388 | AI899932 | BM893493 | CF028696 | CF029011 |
| BW594876 | BW597072 | AI899937 | AI736604 | CF028696 | CF029120 |
| BW594880 | BW596388 | AI899969 | AI495116 | CF028698 | CF028966 |
| BW594880 | BW597072 | AI900106 | BM954118 | CF028698 | CF028970 |
| BW594889 | BW596388 | AI900159 | BG881461 | CF028741 | CF029117 |

|          |          |          |          |          |          |
|----------|----------|----------|----------|----------|----------|
| BW594889 | BW597072 | AI900173 | AI442755 | CF028741 | CF029362 |
| BW594890 | AW163977 | AI900173 | BF424874 | CF028741 | CF029382 |
| BW594890 | BI418659 | AI900179 | AW101691 | CF028741 | CF029415 |
| BW594890 | BI419869 | AI900183 | AI496396 | CF028741 | CF029424 |
| BW594890 | BI420385 | AI900243 | BG789482 | CF028765 | CX129530 |
| BW594890 | BI420661 | AI900272 | BG316158 | CF028766 | CF029011 |
| BW594890 | BW597273 | AI900272 | BM892192 | CF028766 | CF029120 |
| BW594890 | BW597729 | AI900272 | CA953216 | CF028767 | CF029001 |
| BW594890 | BW598185 | AI900314 | AI736604 | CF028767 | CF029118 |
| BW594890 | BW622474 | AI900316 | CA953467 | CF028767 | CF029349 |
| BW594890 | BW623526 | AI900341 | AI496396 | CF028767 | CF029430 |
| BW594890 | BW626036 | AI900341 | AI736604 | CF028816 | CF028966 |
| BW594890 | BW626681 | AI900341 | AI901200 | CF028816 | CF028970 |
| BW594890 | BW627018 | AI900352 | BE347468 | CF028827 | CD988911 |
| BW594890 | BW627302 | AI900413 | BG789482 | CF028827 | CD988941 |
| BW594890 | BW633096 | AI900433 | AW596895 | CF028827 | CD988969 |
| BW594890 | CB827489 | AI900433 | BE807498 | CF028827 | CD989016 |
| BW594890 | CB829076 | AI900459 | BM892192 | CF028827 | CD989608 |
| BW594939 | BW596388 | AI900459 | CA953216 | CF028827 | CF029181 |
| BW594939 | BW597072 | AI900459 | CA953339 | CF028827 | CF029384 |
| BW594953 | BW595178 | AI900586 | CA953216 | CF028827 | CF030286 |
| BW594955 | CB829296 | AI900586 | CA953339 | CF028838 | CD989500 |
| BW594999 | BW596388 | AI900593 | CA953216 | CF028838 | CF029473 |
| BW594999 | BW597072 | AI900593 | CA953339 | CF028838 | CF034312 |
| BW595025 | BU494375 | AI900609 | AW831699 | CF028838 | CF034346 |
| BW595043 | BW598710 | AI900614 | AW277739 | CF028838 | CF034381 |
| BW595128 | CB829296 | AI900651 | AW133028 | CF028839 | CF028688 |
| BW595233 | CB829296 | AI900651 | AW278661 | CF028839 | CF029011 |
| BW595238 | BW596388 | AI900651 | BE331289 | CF028839 | CF029120 |
| BW595238 | BW597072 | AI900651 | BM892774 | CF028839 | CF029325 |
| BW595306 | CB826865 | AI900652 | AW596008 | CF028953 | CX129530 |
| BW595329 | BW597072 | AI900725 | BG238673 | CF029067 | CX129530 |
| BW595340 | BW595178 | AI900733 | BM892290 | CF029195 | CX129530 |
| BW595340 | BW597704 | AI900747 | BM893263 | CF029284 | CX129530 |
| BW595342 | CB827777 | AI900763 | BM892192 | CF029343 | CX129530 |
| BW595345 | BU494126 | AI900926 | BG316158 | CF029344 | CX129530 |
| BW595345 | CN825809 | AI900926 | BM892192 | CF029488 | CF029985 |
| BW595386 | BW596388 | AI900926 | CA953216 | CF029488 | CF030824 |
| BW595386 | BW597072 | AI900952 | BG316158 | CF029488 | CF031169 |
| BW595388 | CB829296 | AI900959 | BG043351 | CF029493 | CD985555 |
| BW595424 | BW596388 | AI900966 | AI496479 | CF029539 | CF030129 |
| BW595424 | BW597072 | AI900966 | AI522888 | CF029539 | CF030242 |
| BW595460 | BW597857 | AI900966 | AI901220 | CF029539 | CF030309 |
| BW595484 | BW595975 | AI900966 | AW101643 | CF029539 | CF030310 |
| BW595488 | BW596388 | AI900966 | AW704938 | CF029539 | CF030556 |
| BW595488 | BW597072 | AI900966 | BE475101 | CF029539 | CF030646 |
| BW595552 | BW596388 | AI900966 | BF009566 | CF029539 | CF030768 |
| BW595552 | BW597072 | AI900966 | BF070220 | CF029539 | CF030833 |
| BW595619 | CB827752 | AI900966 | BG154935 | CF029539 | CF030995 |
| BW595652 | BW596388 | AI900966 | BG238165 | CF029539 | CF031152 |
| BW595652 | BW597072 | AI900966 | BG882826 | CF029539 | CF031156 |
| BW595709 | BW597072 | AI900966 | BM085239 | CF029539 | CF031232 |

|          |          |          |          |          |          |
|----------|----------|----------|----------|----------|----------|
| BW595758 | AW720221 | AI900974 | BE609267 | CF029539 | CF031243 |
| BW595766 | BW598710 | AI901019 | BM893263 | CF029539 | CF031311 |
| BW595772 | BW622142 | AI901026 | BM893263 | CF029637 | CD981691 |
| BW595772 | BW623456 | AI901098 | BG882363 | CF029637 | CD988020 |
| BW595772 | BW623474 | AI901138 | CA953216 | CF029637 | CF030064 |
| BW595772 | BW623715 | AI901138 | CA953339 | CF029637 | CF030069 |
| BW595772 | BW629559 | AI901145 | AW759909 | CF029637 | CF031127 |
| BW595772 | BW629568 | AI901149 | BG316158 | CF029638 | CF029774 |
| BW595772 | BW632290 | AI901149 | BM892192 | CF029638 | CF029977 |
| BW595807 | BW598661 | AI901149 | CA953216 | CF029638 | CF030417 |
| BW595810 | BW597308 | AI901183 | BM892192 | CF029638 | CF030575 |
| BW595825 | BI418765 | AI901190 | BM885271 | CF029651 | CD985555 |
| BW595838 | BW596388 | AI901245 | CA953216 | CF029764 | CD989805 |
| BW595838 | BW597072 | AI901245 | CA953339 | CF029796 | CD998416 |
| BW595869 | BW598710 | AI930606 | BM954956 | CF029796 | CD998417 |
| BW595892 | BW621354 | AI930673 | BG316158 | CF029796 | CF028968 |
| BW595904 | AW164078 | AI930673 | BM892192 | CF029796 | CF031758 |
| BW595904 | AW720644 | AI930673 | CA953216 | CF029801 | CD989442 |
| BW595904 | BE122535 | AI930679 | BM892192 | CF029810 | CF059131 |
| BW595904 | BW595811 | AI938066 | AI856288 | CF029905 | CF030137 |
| BW595904 | BW598077 | AI938066 | AI966221 | CF029905 | CF030310 |
| BW595904 | BW598627 | AI938066 | BE804557 | CF029905 | CF030556 |
| BW595904 | CB829270 | AI938066 | BG154911 | CF029905 | CF030768 |
| BW595904 | CB829507 | AI938066 | BG155456 | CF029905 | CF030833 |
| BW595904 | CN825233 | AI938066 | BG157067 | CF029905 | CF030851 |
| BW595904 | CN825692 | AI938066 | BI941949 | CF029905 | CF030937 |
| BW595921 | AU089541 | AI938066 | CA937697 | CF029905 | CF031113 |
| BW595935 | BW598661 | AI938074 | AI856420 | CF029905 | CF031152 |
| BW595948 | AW720221 | AI938074 | AI960073 | CF029964 | CF028520 |
| BW595957 | CN825752 | AI938074 | AI966221 | CF029964 | CF028686 |
| BW595999 | BW596388 | AI938074 | BE610450 | CF029964 | CF029256 |
| BW595999 | BW597072 | AI938074 | BE804557 | CF030063 | CF028520 |
| BW596048 | AW720535 | AI938074 | BF426095 | CF030063 | CF028686 |
| BW596048 | BI419375 | AI938074 | BG155152 | CF030063 | CF029256 |
| BW596048 | BW623073 | AI938074 | BG237075 | CF030084 | CF028520 |
| BW596048 | BW627437 | AI938074 | CA802377 | CF030084 | CF028686 |
| BW596074 | BW596388 | AI938074 | CA937697 | CF030084 | CF029256 |
| BW596074 | BW597072 | AI938076 | AI855535 | CF030095 | CF059330 |
| BW596115 | BI418765 | AI938076 | AI856288 | CF030108 | CF029571 |
| BW596125 | BW596388 | AI938076 | AI959949 | CF030108 | CF029649 |
| BW596125 | BW597072 | AI938076 | AI960073 | CF030108 | CF029888 |
| BW596160 | AW720019 | AI938076 | AW570368 | CF030108 | CF030021 |
| BW596160 | BW628655 | AI938076 | BE610450 | CF030108 | CF030220 |
| BW596160 | BW630435 | AI938076 | BE804557 | CF030108 | CF030250 |
| BW596160 | CB828778 | AI938076 | BG155152 | CF030108 | CF030386 |
| BW596172 | BW598661 | AI938076 | BG155456 | CF030108 | CF030577 |
| BW596197 | BW596942 | AI938076 | BG156603 | CF030108 | CF030643 |
| BW596224 | BI418998 | AI938076 | BG156931 | CF030108 | CF030705 |
| BW596224 | BW598090 | AI938076 | BG157011 | CF030108 | CF030869 |
| BW596224 | BW599696 | AI938076 | BG237075 | CF030108 | CF031201 |
| BW596224 | CB828479 | AI938076 | BI941949 | CF030108 | CF031226 |
| BW596224 | CB829166 | AI938076 | CA802377 | CF030108 | CF031671 |

|          |          |          |          |          |          |
|----------|----------|----------|----------|----------|----------|
| BW596234 | BW596388 | AI938076 | CA937697 | CF030108 | CF031736 |
| BW596234 | BW597072 | AI938162 | AI959980 | CF030108 | CF034120 |
| BW596319 | BW596388 | AI938162 | AI966249 | CF030160 | CD976648 |
| BW596319 | BW597072 | AI938171 | AI973974 | CF030160 | CF031059 |
| BW596380 | BW594977 | AI938244 | AI856288 | CF030160 | CF031637 |
| BW596383 | BW596388 | AI938244 | AI856420 | CF030160 | CF031672 |
| BW596383 | BW597072 | AI938244 | AI966221 | CF030193 | CF029649 |
| BW596399 | BI418998 | AI938244 | BE804557 | CF030193 | CF030220 |
| BW596399 | BW599696 | AI938244 | BF426095 | CF030193 | CF030250 |
| BW596399 | CB828479 | AI938244 | BG155456 | CF030193 | CF030386 |
| BW596486 | BW596388 | AI938244 | BG157067 | CF030193 | CF030577 |
| BW596486 | BW597072 | AI938244 | BI941949 | CF030193 | CF030643 |
| BW596499 | BW596388 | AI938244 | CA937697 | CF030193 | CF030869 |
| BW596499 | BW597072 | AI940815 | BI973309 | CF030193 | CF031736 |
| BW596506 | BW596691 | AI940817 | AW318141 | CF030193 | CF034120 |
| BW596506 | BW596913 | AI940861 | BI942688 | CF030208 | CF059330 |
| BW596510 | AW719627 | AI941145 | AW397445 | CF030238 | CF028520 |
| BW596510 | BI417935 | AI941167 | AW318222 | CF030238 | CF028724 |
| BW596510 | BI419085 | AI941180 | AW734630 | CF030238 | CF028891 |
| BW596510 | BI419708 | AI941193 | AW397445 | CF030238 | CF029146 |
| BW596510 | BW622830 | AI941201 | AI735945 | CF030246 | CF059330 |
| BW596540 | BW597589 | AI941201 | AW318141 | CF030262 | CF033288 |
| BW596554 | BP069812 | AI941206 | AW397445 | CF030399 | CF028520 |
| BW596567 | BI418510 | AI941239 | AI900170 | CF030399 | CF028686 |
| BW596637 | BW594752 | AI941248 | AI735945 | CF030399 | CF029256 |
| BW596678 | CB826865 | AI941249 | AW318141 | CF030456 | CF030129 |
| BW596697 | BW596388 | AI941373 | BM892192 | CF030456 | CF030242 |
| BW596697 | BW597072 | AI941375 | BI974262 | CF030456 | CF030310 |
| BW596768 | BI420722 | AI941375 | CA953347 | CF030456 | CF030637 |
| BW596790 | CB826865 | AI941395 | BG316158 | CF030456 | CF030646 |
| BW596795 | BW596388 | AI941395 | BM892192 | CF030456 | CF030768 |
| BW596795 | BW597072 | AI941395 | CA953216 | CF030456 | CF030851 |
| BW596820 | BW596388 | AI941395 | CA953339 | CF030456 | CF030937 |
| BW596820 | BW597072 | AI959781 | BE608642 | CF030456 | CF031014 |
| BW596840 | BW597618 | AI959794 | AW277739 | CF030456 | CF031156 |
| BW596852 | BW596388 | AI959864 | BG154580 | CF030456 | CF031232 |
| BW596852 | BW597072 | AI959864 | BG154621 | CF030456 | CF031240 |
| BW596855 | BI417531 | AI959977 | BG316158 | CF030456 | CF031243 |
| BW596855 | BI419809 | AI959977 | BM892192 | CF030482 | CD990665 |
| BW596900 | BW594977 | AI959977 | CA953216 | CF030482 | CF031075 |
| BW596969 | BW595975 | AI960006 | BU090873 | CF030565 | CD985555 |
| BW596986 | BW596310 | AI960074 | AI856288 | CF030567 | CF059330 |
| BW596986 | CB826617 | AI960074 | AI959949 | CF030631 | CF029559 |
| BW597001 | BW595178 | AI960074 | AI960073 | CF030631 | CF029608 |
| BW597019 | BW595975 | AI960074 | AI966221 | CF030631 | CF029944 |
| BW597049 | BW595975 | AI960074 | AW570368 | CF030631 | CF030109 |
| BW597059 | CB829296 | AI960074 | BE610450 | CF030631 | CF030146 |
| BW597095 | BI417982 | AI960074 | BE804557 | CF030631 | CF030470 |
| BW597095 | CB827064 | AI960074 | BG155456 | CF030631 | CF030682 |
| BW597137 | BW596388 | AI960074 | BG156603 | CF030631 | CF030740 |
| BW597137 | BW597072 | AI960074 | BG157011 | CF030631 | CF030755 |
| BW597148 | BW595490 | AI960074 | BG157067 | CF030631 | CF031666 |

|          |          |          |          |          |          |
|----------|----------|----------|----------|----------|----------|
| BW597157 | BW596388 | AI960074 | BI941949 | CF030631 | CF031730 |
| BW597157 | BW597072 | AI960074 | CA802377 | CF030769 | CF028427 |
| BW597239 | BW596077 | AI960074 | CA937697 | CF030769 | CF028520 |
| BW597248 | BW596388 | AI960698 | BG790963 | CF030769 | CF028618 |
| BW597248 | BW597072 | AI960812 | BI892561 | CF030769 | CF028686 |
| BW597268 | BW595178 | AI960852 | AI494797 | CF030785 | CF029677 |
| BW597268 | BW597704 | AI960896 | AI495703 | CF030785 | CF030166 |
| BW597313 | BW595586 | AI960961 | AW596008 | CF030785 | CF030220 |
| BW597327 | BW597280 | AI960997 | CA953347 | CF030785 | CF030275 |
| BW597358 | BW595975 | AI966005 | BM892192 | CF030785 | CF030577 |
| BW597359 | BW594445 | AI966076 | BM892192 | CF030785 | CF031736 |
| BW597368 | CB829296 | AI966107 | AW349571 | CF030837 | CF028724 |
| BW597402 | AW720221 | AI966284 | BU090873 | CF030837 | CF029256 |
| BW597403 | BI417982 | AI966324 | AW348358 | CF030854 | CF030299 |
| BW597403 | CB827064 | AI973566 | BM093460 | CF030854 | CF030390 |
| BW597404 | BW597072 | AI973569 | CA953232 | CF030854 | CF031601 |
| BW597446 | BI418149 | AI973574 | BI974336 | CF030854 | CF031675 |
| BW597446 | BW598095 | AI973767 | AI900477 | CF030854 | CF033205 |
| BW597446 | BW599003 | AI973801 | AI494908 | CF030854 | CF033307 |
| BW597446 | BW599041 | AI973827 | AW597335 | CF030854 | CF033862 |
| BW597446 | CB827489 | AI973827 | AW620251 | CF030854 | CF034111 |
| BW597446 | CN825567 | AI973827 | BE609219 | CF030854 | CF036464 |
| BW597458 | BI418998 | AI973827 | BE609228 | CF030884 | CF028427 |
| BW597458 | BW598090 | AI973827 | BE609247 | CF030884 | CF028520 |
| BW597458 | BW599696 | AI973827 | BI892581 | CF030884 | CF028618 |
| BW597458 | CB828479 | AI973827 | CB063866 | CF030884 | CF028686 |
| BW597458 | CB829166 | AI973858 | AI443258 | CF030896 | CF031435 |
| BW597461 | BW594534 | AI973986 | AI495116 | CF030897 | CF029930 |
| BW597492 | AI967817 | AI973989 | AI736357 | CF030897 | CF030129 |
| BW597492 | BW595311 | AI988050 | AI736952 | CF030897 | CF030309 |
| BW597564 | BW596388 | AI988058 | AI736952 | CF030897 | CF030310 |
| BW597564 | BW597072 | AI988093 | BM732780 | CF030897 | CF030664 |
| BW597657 | CB829296 | AI988204 | AI507717 | CF030897 | CF030771 |
| BW597683 | BW596388 | AI988281 | AI988180 | CF030897 | CF030833 |
| BW597683 | BW597072 | AI988324 | AI988192 | CF030897 | CF030851 |
| BW597691 | BI418450 | AI988495 | AW568734 | CF030897 | CF030953 |
| BW597709 | CB829296 | AI988495 | AW761071 | CF030897 | CF031126 |
| BW597711 | AI967535 | AI988495 | BF010100 | CF030897 | CF031459 |
| BW597711 | BI419313 | AI988495 | BG790913 | CF030897 | CF031639 |
| BW597711 | BW596438 | AI988495 | BI425463 | CF030897 | CF031704 |
| BW597711 | BW599085 | AI988524 | CA819488 | CF030897 | CF031714 |
| BW597711 | BW600057 | AI988606 | AI441060 | CF030897 | CF040036 |
| BW597711 | CB829174 | AI988606 | BG790280 | CF030897 | CF040055 |
| BW597711 | CB829426 | AI988606 | BI426366 | CF030920 | CD989805 |
| BW597728 | AW719839 | AI988606 | BI973156 | CF030975 | CF030137 |
| BW597728 | BF177907 | AW099012 | BI941791 | CF030975 | CF030310 |
| BW597728 | BI417827 | AW099026 | AW349326 | CF030975 | CF030556 |
| BW597728 | BI419767 | AW099026 | AW598087 | CF030975 | CF030768 |
| BW597728 | BI420173 | AW099026 | BE331297 | CF030975 | CF030833 |
| BW597728 | BP068319 | AW099026 | BG155528 | CF030975 | CF030851 |
| BW597728 | BP074235 | AW099044 | AW620600 | CF030975 | CF030937 |
| BW597728 | BW595872 | AW099055 | BG316348 | CF030975 | CF031113 |

|          |          |          |          |          |          |
|----------|----------|----------|----------|----------|----------|
| BW597728 | BW596285 | AW099068 | AI461043 | CF030975 | CF031152 |
| BW597728 | BW596482 | AW099073 | AW307093 | CF030978 | CF028427 |
| BW597728 | BW596621 | AW099073 | BE475295 | CF030978 | CF028520 |
| BW597728 | BW596754 | AW099087 | BE474946 | CF030978 | CF028618 |
| BW597728 | BW597096 | AW099657 | BG316158 | CF030978 | CF028686 |
| BW597728 | BW598372 | AW099657 | BM892192 | CF031031 | CF028520 |
| BW597728 | BW598761 | AW099657 | CA953216 | CF031031 | CF028686 |
| BW597728 | BW599653 | AW099663 | CA953216 | CF031031 | CF029256 |
| BW597728 | BW624103 | AW099663 | CA953339 | CF031066 | CD989805 |
| BW597728 | BW627519 | AW099682 | AI901200 | CF031125 | CD988316 |
| BW597728 | BW632468 | AW099689 | AI496396 | CF031125 | CD990241 |
| BW597737 | BW598095 | AW099693 | BG882625 | CF031125 | CF030474 |
| BW597737 | BW599003 | AW099727 | BG316158 | CF031125 | CF031011 |
| BW597737 | CN825567 | AW099777 | AW278923 | CF031125 | CF031544 |
| BW597779 | BW600013 | AW099853 | AW277876 | CF031125 | CF053790 |
| BW597782 | CB829296 | AW099917 | BE608642 | CF031190 | CD968065 |
| BW597834 | BW596388 | AW099951 | BM893397 | CF031199 | CF039075 |
| BW597834 | BW597072 | AW100018 | AW760771 | CF031216 | CD970302 |
| BW597839 | BW599737 | AW100028 | BF423606 | CF031216 | CD971191 |
| BW597845 | BW596388 | AW100041 | BG789939 | CF031216 | CD987633 |
| BW597845 | BW597072 | AW100129 | BI974262 | CF031216 | CF021557 |
| BW597849 | BW595779 | AW100129 | CA953347 | CF031216 | CF039461 |
| BW597869 | BI418639 | AW100134 | BM143134 | CF031216 | CF044391 |
| BW597869 | BI419940 | AW100259 | BF071687 | CF031216 | CF044651 |
| BW597876 | BW596388 | AW100273 | AI495077 | CF031216 | CF044725 |
| BW597876 | BW597072 | AW100286 | AI507717 | CF031216 | CF047696 |
| BW597971 | BW597280 | AW100398 | AI735949 | CF031216 | CF048383 |
| BW597977 | CB826865 | AW100429 | BG315767 | CF031216 | CF051525 |
| BW598018 | BW596388 | AW100601 | AW100238 | CF031216 | CF051931 |
| BW598018 | BW597072 | AW100661 | BF425968 | CF031227 | CD998417 |
| BW598074 | BW597072 | AW100691 | AW132538 | CF031227 | CF028427 |
| BW598109 | BW598661 | AW100712 | BI787537 | CF031227 | CF028520 |
| BW598119 | CB829296 | AW100751 | BF425968 | CF031227 | CF028618 |
| BW598131 | BW596388 | AW100767 | AI442897 | CF031227 | CF028686 |
| BW598131 | BW597072 | AW100801 | AW185742 | CF031227 | CF028891 |
| BW598144 | BW596388 | AW100801 | CA953459 | CF031227 | CF028968 |
| BW598144 | BW597072 | AW100861 | BF425968 | CF031227 | CF029256 |
| BW598149 | BW596959 | AW100887 | BF425968 | CF031229 | CF028427 |
| BW598158 | BI418639 | AW100931 | BF425968 | CF031229 | CF028520 |
| BW598158 | BI419940 | AW100948 | AI959949 | CF031229 | CF028618 |
| BW598177 | BI418998 | AW100948 | AI960073 | CF031229 | CF028686 |
| BW598177 | BW598090 | AW100948 | AI966221 | CF031229 | CF029256 |
| BW598177 | BW599696 | AW100948 | AW570368 | CF031278 | CD998417 |
| BW598177 | CB828479 | AW100948 | BE610450 | CF031278 | CF028427 |
| BW598210 | BW596388 | AW100948 | BE804557 | CF031278 | CF028520 |
| BW598210 | BW597072 | AW100948 | BG155456 | CF031278 | CF028618 |
| BW598279 | BW596388 | AW100948 | BG156603 | CF031278 | CF028686 |
| BW598279 | BW597072 | AW100948 | BG157011 | CF031278 | CF028891 |
| BW598282 | BW596388 | AW100948 | BG157067 | CF031278 | CF028968 |
| BW598282 | BW597072 | AW100948 | CA802377 | CF031278 | CF029256 |
| BW598291 | BW596959 | AW100948 | CA937697 | CF031288 | CF030299 |
| BW598318 | CB829296 | AW101126 | BF071200 | CF031288 | CF031357 |



|          |          |          |          |          |          |
|----------|----------|----------|----------|----------|----------|
| BW598330 | CB826865 | AW101133 | BF425968 | CF031288 | CF031491 |
| BW598369 | BW595178 | AW101133 | BI942572 | CF031288 | CF033205 |
| BW598369 | BW597704 | AW101169 | AW101542 | CF031288 | CF033862 |
| BW598373 | BW596388 | AW101173 | AI988329 | CF031288 | CF034014 |
| BW598373 | BW597072 | AW101191 | AI856420 | CF031288 | CF036496 |
| BW598464 | BW596388 | AW101191 | BE804557 | CF031350 | CF059131 |
| BW598464 | BW597072 | AW101191 | BF426095 | CF031484 | CF059330 |
| BW598515 | BW598661 | AW101191 | BG154911 | CF031637 | CF059131 |
| BW598551 | BW595178 | AW101191 | CA937697 | CF031661 | CD998417 |
| BW598551 | BW597704 | AW101192 | AI443733 | CF031661 | CF028427 |
| BW598599 | BW594977 | AW101245 | BM892192 | CF031661 | CF028520 |
| BW598604 | BW597308 | AW101270 | BG316158 | CF031661 | CF028618 |
| BW598622 | BW596388 | AW101372 | CA953467 | CF031661 | CF028686 |
| BW598622 | BW597072 | AW101382 | BG882142 | CF031661 | CF028891 |
| BW598636 | BW596388 | AW101463 | AW101022 | CF031661 | CF028968 |
| BW598636 | BW597072 | AW101463 | BE474932 | CF031661 | CF029256 |
| BW598673 | BW596388 | AW101473 | AW756933 | CF031672 | CF059131 |
| BW598673 | BW597072 | AW101476 | BI316576 | CF031721 | CD985555 |
| BW598685 | BW595178 | AW101478 | BE475541 | CF031751 | CD985555 |
| BW598757 | BW599603 | AW101589 | BF425968 | CF031872 | CF031871 |
| BW598797 | BI420722 | AW101613 | AW734059 | CF031872 | CF032395 |
| BW598821 | BW596388 | AW101695 | AW831226 | CF031872 | CF032517 |
| BW598821 | BW597072 | AW101732 | AI437916 | CF031872 | CF032744 |
| BW598857 | BW597072 | AW101732 | AI495116 | CF031882 | CD977002 |
| BW598893 | BW596388 | AW101732 | AI899969 | CF031895 | CF032291 |
| BW598893 | BW597072 | AW101732 | BG238379 | CF031965 | CD989442 |
| BW598901 | BW596388 | AW101732 | BI785974 | CF031983 | CF032773 |
| BW598901 | BW597072 | AW101732 | BM731760 | CF031983 | CF047670 |
| BW598913 | CB826865 | AW101732 | BM731851 | CF031983 | CF049211 |
| BW598942 | BW596388 | AW101732 | BM885122 | CF032006 | CF032039 |
| BW598942 | BW597072 | AW101732 | BM885523 | CF032006 | CF032143 |
| BW598943 | BW596388 | AW101750 | AW570448 | CF032006 | CF032159 |
| BW598943 | BW597072 | AW101750 | BF425968 | CF032006 | CF032171 |
| BW598961 | AW428840 | AW101862 | BE440484 | CF032006 | CF032266 |
| BW598977 | BW595178 | AW101930 | BM892805 | CF032006 | CF032291 |
| BW598977 | BW597704 | AW102350 | AI495703 | CF032006 | CF032373 |
| BW598982 | BI418765 | AW132188 | BE347314 | CF032006 | CF032454 |
| BW598989 | BW599830 | AW132242 | BM892192 | CF032006 | CF032521 |
| BW598995 | BW598725 | AW132242 | CA953216 | CF032006 | CF032709 |
| BW599001 | BW596388 | AW132279 | AW760925 | CF032006 | CF032755 |
| BW599001 | BW597072 | AW132370 | BM893084 | CF032006 | CF032764 |
| BW599059 | BP074276 | AW132371 | BM893084 | CF032006 | CF032803 |
| BW599071 | BW596388 | AW132377 | BG316158 | CF032006 | CF032874 |
| BW599071 | BW597072 | AW132377 | BM892192 | CF032018 | CF032121 |
| BW599079 | AU251734 | AW132377 | CA953216 | CF032018 | CF032143 |
| BW599098 | BW596388 | AW132391 | BU090814 | CF032018 | CF032159 |
| BW599098 | BW597072 | AW132417 | CA953216 | CF032018 | CF032161 |
| BW599120 | BW595178 | AW132417 | CA953339 | CF032018 | CF032266 |
| BW599120 | BW597704 | AW132449 | BM892192 | CF032018 | CF032291 |
| BW599135 | BW596388 | AW132515 | BM892192 | CF032018 | CF032454 |
| BW599135 | BW597072 | AW132519 | BM892192 | CF032018 | CF032521 |
| BW599179 | BI418946 | AW132546 | BE609074 | CF032018 | CF032709 |

|          |          |          |          |          |          |
|----------|----------|----------|----------|----------|----------|
| BW599179 | BP064996 | AW132546 | BF324373 | CF032018 | CF032755 |
| BW599181 | CB826865 | AW132546 | BM731574 | CF032018 | CF032764 |
| BW599195 | CB826865 | AW132546 | CA937880 | CF032018 | CF032874 |
| BW599269 | BW598661 | AW132549 | BE473543 | CF032054 | CD988415 |
| BW599280 | BP062879 | AW132577 | AW277739 | CF032089 | CD988415 |
| BW599315 | BP074276 | AW132580 | BM892192 | CF032102 | CF032039 |
| BW599371 | BW595178 | AW132600 | BM892192 | CF032102 | CF032143 |
| BW599371 | BW597704 | AW132600 | CA953216 | CF032102 | CF032171 |
| BW599411 | BW594977 | AW132602 | BG316158 | CF032124 | CF031833 |
| BW599419 | BW596388 | AW132602 | BM892192 | CF032124 | CF032039 |
| BW599419 | BW597072 | AW132602 | CA953216 | CF032124 | CF032143 |
| BW599428 | BW596388 | AW132683 | CA953216 | CF032124 | CF032159 |
| BW599428 | BW597072 | AW132683 | CA953339 | CF032124 | CF032171 |
| BW599434 | BW596388 | AW132693 | AI441281 | CF032124 | CF032291 |
| BW599434 | BW597072 | AW132740 | BG882625 | CF032124 | CF032373 |
| BW599463 | CB826865 | AW132740 | BI786492 | CF032124 | CF032521 |
| BW599472 | BW597072 | AW132779 | CA953216 | CF032124 | CF032568 |
| BW599528 | BW597072 | AW132779 | CA953339 | CF032124 | CF032581 |
| BW599530 | BW596388 | AW132792 | CA953216 | CF032124 | CF032600 |
| BW599530 | BW597072 | AW132792 | CA953339 | CF032124 | CF032691 |
| BW599544 | BP062879 | AW132793 | AW132361 | CF032124 | CF032709 |
| BW599577 | BW596388 | AW132793 | AW133026 | CF032124 | CF032755 |
| BW599577 | BW597072 | AW132793 | BE609236 | CF032124 | CF032764 |
| BW599625 | BW595178 | AW132793 | BG043338 | CF032124 | CF032802 |
| BW599625 | BW597704 | AW132793 | BG043342 | CF032124 | CF032803 |
| BW599652 | BW595178 | AW132793 | BM095031 | CF032156 | CD985555 |
| BW599668 | BW596388 | AW132813 | AW350012 | CF032162 | CD988415 |
| BW599668 | BW597072 | AW132813 | BM092965 | CF032205 | CF034343 |
| BW599678 | CB829296 | AW132815 | CA953216 | CF032244 | CF050168 |
| BW599686 | CB829296 | AW132815 | CA953339 | CF032254 | CF031880 |
| BW599690 | CB829296 | AW132826 | BI320434 | CF032254 | CF031976 |
| BW599695 | BP062547 | AW132843 | BG316158 | CF032254 | CF031986 |
| BW599695 | BP065178 | AW132843 | BM892192 | CF032254 | CF032186 |
| BW599695 | BP066648 | AW132843 | CA953216 | CF032254 | CF032203 |
| BW599712 | BW596388 | AW132851 | AW132844 | CF032254 | CF032372 |
| BW599712 | BW597072 | AW132851 | AW471672 | CF032254 | CF032462 |
| BW599721 | BW598725 | AW132851 | AW471798 | CF032254 | CF032724 |
| BW599787 | BW596388 | AW132851 | CA938231 | CF032294 | CD985555 |
| BW599866 | BW595178 | AW132876 | BM892192 | CF032584 | CD988415 |
| BW599866 | BW597704 | AW132876 | CA953216 | CF032704 | CD988415 |
| BW599882 | BW596388 | AW132876 | CA953339 | CF032828 | CD988415 |
| BW599882 | BW597072 | AW132881 | BM892192 | CF032918 | CF034335 |
| BW599986 | BW596388 | AW132881 | CA953216 | CF033017 | CF034335 |
| BW599986 | BW597072 | AW132881 | CA953339 | CF033108 | CD998215 |
| BW600001 | CB829296 | AW132917 | AI735949 | CF033143 | CD989688 |
| BW600014 | BW596388 | AW132918 | BG881608 | CF033144 | CD989344 |
| BW600014 | BW597072 | AW132920 | AI507717 | CF033173 | CD996556 |
| BW600020 | BW628977 | AW132981 | BM892192 | CF033180 | CD989390 |
| BW600025 | BW595178 | AW133011 | BG157353 | CF033204 | CF034335 |
| BW600025 | BW597704 | AW133035 | CA953216 | CF033208 | CD999420 |
| BW600031 | BW596388 | AW133035 | CA953339 | CF033208 | CF042719 |
| BW600031 | BW597072 | AW133040 | BI469879 | CF033211 | CD976634 |

|          |          |          |          |          |          |
|----------|----------|----------|----------|----------|----------|
| BW600072 | BW596388 | AW133067 | CA953216 | CF033211 | CF021728 |
| BW600072 | BW597072 | AW133067 | CA953339 | CF033274 | CD989344 |
| BW600082 | BW596388 | AW133071 | BG316158 | CF033327 | CD999420 |
| BW600082 | BW597072 | AW133071 | BM892192 | CF033327 | CF042719 |
| BW600105 | BI418510 | AW133071 | CA953216 | CF033357 | CD976634 |
| BW600105 | BW598482 | AW133097 | BM892192 | CF033374 | CF033288 |
| BW600153 | BW595178 | AW133097 | CA953216 | CF033380 | CF052932 |
| BW600153 | BW597704 | AW133097 | CA953339 | CF033394 | CD968197 |
| BW600155 | BW596388 | AW133100 | BG316158 | CF033394 | CD968617 |
| BW600155 | BW597072 | AW133100 | BM892192 | CF033394 | CD968624 |
| BW600165 | BW596388 | AW133100 | CA953216 | CF033394 | CD968770 |
| BW600165 | BW597072 | AW133112 | AI496396 | CF033394 | CD968816 |
| BW600171 | BP065485 | AW133112 | AI736604 | CF033394 | CD968819 |
| BW600180 | BW596388 | AW133114 | BM885409 | CF033394 | CD968834 |
| BW600180 | BW597072 | AW133128 | CA819043 | CF033394 | CD968883 |
| BW600182 | AW720221 | AW133140 | BI787537 | CF033394 | CD969081 |
| BW621335 | BW597308 | AW133150 | BM885271 | CF033394 | CD969095 |
| BW621405 | BW631440 | AW133180 | BM892192 | CF033394 | CD969118 |
| BW621525 | BW628728 | AW133193 | CA953216 | CF033394 | CD969197 |
| BW621525 | CB827448 | AW133193 | CA953339 | CF033394 | CD969247 |
| BW621553 | BW597308 | AW133202 | AI855682 | CF033394 | CD969334 |
| BW621640 | BW623042 | AW133208 | BM093413 | CF033394 | CD969705 |
| BW621742 | BW623042 | AW133212 | BG316158 | CF033394 | CD969737 |
| BW621812 | BW624964 | AW133254 | BM892192 | CF033394 | CD969745 |
| BW621842 | BW628977 | AW133254 | CA953216 | CF033394 | CD969870 |
| BW621856 | AW720235 | AW133254 | CA953339 | CF033394 | CD969930 |
| BW621856 | BW623088 | AW133265 | CA953216 | CF033394 | CD969975 |
| BW621856 | BW624069 | AW133265 | CA953339 | CF033394 | CF034375 |
| BW621856 | BW625056 | AW133279 | AI441281 | CF033396 | CF034335 |
| BW621856 | BW626246 | AW133290 | BF424196 | CF033418 | CD986633 |
| BW621856 | BW626580 | AW133290 | BM954974 | CF033428 | CF034335 |
| BW621856 | BW627420 | AW133335 | BM893263 | CF033594 | CD971097 |
| BW621856 | BW628365 | AW133336 | BM892192 | CF033594 | CF031843 |
| BW621856 | BW629747 | AW133336 | CA953216 | CF033594 | CF031852 |
| BW621856 | BW629958 | AW133336 | CA953339 | CF033594 | CF031865 |
| BW621856 | CB829655 | AW133349 | AI495703 | CF033594 | CF031951 |
| BW621919 | BW626925 | AW185465 | AW760925 | CF033594 | CF031952 |
| BW621940 | AW719874 | AW185750 | AW277876 | CF033594 | CF031990 |
| BW621940 | AW720663 | AW185756 | AI736604 | CF033594 | CF032088 |
| BW621940 | BI417762 | AW185837 | AI461194 | CF033594 | CF032207 |
| BW621940 | BI420514 | AW185837 | AW186378 | CF033594 | CF032302 |
| BW621940 | BW597042 | AW185837 | AW277568 | CF033594 | CF032331 |
| BW621940 | BW621684 | AW185837 | AW308980 | CF033594 | CF032491 |
| BW621940 | BW621898 | AW185837 | AW395661 | CF033594 | CF032551 |
| BW621940 | BW621906 | AW185837 | AW568413 | CF033594 | CF032766 |
| BW621940 | BW622291 | AW185837 | AW704443 | CF033594 | CF046609 |
| BW621940 | BW622564 | AW185837 | AW705384 | CF033629 | CD989805 |
| BW621940 | BW622688 | AW185837 | BE347206 | CF033631 | CD973889 |
| BW621940 | BW623128 | AW185837 | BE440604 | CF033654 | CF037193 |
| BW621940 | BW623261 | AW185837 | BE440676 | CF033656 | CX129474 |
| BW621940 | BW623470 | AW185837 | BE473331 | CF033698 | CD974899 |
| BW621940 | BW623504 | AW185837 | BG237005 | CF033698 | CF031843 |

|          |          |          |          |          |          |
|----------|----------|----------|----------|----------|----------|
| BW621940 | BW623681 | AW185837 | BI785456 | CF033698 | CF031849 |
| BW621940 | BW624562 | AW185837 | BI973265 | CF033698 | CF031852 |
| BW621940 | BW624729 | AW185837 | BI973964 | CF033698 | CF031865 |
| BW621940 | BW624836 | AW185837 | BM885009 | CF033698 | CF031903 |
| BW621940 | BW624986 | AW185837 | CA803070 | CF033698 | CF031951 |
| BW621940 | BW625125 | AW185854 | CA953049 | CF033698 | CF031952 |
| BW621940 | BW625448 | AW185870 | BF009609 | CF033698 | CF032302 |
| BW621940 | BW625465 | AW185982 | AW277739 | CF033698 | CF032491 |
| BW621940 | BW625982 | AW186030 | BG881608 | CF033698 | CF032766 |
| BW621940 | BW626033 | AW186345 | AI736721 | CF033698 | CF044944 |
| BW621940 | BW626322 | AW186396 | AW433032 | CF033766 | CD989805 |
| BW621940 | BW626934 | AW186439 | AI437518 | CF033852 | CF033747 |
| BW621940 | BW627080 | AW186444 | AW102327 | CF033873 | CD976893 |
| BW621940 | BW627299 | AW186444 | BF068719 | CF033873 | CF049198 |
| BW621940 | BW627479 | AW186444 | BF596650 | CF033873 | CF057171 |
| BW621940 | BW627590 | AW186462 | BF596451 | CF034051 | CF034176 |
| BW621940 | BW627720 | AW186508 | BE608642 | CF034081 | CF037193 |
| BW621940 | BW627834 | AW200689 | AW781828 | CF034157 | CF037193 |
| BW621940 | BW627918 | AW200791 | BI786410 | CF034168 | CD971097 |
| BW621940 | BW628329 | AW200878 | AW760786 | CF034168 | CF032302 |
| BW621940 | BW628472 | AW200878 | AW780606 | CF034168 | CF032491 |
| BW621940 | BW628512 | AW200878 | AW832613 | CF034168 | CF032551 |
| BW621940 | BW628607 | AW200878 | AW832644 | CF034277 | CD971097 |
| BW621940 | BW628740 | AW200878 | CA937711 | CF034277 | CF031843 |
| BW621940 | BW628767 | AW200878 | CA953289 | CF034277 | CF031852 |
| BW621940 | BW629247 | AW200924 | AW761368 | CF034277 | CF031951 |
| BW621940 | BW629575 | AW200940 | BM892192 | CF034277 | CF031952 |
| BW621940 | BW629673 | AW200993 | AW277739 | CF034277 | CF032302 |
| BW621940 | BW629767 | AW200997 | AW756933 | CF034277 | CF032331 |
| BW621940 | BW630484 | AW200997 | CA953347 | CF034277 | CF032491 |
| BW621940 | BW630621 | AW201012 | CA953216 | CF034277 | CF032551 |
| BW621940 | BW630746 | AW201012 | CA953339 | CF034277 | CF032766 |
| BW621940 | BW631236 | AW201039 | BE473548 | CF034277 | CF046609 |
| BW621940 | BW631443 | AW201053 | AW201956 | CF034384 | CF033320 |
| BW621940 | BW631527 | AW201058 | BI787537 | CF034440 | CD996556 |
| BW621940 | BW632200 | AW201214 | AI443814 | CF034442 | CF034466 |
| BW621940 | BW632381 | AW201236 | BM094734 | CF034492 | CD974899 |
| BW621940 | BW632390 | AW201236 | CA953049 | CF034492 | CF031843 |
| BW621940 | BW632585 | AW201291 | AI988588 | CF034492 | CF031849 |
| BW621940 | BW633094 | AW201297 | AW202274 | CF034492 | CF031852 |
| BW621940 | CB826665 | AW201331 | BG316158 | CF034492 | CF031865 |
| BW621940 | CB826666 | AW201377 | AW308792 | CF034492 | CF031903 |
| BW621979 | BW624004 | AW201379 | CB063702 | CF034492 | CF031951 |
| BW622022 | BW626925 | AW201403 | BM893263 | CF034492 | CF031952 |
| BW622078 | BW624004 | AW201446 | AI443814 | CF034492 | CF031990 |
| BW622078 | BW631345 | AW201446 | AW348358 | CF034492 | CF032088 |
| BW622152 | BW597308 | AW201494 | AI443660 | CF034492 | CF032207 |
| BW622168 | BW624004 | AW201494 | CA953489 | CF034492 | CF032491 |
| BW622168 | BW631345 | AW201570 | BM093318 | CF034492 | CF032766 |
| BW622225 | BW623042 | AW201615 | BG238673 | CF034492 | CF044944 |
| BW622268 | BW624004 | AW201615 | BM892192 | CF034509 | CF033758 |
| BW622268 | BW631345 | AW201615 | CA953216 | CF034666 | CF035265 |

|          |          |          |          |          |          |
|----------|----------|----------|----------|----------|----------|
| BW622349 | BW624004 | AW201615 | CA953339 | CF034666 | CF036004 |
| BW622349 | BW631345 | AW201625 | BG316158 | CF034716 | CD971097 |
| BW622395 | BW626925 | AW201625 | BM892192 | CF034716 | CD974899 |
| BW622439 | BW624004 | AW201625 | CA953216 | CF034716 | CF031843 |
| BW622452 | BW626925 | AW201652 | BG237551 | CF034716 | CF031849 |
| BW622554 | BW626925 | AW201740 | BG238673 | CF034716 | CF031852 |
| BW622568 | BG662277 | AW201753 | BG882363 | CF034716 | CF031865 |
| BW622568 | BI418763 | AW201780 | AW132573 | CF034716 | CF031903 |
| BW622627 | BU494499 | AW201780 | AW782206 | CF034716 | CF031951 |
| BW622699 | BW624004 | AW201784 | AW759909 | CF034716 | CF031952 |
| BW622770 | BW597308 | AW201797 | AW570504 | CF034716 | CF031990 |
| BW622804 | BW622412 | AW201809 | AI443733 | CF034716 | CF032088 |
| BW622804 | BW624149 | AW201809 | AI494797 | CF034716 | CF032207 |
| BW622862 | AW719956 | AW201809 | AI495703 | CF034716 | CF032302 |
| BW622862 | BI417337 | AW201834 | CA952921 | CF034716 | CF032331 |
| BW622862 | BI417452 | AW201877 | AI443814 | CF034716 | CF032491 |
| BW622862 | BI417630 | AW201898 | BF595368 | CF034716 | CF032551 |
| BW622862 | BI418056 | AW201899 | BF596768 | CF034716 | CF032766 |
| BW622862 | BI418314 | AW201954 | BF596179 | CF034716 | CF044944 |
| BW622862 | BI419213 | AW202014 | AW596108 | CF034716 | CF046609 |
| BW622862 | BI420087 | AW202078 | CA819075 | CF034829 | CF040808 |
| BW622862 | BI420905 | AW202124 | BF594977 | CF034830 | CD980036 |
| BW622862 | BI420913 | AW202137 | AI441283 | CF034830 | CF037123 |
| BW622862 | BP068116 | AW202187 | AW201242 | CF034837 | CD980900 |
| BW622862 | BP070755 | AW202203 | CA953216 | CF034842 | CF040043 |
| BW622862 | BP072002 | AW202203 | CA953339 | CF034842 | CF040073 |
| BW622862 | BW597897 | AW202204 | AW200868 | CF034884 | CD970781 |
| BW622862 | BW621340 | AW202212 | AI443814 | CF034900 | CF036471 |
| BW622862 | BW621379 | AW202235 | AI748322 | CF034900 | CF036852 |
| BW622862 | BW621386 | AW202286 | BI974262 | CF034900 | CF036982 |
| BW622862 | BW621417 | AW202311 | AW277739 | CF034900 | CF039276 |
| BW622862 | BW621427 | AW202331 | AI496396 | CF034933 | CF040043 |
| BW622862 | BW621428 | AW202331 | AI736604 | CF034933 | CF040073 |
| BW622862 | BW621430 | AW202336 | AI736632 | CF034944 | CF038709 |
| BW622862 | BW621471 | AW202353 | BM085161 | CF034949 | CF037679 |
| BW622862 | BW621499 | AW202356 | AW759210 | CF034986 | CF052022 |
| BW622862 | BW621511 | AW202387 | AI736604 | CF035116 | CF052248 |
| BW622862 | BW621514 | AW202395 | AI930682 | CF035240 | CF039037 |
| BW622862 | BW621522 | AW202395 | AW761298 | CF035319 | CF041705 |
| BW622862 | BW621529 | AW202395 | BE440655 | CF035368 | CF035445 |
| BW622862 | BW621550 | AW202395 | BM732688 | CF035427 | CD987288 |
| BW622862 | BW621560 | AW202419 | BG789482 | CF035458 | CD987288 |
| BW622862 | BW621572 | AW277338 | AW348208 | CF035509 | CF037761 |
| BW622862 | BW621587 | AW277338 | AW348217 | CF035509 | CF037771 |
| BW622862 | BW621617 | AW277342 | AI794688 | CF035509 | CF038537 |
| BW622862 | BW621619 | AW277342 | AW277878 | CF035509 | CF042780 |
| BW622862 | BW621647 | AW277342 | AW705048 | CF035509 | CF052446 |
| BW622862 | BW621668 | AW277373 | BM732780 | CF035526 | CF045019 |
| BW622862 | BW621711 | AW277399 | CA953467 | CF035526 | CF051066 |
| BW622862 | BW621721 | AW277542 | AW395781 | CF035555 | CF034949 |
| BW622862 | BW621747 | AW277547 | AI440617 | CF035621 | CF038248 |
| BW622862 | BW621758 | AW277547 | AI461075 | CF035839 | CF035046 |

|          |          |          |          |          |          |
|----------|----------|----------|----------|----------|----------|
| BW622862 | BW621784 | AW277547 | AI461194 | CF035839 | CF037312 |
| BW622862 | BW621785 | AW277547 | AW705377 | CF035839 | CF037833 |
| BW622862 | BW621815 | AW277547 | BI973964 | CF035839 | CF039875 |
| BW622862 | BW621834 | AW277547 | BM093175 | CF035839 | CF040057 |
| BW622862 | BW621872 | AW277618 | BE608642 | CF035839 | CF040263 |
| BW622862 | BW621875 | AW277628 | AW781828 | CF035839 | CF054962 |
| BW622862 | BW621896 | AW277630 | AW756933 | CF035870 | CF036939 |
| BW622862 | BW621900 | AW277742 | BI974262 | CF035899 | CD987496 |
| BW622862 | BW621902 | AW277786 | AW278111 | CF035899 | CF055277 |
| BW622862 | BW621909 | AW277786 | AW307065 | CF035929 | CF034343 |
| BW622862 | BW621934 | AW277878 | AW277623 | CF035932 | CF037521 |
| BW622862 | BW621939 | AW278102 | AW101691 | CF036025 | CF035892 |
| BW622862 | BW621944 | AW278110 | AW278161 | CF036046 | CF045019 |
| BW622862 | BW621971 | AW278192 | BE473579 | CF036078 | CF036554 |
| BW622862 | BW621975 | AW278254 | AW278161 | CF036078 | CF036809 |
| BW622862 | BW622028 | AW278256 | AI988428 | CF036099 | CF034823 |
| BW622862 | BW622046 | AW278366 | BG881461 | CF036148 | CF035054 |
| BW622862 | BW622047 | AW278470 | AW308980 | CF036148 | CF036487 |
| BW622862 | BW622055 | AW278561 | AI735949 | CF036155 | CF037361 |
| BW622862 | BW622070 | AW278586 | BI974262 | CF036177 | CF038958 |
| BW622862 | BW622106 | AW278605 | BM732780 | CF036187 | CF040043 |
| BW622862 | BW622121 | AW278657 | AW099133 | CF036187 | CF040073 |
| BW622862 | BW622140 | AW278666 | BM893263 | CF036201 | CF037967 |
| BW622862 | BW622163 | AW279014 | AW185753 | CF036219 | CF052022 |
| BW622862 | BW622202 | AW279037 | AW570373 | CF036303 | CF052022 |
| BW622862 | BW622243 | AW279073 | CA935219 | CF036365 | CF059478 |
| BW622862 | BW622259 | AW279075 | BG881608 | CF036365 | CF060290 |
| BW622862 | BW622269 | AW279204 | BG316158 | CF036415 | CD973027 |
| BW622862 | BW622282 | AW279204 | BM892192 | CF036415 | CD974274 |
| BW622862 | BW622325 | AW279204 | CA953216 | CF036415 | CF038074 |
| BW622862 | BW622334 | AW279216 | BM892192 | CF036420 | CF054151 |
| BW622862 | BW622337 | AW279242 | BM892192 | CF036420 | CF055674 |
| BW622862 | BW622344 | AW279242 | CA953216 | CF036430 | CD972825 |
| BW622862 | BW622348 | AW279242 | CA953339 | CF036430 | CD975396 |
| BW622862 | BW622409 | AW279244 | BG316158 | CF036430 | CD975416 |
| BW622862 | BW622411 | AW279244 | BM892192 | CF036430 | CD976761 |
| BW622862 | BW622427 | AW279244 | CA953216 | CF036430 | CD985740 |
| BW622862 | BW622460 | AW279340 | BM892192 | CF036430 | CD985853 |
| BW622862 | BW622480 | AW279340 | CA953216 | CF036430 | CF031858 |
| BW622862 | BW622523 | AW279340 | CA953339 | CF036430 | CF031945 |
| BW622862 | BW622524 | AW279343 | BG882625 | CF036430 | CF031973 |
| BW622862 | BW622529 | AW279379 | BG882625 | CF036430 | CF031978 |
| BW622862 | BW622543 | AW279379 | BI786492 | CF036430 | CF031991 |
| BW622862 | BW622563 | AW279480 | BM085817 | CF036430 | CF032063 |
| BW622862 | BW622572 | AW279506 | AI443733 | CF036430 | CF032117 |
| BW622862 | BW622595 | AW279506 | AI495703 | CF036430 | CF032304 |
| BW622862 | BW622607 | AW279558 | AW308980 | CF036430 | CF032386 |
| BW622862 | BW622638 | AW306781 | AW277876 | CF036430 | CF032682 |
| BW622862 | BW622653 | AW306786 | AI443732 | CF036430 | CF032754 |
| BW622862 | BW622691 | AW306786 | AW307304 | CF036430 | CF033661 |
| BW622862 | BW622700 | AW306786 | BE347057 | CF036430 | CF033992 |
| BW622862 | BW622752 | AW306786 | BE474243 | CF036430 | CF034003 |

|          |          |          |          |          |          |
|----------|----------|----------|----------|----------|----------|
| BW622862 | BW622808 | AW306786 | BG789601 | CF036430 | CF034032 |
| BW622862 | BW622811 | AW306786 | BI316253 | CF036430 | CF034901 |
| BW622862 | BW622820 | AW306786 | BI785200 | CF036430 | CF035733 |
| BW622862 | BW622825 | AW306786 | BI972652 | CF036430 | CF038208 |
| BW622862 | BW622841 | AW306786 | BM892262 | CF036430 | CF038572 |
| BW622862 | BW622864 | AW306786 | BM893482 | CF036430 | CF039138 |
| BW622862 | BW622882 | AW306799 | BE475197 | CF036430 | CF055042 |
| BW622862 | BW622890 | AW306805 | BE608617 | CF036452 | CD987288 |
| BW622862 | BW622911 | AW307027 | AW277958 | CF036466 | CF044472 |
| BW622862 | BW622953 | AW307163 | BM892017 | CF036475 | CF035475 |
| BW622862 | BW622957 | AW307252 | AW102319 | CF036490 | CF037229 |
| BW622862 | BW622975 | AW307287 | AI496396 | CF036500 | CF036457 |
| BW622862 | BW623001 | AW307287 | AI736604 | CF036570 | CF035475 |
| BW622862 | BW623023 | AW307357 | AW760925 | CF036595 | CF037967 |
| BW622862 | BW623029 | AW307388 | BI973720 | CF036626 | CF046343 |
| BW622862 | BW623047 | AW307437 | AW569318 | CF036626 | CF047507 |
| BW622862 | BW623063 | AW307483 | AI736604 | CF036626 | CF052096 |
| BW622862 | BW623075 | AW307523 | BM094734 | CF036632 | CF036130 |
| BW622862 | BW623130 | AW307523 | CA953049 | CF036632 | CF036331 |
| BW622862 | BW623135 | AW308738 | CA953232 | CF036632 | CF036891 |
| BW622862 | BW623137 | AW308766 | AW397689 | CF036636 | CF054646 |
| BW622862 | BW623139 | AW308766 | AW757220 | CF036645 | CF034807 |
| BW622862 | BW623150 | AW308766 | BE331160 | CF036645 | CF034841 |
| BW622862 | BW623165 | AW308796 | BG316158 | CF036645 | CF035441 |
| BW622862 | BW623167 | AW308798 | BE347298 | CF036645 | CF035595 |
| BW622862 | BW623189 | AW308874 | BI942688 | CF036645 | CF036007 |
| BW622862 | BW623229 | AW308896 | BF070153 | CF036645 | CF036965 |
| BW622862 | BW623266 | AW308982 | AW348162 | CF036645 | CF038107 |
| BW622862 | BW623312 | AW308982 | BE347012 | CF036654 | CF049161 |
| BW622862 | BW623343 | AW308982 | BE609472 | CF036665 | CF054646 |
| BW622862 | BW623416 | AW308982 | BE609921 | CF036670 | CD987288 |
| BW622862 | BW623461 | AW308982 | BF010436 | CF036679 | CF035472 |
| BW622862 | BW623466 | AW308982 | BF596796 | CF036679 | CF036441 |
| BW622862 | BW623492 | AW309219 | BE608642 | CF036680 | CD981877 |
| BW622862 | BW623533 | AW310540 | BU090853 | CF036680 | CD982005 |
| BW622862 | BW623545 | AW310584 | BE473548 | CF036680 | CF033229 |
| BW622862 | BW623561 | AW310691 | AW348358 | CF036680 | CF053151 |
| BW622862 | BW623578 | AW310695 | AW277739 | CF036686 | CF035907 |
| BW622862 | BW623586 | AW310902 | AI736357 | CF036686 | CF036069 |
| BW622862 | BW623590 | AW310972 | BI787537 | CF036712 | CF035892 |
| BW622862 | BW623592 | AW311046 | BE804557 | CF036715 | CF036213 |
| BW622862 | BW623598 | AW311046 | BG154911 | CF036716 | CF035246 |
| BW622862 | BW623599 | AW311046 | CA937697 | CF036716 | CF041601 |
| BW622862 | BW623627 | AW317728 | AI735945 | CF036716 | CF048845 |
| BW622862 | BW623639 | AW317744 | CA953347 | CF036742 | CF051530 |
| BW622862 | BW623643 | AW317756 | AW397445 | CF036742 | CF053503 |
| BW622862 | BW623645 | AW317770 | AW756933 | CF036778 | CF037913 |
| BW622862 | BW623675 | AW317816 | AI735949 | CF036778 | CF055314 |
| BW622862 | BW623691 | AW317835 | AI735945 | CF036811 | CD987044 |
| BW622862 | BW623708 | AW317864 | AI960844 | CF036811 | CF035954 |
| BW622862 | BW623710 | AW317910 | AW277608 | CF036811 | CF048382 |
| BW622862 | BW623722 | AW317914 | AI735945 | CF036811 | CF050896 |

|          |          |          |          |          |          |
|----------|----------|----------|----------|----------|----------|
| BW622862 | BW623731 | AW317914 | AW318141 | CF036814 | CD975872 |
| BW622862 | BW623737 | AW317951 | AI735948 | CF036814 | CD977634 |
| BW622862 | BW623743 | AW317951 | AW099954 | CF036846 | CF036939 |
| BW622862 | BW623746 | AW317951 | AW317998 | CF036866 | CD990410 |
| BW622862 | BW623816 | AW317951 | AW318146 | CF036902 | CF037123 |
| BW622862 | BW623831 | AW318033 | AI735945 | CF036916 | CF035054 |
| BW622862 | BW623835 | AW318124 | BE346937 | CF036916 | CF036487 |
| BW622862 | BW623838 | AW318124 | BG156357 | CF036968 | CF034879 |
| BW622862 | BW623850 | AW318127 | AW397445 | CF036968 | CF034918 |
| BW622862 | BW623853 | AW318144 | AW318141 | CF036968 | CF034941 |
| BW622862 | BW623866 | AW318169 | AW099891 | CF036968 | CF035050 |
| BW622862 | BW623886 | AW318171 | AW397445 | CF036968 | CF035059 |
| BW622862 | BW623900 | AW318214 | AW318141 | CF036968 | CF035129 |
| BW622862 | BW623943 | AW318231 | AW397445 | CF036968 | CF035159 |
| BW622862 | BW623946 | AW318285 | AI440692 | CF036968 | CF035350 |
| BW622862 | BW623952 | AW318322 | AI735945 | CF036968 | CF035392 |
| BW622862 | BW623972 | AW318322 | AW318141 | CF036968 | CF035416 |
| BW622862 | BW624001 | AW348074 | BI973150 | CF036968 | CF035496 |
| BW622862 | BW624002 | AW348178 | CA937978 | CF036968 | CF035519 |
| BW622862 | BW624010 | AW348245 | AW759628 | CF036968 | CF035547 |
| BW622862 | BW624045 | AW348312 | BI787520 | CF036968 | CF035606 |
| BW622862 | BW624054 | AW348317 | AW277739 | CF036968 | CF035810 |
| BW622862 | BW624084 | AW348532 | AI736972 | CF036968 | CF035833 |
| BW622862 | BW624086 | AW348729 | BE474185 | CF036968 | CF035869 |
| BW622862 | BW624091 | AW348858 | AW569912 | CF036968 | CF035908 |
| BW622862 | BW624150 | AW348858 | BM732773 | CF036968 | CF036125 |
| BW622862 | BW624152 | AW348871 | BI972504 | CF036968 | CF036455 |
| BW622862 | BW624170 | AW348916 | AI442821 | CF036968 | CF036560 |
| BW622862 | BW624241 | AW348916 | AW310920 | CF036968 | CF036594 |
| BW622862 | BW624253 | AW348916 | AW351163 | CF036968 | CF036611 |
| BW622862 | BW624273 | AW348916 | AW780552 | CF036968 | CF036655 |
| BW622862 | BW624285 | AW349016 | BI786492 | CF036968 | CF036719 |
| BW622862 | BW624323 | AW349079 | BM093617 | CF036968 | CF036792 |
| BW622862 | BW624328 | AW349124 | BI786492 | CF036968 | CF036829 |
| BW622862 | BW624345 | AW349140 | AW620587 | CF036968 | CF036858 |
| BW622862 | BW624347 | AW349494 | AI443191 | CF036968 | CF037189 |
| BW622862 | BW624375 | AW349494 | AW348731 | CF036968 | CF037221 |
| BW622862 | BW624390 | AW349534 | AI442818 | CF036968 | CF037249 |
| BW622862 | BW624405 | AW349538 | BI972557 | CF036968 | CF037251 |
| BW622862 | BW624440 | AW349842 | AW620209 | CF036968 | CF037309 |
| BW622862 | BW624452 | AW349943 | BE473672 | CF036968 | CF037405 |
| BW622862 | BW624463 | AW350221 | BF009372 | CF036968 | CF037469 |
| BW622862 | BW624472 | AW350346 | BE475532 | CF036968 | CF037491 |
| BW622862 | BW624483 | AW350376 | AW781828 | CF036968 | CF037492 |
| BW622862 | BW624513 | AW350388 | AW279404 | CF036968 | CF037504 |
| BW622862 | BW624520 | AW350413 | AW705025 | CF036968 | CF037549 |
| BW622862 | BW624528 | AW350531 | AI496579 | CF036968 | CF038335 |
| BW622862 | BW624534 | AW350545 | AI441425 | CF036968 | CF040355 |
| BW622862 | BW624538 | AW350545 | AI442333 | CF036968 | CF040800 |
| BW622862 | BW624559 | AW350545 | AI495740 | CF036968 | CF048437 |
| BW622862 | BW624565 | AW350545 | AI496308 | CF036968 | CF049638 |
| BW622862 | BW624573 | AW350545 | BI424290 | CF036968 | CF051058 |



|          |          |          |          |          |          |
|----------|----------|----------|----------|----------|----------|
| BW622862 | BW624576 | AW350545 | BI943716 | CF036968 | CF052646 |
| BW622862 | BW624581 | AW350545 | BI945008 | CF036968 | CF055980 |
| BW622862 | BW624616 | AW350615 | BM892639 | CF036968 | CF057259 |
| BW622862 | BW624667 | AW350731 | AW201956 | CF036974 | CF036125 |
| BW622862 | BW624681 | AW350976 | AW102319 | CF036974 | CF036131 |
| BW622862 | BW624724 | AW350981 | AI736357 | CF036974 | CF036477 |
| BW622862 | BW624726 | AW351040 | BI785449 | CF036986 | CF038064 |
| BW622862 | BW624763 | AW351060 | AI442947 | CF037092 | CF040808 |
| BW622862 | BW624773 | AW351105 | AI960887 | CF037095 | CD972959 |
| BW622862 | BW624833 | AW351105 | AW308980 | CF037095 | CD973535 |
| BW622862 | BW624853 | AW351142 | BE807481 | CF037095 | CD982411 |
| BW622862 | BW624860 | AW351170 | CA953333 | CF037095 | CD998752 |
| BW622862 | BW624934 | AW351184 | BM731584 | CF037095 | CF037121 |
| BW622862 | BW624953 | AW351184 | BM892746 | CF037095 | CF037894 |
| BW622862 | BW625004 | AW394346 | CA953216 | CF037095 | CF039982 |
| BW622862 | BW625028 | AW394346 | CA953339 | CF037095 | CF042724 |
| BW622862 | BW625038 | AW394380 | BG316158 | CF037095 | CF048173 |
| BW622862 | BW625046 | AW394380 | BM892192 | CF037095 | CF049131 |
| BW622862 | BW625050 | AW394380 | CA953216 | CF037095 | CF049557 |
| BW622862 | BW625072 | AW395598 | BF424324 | CF037095 | CF049579 |
| BW622862 | BW625110 | AW395823 | AW318141 | CF037095 | CF050056 |
| BW622862 | BW625128 | AW395847 | CA953216 | CF037095 | CF051371 |
| BW622862 | BW625130 | AW395847 | CA953339 | CF037095 | CF054264 |
| BW622862 | BW625171 | AW395856 | BM893263 | CF037182 | CD986327 |
| BW622862 | BW625223 | AW395878 | AW201242 | CF037182 | CF033390 |
| BW622862 | BW625232 | AW395985 | BM893263 | CF037182 | CF048582 |
| BW622862 | BW625258 | AW396196 | BG316158 | CF037190 | CF037321 |
| BW622862 | BW625276 | AW396196 | BM892192 | CF037190 | CF053208 |
| BW622862 | BW625290 | AW396196 | CA953216 | CF037208 | CF052022 |
| BW622862 | BW625314 | AW396225 | BU090814 | CF037219 | CF029559 |
| BW622862 | BW625353 | AW396314 | BI943332 | CF037219 | CF029944 |
| BW622862 | BW625366 | AW396344 | BM893263 | CF037219 | CF030109 |
| BW622862 | BW625377 | AW396844 | AI735945 | CF037219 | CF030146 |
| BW622862 | BW625383 | AW396863 | AI735945 | CF037219 | CF030225 |
| BW622862 | BW625414 | AW396863 | AW318141 | CF037219 | CF030372 |
| BW622862 | BW625498 | AW396905 | AI735945 | CF037219 | CF030658 |
| BW622862 | BW625533 | AW396905 | AW318141 | CF037219 | CF030755 |
| BW622862 | BW625555 | AW396927 | AW397445 | CF037219 | CF031486 |
| BW622862 | BW625589 | AW396967 | BM093570 | CF037219 | CF031666 |
| BW622862 | BW625593 | AW397064 | AI735945 | CF037219 | CF031730 |
| BW622862 | BW625629 | AW397064 | AW318141 | CF037232 | CD997049 |
| BW622862 | BW625642 | AW397110 | BU090853 | CF037278 | CF052022 |
| BW622862 | BW625646 | AW397122 | BG882625 | CF037371 | CF029608 |
| BW622862 | BW625650 | AW397122 | BI786492 | CF037371 | CF030658 |
| BW622862 | BW625686 | AW397319 | AI735945 | CF037371 | CF031666 |
| BW622862 | BW625697 | AW397319 | AW318141 | CF037390 | CF041562 |
| BW622862 | BW625737 | AW397339 | AW397445 | CF037427 | CD974638 |
| BW622862 | BW625742 | AW397412 | AI735945 | CF037551 | CF048769 |
| BW622862 | BW625746 | AW397412 | AW318141 | CF037672 | CF036575 |
| BW622862 | BW625764 | AW397472 | AW318141 | CF037680 | CF039151 |
| BW622862 | BW625767 | AW397513 | AW318141 | CF037730 | CF054396 |
| BW622862 | BW625788 | AW397577 | BM954956 | CF037752 | CF050647 |

|          |          |          |          |          |          |
|----------|----------|----------|----------|----------|----------|
| BW622862 | BW625808 | AW397816 | AI735945 | CF037797 | CF048769 |
| BW622862 | BW625837 | AW397816 | AW318141 | CF037815 | CF050070 |
| BW622862 | BW625857 | AW397859 | AW397445 | CF037873 | CF035046 |
| BW622862 | BW625863 | AW397862 | AW397445 | CF037873 | CF035834 |
| BW622862 | BW625870 | AW397956 | AI735945 | CF037873 | CF037312 |
| BW622862 | BW625884 | AW397956 | AW318141 | CF037873 | CF037833 |
| BW622862 | BW625914 | AW433018 | BI974368 | CF037873 | CF039875 |
| BW622862 | BW625923 | AW433024 | AW185956 | CF037873 | CF040263 |
| BW622862 | BW625954 | AW433024 | BM954986 | CF037947 | CD974638 |
| BW622862 | BW625961 | AW433035 | AI735945 | CF038034 | CF039646 |
| BW622862 | BW625970 | AW433041 | AW318141 | CF038099 | CF038248 |
| BW622862 | BW625979 | AW433045 | AW397445 | CF038185 | CF035421 |
| BW622862 | BW626008 | AW433089 | AW397232 | CF038205 | CD979176 |
| BW622862 | BW626078 | AW433090 | AW397445 | CF038240 | CF049412 |
| BW622862 | BW626080 | AW459984 | BI316340 | CF038351 | CF036939 |
| BW622862 | BW626109 | AW460034 | AW318141 | CF038391 | CF035046 |
| BW622862 | BW626147 | AW460107 | AI735945 | CF038391 | CF037312 |
| BW622862 | BW626185 | AW460118 | BG154639 | CF038391 | CF037833 |
| BW622862 | BW626197 | AW471587 | AI496396 | CF038391 | CF040263 |
| BW622862 | BW626213 | AW471623 | AI522871 | CF038391 | CF054962 |
| BW622862 | BW626214 | AW471759 | AW318141 | CF038419 | CD972328 |
| BW622862 | BW626225 | AW471761 | AI494797 | CF038419 | CD974577 |
| BW622862 | BW626231 | AW471771 | BM885271 | CF038547 | CF054396 |
| BW622862 | BW626284 | AW471835 | AW318141 | CF038547 | CF055684 |
| BW622862 | BW626289 | AW471894 | AI735945 | CF038736 | CF038709 |
| BW622862 | BW626291 | AW472034 | AW397445 | CF038757 | CD980036 |
| BW622862 | BW626317 | AW472197 | AI938326 | CF038757 | CF043461 |
| BW622862 | BW626327 | AW472225 | BM892163 | CF038773 | CD977512 |
| BW622862 | BW626333 | AW472237 | BM892192 | CF038810 | CF049059 |
| BW622862 | BW626375 | AW472395 | BG881461 | CF038850 | CF049011 |
| BW622862 | BW626402 | AW472473 | AW397445 | CF038855 | CF053423 |
| BW622862 | BW626404 | AW509353 | BF425968 | CF038898 | CF036809 |
| BW622862 | BW626409 | AW567666 | BI973152 | CF039044 | CF038097 |
| BW622862 | BW626431 | AW567681 | BG238880 | CF039044 | CF038098 |
| BW622862 | BW626456 | AW568714 | BI974148 | CF039091 | CF038248 |
| BW622862 | BW626479 | AW568730 | BE473543 | CF039105 | CD986208 |
| BW622862 | BW626484 | AW568730 | BG238645 | CF039170 | CF052556 |
| BW622862 | BW626505 | AW568749 | AW277876 | CF039173 | CF038165 |
| BW622862 | BW626524 | AW568951 | AW202097 | CF039173 | CF039797 |
| BW622862 | BW626534 | AW568962 | AW459931 | CF039173 | CF039818 |
| BW622862 | BW626539 | AW569038 | CA953049 | CF039211 | CF038248 |
| BW622862 | BW626547 | AW569297 | BM093521 | CF039221 | CF035046 |
| BW622862 | BW626593 | AW569312 | AW348731 | CF039221 | CF035834 |
| BW622862 | BW626637 | AW569352 | BI945656 | CF039221 | CF037312 |
| BW622862 | BW626647 | AW569353 | AI855591 | CF039221 | CF037833 |
| BW622862 | BW626671 | AW569353 | AI856696 | CF039221 | CF039875 |
| BW622862 | BW626697 | AW569353 | AW099007 | CF039221 | CF040263 |
| BW622862 | BW626707 | AW569353 | AW186366 | CF039221 | CF054962 |
| BW622862 | BW626722 | AW569353 | AW278610 | CF039223 | CF057670 |
| BW622862 | BW626740 | AW569353 | AW348191 | CF039241 | CD970166 |
| BW622862 | BW626744 | AW569353 | BG043162 | CF039241 | CD970781 |
| BW622862 | BW626747 | AW569353 | BG238080 | CF039326 | CD975674 |

|          |          |          |          |          |          |
|----------|----------|----------|----------|----------|----------|
| BW622862 | BW626756 | AW569367 | AW705936 | CF039328 | CF040808 |
| BW622862 | BW626794 | AW569367 | BM885719 | CF039372 | CF035776 |
| BW622862 | BW626805 | AW569384 | BG790280 | CF039372 | CF038438 |
| BW622862 | BW626827 | AW569384 | BI973156 | CF039474 | CD986208 |
| BW622862 | BW626865 | AW569412 | BM954100 | CF039552 | CF037410 |
| BW622862 | BW626880 | AW569416 | CA953049 | CF039565 | CF040808 |
| BW622862 | BW626899 | AW569524 | AW100141 | CF039590 | CF037410 |
| BW622862 | BW626914 | AW569524 | AW759325 | CF039626 | CD980417 |
| BW622862 | BW626937 | AW569647 | BI787537 | CF039626 | CD980774 |
| BW622862 | BW626978 | AW569751 | BE473543 | CF039626 | CD980835 |
| BW622862 | BW626989 | AW569763 | AW569333 | CF039626 | CD981192 |
| BW622862 | BW627034 | AW569883 | BE473543 | CF039626 | CD981266 |
| BW622862 | BW627071 | AW569899 | BI787537 | CF039626 | CD981271 |
| BW622862 | BW627095 | AW569919 | BG790963 | CF039626 | CD981285 |
| BW622862 | BW627119 | AW570023 | BI973720 | CF039665 | CF035743 |
| BW622862 | BW627147 | AW570042 | CA953216 | CF039710 | CD999736 |
| BW622862 | BW627206 | AW570042 | CA953339 | CF039726 | CF036554 |
| BW622862 | BW627215 | AW570045 | AI440801 | CF039726 | CF036809 |
| BW622862 | BW627233 | AW570045 | BE060000 | CF039801 | CF050647 |
| BW622862 | BW627243 | AW570045 | BM954271 | CF039804 | CF036575 |
| BW622862 | BW627250 | AW570045 | CA938232 | CF039928 | CF052932 |
| BW622862 | BW627278 | AW570084 | AW308769 | CF040019 | CF052022 |
| BW622862 | BW627284 | AW570084 | AW570052 | CF040157 | CF034966 |
| BW622862 | BW627285 | AW570084 | AW620700 | CF040177 | CF038248 |
| BW622862 | BW627298 | AW570084 | BG238809 | CF040245 | CF038248 |
| BW622862 | BW627307 | AW570084 | BG315848 | CF040246 | CD997744 |
| BW622862 | BW627332 | AW570084 | BG316149 | CF040246 | CF037281 |
| BW622862 | BW627368 | AW570084 | BG881325 | CF040246 | CF038623 |
| BW622862 | BW627385 | AW570084 | BM893131 | CF040246 | CF039609 |
| BW622862 | BW627389 | AW570084 | CA953397 | CF040246 | CF039634 |
| BW622862 | BW627403 | AW570086 | BM892192 | CF040246 | CF039657 |
| BW622862 | BW627406 | AW570118 | BM892192 | CF040246 | CF039762 |
| BW622862 | BW627413 | AW570118 | CA953216 | CF040246 | CF039962 |
| BW622862 | BW627462 | AW570118 | CA953339 | CF040246 | CF040190 |
| BW622862 | BW627492 | AW570136 | BG316158 | CF040246 | CF040915 |
| BW622862 | BW627497 | AW570136 | BM892192 | CF040246 | CF041631 |
| BW622862 | BW627515 | AW570136 | CA953216 | CF040246 | CF042129 |
| BW622862 | BW627527 | AW570136 | CA953339 | CF040246 | CF042291 |
| BW622862 | BW627528 | AW570203 | BM954177 | CF040246 | CF042870 |
| BW622862 | BW627556 | AW570235 | BM892192 | CF040246 | CF048500 |
| BW622862 | BW627568 | AW570451 | CA953216 | CF040246 | CF048573 |
| BW622862 | BW627570 | AW570451 | CA953339 | CF040246 | CF050230 |
| BW622862 | BW627614 | AW595924 | BG882835 | CF040246 | CF050633 |
| BW622862 | BW627632 | AW595935 | BG316158 | CF040246 | CF050785 |
| BW622862 | BW627650 | AW595935 | BM892192 | CF040246 | CF051325 |
| BW622862 | BW627697 | AW595935 | CA953216 | CF040246 | CF055264 |
| BW622862 | BW627699 | AW595939 | BI787537 | CF040246 | CF057771 |
| BW622862 | BW627714 | AW595986 | CA953216 | CF040312 | CF034044 |
| BW622862 | BW627745 | AW595986 | CA953339 | CF040352 | CF038248 |
| BW622862 | BW627773 | AW596009 | BG316158 | CF040353 | CD976069 |
| BW622862 | BW627797 | AW596025 | BG316158 | CF040369 | CD998045 |
| BW622862 | BW627811 | AW596025 | BM892192 | CF040369 | CF021645 |

|          |          |          |          |          |          |
|----------|----------|----------|----------|----------|----------|
| BW622862 | BW627822 | AW596025 | CA953216 | CF040369 | CF045363 |
| BW622862 | BW627824 | AW596110 | BG316158 | CF040369 | CF052413 |
| BW622862 | BW627874 | AW596110 | BM892192 | CF040369 | CF057043 |
| BW622862 | BW627945 | AW596110 | CA953216 | CF040382 | CF038248 |
| BW622862 | BW627980 | AW596133 | BG316158 | CF040388 | CD997711 |
| BW622862 | BW628007 | AW596133 | BM892192 | CF040388 | CF054995 |
| BW622862 | BW628026 | AW596133 | CA953216 | CF040471 | CD980417 |
| BW622862 | BW628045 | AW596149 | BM892192 | CF040471 | CD980774 |
| BW622862 | BW628071 | AW596157 | CA953216 | CF040471 | CD981192 |
| BW622862 | BW628073 | AW596157 | CA953339 | CF040471 | CD981266 |
| BW622862 | BW628114 | AW596173 | BE475077 | CF040471 | CD981285 |
| BW622862 | BW628123 | AW596176 | BM892192 | CF040473 | CF040650 |
| BW622862 | BW628143 | AW596205 | BM892192 | CF040473 | CF041562 |
| BW622862 | BW628183 | AW596215 | BG316158 | CF040494 | CF041702 |
| BW622862 | BW628185 | AW596221 | BG155568 | CF040494 | CF042222 |
| BW622862 | BW628191 | AW596249 | CA953216 | CF040494 | CF045026 |
| BW622862 | BW628224 | AW596249 | CA953339 | CF040494 | CF048125 |
| BW622862 | BW628290 | AW596263 | CA953216 | CF040494 | CF048239 |
| BW622862 | BW628315 | AW596263 | CA953339 | CF040494 | CF049091 |
| BW622862 | BW628371 | AW596272 | BM892192 | CF040494 | CF051168 |
| BW622862 | BW628381 | AW596275 | BU090814 | CF040494 | CF051256 |
| BW622862 | BW628387 | AW596353 | AI443264 | CF040494 | CF051257 |
| BW622862 | BW628392 | AW596363 | BM893275 | CF040494 | CF055196 |
| BW622862 | BW628407 | AW596383 | BG881608 | CF040494 | CF055213 |
| BW622862 | BW628454 | AW596454 | BG316158 | CF040494 | CF058044 |
| BW622862 | BW628493 | AW596454 | BM892192 | CF040555 | CD982252 |
| BW622862 | BW628508 | AW596454 | CA953216 | CF040555 | CD999822 |
| BW622862 | BW628570 | AW596473 | AI960073 | CF040583 | CF036843 |
| BW622862 | BW628594 | AW596473 | AI966221 | CF040609 | CF041595 |
| BW622862 | BW628604 | AW596473 | BE610450 | CF040778 | CF038674 |
| BW622862 | BW628613 | AW596473 | BE804557 | CF040831 | CF047947 |
| BW622862 | BW628617 | AW596473 | BF426095 | CF040846 | CD997959 |
| BW622862 | BW628631 | AW596473 | BG154911 | CF040846 | CF035144 |
| BW622862 | BW628632 | AW596473 | BG155152 | CF040846 | CF040359 |
| BW622862 | BW628646 | AW596473 | BG155456 | CF040846 | CF040530 |
| BW622862 | BW628663 | AW596473 | BG157067 | CF040846 | CF041403 |
| BW622862 | BW628708 | AW596473 | BG237075 | CF040846 | CF041809 |
| BW622862 | BW628748 | AW596473 | BI941949 | CF040846 | CF050220 |
| BW622862 | BW628751 | AW596473 | CA802377 | CF040970 | CF035214 |
| BW622862 | BW628757 | AW596473 | CA937697 | CF041003 | CD998045 |
| BW622862 | BW628771 | AW596491 | BE347164 | CF041003 | CF021645 |
| BW622862 | BW628777 | AW596491 | BG155011 | CF041003 | CF039267 |
| BW622862 | BW628785 | AW596568 | BG316158 | CF041003 | CF040331 |
| BW622862 | BW628794 | AW596568 | BM892192 | CF041003 | CF040643 |
| BW622862 | BW628796 | AW596568 | CA953216 | CF041003 | CF041142 |
| BW622862 | BW628816 | AW596593 | BM893171 | CF041003 | CF042859 |
| BW622862 | BW628822 | AW596630 | BG316158 | CF041003 | CF057043 |
| BW622862 | BW628823 | AW596630 | BM892192 | CF041060 | CD978211 |
| BW622862 | BW628826 | AW596630 | CA953216 | CF041060 | CD986942 |
| BW622862 | BW628836 | AW596652 | AW201187 | CF041060 | CF035099 |
| BW622862 | BW628842 | AW596663 | BM094734 | CF041060 | CF041232 |
| BW622862 | BW628848 | AW596676 | BG316158 | CF041079 | CF038248 |

|          |          |          |          |          |          |
|----------|----------|----------|----------|----------|----------|
| BW622862 | BW628851 | AW596676 | BM892192 | CF041123 | CF040650 |
| BW622862 | BW628876 | AW596676 | CA953216 | CF041123 | CF041562 |
| BW622862 | BW628878 | AW596690 | AW201242 | CF041143 | CF038248 |
| BW622862 | BW628921 | AW596721 | CA953216 | CF041143 | CF041474 |
| BW622862 | BW628947 | AW596721 | CA953339 | CF041229 | CF038248 |
| BW622862 | BW628986 | AW596764 | BM892192 | CF041229 | CF041474 |
| BW622862 | BW629000 | AW596764 | CA953216 | CF041422 | CF038248 |
| BW622862 | BW629009 | AW596764 | CA953339 | CF041479 | CF040650 |
| BW622862 | BW629045 | AW596932 | BM892639 | CF041479 | CF041562 |
| BW622862 | BW629055 | AW597133 | AW133005 | CF041486 | CF040650 |
| BW622862 | BW629077 | AW597202 | AI496396 | CF041486 | CF041562 |
| BW622862 | BW629081 | AW597280 | BI973152 | CF041523 | CF036460 |
| BW622862 | BW629109 | AW597337 | AW317714 | CF041523 | CF041692 |
| BW622862 | BW629126 | AW597338 | AW349901 | CF041542 | CF049792 |
| BW622862 | BW629130 | AW597344 | AI443530 | CF041580 | CD990528 |
| BW622862 | BW629145 | AW597354 | BI787691 | CF041619 | CF034958 |
| BW622862 | BW629211 | AW597368 | BE473543 | CF041619 | CF045363 |
| BW622862 | BW629225 | AW597793 | AW185919 | CF041629 | CD983112 |
| BW622862 | BW629242 | AW597839 | CB063702 | CF041629 | CF031041 |
| BW622862 | BW629259 | AW597852 | AI856288 | CF041629 | CF031277 |
| BW622862 | BW629267 | AW597852 | AI959949 | CF041629 | CF031287 |
| BW622862 | BW629273 | AW597852 | AI960073 | CF041629 | CF059932 |
| BW622862 | BW629284 | AW597852 | AI966221 | CF041630 | CF038248 |
| BW622862 | BW629315 | AW597852 | AW570368 | CF041651 | CF038575 |
| BW622862 | BW629325 | AW597852 | BE610450 | CF041657 | CF048888 |
| BW622862 | BW629345 | AW597852 | BE804557 | CF041735 | CD997896 |
| BW622862 | BW629361 | AW597852 | BF426095 | CF041735 | CF040319 |
| BW622862 | BW629423 | AW597852 | BG154911 | CF041735 | CF040335 |
| BW622862 | BW629454 | AW597852 | BG155152 | CF041735 | CF041268 |
| BW622862 | BW629467 | AW597852 | BG156603 | CF041735 | CF042174 |
| BW622862 | BW629470 | AW597852 | BG157011 | CF041735 | CF042192 |
| BW622862 | BW629473 | AW597852 | BG237075 | CF041735 | CF042209 |
| BW622862 | BW629507 | AW597852 | BI941949 | CF041735 | CF042777 |
| BW622862 | BW629508 | AW597852 | CA802377 | CF041735 | CF049256 |
| BW622862 | BW629548 | AW597852 | CA937697 | CF041735 | CF054706 |
| BW622862 | BW629552 | AW597970 | BI788090 | CF041817 | CF036843 |
| BW622862 | BW629719 | AW598011 | BM885409 | CF041839 | CD980417 |
| BW622862 | BW629728 | AW598155 | AI496396 | CF041839 | CD980606 |
| BW622862 | BW629736 | AW598155 | AI736604 | CF041839 | CD980623 |
| BW622862 | BW629764 | AW598303 | AI441271 | CF041839 | CD980774 |
| BW622862 | BW629788 | AW598303 | AI444088 | CF041839 | CD980835 |
| BW622862 | BW629796 | AW598303 | AI460420 | CF041839 | CD980983 |
| BW622862 | BW629800 | AW598303 | BE347238 | CF041839 | CD981192 |
| BW622862 | BW629809 | AW598303 | BG156270 | CF041839 | CD981266 |
| BW622862 | BW629813 | AW598303 | BI942518 | CF041839 | CD981271 |
| BW622862 | BW629866 | AW598303 | BI944123 | CF041839 | CD981285 |
| BW622862 | BW629882 | AW598303 | BI945774 | CF041877 | CF045672 |
| BW622862 | BW629929 | AW620194 | AI443374 | CF041885 | CF050165 |
| BW622862 | BW629937 | AW620201 | AW760925 | CF041897 | CF057309 |
| BW622862 | BW629964 | AW620269 | BG316158 | CF041942 | CF038935 |
| BW622862 | BW630022 | AW620269 | BM892192 | CF041950 | CD990697 |
| BW622862 | BW630030 | AW620269 | CA953216 | CF041959 | CF038248 |

|          |          |          |          |          |          |
|----------|----------|----------|----------|----------|----------|
| BW622862 | BW630074 | AW620340 | BM892192 | CF041965 | CF038248 |
| BW622862 | BW630103 | AW620368 | AW760685 | CF041995 | CD980105 |
| BW622862 | BW630118 | AW620386 | BU090814 | CF042010 | CF041840 |
| BW622862 | BW630121 | AW620390 | AI443814 | CF042010 | CF051958 |
| BW622862 | BW630151 | AW620428 | AI495703 | CF042025 | CD972411 |
| BW622862 | BW630153 | AW620433 | BM892192 | CF042025 | CF039780 |
| BW622862 | BW630154 | AW620490 | BI786168 | CF042040 | CD980417 |
| BW622862 | BW630163 | AW620495 | AW471992 | CF042040 | CD980774 |
| BW622862 | BW630173 | AW620550 | BG316158 | CF042040 | CD980835 |
| BW622862 | BW630191 | AW620550 | BM892192 | CF042040 | CD981192 |
| BW622862 | BW630213 | AW620550 | CA953216 | CF042040 | CD981266 |
| BW622862 | BW630237 | AW620550 | CA953339 | CF042040 | CD981271 |
| BW622862 | BW630290 | AW620617 | BG316158 | CF042040 | CD981285 |
| BW622862 | BW630323 | AW620617 | BM892192 | CF042070 | CD978097 |
| BW622862 | BW630325 | AW620617 | CA953216 | CF042075 | CF035295 |
| BW622862 | BW630328 | AW620617 | CA953339 | CF042087 | CF041595 |
| BW622862 | BW630358 | AW620619 | BI787537 | CF042090 | CF050165 |
| BW622862 | BW630377 | AW620664 | BG316158 | CF042093 | CF035295 |
| BW622862 | BW630402 | AW620718 | AI736952 | CF042098 | CF040707 |
| BW622862 | BW630413 | AW620765 | BG316158 | CF042098 | CF042385 |
| BW622862 | BW630437 | AW620805 | AI901134 | CF042099 | CF042360 |
| BW622862 | BW630440 | AW620805 | AW101680 | CF042105 | CF045672 |
| BW622862 | BW630463 | AW620805 | BE347515 | CF042125 | CF038248 |
| BW622862 | BW630503 | AW620805 | BE609183 | CF042131 | CF021642 |
| BW622862 | BW630510 | AW620805 | BF425898 | CF042131 | CF031600 |
| BW622862 | BW630529 | AW620805 | BG315578 | CF042137 | CF031962 |
| BW622862 | BW630551 | AW620805 | BG316195 | CF042137 | CF032062 |
| BW622862 | BW630559 | AW620805 | BU089795 | CF042137 | CF032097 |
| BW622862 | BW630563 | AW620805 | BU091102 | CF042140 | CF042336 |
| BW622862 | BW630573 | AW704599 | BI785494 | CF042145 | CD990528 |
| BW622862 | BW630574 | AW704794 | BM093435 | CF042151 | CF054995 |
| BW622862 | BW630576 | AW704878 | AI496396 | CF042156 | CF042191 |
| BW622862 | BW630587 | AW704878 | AI736604 | CF042158 | CD986208 |
| BW622862 | BW630589 | AW704918 | AW277739 | CF042158 | CF044123 |
| BW622862 | BW630600 | AW705047 | BI321177 | CF042158 | CF050130 |
| BW622862 | BW630603 | AW705085 | BI316283 | CF042215 | CF054646 |
| BW622862 | BW630629 | AW705142 | CA953216 | CF042221 | CF038248 |
| BW622862 | BW630631 | AW705142 | CA953339 | CF042237 | CD983853 |
| BW622862 | BW630637 | AW705150 | BG790949 | CF042237 | CD983860 |
| BW622862 | BW630678 | AW705170 | AW348731 | CF042237 | CD984806 |
| BW622862 | BW630679 | AW705175 | BE347400 | CF042237 | CD985216 |
| BW622862 | BW630693 | AW705179 | AI735949 | CF042237 | CD985352 |
| BW622862 | BW630717 | AW705390 | BM953861 | CF042269 | CF048475 |
| BW622862 | BW630739 | AW705490 | AW756933 | CF042304 | CD997896 |
| BW622862 | BW630754 | AW705606 | AI966082 | CF042304 | CF039434 |
| BW622862 | BW630766 | AW705606 | AW760728 | CF042304 | CF040319 |
| BW622862 | BW630769 | AW705606 | BI785659 | CF042304 | CF040335 |
| BW622862 | BW630780 | AW705606 | BM085069 | CF042304 | CF040362 |
| BW622862 | BW630799 | AW705606 | CA937819 | CF042304 | CF040511 |
| BW622862 | BW630838 | AW705618 | BI786555 | CF042304 | CF040933 |
| BW622862 | BW630840 | AW705940 | BI787520 | CF042304 | CF040972 |
| BW622862 | BW630845 | AW733778 | BI787520 | CF042304 | CF041399 |

|          |          |          |          |          |          |
|----------|----------|----------|----------|----------|----------|
| BW622862 | BW630856 | AW733788 | AI736952 | CF042304 | CF042174 |
| BW622862 | BW630860 | AW733789 | BG316158 | CF042304 | CF042192 |
| BW622862 | BW630872 | AW733789 | BM892192 | CF042304 | CF042209 |
| BW622862 | BW630918 | AW733789 | CA953216 | CF042304 | CF049256 |
| BW622862 | BW630919 | AW733803 | CA953216 | CF042304 | CF053942 |
| BW622862 | BW630926 | AW733803 | CA953339 | CF042308 | CF050191 |
| BW622862 | BW630938 | AW733822 | BG316158 | CF042327 | CF047770 |
| BW622862 | BW630940 | AW733822 | BM892192 | CF042373 | CF042100 |
| BW622862 | BW631000 | AW733822 | CA953216 | CF042427 | CF042191 |
| BW622862 | BW631009 | AW733930 | AW596103 | CF042483 | CF035023 |
| BW622862 | BW631034 | AW733949 | CA953216 | CF042729 | CF039746 |
| BW622862 | BW631044 | AW733949 | CA953339 | CF042729 | CF040792 |
| BW622862 | BW631053 | AW733951 | CA937933 | CF042729 | CF042579 |
| BW622862 | BW631144 | AW733956 | AW101727 | CF042733 | CD976250 |
| BW622862 | BW631150 | AW733956 | BF425968 | CF042735 | CD976425 |
| BW622862 | BW631162 | AW733956 | BU091074 | CF042735 | CD976691 |
| BW622862 | BW631181 | AW733956 | CA819515 | CF042735 | CD977214 |
| BW622862 | BW631215 | AW733974 | BF066470 | CF042735 | CD977599 |
| BW622862 | BW631231 | AW734058 | AW307121 | CF042735 | CD977603 |
| BW622862 | BW631232 | AW734058 | BE473730 | CF042735 | CD977701 |
| BW622862 | BW631237 | AW734058 | BE609013 | CF042735 | CD978313 |
| BW622862 | BW631252 | AW734058 | BG155994 | CF042735 | CD978767 |
| BW622862 | BW631264 | AW734058 | BG882328 | CF042735 | CD979062 |
| BW622862 | BW631343 | AW734058 | BM886122 | CF042735 | CD979092 |
| BW622862 | BW631395 | AW734064 | AW756933 | CF042735 | CD985508 |
| BW622862 | BW631399 | AW734067 | BU090873 | CF042735 | CD987027 |
| BW622862 | BW631465 | AW734239 | BF424927 | CF042735 | CD987126 |
| BW622862 | BW631501 | AW734265 | CA953216 | CF042735 | CD987775 |
| BW622862 | BW631504 | AW734265 | CA953339 | CF042735 | CD987796 |
| BW622862 | BW631509 | AW734498 | BG316158 | CF042735 | CD988029 |
| BW622862 | BW631548 | AW734498 | BM892192 | CF042735 | CF039222 |
| BW622862 | BW631560 | AW734498 | CA953216 | CF042735 | CF039614 |
| BW622862 | BW631585 | AW734503 | BG316158 | CF042836 | CF047947 |
| BW622862 | BW631591 | AW734503 | BM892192 | CF042932 | CD986275 |
| BW622862 | BW631662 | AW734503 | CA953216 | CF042932 | CD989430 |
| BW622862 | BW631685 | AW734510 | BM892192 | CF042932 | CF043989 |
| BW622862 | BW631720 | AW734522 | AW782095 | CF043079 | CD983946 |
| BW622862 | BW631722 | AW734532 | BI974439 | CF043079 | CD985078 |
| BW622862 | BW631726 | AW734538 | BM892192 | CF043274 | CF039534 |
| BW622862 | BW631740 | AW734623 | CA937978 | CF043410 | CD998758 |
| BW622862 | BW631742 | AW734637 | BM954956 | CF043486 | CF021744 |
| BW622862 | BW631748 | AW734664 | BI786555 | CF043550 | CD977654 |
| BW622862 | BW631760 | AW734735 | AI736604 | CF043597 | CF046385 |
| BW622862 | BW631782 | AW734746 | BG316158 | CF043952 | CD997927 |
| BW622862 | BW631784 | AW734746 | BM892192 | CF043952 | CF030823 |
| BW622862 | BW631788 | AW734746 | CA953216 | CF043952 | CF036141 |
| BW622862 | BW631794 | AW734747 | CA953216 | CF044068 | CD976915 |
| BW622862 | BW631821 | AW734747 | CA953339 | CF044104 | CD976911 |
| BW622862 | BW631860 | AW734763 | BG316158 | CF044104 | CF051927 |
| BW622862 | BW631868 | AW734763 | BM892192 | CF044104 | CF052130 |
| BW622862 | BW631891 | AW734763 | CA953216 | CF044104 | CF053916 |
| BW622862 | BW631924 | AW734798 | BM892192 | CF044104 | CF054995 |

|          |          |          |          |          |          |
|----------|----------|----------|----------|----------|----------|
| BW622862 | BW631939 | AW734851 | BM892192 | CF044104 | CF055154 |
| BW622862 | BW632026 | AW734863 | BG316158 | CF044413 | CF046653 |
| BW622862 | BW632059 | AW734863 | BM892192 | CF044413 | CF051489 |
| BW622862 | BW632079 | AW734863 | CA953216 | CF044431 | CD986275 |
| BW622862 | BW632089 | AW734866 | BU090873 | CF044431 | CD997211 |
| BW622862 | BW632128 | AW734867 | BF425968 | CF044434 | CD998052 |
| BW622862 | BW632161 | AW734959 | BG316158 | CF044544 | CD986275 |
| BW622862 | BW632195 | AW734959 | BM892192 | CF044544 | CD989430 |
| BW622862 | BW632251 | AW734959 | CA953216 | CF044544 | CD997211 |
| BW622862 | BW632264 | AW734987 | BG316158 | CF044544 | CF043989 |
| BW622862 | BW632276 | AW756651 | BM885049 | CF044556 | CD986275 |
| BW622862 | BW632277 | AW756696 | BG316158 | CF044556 | CD997211 |
| BW622862 | BW632306 | AW756791 | CA937729 | CF044597 | CD973189 |
| BW622862 | BW632309 | AW756805 | BM093318 | CF044815 | CD987288 |
| BW622862 | BW632310 | AW756849 | BE347060 | CF044935 | CF044095 |
| BW622862 | BW632320 | AW756961 | BM885409 | CF044935 | CF044116 |
| BW622862 | BW632400 | AW757116 | AW277739 | CF045016 | CF036304 |
| BW622862 | BW632404 | AW757215 | BM892759 | CF045468 | CD988462 |
| BW622862 | BW632462 | AW757218 | BI972761 | CF045468 | CD990625 |
| BW622862 | BW632520 | AW757221 | BM892192 | CF045468 | CD990687 |
| BW622862 | BW632537 | AW757221 | CA953216 | CF045532 | CF039117 |
| BW622862 | BW632601 | AW757221 | CA953339 | CF045693 | CD985555 |
| BW622862 | BW632605 | AW757276 | BG881461 | CF045949 | CD987288 |
| BW622862 | BW632621 | AW757322 | BI316340 | CF046073 | CD988440 |
| BW622862 | BW632622 | AW757337 | AW761570 | CF046108 | CD987269 |
| BW622862 | BW632629 | AW757337 | CA953473 | CF046108 | CD990171 |
| BW622862 | BW632636 | AW757358 | BE609261 | CF046347 | CD971578 |
| BW622862 | BW632643 | AW757392 | CA953216 | CF046347 | CD982635 |
| BW622862 | BW632663 | AW757392 | CA953339 | CF046347 | CD983017 |
| BW622862 | BW632713 | AW757396 | BG882625 | CF046347 | CD983045 |
| BW622862 | BW632722 | AW757396 | BI786492 | CF046347 | CD983162 |
| BW622862 | BW632763 | AW759007 | BG882625 | CF046347 | CF046625 |
| BW622862 | BW632787 | AW759016 | AW132844 | CF046390 | CD988462 |
| BW622862 | BW632803 | AW759016 | AW471672 | CF046390 | CD990687 |
| BW622862 | BW632807 | AW759016 | AW471798 | CF046404 | CF021916 |
| BW622862 | BW632879 | AW759016 | CA938231 | CF046404 | CF045999 |
| BW622862 | BW632891 | AW759126 | BI787537 | CF046455 | CD987219 |
| BW622862 | BW632911 | AW759223 | BI787537 | CF046455 | CD988462 |
| BW622862 | BW632919 | AW759225 | BG316158 | CF046599 | CF053715 |
| BW622862 | BW632964 | AW759225 | BM892192 | CF046625 | CD971578 |
| BW622862 | BW633015 | AW759225 | CA953216 | CF046625 | CD973197 |
| BW622862 | BW633016 | AW759263 | AW348358 | CF046625 | CD981984 |
| BW622862 | BW633031 | AW759326 | BE473703 | CF046625 | CD982031 |
| BW622862 | BW633054 | AW759334 | AW200868 | CF046625 | CD982032 |
| BW622862 | BW633078 | AW759345 | BG316158 | CF046702 | CF031174 |
| BW622862 | BW633120 | AW759345 | BM892192 | CF046702 | CF056151 |
| BW622862 | BW633150 | AW759345 | CA953216 | CF047120 | CF037170 |
| BW622862 | BW633258 | AW759346 | BF424927 | CF047120 | CF050499 |
| BW622862 | BW633287 | AW759437 | AI443814 | CF047492 | CF037170 |
| BW622862 | CB828217 | AW759637 | BF071687 | CF047492 | CF050499 |
| BW622862 | CB828256 | AW759713 | BE474255 | CF047503 | CD988462 |
| BW622862 | CB828355 | AW759779 | BM892192 | CF047503 | CD990625 |



|          |          |          |          |          |          |
|----------|----------|----------|----------|----------|----------|
| BW622862 | CB828875 | AW759779 | CA953216 | CF047503 | CD990687 |
| BW622878 | BW597308 | AW759779 | CA953339 | CF047550 | CD972629 |
| BW623002 | AW720235 | AW759787 | AI759626 | CF047550 | CD974429 |
| BW623002 | BW623088 | AW759787 | BM085281 | CF047550 | CD974729 |
| BW623002 | BW624069 | AW759822 | BM885271 | CF047550 | CD974788 |
| BW623002 | BW625056 | AW760126 | BI786127 | CF047550 | CD975126 |
| BW623002 | BW626246 | AW760151 | BG316158 | CF047550 | CF042035 |
| BW623002 | BW626580 | AW760151 | BM892192 | CF047550 | CF042456 |
| BW623002 | BW627420 | AW760151 | CA953216 | CF047550 | CF047765 |
| BW623002 | BW628365 | AW760160 | AW277739 | CF047550 | CF049536 |
| BW623002 | BW629747 | AW760163 | CA953049 | CF047550 | CF051805 |
| BW623002 | BW629958 | AW760217 | AW397594 | CF047550 | CF054039 |
| BW623002 | BW632865 | AW760259 | BM885049 | CF047550 | CF057123 |
| BW623009 | BW626925 | AW760292 | AI736604 | CF047584 | CF035892 |
| BW623018 | BW597308 | AW760320 | BG790963 | CF047639 | CF047204 |
| BW623043 | BW597308 | AW760330 | BG316158 | CF047648 | CD982252 |
| BW623250 | BW624004 | AW760330 | BM892192 | CF047648 | CD999822 |
| BW623457 | BW599651 | AW760330 | CA953216 | CF047818 | CD976359 |
| BW623457 | BW622352 | AW760342 | AI900017 | CF047818 | CD976462 |
| BW623457 | BW625134 | AW760407 | BF325153 | CF047827 | CD970829 |
| BW623457 | BW626599 | AW760488 | AW760658 | CF047827 | CD971379 |
| BW623457 | BW627709 | AW760488 | BE807027 | CF047827 | CD971447 |
| BW623457 | BW631510 | AW760488 | BE807147 | CF047931 | CF055758 |
| BW623558 | BW597308 | AW760628 | BI316576 | CF048126 | CD968197 |
| BW623565 | BW597308 | AW760669 | AI494797 | CF048126 | CD968883 |
| BW623692 | BW624004 | AW760774 | AW200752 | CF048126 | CD969081 |
| BW623692 | BW631345 | AW760775 | BI788090 | CF048126 | CD969197 |
| BW623728 | BW624004 | AW760836 | AW831236 | CF048126 | CD969247 |
| BW623728 | BW631345 | AW760922 | AW760579 | CF048126 | CD969294 |
| BW623757 | AW720235 | AW760931 | AW761368 | CF048126 | CD969492 |
| BW623757 | BW623088 | AW760970 | BI973436 | CF048126 | CD969870 |
| BW623757 | BW624069 | AW761052 | BM885271 | CF048126 | CD969930 |
| BW623757 | BW625056 | AW761100 | CA937630 | CF048126 | CD969975 |
| BW623757 | BW626246 | AW761190 | AW760925 | CF048126 | CF034375 |
| BW623757 | BW626580 | AW761234 | BU090853 | CF048284 | CD986208 |
| BW623757 | BW627420 | AW761238 | AI900331 | CF048293 | CF038248 |
| BW623757 | BW627857 | AW761238 | BF325426 | CF048357 | CF054151 |
| BW623757 | BW627947 | AW761238 | CA953228 | CF048357 | CF055674 |
| BW623757 | BW628365 | AW761244 | BG316158 | CF048428 | CF042123 |
| BW623757 | BW629747 | AW761244 | BM892192 | CF048534 | CD978769 |
| BW623757 | BW629958 | AW761244 | CA953216 | CF048587 | CF021645 |
| BW623757 | BW631019 | AW761300 | AI443234 | CF048587 | CF034958 |
| BW623757 | BW632865 | AW761300 | BI786253 | CF048587 | CF039267 |
| BW623757 | BW633225 | AW761300 | BM094546 | CF048587 | CF041142 |
| BW623757 | CB827247 | AW761300 | CA939065 | CF048587 | CF045363 |
| BW623757 | CB829655 | AW761308 | AI460661 | CF048587 | CF052413 |
| BW623824 | BW624069 | AW761308 | AW200799 | CF048603 | CF040650 |
| BW623824 | BW625056 | AW761308 | AW279533 | CF048603 | CF041562 |
| BW623824 | BW626246 | AW761308 | BF595894 | CF048617 | CD973995 |
| BW623824 | BW627420 | AW761308 | BI944146 | CF048634 | CF038072 |
| BW623824 | BW627947 | AW761369 | BI972761 | CF048652 | CD987700 |
| BW623824 | BW631019 | AW761576 | AW760925 | CF048652 | CF049198 |

|          |          |          |          |          |          |
|----------|----------|----------|----------|----------|----------|
| BW623824 | BW633225 | AW761587 | AW831635 | CF048652 | CF050341 |
| BW623824 | CB827247 | AW761587 | BE609261 | CF048652 | CF057171 |
| BW623824 | CB829655 | AW780484 | BG789960 | CF048734 | CF054225 |
| BW623837 | BW624004 | AW780496 | AW734784 | CF048751 | CF037890 |
| BW623837 | BW631345 | AW780614 | AW761368 | CF048751 | CF038730 |
| BW623843 | BW597308 | AW780684 | BG882363 | CF048751 | CF039693 |
| BW623864 | BW626925 | AW781852 | AI495004 | CF048751 | CF042607 |
| BW623874 | BW623042 | AW781869 | BI785494 | CF048751 | CF042743 |
| BW624018 | BW597308 | AW782021 | AW760120 | CF048751 | CF053296 |
| BW624040 | BW626925 | AW782021 | CA952957 | CF048751 | CF054855 |
| BW624043 | BW597308 | AW782029 | CA953049 | CF048751 | CF058043 |
| BW624047 | BW624004 | AW782099 | BM885409 | CF048751 | CF058343 |
| BW624047 | BW631345 | AW782121 | AI736604 | CF048786 | CD987496 |
| BW624082 | BW598212 | AW782146 | BM885409 | CF048786 | CF055277 |
| BW624176 | BI419485 | AW782156 | CA953049 | CF048792 | CD990256 |
| BW624255 | BW598212 | AW782209 | AW348358 | CF048795 | CF036252 |
| BW624304 | CB827094 | AW782216 | BG046896 | CF048795 | CF052656 |
| BW624351 | AW720235 | AW782251 | BU090814 | CF048813 | CF047881 |
| BW624351 | BW623088 | AW830613 | AI973618 | CF048813 | CF048035 |
| BW624351 | BW624069 | AW830658 | AI988604 | CF048813 | CF053402 |
| BW624351 | BW625056 | AW830681 | BF067121 | CF048815 | CD988284 |
| BW624351 | BW626246 | AW831115 | BU090814 | CF048815 | CF028665 |
| BW624351 | BW626580 | AW831145 | AW185393 | CF048815 | CF028869 |
| BW624351 | BW627420 | AW831235 | AW734059 | CF048815 | CF048040 |
| BW624351 | BW627947 | AW831272 | BE474932 | CF048815 | CF048778 |
| BW624351 | BW628365 | AW831295 | BM893010 | CF048815 | CF053517 |
| BW624351 | BW629747 | AW831657 | AW781828 | CF048815 | CF053662 |
| BW624351 | BW629958 | AW831751 | CA937933 | CF048815 | CF055242 |
| BW624351 | BW631019 | AW831770 | AW185393 | CF048815 | CF055391 |
| BW624351 | BW632865 | AW831772 | BI972604 | CF048815 | CF055724 |
| BW624351 | BW633225 | AW832004 | AW099698 | CF048815 | CF058051 |
| BW624351 | CB827247 | AW832004 | AW760120 | CF048832 | CF048731 |
| BW624351 | CB829655 | AW832004 | BF010248 | CF048847 | CD970280 |
| BW624371 | BW621832 | AW832004 | BF068747 | CF048847 | CF036412 |
| BW624371 | BW625472 | AW832004 | BF070483 | CF048847 | CF048012 |
| BW624371 | BW627400 | AW832004 | BF424375 | CF048847 | CF048147 |
| BW624416 | BW628977 | AW832004 | BG881619 | CF048847 | CF048343 |
| BW624501 | BW624004 | AW832004 | BM893138 | CF048847 | CF050158 |
| BW624501 | BW631345 | AW832004 | CA952957 | CF048847 | CF050202 |
| BW624676 | BW621391 | AW832096 | AW620209 | CF048894 | CD998036 |
| BW624676 | BW624164 | AW832164 | AW201289 | CF048935 | CF039694 |
| BW624676 | BW625078 | AW832164 | CA938101 | CF048950 | CF038993 |
| BW624676 | BW627314 | AW832231 | BI787537 | CF048950 | CF039274 |
| BW624676 | BW628557 | AW832313 | CA938183 | CF048950 | CF053573 |
| BW624966 | CB829013 | AW832356 | AW761368 | CF048963 | CF040542 |
| BW624969 | BW597308 | AW832387 | BG316158 | CF049074 | CF052966 |
| BW624972 | CB829655 | AW832387 | BM892192 | CF049074 | CF053195 |
| BW625061 | BW631440 | AW832387 | CA953216 | CF049074 | CF053210 |
| BW625120 | BW630253 | AW832452 | AI495004 | CF049111 | CF038248 |
| BW625152 | BW624004 | AW832623 | BG882363 | CF049132 | CF038405 |
| BW625152 | BW631345 | AW832646 | AW596199 | CF049132 | CF038586 |
| BW625207 | BW624004 | AW832646 | BE807565 | CF049132 | CF038867 |

|          |          |          |          |          |          |
|----------|----------|----------|----------|----------|----------|
| BW625207 | BW631345 | BE059944 | BG881338 | CF049132 | CF040335 |
| BW625229 | BW598212 | BE059956 | BM892192 | CF049132 | CF040933 |
| BW625250 | BW596408 | BE059956 | CA953216 | CF049132 | CF041069 |
| BW625250 | BW597669 | BE059956 | CA953339 | CF049132 | CF042209 |
| BW625332 | BW597308 | BE059979 | AI973742 | CF049132 | CF042285 |
| BW625339 | BI418433 | BE059982 | BM094734 | CF049132 | CF049256 |
| BW625339 | BW596805 | BE190160 | BG316158 | CF049157 | CD973331 |
| BW625339 | BW621990 | BE190160 | BM892192 | CF049157 | CD985579 |
| BW625339 | BW623362 | BE190160 | CA953216 | CF049157 | CD988747 |
| BW625339 | BW623420 | BE190203 | BF425968 | CF049157 | CD997840 |
| BW625339 | BW623486 | BE190211 | BM892192 | CF049165 | CF042408 |
| BW625339 | BW624732 | BE190229 | AW832146 | CF049231 | CD980448 |
| BW625339 | BW625045 | BE190237 | BG316158 | CF049231 | CF055427 |
| BW625339 | BW625350 | BE190237 | BM892192 | CF049284 | CF034424 |
| BW625339 | BW625443 | BE190237 | CA953216 | CF049284 | CF049175 |
| BW625339 | BW625470 | BE190286 | AW101813 | CF049291 | CF051899 |
| BW625339 | BW625655 | BE190304 | BG155056 | CF049313 | CF040650 |
| BW625339 | BW625726 | BE190359 | BG316158 | CF049313 | CF041562 |
| BW625339 | BW626589 | BE190359 | BM892192 | CF049374 | CF041474 |
| BW625339 | BW627090 | BE190359 | CA953216 | CF049397 | CD985522 |
| BW625339 | BW627263 | BE190359 | CA953339 | CF049425 | CF037354 |
| BW625339 | BW628489 | BE190366 | BG238673 | CF049426 | CF050539 |
| BW625339 | BW628517 | BE190376 | BM732023 | CF049463 | CF038057 |
| BW625339 | BW629669 | BE190378 | CA953232 | CF049463 | CF053532 |
| BW625339 | BW629893 | BE330730 | AI443733 | CF049507 | CF040808 |
| BW625339 | BW630128 | BE330741 | BF596179 | CF049522 | CF059478 |
| BW625339 | BW630361 | BE330756 | BM954956 | CF049522 | CF060290 |
| BW625339 | BW630412 | BE330758 | BM893263 | CF049534 | CF038470 |
| BW625339 | BW631247 | BE330823 | BM893263 | CF049583 | CF036939 |
| BW625339 | BW632344 | BE330836 | BM892192 | CF049595 | CF041887 |
| BW625339 | BW632386 | BE330836 | CA953216 | CF049595 | CF054773 |
| BW625339 | BW632436 | BE330836 | CA953339 | CF049610 | CD990181 |
| BW625339 | BW632594 | BE330861 | BM891944 | CF049610 | CF042347 |
| BW625339 | BW632654 | BE330909 | BM893263 | CF049610 | CF049993 |
| BW625339 | BW632725 | BE330918 | BM893263 | CF049610 | CF056007 |
| BW625339 | BW632752 | BE330927 | BG316158 | CF049610 | CF057806 |
| BW625339 | BW632806 | BE330927 | BM892192 | CF049610 | CF058082 |
| BW625339 | BW632881 | BE330927 | CA953216 | CF049617 | CD997934 |
| BW625339 | BW633085 | BE330932 | BG157047 | CF049617 | CF041006 |
| BW625339 | BW633106 | BE330997 | BM892192 | CF049617 | CF042128 |
| BW625339 | BW633159 | BE331000 | BM893263 | CF049617 | CF047599 |
| BW625339 | BW633191 | BE331053 | BG316158 | CF049617 | CF049000 |
| BW625339 | CN825585 | BE331053 | BM892192 | CF049617 | CF053623 |
| BW625339 | CN825715 | BE331053 | CA953216 | CF049617 | CF054357 |
| BW625342 | BU494368 | BE331099 | BG238452 | CF049693 | CF041599 |
| BW625407 | BW626925 | BE331102 | BM893263 | CF049693 | CF050481 |
| BW625528 | BW624004 | BE331117 | BM094734 | CF049858 | CF038248 |
| BW625545 | BW626925 | BE331123 | CA938242 | CF049863 | CF040365 |
| BW625548 | BW628977 | BE331161 | BM954812 | CF049863 | CF043905 |
| BW625643 | BW626925 | BE331167 | CA953049 | CF049863 | CF048435 |
| BW625669 | BW621354 | BE331307 | CA937978 | CF049863 | CF048613 |
| BW625770 | BW597308 | BE331315 | BE347607 | CF049863 | CF048999 |

|          |          |          |          |          |          |
|----------|----------|----------|----------|----------|----------|
| BW625836 | BW597308 | BE331315 | BM092969 | CF049863 | CF050676 |
| BW625901 | BW626925 | BE331348 | BG154691 | CF049863 | CF053112 |
| BW625950 | AI967737 | BE331351 | BE330839 | CF049863 | CF053127 |
| BW625950 | AW428714 | BE331375 | CA953216 | CF049863 | CF053153 |
| BW625950 | AW720559 | BE331375 | CA953339 | CF049863 | CF053541 |
| BW625950 | BF177634 | BE346950 | AW757289 | CF049863 | CF053866 |
| BW625950 | BI417217 | BE346979 | BG316158 | CF049863 | CF055439 |
| BW625950 | BI417255 | BE346979 | BM892192 | CF049863 | CF057244 |
| BW625950 | BI417299 | BE346979 | CA953216 | CF049863 | CF058061 |
| BW625950 | BI417314 | BE347019 | AW185393 | CF049894 | CF051223 |
| BW625950 | BI417338 | BE347044 | AI522871 | CF049924 | CD978233 |
| BW625950 | BI417429 | BE347044 | AW471514 | CF049924 | CF047030 |
| BW625950 | BI417444 | BE347044 | AW472423 | CF049924 | CF047184 |
| BW625950 | BI417461 | BE347044 | BI316391 | CF049924 | CF047212 |
| BW625950 | BI417480 | BE347056 | AW201242 | CF049924 | CF047247 |
| BW625950 | BI417484 | BE347153 | BF425675 | CF049924 | CF047443 |
| BW625950 | BI417597 | BE347179 | AW318222 | CF050003 | CF054151 |
| BW625950 | BI417765 | BE347235 | BI974262 | CF050003 | CF055674 |
| BW625950 | BI417890 | BE347248 | BI787520 | CF050046 | CD968197 |
| BW625950 | BI418024 | BE347293 | BI316283 | CF050046 | CD968387 |
| BW625950 | BI418104 | BE347299 | AI937992 | CF050046 | CD968816 |
| BW625950 | BI418286 | BE347373 | AW760925 | CF050046 | CD968883 |
| BW625950 | BI418358 | BE347622 | AW101813 | CF050046 | CD969081 |
| BW625950 | BI418430 | BE347667 | BI787428 | CF050046 | CD969118 |
| BW625950 | BI418477 | BE347689 | BG882625 | CF050046 | CD969197 |
| BW625950 | BI418479 | BE347689 | BI786492 | CF050046 | CD969247 |
| BW625950 | BI418496 | BE347711 | AI736604 | CF050046 | CD969294 |
| BW625950 | BI418518 | BE347717 | BM893263 | CF050046 | CD969334 |
| BW625950 | BI418555 | BE347727 | BG316158 | CF050046 | CD969492 |
| BW625950 | BI418629 | BE347727 | BM892192 | CF050046 | CD969661 |
| BW625950 | BI418641 | BE347727 | CA953216 | CF050046 | CD969745 |
| BW625950 | BI418709 | BE347727 | CA953339 | CF050046 | CD969870 |
| BW625950 | BI418723 | BE347732 | AW132360 | CF050046 | CD969930 |
| BW625950 | BI418829 | BE347732 | BF324373 | CF050046 | CD969975 |
| BW625950 | BI418888 | BE347739 | BM893263 | CF050235 | CD988462 |
| BW625950 | BI418890 | BE347757 | AI748322 | CF050280 | CF038248 |
| BW625950 | BI418897 | BE347758 | BM893263 | CF050388 | CF038586 |
| BW625950 | BI418904 | BE347795 | BG316158 | CF050388 | CF042192 |
| BW625950 | BI419272 | BE347795 | BM892192 | CF050388 | CF042285 |
| BW625950 | BI419348 | BE347795 | CA953216 | CF050431 | CD968420 |
| BW625950 | BI419443 | BE347805 | BE474055 | CF050431 | CD969302 |
| BW625950 | BI419552 | BE347821 | AI441281 | CF050431 | CD969868 |
| BW625950 | BI419557 | BE347821 | BM095020 | CF050431 | CD969903 |
| BW625950 | BI419605 | BE347836 | CA953049 | CF050431 | CD969911 |
| BW625950 | BI419712 | BE347892 | AI973947 | CF050431 | CD982872 |
| BW625950 | BI419793 | BE347916 | BG882625 | CF050431 | CD999248 |
| BW625950 | BI419802 | BE347926 | BI787428 | CF050495 | CF041822 |
| BW625950 | BI419898 | BE440283 | BI320434 | CF050495 | CF045232 |
| BW625950 | BI419899 | BE440291 | AW278111 | CF050543 | CD985573 |
| BW625950 | BI419901 | BE440378 | BG881608 | CF050717 | CD990643 |
| BW625950 | BI419903 | BE440424 | BM732780 | CF050717 | CF038094 |
| BW625950 | BI419920 | BE440502 | BF425037 | CF050717 | CF042756 |

|          |          |          |          |          |          |
|----------|----------|----------|----------|----------|----------|
| BW625950 | BI419922 | BE440600 | AW760925 | CF050717 | CF048543 |
| BW625950 | BI420009 | BE440644 | BM732780 | CF050717 | CF048984 |
| BW625950 | BI420116 | BE440677 | BI787537 | CF050717 | CF054147 |
| BW625950 | BI420144 | BE440682 | BE190295 | CF050717 | CF054497 |
| BW625950 | BI420150 | BE440734 | BI316340 | CF050717 | CF056179 |
| BW625950 | BI420230 | BE440874 | CA937760 | CF050732 | CD975523 |
| BW625950 | BI420729 | BE440879 | CA953216 | CF051072 | CF040808 |
| BW625950 | BI420896 | BE440879 | CA953339 | CF051153 | CD979068 |
| BW625950 | BI420909 | BE440893 | BG316158 | CF051153 | CF029967 |
| BW625950 | BP058563 | BE440893 | BM892192 | CF051153 | CF030247 |
| BW625950 | BP071749 | BE440893 | CA953216 | CF051153 | CF030617 |
| BW625950 | BW596472 | BE440893 | CA953339 | CF051153 | CF030656 |
| BW625950 | BW621390 | BE440905 | BI787537 | CF051153 | CF031070 |
| BW625950 | BW621409 | BE440933 | AW185728 | CF051153 | CF031163 |
| BW625950 | BW621416 | BE473423 | BG882363 | CF051153 | CF031665 |
| BW625950 | BW621420 | BE473549 | BM885049 | CF051153 | CF044691 |
| BW625950 | BW621432 | BE473619 | BE473543 | CF051153 | CF051915 |
| BW625950 | BW621457 | BE473681 | BE473543 | CF051298 | CD996556 |
| BW625950 | BW621462 | BE473701 | BI787537 | CF051314 | CF037336 |
| BW625950 | BW621517 | BE473728 | BI787537 | CF051314 | CF038305 |
| BW625950 | BW621541 | BE473748 | BM954204 | CF051426 | CF040808 |
| BW625950 | BW621570 | BE473776 | CA953216 | CF051635 | CF059478 |
| BW625950 | BW621659 | BE473776 | CA953339 | CF051635 | CF060290 |
| BW625950 | BW621734 | BE473805 | BI787537 | CF051669 | CF035076 |
| BW625950 | BW621752 | BE473826 | AW099698 | CF051669 | CF035599 |
| BW625950 | BW621775 | BE473826 | AW760120 | CF051669 | CF036301 |
| BW625950 | BW621942 | BE473826 | BF010248 | CF051673 | CF056849 |
| BW625950 | BW621960 | BE473826 | BF070483 | CF051698 | CF042275 |
| BW625950 | BW621988 | BE473826 | BF071687 | CF051740 | CF052519 |
| BW625950 | BW622005 | BE473826 | BF424375 | CF051740 | CF054483 |
| BW625950 | BW622021 | BE473826 | BM893138 | CF051753 | CD973860 |
| BW625950 | BW622251 | BE473853 | BU090814 | CF051753 | CD975224 |
| BW625950 | BW622286 | BE473904 | AW186378 | CF051753 | CD977169 |
| BW625950 | BW622403 | BE473904 | AW277405 | CF051753 | CD977645 |
| BW625950 | BW622430 | BE473904 | AW277568 | CF051753 | CD985838 |
| BW625950 | BW622453 | BE473904 | AW278285 | CF051753 | CD986363 |
| BW625950 | BW622473 | BE473904 | AW395661 | CF051753 | CF033055 |
| BW625950 | BW622479 | BE473904 | AW704443 | CF051753 | CF033103 |
| BW625950 | BW622487 | BE473904 | BE440676 | CF051753 | CF033310 |
| BW625950 | BW622510 | BE473904 | BI785456 | CF051753 | CF033501 |
| BW625950 | BW622520 | BE473904 | BI787474 | CF051753 | CF033924 |
| BW625950 | BW622560 | BE473904 | CA803070 | CF051753 | CF034022 |
| BW625950 | BW622604 | BE473951 | AI736357 | CF051753 | CF039401 |
| BW625950 | BW622657 | BE474124 | AW781849 | CF051753 | CF047631 |
| BW625950 | BW622666 | BE474124 | BG882195 | CF051753 | CF048242 |
| BW625950 | BW622722 | BE474124 | BI426369 | CF051753 | CF048669 |
| BW625950 | BW622856 | BE474124 | BM094818 | CF051753 | CF048772 |
| BW625950 | BW622899 | BE474124 | BM892511 | CF051753 | CF049314 |
| BW625950 | BW622918 | BE474173 | AI496396 | CF051753 | CF049455 |
| BW625950 | BW622969 | BE474173 | AI901200 | CF051753 | CF049650 |
| BW625950 | BW622984 | BE474311 | AI736604 | CF051753 | CF049973 |
| BW625950 | BW623021 | BE474311 | AI901200 | CF051753 | CF050118 |

|          |          |          |          |          |          |
|----------|----------|----------|----------|----------|----------|
| BW625950 | BW623036 | BE474346 | BM731706 | CF051753 | CF051073 |
| BW625950 | BW623104 | BE474354 | BF009312 | CF051753 | CF051144 |
| BW625950 | BW623146 | BE474371 | BF424927 | CF051753 | CF051353 |
| BW625950 | BW623239 | BE474443 | BG882833 | CF051753 | CF051668 |
| BW625950 | BW623258 | BE474574 | CA953049 | CF051753 | CF052027 |
| BW625950 | BW623327 | BE474617 | BE473707 | CF051753 | CF052549 |
| BW625950 | BW623391 | BE474619 | AI443733 | CF051753 | CF052853 |
| BW625950 | BW623515 | BE474688 | AI496396 | CF051753 | CF053032 |
| BW625950 | BW623525 | BE474688 | AI901200 | CF051753 | CF053207 |
| BW625950 | BW623551 | BE474757 | BF009312 | CF051753 | CF053367 |
| BW625950 | BW623732 | BE474855 | AW307388 | CF051753 | CF053412 |
| BW625950 | BW623775 | BE474855 | BE474883 | CF051753 | CF053625 |
| BW625950 | BW623863 | BE474855 | BE474911 | CF051753 | CF053843 |
| BW625950 | BW623929 | BE474855 | BI943756 | CF051753 | CF054153 |
| BW625950 | BW624081 | BE474883 | BI973720 | CF051753 | CF054423 |
| BW625950 | BW624109 | BE474951 | AW099989 | CF051753 | CF055106 |
| BW625950 | BW624115 | BE474951 | AW185910 | CF051811 | CD970021 |
| BW625950 | BW624218 | BE474951 | AW186364 | CF051811 | CD970453 |
| BW625950 | BW624404 | BE474951 | AW277405 | CF051811 | CF035053 |
| BW625950 | BW624464 | BE474951 | AW278285 | CF051811 | CF036044 |
| BW625950 | BW624506 | BE474951 | AW309133 | CF051811 | CF036423 |
| BW625950 | BW624508 | BE474951 | AW349666 | CF051811 | CF037304 |
| BW625950 | BW624556 | BE474951 | AW569009 | CF051811 | CF038871 |
| BW625950 | BW624620 | BE474951 | AW704435 | CF051811 | CF039027 |
| BW625950 | BW624644 | BE474951 | AW704443 | CF051811 | CF039325 |
| BW625950 | BW624660 | BE474951 | AW704980 | CF051811 | CF039673 |
| BW625950 | BW624717 | BE474951 | BE440676 | CF051811 | CF039905 |
| BW625950 | BW624820 | BE474951 | BG237005 | CF051811 | CF040092 |
| BW625950 | BW624824 | BE474951 | BI316463 | CF051811 | CF050694 |
| BW625950 | BW624848 | BE474951 | BI972426 | CF051811 | CF051312 |
| BW625950 | BW624874 | BE474951 | BI973265 | CF051811 | CF051723 |
| BW625950 | BW624977 | BE474951 | BM885709 | CF051811 | CF052103 |
| BW625950 | BW625030 | BE474951 | CA803070 | CF051811 | CF054028 |
| BW625950 | BW625161 | BE475064 | AW620371 | CF051811 | CF056052 |
| BW625950 | BW625164 | BE475124 | AI442405 | CF051811 | CF056565 |
| BW625950 | BW625457 | BE475124 | AI443199 | CF051816 | CF044344 |
| BW625950 | BW625613 | BE475124 | AI443732 | CF051883 | CF052521 |
| BW625950 | BW625638 | BE475124 | BG790403 | CF051925 | CF041702 |
| BW625950 | BW625759 | BE475124 | BM893482 | CF051925 | CF045026 |
| BW625950 | BW625953 | BE475150 | AI748322 | CF051925 | CF048125 |
| BW625950 | BW626207 | BE475163 | AI443191 | CF051925 | CF049091 |
| BW625950 | BW626343 | BE475341 | BG789482 | CF051925 | CF051168 |
| BW625950 | BW626361 | BE475547 | BG882625 | CF051925 | CF051257 |
| BW625950 | BW626397 | BE475547 | BI786492 | CF051925 | CF055213 |
| BW625950 | BW626416 | BE475645 | BG046882 | CF051925 | CF058044 |
| BW625950 | BW626426 | BE608475 | BI787520 | CF052026 | CD986294 |
| BW625950 | BW626449 | BE608481 | AI496396 | CF052026 | CD988905 |
| BW625950 | BW626455 | BE608481 | AI736604 | CF052026 | CD989518 |
| BW625950 | BW626459 | BE608751 | CA819043 | CF052026 | CD989625 |
| BW625950 | BW626501 | BE608793 | CA953216 | CF052026 | CF043358 |
| BW625950 | BW626566 | BE608793 | CA953339 | CF052026 | CF047594 |
| BW625950 | BW626576 | BE608821 | AI794922 | CF052026 | CF050339 |

|          |          |          |          |          |          |
|----------|----------|----------|----------|----------|----------|
| BW625950 | BW626672 | BE608850 | BF425037 | CF052026 | CF055303 |
| BW625950 | BW626748 | BE608863 | AW278111 | CF052099 | CF038867 |
| BW625950 | BW627011 | BE608895 | BU090814 | CF052099 | CF049059 |
| BW625950 | BW627038 | BE608896 | BM892192 | CF052099 | CF054706 |
| BW625950 | BW627053 | BE608906 | BG316158 | CF052147 | CF057866 |
| BW625950 | BW627153 | BE608906 | BM892192 | CF052153 | CD973535 |
| BW625950 | BW627308 | BE608906 | CA953216 | CF052153 | CD986940 |
| BW625950 | BW627339 | BE608906 | CA953339 | CF052153 | CD989697 |
| BW625950 | BW627362 | BE608919 | BG316158 | CF052153 | CD998752 |
| BW625950 | BW627461 | BE608919 | BM892192 | CF052153 | CF037121 |
| BW625950 | BW627481 | BE608919 | CA953216 | CF052153 | CF039982 |
| BW625950 | BW627605 | BE608919 | CA953339 | CF052153 | CF042724 |
| BW625950 | BW627677 | BE608947 | BF325153 | CF052153 | CF047681 |
| BW625950 | BW627700 | BE608963 | BM892192 | CF052153 | CF048173 |
| BW625950 | BW627717 | BE609036 | BM892639 | CF052153 | CF049131 |
| BW625950 | BW627722 | BE609080 | BI972604 | CF052153 | CF049557 |
| BW625950 | BW627800 | BE609149 | BM893084 | CF052153 | CF051371 |
| BW625950 | BW627829 | BE609158 | BM893084 | CF052153 | CF054264 |
| BW625950 | BW627894 | BE609160 | BG316158 | CF052206 | CF055367 |
| BW625950 | BW627924 | BE609160 | BM892192 | CF052251 | CD974903 |
| BW625950 | BW628099 | BE609160 | CA953216 | CF052251 | CD999038 |
| BW625950 | BW628164 | BE609161 | BG316158 | CF052251 | CF038504 |
| BW625950 | BW628180 | BE609161 | BM892192 | CF052251 | CF044905 |
| BW625950 | BW628205 | BE609161 | CA953216 | CF052306 | CD975624 |
| BW625950 | BW628213 | BE609182 | BM892192 | CF052306 | CD979975 |
| BW625950 | BW628218 | BE609183 | BF010310 | CF052306 | CF035981 |
| BW625950 | BW628291 | BE609191 | BG316158 | CF052306 | CF037944 |
| BW625950 | BW628550 | BE609291 | BU090814 | CF052306 | CF038682 |
| BW625950 | BW628614 | BE609395 | BM892846 | CF052306 | CF039589 |
| BW625950 | BW628652 | BE609398 | BM892192 | CF052306 | CF050079 |
| BW625950 | BW628712 | BE609402 | AW201956 | CF052306 | CF050407 |
| BW625950 | BW628754 | BE609428 | BI320434 | CF052306 | CF051274 |
| BW625950 | BW628791 | BE609432 | AW100861 | CF052306 | CF052449 |
| BW625950 | BW628868 | BE609443 | BE609279 | CF052306 | CF053220 |
| BW625950 | BW628893 | BE609462 | CA819043 | CF052306 | CF055920 |
| BW625950 | BW628904 | BE609472 | AW596680 | CF052306 | CF056003 |
| BW625950 | BW628963 | BE609921 | AW596680 | CF052306 | CF056946 |
| BW625950 | BW629011 | BE610059 | AI438000 | CF052356 | CD997533 |
| BW625950 | BW629070 | BE610059 | AW201341 | CF052385 | CF045388 |
| BW625950 | BW629139 | BE610059 | AW758994 | CF052385 | CF046500 |
| BW625950 | BW629157 | BE610059 | AW761188 | CF052429 | CD987841 |
| BW625950 | BW629192 | BE610059 | AW780498 | CF052429 | CD988590 |
| BW625950 | BW629234 | BE610059 | AW782128 | CF052429 | CD989958 |
| BW625950 | BW629309 | BE610059 | BF424934 | CF052429 | CF033075 |
| BW625950 | BW629328 | BE610059 | BG316352 | CF052429 | CF047862 |
| BW625950 | BW629381 | BE610080 | AI443733 | CF052429 | CF048458 |
| BW625950 | BW629478 | BE610296 | AW734059 | CF052429 | CF049861 |
| BW625950 | BW629543 | BE610307 | CB063702 | CF052429 | CF050657 |
| BW625950 | BW629595 | BE610414 | AI495703 | CF052429 | CF050668 |
| BW625950 | BW629790 | BE804729 | BF425968 | CF052429 | CF051391 |
| BW625950 | BW629797 | BE806908 | AW831264 | CF052429 | CF052491 |
| BW625950 | BW629832 | BE806940 | BG157353 | CF052429 | CF053303 |

|          |          |          |          |          |          |
|----------|----------|----------|----------|----------|----------|
| BW625950 | BW629840 | BE806945 | AW133055 | CF052429 | CF053954 |
| BW625950 | BW629855 | BE806945 | AW279166 | CF052429 | CF056124 |
| BW625950 | BW630016 | BE806945 | BI943813 | CF052469 | CF036129 |
| BW625950 | BW630044 | BE806950 | BM095020 | CF052469 | CF051717 |
| BW625950 | BW630051 | BE807012 | BI471651 | CF052554 | CF050647 |
| BW625950 | BW630062 | BE807053 | BG316158 | CF052652 | CD975872 |
| BW625950 | BW630078 | BE807092 | AI736250 | CF052652 | CD977634 |
| BW625950 | BW630080 | BE807092 | CA819595 | CF052689 | CF037521 |
| BW625950 | BW630168 | BE807121 | BF596056 | CF052808 | CF032209 |
| BW625950 | BW630316 | BE807148 | BG155568 | CF052808 | CF032377 |
| BW625950 | BW630330 | BE807180 | BF425968 | CF052808 | CF032453 |
| BW625950 | BW630359 | BE807192 | BG316158 | CF052808 | CF032631 |
| BW625950 | BW630373 | BE807192 | BM892192 | CF052808 | CF039546 |
| BW625950 | BW630403 | BE807192 | CA953216 | CF052817 | CF037852 |
| BW625950 | BW630616 | BE807193 | BG316158 | CF052817 | CF038405 |
| BW625950 | BW630638 | BE807193 | BM892192 | CF052817 | CF039434 |
| BW625950 | BW630788 | BE807193 | CA953216 | CF052817 | CF040933 |
| BW625950 | BW631124 | BE807226 | BF425968 | CF052817 | CF041069 |
| BW625950 | BW631138 | BE807259 | BU090814 | CF052817 | CF041924 |
| BW625950 | BW631194 | BE807278 | BG316158 | CF052817 | CF042285 |
| BW625950 | BW631218 | BE807278 | BM892192 | CF052817 | CF042777 |
| BW625950 | BW631254 | BE807278 | CA953216 | CF052817 | CF048283 |
| BW625950 | BW631262 | BE807278 | CA953339 | CF052817 | CF049256 |
| BW625950 | BW631265 | BE807504 | CA953216 | CF052817 | CF053942 |
| BW625950 | BW631293 | BE807504 | CA953339 | CF052948 | CD985555 |
| BW625950 | BW631377 | BF008743 | BF009312 | CF053006 | CD985573 |
| BW625950 | BW631391 | BF009265 | BG882363 | CF053142 | CD979289 |
| BW625950 | BW631434 | BF009295 | AW201780 | CF053369 | CF038187 |
| BW625950 | BW631470 | BF009295 | AW396842 | CF053503 | CF051530 |
| BW625950 | BW631542 | BF009295 | AW705293 | CF053539 | CF038248 |
| BW625950 | BW631546 | BF009295 | BM891986 | CF053551 | CF036004 |
| BW625950 | BW631570 | BF009295 | BM892813 | CF053796 | CD997808 |
| BW625950 | BW631616 | BF009295 | BM954976 | CF053833 | CF042338 |
| BW625950 | BW631695 | BF009295 | BM955097 | CF053833 | CF043334 |
| BW625950 | BW631734 | BF009295 | CA953066 | CF053833 | CF048036 |
| BW625950 | BW631839 | BF009342 | BG881461 | CF053833 | CF049597 |
| BW625950 | BW631893 | BF009375 | AW569333 | CF053833 | CF050379 |
| BW625950 | BW631946 | BF009404 | BG239509 | CF053833 | CF053599 |
| BW625950 | BW632040 | BF009424 | AI901200 | CF053833 | CF055031 |
| BW625950 | BW632065 | BF009426 | BG047469 | CF053833 | CF055472 |
| BW625950 | BW632091 | BF009433 | BF071559 | CF053833 | CF055698 |
| BW625950 | BW632109 | BF009433 | BI786126 | CF053833 | CF055847 |
| BW625950 | BW632141 | BF009463 | AI437897 | CF053833 | CF056507 |
| BW625950 | BW632164 | BF009478 | AI495116 | CF053833 | CF056705 |
| BW625950 | BW632248 | BF009493 | AW278111 | CF053917 | CD971711 |
| BW625950 | BW632286 | BF009494 | AI443496 | CF053917 | CD971952 |
| BW625950 | BW632593 | BF009494 | AI496601 | CF053917 | CD973622 |
| BW625950 | BW632637 | BF009495 | AW132573 | CF053917 | CD973870 |
| BW625950 | BW632711 | BF009495 | AW782206 | CF053917 | CD974468 |
| BW625950 | BW632771 | BF009500 | AW596488 | CF053917 | CD974563 |
| BW625950 | BW632777 | BF009723 | AW351003 | CF053917 | CD975189 |
| BW625950 | BW632798 | BF009925 | AW760096 | CF053917 | CD975645 |



|          |          |          |          |          |          |
|----------|----------|----------|----------|----------|----------|
| BW625950 | BW632839 | BF010026 | AW348731 | CF053917 | CF055683 |
| BW625950 | BW632883 | BF010065 | CA819488 | CF053925 | CD972629 |
| BW625950 | BW632884 | BF010154 | AW308980 | CF053925 | CD973607 |
| BW625950 | BW632954 | BF010196 | AW620778 | CF053925 | CD974429 |
| BW625950 | BW632977 | BF010198 | BI787520 | CF053925 | CD974729 |
| BW625950 | BW633168 | BF010219 | AI441638 | CF053925 | CD974788 |
| BW625950 | BW633196 | BF010265 | AI441749 | CF053925 | CD974905 |
| BW625950 | BW633229 | BF010265 | AI441953 | CF053925 | CD975126 |
| BW625950 | CB827551 | BF010265 | AI494728 | CF053925 | CD997588 |
| BW625950 | CB827721 | BF010265 | BE474504 | CF053925 | CF039413 |
| BW625950 | CB828007 | BF010370 | AW100167 | CF053925 | CF040700 |
| BW625950 | CB828816 | BF010375 | BM885238 | CF053925 | CF042035 |
| BW625950 | CB829327 | BF010397 | AI495575 | CF053925 | CF042456 |
| BW625950 | CN825246 | BF010397 | AW278287 | CF053925 | CF047765 |
| BW625950 | CN825480 | BF010397 | BF424462 | CF053925 | CF049536 |
| BW625997 | BW624004 | BF066162 | AW350570 | CF053925 | CF051805 |
| BW626037 | BW597308 | BF066162 | BF425315 | CF053925 | CF053128 |
| BW626122 | BW630253 | BF066219 | AI959773 | CF053925 | CF054039 |
| BW626169 | AU088867 | BF066368 | BG881608 | CF053925 | CF057123 |
| BW626169 | BI417762 | BF066699 | CB063702 | CF053977 | CF049001 |
| BW626169 | BI420899 | BF066733 | AI494968 | CF054003 | CF038072 |
| BW626169 | BW621598 | BF067139 | AI973742 | CF054034 | CD972022 |
| BW626169 | BW622291 | BF068714 | AI736632 | CF054034 | CD972794 |
| BW626169 | BW622512 | BF068714 | AW277538 | CF054034 | CD989600 |
| BW626169 | BW622564 | BF068745 | AW278111 | CF054034 | CD998172 |
| BW626169 | BW622688 | BF068777 | BM891834 | CF054034 | CF038479 |
| BW626169 | BW623128 | BF068862 | BI786287 | CF054034 | CF038501 |
| BW626169 | BW623145 | BF068862 | BI973818 | CF054034 | CF041011 |
| BW626169 | BW623415 | BF068864 | BI974368 | CF054034 | CF041195 |
| BW626169 | BW623470 | BF068876 | BE473548 | CF054034 | CF041570 |
| BW626169 | BW623504 | BF068971 | BM093344 | CF054034 | CF042064 |
| BW626169 | BW623681 | BF069006 | BI787428 | CF054034 | CF042328 |
| BW626169 | BW624562 | BF069006 | CB063831 | CF054034 | CF042512 |
| BW626169 | BW625448 | BF070116 | CA938813 | CF054034 | CF042569 |
| BW626169 | BW625465 | BF070148 | AW200817 | CF054034 | CF047567 |
| BW626169 | BW625982 | BF070166 | AI438056 | CF054034 | CF049238 |
| BW626169 | BW626033 | BF070218 | BM892609 | CF054034 | CF049596 |
| BW626169 | BW626662 | BF070364 | AW597898 | CF054034 | CF049715 |
| BW626169 | BW626894 | BF070364 | BG790792 | CF054034 | CF049777 |
| BW626169 | BW626934 | BF070364 | BI944061 | CF054034 | CF049835 |
| BW626169 | BW627008 | BF070551 | AW620587 | CF054034 | CF050563 |
| BW626169 | BW627080 | BF070601 | AI855846 | CF054034 | CF050868 |
| BW626169 | BW627479 | BF070601 | AW734625 | CF054034 | CF051510 |
| BW626169 | BW627590 | BF070601 | BM954884 | CF054034 | CF051847 |
| BW626169 | BW627720 | BF070610 | AW277992 | CF054034 | CF052056 |
| BW626169 | BW627834 | BF070610 | BM893246 | CF054034 | CF052061 |
| BW626169 | BW627896 | BF070690 | BI786287 | CF054034 | CF052355 |
| BW626169 | BW628088 | BF070690 | BI973249 | CF054034 | CF052938 |
| BW626169 | BW628329 | BF071132 | BF325153 | CF054034 | CF053441 |
| BW626169 | BW628472 | BF071227 | AW132976 | CF054034 | CF053519 |
| BW626169 | BW628587 | BF071227 | AW760299 | CF054034 | CF053648 |
| BW626169 | BW628740 | BF071557 | BM093318 | CF054034 | CF053697 |

|          |          |          |          |          |          |
|----------|----------|----------|----------|----------|----------|
| BW626169 | BW628767 | BF071656 | BI785534 | CF054034 | CF053727 |
| BW626169 | BW629290 | BF324465 | BG238428 | CF054034 | CF053903 |
| BW626169 | BW629338 | BF324465 | BM093734 | CF054034 | CF054066 |
| BW626169 | BW629575 | BF324660 | CA953216 | CF054034 | CF054072 |
| BW626169 | BW629673 | BF324660 | CA953339 | CF054034 | CF054166 |
| BW626169 | BW629693 | BF324697 | AI496396 | CF054034 | CF054280 |
| BW626169 | BW629767 | BF324697 | AI736604 | CF054034 | CF054454 |
| BW626169 | BW630182 | BF324715 | BM892192 | CF054034 | CF054759 |
| BW626169 | BW630222 | BF324889 | AW349153 | CF054034 | CF054820 |
| BW626169 | BW630484 | BF324889 | BI785737 | CF054034 | CF055097 |
| BW626169 | BW630621 | BF324995 | BF596179 | CF054034 | CF055562 |
| BW626169 | BW630746 | BF324999 | BG156252 | CF054034 | CF056317 |
| BW626169 | BW631236 | BF325145 | AW433076 | CF054152 | CD976280 |
| BW626169 | BW631443 | BF325155 | BM892192 | CF054152 | CD976304 |
| BW626169 | BW631527 | BF325411 | AW734630 | CF054152 | CD978048 |
| BW626169 | BW632381 | BF325411 | BM143158 | CF054192 | CF057002 |
| BW626169 | BW632585 | BF325411 | CA937936 | CF054206 | CF035892 |
| BW626169 | BW632586 | BF423438 | AW133209 | CF054213 | CF050341 |
| BW626169 | BW633094 | BF423447 | BG316158 | CF054213 | CF057171 |
| BW626169 | BW633220 | BF423797 | BI471651 | CF054217 | CD988583 |
| BW626169 | CB826665 | BF423847 | BM892192 | CF054228 | CF048568 |
| BW626169 | CB826666 | BF424101 | BM885920 | CF054228 | CF048823 |
| BW626171 | BW624004 | BF424172 | BG789482 | CF054228 | CF049512 |
| BW626243 | BW597308 | BF424214 | AI856288 | CF054228 | CF053010 |
| BW626308 | BW597308 | BF424214 | AI966221 | CF054228 | CF055089 |
| BW626366 | BW595586 | BF424214 | BE804557 | CF054249 | CF038072 |
| BW626383 | BW624004 | BF424214 | BG154911 | CF054260 | CF038248 |
| BW626531 | BW597308 | BF424214 | BG155456 | CF054265 | CD971673 |
| BW626614 | AW720235 | BF424214 | BG157067 | CF054265 | CD998843 |
| BW626614 | BW627857 | BF424214 | BI941949 | CF054265 | CF054562 |
| BW626614 | BW628365 | BF424214 | CA937697 | CF054330 | CF054992 |
| BW626614 | BW629747 | BF424224 | BE474946 | CF054405 | CF035206 |
| BW626614 | BW632865 | BF424227 | AW132573 | CF054405 | CF036021 |
| BW626614 | CB827247 | BF424227 | AW782206 | CF054405 | CF036879 |
| BW626614 | CB829655 | BF424238 | BM893385 | CF054405 | CF050257 |
| BW626785 | BW628977 | BF424449 | AI441060 | CF054405 | CF054832 |
| BW626828 | BW623042 | BF424449 | AW568734 | CF054414 | CF038248 |
| BW626997 | BW597308 | BF424449 | AW761071 | CF054421 | CD978634 |
| BW627001 | BP062055 | BF424449 | BF010100 | CF054463 | CD980456 |
| BW627001 | BW595771 | BF424771 | BG316158 | CF054470 | CD987288 |
| BW627001 | BW621308 | BF424771 | BM892192 | CF054495 | CD976087 |
| BW627001 | BW621533 | BF424771 | CA953216 | CF054495 | CD983169 |
| BW627001 | BW621687 | BF424798 | AW781828 | CF054495 | CD985901 |
| BW627001 | BW621720 | BF424870 | BF594977 | CF054495 | CD986903 |
| BW627001 | BW622129 | BF425169 | BG882363 | CF054495 | CD988703 |
| BW627001 | BW622185 | BF425313 | AI443857 | CF054648 | CD986565 |
| BW627001 | BW622451 | BF425313 | AI736918 | CF054648 | CD990759 |
| BW627001 | BW622659 | BF425313 | AI736994 | CF054648 | CD997782 |
| BW627001 | BW622706 | BF425313 | AI737010 | CF054648 | CD997980 |
| BW627001 | BW622736 | BF425313 | AI855452 | CF054648 | CD998172 |
| BW627001 | BW622859 | BF425313 | AI855474 | CF054648 | CD998537 |
| BW627001 | BW622955 | BF425313 | AI855514 | CF054648 | CF038479 |

|          |          |          |          |          |          |
|----------|----------|----------|----------|----------|----------|
| BW627001 | BW622963 | BF425313 | AI900459 | CF054648 | CF038501 |
| BW627001 | BW623131 | BF425313 | AI900922 | CF054648 | CF041290 |
| BW627001 | BW623249 | BF425313 | AI900952 | CF054648 | CF041798 |
| BW627001 | BW623254 | BF425313 | AI966016 | CF054648 | CF042164 |
| BW627001 | BW623255 | BF425313 | AI966076 | CF054648 | CF042328 |
| BW627001 | BW623299 | BF425313 | AI966118 | CF054648 | CF042860 |
| BW627001 | BW623300 | BF425313 | AW101238 | CF054648 | CF048702 |
| BW627001 | BW623351 | BF425313 | AW132291 | CF054648 | CF049396 |
| BW627001 | BW623510 | BF425313 | AW132310 | CF054648 | CF049715 |
| BW627001 | BW623620 | BF425313 | AW132364 | CF054648 | CF050868 |
| BW627001 | BW623664 | BF425313 | AW132376 | CF054648 | CF051232 |
| BW627001 | BW623668 | BF425313 | AW132417 | CF054648 | CF052061 |
| BW627001 | BW623717 | BF425313 | AW132471 | CF054648 | CF052355 |
| BW627001 | BW623785 | BF425313 | AW132519 | CF054648 | CF053145 |
| BW627001 | BW623916 | BF425313 | AW132600 | CF054648 | CF053441 |
| BW627001 | BW624240 | BF425313 | AW132716 | CF054648 | CF053648 |
| BW627001 | BW624290 | BF425313 | AW132843 | CF054648 | CF053727 |
| BW627001 | BW624355 | BF425313 | AW132876 | CF054648 | CF054280 |
| BW627001 | BW624385 | BF425313 | AW132885 | CF054648 | CF054451 |
| BW627001 | BW624625 | BF425313 | AW132981 | CF054648 | CF054820 |
| BW627001 | BW624711 | BF425313 | AW133035 | CF054648 | CF055459 |
| BW627001 | BW624749 | BF425313 | AW133193 | CF054648 | CF056591 |
| BW627001 | BW625008 | BF425313 | AW133305 | CF054648 | CF058224 |
| BW627001 | BW625016 | BF425313 | AW133336 | CF054660 | CF031962 |
| BW627001 | BW625112 | BF425313 | AW200803 | CF054660 | CF032062 |
| BW627001 | BW625119 | BF425313 | AW200940 | CF054660 | CF032097 |
| BW627001 | BW626058 | BF425313 | AW201012 | CF054677 | CD990570 |
| BW627001 | BW626271 | BF425313 | AW201109 | CF054677 | CD990605 |
| BW627001 | BW626475 | BF425313 | AW201555 | CF054677 | CD998365 |
| BW627001 | BW626481 | BF425313 | AW201615 | CF054677 | CF035884 |
| BW627001 | BW626809 | BF425313 | AW201774 | CF054677 | CF040903 |
| BW627001 | BW626821 | BF425313 | AW201975 | CF054677 | CF041809 |
| BW627001 | BW626870 | BF425313 | AW279204 | CF054726 | CD976893 |
| BW627001 | BW626956 | BF425313 | AW279339 | CF054726 | CD987700 |
| BW627001 | BW627363 | BF425313 | AW279340 | CF054726 | CF049198 |
| BW627001 | BW627620 | BF425313 | AW396315 | CF054726 | CF050341 |
| BW627001 | BW627691 | BF425313 | AW396655 | CF054726 | CF057171 |
| BW627001 | BW627925 | BF425313 | AW570048 | CF054744 | CF053894 |
| BW627001 | BW627934 | BF425313 | AW570235 | CF054797 | CF049559 |
| BW627001 | BW628445 | BF425313 | AW570283 | CF054805 | CF045829 |
| BW627001 | BW628477 | BF425313 | AW596377 | CF054819 | CX129584 |
| BW627001 | BW628827 | BF425313 | AW596421 | CF054831 | CF035892 |
| BW627001 | BW629124 | BF425313 | AW596642 | CF054873 | CF055418 |
| BW627001 | BW629199 | BF425313 | AW596721 | CF054881 | CF057171 |
| BW627001 | BW629231 | BF425313 | AW620315 | CF054892 | CF051946 |
| BW627001 | BW629385 | BF425313 | AW620345 | CF054930 | CF039694 |
| BW627001 | BW629449 | BF425313 | AW620517 | CF054933 | CF054485 |
| BW627001 | BW629475 | BF425313 | AW620586 | CF054959 | CF057186 |
| BW627001 | BW629494 | BF425313 | AW620691 | CF054980 | CF033288 |
| BW627001 | BW629498 | BF425313 | AW733949 | CF055004 | CD981700 |
| BW627001 | BW629744 | BF425313 | AW734474 | CF055004 | CD982029 |
| BW627001 | BW629746 | BF425313 | AW734503 | CF055004 | CD990265 |

|          |          |          |          |          |          |
|----------|----------|----------|----------|----------|----------|
| BW627001 | BW630000 | BF425313 | AW734510 | CF055018 | CF038248 |
| BW627001 | BW630218 | BF425313 | AW734535 | CF055080 | CD987496 |
| BW627001 | BW630219 | BF425313 | AW734792 | CF055080 | CF055277 |
| BW627001 | BW630251 | BF425313 | AW734851 | CF055107 | CD986005 |
| BW627001 | BW630256 | BF425313 | AW734959 | CF055107 | CF049440 |
| BW627001 | BW630363 | BF425313 | AW759293 | CF055107 | CF052966 |
| BW627001 | BW630404 | BF425313 | AW759712 | CF055107 | CF053046 |
| BW627001 | BW630474 | BF425313 | AW780619 | CF055107 | CF053111 |
| BW627001 | BW630513 | BF425313 | BE190189 | CF055107 | CF053121 |
| BW627001 | BW630613 | BF425313 | BE190211 | CF055107 | CF053210 |
| BW627001 | BW630688 | BF425313 | BE190268 | CF055107 | CF053442 |
| BW627001 | BW630742 | BF425313 | BE190359 | CF055107 | CF053987 |
| BW627001 | BW630750 | BF425313 | BE330836 | CF055109 | CD971711 |
| BW627001 | BW631064 | BF425313 | BE331375 | CF055109 | CD971952 |
| BW627001 | BW631104 | BF425313 | BE440893 | CF055109 | CD973622 |
| BW627001 | BW631241 | BF425313 | BE473609 | CF055109 | CD974468 |
| BW627001 | BW631317 | BF425313 | BE473858 | CF055109 | CD974563 |
| BW627001 | BW631604 | BF425313 | BE608963 | CF055109 | CD975189 |
| BW627001 | BW631621 | BF425313 | BE609040 | CF055109 | CD975645 |
| BW627001 | BW631680 | BF425313 | BE609151 | CF055109 | CF055243 |
| BW627001 | BW631763 | BF425313 | BE609161 | CF055109 | CF055683 |
| BW627001 | BW631811 | BF425313 | BE609237 | CF055118 | CF035892 |
| BW627001 | BW632010 | BF425313 | BE609398 | CF055120 | CF048810 |
| BW627001 | BW632299 | BF425313 | BE806982 | CF055120 | CF054232 |
| BW627001 | BW632796 | BF425313 | BE807040 | CF055120 | CF054691 |
| BW627001 | BW632972 | BF425313 | BE807193 | CF055130 | CF049203 |
| BW627001 | BW633028 | BF425313 | BE807587 | CF055130 | CF052966 |
| BW627001 | BW633271 | BF425313 | BF009253 | CF055130 | CF053046 |
| BW627001 | CB828227 | BF425313 | BF324710 | CF055130 | CF053111 |
| BW627004 | BW630253 | BF425313 | BF324715 | CF055130 | CF053121 |
| BW627063 | BW597308 | BF425313 | BF424771 | CF055130 | CF053195 |
| BW627065 | BW597308 | BF425313 | BF425843 | CF055130 | CF053210 |
| BW627067 | AW720235 | BF425313 | BF426098 | CF055130 | CF053987 |
| BW627067 | BW627857 | BF425313 | BG043392 | CF055130 | CF054460 |
| BW627067 | BW628365 | BF425313 | BG154734 | CF055138 | CF047011 |
| BW627067 | BW629747 | BF425313 | BG154983 | CF055138 | CF047204 |
| BW627067 | BW632865 | BF425313 | BG155298 | CF055160 | CD988904 |
| BW627067 | CB827247 | BF425313 | BG155383 | CF055160 | CF049615 |
| BW627067 | CB829655 | BF425313 | BG157222 | CF055162 | CF048910 |
| BW627249 | BW628977 | BF425313 | BG238541 | CF055162 | CF051449 |
| BW627259 | BW626925 | BF425313 | BG315560 | CF055192 | CF049104 |
| BW627270 | BW599651 | BF425313 | BG315675 | CF055200 | CD983701 |
| BW627270 | BW626599 | BF425313 | BG315676 | CF055200 | CD984001 |
| BW627270 | BW627709 | BF425313 | BG315769 | CF055200 | CD984791 |
| BW627270 | BW631510 | BF425313 | BG315870 | CF055200 | CD985157 |
| BW627562 | BW626925 | BF425313 | BG315958 | CF055200 | CF047865 |
| BW627601 | BW630406 | BF425313 | BG316194 | CF055200 | CF050084 |
| BW627621 | BW628977 | BF425313 | BG316379 | CF055200 | CF053633 |
| BW627625 | BW598212 | BF425313 | BM143106 | CF055200 | CF054207 |
| BW627686 | BW626925 | BF425313 | BM892191 | CF055200 | CF054571 |
| BW627815 | AW720235 | BF425313 | BM893258 | CF055200 | CF055424 |
| BW627815 | BW628365 | BF425313 | BM893381 | CF055345 | CD985555 |

|          |          |          |          |          |          |
|----------|----------|----------|----------|----------|----------|
| BW627815 | BW629747 | BF425313 | BM893465 | CF055435 | CD979289 |
| BW627815 | BW632865 | BF425313 | BM953988 | CF055450 | CF040978 |
| BW627815 | CB827247 | BF425313 | BM954893 | CF055450 | CF047975 |
| BW627815 | CB829655 | BF425313 | CA802696 | CF055450 | CF049818 |
| BW627855 | AI967813 | BF425313 | CA935129 | CF055543 | CD986870 |
| BW627855 | AW164172 | BF425313 | CA953127 | CF055543 | CD998877 |
| BW627855 | AW719910 | BF425313 | CA953237 | CF055576 | CF035851 |
| BW627855 | BI418006 | BF425313 | CB063544 | CF055753 | CF055277 |
| BW627855 | BI418059 | BF425331 | AW756933 | CF055864 | CF038187 |
| BW627855 | BI418458 | BF425331 | CA953347 | CF055884 | CF052022 |
| BW627855 | BI418516 | BF425351 | CA953216 | CF056014 | CD972328 |
| BW627855 | BI418521 | BF425351 | CA953339 | CF056014 | CD974577 |
| BW627855 | BI418677 | BF425357 | BF071687 | CF056090 | CF052022 |
| BW627855 | BI418712 | BF425358 | BI973436 | CF056153 | CF040808 |
| BW627855 | BI418740 | BF425625 | AW277739 | CF056208 | CF044095 |
| BW627855 | BI419021 | BF425797 | BG316158 | CF056208 | CF044116 |
| BW627855 | BI419803 | BF425797 | BM892192 | CF056254 | CF038248 |
| BW627855 | BI420097 | BF425797 | CA953216 | CF056457 | CD980019 |
| BW627855 | BI420236 | BF425797 | CA953339 | CF056513 | CD972629 |
| BW627855 | BI420497 | BF425830 | AI856565 | CF056513 | CD973607 |
| BW627855 | BP059377 | BF425830 | AW201529 | CF056513 | CD974429 |
| BW627855 | BP061251 | BF425830 | AW278684 | CF056513 | CD974729 |
| BW627855 | BW597543 | BF425830 | AW781952 | CF056513 | CD974905 |
| BW627855 | BW621298 | BF425843 | BM892192 | CF056513 | CD975126 |
| BW627855 | BW621322 | BF425849 | BM892512 | CF056513 | CD997588 |
| BW627855 | BW621353 | BF425884 | BG316158 | CF056513 | CF039413 |
| BW627855 | BW621398 | BF425884 | BM892192 | CF056513 | CF040700 |
| BW627855 | BW621408 | BF425884 | CA953216 | CF056513 | CF042035 |
| BW627855 | BW621419 | BF425885 | BU090814 | CF056513 | CF051805 |
| BW627855 | BW621443 | BF425907 | BG316158 | CF056513 | CF053128 |
| BW627855 | BW621447 | BF425907 | BM892192 | CF056513 | CF054039 |
| BW627855 | BW621456 | BF425907 | CA953216 | CF056513 | CF058049 |
| BW627855 | BW621547 | BF425909 | BM892192 | CF056589 | CD987700 |
| BW627855 | BW621551 | BF425972 | BM892192 | CF056589 | CF049198 |
| BW627855 | BW621569 | BF426066 | BM892097 | CF056589 | CF050341 |
| BW627855 | BW621670 | BF426072 | BG155568 | CF056589 | CF057171 |
| BW627855 | BW621701 | BF426103 | BI972604 | CF056593 | CF044344 |
| BW627855 | BW621710 | BF426145 | BE440385 | CF056611 | CD997927 |
| BW627855 | BW621741 | BF426145 | BE440507 | CF056611 | CF029996 |
| BW627855 | BW621801 | BF426145 | BE440710 | CF056669 | CD975453 |
| BW627855 | BW621828 | BF426145 | BE610070 | CF056669 | CD976603 |
| BW627855 | BW621841 | BF426145 | BF068814 | CF056669 | CD977169 |
| BW627855 | BW621868 | BF426145 | BF070324 | CF056669 | CD981350 |
| BW627855 | BW621884 | BF426145 | BF071187 | CF056669 | CD985838 |
| BW627855 | BW621890 | BF426145 | BG238778 | CF056669 | CF033055 |
| BW627855 | BW621931 | BF426145 | BG790641 | CF056669 | CF033310 |
| BW627855 | BW621936 | BF426145 | BG790882 | CF056669 | CF033924 |
| BW627855 | BW621958 | BF426145 | BG881511 | CF056669 | CF037305 |
| BW627855 | BW621992 | BF426145 | BI316483 | CF056669 | CF039401 |
| BW627855 | BW622058 | BF426145 | BI471655 | CF056669 | CF048772 |
| BW627855 | BW622087 | BF426145 | BI471722 | CF056669 | CF049776 |
| BW627855 | BW622088 | BF426145 | BI787634 | CF056669 | CF049973 |

|          |          |          |          |          |          |
|----------|----------|----------|----------|----------|----------|
| BW627855 | BW622098 | BF426145 | BM731531 | CF056669 | CF051144 |
| BW627855 | BW622100 | BF426145 | BM885776 | CF056669 | CF052027 |
| BW627855 | BW622110 | BF426145 | BM892095 | CF056669 | CF052853 |
| BW627855 | BW622146 | BF426154 | BG155568 | CF056669 | CF052891 |
| BW627855 | BW622183 | BF426154 | BU090814 | CF056669 | CF052983 |
| BW627855 | BW622227 | BF426191 | BG882625 | CF056669 | CF053412 |
| BW627855 | BW622228 | BF595219 | CA938868 | CF056669 | CF054181 |
| BW627855 | BW622248 | BF595241 | BF071638 | CF056669 | CF058045 |
| BW627855 | BW622252 | BF595241 | BG882331 | CF056706 | CD972959 |
| BW627855 | BW622274 | BF595335 | AW132573 | CF056706 | CD982041 |
| BW627855 | BW622277 | BF595335 | AW782206 | CF056706 | CD986940 |
| BW627855 | BW622314 | BF595883 | BG316158 | CF056706 | CF032993 |
| BW627855 | BW622357 | BF595883 | BM892192 | CF056706 | CF033768 |
| BW627855 | BW622384 | BF595883 | CA953216 | CF056706 | CF033920 |
| BW627855 | BW622391 | BF595897 | BG157563 | CF056706 | CF037121 |
| BW627855 | BW622404 | BF595898 | BF010209 | CF056706 | CF039715 |
| BW627855 | BW622415 | BF595899 | AI736604 | CF056706 | CF039947 |
| BW627855 | BW622416 | BF595901 | BG316158 | CF056706 | CF042724 |
| BW627855 | BW622440 | BF595901 | BM892192 | CF056706 | CF048173 |
| BW627855 | BW622455 | BF595901 | CA953216 | CF056706 | CF049557 |
| BW627855 | BW622471 | BF595902 | AW705444 | CF056706 | CF050557 |
| BW627855 | BW622495 | BF595908 | AW760771 | CF056706 | CF052974 |
| BW627855 | BW622511 | BF595915 | CA939097 | CF056706 | CF053627 |
| BW627855 | BW622519 | BF596037 | CB063430 | CF056706 | CF054313 |
| BW627855 | BW622551 | BF596059 | AI960844 | CF056706 | CF054475 |
| BW627855 | BW622599 | BF596078 | AI443660 | CF056706 | CF055189 |
| BW627855 | BW622605 | BF596155 | AW782031 | CF056706 | CF055278 |
| BW627855 | BW622679 | BF596155 | AW831990 | CF056706 | CF055733 |
| BW627855 | BW622684 | BF596155 | AW832167 | CF056808 | CF056555 |
| BW627855 | BW622686 | BF596420 | AI441271 | CF056867 | CF057816 |
| BW627855 | BW622689 | BF596420 | AI460420 | CF056919 | CF048769 |
| BW627855 | BW622709 | BF596420 | BI944123 | CF056983 | CF031343 |
| BW627855 | BW622733 | BF596471 | CA953216 | CF056983 | CF031430 |
| BW627855 | BW622774 | BF596471 | CA953339 | CF057013 | CD970704 |
| BW627855 | BW622803 | BF596661 | BM732797 | CF057013 | CD979700 |
| BW627855 | BW622812 | BF596674 | BF594977 | CF057013 | CD979701 |
| BW627855 | BW622819 | BF596681 | AI441281 | CF057013 | CD981321 |
| BW627855 | BW622827 | BF596683 | AI443814 | CF057013 | CD985223 |
| BW627855 | BW622867 | BF596782 | BM954956 | CF057013 | CD985294 |
| BW627855 | BW622888 | BF596796 | AW596680 | CF057013 | CD985549 |
| BW627855 | BW622891 | BG043309 | AI856420 | CF057013 | CD986753 |
| BW627855 | BW622904 | BG043309 | CA937697 | CF057013 | CD986928 |
| BW627855 | BW622941 | BG043323 | CA953216 | CF057013 | CD987265 |
| BW627855 | BW622988 | BG043323 | CA953339 | CF057013 | CD989677 |
| BW627855 | BW622997 | BG043339 | AI856288 | CF057013 | CF033078 |
| BW627855 | BW623012 | BG043339 | AI856420 | CF057013 | CF033145 |
| BW627855 | BW623033 | BG043339 | BF426095 | CF057013 | CF033206 |
| BW627855 | BW623086 | BG043339 | BG156931 | CF057013 | CF033448 |
| BW627855 | BW623154 | BG043339 | BG237075 | CF057013 | CF049109 |
| BW627855 | BW623162 | BG043339 | BI941949 | CF057013 | CF050117 |
| BW627855 | BW623211 | BG043367 | AW308739 | CF057013 | CF051953 |
| BW627855 | BW623219 | BG043367 | BE609060 | CF057013 | CF053330 |

|          |          |          |          |          |          |
|----------|----------|----------|----------|----------|----------|
| BW627855 | BW623224 | BG043392 | CA953216 | CF057013 | CF053584 |
| BW627855 | BW623287 | BG043392 | CA953339 | CF057013 | CF053649 |
| BW627855 | BW623307 | BG043464 | CA953216 | CF057013 | CF053686 |
| BW627855 | BW623323 | BG043464 | CA953339 | CF057013 | CF053867 |
| BW627855 | BW623332 | BG046978 | AW201242 | CF057013 | CF055185 |
| BW627855 | BW623336 | BG047125 | AI494797 | CF057013 | CF055290 |
| BW627855 | BW623339 | BG154317 | BM892315 | CF057013 | CF055421 |
| BW627855 | BW623384 | BG154321 | AI901099 | CF057013 | CF055553 |
| BW627855 | BW623401 | BG154349 | BG043286 | CF057013 | CF055700 |
| BW627855 | BW623407 | BG154375 | BI944400 | CF057013 | CF056371 |
| BW627855 | BW623462 | BG154398 | BG046944 | CF057013 | CF058106 |
| BW627855 | BW623482 | BG154409 | AW307235 | CF057031 | CD999500 |
| BW627855 | BW623531 | BG154461 | BG881461 | CF057163 | CF048726 |
| BW627855 | BW623550 | BG154516 | BU090853 | CF057173 | CF059478 |
| BW627855 | BW623559 | BG154559 | AI900170 | CF057173 | CF060290 |
| BW627855 | BW623569 | BG154559 | BM892571 | CF057175 | CD972411 |
| BW627855 | BW623597 | BG154560 | AW459931 | CF057175 | CF039780 |
| BW627855 | BW623621 | BG154628 | AI442880 | CF057220 | CD984362 |
| BW627855 | BW623724 | BG154628 | AW348688 | CF057229 | CD987288 |
| BW627855 | BW623744 | BG154650 | BE473548 | CF057366 | CF037354 |
| BW627855 | BW623768 | BG154650 | BE609270 | CF057366 | CF041146 |
| BW627855 | BW623776 | BG154683 | AI495703 | CF057366 | CF057581 |
| BW627855 | BW623795 | BG154734 | BG316158 | CF057366 | CF057815 |
| BW627855 | BW623828 | BG154734 | BM892192 | CF057371 | CD968095 |
| BW627855 | BW623844 | BG154734 | CA953216 | CF057371 | CD984362 |
| BW627855 | BW623849 | BG154744 | BM893263 | CF057371 | CD986891 |
| BW627855 | BW623875 | BG154880 | CA819043 | CF057397 | CD999361 |
| BW627855 | BW623885 | BG154883 | CA953049 | CF057561 | CD974013 |
| BW627855 | BW623898 | BG154887 | BM892192 | CF057561 | CD974324 |
| BW627855 | BW623910 | BG155076 | BM892192 | CF057586 | CD981465 |
| BW627855 | BW623923 | BG155085 | BE804557 | CF057586 | CD981780 |
| BW627855 | BW623937 | BG155085 | BG154911 | CF057586 | CD982201 |
| BW627855 | BW623983 | BG155085 | CA937697 | CF057586 | CD982248 |
| BW627855 | BW624026 | BG155176 | AW132397 | CF057586 | CD982269 |
| BW627855 | BW624063 | BG155227 | BM893263 | CF057586 | CD982348 |
| BW627855 | BW624068 | BG155244 | BM893263 | CF057586 | CF034875 |
| BW627855 | BW624073 | BG155254 | AI856420 | CF057729 | CD996488 |
| BW627855 | BW624092 | BG155254 | AI960073 | CF057729 | CF038330 |
| BW627855 | BW624097 | BG155254 | AI966221 | CF057729 | CF039722 |
| BW627855 | BW624107 | BG155254 | BE610450 | CF057729 | CF041381 |
| BW627855 | BW624128 | BG155254 | BE804557 | CF057729 | CF041709 |
| BW627855 | BW624158 | BG155254 | BF426095 | CF057736 | CF040808 |
| BW627855 | BW624173 | BG155254 | BG155152 | CF057739 | CD972629 |
| BW627855 | BW624177 | BG155254 | BG237075 | CF057739 | CD973607 |
| BW627855 | BW624203 | BG155254 | CA802377 | CF057739 | CD974429 |
| BW627855 | BW624242 | BG155254 | CA937697 | CF057739 | CD974729 |
| BW627855 | BW624270 | BG155370 | AI736952 | CF057739 | CD974788 |
| BW627855 | BW624302 | BG155374 | BM954298 | CF057739 | CD974905 |
| BW627855 | BW624321 | BG155383 | BM892192 | CF057739 | CD975126 |
| BW627855 | BW624338 | BG155427 | BF596179 | CF057739 | CD997588 |
| BW627855 | BW624361 | BG155588 | AW277658 | CF057739 | CF039413 |
| BW627855 | BW624374 | BG155588 | AW350731 | CF057739 | CF040700 |

|          |          |          |          |          |          |
|----------|----------|----------|----------|----------|----------|
| BW627855 | BW624430 | BG155790 | AI736604 | CF057739 | CF042035 |
| BW627855 | BW624456 | BG155790 | AI901200 | CF057739 | CF042456 |
| BW627855 | BW624495 | BG155865 | AI736274 | CF057739 | CF047765 |
| BW627855 | BW624518 | BG155865 | AW133057 | CF057739 | CF049536 |
| BW627855 | BW624522 | BG155865 | AW348363 | CF057739 | CF051805 |
| BW627855 | BW624552 | BG155865 | BE440327 | CF057739 | CF053128 |
| BW627855 | BW624593 | BG155865 | BF070381 | CF057739 | CF057123 |
| BW627855 | BW624610 | BG155865 | BG043329 | CF057755 | CF038187 |
| BW627855 | BW624690 | BG155865 | CA952989 | CF057787 | CF053830 |
| BW627855 | BW624740 | BG156226 | BE330814 | CF057846 | CD972118 |
| BW627855 | BW624743 | BG156255 | BI787537 | CF057846 | CD973275 |
| BW627855 | BW624750 | BG156283 | BF070635 | CF057846 | CD974033 |
| BW627855 | BW624783 | BG156296 | BI787520 | CF057846 | CD975732 |
| BW627855 | BW624798 | BG156306 | BI316340 | CF057846 | CF038626 |
| BW627855 | BW624804 | BG156335 | BG882625 | CF057848 | CF048371 |
| BW627855 | BW624806 | BG156427 | AW759845 | CF057865 | CF049198 |
| BW627855 | BW624816 | BG156427 | BE473899 | CF057865 | CF050341 |
| BW627855 | BW624819 | BG156435 | BE609363 | CF057865 | CF057171 |
| BW627855 | BW624869 | BG156614 | AI856288 | CF057867 | CF043555 |
| BW627855 | BW624896 | BG156614 | AI966221 | CF057956 | CF040463 |
| BW627855 | BW624898 | BG156614 | BE804557 | CF057956 | CF055903 |
| BW627855 | BW624908 | BG156614 | BG155456 | CF058073 | CD985555 |
| BW627855 | BW624990 | BG156614 | BG157067 | CF058089 | CD973931 |
| BW627855 | BW625000 | BG156614 | BI941949 | CF058110 | CD977200 |
| BW627855 | BW625022 | BG156614 | CA937697 | CF058111 | CD977200 |
| BW627855 | BW625060 | BG156629 | AI494797 | CF058380 | CF033472 |
| BW627855 | BW625091 | BG156932 | BE330839 | CF058485 | CD972215 |
| BW627855 | BW625107 | BG156971 | AI736952 | CF058485 | CD972809 |
| BW627855 | BW625136 | BG156985 | BI944031 | CF058485 | CD975373 |
| BW627855 | BW625142 | BG157032 | BG316158 | CF058485 | CD976735 |
| BW627855 | BW625172 | BG157032 | BM892192 | CF058485 | CD979105 |
| BW627855 | BW625183 | BG157032 | CA953216 | CF058485 | CF058928 |
| BW627855 | BW625194 | BG157034 | BG316158 | CF058485 | CF058934 |
| BW627855 | BW625211 | BG157034 | BM892192 | CF058485 | CF059182 |
| BW627855 | BW625285 | BG157034 | CA953216 | CF058485 | CF059241 |
| BW627855 | BW625299 | BG157083 | AW760575 | CF058485 | CF059264 |
| BW627855 | BW625308 | BG157102 | BE347400 | CF058541 | CD989390 |
| BW627855 | BW625345 | BG157326 | BM892311 | CF058541 | CD989688 |
| BW627855 | BW625348 | BG157377 | BM893263 | CF058614 | CD971489 |
| BW627855 | BW625355 | BG157535 | BM885241 | CF058614 | CD972809 |
| BW627855 | BW625367 | BG157548 | BM893263 | CF058614 | CD975927 |
| BW627855 | BW625408 | BG157720 | AI460525 | CF058614 | CD975928 |
| BW627855 | BW625409 | BG157720 | BI316261 | CF058614 | CD976735 |
| BW627855 | BW625413 | BG157760 | BM885049 | CF058614 | CD977399 |
| BW627855 | BW625433 | BG157763 | BI787537 | CF058614 | CD979116 |
| BW627855 | BW625530 | BG237016 | AW277876 | CF058614 | CD982868 |
| BW627855 | BW625602 | BG237060 | AI494797 | CF058614 | CF040197 |
| BW627855 | BW625623 | BG237141 | CA953347 | CF058614 | CF058934 |
| BW627855 | BW625662 | BG237211 | AW279417 | CF058614 | CF059056 |
| BW627855 | BW625674 | BG237227 | BI943813 | CF058614 | CF059174 |
| BW627855 | BW625711 | BG237358 | AI748756 | CF058614 | CF059200 |
| BW627855 | BW625717 | BG237358 | AI759653 | CF058614 | CF059264 |



|          |          |          |          |          |          |
|----------|----------|----------|----------|----------|----------|
| BW627855 | BW625736 | BG237358 | AI795043 | CF058738 | CD983713 |
| BW627855 | BW625747 | BG237358 | AI940887 | CF058751 | CD971806 |
| BW627855 | BW625748 | BG237358 | AI941071 | CF058751 | CD972191 |
| BW627855 | BW625777 | BG237358 | AI941269 | CF058751 | CD972206 |
| BW627855 | BW625779 | BG237358 | AW184866 | CF058751 | CD972661 |
| BW627855 | BW625813 | BG237358 | AW317706 | CF058751 | CD973141 |
| BW627855 | BW625827 | BG237358 | AW317725 | CF058751 | CD973157 |
| BW627855 | BW625858 | BG237358 | AW317760 | CF058751 | CD973448 |
| BW627855 | BW625925 | BG237358 | AW318074 | CF058751 | CD973635 |
| BW627855 | BW625967 | BG237358 | AW318104 | CF058751 | CD973765 |
| BW627855 | BW625968 | BG237358 | AW318180 | CF058751 | CD974225 |
| BW627855 | BW625976 | BG237358 | AW395640 | CF058751 | CD974475 |
| BW627855 | BW626062 | BG237358 | AW395736 | CF058751 | CD975374 |
| BW627855 | BW626069 | BG237358 | AW395752 | CF058751 | CD976274 |
| BW627855 | BW626083 | BG237358 | AW396957 | CF058751 | CD977600 |
| BW627855 | BW626126 | BG237358 | AW396977 | CF058751 | CD978828 |
| BW627855 | BW626216 | BG237358 | AW397017 | CF058751 | CD985646 |
| BW627855 | BW626235 | BG237358 | AW397019 | CF058751 | CF043668 |
| BW627855 | BW626238 | BG237358 | AW397126 | CF058751 | CF060108 |
| BW627855 | BW626247 | BG237358 | AW397204 | CF058751 | CF060299 |
| BW627855 | BW626273 | BG237358 | AW397269 | CF058751 | CF060324 |
| BW627855 | BW626292 | BG237358 | AW397420 | CF058992 | CD968299 |
| BW627855 | BW626318 | BG237358 | AW471995 | CF058992 | CD970202 |
| BW627855 | BW626325 | BG237358 | AW472053 | CF058992 | CD988625 |
| BW627855 | BW626341 | BG237358 | AW472092 | CF059003 | CD984063 |
| BW627855 | BW626345 | BG237358 | BG237764 | CF059018 | CD974078 |
| BW627855 | BW626450 | BG237358 | BG237925 | CF059018 | CD974225 |
| BW627855 | BW626485 | BG237358 | BI945430 | CF059018 | CD974475 |
| BW627855 | BW626521 | BG237424 | BG882625 | CF059018 | CD975374 |
| BW627855 | BW626584 | BG237424 | BI786492 | CF059026 | CD971724 |
| BW627855 | BW626660 | BG237432 | AW620209 | CF059026 | CD977399 |
| BW627855 | BW626716 | BG237432 | BF070635 | CF059026 | CD979105 |
| BW627855 | BW626725 | BG237564 | AW397445 | CF059026 | CD979116 |
| BW627855 | BW626758 | BG237652 | BF009978 | CF059026 | CD982868 |
| BW627855 | BW626765 | BG237652 | BG237237 | CF059026 | CF040197 |
| BW627855 | BW626791 | BG237653 | AI735945 | CF059026 | CF058928 |
| BW627855 | BW626799 | BG237667 | AW277739 | CF059026 | CF059174 |
| BW627855 | BW626841 | BG237778 | AW596008 | CF059026 | CF059200 |
| BW627855 | BW626984 | BG237813 | BI786052 | CF059026 | CF059264 |
| BW627855 | BW627064 | BG237982 | BM732780 | CF059092 | CD971806 |
| BW627855 | BW627066 | BG237985 | BI787691 | CF059092 | CD972206 |
| BW627855 | BW627100 | BG238006 | AI736580 | CF059092 | CD972661 |
| BW627855 | BW627128 | BG238006 | AW185391 | CF059092 | CD973103 |
| BW627855 | BW627164 | BG238006 | AW460067 | CF059092 | CD973157 |
| BW627855 | BW627173 | BG238006 | BG882437 | CF059092 | CD973448 |
| BW627855 | BW627188 | BG238031 | AW757258 | CF059092 | CD973635 |
| BW627855 | BW627200 | BG238078 | AW100281 | CF059092 | CD973765 |
| BW627855 | BW627251 | BG238205 | AI494797 | CF059092 | CD974078 |
| BW627855 | BW627375 | BG238219 | BG156262 | CF059092 | CD974475 |
| BW627855 | BW627377 | BG238247 | BI972480 | CF059092 | CD975374 |
| BW627855 | BW627384 | BG238333 | BM885049 | CF059092 | CD976274 |
| BW627855 | BW627409 | BG238463 | CA953049 | CF059092 | CD977966 |

|          |          |          |          |          |          |
|----------|----------|----------|----------|----------|----------|
| BW627855 | BW627424 | BG238515 | BG882142 | CF059092 | CD978828 |
| BW627855 | BW627505 | BG238541 | BG316158 | CF059092 | CD985617 |
| BW627855 | BW627530 | BG238541 | BM892192 | CF059092 | CD985646 |
| BW627855 | BW627572 | BG238541 | CA953216 | CF059092 | CF043668 |
| BW627855 | BW627595 | BG238625 | BI787537 | CF059092 | CF060108 |
| BW627855 | BW627631 | BG238824 | AI443733 | CF059092 | CF060299 |
| BW627855 | BW627662 | BG238830 | AW472372 | CF059092 | CF060324 |
| BW627855 | BW627664 | BG238830 | CA935609 | CF059324 | CD972066 |
| BW627855 | BW627719 | BG238839 | AW760925 | CF059324 | CD985727 |
| BW627855 | BW627744 | BG239011 | CB063430 | CF059324 | CD986165 |
| BW627855 | BW627749 | BG239027 | AW101691 | CF059339 | CD975696 |
| BW627855 | BW627796 | BG239061 | BI787537 | CF059372 | CD990071 |
| BW627855 | BW627803 | BG239065 | AW201242 | CF059372 | CD990376 |
| BW627855 | BW627814 | BG239097 | AW756933 | CF059437 | CF059734 |
| BW627855 | BW627916 | BG239217 | BI785449 | CF059524 | CF060341 |
| BW627855 | BW627968 | BG239220 | AI494797 | CF059540 | CF058239 |
| BW627855 | BW628053 | BG239719 | AW570116 | CF059552 | CF060341 |
| BW627855 | BW628055 | BG239719 | AW760136 | CF059563 | CD968095 |
| BW627855 | BW628076 | BG239719 | BF071168 | CF059563 | CD984362 |
| BW627855 | BW628084 | BG239719 | BI321176 | CF059563 | CD986891 |
| BW627855 | BW628147 | BG315560 | BG316158 | CF059585 | CF060421 |
| BW627855 | BW628158 | BG315560 | BM892192 | CF059638 | CF060341 |
| BW627855 | BW628171 | BG315560 | CA953216 | CF059726 | CF060037 |
| BW627855 | BW628179 | BG315565 | AW201242 | CF059767 | CD972075 |
| BW627855 | BW628186 | BG315568 | BM892192 | CF059767 | CD975632 |
| BW627855 | BW628206 | BG315568 | CA953216 | CF059767 | CD985455 |
| BW627855 | BW628244 | BG315568 | CA953339 | CF059767 | CD985544 |
| BW627855 | BW628253 | BG315605 | BF010310 | CF059767 | CD985939 |
| BW627855 | BW628256 | BG315619 | BF009337 | CF059767 | CD987215 |
| BW627855 | BW628297 | BG315672 | BE347607 | CF059767 | CD987920 |
| BW627855 | BW628336 | BG315677 | AI440692 | CF059767 | CD996980 |
| BW627855 | BW628354 | BG315692 | BE347347 | CF059767 | CF034414 |
| BW627855 | BW628409 | BG315745 | BM892192 | CF059767 | CF034544 |
| BW627855 | BW628452 | BG315782 | BG316158 | CF059767 | CF034552 |
| BW627855 | BW628467 | BG315784 | BG316158 | CF059767 | CF034678 |
| BW627855 | BW628480 | BG315819 | BG316158 | CF059767 | CF048461 |
| BW627855 | BW628511 | BG315820 | CA953216 | CF059767 | CF058984 |
| BW627855 | BW628539 | BG315820 | CA953339 | CF059767 | CF060350 |
| BW627855 | BW628586 | BG315851 | BG316158 | CF059786 | CF059368 |
| BW627855 | BW628636 | BG315851 | BM892192 | CF059786 | CF059509 |
| BW627855 | BW628662 | BG315851 | CA953216 | CF059786 | CF059514 |
| BW627855 | BW628679 | BG315855 | AI441281 | CF059786 | CF059570 |
| BW627855 | BW628687 | BG315870 | BM892192 | CF059786 | CF059657 |
| BW627855 | BW628720 | BG315894 | BG316158 | CF059786 | CF059702 |
| BW627855 | BW628738 | BG315894 | CA953216 | CF059786 | CF059809 |
| BW627855 | BW628766 | BG315894 | CA953339 | CF059786 | CF059825 |
| BW627855 | BW628786 | BG315918 | CA953216 | CF059786 | CF059908 |
| BW627855 | BW628795 | BG315918 | CA953339 | CF059786 | CF059954 |
| BW627855 | BW628833 | BG315935 | BM892192 | CF059786 | CF060198 |
| BW627855 | BW628879 | BG315999 | BG316158 | CF059786 | CF060229 |
| BW627855 | BW628895 | BG315999 | BM892192 | CF059797 | CF042169 |
| BW627855 | BW628927 | BG315999 | CA953216 | CF059797 | CF058239 |

|          |          |          |          |          |          |
|----------|----------|----------|----------|----------|----------|
| BW627855 | BW628946 | BG315999 | CA953339 | CF059861 | CF039783 |
| BW627855 | BW628990 | BG316017 | CA953216 | CF059861 | CF044260 |
| BW627855 | BW629056 | BG316017 | CA953339 | CF059861 | CF044569 |
| BW627855 | BW629058 | BG316024 | BG316158 | CF059877 | CF060341 |
| BW627855 | BW629084 | BG316024 | BM892192 | CF059886 | CD968095 |
| BW627855 | BW629107 | BG316024 | CA953216 | CF059892 | CF059569 |
| BW627855 | BW629138 | BG316046 | BM892192 | CF059892 | CF059997 |
| BW627855 | BW629175 | BG316071 | BI974262 | CF059920 | CD968095 |
| BW627855 | BW629213 | BG316141 | CA953216 | CF059920 | CD984362 |
| BW627855 | BW629222 | BG316141 | CA953339 | CF059920 | CD986891 |
| BW627855 | BW629228 | BG316146 | BM892192 | CF059923 | CF059524 |
| BW627855 | BW629253 | BG316147 | AW570116 | CF059923 | CF059638 |
| BW627855 | BW629282 | BG316147 | BF071168 | CF059923 | CF060353 |
| BW627855 | BW629286 | BG316153 | BG316158 | CF059962 | CD988890 |
| BW627855 | BW629333 | BG316153 | BM892192 | CF059962 | CD988911 |
| BW627855 | BW629346 | BG316153 | CA953216 | CF059962 | CD988941 |
| BW627855 | BW629403 | BG316153 | CA953339 | CF059962 | CD988969 |
| BW627855 | BW629448 | BG316166 | BM885409 | CF059962 | CD989016 |
| BW627855 | BW629453 | BG316172 | BG155568 | CF059962 | CD989608 |
| BW627855 | BW629459 | BG316174 | AW782268 | CF059962 | CD989874 |
| BW627855 | BW629496 | BG316174 | AW831068 | CF059962 | CF029181 |
| BW627855 | BW629531 | BG316174 | BI945605 | CF059962 | CF029384 |
| BW627855 | BW629532 | BG316178 | BG316158 | CF059962 | CF030286 |
| BW627855 | BW629538 | BG316178 | BM892192 | CF059975 | CD968095 |
| BW627855 | BW629539 | BG316178 | CA953216 | CF059975 | CD984362 |
| BW627855 | BW629560 | BG316178 | CA953339 | CF059975 | CD986891 |
| BW627855 | BW629564 | BG316182 | BM892192 | CF060098 | CD968095 |
| BW627855 | BW629625 | BG316204 | BM885271 | CF060098 | CD984362 |
| BW627855 | BW629627 | BG316229 | AI496396 | CF060098 | CD986891 |
| BW627855 | BW629636 | BG316232 | BE347060 | CF060130 | CD988411 |
| BW627855 | BW629671 | BG316239 | CA953216 | CF060179 | CD968095 |
| BW627855 | BW629691 | BG316239 | CA953339 | CF060179 | CD984362 |
| BW627855 | BW629742 | BG316272 | BI973339 | CF060179 | CD985191 |
| BW627855 | BW629750 | BG316272 | BM732788 | CF060201 | CD999361 |
| BW627855 | BW629752 | BG316301 | BG316158 | CF060261 | CF033338 |
| BW627855 | BW629759 | BG316301 | BM892192 | CF060261 | CF033930 |
| BW627855 | BW629770 | BG316301 | CA953216 | CF060261 | CF060194 |
| BW627855 | BW629784 | BG316301 | CA953339 | CF060293 | CD980402 |
| BW627855 | BW629854 | BG316379 | CA953216 | CF060293 | CD980414 |
| BW627855 | BW629906 | BG316379 | CA953339 | CF060293 | CD981110 |
| BW627855 | BW630038 | BG316416 | CA953216 | CF060293 | CD981153 |
| BW627855 | BW630107 | BG316416 | CA953339 | CF060339 | CD971806 |
| BW627855 | BW630161 | BG352264 | BG155568 | CF060339 | CD972191 |
| BW627855 | BW630183 | BG352270 | BM885271 | CF060339 | CD972206 |
| BW627855 | BW630257 | BG352275 | CA953216 | CF060339 | CD972661 |
| BW627855 | BW630299 | BG352275 | CA953339 | CF060339 | CD973157 |
| BW627855 | BW630345 | BG352300 | AW831938 | CF060339 | CD973448 |
| BW627855 | BW630388 | BG352308 | CA953216 | CF060339 | CD974225 |
| BW627855 | BW630392 | BG352308 | CA953339 | CF060339 | CD974475 |
| BW627855 | BW630417 | BG352319 | BM892192 | CF060339 | CD976274 |
| BW627855 | BW630427 | BG789462 | AI988604 | CF060339 | CD977600 |
| BW627855 | BW630430 | BG789480 | BI973119 | CF060339 | CD977966 |

|          |          |          |          |          |          |
|----------|----------|----------|----------|----------|----------|
| BW627855 | BW630469 | BG789556 | BF071687 | CF060339 | CD978828 |
| BW627855 | BW630553 | BG789580 | BG882196 | CF060339 | CF060108 |
| BW627855 | BW630682 | BG789580 | BM892206 | CF060339 | CF060299 |
| BW627855 | BW630749 | BG789580 | BM955056 | CF060339 | CF060324 |
| BW627855 | BW630751 | BG789871 | BI973720 | CF060353 | CF060341 |
| BW627855 | BW630758 | BG789874 | BI974397 | CF060364 | CD974626 |
| BW627855 | BW630764 | BG789907 | AW102089 | CF060364 | CD974951 |
| BW627855 | BW630776 | BG789907 | AW757214 | CF060364 | CD975121 |
| BW627855 | BW630829 | BG789923 | AI440884 | CF060364 | CD975135 |
| BW627855 | BW630908 | BG789923 | AI441113 | CF060364 | CD977114 |
| BW627855 | BW630971 | BG789923 | AI856130 | CF060474 | CD968095 |
| BW627855 | BW631001 | BG789923 | AI901155 | CF060474 | CD984362 |
| BW627855 | BW631033 | BG789923 | AW201349 | CX129589 | CD976593 |
| BW627855 | BW631036 | BG789923 | AW310953 | CX129589 | CD988395 |
| BW627855 | BW631049 | BG789923 | AW349537 | CX129589 | CD989139 |
| BW627855 | BW631062 | BG789923 | AW350609 | CX129589 | CD989533 |
| BW627855 | BW631119 | BG789923 | AW394381 | CX129589 | CF030049 |
| BW627855 | BW631137 | BG789923 | AW756639 | CX129589 | CF030934 |
| BW627855 | BW631166 | BG789923 | AW759584 | CX129589 | CF034430 |
| BW627855 | BW631179 | BG789923 | BE473562 | CX129589 | CF047669 |
| BW627855 | BW631187 | BG789923 | BF594988 | CX129589 | CF055328 |
| BW627855 | BW631220 | BG789923 | BG154916 | CX129589 | CF055516 |
| BW627855 | BW631226 | BG789923 | BG315780 | CX129589 | CF058099 |
| BW627855 | BW631268 | BG789923 | BG882505 | Zea mays | oh43     |
| BW627855 | BW631276 | BG789923 | BM085745 | EST1     | EST2     |
| BW627855 | BW631285 | BG789923 | BM092995 | AI657458 | AI674034 |
| BW627855 | BW631361 | BG789923 | BM731638 | AI664825 | BE186125 |
| BW627855 | BW631362 | BG789923 | BM892342 | AI664825 | BE186883 |
| BW627855 | BW631386 | BG789928 | AI901215 | AI664828 | BE575223 |
| BW627855 | BW631413 | BG790005 | BM885951 | AI664844 | BU037107 |
| BW627855 | BW631442 | BG790028 | BG047469 | AI664889 | AI665046 |
| BW627855 | BW631449 | BG790035 | AI495236 | AI664889 | AI833557 |
| BW627855 | BW631469 | BG790071 | BE474129 | AI664908 | AI740059 |
| BW627855 | BW631497 | BG790175 | BG881308 | AI664908 | AI833557 |
| BW627855 | BW631513 | BG790182 | AI442043 | AI664969 | AI668221 |
| BW627855 | BW631525 | BG790182 | AI507753 | AI664989 | AI665153 |
| BW627855 | BW631543 | BG790182 | AW100388 | AI664989 | AI668412 |
| BW627855 | BW631580 | BG790182 | AW201753 | AI664989 | AI668470 |
| BW627855 | BW631592 | BG790182 | AW620655 | AI664989 | AI668526 |
| BW627855 | BW631632 | BG790182 | BF009265 | AI664989 | AI670207 |
| BW627855 | BW631634 | BG790182 | BG316395 | AI664989 | AI677068 |
| BW627855 | BW631678 | BG790182 | BG789559 | AI664989 | AI677099 |
| BW627855 | BW631716 | BG790182 | BG790912 | AI664989 | AI677157 |
| BW627855 | BW631764 | BG790182 | CA952925 | AI664989 | AI677225 |
| BW627855 | BW631766 | BG790216 | BG238359 | AI664989 | AI677266 |
| BW627855 | BW631804 | BG790216 | BI786532 | AI664989 | AI712081 |
| BW627855 | BW631844 | BG790235 | AW348251 | AI664989 | AI714568 |
| BW627855 | BW631858 | BG790239 | BM885302 | AI664989 | AI740069 |
| BW627855 | BW631862 | BG790258 | AW760232 | AI664989 | AI745797 |
| BW627855 | BW631879 | BG790258 | AW781874 | AI664989 | AI746024 |
| BW627855 | BW631953 | BG790321 | BI786077 | AI664989 | AI746095 |
| BW627855 | BW632004 | BG790354 | AW348731 | AI664989 | AI759010 |

|          |          |          |          |          |          |
|----------|----------|----------|----------|----------|----------|
| BW627855 | BW632037 | BG790387 | AW734630 | AI664989 | AI812128 |
| BW627855 | BW632105 | BG790389 | BM732780 | AI664989 | AI820229 |
| BW627855 | BW632138 | BG790397 | AW759463 | AI664989 | AI820295 |
| BW627855 | BW632231 | BG790490 | BM094546 | AI664993 | BE511009 |
| BW627855 | BW632235 | BG790522 | AI443733 | AI665018 | AI674025 |
| BW627855 | BW632256 | BG790522 | AI494797 | AI665018 | AI677551 |
| BW627855 | BW632303 | BG790544 | AW398075 | AI665018 | AI820190 |
| BW627855 | BW632312 | BG790544 | BE610472 | AI665018 | BE519074 |
| BW627855 | BW632313 | BG790544 | BI943713 | AI665018 | BE644410 |
| BW627855 | BW632317 | BG790558 | AI900954 | AI665018 | BQ293375 |
| BW627855 | BW632343 | BG790558 | AW760066 | AI665033 | AI665237 |
| BW627855 | BW632376 | BG790564 | AW570114 | AI665033 | AI668137 |
| BW627855 | BW632385 | BG790602 | BG881563 | AI665033 | AI674016 |
| BW627855 | BW632444 | BG790610 | AW099698 | AI665033 | AI795510 |
| BW627855 | BW632447 | BG790610 | AW760120 | AI665033 | AI820333 |
| BW627855 | BW632451 | BG790610 | BF010248 | AI665042 | AI665316 |
| BW627855 | BW632479 | BG790610 | BF070483 | AI665079 | AI665046 |
| BW627855 | BW632489 | BG790610 | BF424375 | AI665079 | AI833557 |
| BW627855 | BW632495 | BG790610 | BM893138 | AI665146 | AI668221 |
| BW627855 | BW632544 | BG790613 | AI460525 | AI665230 | BE575223 |
| BW627855 | BW632557 | BG790613 | BF070406 | AI665244 | BU098084 |
| BW627855 | BW632563 | BG790629 | BE440385 | AI665280 | AI668221 |
| BW627855 | BW632627 | BG790629 | BE610070 | AI665328 | AI737079 |
| BW627855 | BW632644 | BG790629 | BF068814 | AI665374 | AI668221 |
| BW627855 | BW632659 | BG790629 | BF071187 | AI665414 | AI665046 |
| BW627855 | BW632664 | BG790629 | BG238778 | AI665414 | AI833557 |
| BW627855 | BW632676 | BG790629 | BG790641 | AI665431 | AW45317  |
| BW627855 | BW632681 | BG790629 | BG790882 | AI665443 | AI737079 |
| BW627855 | BW632694 | BG790629 | BI787634 | AI665445 | AI665046 |
| BW627855 | BW632747 | BG790629 | BM885776 | AI665445 | AI833557 |
| BW627855 | BW632748 | BG790640 | AI437976 | AI665467 | AI665046 |
| BW627855 | BW632814 | BG790640 | AI441113 | AI665467 | AI665095 |
| BW627855 | BW632828 | BG790640 | AI855454 | AI665467 | AI714535 |
| BW627855 | BW632858 | BG790640 | AI856130 | AI665467 | AI740059 |
| BW627855 | BW632925 | BG790640 | AI901106 | AI665467 | AI833557 |
| BW627855 | BW632939 | BG790640 | AI901155 | AI665514 | AI665237 |
| BW627855 | BW633057 | BG790640 | AI901197 | AI665514 | AI677099 |
| BW627855 | BW633128 | BG790640 | AI938009 | AI665514 | AI677324 |
| BW627855 | BW633223 | BG790640 | AI938146 | AI665514 | AI737110 |
| BW627855 | BW633247 | BG790640 | AW310926 | AI665514 | AI795510 |
| BW627855 | BW633268 | BG790640 | AW349537 | AI665514 | AI820333 |
| BW627855 | BW633269 | BG790640 | AW394381 | AI665551 | AI668503 |
| BW627855 | CB829190 | BG790640 | AW569719 | AI665551 | AI691525 |
| BW627873 | BW597308 | BG790640 | AW598182 | AI665551 | AI740062 |
| BW627884 | BW624004 | BG790640 | AW759584 | AI665551 | AI820190 |
| BW627884 | BW631345 | BG790640 | BE474012 | AI665551 | AW05625  |
| BW627903 | BW626925 | BG790640 | BF425347 | AI665551 | BE186451 |
| BW627912 | BW597308 | BG790640 | BG315780 | AI665551 | BQ280247 |
| BW627931 | BW628977 | BG790640 | BM892904 | AI665551 | BQ293375 |
| BW627936 | BW597308 | BG790696 | AI973974 | AI665566 | AI833399 |
| BW627998 | AW720235 | BG790696 | AI973977 | AI665579 | AI665237 |
| BW627998 | BW623088 | BG790744 | AI495116 | AI665579 | AI677324 |

|          |          |          |          |          |          |
|----------|----------|----------|----------|----------|----------|
| BW627998 | BW624069 | BG790776 | AW756933 | AI665579 | AI737110 |
| BW627998 | BW625056 | BG790776 | BI974262 | AI665579 | AI795510 |
| BW627998 | BW626246 | BG790827 | BG789482 | AI665607 | BU499813 |
| BW627998 | BW626580 | BG790854 | AI441019 | AI665616 | BU499738 |
| BW627998 | BW627420 | BG790870 | AW781828 | AI665656 | AI677373 |
| BW627998 | BW627857 | BG790940 | AI438057 | AI665690 | AI668221 |
| BW627998 | BW627947 | BG790940 | AI443800 | AI665908 | AI834722 |
| BW627998 | BW628365 | BG790940 | AI974021 | AI665928 | AI714518 |
| BW627998 | BW629747 | BG790940 | AW570114 | AI665928 | AW16555  |
| BW627998 | BW629958 | BG790940 | BG155631 | AI665945 | AI833619 |
| BW627998 | BW631019 | BG790958 | AW756933 | AI665945 | BU080378 |
| BW627998 | BW632865 | BG790958 | CA953347 | AI666063 | AI834722 |
| BW627998 | BW633225 | BG790970 | BF068748 | AI666115 | BQ034180 |
| BW627998 | CB827247 | BG790979 | BI786410 | AI666115 | BQ034581 |
| BW627998 | CB829655 | BG791075 | BM094734 | AI666115 | BQ034710 |
| BW628017 | BW623042 | BG791075 | CA953049 | AI666115 | BQ048055 |
| BW628138 | AW720235 | BG881393 | AW704609 | AI666115 | BQ048082 |
| BW628138 | BW623088 | BG881481 | AI495116 | AI666115 | BQ048134 |
| BW628138 | BW624069 | BG881483 | CB063834 | AI666115 | BQ279418 |
| BW628138 | BW625056 | BG881651 | AW756933 | AI666115 | BU092746 |
| BW628138 | BW626246 | BG881651 | BI974262 | AI666148 | AI834722 |
| BW628138 | BW626580 | BG881668 | BF071219 | AI666157 | BE345195 |
| BW628138 | BW627420 | BG881728 | AI460525 | AI666157 | BU037642 |
| BW628138 | BW628365 | BG881734 | AW278111 | AI666185 | AI738243 |
| BW628138 | BW629747 | BG881775 | BG790927 | AI666185 | AW42485  |
| BW628138 | BW629958 | BG881879 | CA939049 | AI666185 | BE510623 |
| BW628138 | BW632865 | BG881924 | AW756933 | AI666185 | BE552836 |
| BW628138 | CB829655 | BG882018 | AW759720 | AI666185 | BQ294161 |
| BW628172 | BW597308 | BG882032 | BF425469 | AI666185 | BQ401173 |
| BW628187 | BW597308 | BG882034 | AI856622 | AI666185 | BQ621152 |
| BW628219 | BW623042 | BG882048 | AW277739 | AI666185 | BU079889 |
| BW628319 | BW597308 | BG882053 | AW349297 | AI666185 | BU500049 |
| BW628372 | BW628977 | BG882093 | AW102373 | AI667751 | AI711919 |
| BW628376 | BW597308 | BG882093 | CA937747 | AI667828 | CA452894 |
| BW628386 | BW624004 | BG882115 | AI522910 | AI668157 | BU098084 |
| BW628386 | BW631345 | BG882124 | BM954980 | AI668236 | AI668221 |
| BW628470 | BW626925 | BG882132 | AI442747 | AI668314 | AI740059 |
| BW628544 | BW626925 | BG882202 | AW471514 | AI668314 | AI833557 |
| BW628576 | BW597308 | BG882202 | BM093442 | AI668349 | AI668221 |
| BW628628 | AW720460 | BG882204 | CB063831 | AI668364 | AI711919 |
| BW628658 | BW597308 | BG882222 | BG239025 | AI668381 | AI670632 |
| BW628691 | BW597308 | BG882222 | BG882153 | AI668381 | AI711919 |
| BW628787 | BW623042 | BG882411 | AI736604 | AI668381 | AI739970 |
| BW628914 | BW623042 | BG882451 | AW596378 | AI668381 | AI740163 |
| BW628992 | BW626925 | BG882511 | AI443264 | AI668381 | AI745782 |
| BW629166 | BW597308 | BG882543 | AI496509 | AI668381 | AI746111 |
| BW629175 | BW624026 | BG882596 | BI974040 | AI668381 | AI833833 |
| BW629175 | BW625711 | BG882884 | BF009312 | AI668384 | AI745782 |
| BW629175 | BW632499 | BG882924 | AW831264 | AI668384 | AI746077 |
| BW629335 | BW597308 | BG882926 | BG790155 | AI668413 | AI745782 |
| BW629481 | AU089541 | BG882956 | AI495116 | AI668413 | AI746077 |
| BW629546 | BW628977 | BI316254 | BF424600 | AI668413 | AI746111 |

|          |          |          |          |          |          |
|----------|----------|----------|----------|----------|----------|
| BW629567 | BW597308 | BI316254 | BG154242 | AI668433 | AI770701 |
| BW629690 | BW595586 | BI316254 | BG239315 | AI668448 | AW45315  |
| BW629715 | BW623042 | BI316254 | BG790247 | AI668540 | AI674034 |
| BW629859 | AW720235 | BI316254 | BG791131 | AI668545 | AI668221 |
| BW629859 | BW623088 | BI316254 | BG882462 | AI670154 | AW52028  |
| BW629859 | BW624069 | BI316254 | BM885205 | AI670154 | AW56621  |
| BW629859 | BW625056 | BI316274 | AW596878 | AI670162 | AI833399 |
| BW629859 | BW626246 | BI316274 | BI785346 | AI670171 | BQ539600 |
| BW629859 | BW626580 | BI316277 | AW101691 | AI670291 | AI665046 |
| BW629859 | BW627420 | BI316281 | AW760016 | AI670291 | AI740059 |
| BW629859 | BW627857 | BI316371 | AW831762 | AI670291 | AI833557 |
| BW629859 | BW628365 | BI316467 | AW756933 | AI670298 | AI674034 |
| BW629859 | BW629747 | BI316514 | BG882625 | AI670299 | AI737079 |
| BW629859 | BW629958 | BI316562 | BM732780 | AI670327 | AI737079 |
| BW629859 | BW632865 | BI316577 | AW132259 | AI670360 | BE186873 |
| BW629859 | CB827247 | BI316577 | AW186512 | AI670360 | BE510164 |
| BW629859 | CB829655 | BI316577 | AW596697 | AI670367 | AI668221 |
| BW629877 | BW623042 | BI316577 | AW733932 | AI670380 | BE186659 |
| BW629892 | AW720118 | BI316577 | AW759232 | AI670413 | AI676849 |
| BW629892 | BI417753 | BI316577 | AW760037 | AI670526 | AI676849 |
| BW629892 | BW622817 | BI316577 | BE473638 | AI670586 | AI667866 |
| BW629892 | BW629389 | BI316577 | BG316166 | AI670646 | AI668221 |
| BW629892 | BW630327 | BI316577 | BG789994 | AI670670 | AI692016 |
| BW629892 | BW630338 | BI320421 | AW620211 | AI670670 | BE345195 |
| BW629894 | BW627659 | BI321070 | BI972604 | AI673866 | AI668221 |
| BW629939 | BW628977 | BI321147 | AI496396 | AI673887 | AI745782 |
| BW630071 | BW597308 | BI321147 | AI736604 | AI673898 | AI668221 |
| BW630208 | BW626120 | BI321276 | BE347238 | AI673911 | BU499510 |
| BW630318 | BW599651 | BI321311 | BI972604 | AI673956 | AI711919 |
| BW630318 | BW626599 | BI321948 | CA953216 | AI673974 | BE639719 |
| BW630318 | BW627709 | BI321948 | CA953339 | AI673977 | AI746111 |
| BW630449 | BW630253 | BI321988 | BF425507 | AI673991 | BE224945 |
| BW630556 | BW597308 | BI424437 | BI787520 | AI673991 | BE345490 |
| BW630566 | BW626925 | BI424455 | AW568734 | AI673991 | BE345491 |
| BW630620 | BW624069 | BI424455 | AW761071 | AI673991 | BQ294090 |
| BW630620 | BW625056 | BI424455 | BF010100 | AI673991 | BU037952 |
| BW630620 | BW626246 | BI424455 | BG790280 | AI673991 | BU079820 |
| BW630620 | BW627420 | BI424455 | BG790913 | AI673991 | BU499958 |
| BW630620 | BW627947 | BI424455 | BI425463 | AI674005 | BE345195 |
| BW630620 | BW631019 | BI424455 | BI973156 | AI674010 | AI665237 |
| BW630620 | BW633225 | BI425429 | BG882363 | AI674010 | AI668137 |
| BW630620 | CB827247 | BI425439 | BI972604 | AI674010 | AI677324 |
| BW630620 | CB829655 | BI425461 | AI496396 | AI674010 | AI737110 |
| BW630851 | BW621623 | BI425461 | AI736604 | AI674010 | AI795289 |
| BW630851 | BW627152 | BI425482 | AW397683 | AI674010 | AI795510 |
| BW630912 | BW597308 | BI425487 | AI736604 | AI674010 | AI820333 |
| BW631015 | AW163970 | BI425517 | AI441060 | AI676895 | AI666187 |
| BW631015 | AW720603 | BI425517 | AW761071 | AI676895 | AI739819 |
| BW631015 | BI417391 | BI425517 | BG790280 | AI676907 | AI740163 |
| BW631015 | BI417489 | BI425517 | BI426366 | AI676907 | AI746111 |
| BW631015 | BI417510 | BI425517 | BI973156 | AI676969 | AI740163 |
| BW631015 | BI417576 | BI425525 | BI785534 | AI676969 | AI745782 |

|          |          |          |          |          |          |
|----------|----------|----------|----------|----------|----------|
| BW631015 | BI417868 | BI425544 | AI496396 | AI676969 | AI746077 |
| BW631015 | BI418131 | BI425544 | AI736604 | AI676994 | AI665153 |
| BW631015 | BI418432 | BI426336 | BM892192 | AI676994 | AI665200 |
| BW631015 | BI418776 | BI426346 | BU090853 | AI676994 | AI665452 |
| BW631015 | BI418781 | BI426393 | AI736604 | AI676994 | AI665514 |
| BW631015 | BI418849 | BI469766 | AI496396 | AI676994 | AI665579 |
| BW631015 | BI419340 | BI469766 | AI736604 | AI676994 | AI670553 |
| BW631015 | BI420614 | BI469776 | AI441060 | AI676994 | AI739849 |
| BW631015 | BI420615 | BI469776 | AW568734 | AI676994 | AI745797 |
| BW631015 | BI420623 | BI469776 | AW761071 | AI676994 | AI759029 |
| BW631015 | BI420725 | BI469776 | BF010100 | AI676994 | AI759069 |
| BW631015 | BI420917 | BI469776 | BG790913 | AI676994 | AI795435 |
| BW631015 | BW596292 | BI469776 | BI425463 | AI676994 | AI812244 |
| BW631015 | BW623516 | BI469851 | AW348358 | AI676994 | AW07649  |
| BW631015 | BW624891 | BI469867 | AI736604 | AI676995 | BU102349 |
| BW631015 | BW625411 | BI469905 | AI988329 | AI677000 | AI740163 |
| BW631015 | BW625446 | BI469905 | AW185421 | AI677000 | AI745782 |
| BW631015 | BW625989 | BI469959 | AW351162 | AI677000 | AI746077 |
| BW631015 | BW630067 | BI469994 | AI901200 | AI677000 | AI746111 |
| BW631015 | BW631388 | BI470030 | AI496396 | AI677007 | AI737079 |
| BW631015 | BW632099 | BI470038 | BI972604 | AI677017 | BE509864 |
| BW631015 | BW632616 | BI470092 | AI443660 | AI677017 | BQ487003 |
| BW631015 | BW632666 | BI470104 | AI736604 | AI677029 | AI657481 |
| BW631015 | BW632690 | BI470104 | AI901200 | AI677029 | AI665193 |
| BW631015 | CB826633 | BI470106 | AW757349 | AI677029 | AI665322 |
| BW631015 | CN825136 | BI470106 | BM893385 | AI677029 | AI665341 |
| BW631042 | BW628764 | BI471735 | CB063831 | AI677029 | AI665689 |
| BW631063 | BW624004 | BI471775 | AW760640 | AI677029 | AI668310 |
| BW631142 | BW626925 | BI471811 | AW201242 | AI677029 | AI670374 |
| BW631159 | BW623042 | BI785098 | BM094734 | AI677029 | AI670639 |
| BW631169 | BW626407 | BI785104 | BI974016 | AI677029 | AI673980 |
| BW631169 | BW628098 | BI785145 | AW756933 | AI677029 | AI677041 |
| BW631169 | BW632519 | BI785201 | BM732780 | AI677029 | AI677561 |
| BW631260 | BW624004 | BI785239 | AW279471 | AI677029 | AI711758 |
| BW631440 | BG662402 | BI785239 | BG881454 | AI677029 | AI712134 |
| BW631731 | BW624004 | BI785239 | BI973556 | AI677029 | AI712258 |
| BW631731 | BW631345 | BI785327 | BM893493 | AI677029 | AI737632 |
| BW631741 | BW597308 | BI785357 | BG882625 | AI677029 | AI740118 |
| BW631757 | BW628977 | BI785395 | CA953509 | AI677029 | AI745759 |
| BW631776 | BI418088 | BI785535 | BM731819 | AI677029 | AI745828 |
| BW631779 | BW628977 | BI785542 | AI461194 | AI677029 | AI746010 |
| BW631826 | BW595373 | BI785542 | AW277376 | AI677029 | AI746206 |
| BW631826 | BW621832 | BI785542 | AW704946 | AI677029 | AI795452 |
| BW631826 | BW627400 | BI785542 | BI973964 | AI677029 | AI833601 |
| BW631861 | BW599651 | BI785542 | BM885009 | AI677029 | AI833735 |
| BW631861 | BW622352 | BI785548 | AW704609 | AI677029 | AI854950 |
| BW631861 | BW627709 | BI785578 | BM893010 | AI677037 | AI668221 |
| BW631861 | BW627831 | BI785600 | AW704609 | AI677055 | AI712114 |
| BW631861 | BW631510 | BI785643 | BI786253 | AI677055 | AI833528 |
| BW631938 | BW597308 | BI785643 | CA939065 | AI677055 | AI833747 |
| BW631961 | BW626925 | BI785674 | BG790963 | AI677055 | AI920626 |
| BW631987 | AU252174 | BI785725 | BM955026 | AI677055 | AI939772 |



|          |          |          |          |          |          |
|----------|----------|----------|----------|----------|----------|
| BW632001 | BW599651 | BI785859 | BI973386 | AI677055 | AW26755  |
| BW632001 | BW627709 | BI785950 | BF068840 | AI677109 | AI668221 |
| BW632001 | BW627831 | BI785974 | AI495116 | AI677155 | BE186434 |
| BW632001 | BW631510 | BI785997 | BG882625 | AI677155 | BE510589 |
| BW632028 | BW597308 | BI785997 | BI786492 | AI677155 | BE510590 |
| BW632121 | CB829655 | BI786045 | BF425675 | AI677155 | BE511783 |
| BW632165 | BI419783 | BI786047 | BG882625 | AI677155 | BE511784 |
| BW632165 | BW621520 | BI786047 | BI786492 | AI677155 | BQ401239 |
| BW632165 | BW621536 | BI786081 | BG882625 | AI677155 | BQ486585 |
| BW632165 | BW621538 | BI786113 | BE610292 | AI677155 | BU036852 |
| BW632165 | BW621724 | BI786113 | BU090698 | AI677155 | BU080404 |
| BW632165 | BW622101 | BI786166 | AI495065 | AI677155 | BU092384 |
| BW632165 | BW622188 | BI786328 | BF010140 | AI677155 | BU092385 |
| BW632165 | BW622210 | BI786396 | BE347347 | AI677155 | BU092657 |
| BW632165 | BW622355 | BI786465 | AW756933 | AI677178 | AI739942 |
| BW632165 | BW622381 | BI786522 | BG881608 | AI677178 | BE510049 |
| BW632165 | BW622597 | BI786565 | BI786492 | AI677178 | BE512176 |
| BW632165 | BW622842 | BI786569 | BG882625 | AI677178 | BE639720 |
| BW632165 | BW623879 | BI786647 | AW569285 | AI677178 | BQ667840 |
| BW632165 | BW624682 | BI786738 | BM093266 | AI677178 | BQ779399 |
| BW632165 | BW624772 | BI786743 | AW459931 | AI677178 | BQ779400 |
| BW632165 | BW624935 | BI787375 | AI494932 | AI677260 | BE345195 |
| BW632165 | BW625105 | BI787392 | AW277739 | AI677278 | AI812158 |
| BW632165 | BW625609 | BI787429 | BE440408 | AI677278 | AI812190 |
| BW632165 | BW625743 | BI787577 | AW185778 | AI677278 | AI812198 |
| BW632165 | BW626004 | BI787577 | AW277513 | AI677296 | BQ293816 |
| BW632165 | BW626066 | BI787577 | BG238895 | AI677296 | BQ294082 |
| BW632165 | BW626349 | BI787577 | BM085554 | AI677296 | CA453100 |
| BW632165 | BW626598 | BI787638 | AI496396 | AI677313 | AI665046 |
| BW632165 | BW626738 | BI787638 | AI736604 | AI677313 | AI740059 |
| BW632165 | BW626907 | BI787643 | CA953049 | AI677313 | AI833557 |
| BW632165 | BW627224 | BI787688 | BG882625 | AI677316 | AI745782 |
| BW632165 | BW627245 | BI787690 | AI900892 | AI677316 | AI746077 |
| BW632165 | BW627410 | BI787690 | BI785589 | AI677317 | AI745782 |
| BW632165 | BW627742 | BI787707 | AW278610 | AI677317 | AI746077 |
| BW632165 | BW627988 | BI788113 | AW278335 | AI677330 | AI833690 |
| BW632165 | BW628479 | BI892510 | AW102089 | AI677346 | AI668221 |
| BW632165 | BW629136 | BI892703 | BF009337 | AI677381 | AI668221 |
| BW632165 | BW629342 | BI892704 | AW760925 | AI677401 | AW52028  |
| BW632165 | BW629584 | BI892778 | AW317698 | AI677410 | AI740163 |
| BW632165 | BW629711 | BI892778 | AW317947 | AI677440 | AI665046 |
| BW632165 | BW629765 | BI941774 | BG789525 | AI677440 | AI740059 |
| BW632165 | BW629938 | BI942164 | BF009337 | AI677440 | AI833557 |
| BW632165 | BW630356 | BI942189 | BI942580 | AI677451 | AI668221 |
| BW632165 | BW630400 | BI942189 | BI942792 | AI677459 | AI745782 |
| BW632165 | BW630665 | BI942189 | BI944453 | AI677484 | AI665200 |
| BW632165 | BW630865 | BI942189 | CA953398 | AI677558 | BE186125 |
| BW632165 | BW631423 | BI942439 | AI443264 | AI677558 | BE186883 |
| BW632165 | BW631480 | BI942555 | BF009337 | AI677588 | BQ294204 |
| BW632165 | BW631640 | BI942837 | AW832262 | AI677588 | BU036877 |
| BW632165 | BW632029 | BI943144 | AW832262 | AI677590 | AI665046 |
| BW632165 | BW632154 | BI943328 | BI942092 | AI677590 | AI740059 |

|          |          |          |          |          |          |
|----------|----------|----------|----------|----------|----------|
| BW632165 | BW632183 | BI943436 | BM885049 | AI677590 | AI833557 |
| BW632165 | BW632362 | BI943668 | AI442880 | AI677611 | BE575063 |
| BW632165 | BW632368 | BI943673 | AI442897 | AI691170 | AI738243 |
| BW632165 | BW632552 | BI943673 | AI496509 | AI691170 | AW42485  |
| BW632165 | BW633058 | BI943673 | AW100869 | AI691170 | BE510595 |
| BW632174 | BW631055 | BI943673 | AW307493 | AI691170 | BE510623 |
| BW632215 | BW624004 | BI943761 | AW705104 | AI691170 | BE552836 |
| BW632272 | BW597308 | BI943770 | BI674259 | AI691170 | BQ294161 |
| BW632516 | BW597308 | BI943770 | BI942184 | AI691170 | BQ295658 |
| BW632555 | BW597308 | BI943773 | AI442128 | AI691170 | BQ401173 |
| BW632569 | CN825076 | BI943773 | AI494998 | AI691170 | BQ401206 |
| BW632634 | BW625515 | BI943792 | BI787520 | AI691170 | BQ621080 |
| BW632660 | BW597308 | BI943807 | CA953325 | AI691170 | BQ621152 |
| BW632870 | BW628977 | BI943924 | AI736322 | AI691170 | BU079889 |
| BW632965 | BW624004 | BI943924 | BG790949 | AI691170 | BU500049 |
| BW632965 | BW631345 | BI944087 | AI443733 | AI691329 | AI834722 |
| BW633021 | BW621816 | BI944097 | BM885049 | AI691335 | BU037107 |
| BW633021 | BW621818 | BI944108 | BM885049 | AI691356 | AW05433  |
| BW633048 | BW597308 | BI944109 | AW350570 | AI691356 | AW05630  |
| BW633183 | BW624004 | BI944109 | BF070700 | AI691356 | AW36067  |
| BW633286 | BW625090 | BI944109 | BI786491 | AI691356 | AW51985  |
| CB826660 | BW629698 | BI944133 | AI441053 | AI691361 | AI737079 |
| CB826660 | BW631022 | BI944133 | AI442821 | AI691389 | AI691746 |
| CB826660 | BW632413 | BI944133 | AI443084 | AI691466 | AI691974 |
| CB826673 | BW629698 | BI944133 | AI443756 | AI691499 | AI833619 |
| CB826673 | BW631022 | BI944133 | AI460853 | AI691499 | BU080378 |
| CB826673 | BW632413 | BI944133 | AI960078 | AI691571 | AI665707 |
| CB826683 | BW626925 | BI944133 | AW350046 | AI691571 | AI670658 |
| CB826718 | BW595261 | BI944177 | AW348731 | AI691571 | AI740119 |
| CB826718 | BW624664 | BI944184 | AI901200 | AI691571 | AI745930 |
| CB826719 | BI418363 | BI944499 | BM885049 | AI691571 | AW36063  |
| CB826796 | CB826881 | BI944507 | AW832262 | AI691571 | AW50693  |
| CB826796 | CB828834 | BI944509 | AW132538 | AI691571 | AW60037  |
| CB826806 | CB829422 | BI944980 | BM732746 | AI691571 | BE344921 |
| CB826814 | CB827652 | BI944980 | BU090289 | AI691571 | BE509913 |
| CB826815 | CB826881 | BI944985 | BI787691 | AI691571 | BQ164247 |
| CB826815 | CB828834 | BI945217 | CA953216 | AI691571 | BU571936 |
| CB826834 | CB826881 | BI945217 | CA953339 | AI691584 | AI691575 |
| CB826838 | CB828834 | BI945382 | AW318141 | AI691584 | AI691974 |
| CB826838 | CB829422 | BI945585 | AW396453 | AI691593 | AI941535 |
| CB826848 | CB826881 | BI945585 | BG154992 | AI691604 | AI737348 |
| CB826848 | CB828834 | BI945874 | BG882625 | AI691630 | AI691746 |
| CB826852 | CB826881 | BI946139 | BI471805 | AI691708 | AI691184 |
| CB826852 | CB828834 | BI972416 | BM094734 | AI691708 | AI691192 |
| CB826875 | CB826881 | BI972419 | AW308980 | AI691708 | AI834599 |
| CB826875 | CB828834 | BI972419 | AW459931 | AI691725 | AI691947 |
| CB826883 | CB827687 | BI972436 | AW759220 | AI691776 | AI691824 |
| CB826883 | CB828169 | BI972440 | AW704612 | AI691859 | BQ294055 |
| CB826911 | CB826881 | BI972440 | BI972961 | AI691859 | BQ744601 |
| CB826911 | CB828834 | BI972450 | AI794922 | AI691859 | BU101442 |
| CB826919 | CB827652 | BI972451 | BG047136 | AI691871 | AI691959 |
| CB826919 | CB828169 | BI972453 | CA953139 | AI691871 | AI714834 |

|          |          |          |          |          |          |
|----------|----------|----------|----------|----------|----------|
| CB826923 | CB826881 | BI972546 | AW781828 | AI691871 | AI714863 |
| CB826923 | CB828834 | BI972565 | BF425699 | AI691871 | AI738165 |
| CB826963 | CB826881 | BI972730 | BI787425 | AI691871 | AI738241 |
| CB826965 | CB826881 | BI972738 | AW831762 | AI691884 | AI834599 |
| CB826965 | CB829422 | BI972749 | AW756933 | AI691906 | AI714509 |
| CB826987 | CB827687 | BI972749 | BI974262 | AI691908 | AI714910 |
| CB826987 | CB828169 | BI972793 | BG881461 | AI691908 | AI834577 |
| CB827020 | CB826881 | BI972817 | BF068748 | AI691908 | BQ034366 |
| CB827020 | CB828834 | BI972851 | BG238584 | AI691953 | AI714823 |
| CB827022 | CB829422 | BI972857 | BI785651 | AI691953 | AI734520 |
| CB827031 | CB828834 | BI972857 | BI786287 | AI691959 | AI714863 |
| CB827034 | CB828834 | BI972857 | BI973249 | AI692086 | AI833690 |
| CB827035 | CB826881 | BI972871 | BI973119 | AI711674 | AI668221 |
| CB827035 | CB828834 | BI972914 | AW705025 | AI711677 | AI834722 |
| CB827040 | CB828834 | BI972920 | AI494807 | AI711723 | BE510110 |
| CB827043 | CB826881 | BI972920 | AW459994 | AI711764 | AI665046 |
| CB827043 | CB828834 | BI972941 | AI960073 | AI711764 | AI833557 |
| CB827052 | CB826881 | BI972941 | AI966221 | AI711795 | BU197944 |
| CB827052 | CB828834 | BI972941 | BE610450 | AI711803 | AI657418 |
| CB827067 | CB828834 | BI972941 | BE804557 | AI711816 | AI677277 |
| CB827074 | CB828834 | BI972941 | BF426095 | AI711833 | BU037107 |
| CB827076 | BP064188 | BI972941 | BG154911 | AI711850 | AI677373 |
| CB827076 | BP075581 | BI972941 | BG155152 | AI711900 | AI737170 |
| CB827081 | CB826881 | BI972941 | BG237075 | AI711900 | AI833557 |
| CB827083 | BP061882 | BI972941 | CA802377 | AI712087 | AI737079 |
| CB827083 | BP073555 | BI972941 | CA937697 | AI712126 | AI665707 |
| CB827083 | BP074444 | BI972958 | AI736604 | AI712126 | AI670658 |
| CB827093 | CB826881 | BI972968 | AW307499 | AI712126 | AI740119 |
| CB827104 | CB828834 | BI972968 | BE807178 | AI712126 | AI745930 |
| CB827107 | CB826881 | BI972968 | BI425531 | AI712126 | AW36063  |
| CB827107 | CB829422 | BI972968 | BI426381 | AI712126 | AW50693  |
| CB827124 | CB826881 | BI972968 | BI892671 | AI712126 | AW60037  |
| CB827127 | CB826881 | BI972968 | BI943984 | AI712126 | BE344921 |
| CB827144 | CB826881 | BI972968 | BM892032 | AI712126 | BE509913 |
| CB827151 | CB826881 | BI972968 | CA938888 | AI712126 | BQ164247 |
| CB827151 | CB828834 | BI973114 | AI441060 | AI712126 | BU571936 |
| CB827152 | CB827687 | BI973114 | AW761071 | AI712284 | AI665452 |
| CB827152 | CB828169 | BI973114 | BG790280 | AI712284 | AI665514 |
| CB827166 | CB828834 | BI973114 | BI973156 | AI712284 | AI665579 |
| CB827179 | CB828834 | BI973146 | AW756933 | AI712284 | AI670553 |
| CB827179 | CB829422 | BI973226 | BG881461 | AI712284 | AI677068 |
| CB827190 | CB826881 | BI973237 | CB063831 | AI712284 | AI711803 |
| CB827204 | CB826881 | BI973262 | AI496396 | AI712284 | AI739849 |
| CB827204 | CB828834 | BI973295 | AW132989 | AI712284 | AI739859 |
| CB827213 | CB826881 | BI973295 | AW201779 | AI712284 | AI759069 |
| CB827213 | CB828834 | BI973295 | AW758994 | AI712284 | AI759073 |
| CB827215 | CB826881 | BI973295 | AW781851 | AI712284 | AI795435 |
| CB827215 | CB828834 | BI973295 | AW782128 | AI714379 | AI746223 |
| CB827221 | CB826881 | BI973295 | BG316352 | AI714402 | BQ486916 |
| CB827221 | CB828834 | BI973295 | BM892132 | AI714405 | AW16549  |
| CB827225 | CB827687 | BI973295 | BM892339 | AI714432 | AI834722 |
| CB827229 | CB826881 | BI973295 | BM954074 | AI714470 | AI834687 |

|          |          |          |          |          |          |
|----------|----------|----------|----------|----------|----------|
| CB827229 | CB828834 | BI973306 | BM954226 | AI714480 | BU197944 |
| CB827230 | CB826881 | BI973405 | AW279075 | AI714540 | AI668221 |
| CB827250 | CB826881 | BI973405 | BE059975 | AI714625 | AI668221 |
| CB827250 | CB828834 | BI973405 | BM885720 | AI714637 | AW06751  |
| CB827259 | CB827942 | BI973405 | CA782180 | AI714638 | BE186873 |
| CB827262 | BI419940 | BI973409 | AW760462 | AI714638 | BE510164 |
| CB827276 | CB826881 | BI973412 | AI522871 | AI714641 | BE186873 |
| CB827284 | CB828834 | BI973418 | AW201956 | AI714641 | BE510164 |
| CB827302 | CB826881 | BI973443 | AW831762 | AI714651 | AI668221 |
| CB827308 | CB826881 | BI973489 | AW756933 | AI714679 | AI746223 |
| CB827321 | CB826881 | BI973489 | BI974262 | AI714756 | AI691447 |
| CB827346 | CB829296 | BI973489 | CA953347 | AI714812 | AI691588 |
| CB827349 | CB828834 | BI973491 | CB063831 | AI714812 | AI834646 |
| CB827349 | CB829422 | BI973492 | CA953347 | AI714812 | AW35258  |
| CB827351 | CB826881 | BI973538 | BI974262 | AI714812 | AW50662  |
| CB827351 | CB829422 | BI973538 | CA953347 | AI714812 | BE640205 |
| CB827352 | CB826881 | BI973564 | AW597091 | AI714812 | BQ279735 |
| CB827354 | CB826881 | BI973606 | AW756933 | AI714812 | BQ401189 |
| CB827354 | CB828834 | BI973606 | CA953347 | AI714812 | BQ668271 |
| CB827356 | CB826881 | BI973619 | AW597091 | AI714812 | BQ744780 |
| CB827357 | CB828376 | BI973619 | BM731640 | AI714812 | BQ778999 |
| CB827357 | CB829422 | BI973729 | AI494673 | AI714812 | BQ779016 |
| CB827367 | CB826881 | BI973840 | AW471521 | AI714812 | BQ779086 |
| CB827367 | CB828834 | BI973840 | AW734835 | AI714812 | BU036847 |
| CB827370 | CB826881 | BI973840 | AW757175 | AI714812 | BU037622 |
| CB827370 | CB828834 | BI973840 | BF010223 | AI714812 | BU079797 |
| CB827377 | CB826881 | BI973944 | AI460547 | AI714812 | BU092380 |
| CB827377 | CB828834 | BI973975 | BI785494 | AI714812 | BU499346 |
| CB827378 | CB827687 | BI973994 | AI443370 | AI714834 | AI714863 |
| CB827378 | CB828169 | BI973994 | AI460797 | AI714834 | AI834599 |
| CB827392 | CB826881 | BI973994 | AW101313 | AI714866 | AI691746 |
| CB827392 | CB829422 | BI973994 | BI321246 | AI714946 | BE224945 |
| CB827396 | CB826881 | BI973994 | BI972698 | AI714946 | BE345490 |
| CB827400 | CB826881 | BI973994 | BM890838 | AI714946 | BE345491 |
| CB827400 | CB828834 | BI974028 | BE475651 | AI714946 | BQ486631 |
| CB827401 | BI420232 | BI974042 | AW756933 | AI714946 | BU037952 |
| CB827408 | CB827652 | BI974078 | AW756933 | AI714946 | BU079820 |
| CB827410 | CB826881 | BI974078 | CA953347 | AI714946 | BU499958 |
| CB827416 | CB826881 | BI974101 | BM094734 | AI714959 | AW16549  |
| CB827417 | CB829422 | BI974166 | AW185393 | AI734322 | AW17200  |
| CB827427 | CB828834 | BI974186 | BM094734 | AI734347 | AW30868  |
| CB827430 | CB826881 | BI974186 | CA953049 | AI734375 | AI734340 |
| CB827430 | CB828834 | BI974253 | CA953347 | AI734388 | BE511820 |
| CB827434 | CB826881 | BI974277 | BI787537 | AI734497 | AI691387 |
| CB827434 | CB828834 | BI974311 | BE474932 | AI734520 | AI714823 |
| CB827443 | CB826881 | BI974349 | BI787520 | AI734542 | AI737348 |
| CB827443 | CB828834 | BI974390 | BI946063 | AI734571 | BU037107 |
| CB827452 | CB828834 | BI974398 | BM886141 | AI734635 | AI737079 |
| CB827453 | CB826881 | BI974431 | BE475204 | AI734715 | AI666205 |
| CB827453 | CB828834 | BI974454 | AI416608 | AI734715 | AI691307 |
| CB827474 | BI419940 | BI974454 | AW132261 | AI734715 | AI737802 |
| CB827499 | CB827864 | BI974454 | AW307036 | AI734715 | AI738123 |

|          |          |          |          |          |          |
|----------|----------|----------|----------|----------|----------|
| CB827500 | CB828834 | BI974454 | BI972635 | AI734715 | AI738243 |
| CB827505 | BW596388 | BI974454 | BI973407 | AI734715 | AI738279 |
| CB827505 | BW597072 | BI974454 | CA803044 | AI734715 | AI770632 |
| CB827515 | CB826881 | BI974458 | AI443733 | AI734715 | AI881973 |
| CB827515 | CB828834 | BI974458 | AI495703 | AI734715 | AW06218  |
| CB827558 | BI418998 | BM085062 | CB063480 | AI734715 | AW42485  |
| CB827558 | BW598090 | BM085100 | BE440385 | AI734715 | BE510595 |
| CB827558 | BW599696 | BM085100 | BE440507 | AI734715 | BE510623 |
| CB827558 | CB828479 | BM085100 | BE610070 | AI734715 | BE552836 |
| CB827561 | CB828376 | BM085100 | BF068814 | AI734715 | BE639901 |
| CB827561 | CB829422 | BM085100 | BF071187 | AI734715 | BQ294161 |
| CB827566 | BW628977 | BM085100 | BG238778 | AI734715 | BQ295624 |
| CB827569 | CB826881 | BM085100 | BG790511 | AI734715 | BQ401173 |
| CB827581 | CB829422 | BM085100 | BG790641 | AI734715 | BQ621080 |
| CB827583 | CB826881 | BM085100 | BG790857 | AI734715 | BQ621152 |
| CB827583 | CB828834 | BM085100 | BG790882 | AI734715 | BU079889 |
| CB827584 | CB826881 | BM085100 | BI316606 | AI734715 | BU099024 |
| CB827584 | CB829422 | BM085100 | BI786412 | AI734715 | BU500049 |
| CB827588 | CB826881 | BM085100 | BI787634 | AI734725 | AI834722 |
| CB827588 | CB828834 | BM085100 | BI972780 | AI734769 | AW49806  |
| CB827596 | CB827772 | BM085100 | BM885566 | AI734810 | AW56254  |
| CB827608 | AU254058 | BM085100 | BM885776 | AI734810 | AW56262  |
| CB827608 | AW720557 | BM085128 | BI972504 | AI734810 | BQ703359 |
| CB827608 | BI419164 | BM085130 | BE440385 | AI737105 | AI820319 |
| CB827608 | BI419752 | BM085130 | BE610070 | AI737120 | AI737079 |
| CB827608 | BI420929 | BM085130 | BF068814 | AI737381 | AI943709 |
| CB827608 | BP062762 | BM085130 | BF071187 | AI737381 | BE511111 |
| CB827608 | BP062844 | BM085130 | BG238778 | AI737452 | BE511437 |
| CB827608 | BP063555 | BM085130 | BG790641 | AI737684 | AI711919 |
| CB827608 | BP063670 | BM085130 | BG790882 | AI737688 | BQ280136 |
| CB827608 | BP064312 | BM085130 | BI787634 | AI737709 | AI665046 |
| CB827608 | BP064378 | BM085130 | BM885776 | AI737709 | AI833557 |
| CB827608 | BP064419 | BM085176 | BG316158 | AI737713 | BU499738 |
| CB827608 | BP064538 | BM085176 | BM892192 | AI737744 | AI668221 |
| CB827608 | BP064778 | BM085176 | CA953216 | AI737827 | AI737079 |
| CB827608 | BP064830 | BM085204 | AI443696 | AI737897 | BU093663 |
| CB827608 | BP064937 | BM085204 | BG881520 | AI737932 | AI666187 |
| CB827608 | BP065058 | BM085205 | CB063741 | AI737963 | AI668221 |
| CB827608 | BP065161 | BM085211 | AI443733 | AI737987 | AI674034 |
| CB827608 | BP065397 | BM085242 | BM143190 | AI737988 | AI737692 |
| CB827608 | BP065827 | BM085252 | BE475291 | AI737997 | AI740059 |
| CB827608 | BP066165 | BM085332 | AI494797 | AI738224 | AI667787 |
| CB827608 | BP066496 | BM085412 | BG316158 | AI738241 | AI714863 |
| CB827608 | BP066974 | BM085412 | BM892192 | AI738268 | BU080447 |
| CB827608 | BP067372 | BM085412 | CA953216 | AI738275 | AI714509 |
| CB827608 | BP068270 | BM085432 | AW756933 | AI738275 | BM41673  |
| CB827608 | CB826861 | BM085495 | BI316576 | AI738298 | AI714823 |
| CB827608 | CB827038 | BM085715 | BM085101 | AI738298 | AI734520 |
| CB827608 | CB827363 | BM085801 | AI736604 | AI738323 | AI834722 |
| CB827608 | CB827388 | BM085816 | BF009312 | AI738333 | AI833619 |
| CB827608 | CB827404 | BM092875 | BI787520 | AI738333 | BU080378 |
| CB827608 | CB827546 | BM092910 | BI787520 | AI738376 | AI691323 |

|          |          |          |          |          |          |
|----------|----------|----------|----------|----------|----------|
| CB827608 | CB827649 | BM092962 | BF010106 | AI739796 | AI738281 |
| CB827608 | CB827838 | BM092962 | BI316320 | AI739838 | AI665046 |
| CB827608 | CB828044 | BM093072 | BM732780 | AI739838 | AI740059 |
| CB827608 | CB828078 | BM093095 | BM884979 | AI739838 | AI833557 |
| CB827608 | CB828198 | BM093123 | BM732780 | AI739849 | AI665237 |
| CB827608 | CB828234 | BM093229 | AW705419 | AI739849 | AI677324 |
| CB827608 | CB828257 | BM093229 | BI973331 | AI739849 | AI737110 |
| CB827608 | CB828681 | BM093247 | BG882625 | AI739849 | AI795510 |
| CB827608 | CB829554 | BM093247 | BI786492 | AI739849 | AI820333 |
| CB827613 | CB829422 | BM093287 | BG789482 | AI739859 | AI677099 |
| CB827619 | CB826881 | BM093295 | BG881628 | AI739859 | AI711786 |
| CB827619 | CB828834 | BM093295 | BI785699 | AI739907 | AI745782 |
| CB827633 | CB826881 | BM093295 | BM731958 | AI739940 | BQ539600 |
| CB827633 | CB828834 | BM093355 | BI974262 | AI739987 | BE186873 |
| CB827639 | CB829296 | BM093369 | AW278111 | AI739987 | BE510164 |
| CB827648 | CB826881 | BM093382 | BG882363 | AI739991 | AI665046 |
| CB827648 | CB828834 | BM093430 | AW132675 | AI739991 | AI833557 |
| CB827653 | CB826836 | BM093430 | AW185673 | AI740026 | AI657480 |
| CB827653 | CB828287 | BM093430 | AW201881 | AI740026 | AI665200 |
| CB827660 | CB828201 | BM093430 | AW277525 | AI740026 | AI665452 |
| CB827664 | CB826881 | BM093430 | BF424836 | AI740026 | AI665514 |
| CB827664 | CB829422 | BM093430 | BI942218 | AI740026 | AI665579 |
| CB827679 | CB826881 | BM093430 | BI942226 | AI740026 | AI670553 |
| CB827685 | CB826881 | BM093430 | BI942291 | AI740026 | AI677068 |
| CB827692 | CB829422 | BM093430 | BI942581 | AI740026 | AI712167 |
| CB827696 | CB828834 | BM093430 | BI942804 | AI740026 | AI739849 |
| CB827698 | CB826881 | BM093509 | AI443733 | AI740026 | AI739859 |
| CB827698 | CB828834 | BM093521 | BI785225 | AI740026 | AI759069 |
| CB827699 | CB829430 | BM093537 | BG315859 | AI740026 | AI759073 |
| CB827700 | CB826881 | BM093554 | BI974108 | AI740033 | AI668221 |
| CB827708 | CB827772 | BM093689 | BI944400 | AI740042 | BE510425 |
| CB827714 | BP059197 | BM093717 | CA953216 | AI740075 | AW17200  |
| CB827716 | CB828834 | BM093717 | CA953339 | AI740082 | AW50675  |
| CB827716 | CB829422 | BM094360 | AI507717 | AI740082 | AW50675  |
| CB827718 | CB826881 | BM094371 | BE347400 | AI740082 | BQ279320 |
| CB827719 | CB826881 | BM094397 | CA953049 | AI740082 | BQ279794 |
| CB827719 | CB828834 | BM094462 | BG316158 | AI740082 | BU080458 |
| CB827727 | CB826881 | BM094462 | BM892192 | AI740150 | AI834722 |
| CB827751 | CB826881 | BM094462 | CA953216 | AI740154 | AI745782 |
| CB827751 | CB828834 | BM094501 | AW201789 | AI740154 | AI746077 |
| CB827754 | CB826881 | BM094639 | BM143190 | AI745758 | BE575223 |
| CB827755 | BP066123 | BM094767 | CB063702 | AI745827 | AI665095 |
| CB827755 | CB826955 | BM094906 | AW781828 | AI745827 | AI714535 |
| CB827755 | CB827609 | BM094943 | BM085145 | AI745827 | AI740059 |
| CB827770 | CB828834 | BM095023 | BG882142 | AI745827 | AI833557 |
| CB827773 | CB826881 | BM095065 | CA953467 | AI745871 | BU037107 |
| CB827773 | CB828834 | BM143023 | AI441060 | AI745939 | AI664984 |
| CB827783 | BI420828 | BM143023 | AW761071 | AI745939 | AI664985 |
| CB827785 | CB827282 | BM143023 | BG790280 | AI745939 | AI668526 |
| CB827797 | CB829422 | BM143023 | BG790913 | AI745939 | AI677324 |
| CB827801 | CB826881 | BM143023 | BI425463 | AI745939 | AI712292 |
| CB827801 | CB828834 | BM143023 | BI973156 | AI745939 | AI746137 |

|          |          |          |          |          |          |
|----------|----------|----------|----------|----------|----------|
| CB827811 | CB829422 | BM143072 | BM892192 | AI745942 | AI737079 |
| CB827813 | CB826881 | BM143080 | AI440757 | AI745956 | BE511084 |
| CB827813 | CB828834 | BM143080 | AW279163 | AI745996 | AI668221 |
| CB827816 | CB826881 | BM143080 | AW397034 | AI746037 | AI665200 |
| CB827816 | CB828834 | BM143080 | BG790212 | AI746037 | AI670553 |
| CB827835 | BP075082 | BM143080 | BM143200 | AI746037 | AI677068 |
| CB827869 | CB826881 | BM143095 | BM893367 | AI746064 | AI668221 |
| CB827873 | CB826881 | BM143106 | CA953216 | AI746082 | AI665316 |
| CB827873 | CB828834 | BM143106 | CA953339 | AI746182 | AI657480 |
| CB827888 | BW595472 | BM143114 | AI496396 | AI746182 | AI665153 |
| CB827901 | CB829422 | BM143114 | AI736604 | AI746182 | AI665316 |
| CB827909 | CB826881 | BM143171 | AI495703 | AI746182 | AI665452 |
| CB827917 | CB826881 | BM143183 | BG157047 | AI746182 | AI665514 |
| CB827917 | CB828834 | BM143220 | BG316158 | AI746182 | AI677068 |
| CB827920 | CB828834 | BM143220 | BM892192 | AI746182 | AI739849 |
| CB827965 | CB826881 | BM143220 | CA953216 | AI746182 | AI739859 |
| CB827965 | CB828834 | BM731451 | AW318222 | AI746182 | AI745797 |
| CB827972 | CB826881 | BM731497 | AW185919 | AI746182 | AI759029 |
| CB827978 | CB828376 | BM731518 | CA938813 | AI746182 | AI759069 |
| CB827978 | CB829422 | BM731547 | BG790963 | AI746182 | AI759073 |
| CB828009 | CB826881 | BM731577 | AW781828 | AI746200 | AI668221 |
| CB828009 | CB828834 | BM731584 | AW596823 | AI746216 | AI668434 |
| CB828012 | CB829422 | BM731644 | BM953752 | AI746263 | BE345574 |
| CB828019 | CB828834 | BM731645 | AI460872 | AI746263 | BE553097 |
| CB828019 | CB829422 | BM731819 | CB063812 | AI759020 | AI673933 |
| CB828028 | CB828834 | BM731871 | BF425037 | AI759020 | AI740163 |
| CB828028 | CB829422 | BM731881 | BF325153 | AI759065 | AI665046 |
| CB828035 | CB826881 | BM731883 | BI471651 | AI759065 | AI740059 |
| CB828046 | BI418356 | BM731915 | AW756933 | AI759066 | BU037107 |
| CB828048 | CB829422 | BM731969 | BI787589 | AI759069 | AI665237 |
| CB828071 | CB828687 | BM732760 | BF068840 | AI759069 | AI668137 |
| CB828073 | CB828834 | BM732784 | BE473543 | AI759069 | AI677099 |
| CB828074 | CB826881 | BM732825 | AW756933 | AI759069 | AI677324 |
| CB828074 | CB828834 | BM732832 | AW100869 | AI759127 | AI737079 |
| CB828074 | CB829422 | BM732832 | AW307493 | AI770333 | AI881845 |
| CB828076 | CB828834 | BM732843 | AW756933 | AI770335 | BQ134376 |
| CB828080 | CB828834 | BM732864 | BF071219 | AI770394 | BE345574 |
| CB828080 | CB829422 | BM732973 | CB063562 | AI770394 | BE553097 |
| CB828102 | CB826881 | BM884907 | AW308934 | AI770414 | AI833399 |
| CB828105 | CB827605 | BM884972 | BG882625 | AI770416 | AI770701 |
| CB828111 | CB826881 | BM884972 | BI786492 | AI770436 | BQ034092 |
| CB828111 | CB828834 | BM885027 | BG316158 | AI770436 | BQ034581 |
| CB828122 | CB826881 | BM885027 | BM892192 | AI770436 | BQ034710 |
| CB828122 | CB828834 | BM885027 | CA953216 | AI770436 | BQ048055 |
| CB828127 | CB826881 | BM885051 | AI736944 | AI770436 | BQ048082 |
| CB828127 | CB828834 | BM885051 | AW433012 | AI770436 | BQ048134 |
| CB828130 | CB826881 | BM885051 | BE609479 | AI770436 | BQ048235 |
| CB828130 | CB828834 | BM885051 | BU090097 | AI770436 | BQ279418 |
| CB828131 | CB826881 | BM885071 | AI443440 | AI770436 | BU092746 |
| CB828131 | CB828834 | BM885071 | AI736944 | AI770482 | BU499738 |
| CB828133 | AW720371 | BM885071 | BE609479 | AI770671 | AI770579 |
| CB828133 | BF177788 | BM885071 | BE610451 | AI770691 | BE344755 |

|          |          |          |          |          |          |
|----------|----------|----------|----------|----------|----------|
| CB828133 | BI418204 | BM885071 | BU090097 | AI770705 | AI834722 |
| CB828133 | BI418526 | BM885085 | BI974262 | AI770726 | BE553097 |
| CB828133 | BI418531 | BM885085 | CA953347 | AI770788 | BE510370 |
| CB828133 | BI418902 | BM885183 | CA953049 | AI770940 | BE345574 |
| CB828133 | BI419146 | BM885195 | BF070406 | AI770940 | BE553097 |
| CB828133 | BI419390 | BM885215 | BE190271 | AI795283 | AI668221 |
| CB828133 | BW594555 | BM885225 | AW756933 | AI795351 | AI820187 |
| CB828133 | BW594738 | BM885236 | BI316340 | AI795370 | AI795280 |
| CB828133 | BW594935 | BM885357 | AW185837 | AI795426 | AI795289 |
| CB828133 | BW594937 | BM885357 | AW277568 | AI795426 | AI820333 |
| CB828133 | BW595146 | BM885357 | AW278285 | AI795435 | AI665237 |
| CB828133 | BW595335 | BM885357 | AW349666 | AI795435 | AI667806 |
| CB828133 | BW595507 | BM885357 | AW395661 | AI795435 | AI668137 |
| CB828133 | BW595661 | BM885357 | AW569009 | AI795435 | AI677099 |
| CB828133 | BW595799 | BM885357 | AW569623 | AI795435 | AI711786 |
| CB828133 | BW595817 | BM885357 | AW704435 | AI795435 | AI740029 |
| CB828133 | BW595951 | BM885357 | AW704443 | AI795435 | AI795289 |
| CB828133 | BW596061 | BM885357 | BE440604 | AI795435 | AI795510 |
| CB828133 | BW596882 | BM885357 | BE473331 | AI795435 | AI820333 |
| CB828133 | BW597119 | BM885357 | BI316463 | AI795454 | AI668326 |
| CB828133 | BW597973 | BM885357 | BI785456 | AI795511 | BU645222 |
| CB828133 | BW598155 | BM885357 | BI787474 | AI812140 | BE509969 |
| CB828133 | BW598230 | BM885357 | BI973967 | AI812165 | AI668221 |
| CB828133 | BW599080 | BM885357 | BM885709 | AI812200 | AI711919 |
| CB828133 | CB827967 | BM885357 | CA803070 | AI812200 | AI745782 |
| CB828133 | CN825051 | BM885456 | AI442897 | AI812200 | AI746111 |
| CB828133 | CN825052 | BM885456 | BE347046 | AI812210 | BU499813 |
| CB828133 | CN825387 | BM885527 | CA953347 | AI812212 | BU499589 |
| CB828133 | CN825558 | BM885613 | CA953347 | AI812244 | AI665237 |
| CB828135 | CB826881 | BM885646 | BE330907 | AI812244 | AI668137 |
| CB828135 | CB828834 | BM885736 | BM732780 | AI820160 | AI657480 |
| CB828136 | BI418639 | BM885760 | AW348358 | AI820160 | AI665200 |
| CB828136 | BI419940 | BM885788 | BM954876 | AI820160 | AI739849 |
| CB828137 | CB826881 | BM885801 | AW100141 | AI820160 | AI759073 |
| CB828137 | CB829422 | BM885801 | AW759325 | AI820160 | AW07649  |
| CB828138 | CB829422 | BM885829 | AI960887 | AI820165 | AI740163 |
| CB828149 | CB826881 | BM885829 | AW308980 | AI820165 | AI745782 |
| CB828152 | CB828834 | BM885829 | AW459931 | AI820165 | AI746077 |
| CB828153 | CB826881 | BM885829 | BG881563 | AI820165 | AI746111 |
| CB828153 | CB828834 | BM885864 | AW756933 | AI820166 | AI740059 |
| CB828166 | CB826881 | BM885937 | AW756933 | AI820166 | AI833557 |
| CB828166 | CB829422 | BM885937 | CA953347 | AI820172 | BU098084 |
| CB828173 | CB828169 | BM885993 | BM093266 | AI820177 | BU499813 |
| CB828174 | CB827652 | BM886153 | CA937933 | AI820240 | BE509969 |
| CB828174 | CB827687 | BM890635 | CA938177 | AI820285 | AI668221 |
| CB828175 | BI420452 | BM890664 | AW760925 | AI820299 | BU499510 |
| CB828175 | BI420697 | BM890665 | BM731844 | AI820311 | AI668221 |
| CB828175 | CB827861 | BM890737 | AW308980 | AI820337 | AI668221 |
| CB828175 | CB828602 | BM890737 | AW459931 | AI820340 | AI665046 |
| CB828175 | CB828958 | BM890829 | BG157563 | AI820340 | AI737043 |
| CB828175 | CB829229 | BM891881 | CA953347 | AI820340 | AI833557 |
| CB828175 | CB829375 | BM891897 | AI736604 | AI820354 | BE511109 |



|          |          |          |          |          |          |
|----------|----------|----------|----------|----------|----------|
| CB828177 | CB826881 | BM891920 | AW756933 | AI820363 | BE575063 |
| CB828177 | CB828834 | BM891954 | BI974262 | AI820426 | BE510164 |
| CB828192 | CB826881 | BM891990 | AW132573 | AI833432 | AI673933 |
| CB828192 | CB828834 | BM891990 | AW782206 | AI833438 | BE511084 |
| CB828207 | CB826881 | BM891994 | AW279471 | AI833466 | AI665200 |
| CB828207 | CB828834 | BM891994 | BI973200 | AI833466 | AI665452 |
| CB828212 | CB826881 | BM891995 | BM892192 | AI833466 | AI665514 |
| CB828212 | CB829422 | BM892005 | AW396105 | AI833466 | AI665579 |
| CB828213 | CB828834 | BM892104 | AW756933 | AI833466 | AI712167 |
| CB828213 | CB829422 | BM892104 | BI974262 | AI833466 | AI739849 |
| CB828247 | AW720557 | BM892120 | AW397395 | AI833466 | AI759069 |
| CB828247 | BI417317 | BM892197 | BF595081 | AI833466 | AI759073 |
| CB828247 | BI417446 | BM892211 | AI737009 | AI833506 | AI668221 |
| CB828247 | BI417770 | BM892256 | AW200814 | AI833540 | AI665046 |
| CB828247 | BP058809 | BM892337 | AI494797 | AI833540 | AI833557 |
| CB828247 | BP064538 | BM892340 | AI443733 | AI833544 | AI711919 |
| CB828247 | BP064684 | BM892350 | AI735949 | AI833549 | AI665153 |
| CB828247 | BP065058 | BM892365 | BE473703 | AI833549 | AI665316 |
| CB828247 | BP065180 | BM892378 | AW756933 | AI833549 | AI665452 |
| CB828247 | BP065621 | BM892378 | CA953347 | AI833549 | AI745797 |
| CB828247 | BP066165 | BM892557 | BG882363 | AI833549 | AI759029 |
| CB828247 | BP066974 | BM892558 | AI900009 | AI833549 | AI759069 |
| CB828247 | CB826861 | BM892745 | BG154403 | AI833672 | AI833399 |
| CB828247 | CB827038 | BM892750 | AI441281 | AI833755 | AI668221 |
| CB828247 | CB827388 | BM892798 | BI944400 | AI833897 | AI668221 |
| CB828247 | CB827404 | BM892811 | AW099985 | AI833920 | AI657480 |
| CB828247 | CB827649 | BM892811 | AW620739 | AI833920 | AI665153 |
| CB828247 | CB828078 | BM892811 | CA802295 | AI833920 | AI665452 |
| CB828247 | CB828198 | BM892819 | BG789482 | AI833920 | AI665579 |
| CB828247 | CB828681 | BM892838 | BI974262 | AI833920 | AI667869 |
| CB828247 | CB829227 | BM892913 | CA953489 | AI833920 | AI668186 |
| CB828247 | CB829499 | BM892926 | CA953347 | AI833920 | AI668326 |
| CB828254 | CB829296 | BM893030 | AI438056 | AI833920 | AI670629 |
| CB828272 | CB826881 | BM893034 | AW756933 | AI833920 | AI677266 |
| CB828272 | CB828834 | BM893034 | CA953347 | AI833920 | AI737723 |
| CB828274 | CB828376 | BM893169 | AI494908 | AI833920 | AI739849 |
| CB828277 | CB829422 | BM893187 | CA953347 | AI833920 | AI739859 |
| CB828290 | CB826881 | BM893188 | BM892192 | AI833920 | AI740104 |
| CB828290 | CB828834 | BM893237 | CA953347 | AI833920 | AI759069 |
| CB828299 | CB826881 | BM893258 | BG316158 | AI833920 | AI812128 |
| CB828299 | CB828834 | BM893258 | BM892192 | AI833920 | AI820282 |
| CB828299 | CB829422 | BM893258 | CA953216 | AI833920 | AW07649  |
| CB828300 | AW720557 | BM893284 | BI321177 | AI834110 | AI834722 |
| CB828300 | BI419164 | BM893306 | AW099698 | AI834483 | AI746223 |
| CB828300 | BI419752 | BM893306 | AW760120 | AI834524 | AW16549  |
| CB828300 | BP062762 | BM893306 | BF010248 | AI834524 | AW17200  |
| CB828300 | BP063555 | BM893306 | BF068747 | AI834536 | AI834557 |
| CB828300 | BP064312 | BM893306 | BF070483 | AI834545 | BQ279612 |
| CB828300 | BP064538 | BM893306 | BF071687 | AI834599 | AI714863 |
| CB828300 | BP064830 | BM893306 | BF424375 | AI834618 | AI834152 |
| CB828300 | BP064937 | BM893306 | BG881619 | AI834641 | AI692035 |
| CB828300 | BP065058 | BM893306 | BM893138 | AI834685 | AI664880 |

|          |          |          |          |          |          |
|----------|----------|----------|----------|----------|----------|
| CB828300 | BP065161 | BM893330 | AW760360 | AI834685 | AI665176 |
| CB828300 | BP065397 | BM893381 | BG316158 | AI834685 | AI665891 |
| CB828300 | BP065827 | BM893381 | BM892192 | AI834685 | AI666210 |
| CB828300 | BP066496 | BM893381 | CA953216 | AI834685 | AI670209 |
| CB828300 | BP066974 | BM893410 | BI787520 | AI834685 | AI691807 |
| CB828300 | BP067372 | BM893420 | BE330907 | AI834685 | AI691974 |
| CB828300 | BP068270 | BM893423 | AI900057 | AI834685 | AI715004 |
| CB828300 | CB826861 | BM893423 | AW472242 | AI834685 | AI734438 |
| CB828300 | CB827546 | BM893423 | BM893246 | AI834685 | AI734641 |
| CB828300 | CB828198 | BM893432 | AW756933 | AI834685 | AI739791 |
| CB828300 | CB828257 | BM893465 | BM892192 | AI834685 | AI739797 |
| CB828302 | CB828834 | BM893499 | AI736604 | AI834685 | AI834157 |
| CB828324 | CB828376 | BM893500 | AI900190 | AI834685 | AW50693  |
| CB828324 | CB829422 | BM953730 | AW756933 | AI834685 | AW51991  |
| CB828328 | AI967727 | BM953761 | BI974262 | AI834685 | BE553027 |
| CB828328 | BP060152 | BM953804 | AI900170 | AI834685 | BM41670  |
| CB828328 | BP068368 | BM953804 | BM892571 | AI834685 | BQ172523 |
| CB828328 | BP069498 | BM953845 | CA953347 | AI834685 | BQ293539 |
| CB828332 | CB826881 | BM953888 | BF596179 | AI834685 | BQ635531 |
| CB828332 | CB828834 | BM953908 | CA953049 | AI834685 | BU093203 |
| CB828340 | CB826881 | BM953945 | AW277739 | AI834685 | BU102362 |
| CB828340 | CB828834 | BM953952 | AW756933 | AI854910 | BE345916 |
| CB828346 | AW719791 | BM953963 | BG882363 | AI854914 | AI795320 |
| CB828346 | AW720618 | BM953988 | BG316158 | AI854915 | AW17202  |
| CB828346 | BI418165 | BM953988 | BM892192 | AI854923 | AI668326 |
| CB828346 | BI418319 | BM953988 | CA953216 | AI854936 | AW17202  |
| CB828346 | BI420181 | BM954020 | CA953347 | AI854946 | BQ294126 |
| CB828346 | BI420391 | BM954054 | BF071687 | AI854946 | BQ487111 |
| CB828346 | BW599938 | BM954086 | AW279166 | AI854963 | AI691438 |
| CB828346 | CB827501 | BM954119 | AW132573 | AI855056 | AI666013 |
| CB828353 | CB828376 | BM954119 | AW782206 | AI881255 | AI834722 |
| CB828353 | CB829422 | BM954147 | BF594977 | AI881265 | AI881845 |
| CB828357 | CB826881 | BM954250 | BG316158 | AI881326 | AI881845 |
| CB828357 | CB828834 | BM954250 | BM892192 | AI881398 | AW05706  |
| CB828407 | CB826881 | BM954250 | CA953216 | AI881434 | AW05588  |
| CB828407 | CB828834 | BM954290 | AW760771 | AI881485 | BQ279612 |
| CB828409 | CB829422 | BM954301 | AI736604 | AI881627 | AI881845 |
| CB828415 | CB826881 | BM954798 | BI785117 | AI881633 | AI770360 |
| CB828417 | CB827687 | BM954906 | BE609384 | AI881633 | AI770807 |
| CB828422 | CB826881 | BM954906 | BI320434 | AI881633 | AI881437 |
| CB828422 | CB828834 | BM954965 | BF010080 | AI881633 | AI881813 |
| CB828432 | AW719702 | BM954996 | AW756933 | AI881633 | AI881880 |
| CB828432 | BI417241 | BM955005 | BF070153 | AI881633 | BE345600 |
| CB828432 | BI417374 | BM955053 | BU091022 | AI881636 | AI834722 |
| CB828432 | BI417465 | BM955092 | AI735949 | AI881640 | AI670592 |
| CB828432 | BI417916 | BU089783 | AI736604 | AI881640 | AI941725 |
| CB828432 | BI418134 | BU090238 | AI736604 | AI881640 | BQ779507 |
| CB828432 | BI418323 | BU090256 | BU090814 | AI881640 | BU037978 |
| CB828432 | BI419191 | BU090371 | CA953216 | AI881640 | BU499548 |
| CB828432 | BI419765 | BU090371 | CA953339 | AI881645 | AI941535 |
| CB828432 | BI419921 | BU090504 | BG316158 | AI881647 | AW05706  |
| CB828432 | BI420662 | BU090504 | BM892192 | AI881685 | BQ547810 |

|          |          |          |          |          |          |
|----------|----------|----------|----------|----------|----------|
| CB828432 | BW596357 | BU090504 | CA953216 | AI881685 | BQ778707 |
| CB828432 | BW596738 | BU090504 | CA953339 | AI881685 | BU093636 |
| CB828432 | BW621372 | BU090505 | AW781828 | AI881748 | BU099009 |
| CB828432 | BW621862 | BU090536 | AI748264 | AI881863 | AI881845 |
| CB828432 | BW621924 | BU090536 | AI856830 | AI881876 | AI770579 |
| CB828432 | BW622054 | BU090536 | AW277498 | AI901388 | BQ539600 |
| CB828432 | BW622629 | BU090536 | BG882824 | AI901413 | BE454014 |
| CB828432 | BW622806 | BU090536 | BI973884 | AI901481 | BE345490 |
| CB828432 | BW622885 | BU090536 | BU091019 | AI901481 | BE575291 |
| CB828432 | BW622915 | BU090707 | AW132573 | AI901481 | BQ294090 |
| CB828432 | BW622932 | BU090707 | AW782206 | AI901481 | BQ486631 |
| CB828432 | BW623227 | BU090843 | BG316158 | AI901481 | BU037952 |
| CB828432 | BW623276 | BU090884 | BG316158 | AI901481 | BU079820 |
| CB828432 | BW623352 | BU090936 | AI856758 | AI901487 | AW45317  |
| CB828432 | BW623502 | BU090936 | AW782058 | AI901500 | AI737205 |
| CB828432 | BW623579 | BU090936 | BE190208 | AI901515 | AI691662 |
| CB828432 | BW623839 | BU090936 | BG157749 | AI901515 | AI714965 |
| CB828432 | BW623876 | BU090947 | BM085145 | AI901515 | AI834733 |
| CB828432 | BW623965 | BU090954 | AI966249 | AI901515 | BQ486711 |
| CB828432 | BW623982 | BU090978 | BM893263 | AI901593 | AI855043 |
| CB828432 | BW624049 | BU091014 | BM892192 | AI901593 | BQ294055 |
| CB828432 | BW624122 | BU091070 | CA953216 | AI901593 | BU101442 |
| CB828432 | BW624337 | BU091070 | CA953339 | AI901680 | AW31343  |
| CB828432 | BW624976 | BU091080 | BM892192 | AI901680 | AW49746  |
| CB828432 | BW625044 | BU091080 | CA953216 | AI901680 | BQ280203 |
| CB828432 | BW625067 | CA782128 | CA819488 | AI901777 | BU093197 |
| CB828432 | BW625234 | CA782167 | AI736952 | AI901804 | CA452893 |
| CB828432 | BW625617 | CA782196 | AW756933 | AI901804 | CA452894 |
| CB828432 | BW625821 | CA782196 | CA953347 | AI901844 | BU499519 |
| CB828432 | BW626252 | CA782198 | AI735945 | AI901885 | AI734597 |
| CB828432 | BW626398 | CA782198 | AW318141 | AI901980 | BU197944 |
| CB828432 | BW626522 | CA802045 | BE347617 | AI902037 | AI833690 |
| CB828432 | BW626628 | CA802152 | BF425968 | AI920532 | CA452894 |
| CB828432 | BW626792 | CA802259 | BE440484 | AI920568 | BU093197 |
| CB828432 | BW626850 | CA802269 | AW101542 | AI920605 | AI668503 |
| CB828432 | BW627027 | CA802269 | BF425968 | AI920605 | AI691525 |
| CB828432 | BW627125 | CA802302 | BI974262 | AI920605 | AI734746 |
| CB828432 | BW627361 | CA802390 | BF425968 | AI920605 | AI740062 |
| CB828432 | BW627412 | CA802411 | AI443264 | AI920605 | AI820190 |
| CB828432 | BW627441 | CA802468 | AI856420 | AI920605 | AW05625  |
| CB828432 | BW627531 | CA802468 | AW570368 | AI920605 | BE186150 |
| CB828432 | BW627771 | CA802468 | BE610450 | AI920605 | BE186451 |
| CB828432 | BW627962 | CA802468 | BE804557 | AI920605 | BE519074 |
| CB828432 | BW628095 | CA802468 | BF426095 | AI920605 | BE644410 |
| CB828432 | BW628139 | CA802468 | BG154911 | AI920605 | BQ280247 |
| CB828432 | BW628255 | CA802468 | BG155152 | AI920605 | BQ621205 |
| CB828432 | BW628288 | CA802468 | BG155456 | AI920605 | BU582103 |
| CB828432 | BW628532 | CA802468 | BG156931 | AI932131 | AW17188  |
| CB828432 | BW628603 | CA802468 | BG237075 | AI932131 | AW49837  |
| CB828432 | BW628693 | CA802468 | CA802377 | AI932137 | BU499813 |
| CB828432 | BW629216 | CA802468 | CA937697 | AI932144 | BQ293526 |
| CB828432 | BW629610 | CA802652 | BF325153 | AI932176 | BU582368 |

|          |          |          |          |          |          |
|----------|----------|----------|----------|----------|----------|
| CB828432 | BW629807 | CA802665 | BI974262 | AI939746 | AI939773 |
| CB828432 | BW630057 | CA802810 | AI443264 | AI939804 | BE475910 |
| CB828432 | BW630108 | CA802812 | BF424197 | AI941525 | AI657463 |
| CB828432 | BW630230 | CA802813 | AI856288 | AI941525 | BE129718 |
| CB828432 | BW630287 | CA802813 | AI959949 | AI941525 | BQ164284 |
| CB828432 | BW630322 | CA802813 | AI960073 | AI941525 | BQ486995 |
| CB828432 | BW630370 | CA802813 | AW570368 | AI941525 | BU092719 |
| CB828432 | BW630481 | CA802813 | BE610450 | AI941525 | BU098249 |
| CB828432 | BW630696 | CA802813 | BG156603 | AI941525 | BU498820 |
| CB828432 | BW630914 | CA802813 | BG157011 | AI941620 | BE510425 |
| CB828432 | BW631021 | CA802813 | BI941949 | AI941738 | AI942123 |
| CB828432 | BW631111 | CA802813 | CA802377 | AI941822 | BQ635842 |
| CB828432 | BW631113 | CA802821 | BF425968 | AI941914 | AI677253 |
| CB828432 | BW631308 | CA802841 | BG316158 | AI941914 | AI691695 |
| CB828432 | BW631373 | CA802841 | BM892192 | AI941914 | BQ280216 |
| CB828432 | BW631533 | CA802841 | CA953216 | AI942130 | AI673985 |
| CB828432 | BW631556 | CA802913 | AW310920 | AI942132 | BE511084 |
| CB828432 | BW631752 | CA802939 | AI856288 | AI943647 | CA452894 |
| CB828432 | BW631867 | CA802939 | AI960073 | AI943676 | AI665609 |
| CB828432 | BW632338 | CA802939 | AW570368 | AI943676 | AI820192 |
| CB828432 | BW632355 | CA802939 | BE610450 | AI943676 | AW17186  |
| CB828432 | BW632441 | CA802939 | BG156603 | AI943676 | BE453736 |
| CB828432 | BW632599 | CA802939 | BG157011 | AI943676 | BE453879 |
| CB828432 | BW632832 | CA802939 | BI941949 | AI943676 | BE475693 |
| CB828432 | BW632922 | CA802939 | CA802377 | AI943676 | BE476011 |
| CB828432 | BW632946 | CA818879 | BF425968 | AI943676 | BE510238 |
| CB828432 | BW632979 | CA819077 | BF425968 | AI943676 | BE552574 |
| CB828432 | BW633004 | CA819077 | CA819515 | AI943676 | BM41675  |
| CB828432 | BW633040 | CA819084 | BM892639 | AI943676 | BQ034794 |
| CB828432 | BW633064 | CA819145 | AW397445 | AI943676 | BQ034982 |
| CB828432 | BW633180 | CA819169 | BF425968 | AI943676 | BQ134295 |
| CB828432 | CB826767 | CA819223 | AW756933 | AI943676 | BQ134557 |
| CB828450 | CB829296 | CA819295 | BF425968 | AI943676 | BQ172528 |
| CB828454 | CB826881 | CA819298 | CA819794 | AI943676 | BQ172529 |
| CB828454 | CB828834 | CA819320 | BF425968 | AI943676 | BQ293917 |
| CB828465 | CB828834 | CA819326 | BE347298 | AI987217 | AW31322  |
| CB828472 | CB826881 | CA819345 | BF425968 | AI987238 | AI670592 |
| CB828472 | CB828834 | CA819383 | BE804557 | AI987238 | AI670611 |
| CB828473 | CB826881 | CA819383 | BG154911 | AI987238 | AI820266 |
| CB828474 | CB826881 | CA819383 | CA937697 | AI987238 | BQ779507 |
| CB828478 | BP059197 | CA819564 | AI495452 | AI987238 | BU037978 |
| CB828484 | CB828834 | CA819594 | BF425968 | AI987238 | BU499548 |
| CB828493 | CB826881 | CA819595 | BF425968 | AI987238 | BU499549 |
| CB828493 | CB828834 | CA819648 | BI943681 | AI987384 | BU079430 |
| CB828495 | BI419428 | CA819738 | BE804557 | AW05420  | AW42481  |
| CB828495 | BI419733 | CA819738 | BG154911 | AW05428  | AI737627 |
| CB828496 | CB828834 | CA819738 | CA937697 | AW05428  | AI740171 |
| CB828540 | BP067607 | CA819760 | BF425968 | AW05428  | AW35267  |
| CB828543 | BI417948 | CA819777 | BF425968 | AW05428  | BE640060 |
| CB828543 | BI418326 | CA819777 | BU091074 | AW05446  | AI942086 |
| CB828543 | BI419047 | CA819812 | BG316158 | AW05446  | BE238708 |
| CB828543 | BW628235 | CA819812 | BM892192 | AW05446  | BE345111 |

|          |          |          |          |         |          |
|----------|----------|----------|----------|---------|----------|
| CB828548 | CB826881 | CA819812 | CA953216 | AW05454 | AW49744  |
| CB828548 | CB828834 | CA819829 | AI856420 | AW05454 | AW52016  |
| CB828554 | CB826881 | CA819829 | BF426095 | AW05454 | AW56649  |
| CB828557 | CB826881 | CA819829 | CA937697 | AW05460 | BE510425 |
| CB828557 | CB828834 | CA934991 | AI735945 | AW05461 | AI740007 |
| CB828565 | CB828834 | CA935028 | BF425968 | AW05560 | AW50684  |
| CB828569 | CB826881 | CA935071 | CA938200 | AW05560 | AW56301  |
| CB828579 | BP071320 | CA935083 | BF425968 | AW05567 | AW42481  |
| CB828591 | CB826881 | CA935099 | AW101727 | AW05568 | BU093453 |
| CB828642 | CB826881 | CA935099 | BF425968 | AW05588 | AW06179  |
| CB828657 | CB829422 | CA935123 | BF425968 | AW05589 | AI670592 |
| CB828664 | CB827687 | CA935137 | AI736604 | AW05589 | AI670611 |
| CB828664 | CB828169 | CA935151 | AW101542 | AW05589 | AI820266 |
| CB828680 | CB826881 | CA935161 | AW781859 | AW05589 | AI941725 |
| CB828688 | CB826881 | CA935173 | BF425968 | AW05589 | BQ779507 |
| CB828728 | CB827652 | CA935203 | BF425968 | AW05589 | BU037978 |
| CB828756 | CB826881 | CA935216 | AI856288 | AW05589 | BU499548 |
| CB828756 | CB828834 | CA935216 | AI856420 | AW05589 | BU499549 |
| CB828758 | BW600245 | CA935216 | AI959949 | AW05589 | CA408745 |
| CB828760 | CB826881 | CA935216 | AI960073 | AW05590 | BQ833915 |
| CB828771 | CB827687 | CA935216 | AW570368 | AW05590 | BU197808 |
| CB828771 | CB828169 | CA935216 | BE610450 | AW05610 | AW45313  |
| CB828800 | BW598482 | CA935216 | BF426095 | AW05618 | BQ547750 |
| CB828817 | CB828834 | CA935216 | BG156603 | AW05618 | BU079441 |
| CB828840 | CB826881 | CA935216 | BG157011 | AW05710 | AW49744  |
| CB828840 | CB829422 | CA935216 | BI941949 | AW06165 | AI740007 |
| CB828871 | CB826881 | CA935216 | CA802377 | AW06178 | AW52021  |
| CB828880 | BW594987 | CA935216 | CA937697 | AW06648 | BE345574 |
| CB828891 | CB827652 | CA935234 | AW309010 | AW06648 | BE553097 |
| CB828896 | CB826881 | CA935254 | BF425968 | AW06650 | AI795501 |
| CB828918 | CB826881 | CA935266 | AI973662 | AW06750 | AW49744  |
| CB828918 | CB829422 | CA935267 | AW099234 | AW06750 | AW52016  |
| CB828929 | CB826881 | CA935267 | AW132405 | AW06750 | AW56649  |
| CB828929 | CB828834 | CA935267 | AW132849 | AW06750 | AI666205 |
| CB828935 | CB826881 | CA935267 | AW472393 | AW06750 | AI691307 |
| CB828948 | CB826881 | CA935267 | BE609249 | AW06750 | AI714725 |
| CB828948 | CB829422 | CA935435 | AW101542 | AW06750 | AI734428 |
| CB828956 | CB828834 | CA935475 | AW350742 | AW06750 | AI738123 |
| CB828956 | CB829422 | CA935483 | BG155056 | AW06750 | AI738243 |
| CB828970 | CB826881 | CA935530 | AI856288 | AW06750 | AI770776 |
| CB828970 | CB828834 | CA935530 | AI856420 | AW06750 | AI881861 |
| CB828978 | CB826881 | CA935530 | AI959949 | AW06750 | AI881973 |
| CB828978 | CB829422 | CA935530 | AI960073 | AW06750 | BE510595 |
| CB828979 | BW598602 | CA935530 | AW570368 | AW06750 | BE510623 |
| CB828982 | CB828834 | CA935530 | BE610450 | AW06750 | BE552836 |
| CB828987 | CB826881 | CA935530 | BG156603 | AW06750 | BE575079 |
| CB828987 | CB828834 | CA935530 | BG157011 | AW06750 | BQ295624 |
| CB828990 | CB826881 | CA935530 | CA802377 | AW06750 | BQ295658 |
| CB828990 | CB828834 | CA935530 | CA937697 | AW06750 | BQ401173 |
| CB829004 | CB829422 | CA935620 | CA819488 | AW06750 | BQ401206 |
| CB829016 | CB826881 | CA937677 | AI441288 | AW06750 | BQ621080 |
| CB829016 | CB828834 | CA937677 | AI495726 | AW06750 | BQ621152 |

|          |          |          |          |         |          |
|----------|----------|----------|----------|---------|----------|
| CB829025 | CB826881 | CA937677 | AI507848 | AW06750 | BU099024 |
| CB829025 | CB828834 | CA937677 | AI930633 | AW06753 | BQ279924 |
| CB829026 | CB828834 | CA937677 | AW102100 | AW07649 | AI833752 |
| CB829030 | CB829422 | CA937677 | AW132347 | AW07649 | BU499813 |
| CB829035 | CB828834 | CA937677 | AW472476 | AW16548 | AI833619 |
| CB829037 | CB826881 | CA937677 | AW757123 | AW16548 | BU080378 |
| CB829037 | CB828834 | CA937677 | BE475529 | AW16556 | AI665707 |
| CB829038 | CB826881 | CA937677 | BG352294 | AW16556 | AI745930 |
| CB829038 | CB828834 | CA937677 | BI424333 | AW16556 | AW36063  |
| CB829038 | CB829422 | CA937677 | BI973816 | AW16556 | AW50693  |
| CB829042 | CB829422 | CA937677 | BM094338 | AW16556 | AW60037  |
| CB829062 | CB829422 | CA937677 | BM732857 | AW16556 | BE344921 |
| CB829064 | CB826881 | CA937677 | BM892476 | AW16556 | BQ164247 |
| CB829070 | BI419940 | CA937677 | BM893287 | AW16556 | BU102404 |
| CB829083 | CB826881 | CA937677 | BM953703 | AW16556 | BU571936 |
| CB829111 | CB826881 | CA937677 | BM953857 | AW16559 | CA452894 |
| CB829111 | CB828834 | CA937677 | BM953983 | AW16562 | BU197477 |
| CB829113 | CB826881 | CA937677 | BM954858 | AW16562 | BU499738 |
| CB829113 | CB828834 | CA937677 | CA937694 | AW16564 | AI668385 |
| CB829123 | CB827687 | CA937677 | CA937878 | AW16564 | AI739942 |
| CB829123 | CB828169 | CA937677 | CA938148 | AW16564 | AW26759  |
| CB829145 | BW596979 | CA937677 | CA939063 | AW16564 | BE512176 |
| CB829146 | CB826881 | CA937677 | CA953484 | AW16564 | BE639720 |
| CB829154 | CB826881 | CA937716 | AW756933 | AW16564 | BQ667840 |
| CB829154 | CB828834 | CA937768 | BM954956 | AW16564 | BQ779399 |
| CB829167 | CB826881 | CA937840 | AI736604 | AW17183 | AI920549 |
| CB829167 | CB828834 | CA937906 | AI988180 | AW17185 | BE345156 |
| CB829177 | CB826881 | CA937906 | BI944400 | AW17208 | BU197477 |
| CB829177 | CB828834 | CA937928 | BM893493 | AW17208 | BU499738 |
| CB829180 | CB826881 | CA937976 | CA953347 | AW17211 | BU197944 |
| CB829180 | CB828834 | CA938107 | AI736604 | AW17935 | AI737348 |
| CB829181 | CB826881 | CA938107 | AI901200 | AW17936 | AI939812 |
| CB829193 | CB826881 | CA938130 | AI735949 | AW17938 | BU197944 |
| CB829193 | CB828834 | CA938156 | BM893493 | AW17942 | AI670658 |
| CB829204 | CB826881 | CA938226 | AI736972 | AW17942 | AW36063  |
| CB829204 | CB828834 | CA938236 | AW277739 | AW17942 | AW50693  |
| CB829219 | CB828834 | CA938255 | BG882363 | AW17942 | BE344921 |
| CB829239 | CB829422 | CA938830 | CB063831 | AW17942 | BE509913 |
| CB829256 | CB826881 | CA938842 | AW756933 | AW17942 | BQ172471 |
| CB829257 | CB826881 | CA938893 | AW756933 | AW17942 | BU102404 |
| CB829257 | CB828834 | CA938914 | BI974262 | AW17942 | BU571640 |
| CB829262 | CB826881 | CA938917 | AW756933 | AW26720 | BU499738 |
| CB829262 | CB829422 | CA938917 | BI974262 | AW26721 | BE553045 |
| CB829286 | CB826881 | CA938950 | AI736604 | AW26723 | BU079884 |
| CB829302 | CB826881 | CA938962 | AI988604 | AW28221 | AI834057 |
| CB829311 | CB828834 | CA938990 | AW832262 | AW28221 | BU098038 |
| CB829311 | CB829422 | CA938997 | AI443660 | AW28222 | CA452893 |
| CB829315 | CB826881 | CA939031 | AI443733 | AW28851 | AI738396 |
| CB829315 | CB828834 | CA939031 | AI494797 | AW28851 | BU080362 |
| CB829330 | CB826881 | CA939031 | AI495703 | AW28852 | BU197944 |
| CB829330 | CB828834 | CA939062 | BE473548 | AW28861 | BE186125 |
| CB829337 | CB826881 | CA939062 | BE609270 | AW28861 | BE186883 |

|          |          |          |          |         |          |
|----------|----------|----------|----------|---------|----------|
| CB829337 | CB828834 | CA939082 | AI440998 | AW28862 | CA452893 |
| CB829346 | BI418639 | CA939082 | AI441053 | AW28862 | CA452894 |
| CB829355 | CB826881 | CA939082 | AI442821 | AW28868 | AW26728  |
| CB829355 | CB828834 | CA939082 | AI442887 | AW28894 | AW49744  |
| CB829357 | AW719791 | CA939082 | AI443756 | AW30872 | AW26729  |
| CB829357 | AW720618 | CA939082 | AI460853 | AW30872 | BQ635452 |
| CB829357 | BI418165 | CA939082 | AI960078 | AW31325 | AW05444  |
| CB829357 | BI418319 | CA939082 | AW351163 | AW31328 | AI734748 |
| CB829357 | BI420181 | CA939082 | AW780552 | AW31328 | BQ034533 |
| CB829357 | BI420391 | CA939082 | BE609441 | AW31328 | BQ034539 |
| CB829357 | BW599938 | CA939103 | BE473703 | AW31328 | BQ034553 |
| CB829357 | CB827501 | CA952910 | CA953216 | AW31328 | BQ034648 |
| CB829432 | CB826881 | CA952910 | CA953339 | AW31328 | BQ047987 |
| CB829432 | CB828834 | CA952936 | BI424428 | AW31328 | BQ048004 |
| CB829443 | CB826881 | CA952998 | BM892192 | AW31328 | BQ048007 |
| CB829450 | CB826881 | CA953029 | BM885271 | AW31328 | BU098852 |
| CB829456 | CB826881 | CA953066 | AW132573 | AW31339 | AI668503 |
| CB829456 | CB828834 | CA953066 | AW782206 | AW31339 | AI691525 |
| CB829458 | BP071320 | CA953100 | AI737009 | AW31339 | AI740062 |
| CB829474 | CB826881 | CA953103 | AI460872 | AW31339 | BE186775 |
| CB829474 | CB828834 | CA953113 | AI960844 | AW31339 | BE519074 |
| CB829489 | CB827687 | CA953144 | BI787428 | AW31339 | BQ280247 |
| CB829489 | CB828169 | CA953169 | BF424927 | AW31339 | BQ293375 |
| CB829514 | CB826881 | CA953171 | BF594977 | AW35256 | AI770564 |
| CB829514 | CB828834 | CA953185 | BF070153 | AW35256 | BQ527974 |
| CB829516 | CB826881 | CA953185 | BF594977 | AW35256 | BU080071 |
| CB829517 | BP066123 | CA953194 | AI736604 | AW35256 | BU498904 |
| CB829517 | CB826955 | CA953227 | BG157047 | AW36057 | AI734726 |
| CB829517 | CB827609 | CA953239 | BM095020 | AW36057 | AI941605 |
| CB829531 | CB826881 | CA953243 | AW277739 | AW36057 | AW05602  |
| CB829542 | CB826881 | CA953260 | CB063637 | AW36057 | BU197902 |
| CB829542 | CB829422 | CA953300 | AI901099 | AW36070 | AI664955 |
| CB829570 | CB828834 | CA953301 | AW756933 | AW36070 | AI665600 |
| CB829573 | CB828834 | CA953408 | AW734784 | AW36070 | AI691541 |
| CB829577 | CB826881 | CA953421 | AW756933 | AW36070 | AI692080 |
| CB829577 | CB828834 | CA953421 | BI974262 | AW36070 | AI714635 |
| CB829588 | CB826881 | CA953464 | AI900009 | AW36070 | AI734324 |
| CB829588 | CB828834 | CA953520 | BF068747 | AW36070 | AI833765 |
| CB829594 | CB826881 | CA953520 | BF070483 | AW36070 | AI834046 |
| CB829594 | CB828834 | CA953520 | BF071687 | AW36070 | AI941664 |
| CB829595 | CB826881 | CA953520 | BG881619 | AW36070 | AW57353  |
| CB829600 | CB826881 | CB063433 | AW756933 | AW36070 | BQ635425 |
| CB829601 | CB826881 | CB063544 | BM892192 | AW36070 | BQ635635 |
| CB829605 | CB826881 | CB063545 | BG882363 | AW42479 | BE344960 |
| CB829605 | CB828834 | CB063577 | BF071687 | AW42861 | AI665060 |
| CB829626 | CB828834 | CB063586 | CA953347 | AW42861 | AI677605 |
| CB829627 | CB826881 | CB063648 | CB063637 | AW42861 | AI812204 |
| CB829627 | CB828834 | CB063681 | CB063817 | AW42861 | AI820168 |
| CB829650 | CB829422 | CB063697 | BF595367 | AW42861 | AI833370 |
| CB829658 | CB826881 | CB063697 | BG157450 | AW42861 | AI833853 |
| CB829658 | CB828834 | CB063697 | CA952978 | AW42861 | AI854936 |
| CB829661 | BW626925 | CB063708 | AW100167 | AW42861 | AI932156 |

|                 |          |                |            |         |          |
|-----------------|----------|----------------|------------|---------|----------|
| CB829667        | CB829422 | CB063732       | BM885271   | AW42861 | AW17202  |
| CB829673        | CB827485 | CB063758       | BE330814   | AW42861 | AW26758  |
| CB829690        | CB827687 | CB063760       | AI496396   | AW42861 | AW28856  |
| CB829690        | CB828169 | CB063760       | AI736604   | AW42861 | BE186873 |
| CN824945        | CN825004 | CB063785       | AI496396   | AW42861 | BE510164 |
| CN824963        | BP066011 | CB063785       | AI736604   | AW42861 | BE512069 |
| CN825128        | BW596388 | CB063794       | AW756933   | AW42861 | BE512070 |
| CN825128        | BW597072 | CB063799       | AI960999   | AW42861 | BE639492 |
| CN825273        | BE122598 | CB063845       | BG156316   | AW42861 | BE640278 |
| CN825273        | CB827275 | CB063847       | AW756933   | AW42861 | BQ704044 |
| CN825273        | CB827953 | CB063848       | AW277739   | AW42861 | BU037729 |
| CN825273        | CB828859 | CB063881       | CA953216   | AW42861 | BU092763 |
| CN825273        | CB829394 | CB063881       | CA953339   | AW42864 | BE553097 |
| CN825274        | BW595178 | <i>Glycine</i> | williams82 | AW45315 | AW45331  |
| CN825274        | BW597704 | EST1           | EST2       | AW45315 | BQ527998 |
| CN825447        | CN825508 | AI416734       | BF425574   | AW45315 | BU092986 |
| CN825494        | CN825508 | AI416841       | BU082665   | AW45316 | AI734726 |
| CN825500        | CN825508 | AI416846       | BM187652   | AW45316 | AI941605 |
| CN825505        | BW596388 | AI416877       | AI938774   | AW45316 | AW05602  |
| CN825505        | BW597072 | AI416877       | AW458432   | AW45316 | BU197902 |
| CN825565        | CN825004 | AI416877       | AW733572   | AW45337 | AI770564 |
| CN825581        | BW596388 | AI416877       | BE022682   | AW45337 | BQ527974 |
| CN825581        | BW597072 | AI416877       | BE023983   | AW45337 | BU080071 |
| CN825593        | BW595178 | AI416877       | BG511563   | AW45337 | BU498904 |
| CN825593        | BW597704 | AI416877       | BG511564   | AW45338 | BE553097 |
| CN825667        | BW598602 | AI416877       | BI941602   | AW49750 | BQ294055 |
| <i>Medicago</i> | a17      | AI416877       | BI941699   | AW49750 | BQ744601 |
| EST1            | EST2     | AI416877       | BQ610760   | AW49750 | BU101442 |
| AI974268        | CB893088 | AI416877       | BQ628644   | AW49755 | AW56283  |
| AI974390        | AW257388 | AI416877       | BQ629625   | AW49755 | AW60040  |
| AI974390        | AW573794 | AI416914       | BE022682   | AW49757 | AI737205 |
| AI974390        | AW574254 | AI416914       | BG508252   | AW49787 | BE510036 |
| AI974390        | AW774282 | AI416914       | BG511563   | AW49799 | AW42481  |
| AI974390        | AW774564 | AI416914       | BI941602   | AW49844 | AW57340  |
| AI974390        | AW776939 | AI416914       | BI941699   | AW49927 | BQ164224 |
| AI974390        | AW980908 | AI416914       | BQ610760   | AW49927 | BQ547810 |
| AI974390        | BE124660 | AI416914       | BQ628644   | AW49931 | AW50684  |
| AI974390        | BE202866 | AI416914       | BQ629625   | AW49931 | AW56301  |
| AI974390        | BE204050 | AI431222       | BQ785116   | AW49936 | AW49788  |
| AI974390        | BE997984 | AI748430       | AW433253   | AW49941 | AI674025 |
| AI974390        | BE998018 | AI748430       | AW459100   | AW49941 | AI691525 |
| AI974390        | BE998542 | AI748430       | BM522672   | AW49941 | AI737959 |
| AI974390        | BE999299 | AI748430       | BM954654   | AW49941 | AI740062 |
| AI974390        | BF005182 | AI748430       | BQ612788   | AW49941 | BE186150 |
| AI974390        | BF519239 | AI748445       | CX711538   | AW49941 | BE186524 |
| AI974390        | BG580649 | AI748538       | AW424375   | AW49941 | BE186775 |
| AI974390        | BG581633 | AI748538       | BG362844   | AW49941 | BE640340 |
| AI974390        | BG582017 | AI759714       | BM886952   | AW49941 | BQ280247 |
| AI974390        | BG582373 | AI759749       | CX547614   | AW49941 | BQ293375 |
| AI974390        | BG582804 | AI759754       | BQ612579   | AW49941 | BQ621205 |
| AI974390        | BG582841 | AI759826       | BE555036   | AW49941 | BU582103 |
| AI974390        | BG583556 | AI759835       | BE555036   | AW49942 | BE575223 |



|          |          |          |          |         |          |
|----------|----------|----------|----------|---------|----------|
| AI974390 | BG583621 | AI759908 | CX547614 | AW49943 | AI737079 |
| AI974390 | BG604216 | AI759908 | CX706524 | AW50682 | BU093242 |
| AI974390 | BG644591 | AI759954 | BG352137 | AW50691 | AI668259 |
| AI974390 | BG647166 | AI899884 | AW733658 | AW51994 | AW49788  |
| AI974390 | BG649112 | AI930764 | BM886171 | AW51994 | AW49808  |
| AI974390 | BI308788 | AI930830 | BG510099 | AW51998 | BU499738 |
| AI974390 | BI308880 | AI930830 | BG511280 | AW52000 | AW49744  |
| AI974390 | BI308984 | AI930842 | CX547709 | AW52000 | AW52016  |
| AI974390 | BI309440 | AI930842 | CX702573 | AW52000 | AW56649  |
| AI974390 | BI312248 | AI930945 | BQ080891 | AW52003 | BE345574 |
| AI974390 | BM780115 | AI938422 | AW119919 | AW52003 | BE553097 |
| AI974390 | CA917233 | AI938422 | BM522572 | AW52005 | BU582242 |
| AI974390 | CA917660 | AI938422 | BQ081080 | AW56261 | AI737079 |
| AI974390 | CA917669 | AI938422 | BQ629841 | AW56279 | BU499738 |
| AI974390 | CA917927 | AI938422 | CF921905 | AW56312 | AI737079 |
| AI974390 | CB066660 | AI938422 | CX548827 | AW56612 | AI692100 |
| AI974390 | CB892579 | AI938422 | CX708189 | AW56612 | AI711637 |
| AI974390 | CB893012 | AI938422 | CX709426 | AW56612 | AI714378 |
| AI974390 | CB893525 | AI938422 | CX710869 | AW56612 | AI820102 |
| AI974390 | CB893749 | AI938471 | AW396108 | AW56612 | AI833467 |
| AI974390 | CB893754 | AI938471 | BE022682 | AW56612 | AI881497 |
| AI974390 | CB894609 | AI938471 | BE023983 | AW56612 | AI941955 |
| AI974390 | CF069465 | AI938471 | BE190877 | AW56612 | AW17183  |
| AI974694 | AW560420 | AI938471 | BG508252 | AW56612 | AW56287  |
| AW127114 | BG582658 | AI938471 | BG508395 | AW56612 | BE509707 |
| AW127114 | BQ750668 | AI938471 | BG511563 | AW56612 | BE511166 |
| AW127114 | CA920261 | AI938471 | BI941699 | AW56612 | BE575116 |
| AW127124 | AW981096 | AI938471 | BM188486 | AW56612 | BU499735 |
| AW127124 | BG582691 | AI938471 | BM567940 | AW56612 | BQ172583 |
| AW127133 | BE997521 | AI938471 | BQ298597 | AW56614 | AW52021  |
| AW127139 | BE942019 | AI938471 | BQ629625 | AW56616 | AW49812  |
| AW127152 | CB894482 | AI938484 | AW119915 | AW56617 | BQ295636 |
| AW127160 | BE997932 | AI938671 | BE023834 | AW56623 | AW49744  |
| AW127174 | BM779975 | AI938726 | BQ627727 | AW56623 | AW52016  |
| AW127253 | BG582691 | AI938882 | BQ612969 | AW56623 | AW56649  |
| AW127407 | AW775588 | AI938909 | BG511227 | AW56628 | AW49788  |
| AW127407 | BG648758 | AI939096 | CF922496 | AW56628 | AW49808  |
| AW127476 | BF005190 | AI939177 | BM188196 | AW56633 | AI834722 |
| AW127476 | BF519449 | AI939188 | BI972353 | AW56642 | AW36068  |
| AW127561 | BF005190 | AI939215 | BG511227 | AW56642 | AW52016  |
| AW127561 | BF519449 | AI939270 | AW119764 | AW56644 | AW28217  |
| AW127569 | BG648985 | AI939270 | AW156789 | AW56644 | AW35267  |
| AW127604 | BF005190 | AI939270 | BE059289 | AW56647 | AW49744  |
| AW127604 | BF006601 | AI939270 | BE059586 | AW56647 | AW52016  |
| AW127604 | BF519449 | AI939270 | BM176884 | AW56647 | AW56649  |
| AW127604 | DW019226 | AI939270 | BU579342 | AW57334 | AW49744  |
| AW127606 | BF005190 | AI941469 | BE211468 | AW57334 | AW52016  |
| AW127606 | BF006601 | AI941469 | BM568057 | AW57334 | AW56649  |
| AW127606 | BF519449 | AI960217 | CO036102 | AW57334 | AW05594  |
| AW127606 | DW019226 | AI960250 | BI972353 | AW57341 | AW49744  |
| AW127630 | BF003462 | AI960332 | CX548075 | AW57341 | AW52016  |
| AW127641 | BF005190 | AI960462 | BE191154 | AW57342 | BE186125 |

|          |          |          |          |          |          |
|----------|----------|----------|----------|----------|----------|
| AW127641 | BF006601 | AI960462 | BG509622 | AW57342  | BE186883 |
| AW127641 | DW019226 | AI960462 | BM522502 | AW57347  | AI737205 |
| AW127650 | BF005190 | AI960462 | BQ740510 | AW57354  | AI692020 |
| AW127650 | BF519449 | AI960462 | BQ741259 | AW57354  | AI714952 |
| AW127657 | BG649043 | AI960543 | AW306395 | AW60037  | AW42481  |
| AW127685 | BE997711 | AI960543 | BE059305 | AW60038  | BU499738 |
| AW191277 | BG648471 | AI960543 | BE330215 | AW60043  | AI737079 |
| AW207944 | AW980681 | AI960543 | BE330463 | AW60051  | AW50684  |
| AW208123 | BE997521 | AI960543 | BE330509 | AW60053  | AI737079 |
| AW208136 | BE999252 | AI960543 | BI972068 | BE122966 | BQ833915 |
| AW208193 | AW574045 | AI960543 | BQ741889 | BE122966 | BU197808 |
| AW208193 | CF069222 | AI960543 | CX705146 | BE122972 | AI677373 |
| AW208259 | CA921719 | AI960571 | AI938485 | BE122999 | BQ172685 |
| AW208288 | CF068245 | AI960571 | AW394711 | BE122999 | BU093560 |
| AW208306 | BG581305 | AI960571 | AW458884 | BE123002 | AI668321 |
| AW208306 | BG582986 | AI960571 | BM523496 | BE123002 | AI670294 |
| AW225602 | AW560420 | AI960607 | AW733572 | BE123002 | AI737047 |
| AW225604 | DW015193 | AI960607 | BE022682 | BE123002 | AI737254 |
| AW256408 | CA921871 | AI960607 | BE023983 | BE123002 | AI833551 |
| AW256441 | CA918087 | AI960607 | BE190877 | BE123002 | AI833922 |
| AW256514 | AW208164 | AI960607 | BG508252 | BE123002 | AI881333 |
| AW256538 | BG582141 | AI960607 | BG511563 | BE123002 | AW05457  |
| AW256552 | BG582141 | AI960607 | BG511564 | BE123002 | AW36071  |
| AW256552 | BG647731 | AI960607 | BQ628644 | BE123002 | AW50668  |
| AW256583 | CB892307 | AI960607 | BQ628780 | BE123002 | AW56288  |
| AW256846 | BI309870 | AI960607 | BQ629625 | BE123002 | BE123078 |
| AW256846 | CA991092 | AI965346 | AW423722 | BE123002 | BE123355 |
| AW256855 | DW016434 | AI965351 | AI938723 | BE123002 | BE123368 |
| AW257101 | BG647923 | AI965351 | BG511401 | BE123002 | BE186885 |
| AW257236 | BQ164980 | AI965351 | BI941637 | BE123002 | BE224913 |
| AW257305 | BE204163 | AI965351 | BM176938 | BE123002 | BE344707 |
| AW257305 | BE998840 | AI965351 | BM188877 | BE123002 | BE344788 |
| AW257305 | BG583873 | AI965351 | BM891335 | BE123002 | BE510307 |
| AW257305 | BG646117 | AI965351 | BU578276 | BE123002 | BE511199 |
| AW257305 | BG647291 | AI965447 | BG362912 | BE123002 | BE512539 |
| AW257305 | BM779935 | AI965554 | AW306294 | BE123002 | BE552518 |
| AW257305 | BQ164756 | AI965554 | BQ610618 | BE123002 | BE552654 |
| AW257341 | CB891322 | AI965664 | AI960282 | BE123002 | BE575226 |
| AW257536 | DW019432 | AI965885 | BG511227 | BE123002 | BE638670 |
| AW257538 | DW019432 | AI965888 | BQ741254 | BE123002 | BE638788 |
| AW267703 | AW560420 | AI965891 | AI939205 | BE123002 | BE638893 |
| AW267746 | AW559530 | AI965891 | AI965635 | BE123002 | BE638991 |
| AW267749 | CA919030 | AI965891 | AI965644 | BE123002 | BQ034207 |
| AW268019 | AW127366 | AI965891 | AI966660 | BE123002 | BQ034349 |
| AW268019 | AW127378 | AI965891 | AW100519 | BE123002 | BQ034603 |
| AW268019 | AW127479 | AI965891 | AW423641 | BE123002 | BQ034715 |
| AW268019 | AW127483 | AI965891 | AW432317 | BE123002 | BQ048099 |
| AW268019 | AW775338 | AI965891 | AW459860 | BE123002 | BQ134199 |
| AW268019 | AW775433 | AI965891 | AW733651 | BE123002 | BQ134298 |
| AW268019 | AW775645 | AI965891 | AW734046 | BE123002 | BQ134313 |
| AW268019 | AW775730 | AI965891 | BE058567 | BE123002 | BQ134487 |
| AW268019 | AW775753 | AI965891 | BE059270 | BE123002 | BQ164275 |

|          |          |          |          |          |          |
|----------|----------|----------|----------|----------|----------|
| AW268019 | AW775883 | AI965891 | BE059425 | BE123002 | BQ164287 |
| AW268019 | AW775960 | AI965891 | BE191410 | BE123002 | BQ172605 |
| AW268019 | AW775987 | AI965891 | BE191492 | BE123002 | BQ172678 |
| AW268019 | AW776026 | AI965891 | BE191578 | BE123002 | BQ280233 |
| AW268019 | AW776133 | AI965891 | BF071354 | BE123002 | BQ294449 |
| AW268019 | AW776281 | AI965891 | BF324391 | BE123002 | BQ295724 |
| AW268019 | AW776319 | AI965891 | BF425009 | BE123002 | BQ486604 |
| AW268019 | AW776353 | AI965891 | BG352825 | BE123002 | BQ547795 |
| AW268019 | AW776376 | AI965891 | BG551069 | BE123002 | BQ620873 |
| AW268019 | AW776436 | AI965891 | BI893145 | BE123002 | BQ620984 |
| AW268019 | AW776442 | AI965891 | BI893184 | BE123002 | BQ635460 |
| AW268019 | AW776529 | AI965891 | BI893394 | BE123002 | BQ667865 |
| AW268019 | AW776587 | AI965891 | BI893420 | BE123002 | BQ667866 |
| AW268019 | AW776637 | AI965891 | BI893500 | BE123002 | BQ668076 |
| AW268019 | AW981181 | AI965891 | BI893544 | BE123002 | BQ778808 |
| AW268019 | AW981303 | AI965891 | BI893965 | BE123002 | BQ779463 |
| AW268019 | BE123919 | AI965891 | BI941621 | BE123002 | BQ833742 |
| AW268019 | BE123992 | AI965891 | BI974624 | BE123002 | BU036614 |
| AW268019 | BE124028 | AI965891 | BI974771 | BE123002 | BU036651 |
| AW268019 | BE124275 | AI965891 | BI974807 | BE123002 | BU037253 |
| AW268019 | BF004925 | AI965891 | BM091713 | BE123002 | BU037456 |
| AW268019 | BF004931 | AI965891 | BM092033 | BE123002 | BU037597 |
| AW268019 | BF004951 | AI965891 | BM092368 | BE123002 | BU037921 |
| AW268019 | BF005027 | AI965891 | BM092369 | BE123002 | BU093152 |
| AW268019 | BF005056 | AI965891 | BM093814 | BE123002 | BU093238 |
| AW268019 | BF005134 | AI965891 | BM270977 | BE123002 | BU093334 |
| AW268019 | BF005143 | AI965891 | BM886217 | BE123002 | BU093533 |
| AW268019 | BF005196 | AI965891 | BM886312 | BE123002 | BU093607 |
| AW268019 | BF005202 | AI965891 | BM886438 | BE123002 | BU097838 |
| AW268019 | BF005208 | AI965891 | BM886812 | BE123002 | BU097918 |
| AW268019 | BF005265 | AI965891 | BM886880 | BE123002 | BU098379 |
| AW268019 | BF005334 | AI965891 | BM887271 | BE123002 | BU102347 |
| AW268019 | BF005364 | AI965891 | BM887354 | BE123002 | BU197875 |
| AW268019 | BF005445 | AI965891 | BM887498 | BE123002 | BU500081 |
| AW268019 | BF005503 | AI965891 | BM891047 | BE123002 | BU572168 |
| AW268019 | BF005605 | AI965891 | BM891207 | BE123002 | BU582030 |
| AW268019 | BF005742 | AI965891 | BM891258 | BE123002 | BU582317 |
| AW268019 | BF005760 | AI965891 | BM891266 | BE123002 | BU645158 |
| AW268019 | BF005822 | AI965891 | BM891315 | BE123002 | BU645245 |
| AW268019 | BF005824 | AI965891 | BM891328 | BE123002 | CA408407 |
| AW268019 | BF005826 | AI965891 | BM891347 | BE123002 | CA452956 |
| AW268019 | BF005906 | AI965891 | BM891596 | BE123003 | BE511084 |
| AW268019 | BF005950 | AI965891 | BM891824 | BE123005 | AI666013 |
| AW268019 | BF005952 | AI965891 | BQ079690 | BE123039 | AI714721 |
| AW268019 | BF005973 | AI965891 | BQ630527 | BE123039 | AI714726 |
| AW268019 | BF006020 | AI965891 | BQ740438 | BE123039 | AI734465 |
| AW268019 | BF006047 | AI965891 | BQ741651 | BE123039 | AI739810 |
| AW268019 | BF006052 | AI965891 | BQ742384 | BE123039 | AI739815 |
| AW268019 | BF006077 | AI965891 | BQ742448 | BE123039 | AI770426 |
| AW268019 | BF006129 | AI965891 | BQ785589 | BE123039 | AI812171 |
| AW268019 | BF006167 | AI965891 | BU577641 | BE123039 | AI834590 |
| AW268019 | BF006226 | AI966537 | AI938647 | BE123039 | AI881534 |

|          |          |          |          |          |          |
|----------|----------|----------|----------|----------|----------|
| AW268019 | BF006316 | AI966562 | AW423843 | BE123039 | BQ279509 |
| AW268019 | BF006365 | AI966712 | BQ740335 | BE123039 | BQ279554 |
| AW268019 | BF006378 | AW099249 | BM887288 | BE123039 | BQ280055 |
| AW268019 | BF006440 | AW099312 | BG511227 | BE123039 | BQ280056 |
| AW268019 | BF006465 | AW099334 | AW156835 | BE123039 | BQ293570 |
| AW268019 | BF006485 | AW099334 | CX702336 | BE123039 | BQ293620 |
| AW268019 | BF006544 | AW099345 | CX702937 | BE123039 | BQ527938 |
| AW268019 | BF006555 | AW099367 | BM886171 | BE123039 | BU093212 |
| AW268019 | BF006558 | AW100553 | AW119915 | BE123039 | BU102425 |
| AW268019 | BF006630 | AW119413 | AW433253 | BE123039 | CA408949 |
| AW268019 | BF006745 | AW119413 | BM522672 | BE123085 | BU098038 |
| AW268019 | BF006747 | AW119712 | AW733572 | BE123085 | BU197808 |
| AW268019 | BF518517 | AW119712 | BE023983 | BE123118 | BQ172685 |
| AW268019 | BF518559 | AW119712 | BE190877 | BE123120 | AI668321 |
| AW268019 | BF518639 | AW119712 | BG508252 | BE123120 | AI670294 |
| AW268019 | BF518665 | AW119712 | BG511563 | BE123120 | AI737047 |
| AW268019 | BF518728 | AW119712 | BI941602 | BE123120 | AI737254 |
| AW268019 | BF518862 | AW119712 | BI941699 | BE123120 | AI745956 |
| AW268019 | BF518918 | AW119712 | BM188486 | BE123120 | AI833431 |
| AW268019 | BF518946 | AW119712 | BQ610760 | BE123120 | AI833438 |
| AW268019 | BF518987 | AW119712 | BQ628644 | BE123120 | AI833551 |
| AW268019 | BF519051 | AW119712 | BQ629625 | BE123120 | AI833922 |
| AW268019 | BF519101 | AW119790 | BE191383 | BE123120 | AI881333 |
| AW268019 | BF519126 | AW119790 | BE191511 | BE123120 | AI941561 |
| AW268019 | BF519186 | AW152896 | AW432569 | BE123120 | AW05457  |
| AW268019 | BF519294 | AW152896 | BG550884 | BE123120 | AW06216  |
| AW268019 | BF519471 | AW152896 | BM177199 | BE123120 | AW36056  |
| AW268019 | BF519477 | AW152896 | BM177201 | BE123120 | AW36071  |
| AW268019 | BF519485 | AW152896 | BM187627 | BE123120 | AW50668  |
| AW268019 | BF519529 | AW152896 | BQ740456 | BE123120 | AW51995  |
| AW268019 | BF519590 | AW152896 | BQ740499 | BE123120 | AW56288  |
| AW268019 | BF519636 | AW152896 | BQ742495 | BE123120 | BE123078 |
| AW268019 | BF519640 | AW152896 | BQ785234 | BE123120 | BE123355 |
| AW268019 | BF519678 | AW152896 | BQ785436 | BE123120 | BE123368 |
| AW268019 | BF519695 | AW152896 | BQ785674 | BE123120 | BE123450 |
| AW268019 | BF519713 | AW152896 | BQ786243 | BE123120 | BE186491 |
| AW268019 | BF519735 | AW152896 | BQ786315 | BE123120 | BE186800 |
| AW268019 | BF519789 | AW152896 | BQ786662 | BE123120 | BE186885 |
| AW268019 | BF519818 | AW152896 | BU577039 | BE123120 | BE224913 |
| AW268019 | BF519853 | AW152896 | BU762186 | BE123120 | BE344788 |
| AW268019 | BF519860 | AW152896 | BU762350 | BE123120 | BE510307 |
| AW268019 | BF519868 | AW152896 | CX711839 | BE123120 | BE511982 |
| AW268019 | BF519882 | AW152925 | AW156460 | BE123120 | BE511983 |
| AW268019 | BF519884 | AW152925 | BG550884 | BE123120 | BE512539 |
| AW268019 | BF519888 | AW152925 | BI423809 | BE123120 | BE552518 |
| AW268019 | BF519894 | AW152925 | BM177199 | BE123120 | BE552654 |
| AW268019 | BF519929 | AW152925 | BM187627 | BE123120 | BE575226 |
| AW268019 | BF519944 | AW152925 | BM188328 | BE123120 | BE638670 |
| AW268019 | BF520002 | AW152925 | BQ079522 | BE123120 | BE638788 |
| AW268019 | BF520098 | AW152925 | BQ740499 | BE123120 | BE638893 |
| AW268019 | BF520129 | AW152925 | BQ742339 | BE123120 | BE638991 |
| AW268019 | BF520137 | AW152925 | BQ742495 | BE123120 | BQ034207 |

|          |          |          |          |          |          |
|----------|----------|----------|----------|----------|----------|
| AW268019 | BF520142 | AW152925 | BQ742656 | BE123120 | BQ034349 |
| AW268019 | BF520158 | AW152925 | BQ742960 | BE123120 | BQ034603 |
| AW268019 | BF520161 | AW152925 | BQ743098 | BE123120 | BQ048099 |
| AW268019 | BF520231 | AW152925 | BQ785612 | BE123120 | BQ134199 |
| AW268019 | BF520300 | AW152925 | BQ785672 | BE123120 | BQ134298 |
| AW268019 | BF520318 | AW152925 | BQ785674 | BE123120 | BQ134313 |
| AW268019 | BF520346 | AW152925 | BU577677 | BE123120 | BQ134487 |
| AW268019 | BF520359 | AW152925 | BU578728 | BE123120 | BQ134524 |
| AW268019 | BF520370 | AW152925 | BU762186 | BE123120 | BQ164275 |
| AW268019 | BF520409 | AW152925 | BU762350 | BE123120 | BQ164287 |
| AW268019 | BF520421 | AW152925 | CX711839 | BE123120 | BQ172605 |
| AW268019 | BF520433 | AW153040 | CF922575 | BE123120 | BQ172678 |
| AW268019 | BF520446 | AW153111 | BQ080968 | BE123120 | BQ280233 |
| AW268019 | BF520460 | AW156217 | CX705162 | BE123120 | BQ294449 |
| AW268019 | BF520467 | AW156217 | CX710426 | BE123120 | BQ295724 |
| AW268019 | BF520484 | AW156270 | BQ740566 | BE123120 | BQ401148 |
| AW268019 | BF520537 | AW156370 | BQ611759 | BE123120 | BQ486604 |
| AW268019 | BF520560 | AW156405 | BQ080106 | BE123120 | BQ547795 |
| AW268019 | BF520567 | AW156438 | CX547958 | BE123120 | BQ620873 |
| AW268019 | BF520627 | AW156438 | CX703700 | BE123120 | BQ620984 |
| AW268019 | BF520683 | AW156438 | CX710019 | BE123120 | BQ635460 |
| AW268019 | BF520686 | AW156443 | BM188223 | BE123120 | BQ635675 |
| AW268019 | BF520724 | AW156443 | BM522869 | BE123120 | BQ667865 |
| AW268019 | BF520735 | AW156465 | BQ629725 | BE123120 | BQ667866 |
| AW268019 | BF520764 | AW156676 | BQ741738 | BE123120 | BQ668076 |
| AW268019 | BF520826 | AW156709 | BI975038 | BE123120 | BQ704120 |
| AW268019 | BF520866 | AW156769 | BE022718 | BE123120 | BQ778808 |
| AW268019 | BF520923 | AW156801 | AW423722 | BE123120 | BQ779463 |
| AW268019 | BF521066 | AW156839 | CX703815 | BE123120 | BQ833742 |
| AW268019 | BF521161 | AW156843 | BQ785707 | BE123120 | BU036614 |
| AW268019 | BF521333 | AW164205 | CX701062 | BE123120 | BU036651 |
| AW268019 | BF521401 | AW164205 | CX704514 | BE123120 | BU037253 |
| AW268019 | BI309449 | AW164205 | CX704785 | BE123120 | BU037456 |
| AW268019 | BI309810 | AW164210 | BI945349 | BE123120 | BU037597 |
| AW268019 | BI310896 | AW306165 | BE191134 | BE123120 | BU037921 |
| AW268019 | BI310901 | AW306165 | BU762276 | BE123120 | BU079455 |
| AW268019 | BI311560 | AW306165 | BU765967 | BE123120 | BU079681 |
| AW268019 | CA917077 | AW306188 | AW459422 | BE123120 | BU092650 |
| AW268019 | CF068139 | AW306188 | AW705716 | BE123120 | BU093152 |
| AW268019 | CF068585 | AW306188 | BG511526 | BE123120 | BU093334 |
| AW268038 | BG647923 | AW306262 | BG511227 | BE123120 | BU093533 |
| AW299023 | CA923131 | AW306276 | BG508985 | BE123120 | BU093607 |
| AW299027 | CB892616 | AW306276 | BG509065 | BE123120 | BU097838 |
| AW299054 | BM779775 | AW306401 | AW733876 | BE123120 | BU097918 |
| AW299056 | BI311529 | AW306564 | BQ627764 | BE123120 | BU098699 |
| AW299175 | BG645491 | AW306568 | BE211468 | BE123120 | BU102347 |
| AW559226 | AI974676 | AW306633 | AW423843 | BE123120 | BU102428 |
| AW559226 | BE202759 | AW306663 | BQ785382 | BE123120 | BU197637 |
| AW559226 | BE239777 | AW306663 | BU578671 | BE123120 | BU197875 |
| AW559226 | BG589019 | AW306663 | BU765091 | BE123120 | BU500081 |
| AW559244 | BG644861 | AW311060 | BG511227 | BE123120 | BU572145 |
| AW559275 | AW775857 | AW311101 | CX707172 | BE123120 | BU572168 |

|          |          |          |          |          |          |
|----------|----------|----------|----------|----------|----------|
| AW559296 | CA922074 | AW311101 | CX711369 | BE123120 | BU582030 |
| AW559453 | BE203341 | AW311166 | BM177314 | BE123120 | BU582317 |
| AW559453 | CB894681 | AW311259 | AI938774 | BE123120 | BU645158 |
| AW559536 | BG581691 | AW311259 | AW396108 | BE123120 | BU645245 |
| AW559639 | CB892634 | AW311259 | AW458432 | BE123120 | CA408407 |
| AW559661 | AW775443 | AW311259 | AW733572 | BE123120 | CA452956 |
| AW559661 | BE124707 | AW311259 | BE023983 | BE123121 | BE511084 |
| AW559661 | BE205486 | AW311259 | BE190877 | BE123123 | AI666013 |
| AW559661 | BE239937 | AW311259 | BG508252 | BE123154 | AI714721 |
| AW559661 | BE997506 | AW311259 | BG508395 | BE123154 | AI734465 |
| AW559661 | BG648488 | AW311259 | BG511563 | BE123154 | AI739810 |
| AW559708 | BE124363 | AW311259 | BG511564 | BE123154 | AI739815 |
| AW559708 | BG581691 | AW311259 | BI941602 | BE123154 | AI770426 |
| AW559786 | CA922394 | AW311259 | BI941699 | BE123154 | AI812171 |
| AW560019 | BE124553 | AW311259 | BM188486 | BE123154 | AI834590 |
| AW560019 | BF004727 | AW311259 | BM567940 | BE123154 | BQ280055 |
| AW560019 | BG581178 | AW311259 | BQ298597 | BE123154 | BQ280056 |
| AW560019 | BG582515 | AW311259 | BQ610578 | BE123154 | BU093212 |
| AW560019 | BG588568 | AW311259 | BQ628644 | BE123157 | BE123034 |
| AW560019 | CB893489 | AW311259 | BQ629625 | BE123157 | BE123413 |
| AW560019 | CB893620 | AW311285 | BQ611271 | BE123157 | BE519023 |
| AW560020 | BE999785 | AW311287 | CX702281 | BE123157 | BQ668213 |
| AW560161 | BM780144 | AW317140 | BE191134 | BE123393 | BU093560 |
| AW560195 | AI974676 | AW317140 | BU762276 | BE123394 | AI670294 |
| AW560195 | AW774715 | AW317140 | BU765967 | BE123394 | AI812132 |
| AW560195 | BE240115 | AW317227 | AI965476 | BE123394 | AI833551 |
| AW560195 | BE240646 | AW317341 | BE329764 | BE123394 | AW05457  |
| AW560195 | BF004836 | AW317380 | BQ080792 | BE123394 | AW06216  |
| AW560195 | BQ165175 | AW317380 | CX547799 | BE123394 | AW36071  |
| AW560212 | BG580602 | AW317380 | CX702728 | BE123394 | AW49937  |
| AW560255 | AW560681 | AW317387 | CX704687 | BE123394 | AW50668  |
| AW560336 | AW267866 | AW317387 | CX711518 | BE123394 | AW56288  |
| AW560348 | BE941813 | AW317401 | CX702031 | BE123394 | BE123078 |
| AW560348 | BG648489 | AW317401 | CX706317 | BE123394 | BE123355 |
| AW560348 | DW016624 | AW394294 | BG650372 | BE123394 | BE123431 |
| AW560358 | CA991065 | AW394565 | BQ630408 | BE123394 | BE186491 |
| AW560391 | AW560413 | AW394653 | BQ080954 | BE123394 | BE186800 |
| AW560391 | CA921114 | AW394661 | BG511227 | BE123394 | BE224913 |
| AW560407 | BG644861 | AW394743 | AW733175 | BE123394 | BE344788 |
| AW560523 | BF520426 | AW394781 | BQ628342 | BE123394 | BE510307 |
| AW560524 | CA923087 | AW394781 | CX705391 | BE123394 | BE511199 |
| AW560552 | AW736304 | AW394786 | BI317813 | BE123394 | BE552654 |
| AW560708 | BF003550 | AW394786 | BI426093 | BE123394 | BE575226 |
| AW560802 | AW560420 | AW394839 | BE191348 | BE123394 | BE638788 |
| AW560822 | BE998758 | AW394871 | BM523184 | BE123394 | BE638893 |
| AW560822 | BF004727 | AW394875 | CX701998 | BE123394 | BE638991 |
| AW560822 | BG581521 | AW394875 | CX706270 | BE123394 | BQ034207 |
| AW560822 | BG588085 | AW394887 | AI938894 | BE123394 | BQ034349 |
| AW560822 | BG646549 | AW394935 | BM523184 | BE123394 | BQ034669 |
| AW560822 | BQ255408 | AW394965 | BQ786706 | BE123394 | BQ034715 |
| AW560822 | BQ255418 | AW395102 | BG511227 | BE123394 | BQ134199 |
| AW560822 | CA919885 | AW395129 | CX702150 | BE123394 | BQ134298 |

|          |          |          |          |          |          |
|----------|----------|----------|----------|----------|----------|
| AW560822 | CB893222 | AW395185 | AW423843 | BE123394 | BQ134313 |
| AW560822 | CB893397 | AW395224 | AI939184 | BE123394 | BQ164275 |
| AW560822 | CB893415 | AW395239 | AW423571 | BE123394 | BQ164287 |
| AW560822 | CB894350 | AW395247 | BQ627664 | BE123394 | BQ172605 |
| AW560822 | CB894458 | AW395298 | AW153089 | BE123394 | BQ172678 |
| AW560886 | BG648408 | AW395348 | BG727021 | BE123394 | BQ280233 |
| AW560985 | BI310751 | AW395419 | BM269611 | BE123394 | BQ294449 |
| AW560997 | BE204930 | AW395913 | BQ080968 | BE123394 | BQ295724 |
| AW561005 | BG647643 | AW395922 | CX548810 | BE123394 | BQ486604 |
| AW561126 | BI311529 | AW395922 | CX712116 | BE123394 | BQ620873 |
| AW573600 | BG589039 | AW395933 | BQ080159 | BE123394 | BQ635675 |
| AW573600 | BG645182 | AW395933 | BQ080571 | BE123394 | BQ667865 |
| AW573642 | BQ164760 | AW395933 | BQ080793 | BE123394 | BQ668076 |
| AW573646 | AW574045 | AW395943 | BM269660 | BE123394 | BQ703718 |
| AW573646 | CF069222 | AW396157 | CX708500 | BE123394 | BQ704120 |
| AW573689 | AW574045 | AW396171 | AW396294 | BE123394 | BQ778808 |
| AW573693 | BG580097 | AW396171 | CX548327 | BE123394 | BQ779463 |
| AW573700 | CA919782 | AW396245 | CX707546 | BE123394 | BU036651 |
| AW573711 | BE999049 | AW396268 | CX705595 | BE123394 | BU037253 |
| AW573711 | BG583270 | AW396378 | BU082760 | BE123394 | BU037543 |
| AW573796 | AW981096 | AW396401 | CX705566 | BE123394 | BU037597 |
| AW573796 | BG582691 | AW396409 | BE022682 | BE123394 | BU079455 |
| AW573873 | AW573766 | AW396409 | BG508252 | BE123394 | BU079681 |
| AW573873 | AW980562 | AW396409 | BG511563 | BE123394 | BU092650 |
| AW573873 | BG581100 | AW396409 | BG511564 | BE123394 | BU093152 |
| AW573873 | BG581527 | AW396409 | BM188486 | BE123394 | BU093238 |
| AW573873 | BG581751 | AW396409 | BQ628644 | BE123394 | BU093533 |
| AW573873 | BG582170 | AW396409 | BQ628780 | BE123394 | BU093607 |
| AW573873 | BG582172 | AW396409 | BQ629625 | BE123394 | BU097918 |
| AW573873 | BG583535 | AW396588 | BQ610133 | BE123394 | BU098379 |
| AW573903 | AW574045 | AW396694 | BQ742863 | BE123394 | BU098699 |
| AW573903 | CF069222 | AW396811 | BM954514 | BE123394 | BU102347 |
| AW573932 | CF069580 | AW396811 | BQ629524 | BE123394 | BU102428 |
| AW573940 | BE124363 | AW423325 | CX710800 | BE123394 | BU197637 |
| AW573955 | AW774575 | AW423397 | AW394833 | BE123394 | BU197875 |
| AW573970 | AW574045 | AW423397 | BQ741789 | BE123394 | BU500081 |
| AW573970 | CF069222 | AW423397 | BU080782 | BE123394 | BU572145 |
| AW573977 | BQ255259 | AW423431 | AW733840 | BE123394 | BU572168 |
| AW573983 | BE124290 | AW423474 | BQ080968 | BE123394 | BU582030 |
| AW574009 | BG582270 | AW423540 | AW459711 | BE123394 | BU582256 |
| AW574012 | BG644861 | AW423540 | BQ785873 | BE123394 | BU645158 |
| AW574029 | BE999432 | AW423540 | CX548810 | BE123394 | BU645245 |
| AW574049 | BG647965 | AW423540 | CX712116 | BE123394 | CA408407 |
| AW574065 | CA919782 | AW423580 | BM187957 | BE123394 | CA409121 |
| AW574166 | CB891398 | AW423682 | BQ080236 | BE123434 | BU098038 |
| AW574220 | AW208238 | AW423784 | BG509065 | BE123434 | BU197808 |
| AW574286 | BG582951 | AW423813 | CX708007 | BE123451 | AI666013 |
| AW574314 | BG581972 | AW423863 | BQ740638 | BE186135 | BE186873 |
| AW574314 | CA919999 | AW423891 | BG551159 | BE186135 | BE510164 |
| AW574339 | BE124363 | AW423990 | BU082888 | BE186409 | BE575223 |
| AW574339 | BG581691 | AW424080 | BM886358 | BE186431 | BE186873 |
| AW574359 | AW980936 | AW424084 | CX704239 | BE186431 | BE510164 |

|          |          |          |          |          |          |
|----------|----------|----------|----------|----------|----------|
| AW574361 | BE124363 | AW424323 | BQ080106 | BE186484 | AI834722 |
| AW736088 | BQ255177 | AW432231 | BQ742762 | BE186606 | AI759048 |
| AW736127 | CB893793 | AW432318 | BQ612063 | BE186606 | AI833472 |
| AW736363 | BG581509 | AW432338 | AW733435 | BE186606 | AW36060  |
| AW736363 | BG644993 | AW432403 | BQ785860 | BE186606 | BE186801 |
| AW736479 | BM779778 | AW432447 | BQ629867 | BE186606 | BE344826 |
| AW773591 | BG647923 | AW432592 | BE022718 | BE186606 | BE638671 |
| AW773637 | AW774271 | AW432593 | BI321564 | BE186606 | BU037164 |
| AW773651 | BG647811 | AW432690 | AW396294 | BE186606 | BU079457 |
| AW773717 | BF004486 | AW432690 | BE329608 | BE186606 | BU499688 |
| AW773763 | DW015757 | AW432712 | BG511227 | BE186633 | AI833399 |
| AW773770 | BG644861 | AW432804 | BG511227 | BE186643 | CA452894 |
| AW773824 | BE124783 | AW432881 | AW119915 | BE186657 | AI881435 |
| AW773872 | BE204753 | AW433229 | BU082665 | BE186658 | AI739825 |
| AW773872 | BG581491 | AW433269 | BU082483 | BE186663 | AW49791  |
| AW773872 | CF069182 | AW433279 | AW459711 | BE186663 | AW49810  |
| AW773872 | CF069268 | AW433279 | BQ628370 | BE186690 | AI668287 |
| AW773880 | CB891322 | AW433303 | AW396108 | BE186690 | AW26729  |
| AW773987 | AW774827 | AW433303 | AW733572 | BE186690 | BQ172683 |
| AW773987 | AW776433 | AW433303 | BE022682 | BE186690 | BQ635452 |
| AW773987 | BE124768 | AW433303 | BE023983 | BE186921 | AI668287 |
| AW773987 | CA918338 | AW433303 | BE190877 | BE186921 | BQ172683 |
| AW774056 | AW980936 | AW433303 | BG508252 | BE186924 | BE186500 |
| AW774073 | BG646075 | AW433303 | BG508395 | BE224769 | BQ134380 |
| AW774175 | BF003214 | AW433303 | BG511563 | BE224769 | BU080427 |
| AW774227 | BI309504 | AW433303 | BG511564 | BE224788 | BU499510 |
| AW774259 | BF519516 | AW433303 | BI941699 | BE224814 | BQ294396 |
| AW774280 | AW574200 | AW433303 | BM188486 | BE224814 | BU036877 |
| AW774280 | AW775283 | AW433303 | BM567940 | BE224846 | AI670208 |
| AW774280 | BE204445 | AW433303 | BQ298597 | BE224870 | BU197610 |
| AW774280 | BG580636 | AW433303 | BQ628644 | BE224881 | BU037107 |
| AW774280 | BG646411 | AW433303 | BQ628780 | BE224914 | AI746177 |
| AW774280 | BG646530 | AW433303 | BQ629625 | BE224914 | BQ635853 |
| AW774280 | BI308176 | AW433343 | BQ298799 | BE225031 | AI670208 |
| AW774280 | BM779882 | AW457975 | BQ081087 | BE225039 | AI664911 |
| AW774280 | DW018045 | AW457980 | BE022560 | BE225039 | AI820141 |
| AW774380 | BI308340 | AW457980 | BG726728 | BE225079 | AW56283  |
| AW774384 | CB893311 | AW457980 | BM092837 | BE225094 | BE186417 |
| AW774449 | BI307997 | AW457980 | BQ611759 | BE225094 | BQ293584 |
| AW774511 | BM780240 | AW457980 | CX707225 | BE225094 | BU093453 |
| AW774573 | AI974751 | AW458062 | BQ628411 | BE225094 | BU102410 |
| AW774600 | BG647923 | AW458100 | BQ740638 | BE225284 | BE186125 |
| AW774600 | BG647965 | AW458174 | BM954615 | BE225284 | BE186883 |
| AW774601 | BE998754 | AW458291 | BQ080968 | BE238481 | BE511084 |
| AW774653 | BF004842 | AW458310 | BU578070 | BE238527 | AI667866 |
| AW774667 | BE203338 | AW458349 | CX706500 | BE238588 | AI665521 |
| AW774693 | AW573678 | AW458390 | BM188887 | BE238588 | AI746016 |
| AW774693 | BE204445 | AW458390 | BQ785584 | BE238630 | AI820187 |
| AW774693 | BF519542 | AW458420 | BF425135 | BE238678 | BE509969 |
| AW774693 | BG580636 | AW458420 | BI787857 | BE238695 | BQ547634 |
| AW774693 | BG646411 | AW458420 | BQ611271 | BE238756 | AI737079 |
| AW774693 | BG646530 | AW458456 | BI945759 | BE238781 | AI667866 |



|          |          |          |          |          |          |
|----------|----------|----------|----------|----------|----------|
| AW774693 | BG648652 | AW458479 | CF922116 | BE238790 | BQ134492 |
| AW774693 | BI308176 | AW458661 | BQ741718 | BE344612 | AI734766 |
| AW774693 | BM779882 | AW458665 | BF066840 | BE344629 | BQ048239 |
| AW774693 | CA918190 | AW458757 | BQ741738 | BE344629 | BQ134245 |
| AW774693 | CB895138 | AW458771 | AW156509 | BE344629 | BQ293994 |
| AW774775 | DW017128 | AW458771 | AW317629 | BE344629 | BU582371 |
| AW774789 | CB893569 | AW458771 | AW395385 | BE344818 | AI734794 |
| AW774889 | BG644861 | AW458771 | BE059638 | BE344850 | AI770599 |
| AW774946 | BI308509 | AW458771 | BF069182 | BE344850 | AI770766 |
| AW774946 | BQ164760 | AW458771 | BM091618 | BE344850 | BE639339 |
| AW774991 | BG645491 | AW458771 | BM092536 | BE344862 | BE509969 |
| AW775063 | BE203458 | AW458771 | BM092756 | BE344863 | BE509969 |
| AW775063 | BF003369 | AW458771 | BQ610546 | BE344914 | BE511084 |
| AW775094 | BG645690 | AW459055 | CX549057 | BE344995 | BE509969 |
| AW775185 | CA919782 | AW459055 | CX707861 | BE345017 | BE575223 |
| AW775220 | AW127224 | AW459055 | CX711500 | BE345032 | AI740007 |
| AW775220 | AW980406 | AW459176 | AI431155 | BE345032 | AI820187 |
| AW775220 | BE998543 | AW459176 | AI431213 | BE345051 | BE186873 |
| AW775220 | BE998950 | AW459176 | BQ612872 | BE345053 | AI665430 |
| AW775245 | AW980681 | AW459284 | BM091961 | BE345053 | AI795322 |
| AW775251 | AW573766 | AW459284 | BM092189 | BE345053 | AW51993  |
| AW775251 | AW980562 | AW459343 | BE330472 | BE345140 | AW06002  |
| AW775251 | BG581100 | AW459343 | BI786971 | BE345144 | BU197944 |
| AW775251 | BG581527 | AW459406 | AW306475 | BE345167 | AI670213 |
| AW775251 | BG581751 | AW459421 | BE022560 | BE345167 | AI745880 |
| AW775251 | BG582170 | AW459421 | BQ611759 | BE345167 | BE224831 |
| AW775251 | BG582172 | AW459421 | CX707225 | BE345167 | BE509824 |
| AW775251 | BG583535 | AW459592 | AW423341 | BE345167 | BE510552 |
| AW775253 | BE997521 | AW459595 | CX703609 | BE345167 | BE511094 |
| AW775256 | AW208107 | AW459619 | BQ628008 | BE345167 | BE640181 |
| AW775256 | AW208253 | AW459673 | AW733831 | BE345167 | BU499870 |
| AW775256 | AW208308 | AW459696 | BE022682 | BE345171 | BU037222 |
| AW775256 | AW573799 | AW459696 | BG511563 | BE345284 | AI670213 |
| AW775256 | AW573952 | AW459696 | BI941602 | BE345284 | AI673993 |
| AW775256 | AW573985 | AW459696 | BI941699 | BE345284 | AI711927 |
| AW775256 | AW574006 | AW459696 | BQ610760 | BE345284 | AI745880 |
| AW775256 | AW574068 | AW459696 | BQ628644 | BE345284 | BE129702 |
| AW775256 | AW574176 | AW459744 | BQ741935 | BE345284 | BE186630 |
| AW775256 | AW980501 | AW460209 | BQ740335 | BE345284 | BE224817 |
| AW775256 | AW980631 | AW509264 | BQ741496 | BE345284 | BE224831 |
| AW775256 | AW980641 | AW509295 | BE022560 | BE345284 | BE238823 |
| AW775256 | AW980753 | AW509295 | BG726728 | BE345284 | BE345182 |
| AW775256 | AW980764 | AW509295 | BM092837 | BE345284 | BE509646 |
| AW775256 | AW980827 | AW509295 | BQ611759 | BE345284 | BE509824 |
| AW775256 | AW980970 | AW509295 | CX707225 | BE345284 | BE510552 |
| AW775256 | AW981010 | AW509306 | AI965464 | BE345284 | BE511095 |
| AW775256 | AW981019 | AW705675 | BQ079584 | BE345284 | BE511467 |
| AW775256 | AW981087 | AW733187 | BE555952 | BE345284 | BE511867 |
| AW775256 | BE124370 | AW733204 | AW306351 | BE345284 | BE518719 |
| AW775256 | BE124429 | AW733204 | AW311189 | BE345284 | BE639082 |
| AW775256 | BE124501 | AW733385 | BQ080968 | BE345284 | BE640181 |
| AW775256 | BE124680 | AW733682 | BQ081830 | BE345284 | BQ164476 |

|          |          |          |          |          |          |
|----------|----------|----------|----------|----------|----------|
| AW775256 | BE124694 | AW733690 | AI965458 | BE345284 | BU499870 |
| AW775256 | BE124748 | AW733704 | BU765973 | BE345308 | AI834722 |
| AW775256 | BE124803 | AW733704 | CX702143 | BE345459 | AI737079 |
| AW775256 | BE124837 | AW733704 | CX702440 | BE345474 | AI834722 |
| AW775256 | BE124923 | AW734014 | CX708105 | BE345582 | BQ779484 |
| AW775256 | BE124929 | AW734014 | CX711193 | BE345622 | AI820356 |
| AW775256 | BE124940 | AW734049 | BE329627 | BE345647 | AI770701 |
| AW775256 | BE124941 | AW734313 | BG511227 | BE345655 | AW28886  |
| AW775256 | BE997735 | AW734322 | BU577889 | BE345680 | BE186417 |
| AW775256 | BE997828 | AW781287 | AW423722 | BE345680 | BQ293584 |
| AW775256 | BE997895 | BE022450 | BM187665 | BE345680 | BU093453 |
| AW775256 | BE998172 | BE022450 | BM886487 | BE345680 | BU102410 |
| AW775256 | BE998402 | BE022450 | BU578848 | BE345687 | BE575223 |
| AW775256 | BE999741 | BE022450 | BU766041 | BE345688 | BQ034155 |
| AW775256 | BG580048 | BE022510 | BF066840 | BE345688 | BQ034590 |
| AW775256 | BG580147 | BE022597 | AW733831 | BE345688 | BQ034698 |
| AW775256 | BG580150 | BE022598 | AI938647 | BE345688 | BQ048174 |
| AW775256 | BG580158 | BE022624 | AI965776 | BE345688 | BQ048206 |
| AW775256 | BG580348 | BE022624 | AW458143 | BE345735 | BE575223 |
| AW775256 | BG580507 | BE022624 | BE191154 | BE345819 | BE186417 |
| AW775256 | BG580639 | BE022624 | BG509622 | BE345819 | BQ293584 |
| AW775256 | BG580887 | BE022624 | BI893999 | BE345819 | BU093453 |
| AW775256 | BG580962 | BE022624 | BM092344 | BE345819 | BU102410 |
| AW775256 | BG581086 | BE022624 | BM187659 | BE453648 | AI881215 |
| AW775256 | BG581091 | BE022624 | BM886519 | BE453664 | AI740171 |
| AW775256 | BG581162 | BE022624 | BQ740510 | BE453664 | BE640060 |
| AW775256 | BG581236 | BE022624 | BQ741250 | BE453732 | CA452894 |
| AW775256 | BG581373 | BE022624 | BQ741879 | BE453780 | AI665023 |
| AW775256 | BG581388 | BE022624 | BQ742846 | BE453780 | AI795317 |
| AW775256 | BG581566 | BE022624 | BQ786628 | BE453780 | AI902009 |
| AW775256 | BG581603 | BE022624 | BU082602 | BE453780 | BQ279398 |
| AW775256 | BG581622 | BE022624 | CX703163 | BE453780 | BQ280145 |
| AW775256 | BG581678 | BE022624 | CX706208 | BE453784 | BE224917 |
| AW775256 | BG581783 | BE022862 | AW156499 | BE453799 | AI834722 |
| AW775256 | BG581830 | BE022862 | BG352336 | BE453958 | BE186417 |
| AW775256 | BG582011 | BE022862 | CX708723 | BE453958 | BQ293584 |
| AW775256 | BG582123 | BE022888 | AW423571 | BE453958 | BU093453 |
| AW775256 | BG582136 | BE022905 | BQ740335 | BE453958 | BU102410 |
| AW775256 | BG582186 | BE023061 | AW733403 | BE453977 | BU499738 |
| AW775256 | BG582251 | BE023061 | BG551183 | BE454027 | AI901765 |
| AW775256 | BG582334 | BE023061 | BU082474 | BE454031 | AI737627 |
| AW775256 | BG582413 | BE023061 | BU082936 | BE454031 | AI740171 |
| AW775256 | BG582434 | BE023156 | BI786946 | BE454031 | AW35267  |
| AW775256 | BG582478 | BE023276 | AW395247 | BE454031 | BE640060 |
| AW775256 | BG582504 | BE023276 | AW423540 | BE475717 | BQ164322 |
| AW775256 | BG582526 | BE023276 | BE057396 | BE475770 | AI746177 |
| AW775256 | BG582598 | BE023276 | BG363035 | BE475789 | BE186417 |
| AW775256 | BG582660 | BE023276 | BG726506 | BE475789 | BQ293584 |
| AW775256 | BG582704 | BE023276 | BI426317 | BE475789 | BU093453 |
| AW775256 | BG582706 | BE023276 | BM092583 | BE475789 | BU102410 |
| AW775256 | BG582758 | BE023276 | BM092688 | BE475897 | AI737627 |
| AW775256 | BG582836 | BE023276 | BM886837 | BE475897 | AI740171 |

|          |          |          |          |          |          |
|----------|----------|----------|----------|----------|----------|
| AW775256 | BG582891 | BE023276 | BQ628341 | BE475897 | AW35267  |
| AW775256 | BG582936 | BE023276 | BQ628486 | BE475898 | AI737627 |
| AW775256 | BG582956 | BE023276 | BU578411 | BE475898 | AI740171 |
| AW775256 | BG582997 | BE023276 | CX547601 | BE475898 | AW35267  |
| AW775256 | BG583032 | BE023276 | CX709900 | BE475898 | BE640060 |
| AW775256 | BG583084 | BE023305 | BE022507 | BE475921 | AI691706 |
| AW775256 | BG583086 | BE023315 | BQ742863 | BE475921 | BE510225 |
| AW775256 | BG583124 | BE023413 | CX547614 | BE475921 | BE639906 |
| AW775256 | BG583151 | BE023413 | CX706524 | BE476007 | CA452893 |
| AW775256 | BG583207 | BE023641 | BI892943 | BE476007 | CA452894 |
| AW775256 | BG583278 | BE023760 | BG352717 | BE509643 | AI987293 |
| AW775256 | BG583389 | BE023786 | BQ628599 | BE509643 | BU093744 |
| AW775256 | BG583410 | BE023978 | BQ785707 | BE509718 | AI668325 |
| AW775256 | BG583462 | BE024023 | AW705581 | BE509718 | AI691585 |
| AW775256 | BG583477 | BE024045 | BE022682 | BE509718 | AI746152 |
| AW775256 | BG583500 | BE024045 | BG511563 | BE509718 | AW05430  |
| AW775256 | BG583578 | BE024045 | BG511564 | BE509718 | AW05455  |
| AW775256 | BG583614 | BE024045 | BI941602 | BE509718 | AW06211  |
| AW775256 | CF069452 | BE024045 | BI941699 | BE509718 | BE186769 |
| AW775256 | CF069587 | BE024045 | BQ610760 | BE509718 | BE509808 |
| AW775256 | CF069887 | BE024045 | BQ628644 | BE509718 | BQ172628 |
| AW775327 | BG648015 | BE024045 | BQ628780 | BE509718 | BQ635448 |
| AW775333 | BF519230 | BE024084 | BQ740335 | BE509718 | BQ744666 |
| AW775391 | BG581691 | BE024095 | BQ741434 | BE509718 | CA409234 |
| AW775425 | AW774831 | BE057069 | AW423722 | BE509718 | CA409252 |
| AW775432 | AW981221 | BE057154 | BE191348 | BE509753 | BU102404 |
| AW775432 | CF068052 | BE057188 | BQ298697 | BE509781 | AI795501 |
| AW775509 | DW017422 | BE057205 | BG511227 | BE509944 | BU197477 |
| AW775556 | CA990023 | BE057271 | CX711745 | BE509944 | BU499738 |
| AW775557 | CB894482 | BE057341 | BU082917 | BE509946 | AI668423 |
| AW775583 | BF005611 | BE057507 | CF922322 | BE509946 | BQ048406 |
| AW775711 | AI974751 | BE057568 | BQ612063 | BE509946 | BQ744918 |
| AW775728 | BG646417 | BE057574 | AW423722 | BE509978 | BQ279701 |
| AW775758 | AW560420 | BE057578 | BQ629346 | BE510064 | AI745742 |
| AW775776 | BE942019 | BE057578 | BQ742966 | BE510286 | AI666140 |
| AW775827 | BF006437 | BE057631 | BI945349 | BE510286 | AI666239 |
| AW775846 | BG582951 | BE057631 | BI945744 | BE510286 | AI691344 |
| AW775871 | BE124733 | BE057691 | CX710749 | BE510286 | AI691390 |
| AW776004 | BI309115 | BE057742 | BM522959 | BE510286 | AI691422 |
| AW776018 | BQ164980 | BE057742 | BQ080902 | BE510286 | AI691981 |
| AW776028 | AW559767 | BE057742 | CX703444 | BE510286 | AI714490 |
| AW776028 | AW560156 | BE057760 | BG508985 | BE510286 | AI714680 |
| AW776028 | AW560735 | BE057760 | BG509065 | BE510286 | AI734632 |
| AW776028 | BE124551 | BE057917 | BU082483 | BE510286 | AI737233 |
| AW776028 | BE124866 | BE057972 | BQ080968 | BE510286 | AI737348 |
| AW776028 | BE997658 | BE057972 | BQ081830 | BE510286 | AI738273 |
| AW776028 | BG580564 | BE058040 | BI892961 | BE510286 | AI834008 |
| AW776100 | BF006486 | BE058040 | BQ079594 | BE510286 | AI855046 |
| AW776112 | BI310189 | BE058041 | AW423843 | BE510286 | AI855142 |
| AW776210 | BM780187 | BE058133 | AW733831 | BE510286 | BQ486881 |
| AW776278 | BF006486 | BE058250 | BE330206 | BE510286 | BU582292 |
| AW776282 | BI311974 | BE058388 | BQ742863 | BE510331 | BU079961 |

|          |          |          |          |          |          |
|----------|----------|----------|----------|----------|----------|
| AW776290 | DW018086 | BE058421 | AW394463 | BE510385 | AI737627 |
| AW776294 | BG588464 | BE058422 | BQ741993 | BE510385 | AI740171 |
| AW776302 | CA918087 | BE058422 | BQ742001 | BE510385 | AW35267  |
| AW776397 | BF519733 | BE058422 | CX707291 | BE510385 | BE640060 |
| AW776476 | BG647695 | BE058422 | CX707484 | BE510412 | BE510425 |
| AW776517 | BF519733 | BE058422 | CX709335 | BE510413 | BE510425 |
| AW776530 | BI308265 | BE058431 | BQ080968 | BE510419 | AW05702  |
| AW776537 | AW776843 | BE058452 | AW311277 | BE510524 | AI770701 |
| AW776635 | BG647037 | BE058462 | BQ080968 | BE510525 | AI770701 |
| AW776676 | AW256725 | BE058534 | AW317629 | BE510600 | AW49918  |
| AW776801 | DW016049 | BE058534 | AW395385 | BE510624 | BU571922 |
| AW776845 | BG648408 | BE058534 | BE023652 | BE510640 | BE638671 |
| AW928288 | BM779965 | BE058534 | BE023804 | BE510641 | BE638671 |
| AW980323 | BG648408 | BE058534 | BE059638 | BE510644 | BE575223 |
| AW980399 | DW015651 | BE058534 | BE329726 | BE510648 | AI664940 |
| AW980418 | CB892307 | BE058534 | BE329776 | BE510648 | AI712091 |
| AW980446 | BE203421 | BE058534 | BF067231 | BE510659 | AW57346  |
| AW980451 | BG583793 | BE058534 | BF069182 | BE510659 | BE511806 |
| AW980451 | DW018389 | BE058534 | BF069192 | BE510659 | BE639602 |
| AW980455 | BE999049 | BE058534 | BG352176 | BE510659 | BQ547917 |
| AW980459 | AW775255 | BE058534 | BM091618 | BE510660 | AW06164  |
| AW980527 | AW774831 | BE058534 | BM092536 | BE510660 | AW06214  |
| AW980551 | AW573766 | BE058534 | BM092756 | BE510660 | AW06217  |
| AW980551 | AW980562 | BE058534 | BM092824 | BE510660 | AW06647  |
| AW980551 | BG581100 | BE058534 | BQ079695 | BE510660 | AW57346  |
| AW980551 | BG581527 | BE058534 | BQ080968 | BE510660 | BE511806 |
| AW980551 | BG581751 | BE058534 | BQ610546 | BE510660 | BE639602 |
| AW980551 | BG582170 | BE058636 | CX705592 | BE510660 | BE639603 |
| AW980551 | BG582172 | BE058666 | BM177314 | BE510660 | BQ169280 |
| AW980551 | BG583535 | BE058839 | BQ612063 | BE510660 | BQ401226 |
| AW980577 | BG581305 | BE058987 | BE022682 | BE510660 | BQ547917 |
| AW980577 | BG582986 | BE058987 | BG511563 | BE510660 | BQ620903 |
| AW980595 | AW775939 | BE058987 | BG511564 | BE510660 | BU036654 |
| AW980595 | BE204586 | BE058987 | BI941602 | BE510660 | BU036728 |
| AW980595 | BE204859 | BE058987 | BI941699 | BE510660 | BU037370 |
| AW980603 | BE999049 | BE058987 | BQ610760 | BE510660 | BU572194 |
| AW980643 | AW574045 | BE058987 | BQ628644 | BE510660 | BU572195 |
| AW980643 | CF069222 | BE058987 | BQ628780 | BE510660 | BU582170 |
| AW980756 | BG581244 | BE058996 | CX548418 | BE510660 | CA408427 |
| AW980830 | BG644861 | BE059014 | AW119915 | BE510660 | CA483596 |
| AW980864 | BE999049 | BE059094 | BM887269 | BE510742 | BE575223 |
| AW980879 | BG582518 | BE059195 | CX548327 | BE510797 | BE510164 |
| AW980888 | AW127222 | BE059196 | AW459137 | BE510812 | BE575223 |
| AW980888 | AW208216 | BE059281 | BQ080792 | BE510857 | AI670213 |
| AW980888 | AW573632 | BE059281 | CX547799 | BE510857 | AI673993 |
| AW980888 | AW573766 | BE059281 | CX702728 | BE510857 | AI745880 |
| AW980888 | AW574033 | BE059369 | BE329784 | BE510857 | BE186630 |
| AW980888 | AW777088 | BE059532 | AW133500 | BE510857 | BE224817 |
| AW980888 | AW777097 | BE059532 | AW156509 | BE510857 | BE224831 |
| AW980888 | AW980714 | BE059532 | AW317629 | BE510857 | BE345182 |
| AW980888 | BE124698 | BE059532 | BE330510 | BE510857 | BE509646 |
| AW980888 | BE997726 | BE059532 | BF067075 | BE510857 | BE509824 |

|          |          |          |          |          |          |
|----------|----------|----------|----------|----------|----------|
| AW980888 | BE999316 | BE059532 | BM091618 | BE510857 | BE510552 |
| AW980888 | BE999689 | BE059532 | BM092189 | BE510857 | BE511095 |
| AW980888 | BG580193 | BE059532 | BM092296 | BE510857 | BE511467 |
| AW980888 | BG580230 | BE059532 | BM092756 | BE510857 | BE511867 |
| AW980888 | BG580643 | BE059532 | BQ080870 | BE510857 | BE640181 |
| AW980888 | BG581458 | BE059532 | BQ610546 | BE510857 | BQ164476 |
| AW980888 | BG581751 | BE059592 | AW781332 | BE510857 | BU499870 |
| AW980888 | BG581986 | BE059595 | BM270982 | BE510865 | AI665188 |
| AW980888 | BG582170 | BE059619 | BE191348 | BE510865 | AW57337  |
| AW980888 | BG582208 | BE059735 | BQ081176 | BE510868 | BE186790 |
| AW980888 | BG582233 | BE059735 | BQ630098 | BE510869 | BE186790 |
| AW980888 | BG583346 | BE059794 | BG511227 | BE510940 | BE186565 |
| AW980888 | BG583358 | BE190836 | BG511227 | BE510996 | BQ547810 |
| AW980888 | BG583894 | BE190881 | BG511227 | BE510996 | BQ778707 |
| AW980894 | AW981221 | BE190907 | BG511227 | BE510996 | BU093636 |
| AW980894 | CF068052 | BE191042 | BG511227 | BE510996 | BU098450 |
| AW980926 | BE999049 | BE191051 | BG511227 | BE510996 | BU499862 |
| AW980926 | BG583270 | BE191057 | BI426238 | BE510996 | CA409138 |
| AW980947 | CB892307 | BE191057 | BQ785860 | BE511103 | AW57335  |
| AW980981 | BM779990 | BE191115 | CX710296 | BE511104 | AW57335  |
| AW980981 | BM780240 | BE191117 | BG511227 | BE511143 | AI665707 |
| AW980987 | BE999252 | BE191260 | AI939184 | BE511143 | AI670658 |
| AW981055 | BG580602 | BE191356 | BE329583 | BE511143 | AI745930 |
| AW981079 | BE997521 | BE191445 | BG508466 | BE511143 | AW36063  |
| AW981090 | BG644861 | BE191445 | BM188041 | BE511143 | AW50693  |
| AW981097 | BE997521 | BE191445 | BM522816 | BE511143 | AW60037  |
| AW981100 | AW127219 | BE191481 | BG511227 | BE511143 | BE344921 |
| AW981119 | BG581329 | BE191552 | BQ627664 | BE511143 | BE509913 |
| AW981129 | BG582691 | BE191574 | BG511227 | BE511143 | BQ164247 |
| AW981133 | AW127222 | BE191587 | BQ628285 | BE511143 | BQ172471 |
| AW981133 | AW574033 | BE191596 | BU082635 | BE511143 | BQ744753 |
| AW981133 | AW777088 | BE191606 | BE330472 | BE511143 | BU102404 |
| AW981133 | AW777097 | BE191606 | BI786971 | BE511143 | BU571640 |
| AW981133 | AW980714 | BE191628 | BG511227 | BE511143 | BU571936 |
| AW981133 | BE124698 | BE211298 | BM188816 | BE511144 | AI665707 |
| AW981133 | BE997726 | BE211300 | BU080598 | BE511144 | AI670658 |
| AW981133 | BE999316 | BE211323 | BM522869 | BE511144 | AW36063  |
| AW981133 | BG580230 | BE211455 | CX705482 | BE511144 | AW50693  |
| AW981133 | BG581100 | BE211456 | BM891269 | BE511144 | BE344921 |
| AW981133 | BG581458 | BE211478 | BE555579 | BE511144 | BE509913 |
| AW981133 | BG581527 | BE211478 | BF069033 | BE511144 | BQ164247 |
| AW981133 | BG581751 | BE211478 | BG727036 | BE511144 | BU102404 |
| AW981133 | BG581986 | BE211478 | BI787811 | BE511144 | BU571640 |
| AW981133 | BG582170 | BE211478 | BI971763 | BE511148 | BE511084 |
| AW981133 | BG582208 | BE211478 | BQ081252 | BE511153 | BE509993 |
| AW981133 | BG582233 | BE211478 | BQ081270 | BE511193 | BE575223 |
| AW981133 | BG583346 | BE211478 | BQ629950 | BE511280 | BE511084 |
| AW981133 | BG583358 | BE211478 | BQ629996 | BE511472 | BE509969 |
| AW981133 | BG583535 | BE211478 | BQ630400 | BE511595 | BE575223 |
| AW981133 | BG583552 | BE211478 | BQ740857 | BE511634 | AI714503 |
| AW981133 | BG583894 | BE211478 | BQ742015 | BE511634 | AW55919  |
| AW981165 | AW776630 | BE211523 | BQ627664 | BE511634 | AW56239  |

|          |          |          |          |          |          |
|----------|----------|----------|----------|----------|----------|
| AW981169 | BG644861 | BE211530 | AI965476 | BE511634 | AW56239  |
| AW981177 | BG646578 | BE211566 | BG551105 | BE511634 | AW56239  |
| AW981217 | BF519733 | BE211693 | AI965476 | BE511673 | AI667866 |
| AW981412 | BF518628 | BE211711 | BF067378 | BE511821 | BE186125 |
| AW981448 | DW018921 | BE211743 | BE330329 | BE511821 | BE186883 |
| BE123937 | BF004164 | BE211743 | BQ081004 | BE511826 | AI712094 |
| BE123977 | AW560413 | BE211743 | BQ081017 | BE511826 | AI712159 |
| BE123977 | CA921114 | BE329496 | BG511227 | BE511826 | AI714608 |
| BE123985 | BE999437 | BE329603 | BG509597 | BE511826 | AI734699 |
| BE124044 | BE999437 | BE329603 | BM187617 | BE511826 | AI745959 |
| BE124065 | BG647037 | BE329652 | AW152927 | BE511826 | AI820399 |
| BE124065 | CB894635 | BE329804 | AI759742 | BE511826 | AI833630 |
| BE124093 | BE203606 | BE329804 | AI941302 | BE511826 | AI834519 |
| BE124123 | BF003174 | BE329804 | AW306649 | BE511826 | AI834726 |
| BE124217 | CB893616 | BE329804 | AW394733 | BE511826 | BQ279457 |
| BE124226 | BF518800 | BE329804 | AW395154 | BE511826 | BQ621041 |
| BE124248 | BF004682 | BE329804 | AW395362 | BE511826 | BQ635636 |
| BE124278 | BG645833 | BE329804 | AW396267 | BE511826 | BQ744856 |
| BE124396 | BF520127 | BE329804 | AW459484 | BE511826 | BU037393 |
| BE124396 | CB894482 | BE329804 | BE057854 | BE511826 | BU197461 |
| BE124400 | AW573672 | BE329804 | BE058012 | BE511878 | AI665172 |
| BE124400 | AW981138 | BE329804 | BE211335 | BE511878 | AI737935 |
| BE124400 | BE998943 | BE329804 | BE211641 | BE511878 | AI738191 |
| BE124440 | BE124363 | BE329804 | BF069356 | BE511878 | AI745927 |
| BE124440 | BG581691 | BE329804 | BF425117 | BE511878 | AI833764 |
| BE124442 | BG582691 | BE329804 | BI945469 | BE511878 | AI941778 |
| BE124464 | AW573947 | BE329804 | BI972307 | BE511878 | AW05621  |
| BE124464 | AW980517 | BE329804 | BI972319 | BE511878 | AW26721  |
| BE124464 | BE124414 | BE329804 | BQ079526 | BE511878 | AW26732  |
| BE124464 | BE124480 | BE329804 | CX547175 | BE511878 | AW31335  |
| BE124464 | BE998543 | BE329804 | CX547388 | BE511878 | BE186157 |
| BE124464 | BE999887 | BE329804 | CX702437 | BE511878 | BE344695 |
| BE124464 | BG582324 | BE329804 | CX704577 | BE511878 | BE511963 |
| BE124464 | BG582554 | BE329804 | CX705633 | BE511878 | BQ172689 |
| BE124476 | BE999252 | BE329804 | CX710669 | BE511878 | BQ293625 |
| BE124496 | BG582860 | BE329804 | CX710838 | BE511878 | BQ486675 |
| BE124504 | CA919782 | BE329862 | BI426317 | BE511878 | BQ778766 |
| BE124514 | BE124363 | BE329865 | BE329768 | BE511878 | BU102342 |
| BE124530 | AW980452 | BE329898 | BU082665 | BE511878 | BU499143 |
| BE124530 | BE124859 | BE329910 | AI965662 | BE511878 | BU582095 |
| BE124545 | BE997521 | BE329932 | BM954514 | BE511878 | BU582096 |
| BE124578 | BG583270 | BE330089 | CX701997 | BE511953 | AI670658 |
| BE124599 | BG581329 | BE330124 | BQ079454 | BE511953 | AW36063  |
| BE124607 | BF520734 | BE330143 | BQ740779 | BE511953 | AW50693  |
| BE124620 | BG581935 | BE330197 | BQ630257 | BE511953 | BE344921 |
| BE124690 | BE124619 | BE330208 | BE555583 | BE511953 | BE509913 |
| BE124705 | CF069222 | BE330208 | BI317716 | BE511953 | BQ172471 |
| BE124764 | BE124363 | BE330208 | BQ741402 | BE511953 | BU102404 |
| BE124764 | BG581691 | BE330219 | AW423571 | BE511965 | AI740007 |
| BE124770 | BG581691 | BE330433 | BQ612697 | BE512073 | BU499738 |
| BE124795 | BG583044 | BE330676 | BQ785475 | BE512087 | BU079392 |
| BE124799 | CA922644 | BE330701 | AW459036 | BE512128 | BE511084 |

|          |          |          |          |          |          |
|----------|----------|----------|----------|----------|----------|
| BE124809 | AW573929 | BE330701 | BI786971 | BE512145 | AI770359 |
| BE124809 | BG582777 | BE554814 | BQ740638 | BE512145 | BQ164363 |
| BE124809 | BG582881 | BE554872 | BI972353 | BE512145 | BQ279619 |
| BE124809 | BQ750670 | BE554898 | AI966559 | BE512145 | BQ280120 |
| BE124824 | BE999049 | BE554903 | CX707615 | BE512145 | BQ293875 |
| BE124849 | CF069222 | BE554904 | AW733566 | BE512145 | BU093712 |
| BE124875 | CA919782 | BE554904 | BM177376 | BE512216 | AI664916 |
| BE124878 | CA919782 | BE554904 | BQ081010 | BE512268 | BE640198 |
| BE124909 | AW299125 | BE554922 | BQ741434 | BE512268 | BQ487206 |
| BE124909 | BQ255161 | BE554972 | BI893084 | BE512268 | BQ744634 |
| BE124909 | BQ255341 | BE555030 | BQ298717 | BE512307 | BQ034155 |
| BE124925 | AW981096 | BE555030 | BQ298723 | BE512307 | BQ034590 |
| BE124926 | CB892307 | BE555172 | BQ741738 | BE512307 | BQ034698 |
| BE187585 | BM779775 | BE555288 | CX707590 | BE512307 | BQ048174 |
| BE187600 | CA921752 | BE555339 | BU082566 | BE512307 | BQ048206 |
| BE187600 | CA922394 | BE555485 | BQ741659 | BE512308 | BQ048206 |
| BE202496 | BG645781 | BE555485 | CF922892 | BE512328 | BQ744918 |
| BE202539 | BG647965 | BE555485 | CX705868 | BE512355 | BQ279701 |
| BE202598 | BE202492 | BE555502 | BQ080458 | BE512362 | AI670187 |
| BE202613 | CA918865 | BE555502 | BQ080881 | BE512362 | AI712294 |
| BE202613 | CA919049 | BE555509 | CX548003 | BE512362 | AI737693 |
| BE202630 | AW560215 | BE555550 | BQ741738 | BE512362 | AI737935 |
| BE202698 | CB891398 | BE555774 | BG551105 | BE512362 | AI738191 |
| BE202978 | BE942588 | BE555807 | BQ611840 | BE512362 | AI740058 |
| BE203009 | BE239668 | BE555808 | BM187646 | BE512362 | AI833764 |
| BE203009 | BE240646 | BE555850 | BG362847 | BE512362 | AI855013 |
| BE203009 | BF004836 | BE555850 | BQ081577 | BE512362 | AW05426  |
| BE203009 | CB892982 | BE556003 | BM271199 | BE512362 | AW26732  |
| BE203025 | BI309594 | BE556025 | AI965476 | BE512362 | AW31339  |
| BE203118 | BG646316 | BE556069 | BM891462 | BE512362 | BE186629 |
| BE203151 | CB895206 | BE556085 | BI425339 | BE512362 | BE186808 |
| BE203187 | BG647965 | BE556085 | BQ629346 | BE512362 | BE224772 |
| BE203281 | CA990509 | BE556085 | BQ742966 | BE512362 | BE344694 |
| BE203281 | CB891271 | BE556085 | BQ786631 | BE512362 | BE509655 |
| BE203287 | CB892634 | BE556144 | AW306298 | BE512362 | BE511963 |
| BE203378 | CA922394 | BE556235 | BG509972 | BE512362 | BE574985 |
| BE203421 | CB894482 | BE556278 | BM954514 | BE512362 | BE575018 |
| BE203456 | BI308683 | BE556307 | BM523706 | BE512362 | BE638820 |
| BE203601 | BG644861 | BE556312 | BQ740638 | BE512362 | BQ486675 |
| BE203645 | BE204745 | BE556335 | BQ298769 | BE512362 | BQ667799 |
| BE203645 | BE239351 | BE556353 | BE059154 | BE512362 | BQ703325 |
| BE203646 | AW775676 | BE556427 | BQ299017 | BE512362 | BQ744632 |
| BE203693 | BE204300 | BE610013 | CX707406 | BE512362 | BU080247 |
| BE203693 | BE204368 | BE610013 | CX707590 | BE512362 | BU092862 |
| BE203713 | AW560420 | BF066215 | BG511227 | BE512362 | BU093620 |
| BE203720 | BE204368 | BF066551 | BQ629867 | BE512362 | BU097807 |
| BE203720 | BQ165910 | BF066560 | BQ080968 | BE512362 | BU102342 |
| BE203721 | BG644861 | BF066611 | CX548003 | BE512362 | BU499143 |
| BE203742 | AW736523 | BF066660 | BM954514 | BE512362 | BU582095 |
| BE203868 | BE187651 | BF066660 | BQ629524 | BE512369 | BU499510 |
| BE203868 | BE205141 | BF066806 | BQ079391 | BE512441 | BU499813 |
| BE203868 | BF003466 | BF066878 | AW705581 | BE512442 | BU499813 |

|          |          |          |          |          |          |
|----------|----------|----------|----------|----------|----------|
| BE203868 | BG581192 | BF066882 | BQ740566 | BE512448 | BE345365 |
| BE203868 | BG581653 | BF067063 | BG352137 | BE512448 | BQ047978 |
| BE203868 | BG582091 | BF067072 | BQ786706 | BE512473 | BE122948 |
| BE203868 | BG645176 | BF067114 | BG509656 | BE512474 | AW49835  |
| BE203868 | BG646034 | BF067148 | BM954514 | BE512489 | BU499897 |
| BE203868 | BG647642 | BF067148 | BQ629524 | BE512497 | A1834722 |
| BE203868 | BI308066 | BF067251 | BG726714 | BE512508 | A1834722 |
| BE203868 | BI308281 | BF067258 | BM954514 | BE512523 | A1677063 |
| BE203868 | BI308430 | BF067273 | AW395005 | BE512523 | A1739942 |
| BE203868 | BI309674 | BF067276 | BM523706 | BE512523 | AW26759  |
| BE203868 | BI310381 | BF067284 | BM954514 | BE512523 | BE345611 |
| BE203868 | CA916905 | BF067327 | BG511227 | BE512523 | BE510049 |
| BE203868 | CA917308 | BF067388 | BG511227 | BE512523 | BE639720 |
| BE203868 | CA991427 | BF068681 | BE022946 | BE512523 | BQ667840 |
| BE203880 | AW980977 | BF069074 | BM954514 | BE512523 | BQ779399 |
| BE204088 | BG581691 | BF069225 | BQ629524 | BE512523 | BQ779400 |
| BE204134 | BQ164760 | BF069351 | BQ079388 | BE512576 | CA452893 |
| BE204166 | AW774831 | BF070771 | BI972353 | BE512595 | A1833690 |
| BE204203 | AW775451 | BF070775 | AW396522 | BE512612 | AW56622  |
| BE204203 | CB065428 | BF070828 | BF324201 | BE512612 | BE345490 |
| BE204203 | CB065429 | BF070835 | BE330278 | BE512612 | BE345491 |
| BE204248 | BG583466 | BF324150 | BE058694 | BE512612 | BQ294090 |
| BE204248 | BG645315 | BF324319 | BG511227 | BE512612 | BQ294091 |
| BE204258 | AW256317 | BF324335 | CX709825 | BE512612 | BQ486631 |
| BE204258 | AW256360 | BF324408 | BI786851 | BE512612 | BU037952 |
| BE204258 | AW736537 | BF324838 | BQ740386 | BE512612 | BU079820 |
| BE204258 | BE202464 | BF324921 | BM523706 | BE512612 | BU499958 |
| BE204258 | BE202469 | BF325074 | BE556027 | BE512617 | A1737079 |
| BE204258 | BE203041 | BF325074 | BQ080141 | BE512621 | BU499897 |
| BE204258 | BE203958 | BF325099 | BG511227 | BE512622 | A1691829 |
| BE204258 | BE204963 | BF325371 | BE330183 | BE518654 | BE639835 |
| BE204258 | BE205254 | BF325467 | BM886565 | BE518654 | BU079556 |
| BE204258 | BE205330 | BF424553 | BG511227 | BE518845 | A1667817 |
| BE204258 | BF004442 | BF424568 | BG511227 | BE518845 | A1676931 |
| BE204258 | BG644471 | BF425082 | CX708152 | BE518845 | A1711643 |
| BE204258 | BG645360 | BF425424 | BE211746 | BE518845 | A1795305 |
| BE204258 | BQ164895 | BF425561 | A1965464 | BE518845 | BE345863 |
| BE204258 | CB892388 | BF426045 | BG352717 | BE518845 | BE453779 |
| BE204540 | AW774831 | BF596278 | BU082665 | BE518845 | BQ172606 |
| BE204653 | BG644861 | BF596297 | BG511227 | BE518845 | BQ294007 |
| BE204791 | BG644861 | BG043471 | BM886810 | BE518845 | BU093246 |
| BE204836 | BG647923 | BG043591 | CX704197 | BE518845 | BU098337 |
| BE204836 | BG647965 | BG352113 | BG511227 | BE519055 | A1834722 |
| BE204841 | DW017067 | BG352133 | BQ741187 | BE519086 | A1667817 |
| BE204856 | AW559571 | BG352185 | AW306201 | BE519086 | A1676931 |
| BE204875 | BG588621 | BG352185 | AW458736 | BE519086 | A1711643 |
| BE204900 | BM778950 | BG352185 | BE555061 | BE519086 | A1714572 |
| BE204916 | AW774967 | BG352185 | BE555498 | BE519086 | BU098337 |
| BE204916 | BI308509 | BG352185 | BE556205 | BE519086 | BU645322 |
| BE204922 | DW017422 | BG352185 | BI893871 | BE519181 | A1664881 |
| BE205126 | BF004233 | BG352185 | BQ610282 | BE519181 | A1737051 |
| BE205360 | AW774043 | BG352185 | BQ613030 | BE519181 | A1812123 |



|          |          |          |          |          |          |
|----------|----------|----------|----------|----------|----------|
| BE205381 | CF068172 | BG352185 | BQ629924 | BE519181 | BE512170 |
| BE205395 | BF003629 | BG352185 | BQ630242 | BE519181 | BQ295570 |
| BE205395 | BG583142 | BG352185 | BQ740481 | BE519181 | BQ667986 |
| BE205395 | BI309294 | BG352185 | BQ741327 | BE519181 | BQ667987 |
| BE205416 | BG589051 | BG352185 | BQ741380 | BE519181 | BQ703319 |
| BE205416 | BG589134 | BG352185 | BQ741412 | BE519181 | BQ744685 |
| BE205474 | BI308509 | BG352185 | BQ741610 | BE519181 | BU197678 |
| BE205529 | BF005339 | BG352185 | BQ741855 | BE519181 | BU197817 |
| BE239338 | AW981221 | BG352185 | BQ741979 | BE519223 | BE553144 |
| BE239338 | CF068052 | BG352185 | BU082732 | BE519234 | BQ034157 |
| BE239354 | BG588464 | BG352185 | BU082741 | BE519234 | BQ034560 |
| BE239368 | BG648183 | BG352185 | BU082852 | BE519234 | CA408781 |
| BE239398 | BI309412 | BG352198 | BE191276 | BE519235 | CA408781 |
| BE239398 | DW018261 | BG352203 | BQ741738 | BE552542 | BE512430 |
| BE239411 | BG582639 | BG352424 | BQ785475 | BE552635 | BE345916 |
| BE239483 | CA922644 | BG352591 | BG511227 | BE552637 | AI737079 |
| BE239531 | CB892634 | BG352649 | BG511227 | BE552685 | AI657430 |
| BE239565 | BE204173 | BG352813 | BM954514 | BE552685 | AI666206 |
| BE239565 | BG582578 | BG352922 | AI938826 | BE552685 | AI677056 |
| BE239658 | AI974751 | BG352922 | AW119647 | BE552685 | AI711650 |
| BE239710 | BG588464 | BG352922 | AW306471 | BE552685 | AI734489 |
| BE239727 | CA922644 | BG352922 | AW394621 | BE552685 | AI739928 |
| BE239909 | BE997470 | BG352922 | AW423780 | BE552685 | AI740178 |
| BE239909 | CF069871 | BG352922 | AW458949 | BE552685 | AI745813 |
| BE240024 | BE240237 | BG352922 | AW733185 | BE552685 | AW05457  |
| BE240285 | BG646447 | BG352922 | BE191355 | BE552685 | AW31323  |
| BE240286 | BG648985 | BG352922 | BG507817 | BE552685 | BQ172541 |
| BE240320 | BE998411 | BG352922 | BG508365 | BE552685 | BU079948 |
| BE240320 | CF069923 | BG352922 | BG511601 | BE552685 | BU093273 |
| BE240325 | BE998411 | BG352922 | BG652881 | BE552732 | AI664920 |
| BE240325 | CF069923 | BG352922 | BM177180 | BE552732 | AI734736 |
| BE240390 | AW981221 | BG352922 | BM271021 | BE552732 | AI881379 |
| BE240390 | CF068052 | BG352922 | BM271243 | BE552732 | AI987284 |
| BE240412 | CA922644 | BG352922 | BQ298384 | BE552732 | BE345059 |
| BE240689 | BG647177 | BG352922 | BQ298393 | BE552732 | BE639855 |
| BE240727 | DW019206 | BG352922 | BQ298910 | BE552732 | BQ034855 |
| BE940832 | BG588464 | BG352922 | BQ627964 | BE552732 | BQ034918 |
| BE940852 | BI311529 | BG352922 | BQ628152 | BE552732 | BQ048448 |
| BE940947 | BE942364 | BG352922 | BQ628803 | BE552732 | BQ486993 |
| BE941060 | CB892634 | BG352922 | BU577620 | BE552732 | BQ527918 |
| BE941189 | DW016241 | BG352922 | BU577931 | BE552732 | BQ778946 |
| BE941317 | CA923087 | BG352922 | BU578045 | BE552797 | BE575223 |
| BE941409 | CA919521 | BG352922 | BU578364 | BE552801 | BU499738 |
| BE941496 | CA920472 | BG352922 | BU578704 | BE552859 | BE575223 |
| BE941499 | AW774575 | BG352922 | BU578905 | BE553136 | BE509969 |
| BE941517 | BI311529 | BG352922 | BU579015 | BE574986 | AI691213 |
| BE941548 | AW127191 | BG352922 | BU579165 | BE574986 | AI691296 |
| BE941602 | BG646316 | BG352922 | BU765100 | BE574986 | AI691455 |
| BE941619 | AI974751 | BG352922 | BU765972 | BE574986 | AI691906 |
| BE941735 | BI311529 | BG352950 | BM954514 | BE574986 | AI692114 |
| BE941778 | CA919521 | BG352950 | BQ629524 | BE574986 | AI711887 |
| BE941934 | BE124148 | BG362634 | BU765091 | BE574986 | AI734613 |

|          |          |          |          |          |          |
|----------|----------|----------|----------|----------|----------|
| BE941951 | BG588464 | BG362831 | AI965476 | BE574986 | AI734756 |
| BE941983 | BI312001 | BG362840 | BQ627925 | BE574986 | AI738179 |
| BE942053 | BG588464 | BG362852 | BQ741738 | BE574986 | AI770525 |
| BE942143 | BG588464 | BG362853 | BM887269 | BE574986 | AI834505 |
| BE942255 | BF004164 | BG362872 | BM092465 | BE574986 | AI855088 |
| BE942275 | BG646447 | BG362889 | BU579099 | BE574986 | AI881445 |
| BE942427 | BE941676 | BG362889 | BU579181 | BE574986 | AW50688  |
| BE942427 | BE942409 | BG362926 | AI965476 | BE574986 | AW50688  |
| BE942427 | BG587862 | BG362926 | BE058123 | BE574986 | AW56293  |
| BE942427 | CA919893 | BG363004 | AI759742 | BE574986 | AW56619  |
| BE942427 | CF069328 | BG363004 | AI941302 | BE574986 | BE123100 |
| BE942486 | DW019206 | BG363004 | AW306649 | BE574986 | BE186521 |
| BE942527 | BG646316 | BG363004 | AW396267 | BE574986 | BE225311 |
| BE942534 | BG588464 | BG363004 | AW423789 | BE574986 | BE510486 |
| BE942648 | AW774831 | BG363004 | AW458855 | BE574986 | BE510879 |
| BE942660 | CB892755 | BG363004 | AW459139 | BE574986 | BE511312 |
| BE942743 | BG646316 | BG363004 | AW459484 | BE574986 | BE575290 |
| BE943032 | BE942364 | BG363004 | BE023584 | BE574986 | BE639566 |
| BE943147 | BE942409 | BG363004 | BE057833 | BE574986 | BE639567 |
| BE943147 | BG587862 | BG363004 | BE211641 | BE574986 | BQ293657 |
| BE943147 | CA919893 | BG363004 | BF069356 | BE574986 | BQ294028 |
| BE943162 | BG646316 | BG363004 | BF425117 | BE574986 | BQ703866 |
| BE943233 | AW774831 | BG363004 | BI787796 | BE574986 | BU037742 |
| BE943464 | AW208102 | BG363004 | BI972307 | BE574986 | BU093737 |
| BE943464 | AW559467 | BG363004 | BQ079526 | BE574986 | BU097911 |
| BE943464 | AW774562 | BG363004 | CX546967 | BE574986 | BU098432 |
| BE943464 | BE124033 | BG363004 | CX547175 | BE574986 | BU102470 |
| BE943464 | BE124896 | BG363004 | CX704577 | BE574986 | BU499593 |
| BE943464 | BE997914 | BG363035 | AW459711 | BE574986 | CA408408 |
| BE943464 | BE998111 | BG363035 | BQ628370 | BE574986 | CA408416 |
| BE943464 | BE998857 | BG507826 | BQ628008 | BE574986 | CA408943 |
| BE943464 | BF004508 | BG508136 | CX547709 | BE574986 | CA409425 |
| BE943464 | BF518460 | BG508154 | CX708514 | BE575014 | BE509969 |
| BE943464 | BF520185 | BG508283 | BU577664 | BE575038 | AW26729  |
| BE943464 | BF520234 | BG508302 | BQ628008 | BE575038 | BE552682 |
| BE943464 | BG580135 | BG508302 | BQ740638 | BE575038 | BE640332 |
| BE943464 | BG582032 | BG508323 | CX709508 | BE575038 | BQ293378 |
| BE943464 | BG646700 | BG508406 | BQ612340 | BE575038 | BU036992 |
| BE943464 | BG648357 | BG508829 | BQ628008 | BE575066 | BU499738 |
| BE943464 | BM779549 | BG508848 | AW396394 | BE575112 | BE512372 |
| BE943464 | BQ165303 | BG508848 | CX707048 | BE575128 | BQ635452 |
| BE943464 | BQ165304 | BG508858 | AW396394 | BE575267 | BE575223 |
| BE943464 | BQ165525 | BG509070 | AI938774 | BE575309 | AI691706 |
| BE943464 | BQ750494 | BG509070 | AW458432 | BE575309 | BE510225 |
| BE943464 | CA923228 | BG509070 | AW733572 | BE575309 | BE639906 |
| BE943476 | BF520105 | BG509070 | BE022682 | BE638514 | AW49810  |
| BE943506 | BE203518 | BG509070 | BE023983 | BE638525 | BE510425 |
| BE997389 | AW774575 | BG509070 | BE190877 | BE638585 | BQ034157 |
| BE997397 | BG582691 | BG509070 | BG508252 | BE638585 | BQ034560 |
| BE997434 | BG581244 | BG509070 | BG511563 | BE638585 | CA408781 |
| BE997441 | AW774575 | BG509070 | BG511564 | BE638621 | BU499589 |
| BE997477 | BG582691 | BG509070 | BI941602 | BE638728 | AI667866 |

|          |          |          |          |          |          |
|----------|----------|----------|----------|----------|----------|
| BE997494 | BE204888 | BG509070 | BI941699 | BE638804 | AI782965 |
| BE997500 | AW574045 | BG509070 | BM188486 | BE638838 | AI691696 |
| BE997500 | CF069222 | BG509070 | BQ610578 | BE638838 | AI734335 |
| BE997515 | CA919782 | BG509070 | BQ610760 | BE638838 | AI770528 |
| BE997527 | AW981096 | BG509070 | BQ628644 | BE638838 | AI833519 |
| BE997527 | BG582691 | BG509070 | BQ629625 | BE638838 | AI881736 |
| BE997531 | AW127224 | BG509081 | BI423809 | BE638838 | AI881885 |
| BE997531 | AW573947 | BG509081 | BQ079522 | BE638838 | AW06181  |
| BE997531 | AW980406 | BG509081 | BQ742960 | BE638838 | AW49799  |
| BE997531 | AW980517 | BG509081 | BQ785672 | BE638838 | AW56261  |
| BE997531 | BE124414 | BG509081 | BU577677 | BE638838 | BE186787 |
| BE997531 | BE124480 | BG509081 | BU578728 | BE638838 | BE186868 |
| BE997531 | BE998543 | BG509081 | CX711839 | BE638838 | BE238711 |
| BE997531 | BE998671 | BG509260 | AW733987 | BE638838 | BE512158 |
| BE997531 | BE998950 | BG509297 | BQ080968 | BE638838 | BE552672 |
| BE997531 | BE999887 | BG509328 | BG511227 | BE638838 | BE639450 |
| BE997531 | BG581483 | BG509360 | BQ627928 | BE638838 | BE639628 |
| BE997531 | BG582324 | BG509360 | BQ629346 | BE638838 | BE639629 |
| BE997531 | BG582554 | BG509360 | BQ740638 | BE638838 | BQ034301 |
| BE997603 | BE999432 | BG509379 | BG509972 | BE638838 | BQ034371 |
| BE997662 | AW208283 | BG509475 | BG509972 | BE638838 | BQ034845 |
| BE997662 | BE997407 | BG509494 | BU765973 | BE638838 | BQ048256 |
| BE997662 | BG580920 | BG509494 | CX702143 | BE638838 | BQ164452 |
| BE997662 | BG582535 | BG509494 | CX702440 | BE638838 | BQ169300 |
| BE997662 | BG648401 | BG509552 | BG511227 | BE638838 | BQ279373 |
| BE997669 | BE999049 | BG509578 | BG511227 | BE638838 | BQ279550 |
| BE997713 | AW775676 | BG509635 | BG511227 | BE638838 | BQ280262 |
| BE997720 | BE999432 | BG509691 | BI972113 | BE638838 | BQ293423 |
| BE997720 | CF069880 | BG509693 | BG511227 | BE638838 | BQ293775 |
| BE997748 | BE999376 | BG509714 | BG511227 | BE638838 | BQ293829 |
| BE997748 | BG582658 | BG509746 | BG511227 | BE638838 | BQ486867 |
| BE997748 | BQ750668 | BG509771 | BI321518 | BE638838 | BQ487104 |
| BE997748 | CA920261 | BG509771 | BI426085 | BE638838 | BQ529269 |
| BE997849 | AW573766 | BG509771 | BI971723 | BE638838 | BQ539692 |
| BE997849 | AW980562 | BG509771 | BM954426 | BE638838 | BQ621272 |
| BE997849 | BG581100 | BG509771 | BQ080941 | BE638838 | BQ621277 |
| BE997849 | BG581527 | BG509771 | BQ081491 | BE638838 | BQ635526 |
| BE997849 | BG581751 | BG509771 | BQ628017 | BE638838 | BQ703751 |
| BE997849 | BG582170 | BG509771 | BQ742495 | BE638838 | BQ744673 |
| BE997849 | BG582172 | BG509771 | BQ742656 | BE638838 | BQ778778 |
| BE997849 | BG583535 | BG509771 | BQ742891 | BE638838 | BQ833737 |
| BE997915 | AW573687 | BG509771 | BQ785105 | BE638838 | BU036597 |
| BE997926 | BG649043 | BG509771 | BQ785299 | BE638838 | BU079849 |
| BE997944 | AW774575 | BG509771 | BQ785674 | BE638838 | BU093166 |
| BE997966 | AW980690 | BG509771 | BQ786187 | BE638838 | BU098786 |
| BE997991 | CB893592 | BG509771 | BQ786225 | BE638838 | BU499769 |
| BE998032 | BM779931 | BG509771 | BQ786651 | BE638838 | BU572068 |
| BE998033 | BM779931 | BG509980 | BG511227 | BE638838 | BU582207 |
| BE998070 | BF518628 | BG509996 | BQ785382 | BE638838 | BU582263 |
| BE998083 | BE997932 | BG509996 | BU578671 | BE638902 | BU197610 |
| BE998085 | BE997521 | BG509996 | BU765091 | BE638941 | BE345574 |
| BE998145 | CB894551 | BG510012 | BU080759 | BE638941 | BE553097 |

|          |          |          |          |          |          |
|----------|----------|----------|----------|----------|----------|
| BE998158 | BF519705 | BG510025 | BG511227 | BE638993 | BE510425 |
| BE998158 | CA916941 | BG510130 | BQ785382 | BE639004 | AW56622  |
| BE998158 | CB893851 | BG510130 | BU765091 | BE639004 | BE224945 |
| BE998170 | BG583429 | BG511218 | BG511227 | BE639004 | BE345490 |
| BE998220 | CA919782 | BG511235 | BG511227 | BE639004 | BE345491 |
| BE998267 | BG583270 | BG511298 | BG511227 | BE639004 | BE575291 |
| BE998272 | BG581868 | BG511406 | BG511227 | BE639004 | BQ294090 |
| BE998291 | AW573766 | BG511412 | BG511227 | BE639004 | BQ294091 |
| BE998291 | AW980562 | BG511553 | AI930896 | BE639004 | BQ486631 |
| BE998291 | BG581100 | BG511657 | BM522558 | BE639004 | BU037952 |
| BE998291 | BG581527 | BG511657 | BM954464 | BE639004 | BU079820 |
| BE998291 | BG581751 | BG511657 | CX706522 | BE639004 | BU499958 |
| BE998291 | BG582170 | BG511692 | BQ612340 | BE639080 | AW05597  |
| BE998291 | BG582172 | BG511728 | BQ628008 | BE639080 | BQ172574 |
| BE998291 | BG583535 | BG511834 | CX548582 | BE639080 | BU093744 |
| BE998297 | BG583270 | BG550583 | BG511227 | BE639105 | BU499589 |
| BE998302 | AW981096 | BG550624 | BE330472 | BE639120 | BE345574 |
| BE998302 | BG582691 | BG550628 | BG511227 | BE639120 | BE553097 |
| BE998338 | BG644861 | BG550687 | BG511227 | BE639143 | BQ486843 |
| BE998360 | BG583128 | BG550716 | BG511227 | BE639143 | BU582338 |
| BE998366 | AW574045 | BG550752 | BG511227 | BE639152 | BE511084 |
| BE998366 | CF069222 | BG550838 | BE330183 | BE639165 | AI737079 |
| BE998394 | BG583270 | BG550839 | BG511227 | BE639214 | AI740007 |
| BE998425 | BG644861 | BG550852 | BG511227 | BE639214 | AI820187 |
| BE998442 | AW574045 | BG550860 | BG511227 | BE639257 | BQ668237 |
| BE998442 | CF069222 | BG550887 | CX547614 | BE639264 | CA452894 |
| BE998445 | BG581244 | BG550948 | BE211746 | BE639302 | BU499813 |
| BE998481 | AW127197 | BG550985 | BG511227 | BE639308 | AI737079 |
| BE998485 | BG648909 | BG551002 | BM887180 | BE639341 | BQ172592 |
| BE998550 | AW573672 | BG551047 | BG511227 | BE639384 | BQ034092 |
| BE998601 | BF518800 | BG551062 | BI423783 | BE639384 | BQ034581 |
| BE998601 | BF519763 | BG551062 | BI426085 | BE639384 | BQ034710 |
| BE998616 | AW573766 | BG551062 | BI971582 | BE639384 | BQ048055 |
| BE998616 | AW980562 | BG551062 | BM954426 | BE639384 | BQ048082 |
| BE998616 | BG581100 | BG551062 | BQ080941 | BE639384 | BQ048134 |
| BE998616 | BG581527 | BG551062 | BQ081491 | BE639384 | BQ279418 |
| BE998616 | BG581751 | BG551062 | BQ628017 | BE639384 | BU092746 |
| BE998616 | BG582170 | BG551062 | BQ742495 | BE639427 | BU197817 |
| BE998616 | BG582172 | BG551062 | BQ742744 | BE639427 | BU499312 |
| BE998616 | BG583535 | BG551062 | BQ742891 | BE639473 | AI667866 |
| BE998633 | AW573766 | BG551062 | BQ785393 | BE639588 | AI666072 |
| BE998633 | AW980562 | BG551062 | BQ785674 | BE639588 | AI666091 |
| BE998633 | BG581100 | BG551062 | BQ786187 | BE639588 | AI666216 |
| BE998633 | BG581527 | BG551062 | BQ786225 | BE639588 | AI691163 |
| BE998633 | BG581751 | BG551062 | BQ786651 | BE639588 | AI691334 |
| BE998633 | BG582170 | BG551076 | BG511227 | BE639588 | AI691646 |
| BE998633 | BG582172 | BG551113 | BG511227 | BE639588 | AI692041 |
| BE998633 | BG583535 | BG551149 | BE022682 | BE639588 | AI711628 |
| BE998635 | BE239993 | BG551149 | BG511563 | BE639588 | AI734408 |
| BE998751 | BG582951 | BG551149 | BI941602 | BE639588 | AI734537 |
| BE998790 | BE999049 | BG551149 | BI941699 | BE639588 | AI734599 |
| BE998790 | BG583270 | BG551149 | BQ610760 | BE639588 | AI734630 |

|          |          |          |          |          |          |
|----------|----------|----------|----------|----------|----------|
| BE998804 | AW775378 | BG551149 | BQ628644 | BE639588 | AI734751 |
| BE998804 | BF518532 | BG551154 | BG511227 | BE639588 | AI737198 |
| BE998804 | BG647741 | BG551186 | BM187879 | BE639588 | AI737241 |
| BE998804 | BG648106 | BG551186 | BQ628285 | BE639588 | AI738124 |
| BE998804 | CA917449 | BG551200 | BG511227 | BE639588 | AI738308 |
| BE998804 | CA917872 | BG551287 | CX547358 | BE639588 | AI759083 |
| BE998816 | CA923087 | BG650225 | BE022682 | BE639588 | AI770412 |
| BE998817 | BE999252 | BG650225 | BG511564 | BE639588 | AI770683 |
| BE998878 | BM779990 | BG650225 | BQ628644 | BE639588 | AI770712 |
| BE998878 | BM780240 | BG650225 | BQ628780 | BE639588 | AI834715 |
| BE998884 | BF004164 | BG650266 | BQ628008 | BE639588 | AI834753 |
| BE998890 | CA919905 | BG650296 | CX547709 | BE639588 | AI881931 |
| BE998898 | BG582951 | BG650296 | CX702573 | BE639588 | AI941508 |
| BE998910 | BG647923 | BG650398 | BQ628008 | BE639588 | AI943617 |
| BE998941 | AW574045 | BG652863 | BQ742762 | BE639588 | AW35266  |
| BE998941 | CF069222 | BG725937 | CX706402 | BE639588 | AW45311  |
| BE998984 | AW574045 | BG725946 | CX547026 | BE639588 | AW50694  |
| BE998984 | CF069222 | BG725946 | CX702333 | BE639588 | AW56303  |
| BE999054 | BE187505 | BG726001 | AW424116 | BE639588 | AW56637  |
| BE999069 | AW574045 | BG726385 | BG511227 | BE639588 | BE186595 |
| BE999069 | CF069222 | BG726682 | BQ629524 | BE639588 | BE345776 |
| BE999093 | BG648846 | BG726747 | BF324205 | BE639588 | BE453716 |
| BE999102 | BE999049 | BG726770 | BM954514 | BE639588 | BE510636 |
| BE999159 | AW574045 | BG726817 | BI426106 | BE639588 | BE510637 |
| BE999159 | CF069222 | BG726817 | BQ612579 | BE639588 | BE511211 |
| BE999181 | CF069222 | BG726818 | BF067003 | BE639588 | BE519023 |
| BE999211 | BE999252 | BG726905 | CF922816 | BE639588 | BE552807 |
| BE999240 | BG583866 | BI317644 | CX709700 | BE639588 | BE639466 |
| BE999327 | BE999049 | BI317653 | BI426254 | BE639588 | BE640130 |
| BE999353 | BF004164 | BI317684 | BU082665 | BE639588 | BE640131 |
| BE999354 | BF004164 | BI317785 | BI944842 | BE639588 | BE640244 |
| BE999363 | BM779990 | BI317796 | BQ740638 | BE639588 | BQ172525 |
| BE999566 | AW127224 | BI317803 | AI899851 | BE639588 | BQ295631 |
| BE999566 | AW573947 | BI317803 | AI930833 | BE639588 | BQ401180 |
| BE999566 | AW980406 | BI317803 | AI938614 | BE639588 | BQ486714 |
| BE999566 | AW980517 | BI317803 | AI939245 | BE639588 | BQ486784 |
| BE999566 | BE124414 | BI317803 | AI960203 | BE639588 | BQ528021 |
| BE999566 | BE124480 | BI317803 | AW152978 | BE639588 | BQ547610 |
| BE999566 | BE998543 | BI317803 | AW156153 | BE639588 | BQ547861 |
| BE999566 | BE998950 | BI317803 | AW423477 | BE639588 | BQ620878 |
| BE999566 | BE999887 | BI317803 | AW423667 | BE639588 | BQ667948 |
| BE999566 | BG582324 | BI317803 | AW458954 | BE639588 | BQ668097 |
| BE999566 | BG582554 | BI317803 | BE023798 | BE639588 | BQ668214 |
| BE999587 | BE999049 | BI317803 | BE023953 | BE639588 | BQ744825 |
| BE999590 | AW573995 | BI317803 | BE057076 | BE639588 | BQ744835 |
| BE999591 | BE239488 | BI317803 | BE058687 | BE639588 | BQ778729 |
| BE999595 | CB892307 | BI317803 | BE059166 | BE639588 | BQ778790 |
| BE999647 | BG582691 | BI317803 | BE191242 | BE639588 | BQ779060 |
| BE999666 | AW574045 | BI317803 | BE191253 | BE639588 | BU036874 |
| BE999666 | CF069222 | BI317803 | BE555367 | BE639588 | BU037272 |
| BE999690 | BE998373 | BI317803 | BE555697 | BE639588 | BU037472 |
| BE999750 | BG582691 | BI317803 | BE555942 | BE639588 | BU079814 |

|          |          |          |          |          |          |
|----------|----------|----------|----------|----------|----------|
| BE999764 | BF003676 | BI317803 | BF067382 | BE639588 | BU080276 |
| BE999764 | DW016609 | BI317803 | BI320264 | BE639588 | BU092407 |
| BE999764 | DW017288 | BI317803 | BI321369 | BE639588 | BU093725 |
| BE999776 | BE999361 | BI317803 | BI424919 | BE639588 | BU098290 |
| BE999824 | BG644861 | BI317803 | BI426292 | BE639588 | BU098687 |
| BE999843 | CA919782 | BI317803 | BI893272 | BE639588 | BU098688 |
| BE999857 | BG647923 | BI317803 | BI893413 | BE639588 | BU197724 |
| BE999877 | CA921114 | BI317803 | BI945356 | BE639588 | BU499153 |
| BE999895 | CB895124 | BI317803 | BI975040 | BE639588 | BU499154 |
| BE999911 | AW574045 | BI317803 | BM092409 | BE639588 | BU499266 |
| BF003164 | BE942814 | BI317803 | BM523125 | BE639588 | BU499411 |
| BF003201 | BG648015 | BI317803 | BM886579 | BE639588 | BU645417 |
| BF003287 | DW017422 | BI317803 | BM886606 | BE639611 | BE510425 |
| BF003367 | BI308683 | BI317803 | BM886744 | BE639612 | BE510425 |
| BF003367 | DW015986 | BI317803 | BM891341 | BE639658 | BU197452 |
| BF003481 | CB065437 | BI317803 | BM891352 | BE639666 | AI667866 |
| BF003482 | BM779990 | BI317803 | BQ610457 | BE639738 | AI657414 |
| BF003482 | BM780240 | BI317803 | BQ628785 | BE639738 | AI664940 |
| BF003526 | BI309594 | BI317803 | BQ629021 | BE639738 | AI712091 |
| BF003628 | BG644861 | BI317803 | BQ629915 | BE639738 | AW56636  |
| BF003683 | AW774715 | BI317803 | BQ629997 | BE639746 | AI673867 |
| BF003683 | BE203394 | BI317803 | BQ740298 | BE639746 | BQ293385 |
| BF003683 | BE239668 | BI317803 | BQ741127 | BE639746 | BQ621091 |
| BF003683 | BE239748 | BI317803 | BQ741176 | BE639752 | BU571922 |
| BF003683 | BE239777 | BI317803 | BQ741963 | BE639892 | AI734794 |
| BF003683 | BG588384 | BI317803 | BQ742307 | BE639892 | BE224917 |
| BF003683 | BG589019 | BI317803 | BQ742989 | BE639972 | BE575223 |
| BF003683 | BQ165174 | BI317803 | BQ785193 | BE639973 | BE575223 |
| BF003683 | BQ165383 | BI317803 | BQ785993 | BE640003 | BE575223 |
| BF003750 | BE942588 | BI317803 | BQ786111 | BE640004 | BE575223 |
| BF003803 | AW256564 | BI317803 | BQ786129 | BE640009 | AI745766 |
| BF003803 | BE187542 | BI317803 | BU577245 | BE640009 | BE575186 |
| BF003803 | BM780219 | BI317803 | BU577370 | BE640009 | BE644296 |
| BF003806 | BF004164 | BI317803 | CX706724 | BE640010 | AI745766 |
| BF003829 | BG646589 | BI317806 | BI971723 | BE640010 | BE644296 |
| BF003864 | BG646090 | BI317806 | BM954426 | BE640018 | BE510425 |
| BF004000 | BG647965 | BI317806 | BM954539 | BE640019 | BE510425 |
| BF004021 | BG646316 | BI317806 | BQ628017 | BE640037 | AI833617 |
| BF004038 | BM780240 | BI317806 | BQ740456 | BE640046 | AI740007 |
| BF004077 | BF004682 | BI317806 | BQ742891 | BE640050 | AI745742 |
| BF004116 | BG648985 | BI320220 | BI423783 | BE640053 | BE510425 |
| BF004205 | BG580602 | BI320220 | BI971582 | BE640054 | BE510425 |
| BF004423 | BE202402 | BI320220 | BM954426 | BE640076 | CA452894 |
| BF004423 | CA921476 | BI320220 | BQ080941 | BE640104 | AI670658 |
| BF004514 | BF005611 | BI320220 | BQ742495 | BE640104 | AW36063  |
| BF004521 | BG644950 | BI320220 | BQ742744 | BE640104 | AW50693  |
| BF004521 | BG648681 | BI320220 | BQ785393 | BE640104 | BE344921 |
| BF004521 | BM779970 | BI320220 | BQ785674 | BE640104 | BE509913 |
| BF004676 | CA919216 | BI320220 | BQ786187 | BE640104 | BQ172471 |
| BF004677 | CA919216 | BI320220 | BQ786225 | BE640104 | BU102404 |
| BF004749 | BG588507 | BI320222 | AW156460 | BE640104 | BU571640 |
| BF004752 | BG644623 | BI320222 | AW432569 | BE640105 | AI670658 |

|          |          |          |          |          |          |
|----------|----------|----------|----------|----------|----------|
| BF004763 | BM780187 | BI320222 | BG550884 | BE640105 | AW36063  |
| BF005045 | BE124363 | BI320222 | BM177199 | BE640105 | AW50693  |
| BF005221 | BI312001 | BI320222 | BM187627 | BE640105 | BE509913 |
| BF005367 | BM778950 | BI320222 | BQ740456 | BE640105 | BQ172471 |
| BF005558 | DW017304 | BI320222 | BQ742339 | BE640105 | BU080222 |
| BF005638 | AW127695 | BI320222 | BQ742495 | BE640105 | BU102404 |
| BF005638 | BF005190 | BI320222 | BQ742656 | BE640126 | CA452893 |
| BF005638 | BF006601 | BI320222 | BQ742960 | BE640126 | CA452894 |
| BF005638 | BF519449 | BI320222 | BQ785672 | BE640164 | BE345490 |
| BF005678 | BF006486 | BI320222 | BQ785674 | BE640164 | BE345491 |
| BF005690 | BF005190 | BI320222 | BQ786243 | BE640164 | BQ294091 |
| BF005690 | BF006601 | BI320222 | BU577039 | BE640164 | BQ486631 |
| BF005690 | BF519449 | BI320222 | BU577677 | BE640164 | BU079820 |
| BF005690 | DW019226 | BI320222 | BU578728 | BE640182 | BU197734 |
| BF005709 | BG646447 | BI320222 | BU762186 | BE640186 | AW56622  |
| BF006029 | AW267866 | BI320222 | BU762350 | BE640186 | BQ294090 |
| BF006198 | AW127695 | BI320222 | CX711839 | BE640186 | BQ486631 |
| BF006198 | BF006601 | BI320240 | BG550884 | BE640302 | A1737079 |
| BF006261 | BF005190 | BI320240 | BM177199 | BE640315 | A1670649 |
| BF006261 | BF006601 | BI320240 | BM187627 | BE640315 | A1711732 |
| BF006261 | DW019226 | BI320240 | BQ740499 | BE640315 | A1820204 |
| BF006399 | BG583044 | BI320240 | BQ742656 | BE640315 | BE510609 |
| BF006436 | BF004532 | BI320240 | BQ742960 | BE640315 | BE511816 |
| BF006442 | CA916936 | BI320240 | BQ743098 | BE640315 | BE552653 |
| BF006534 | BF005190 | BI320240 | BQ785612 | BE640357 | A1664920 |
| BF006534 | BF519449 | BI320240 | BQ785672 | BE640357 | A1666184 |
| BF006562 | AW980341 | BI320240 | BU762186 | BE640357 | A1691544 |
| BF006642 | AW560413 | BI320353 | BQ612579 | BE640357 | A1734659 |
| BF006675 | AW776361 | BI320353 | BU578426 | BE640357 | A1734736 |
| BF518443 | BF004164 | BI321042 | BQ785707 | BE640357 | A1881379 |
| BF518595 | CA917628 | BI321570 | BM092505 | BE640357 | A1987284 |
| BF518622 | BF519733 | BI321638 | BI423783 | BE640357 | AW05596  |
| BF518660 | BF003601 | BI321638 | BI971582 | BE640357 | BE345059 |
| BF518766 | BF005138 | BI321638 | BM954426 | BE640357 | BE475933 |
| BF518766 | BG582948 | BI321638 | BM954541 | BE640357 | BE511999 |
| BF518845 | BG645403 | BI321638 | BQ080941 | BE640357 | BE639854 |
| BF518845 | BI308067 | BI321638 | BQ081491 | BE640357 | BQ034382 |
| BF518845 | CA917612 | BI321638 | BQ742495 | BE640357 | BQ034855 |
| BF518890 | CA917641 | BI321638 | BQ742656 | BE640357 | BQ034918 |
| BF518903 | DW015139 | BI321638 | BQ742744 | BE640357 | BQ048448 |
| BF518945 | AW776491 | BI321638 | BQ742970 | BE640357 | BQ279596 |
| BF519061 | CB892742 | BI321638 | BQ785104 | BE640357 | BQ486844 |
| BF519089 | BF005362 | BI321638 | BQ785393 | BE640357 | BQ486845 |
| BF519089 | BM779867 | BI321638 | BQ785674 | BE640357 | BQ486993 |
| BF519091 | BG644861 | BI321638 | BQ786187 | BE640357 | BQ527918 |
| BF519253 | AW776451 | BI321638 | BQ786225 | BE640357 | BQ529226 |
| BF519334 | BG646447 | BI423733 | BI423783 | BE640357 | BQ539668 |
| BF519336 | BE999256 | BI423733 | BI971582 | BE640357 | BQ778946 |
| BF519336 | BF520306 | BI423733 | BM954426 | BE640357 | BU080095 |
| BF519371 | BF003601 | BI423733 | BQ080941 | BE640357 | BU098227 |
| BF519415 | DW018086 | BI423733 | BQ081491 | BE640357 | BU197514 |
| BF519455 | BG647695 | BI423733 | BQ628017 | BE640403 | BE575223 |

|          |          |          |          |          |          |
|----------|----------|----------|----------|----------|----------|
| BF519458 | AW559571 | BI423733 | BQ742495 | BE644284 | BE510425 |
| BF519534 | AW267866 | BI423733 | BQ742656 | BE644331 | BE509969 |
| BF519558 | AW127345 | BI423733 | BQ742744 | BE644379 | BU079961 |
| BF519584 | BG646316 | BI423733 | BQ742891 | BE644379 | BU098919 |
| BF519604 | BF005110 | BI423733 | BQ785105 | BE644442 | BU037667 |
| BF519614 | AW775518 | BI423733 | BQ785299 | BM41681  | BU197939 |
| BF519614 | AW775850 | BI423733 | BQ785393 | BM41687  | BE224945 |
| BF519614 | AW776197 | BI423733 | BQ785674 | BM41687  | BE345490 |
| BF519614 | AW776254 | BI423733 | BQ786187 | BM41687  | BE345491 |
| BF519614 | AW776327 | BI423733 | BQ786225 | BM41687  | BQ294090 |
| BF519614 | AW776693 | BI423736 | BI423783 | BM41687  | BU037952 |
| BF519614 | BE123917 | BI423736 | BI426085 | BM41687  | BU079820 |
| BF519614 | BF003282 | BI423736 | BI971582 | BM41687  | BU499958 |
| BF519614 | BF005013 | BI423736 | BM954426 | BQ034048 | AI665482 |
| BF519614 | BF005184 | BI423736 | BM954541 | BQ034245 | AI834722 |
| BF519614 | BF005194 | BI423736 | BQ080941 | BQ034275 | AI833690 |
| BF519614 | BF005513 | BI423736 | BQ081491 | BQ034332 | AI668287 |
| BF519614 | BF005625 | BI423736 | BQ628017 | BQ034332 | AW26729  |
| BF519614 | BF005914 | BI423736 | BQ742495 | BQ034332 | BQ172683 |
| BF519614 | BF005965 | BI423736 | BQ742656 | BQ034332 | BQ635452 |
| BF519614 | BF005970 | BI423736 | BQ742744 | BQ034407 | BU037107 |
| BF519614 | BF006025 | BI423736 | BQ742891 | BQ034447 | AI665482 |
| BF519614 | BF006325 | BI423736 | BQ742970 | BQ034476 | BE345611 |
| BF519614 | BF006336 | BI423736 | BQ785104 | BQ034476 | BE510049 |
| BF519614 | BF006473 | BI423736 | BQ785393 | BQ034476 | BQ779400 |
| BF519614 | BF006548 | BI423736 | BQ785674 | BQ034530 | AI739942 |
| BF519614 | BF518575 | BI423736 | BQ786187 | BQ034530 | AW26759  |
| BF519614 | BF519865 | BI423736 | BQ786225 | BQ034530 | BE639720 |
| BF519614 | BF520166 | BI423736 | BQ786651 | BQ034530 | BQ667840 |
| BF519614 | BF520253 | BI423750 | AW156567 | BQ034530 | BQ779399 |
| BF519614 | BF520821 | BI423763 | BQ740638 | BQ034530 | BQ779400 |
| BF519614 | BI309142 | BI423807 | BI423783 | BQ034545 | BQ527979 |
| BF519614 | CA917506 | BI423807 | BI971582 | BQ034545 | BU037375 |
| BF519614 | CB893970 | BI423807 | BM954426 | BQ034545 | BU080104 |
| BF519614 | CB894382 | BI423807 | BM954541 | BQ034545 | BU098062 |
| BF519648 | CB893088 | BI423807 | BQ080941 | BQ034545 | BU499434 |
| BF519651 | BE999367 | BI423807 | BQ081491 | BQ034545 | BU571845 |
| BF519706 | DW017422 | BI423807 | BQ628017 | BQ034552 | AI668385 |
| BF519723 | BF519733 | BI423807 | BQ742495 | BQ034552 | AI739942 |
| BF519728 | BG646447 | BI423807 | BQ742656 | BQ034552 | AI833869 |
| BF519956 | DW016348 | BI423807 | BQ742891 | BQ034552 | AW26759  |
| BF520072 | AW560420 | BI423807 | BQ742970 | BQ034552 | BE345611 |
| BF520077 | BI309504 | BI423807 | BQ785104 | BQ034552 | BE639720 |
| BF520081 | BG644861 | BI423807 | BQ785105 | BQ034552 | BQ667840 |
| BF520281 | BE941813 | BI423807 | BQ785299 | BQ034552 | BQ779399 |
| BF520281 | BG648489 | BI423807 | BQ785674 | BQ034552 | BQ779400 |
| BF520281 | DW016624 | BI423807 | BQ786187 | BQ034558 | AI692016 |
| BF520319 | BE998513 | BI423807 | BQ786225 | BQ034558 | AW05568  |
| BF520345 | BG648408 | BI423807 | BQ786651 | BQ034558 | BE345195 |
| BF520364 | BG645491 | BI423834 | BG507804 | BQ034558 | BQ486806 |
| BF520457 | BF520105 | BI423834 | BI423741 | BQ034558 | BU037642 |
| BF520622 | BE941539 | BI423843 | BG363068 | BQ034662 | BQ034658 |



|          |          |          |          |          |          |
|----------|----------|----------|----------|----------|----------|
| BF520622 | BG581972 | BI423843 | BQ629489 | BQ034693 | BQ034658 |
| BF520622 | CA919999 | BI423850 | BU082665 | BQ034757 | BU572014 |
| BF520622 | CF069541 | BI423876 | AI960465 | BQ034768 | AI834722 |
| BF520642 | CA917474 | BI425259 | BG551161 | BQ034775 | BU197944 |
| BF520747 | BE941539 | BI425302 | BQ740569 | BQ034782 | BE186565 |
| BF520747 | BG581972 | BI425302 | BQ785296 | BQ034805 | AI668287 |
| BF520747 | CA919999 | BI425302 | BQ785357 | BQ034805 | AI691784 |
| BF520747 | CF069541 | BI425302 | BQ785474 | BQ034805 | AW26729  |
| BF520794 | DW015551 | BI425302 | BQ785489 | BQ034805 | BQ172683 |
| BF520900 | BF519042 | BI425302 | BQ786684 | BQ034815 | BU571694 |
| BF520991 | BG646447 | BI425321 | BQ741738 | BQ034895 | BU037107 |
| BF521042 | BG647810 | BI425340 | BQ628920 | BQ035041 | AW17200  |
| BF521093 | AW560420 | BI425340 | CX547224 | BQ035044 | BU197944 |
| BF521206 | BG581972 | BI426155 | BE059160 | BQ035045 | BU197944 |
| BF521206 | CA919999 | BI426317 | BQ627664 | BQ035123 | AW31343  |
| BF521260 | BE941813 | BI426317 | CX548810 | BQ035123 | AW49746  |
| BF521260 | BE943097 | BI426324 | BQ628008 | BQ035123 | BQ280203 |
| BF521260 | BG648489 | BI786807 | CX710461 | BQ035131 | BE639346 |
| BF521260 | DW016624 | BI786821 | BM092334 | BQ035139 | AW17941  |
| BF521295 | BG648408 | BI786879 | BU579284 | BQ035144 | BU080447 |
| BF521377 | CA922394 | BI786879 | CX711687 | BQ047990 | BQ528238 |
| BF521434 | CB891276 | BI786930 | BM093963 | BQ047990 | BQ744640 |
| BF521485 | AW127191 | BI786963 | BI894135 | BQ048005 | AI668385 |
| BF521485 | AW775557 | BI787764 | BG509974 | BQ048005 | AI677063 |
| BF521485 | BQ255182 | BI787768 | CX705595 | BQ048005 | AI739942 |
| BF521509 | BF004576 | BI787797 | CX705592 | BQ048005 | AI833869 |
| BF521513 | BI309115 | BI787806 | AI965476 | BQ048005 | AW26759  |
| BF521521 | BG648408 | BI787817 | BQ742403 | BQ048005 | BE345611 |
| BF521543 | AW981221 | BI787828 | BM954514 | BQ048005 | BE639720 |
| BF521543 | CF068052 | BI787828 | BQ629524 | BQ048005 | BQ667840 |
| BG580044 | AW574045 | BI787843 | BM177314 | BQ048005 | BQ779399 |
| BG580044 | CF069222 | BI787864 | AW706006 | BQ048005 | BQ779400 |
| BG580078 | BQ750668 | BI787878 | BE555058 | BQ048010 | AI739942 |
| BG580078 | CA920261 | BI787883 | AW733849 | BQ048010 | AI833869 |
| BG580092 | BE997521 | BI787883 | BE330494 | BQ048010 | AW26759  |
| BG580094 | BE997521 | BI787883 | BG363010 | BQ048010 | BE345611 |
| BG580112 | CB892634 | BI787883 | BG363011 | BQ048010 | BE510049 |
| BG580154 | DW016400 | BI787883 | BI786867 | BQ048010 | BQ667840 |
| BG580156 | AW574045 | BI787883 | BI787779 | BQ048010 | BQ779399 |
| BG580156 | CF069222 | BI787883 | BI972121 | BQ048010 | BQ779400 |
| BG580187 | BG582777 | BI787883 | BQ080257 | BQ048130 | BE345611 |
| BG580187 | BG582881 | BI787883 | BQ080332 | BQ048130 | BE510049 |
| BG580187 | BQ750670 | BI787883 | BQ080333 | BQ048130 | BE639720 |
| BG580232 | BE998373 | BI787883 | BQ080381 | BQ048130 | BQ667840 |
| BG580235 | CB892307 | BI787883 | BQ080517 | BQ048239 | BQ034157 |
| BG580247 | BE999049 | BI787883 | BQ080725 | BQ048239 | BQ034560 |
| BG580253 | BG582986 | BI787883 | BQ080868 | BQ048247 | BU098084 |
| BG580257 | AW267866 | BI787883 | BQ081736 | BQ048284 | BQ547810 |
| BG580265 | BG582951 | BI787883 | BQ740865 | BQ048284 | BU093636 |
| BG580332 | CF069222 | BI787883 | CX546937 | BQ048284 | BU499862 |
| BG580427 | BE999547 | BI787892 | BQ612429 | BQ048297 | BU571694 |
| BG580446 | BE999049 | BI787946 | BQ741738 | BQ048390 | BE225270 |

|          |          |          |          |          |          |
|----------|----------|----------|----------|----------|----------|
| BG580446 | BG583270 | BI788011 | BM887269 | BQ048412 | BU499510 |
| BG580472 | BE124368 | BI788031 | BQ081764 | BQ048438 | AW17204  |
| BG580472 | BE124619 | BI788031 | BQ630363 | BQ134169 | AI692083 |
| BG580472 | BE997566 | BI788031 | BQ741140 | BQ134198 | AI834722 |
| BG580472 | BG581312 | BI788031 | BQ741406 | BQ134214 | AI770599 |
| BG580472 | BG583705 | BI788031 | BQ742759 | BQ134214 | AI770766 |
| BG580472 | BG583914 | BI788031 | BQ785360 | BQ134245 | BQ034653 |
| BG580472 | CA919956 | BI788031 | BU082799 | BQ134245 | CA408781 |
| BG580472 | CF069418 | BI788031 | BU082892 | BQ134252 | BQ295673 |
| BG580478 | CB892655 | BI892825 | CX702392 | BQ134256 | BE511084 |
| BG580516 | BE999049 | BI892857 | AI966777 | BQ134274 | AI770701 |
| BG580516 | BG583270 | BI892925 | BM954514 | BQ134333 | AI668385 |
| BG580518 | BE998373 | BI893093 | BQ786637 | BQ134333 | AI739942 |
| BG580524 | BE998732 | BI893093 | BU577889 | BQ134333 | AI833869 |
| BG580537 | AW574045 | BI893129 | AW396294 | BQ134333 | AW26759  |
| BG580537 | CF069222 | BI893129 | BE329608 | BQ134333 | BE510049 |
| BG580553 | BE997758 | BI893129 | CX548327 | BQ134333 | BE512176 |
| BG580553 | BE999376 | BI893219 | BM886952 | BQ134333 | BE639720 |
| BG580553 | BG582658 | BI893274 | BM093869 | BQ134333 | BQ667840 |
| BG580553 | BQ750668 | BI893274 | CX547529 | BQ134333 | BQ779399 |
| BG580553 | CA920261 | BI893274 | CX704816 | BQ134333 | BQ779400 |
| BG580572 | BG647923 | BI893274 | CX709812 | BQ134388 | AI833690 |
| BG580572 | BG647965 | BI893321 | BU578814 | BQ134517 | BQ034157 |
| BG580613 | BG582951 | BI893340 | AW458307 | BQ134517 | BQ034653 |
| BG580675 | CB892634 | BI893340 | CX711917 | BQ134517 | CA408781 |
| BG580703 | AW573766 | BI893347 | CX703436 | BQ134539 | BU098084 |
| BG580703 | AW980562 | BI893433 | BQ785475 | BQ134544 | BU037107 |
| BG580703 | BG581100 | BI893468 | AW396822 | BQ134605 | AI739942 |
| BG580703 | BG581527 | BI893468 | BF070796 | BQ134605 | AI833869 |
| BG580703 | BG581751 | BI893468 | BI893178 | BQ134605 | AW26759  |
| BG580703 | BG582170 | BI893468 | BI894129 | BQ134605 | BE345611 |
| BG580703 | BG582172 | BI893558 | BQ741973 | BQ134605 | BE510049 |
| BG580703 | BG583535 | BI893558 | BU766010 | BQ134605 | BQ667840 |
| BG580717 | BG582366 | BI893558 | CX708522 | BQ134605 | BQ779399 |
| BG580736 | BG582691 | BI893558 | CX710575 | BQ134605 | BQ779400 |
| BG580750 | BG582881 | BI893685 | BQ785377 | BQ164222 | BE552830 |
| BG580756 | AI974606 | BI893705 | BI786833 | BQ164291 | BU571537 |
| BG580756 | CB894482 | BI893877 | BI321559 | BQ164294 | AW49806  |
| BG580807 | BE999049 | BI893892 | AW459806 | BQ164390 | AI834722 |
| BG580816 | BI312001 | BI893892 | BE329983 | BQ164422 | BE453811 |
| BG580831 | BE999252 | BI893892 | BG726671 | BQ164436 | BE509969 |
| BG580856 | AW981096 | BI893892 | BM523474 | BQ164493 | BU499847 |
| BG580856 | BG582691 | BI893892 | BQ612313 | BQ164535 | AW52028  |
| BG580889 | CF069437 | BI893930 | BM886952 | BQ164550 | AI834646 |
| BG580893 | AW573672 | BI893974 | BI893084 | BQ164550 | AW35258  |
| BG580893 | AW981138 | BI894046 | AW423499 | BQ164550 | AW50662  |
| BG580893 | BE998943 | BI894046 | BQ610948 | BQ164550 | BQ279735 |
| BG580908 | BE999049 | BI894046 | CX703540 | BQ164550 | BQ401189 |
| BG580908 | BG583270 | BI894047 | BG509972 | BQ164550 | BQ529159 |
| BG580931 | BE999820 | BI894057 | CX705879 | BQ164550 | BQ668271 |
| BG580956 | BG581972 | BI894105 | BF425230 | BQ164550 | BQ744780 |
| BG580956 | CF069541 | BI894124 | BQ629614 | BQ164550 | BQ779016 |

|          |          |          |          |          |          |
|----------|----------|----------|----------|----------|----------|
| BG580999 | BG581204 | BI894124 | BQ741935 | BQ164550 | BQ779086 |
| BG580999 | BG581435 | BI941631 | AW423722 | BQ164550 | BU036847 |
| BG581031 | BE999049 | BI941643 | CX548075 | BQ164550 | BU037622 |
| BG581031 | BG583270 | BI941643 | CX703815 | BQ164550 | BU079797 |
| BG581062 | AW127152 | BI941690 | BU577994 | BQ164550 | BU092380 |
| BG581062 | BG583466 | BI941845 | BI945349 | BQ172540 | AW05568  |
| BG581062 | BG645315 | BI941975 | AW395242 | BQ172540 | AW50696  |
| BG581062 | CF068254 | BI942377 | BQ740335 | BQ172540 | BE345195 |
| BG581109 | BE999049 | BI942385 | BI945349 | BQ172540 | BQ486806 |
| BG581109 | BG583270 | BI943065 | BI945349 | BQ172610 | BQ295647 |
| BG581110 | BE999432 | BI943096 | AW156245 | BQ172629 | AW50677  |
| BG581110 | CF069880 | BI944697 | BI893230 | BQ172694 | BE186125 |
| BG581141 | CA919905 | BI945251 | BI945349 | BQ172694 | BE186883 |
| BG581153 | BE941539 | BI945313 | AI960529 | BQ172696 | BU197477 |
| BG581153 | BG581972 | BI945313 | AW099382 | BQ172719 | AI734472 |
| BG581153 | CA919999 | BI945313 | AW458519 | BQ172719 | BE511591 |
| BG581212 | BE997521 | BI945313 | AW458928 | BQ279259 | BE511084 |
| BG581214 | AW774831 | BI945313 | BE023801 | BQ279276 | BU093453 |
| BG581215 | BG583270 | BI945313 | BG508263 | BQ279276 | BU102410 |
| BG581259 | BE999049 | BI945313 | BG511674 | BQ279347 | AI770434 |
| BG581293 | BG644861 | BI945313 | BI893467 | BQ279397 | AW06211  |
| BG581301 | AW574045 | BI945313 | BI893882 | BQ279400 | BE512477 |
| BG581301 | CF069222 | BI945313 | BI944651 | BQ279400 | CA452963 |
| BG581339 | BG647923 | BI945313 | BI944653 | BQ279400 | CA453100 |
| BG581339 | BG647965 | BI945313 | BI974694 | BQ279586 | BQ293528 |
| BG581392 | AW574045 | BI945313 | BI974815 | BQ279589 | BE639835 |
| BG581392 | CF069222 | BI945313 | BM092219 | BQ279589 | BU079556 |
| BG581426 | CA918296 | BI945313 | BM187665 | BQ279633 | BQ547745 |
| BG581437 | BG644861 | BI945313 | BM188356 | BQ279634 | BQ547745 |
| BG581438 | BG644861 | BI945313 | BM886487 | BQ279636 | BE509969 |
| BG581450 | BE999049 | BI945313 | BM891739 | BQ279940 | AW17206  |
| BG581461 | BE999163 | BI945313 | BQ630522 | BQ279973 | BE345490 |
| BG581543 | BG582691 | BI945313 | BU082554 | BQ279973 | BE345491 |
| BG581592 | BE942250 | BI945313 | BU577094 | BQ279973 | BQ294090 |
| BG581592 | BF006391 | BI945313 | BU577423 | BQ279973 | BQ294091 |
| BG581624 | AW208216 | BI945313 | BU578848 | BQ279973 | BQ486631 |
| BG581624 | AW573766 | BI945313 | BU762322 | BQ279973 | BU079820 |
| BG581624 | AW574033 | BI945313 | BU766041 | BQ279974 | AW56622  |
| BG581624 | AW777097 | BI945334 | BG509972 | BQ279974 | BE224945 |
| BG581624 | AW980714 | BI945347 | AW423722 | BQ279974 | BE345490 |
| BG581624 | BE997726 | BI945347 | BI945349 | BQ279974 | BE345491 |
| BG581624 | BG580193 | BI945480 | BQ080968 | BQ279974 | BQ486631 |
| BG581624 | BG580643 | BI945710 | CX708827 | BQ279974 | BU037952 |
| BG581624 | BG581986 | BI945759 | AW423722 | BQ279974 | BU079820 |
| BG581624 | BG583346 | BI945764 | BI945349 | BQ279974 | BU499958 |
| BG581648 | BG582691 | BI946084 | BI893230 | BQ280069 | BU037107 |
| BG581681 | BE998373 | BI946264 | BI945349 | BQ280077 | BE186417 |
| BG581689 | BE997521 | BI971608 | BQ741699 | BQ280077 | BU093453 |
| BG581742 | BE999049 | BI971636 | CX708990 | BQ280077 | BU102410 |
| BG581743 | BE999049 | BI971687 | BG551159 | BQ280144 | AW06211  |
| BG581754 | AW560413 | BI971768 | BQ740727 | BQ293556 | BE552830 |
| BG581754 | CA921114 | BI971802 | BI974664 | BQ293559 | AI902021 |

|          |          |          |          |          |          |
|----------|----------|----------|----------|----------|----------|
| BG581760 | CB892307 | BI971834 | BG362912 | BQ293649 | BQ034560 |
| BG581764 | AW573766 | BI971910 | AW432569 | BQ293649 | CA408781 |
| BG581764 | AW980562 | BI971910 | BG550884 | BQ293663 | AW52021  |
| BG581764 | BG581100 | BI971910 | BM177199 | BQ293663 | AW56613  |
| BG581764 | BG581527 | BI971910 | BM177201 | BQ293688 | BE344755 |
| BG581764 | BG581751 | BI971910 | BM187627 | BQ293770 | BE345611 |
| BG581764 | BG582170 | BI971910 | BQ740456 | BQ293770 | BE510049 |
| BG581764 | BG582172 | BI971910 | BQ740499 | BQ293770 | BQ667840 |
| BG581764 | BG583535 | BI971910 | BQ742495 | BQ293797 | AI834722 |
| BG581766 | DW018921 | BI971910 | BQ742656 | BQ293822 | BE509993 |
| BG581774 | BE124632 | BI971910 | BQ742960 | BQ293829 | BQ279550 |
| BG581797 | BG582951 | BI971910 | BQ743098 | BQ293829 | BQ779227 |
| BG581804 | AW980882 | BI971910 | BQ785234 | BQ293851 | AW35258  |
| BG581869 | BE997932 | BI971910 | BQ785436 | BQ293851 | AW50662  |
| BG581916 | BG582951 | BI971910 | BQ785612 | BQ293851 | BE640205 |
| BG581975 | BI309709 | BI971910 | BQ785672 | BQ293851 | BQ279735 |
| BG581994 | AW574045 | BI971910 | BQ785674 | BQ293851 | BQ401189 |
| BG581994 | CF069222 | BI971910 | BQ786243 | BQ293851 | BQ668271 |
| BG582045 | DW018921 | BI971910 | BQ786315 | BQ293851 | BQ744780 |
| BG582065 | BF003550 | BI971910 | BQ786662 | BQ293851 | BQ778999 |
| BG582073 | BE999432 | BI971910 | BU577039 | BQ293851 | BU037622 |
| BG582073 | CF069880 | BI971910 | BU762186 | BQ293851 | BU079797 |
| BG582081 | BE999049 | BI971910 | BU762350 | BQ293851 | BU092380 |
| BG582101 | BE997932 | BI971910 | CX711839 | BQ293894 | BQ034560 |
| BG582108 | BG582777 | BI971929 | AW156460 | BQ293960 | BE511084 |
| BG582108 | BG582881 | BI971929 | AW432569 | BQ293994 | BQ034560 |
| BG582108 | BQ255428 | BI971929 | BG550884 | BQ294048 | BU499510 |
| BG582116 | BG581935 | BI971929 | BM177199 | BQ294051 | BU645170 |
| BG582150 | BG582881 | BI971929 | BM177201 | BQ294156 | BU499738 |
| BG582150 | BQ255428 | BI971929 | BM187627 | BQ294157 | BU197477 |
| BG582212 | AW127197 | BI971929 | BQ740456 | BQ294157 | BU499738 |
| BG582228 | AW560398 | BI971929 | BQ740499 | BQ294158 | BQ034590 |
| BG582228 | BG581833 | BI971929 | BQ742339 | BQ294158 | BQ034698 |
| BG582228 | CA920019 | BI971929 | BQ742495 | BQ294158 | BQ048174 |
| BG582257 | AW981096 | BI971929 | BQ742656 | BQ294158 | BQ048206 |
| BG582257 | BG582691 | BI971929 | BQ742960 | BQ294159 | BQ034155 |
| BG582282 | BE999252 | BI971929 | BQ785234 | BQ294159 | BQ048174 |
| BG582295 | AW208238 | BI971929 | BQ785436 | BQ294159 | BQ048206 |
| BG582304 | AW127197 | BI971929 | BQ785672 | BQ294174 | AI820373 |
| BG582306 | BE997521 | BI971929 | BQ785674 | BQ294190 | BE510425 |
| BG582308 | BG647923 | BI971929 | BQ786243 | BQ294191 | BE510425 |
| BG582343 | BE998732 | BI971929 | BQ786315 | BQ294330 | BU197944 |
| BG582364 | BG582777 | BI971929 | BQ786662 | BQ294376 | AI939812 |
| BG582364 | BG582881 | BI971929 | BU577039 | BQ294376 | BE510036 |
| BG582376 | BE187599 | BI971929 | BU577677 | BQ294422 | BE453837 |
| BG582381 | CB892307 | BI971929 | BU578728 | BQ295536 | AI770701 |
| BG582417 | AW736185 | BI971929 | BU762186 | BQ295605 | BQ293528 |
| BG582439 | BE999252 | BI971929 | BU762350 | BQ295646 | AI820187 |
| BG582448 | BG582691 | BI971929 | CX711839 | BQ295689 | BE510370 |
| BG582460 | BG583270 | BI972001 | BQ741738 | BQ295748 | BE345532 |
| BG582538 | AW774575 | BI972027 | BQ080968 | BQ295777 | BE575223 |
| BG582541 | BE202522 | BI972257 | BG362847 | BQ295779 | BE186873 |

|          |          |          |          |          |          |
|----------|----------|----------|----------|----------|----------|
| BG582558 | AW127219 | BI972257 | BQ081577 | BQ295779 | BE510164 |
| BG582565 | BE997521 | BI972258 | AW733831 | BQ295786 | BE575223 |
| BG582567 | BE997932 | BI973084 | AW099381 | BQ401083 | BU037107 |
| BG582586 | BE999376 | BI973098 | BQ741738 | BQ401085 | AI820187 |
| BG582586 | BQ750668 | BI974547 | BM886942 | BQ401142 | AI737079 |
| BG582586 | CA920261 | BI974547 | BM887039 | BQ401162 | BU500097 |
| BG582615 | AW574045 | BI974607 | BG362912 | BQ401192 | BE575223 |
| BG582629 | BE997521 | BI974648 | BE554991 | BQ401194 | BQ295647 |
| BG582650 | BI309594 | BI974685 | BQ786025 | BQ486619 | BE575223 |
| BG582709 | AW127224 | BI974728 | BM890983 | BQ486629 | BU036669 |
| BG582709 | BE124480 | BI974732 | BF325325 | BQ486643 | AI740007 |
| BG582709 | BE998671 | BI974778 | AW306520 | BQ486700 | BQ034560 |
| BG582709 | BE998950 | BI974941 | BM887525 | BQ486700 | CA408781 |
| BG582709 | BE999887 | BI975057 | BI972113 | BQ486745 | AI833357 |
| BG582709 | BG581483 | BM091666 | CX705907 | BQ486745 | BE224787 |
| BG582767 | BG646447 | BM091752 | CX547614 | BQ486745 | BE238812 |
| BG582794 | CB892307 | BM091752 | CX706524 | BQ486745 | BQ034769 |
| BG582802 | BE999252 | BM091943 | AW119915 | BQ486808 | AW49806  |
| BG582814 | BG580427 | BM091986 | CX710382 | BQ486952 | BE510370 |
| BG582834 | AW574045 | BM091998 | BQ629760 | BQ486979 | BE510370 |
| BG582834 | CF069222 | BM092084 | BE556096 | BQ486983 | BU499889 |
| BG582879 | BG582951 | BM092125 | CX705907 | BQ487022 | AW17204  |
| BG582903 | BE997521 | BM092125 | CX709098 | BQ487040 | AI676985 |
| BG582910 | BE999049 | BM092152 | AW733831 | BQ487040 | AI712242 |
| BG582910 | BG583270 | BM092241 | BQ629943 | BQ487040 | AI745883 |
| BG582926 | CB892307 | BM092399 | BQ612063 | BQ487040 | AI833357 |
| BG582938 | BE999252 | BM092583 | BQ627664 | BQ487040 | BE224787 |
| BG582940 | AW127197 | BM092748 | BG509972 | BQ487040 | BE344631 |
| BG582969 | CA922985 | BM092757 | AI930835 | BQ487040 | BM41683  |
| BG582969 | CA923036 | BM092757 | AW317108 | BQ487040 | BQ034246 |
| BG582973 | BE999252 | BM092757 | BF596310 | BQ487040 | BQ048399 |
| BG583037 | CA919782 | BM092757 | BG510041 | BQ487040 | BQ293902 |
| BG583070 | BE999252 | BM092757 | BI971749 | BQ487040 | BU098341 |
| BG583080 | AW981096 | BM092757 | BQ080727 | BQ487040 | BU101404 |
| BG583081 | BE999049 | BM092757 | BQ629595 | BQ487040 | BU101405 |
| BG583126 | BE999432 | BM092757 | BU578086 | BQ487068 | AW26759  |
| BG583126 | CF069880 | BM092757 | CX706803 | BQ487068 | BE345611 |
| BG583134 | CA919905 | BM092757 | CX707741 | BQ487149 | BQ547762 |
| BG583160 | BE999820 | BM092757 | CX707894 | BQ527908 | BE575223 |
| BG583180 | BG581691 | BM092757 | CX710403 | BQ527941 | AI739904 |
| BG583192 | CA923087 | BM092776 | BE022507 | BQ527941 | AI901773 |
| BG583210 | BG582210 | BM092776 | CX703670 | BQ527941 | AI939769 |
| BG583229 | AW775795 | BM093869 | BE190933 | BQ527941 | AW26753  |
| BG583229 | CA916918 | BM176889 | BQ081306 | BQ527941 | BE345508 |
| BG583247 | AW208238 | BM176905 | BQ628008 | BQ527941 | BQ169290 |
| BG583283 | AW573612 | BM176905 | BQ740638 | BQ527941 | BQ744757 |
| BG583283 | AW777094 | BM176905 | BQ786625 | BQ527941 | BU098480 |
| BG583283 | AW980582 | BM176974 | CF921666 | BQ527957 | AI676985 |
| BG583283 | BE998599 | BM176989 | AI965604 | BQ527957 | AI833357 |
| BG583283 | BG582018 | BM177012 | CX705592 | BQ527957 | BE129723 |
| BG583283 | BG582937 | BM177012 | CX705812 | BQ527957 | BE224787 |
| BG583283 | BQ164960 | BM177039 | BG511227 | BQ527957 | BE344631 |

|          |          |          |          |          |          |
|----------|----------|----------|----------|----------|----------|
| BG583283 | CA919782 | BM177047 | BG511227 | BQ527957 | BM41683  |
| BG583301 | BG582951 | BM177057 | CX706470 | BQ527957 | BQ034769 |
| BG583305 | CA919782 | BM177092 | BG511227 | BQ527957 | BQ048399 |
| BG583328 | DW018921 | BM177156 | BG511227 | BQ527957 | BQ293902 |
| BG583411 | BG581204 | BM177165 | BE329892 | BQ527957 | BU098341 |
| BG583411 | BG581435 | BM177165 | BM887280 | BQ527957 | BU101404 |
| BG583418 | BE998373 | BM177171 | AI938647 | BQ527957 | BU101405 |
| BG583448 | BE999432 | BM177183 | BG511227 | BQ527968 | AW31314  |
| BG583448 | CF069880 | BM177215 | AW432569 | BQ527991 | BE344670 |
| BG583509 | BI311737 | BM177215 | BG550884 | BQ527991 | BE345073 |
| BG583509 | CF068746 | BM177215 | BI423809 | BQ528089 | BE511084 |
| BG583539 | BG646316 | BM177215 | BM177199 | BQ528099 | BU197452 |
| BG583545 | CB892307 | BM177215 | BM187627 | BQ528230 | BQ539600 |
| BG583584 | CB892307 | BM177215 | BM188328 | BQ529212 | BU093189 |
| BG583599 | AW980748 | BM177215 | BQ079522 | BQ539629 | AI855043 |
| BG583599 | BG580164 | BM177215 | BQ740456 | BQ539629 | BQ294055 |
| BG583599 | CF069302 | BM177215 | BQ786243 | BQ539629 | BQ744601 |
| BG583610 | BE999049 | BM177215 | BU577039 | BQ539629 | BU101442 |
| BG583631 | AW574045 | BM177215 | BU762186 | BQ539637 | BE511084 |
| BG583631 | CF069222 | BM177215 | BU762350 | BQ539652 | BQ703811 |
| BG583645 | BG581305 | BM177215 | CX711839 | BQ539688 | CA452893 |
| BG583645 | BG582986 | BM177221 | BG511227 | BQ547632 | BU499813 |
| BG583650 | AI974751 | BM177223 | BG511227 | BQ547650 | BE575223 |
| BG583660 | CB892307 | BM177227 | BG511227 | BQ547660 | AI677485 |
| BG583683 | CA918296 | BM177234 | CX706276 | BQ547660 | BE553146 |
| BG583699 | AW574045 | BM177261 | BG511227 | BQ547712 | BE475706 |
| BG583723 | BQ164760 | BM177268 | BG511227 | BQ547714 | AI740007 |
| BG583723 | CA917182 | BM177293 | BG511227 | BQ547714 | AI820187 |
| BG583749 | BG644861 | BM177298 | BQ611973 | BQ547722 | BU098084 |
| BG583765 | BG583866 | BM177325 | BQ741420 | BQ547833 | BQ779067 |
| BG583882 | BG582777 | BM177326 | BM271227 | BQ547837 | BE575223 |
| BG583882 | BG582881 | BM177338 | BM188431 | BQ547843 | BU093636 |
| BG583882 | BQ255428 | BM177338 | BM188891 | BQ547869 | BU499813 |
| BG583885 | BE124148 | BM177338 | BU577623 | BQ547879 | AW16549  |
| BG583905 | CF069222 | BM177368 | BE330472 | BQ547879 | AW17200  |
| BG583910 | BG647965 | BM177368 | BM271199 | BQ547886 | BU499813 |
| BG587838 | CB893704 | BM177369 | BM271227 | BQ547903 | BE575223 |
| BG587874 | CB893352 | BM177388 | BG511227 | BQ547945 | AI820319 |
| BG587874 | DW018233 | BM177424 | BG511227 | BQ620931 | BU499510 |
| BG587874 | DW018920 | BM177429 | BG511227 | BQ621082 | AI734392 |
| BG588065 | CF069871 | BM177443 | BG511227 | BQ621086 | BQ293816 |
| BG588067 | BE124179 | BM177444 | CX547709 | BQ621086 | CA408823 |
| BG588201 | CB891322 | BM177462 | BE330064 | BQ621086 | CA452963 |
| BG588272 | BG646447 | BM177465 | BG511227 | BQ621086 | CA453100 |
| BG588390 | BM779965 | BM177469 | BG511227 | BQ621120 | AI714813 |
| BG588541 | BI309594 | BM177471 | AW432569 | BQ621120 | AW50685  |
| BG588564 | BG582366 | BM177471 | BG550884 | BQ621120 | AW50685  |
| BG588569 | BG588464 | BM177471 | BI321421 | BQ621177 | BQ295673 |
| BG588597 | AI974676 | BM177471 | BM177199 | BQ621229 | AI712242 |
| BG588597 | BE202759 | BM177471 | BM177230 | BQ621229 | AI745883 |
| BG588597 | BE239777 | BM177471 | BM187627 | BQ621229 | BE224787 |
| BG588661 | BG588464 | BM177471 | BM188328 | BQ621229 | BE344631 |

|          |          |          |          |          |          |
|----------|----------|----------|----------|----------|----------|
| BG588687 | CA990941 | BM177471 | BQ740456 | BQ621229 | BQ048399 |
| BG588692 | BG644861 | BM177471 | BQ740499 | BQ621229 | BQ293902 |
| BG588715 | BG588464 | BM177471 | BQ742339 | BQ621229 | BU098341 |
| BG588736 | BG588488 | BM177471 | BQ742656 | BQ621229 | BU101404 |
| BG588830 | BE240516 | BM177471 | BQ742960 | BQ621229 | BU101405 |
| BG588863 | BI310066 | BM177471 | BQ743098 | BQ621283 | BU036840 |
| BG588949 | BI308546 | BM177471 | BQ785612 | BQ635455 | AI834722 |
| BG588952 | BG646316 | BM177471 | BQ785672 | BQ635507 | AI881850 |
| BG588989 | CF068052 | BM177471 | BQ785674 | BQ635507 | BQ048089 |
| BG589097 | BG588464 | BM177471 | BQ786243 | BQ635507 | BU572122 |
| BG604211 | CB892634 | BM177471 | BQ786392 | BQ635516 | BQ487090 |
| BG644429 | BG647965 | BM177471 | BQ786651 | BQ635516 | BU036840 |
| BG644457 | BG644861 | BM177471 | BU577039 | BQ635575 | AW17201  |
| BG644475 | BG647923 | BM177471 | BU578728 | BQ635682 | BU197452 |
| BG644491 | BG648695 | BM177471 | BU762186 | BQ635715 | BE511760 |
| BG644615 | BG647923 | BM177471 | BU762350 | BQ635715 | BQ048089 |
| BG644615 | BG647965 | BM177471 | CX711839 | BQ635715 | BU102426 |
| BG644636 | BM779990 | BM187573 | BE059572 | BQ635715 | BU572122 |
| BG644636 | BM780240 | BM187645 | BG511227 | BQ635715 | BU582134 |
| BG644641 | BG581691 | BM187651 | BG511227 | BQ635715 | BU582135 |
| BG644674 | BF005611 | BM187671 | AI938774 | BQ635817 | BE510370 |
| BG644949 | CA990868 | BM187671 | AW458432 | BQ635847 | BE575223 |
| BG644979 | BF520852 | BM187671 | AW733572 | BQ635848 | BE575223 |
| BG644979 | BM779951 | BM187671 | BE022682 | BQ667757 | AI734794 |
| BG644979 | BM780135 | BM187671 | BE023983 | BQ667757 | BE224917 |
| BG645015 | BM778950 | BM187671 | BG508252 | BQ667758 | AI734794 |
| BG645085 | BM779965 | BM187671 | BG511563 | BQ667789 | BE186417 |
| BG645222 | BG646268 | BM187671 | BG511564 | BQ667789 | BU093453 |
| BG645222 | BM779612 | BM187671 | BI941602 | BQ667789 | BU102410 |
| BG645222 | CB892446 | BM187671 | BM188486 | BQ667832 | BE644289 |
| BG645222 | CB892679 | BM187671 | BQ610578 | BQ667833 | BE644289 |
| BG645248 | BF003671 | BM187671 | BQ628644 | BQ667833 | BQ778688 |
| BG645327 | AW774665 | BM187671 | BQ628780 | BQ667879 | BQ778947 |
| BG645334 | AI737578 | BM187671 | BQ629625 | BQ668133 | BQ667854 |
| BG645369 | AW573642 | BM187673 | BG511227 | BQ668149 | AI834722 |
| BG645369 | AW774946 | BM187715 | BG511227 | BQ668226 | BQ295796 |
| BG645369 | BE204134 | BM187763 | BG511227 | BQ668246 | CA452893 |
| BG645369 | BF004205 | BM187845 | BG511227 | BQ668246 | CA452894 |
| BG645369 | BG581299 | BM187906 | BG511227 | BQ668247 | CA452893 |
| BG645369 | BG582833 | BM187975 | AI938365 | BQ668304 | AI834722 |
| BG645369 | BG644796 | BM187975 | AI965604 | BQ703263 | BQ744874 |
| BG645369 | BG649064 | BM187984 | AW432569 | BQ703715 | AI820339 |
| BG645369 | BI309652 | BM187984 | BG550884 | BQ703715 | BQ048264 |
| BG645389 | CA990776 | BM187984 | BI321421 | BQ703735 | BE511084 |
| BG645423 | CB891276 | BM187984 | BI423809 | BQ703759 | AI834722 |
| BG645498 | AW774243 | BM187984 | BM177199 | BQ703760 | BQ744776 |
| BG645498 | BM779691 | BM187984 | BM177230 | BQ703811 | BQ293803 |
| BG645565 | BM779043 | BM187984 | BM187627 | BQ703853 | BQ295569 |
| BG645565 | CB893398 | BM187984 | BM188328 | BQ703853 | BQ744776 |
| BG645572 | BG645940 | BM187984 | BQ079522 | BQ703871 | BU036877 |
| BG645572 | CB891527 | BM187984 | BQ740456 | BQ703889 | BQ833946 |
| BG645583 | AW774087 | BM187984 | BQ742339 | BQ703893 | BQ048218 |

|          |          |          |          |          |          |
|----------|----------|----------|----------|----------|----------|
| BG645583 | BM779218 | BM187984 | BQ785674 | BQ703893 | BU037473 |
| BG645607 | BG647923 | BM187984 | BQ786243 | BQ703913 | BE575223 |
| BG645607 | BG647965 | BM187984 | BQ786392 | BQ704064 | BQ164224 |
| BG645682 | BI309594 | BM187984 | BQ786651 | BQ704064 | BU093636 |
| BG645804 | AW559353 | BM187984 | BU577039 | BQ704064 | BU499862 |
| BG645804 | AW775898 | BM187984 | BU578728 | BQ704125 | BE511084 |
| BG645804 | DW018538 | BM187984 | BU762186 | BQ704154 | BE575223 |
| BG645869 | BF003310 | BM187984 | BU762350 | BQ744579 | AI834722 |
| BG645997 | BF003671 | BM187984 | CX711839 | BQ744736 | BU645233 |
| BG646044 | AW256662 | BM187989 | BU577359 | BQ744842 | BU079961 |
| BG646073 | BE124541 | BM187992 | BE191511 | BQ744927 | BQ295702 |
| BG646073 | CB895089 | BM188044 | BG511227 | BQ778863 | BE509969 |
| BG646089 | BI308546 | BM188105 | BI423809 | BQ778901 | BE575223 |
| BG646226 | CB893704 | BM188105 | BM177201 | BQ778903 | AI881845 |
| BG646303 | BE204888 | BM188105 | BM187627 | BQ778925 | AI820187 |
| BG646314 | BG646447 | BM188105 | BQ079522 | BQ778933 | BQ547810 |
| BG646341 | BG646924 | BM188105 | BQ740499 | BQ778933 | BQ778707 |
| BG646377 | AW256725 | BM188105 | BQ742495 | BQ778933 | BU093636 |
| BG646377 | BG648136 | BM188105 | BQ785234 | BQ778933 | BU098450 |
| BG646622 | BE124363 | BM188105 | BQ785436 | BQ778933 | BU499862 |
| BG646622 | BG581691 | BM188105 | BQ785674 | BQ778933 | CA409138 |
| BG646711 | BG646316 | BM188105 | BQ786315 | BQ778936 | BE345774 |
| BG646822 | BG646924 | BM188105 | BQ786662 | BQ778936 | BE345909 |
| BG646833 | BG647369 | BM188105 | BU577039 | BQ779013 | BE575223 |
| BG646842 | BE204173 | BM188105 | BU762350 | BQ779014 | BE575223 |
| BG646842 | BG582578 | BM188105 | CX711839 | BQ779015 | AW52028  |
| BG647184 | BG581329 | BM188113 | BU577357 | BQ779015 | AW56621  |
| BG647202 | BE998754 | BM188123 | BG511227 | BQ779019 | BE575223 |
| BG647226 | AW980341 | BM188160 | BG511227 | BQ779123 | BE345532 |
| BG647274 | BG647965 | BM188161 | AW733572 | BQ779123 | BQ294204 |
| BG647423 | CB891327 | BM188161 | BE023983 | BQ779123 | BU036877 |
| BG647431 | CA916808 | BM188161 | BE190877 | BQ779191 | BE509969 |
| BG647444 | BM779965 | BM188161 | BG508252 | BQ779337 | BE345774 |
| BG647572 | CB893467 | BM188161 | BM188486 | BQ779337 | BE345909 |
| BG647615 | CA991155 | BM188166 | BG511227 | BQ779338 | BE345774 |
| BG647657 | BG583249 | BM188180 | CF922816 | BQ779338 | BE345909 |
| BG647693 | BF003601 | BM188205 | BG511227 | BQ779344 | BU197477 |
| BG647707 | AW560409 | BM188226 | BG511227 | BQ779344 | BU499738 |
| BG647826 | BE204888 | BM188238 | BG511227 | BQ779447 | BE345532 |
| BG647834 | AW267866 | BM188246 | BG511227 | BQ779447 | BU036877 |
| BG647867 | BG648015 | BM188248 | BQ079383 | BQ779538 | AI712242 |
| BG647876 | CA991065 | BM188251 | BG511227 | BQ779538 | BE344631 |
| BG647942 | CB892920 | BM188255 | BU080759 | BQ779538 | BQ048399 |
| BG647952 | BG645373 | BM188261 | BU080759 | BQ779538 | BU098341 |
| BG647960 | BE205132 | BM188270 | BG511227 | BQ779538 | BU101404 |
| BG647960 | CB893033 | BM188287 | BQ785707 | BQ779538 | BU101405 |
| BG647973 | BG647923 | BM188317 | BQ740638 | BQ833751 | BQ279358 |
| BG647978 | AW256725 | BM188359 | BG511227 | BQ833770 | AI881845 |
| BG648135 | BF003601 | BM188368 | BQ786038 | BQ833940 | AI881550 |
| BG648244 | BG648565 | BM188383 | BG511227 | BQ833940 | BE238631 |
| BG648253 | DW018334 | BM188395 | BG511227 | BU036625 | AW56631  |
| BG648281 | BE202576 | BM188413 | BI787857 | BU036627 | AI834722 |



|          |          |          |          |          |          |
|----------|----------|----------|----------|----------|----------|
| BG648399 | BE998411 | BM188413 | BQ611271 | BU036642 | BU499813 |
| BG648399 | BE998958 | BM188418 | BE555632 | BU036643 | BU499813 |
| BG648399 | CF069923 | BM188418 | BM177466 | BU036836 | BE575223 |
| BG648435 | BG646937 | BM188418 | BQ740512 | BU036851 | BQ164224 |
| BG648435 | CB892904 | BM188447 | BE555632 | BU036851 | BQ547810 |
| BG648485 | BG648698 | BM188447 | BQ611271 | BU036851 | BQ778707 |
| BG648492 | BQ255130 | BM188447 | BQ786545 | BU036851 | BU093636 |
| BG648500 | BE124432 | BM188492 | BG511227 | BU036851 | BU499862 |
| BG648533 | BE124707 | BM188543 | BG511227 | BU036950 | AI834722 |
| BG648533 | BE205486 | BM188563 | BM887210 | BU037011 | BU037106 |
| BG648533 | BE239937 | BM188577 | AW396294 | BU037011 | BU037107 |
| BG648533 | BE997506 | BM188577 | BE329608 | BU037029 | BE186417 |
| BG648533 | BG648488 | BM188587 | CX712160 | BU037029 | BQ293584 |
| BG648556 | BG644861 | BM188612 | BM269598 | BU037029 | BU093453 |
| BG648613 | BG648909 | BM188612 | BM271205 | BU037029 | BU102410 |
| BG648759 | BE942250 | BM188612 | BU765110 | BU037084 | AI834722 |
| BG648759 | BI310793 | BM188624 | BI423783 | BU037126 | BE510370 |
| BG648823 | BG648909 | BM188624 | BI971582 | BU037136 | BQ486849 |
| BG648843 | BG646316 | BM188624 | BM954426 | BU037191 | BU571539 |
| BG648940 | BE998754 | BM188624 | BQ080941 | BU037207 | BE475661 |
| BG648982 | AW560420 | BM188624 | BQ081491 | BU037218 | BQ779290 |
| BG648987 | CB894351 | BM188624 | BQ628017 | BU037218 | BU036877 |
| BG649107 | CB892139 | BM188624 | BQ742495 | BU037419 | BQ778677 |
| BG649108 | BM779043 | BM188624 | BQ742656 | BU037419 | BU098553 |
| BG649108 | CB893398 | BM188624 | BQ742744 | BU037428 | BE518670 |
| BG649130 | AW299018 | BM188624 | BQ742891 | BU037480 | AI676985 |
| BI307867 | BQ165791 | BM188624 | BQ785105 | BU037480 | AI833357 |
| BI307901 | BG647965 | BM188624 | BQ785299 | BU037480 | BE224787 |
| BI307924 | AW559403 | BM188624 | BQ785393 | BU037480 | BM41683  |
| BI307954 | CB894483 | BM188624 | BQ785674 | BU037480 | BQ293902 |
| BI308009 | BI309524 | BM188624 | BQ786187 | BU037480 | BU098341 |
| BI308121 | BE943019 | BM188624 | BQ786225 | BU037480 | BU101404 |
| BI308210 | BG644861 | BM188631 | BG511227 | BU037480 | BU101405 |
| BI308223 | DW015114 | BM188641 | BM271205 | BU037509 | BE510370 |
| BI308309 | BI309622 | BM188641 | BU579219 | BU037557 | AI770579 |
| BI308512 | CB891994 | BM188641 | BU765110 | BU037594 | BQ778677 |
| BI308585 | BG647866 | BM188644 | BG511227 | BU037615 | BU500089 |
| BI308634 | BI308291 | BM188695 | BG511227 | BU037708 | BQ164224 |
| BI308641 | BG646133 | BM188765 | BG511227 | BU037708 | BQ547810 |
| BI308853 | BE240237 | BM188786 | BM954392 | BU037708 | BU093636 |
| BI308981 | BI308855 | BM188788 | BM271227 | BU037708 | BU499862 |
| BI308981 | BI309693 | BM188790 | BE023686 | BU037747 | AI881845 |
| BI308981 | BI310865 | BM188887 | BM188397 | BU037766 | AI665882 |
| BI308981 | CA916844 | BM188902 | BM954343 | BU037766 | AI833991 |
| BI309066 | BM780205 | BM188902 | BQ785640 | BU037776 | AW49806  |
| BI309104 | BQ164760 | BM188902 | BQ786444 | BU037867 | AI820187 |
| BI309160 | BG648846 | BM188910 | BG511227 | BU037923 | AI941584 |
| BI309195 | BG644861 | BM188915 | BG511227 | BU037949 | BU036799 |
| BI309224 | BE204445 | BM270911 | BE555374 | BU079484 | BU098325 |
| BI309224 | BF519542 | BM270911 | BQ786010 | BU079558 | BE186883 |
| BI309224 | BG580636 | BM270911 | CX709770 | BU079561 | BE345574 |
| BI309224 | BG646530 | BM270972 | AW423843 | BU079562 | BE345574 |

|          |          |          |          |          |          |
|----------|----------|----------|----------|----------|----------|
| BI309224 | BG648652 | BM270979 | BF068688 | BU079562 | BE553097 |
| BI309224 | BI308176 | BM271029 | BU080759 | BU079598 | BE575223 |
| BI309224 | CB895138 | BM271036 | BG511227 | BU079631 | BQ547762 |
| BI309246 | AW980896 | BM271039 | BG511227 | BU079657 | BU499510 |
| BI309246 | BF004004 | BM271071 | BG511227 | BU079831 | BU197808 |
| BI309300 | BG644861 | BM271098 | BG511227 | BU079913 | AI770579 |
| BI309311 | BG644861 | BM271105 | BE022682 | BU079935 | BQ294177 |
| BI309347 | BG644861 | BM271105 | BG508252 | BU079966 | BU098060 |
| BI309400 | BG648486 | BM271105 | BG511563 | BU079976 | BE345195 |
| BI309438 | BI309103 | BM271105 | BI941602 | BU079989 | BU499510 |
| BI309472 | BF005416 | BM271105 | BI941699 | BU080014 | BQ034560 |
| BI309472 | DW019157 | BM271105 | BQ610760 | BU080014 | CA408781 |
| BI309503 | BI307878 | BM271105 | BQ628644 | BU080074 | BE511084 |
| BI309529 | AW980936 | BM271105 | BQ629625 | BU080103 | AI670658 |
| BI309573 | AW127695 | BM271132 | BG511227 | BU080103 | BE344921 |
| BI309573 | BF006601 | BM271139 | BG511227 | BU080103 | BE509913 |
| BI309591 | BG645491 | BM271149 | BG511227 | BU080103 | BQ164247 |
| BI309596 | DW016049 | BM271177 | BG511227 | BU080103 | BU080222 |
| BI309684 | BI309747 | BM271242 | BG650372 | BU080103 | BU102404 |
| BI309694 | BI307878 | BM522459 | CX704211 | BU080141 | AW60052  |
| BI309700 | BI309152 | BM522477 | CX547102 | BU080146 | BU092699 |
| BI309715 | BG647923 | BM522555 | CX708559 | BU080168 | BQ034560 |
| BI309715 | BG647965 | BM522560 | AW153089 | BU080168 | CA408781 |
| BI309735 | BG647923 | BM522590 | CX710095 | BU080190 | BQ778677 |
| BI309735 | BG647965 | BM522725 | AW459711 | BU080190 | BU098553 |
| BI309772 | BF006471 | BM522725 | BE329862 | BU080231 | CA453074 |
| BI309772 | DW018560 | BM522725 | BQ627664 | BU080280 | BE575223 |
| BI309824 | CA921752 | BM522725 | BQ627676 | BU092353 | BE575223 |
| BI309911 | BI309833 | BM522725 | BQ785873 | BU092378 | BU098125 |
| BI309911 | BI311453 | BM522725 | CX548810 | BU092383 | BQ164224 |
| BI309920 | BI310609 | BM522725 | CX702356 | BU092383 | BQ547810 |
| BI309953 | BI310125 | BM522725 | CX712116 | BU092383 | BU093636 |
| BI309953 | BI310208 | BM522727 | BI426106 | BU092383 | BU499862 |
| BI309953 | BI310609 | BM522754 | BQ627664 | BU092549 | BE552941 |
| BI309953 | BI311144 | BM522813 | AW733432 | BU092560 | BE575223 |
| BI309953 | BI311559 | BM522814 | BQ786720 | BU092743 | AI881845 |
| BI309953 | BI311736 | BM522833 | BM954434 | BU092754 | AI881229 |
| BI309953 | BI311996 | BM522833 | BU578193 | BU092757 | BE510425 |
| BI309953 | CA990996 | BM522905 | AW432821 | BU092775 | BE511084 |
| BI309953 | CA991004 | BM523189 | CX707979 | BU092803 | BE552941 |
| BI309961 | BG647171 | BM523189 | CX711031 | BU092822 | AW49806  |
| BI310003 | BI309747 | BM523200 | BI320301 | BU092946 | BQ486879 |
| BI310003 | BI310125 | BM523200 | BM188053 | BU093043 | BQ279671 |
| BI310003 | BI310208 | BM523200 | BU578564 | BU093129 | BU037107 |
| BI310003 | BI310254 | BM523201 | CX704239 | BU093145 | BU197944 |
| BI310003 | BI310609 | BM523343 | CX711370 | BU093167 | BU093453 |
| BI310003 | BI311144 | BM523400 | BQ785634 | BU093167 | BU102410 |
| BI310003 | BI311465 | BM523715 | AW459691 | BU093171 | AI740007 |
| BI310003 | BI311559 | BM523747 | BE556463 | BU093176 | BU098084 |
| BI310003 | BI311736 | BM523796 | BQ612766 | BU093178 | BU499805 |
| BI310003 | BI312357 | BM567893 | BE330183 | BU093287 | BE575223 |
| BI310003 | CA917058 | BM567950 | BI787880 | BU093376 | BE575223 |

|          |          |          |          |          |          |
|----------|----------|----------|----------|----------|----------|
| BI310003 | CA990327 | BM567950 | BI893234 | BU093476 | BQ293816 |
| BI310003 | CA990382 | BM567950 | BQ740372 | BU093476 | BQ294082 |
| BI310003 | CA990637 | BM567986 | BI894034 | BU093476 | CA408823 |
| BI310003 | CA990996 | BM567986 | BM188846 | BU093476 | CA452963 |
| BI310003 | CA991004 | BM567986 | BQ613151 | BU093476 | CA453100 |
| BI310003 | CA991181 | BM567986 | BU080543 | BU093526 | BQ295796 |
| BI310003 | CA991244 | BM567986 | BU579284 | BU093536 | BU499510 |
| BI310003 | CA991307 | BM567986 | CX711687 | BU093553 | BE575223 |
| BI310003 | CA991364 | BM567997 | CX703442 | BU093568 | BQ779484 |
| BI310003 | CA991409 | BM568028 | BI972353 | BU093581 | AI740007 |
| BI310007 | BI309747 | BM886160 | BQ612340 | BU093702 | BE575223 |
| BI310007 | BI310125 | BM886166 | BM887269 | BU097876 | AI881845 |
| BI310007 | BI310254 | BM886179 | BF324070 | BU097890 | AI676985 |
| BI310007 | BI311465 | BM886179 | BF324550 | BU097890 | AI745883 |
| BI310007 | BI311559 | BM886179 | BF324577 | BU097890 | AI833357 |
| BI310007 | CA917058 | BM886179 | BF324928 | BU097890 | BE224787 |
| BI310007 | CA990382 | BM886179 | BF325307 | BU097890 | BE238812 |
| BI310007 | CA990996 | BM886179 | BF325487 | BU097890 | BE344631 |
| BI310007 | CA991244 | BM886179 | BF596325 | BU097890 | BU098341 |
| BI310007 | CA991307 | BM886179 | BI786857 | BU097890 | BU101404 |
| BI310008 | AW776059 | BM886179 | BI787048 | BU097896 | AI941584 |
| BI310008 | BE124077 | BM886179 | BI893096 | BU097980 | BE575223 |
| BI310008 | BF519000 | BM886179 | BI893449 | BU098021 | BQ778947 |
| BI310008 | BF519527 | BM886179 | BI893549 | BU098077 | BU499510 |
| BI310008 | BF521098 | BM886179 | BI894038 | BU098228 | BQ486879 |
| BI310013 | BI309747 | BM886179 | BI894115 | BU098266 | BU079961 |
| BI310013 | BI310208 | BM886179 | BI894159 | BU098266 | BU098919 |
| BI310013 | BI311465 | BM886179 | BI974923 | BU098298 | AI834722 |
| BI310013 | BI311559 | BM886179 | BM886436 | BU098304 | BE345532 |
| BI310013 | CA917058 | BM886179 | BM886526 | BU098304 | BU036877 |
| BI310013 | CA990327 | BM886179 | BM886604 | BU098326 | AI834722 |
| BI310013 | CA990382 | BM886179 | BM886626 | BU098334 | BE345611 |
| BI310013 | CA990637 | BM886179 | BM886921 | BU098334 | BE510049 |
| BI310013 | CA990996 | BM886179 | BM886939 | BU098334 | BE639720 |
| BI310013 | CA991181 | BM886179 | BM891018 | BU098334 | BQ667840 |
| BI310013 | CA991244 | BM886179 | BM891242 | BU098346 | BU079961 |
| BI310013 | CA991307 | BM886179 | BM891697 | BU098374 | BQ279358 |
| BI310013 | CA991364 | BM886184 | CX547832 | BU098389 | BU080447 |
| BI310013 | CA991409 | BM886208 | AI965776 | BU098463 | BE510370 |
| BI310053 | CA990573 | BM886245 | BG509972 | BU098468 | BE345772 |
| BI310131 | BI308265 | BM886282 | BM887525 | BU098469 | AI711716 |
| BI310131 | CB894351 | BM886330 | BQ629614 | BU098493 | BQ295647 |
| BI310144 | BI309747 | BM886330 | BQ741935 | BU098511 | BU499510 |
| BI310144 | BI310125 | BM886423 | BQ629395 | BU098532 | BU499813 |
| BI310144 | BI310208 | BM886495 | CX707541 | BU098540 | BQ778677 |
| BI310144 | BI310609 | BM886774 | BQ630417 | BU098540 | BU098553 |
| BI310144 | BI311144 | BM886837 | BQ627664 | BU098676 | BE510425 |
| BI310144 | BI311465 | BM886871 | BG727014 | BU098773 | BE511084 |
| BI310144 | BI311559 | BM887124 | BQ628599 | BU098869 | AI734726 |
| BI310144 | BI311736 | BM887168 | BE058274 | BU098869 | AI737305 |
| BI310144 | CA990149 | BM887273 | BQ785753 | BU098869 | AW05602  |
| BI310144 | CA990232 | BM887298 | BQ628249 | BU098869 | BU092512 |

|          |          |          |          |          |          |
|----------|----------|----------|----------|----------|----------|
| BI310144 | CA990382 | BM887352 | BM092354 | BU098869 | BU093633 |
| BI310144 | CA990637 | BM887363 | BG511227 | BU098869 | BU093741 |
| BI310144 | CA990794 | BM887370 | AW460210 | BU098869 | BU197902 |
| BI310144 | CA990996 | BM887399 | BG509972 | BU098869 | BU645273 |
| BI310144 | CA991004 | BM887442 | BQ629614 | BU098955 | AI746223 |
| BI310144 | CA991181 | BM887531 | BE329764 | BU098981 | AI770434 |
| BI310144 | CA991244 | BM887555 | BI941598 | BU098987 | BE575223 |
| BI310144 | CA991307 | BM887594 | BI974830 | BU098997 | BE575223 |
| BI310144 | CA991409 | BM890875 | BQ785753 | BU101303 | BQ833946 |
| BI310204 | BI309830 | BM890910 | AW733432 | BU101319 | AI834722 |
| BI310204 | CA990208 | BM890965 | CF921602 | BU101390 | BE575223 |
| BI310204 | CA991223 | BM890965 | CX708593 | BU101414 | BE186125 |
| BI310204 | CA991383 | BM890979 | BI787042 | BU101418 | AI770701 |
| BI310276 | BI311688 | BM891033 | BG509972 | BU101422 | BE639050 |
| BI310276 | CA990149 | BM891120 | BG511227 | BU102379 | AI737079 |
| BI310276 | CA990637 | BM891220 | BE058274 | BU102380 | BE552830 |
| BI310307 | BI309833 | BM891278 | BU765940 | BU102383 | AI902021 |
| BI310308 | BI311453 | BM891278 | CX706581 | BU102474 | AW52021  |
| BI310310 | BI311559 | BM891311 | BQ785382 | BU102474 | AW56613  |
| BI310310 | CA990637 | BM891358 | BI894056 | BU102489 | AI834722 |
| BI310310 | CA990996 | BM891405 | BG511227 | BU197404 | BU499738 |
| BI310310 | CA991181 | BM891421 | CX708840 | BU197405 | AI737079 |
| BI310310 | CA991307 | BM891506 | BM886582 | BU197410 | BU499474 |
| BI310326 | CA991223 | BM891579 | BM092202 | BU197410 | BU582324 |
| BI310333 | CA990860 | BM891602 | BQ785382 | BU197432 | BQ294396 |
| BI310345 | BI311529 | BM891602 | BU578671 | BU197432 | BU036877 |
| BI310374 | BG581691 | BM891602 | BU765091 | BU197458 | BQ279358 |
| BI310438 | BI309833 | BM891632 | CX711687 | BU197562 | BU079548 |
| BI310438 | BI311453 | BM891754 | BM177023 | BU197586 | BU098084 |
| BI310488 | BI310609 | BM891798 | BG511227 | BU197676 | BE511084 |
| BI310488 | BI311559 | BM954343 | BI972113 | BU197681 | AW17948  |
| BI310488 | BI311736 | BM954382 | AW306298 | BU197780 | AI834722 |
| BI310488 | CA990794 | BM954418 | BQ628285 | BU197818 | BU036877 |
| BI310494 | BI310319 | BM954509 | BI787854 | BU197877 | AI834722 |
| BI310494 | BI310767 | BM954567 | BQ785382 | BU197878 | BQ294381 |
| BI310494 | BI310982 | BM954567 | BU578671 | BU197882 | BE639835 |
| BI310494 | CA990064 | BM954567 | BU765091 | BU197882 | BU079556 |
| BI310494 | CA990895 | BM954624 | CX702150 | BU197905 | AI668385 |
| BI310494 | CA991223 | BM954624 | CX702392 | BU197905 | AI739942 |
| BI310510 | BI309830 | BM954641 | BQ629545 | BU197905 | AW26759  |
| BI310743 | BF003550 | BM954715 | AI965540 | BU197905 | BE345611 |
| BI310744 | BF003550 | BQ079402 | BM954514 | BU197905 | BE510049 |
| BI310771 | CA918389 | BQ079505 | BQ628008 | BU197905 | BE639720 |
| BI310771 | CA990208 | BQ079570 | BQ741853 | BU197905 | BQ667840 |
| BI310771 | CA990573 | BQ079574 | AI965662 | BU197905 | BQ779399 |
| BI310771 | CA990895 | BQ079615 | BG362912 | BU197905 | BQ779400 |
| BI310845 | BI309747 | BQ079644 | BQ628008 | BU197906 | BE345611 |
| BI310845 | BI310125 | BQ079858 | BM954514 | BU197906 | BE510049 |
| BI310845 | BI310208 | BQ079858 | BQ629524 | BU197906 | BE639720 |
| BI310845 | BI310609 | BQ079898 | BQ079388 | BU197906 | BQ667840 |
| BI310845 | BI311144 | BQ079929 | BQ080968 | BU197925 | AI745883 |
| BI310845 | BI311465 | BQ080299 | AW458925 | BU197925 | AI759016 |

|          |          |          |          |          |          |
|----------|----------|----------|----------|----------|----------|
| BI310845 | BI311559 | BQ080337 | AI930856 | BU197925 | BE129723 |
| BI310845 | BI311736 | BQ080337 | AW459133 | BU197925 | BE224787 |
| BI310845 | BI311996 | BQ080348 | BQ740824 | BU197925 | BE238812 |
| BI310845 | CA990232 | BQ080408 | BE554991 | BU197925 | BQ034769 |
| BI310845 | CA990794 | BQ080431 | BQ740824 | BU197925 | BU080367 |
| BI310845 | CA990996 | BQ080445 | CX702101 | BU197925 | BU098341 |
| BI310845 | CA991004 | BQ080445 | CX702336 | BU197925 | BU101404 |
| BI310845 | CA991307 | BQ080478 | CX548535 | BU197926 | AI676985 |
| BI310845 | CA991409 | BQ080619 | BQ741738 | BU197926 | AI745883 |
| BI310873 | BI309833 | BQ080622 | CX705848 | BU197926 | AI833357 |
| BI310873 | BI311453 | BQ080624 | BE554991 | BU197926 | BE224787 |
| BI310962 | BG582569 | BQ080639 | BQ627925 | BU197926 | BE238812 |
| BI310973 | BI310125 | BQ080729 | AW423580 | BU197926 | BE344631 |
| BI310973 | BI310208 | BQ080832 | BI972247 | BU197926 | BM41683  |
| BI310973 | BI310609 | BQ080832 | BI972272 | BU197926 | BQ034246 |
| BI310973 | BI311144 | BQ080832 | BQ079932 | BU197926 | BQ034769 |
| BI310973 | BI311559 | BQ080832 | BQ080397 | BU197926 | BQ293902 |
| BI310973 | BI311736 | BQ080832 | BQ081515 | BU197926 | BU080367 |
| BI310973 | BI311996 | BQ080832 | BQ741138 | BU197926 | BU098341 |
| BI310973 | CA990996 | BQ080832 | BQ742197 | BU197926 | BU101404 |
| BI311078 | BE998958 | BQ080832 | BU080809 | BU197926 | BU101405 |
| BI311186 | BI309747 | BQ080832 | CF922572 | BU197932 | BQ295555 |
| BI311186 | BI310208 | BQ080832 | CX711053 | BU197949 | BE575223 |
| BI311186 | BI311465 | BQ080873 | BM092091 | BU498815 | BU037889 |
| BI311186 | CA917058 | BQ080873 | BQ741322 | BU498837 | BQ279671 |
| BI311186 | CA990327 | BQ080873 | BQ742175 | BU498844 | BQ293528 |
| BI311186 | CA990382 | BQ080889 | BE191229 | BU498855 | BE639142 |
| BI311186 | CA991181 | BQ080889 | BQ628285 | BU498985 | AI737079 |
| BI311186 | CA991364 | BQ080983 | AW396108 | BU499002 | AI834722 |
| BI311186 | CA991409 | BQ080983 | AW733572 | BU499003 | AI834722 |
| BI311209 | BI310663 | BQ080983 | BE022682 | BU499018 | BQ034560 |
| BI311226 | BF519192 | BQ080983 | BE023983 | BU499067 | BE510370 |
| BI311226 | BI311727 | BQ080983 | BE190877 | BU499342 | BQ164224 |
| BI311226 | DW016001 | BQ080983 | BG508252 | BU499342 | BQ547810 |
| BI311244 | CA989963 | BQ080983 | BG508395 | BU499342 | BQ778707 |
| BI311268 | BG646316 | BQ080983 | BG511563 | BU499342 | BU093636 |
| BI311298 | CA990573 | BQ080983 | BI941699 | BU499342 | BU098450 |
| BI311385 | BI310089 | BQ080983 | BM567940 | BU499342 | BU499862 |
| BI311385 | BI310291 | BQ080983 | BQ298597 | BU499342 | CA409138 |
| BI311385 | CF068840 | BQ080983 | BQ629625 | BU499428 | BE575223 |
| BI311423 | BI309741 | BQ081121 | BE554886 | BU499615 | BQ164224 |
| BI311423 | BI309830 | BQ081121 | BI893320 | BU499615 | BQ547810 |
| BI311423 | BI310255 | BQ081121 | BQ081764 | BU499615 | BU093636 |
| BI311423 | BI310366 | BQ081121 | BQ630363 | BU499719 | AI881845 |
| BI311423 | BI310481 | BQ081121 | BQ741081 | BU499723 | BQ547810 |
| BI311423 | BI310536 | BQ081121 | BQ741140 | BU499723 | BQ778707 |
| BI311423 | BI310576 | BQ081121 | BQ741406 | BU499723 | BU093636 |
| BI311423 | BI310767 | BQ081121 | BQ785360 | BU499723 | BU098450 |
| BI311423 | BI310982 | BQ081121 | BU082799 | BU499723 | BU499862 |
| BI311423 | BI311015 | BQ081121 | BU082892 | BU499723 | CA409138 |
| BI311423 | BI311103 | BQ081138 | BU577810 | BU499732 | AI665534 |
| BI311423 | BI311399 | BQ081141 | BQ785382 | BU499732 | AI820168 |

|          |          |          |          |          |          |
|----------|----------|----------|----------|----------|----------|
| BI311423 | BI311434 | BQ081141 | BU578671 | BU499732 | AI833370 |
| BI311423 | BI311479 | BQ081141 | BU765091 | BU499732 | AI833853 |
| BI311423 | BI311754 | BQ081334 | BI426106 | BU499732 | AI901732 |
| BI311423 | BI311891 | BQ081382 | AW733831 | BU499732 | AI932156 |
| BI311423 | BI311962 | BQ081400 | BM188336 | BU499732 | AW16552  |
| BI311423 | BI312061 | BQ081461 | BQ740824 | BU499732 | AW26758  |
| BI311423 | BI312181 | BQ081498 | BM954368 | BU499732 | BE186873 |
| BI311423 | BI312246 | BQ081551 | CX702225 | BU499732 | BE225182 |
| BI311423 | BI312372 | BQ081675 | BQ785382 | BU499732 | BE510164 |
| BI311423 | CA918389 | BQ081675 | BU765091 | BU499732 | BE512069 |
| BI311423 | CA918418 | BQ081699 | BF425401 | BU499732 | BE640278 |
| BI311423 | CA989914 | BQ081717 | CX702392 | BU499732 | BQ704044 |
| BI311423 | CA990011 | BQ081753 | BU579284 | BU499732 | BU037728 |
| BI311423 | CA990208 | BQ081764 | BQ741738 | BU499732 | BU037729 |
| BI311423 | CA990338 | BQ298141 | BE023686 | BU499761 | AI881845 |
| BI311423 | CA990477 | BQ298141 | BI426120 | BU499828 | BQ635591 |
| BI311423 | CA990492 | BQ298141 | BQ743119 | BU499935 | BU098084 |
| BI311423 | CA990573 | BQ298141 | BQ785797 | BU499973 | AI834722 |
| BI311423 | CA990850 | BQ298141 | BQ785860 | BU499974 | AI834722 |
| BI311423 | CA990860 | BQ298183 | BG511227 | BU500063 | BE575223 |
| BI311423 | CA990895 | BQ298192 | AW394825 | BU500077 | AI834722 |
| BI311423 | CA990988 | BQ298192 | BG650263 | BU500094 | BQ778677 |
| BI311423 | CA991090 | BQ298248 | BU080766 | BU500094 | BU098553 |
| BI311423 | CA991117 | BQ298425 | CX706655 | BU571562 | AW17202  |
| BI311423 | CA991287 | BQ298700 | BG352717 | BU571584 | AW49806  |
| BI311462 | AW775870 | BQ298702 | BE022560 | BU571599 | BU571533 |
| BI311506 | CA991003 | BQ298959 | CX548108 | BU571668 | BE575223 |
| BI311526 | BI309833 | BQ298959 | CX705942 | BU571702 | AI834722 |
| BI311562 | BI309833 | BQ298959 | CX709054 | BU571759 | BQ547810 |
| BI311562 | BI311453 | BQ298976 | BE023686 | BU571759 | BQ778707 |
| BI311583 | BG583249 | BQ298976 | BI426120 | BU571759 | BU093636 |
| BI311617 | CA990573 | BQ298976 | BQ743119 | BU571759 | BU499862 |
| BI311626 | CF068834 | BQ298976 | BQ785797 | BU571795 | AI834722 |
| BI311655 | BI310319 | BQ298976 | BQ785860 | BU571804 | BQ635591 |
| BI311655 | BI310536 | BQ610024 | AI960213 | BU571944 | BE575223 |
| BI311655 | BI310767 | BQ610024 | BQ080795 | BU571980 | AW06166  |
| BI311655 | BI310982 | BQ610114 | AW396394 | BU572004 | BE186873 |
| BI311655 | CA990064 | BQ610114 | CX707048 | BU572033 | BE575223 |
| BI311655 | CA990895 | BQ610118 | CX548108 | BU572035 | BU197452 |
| BI311835 | BI310366 | BQ610118 | CX705942 | BU572044 | AW26733  |
| BI311835 | BI311479 | BQ610183 | AW733435 | BU572181 | BQ528238 |
| BI311835 | BI311652 | BQ610223 | BF066879 | BU572181 | BQ744640 |
| BI311835 | BI312372 | BQ610225 | BU765091 | BU572243 | BQ279648 |
| BI311835 | CA990492 | BQ610259 | BQ740566 | BU572285 | BE510425 |
| BI311835 | CA990573 | BQ610385 | BQ785382 | BU582031 | AI941584 |
| BI311835 | CA991090 | BQ610597 | BQ613010 | BU582055 | AI795324 |
| BI311835 | CA991287 | BQ610604 | BE330431 | BU582212 | AI734392 |
| BI311897 | BI310125 | BQ610711 | BQ611047 | BU582212 | AI901327 |
| BI311897 | BI310208 | BQ610712 | BQ611595 | BU582238 | BE575223 |
| BI311897 | BI310609 | BQ610712 | CX548108 | BU645146 | AI834722 |
| BI311897 | BI311144 | BQ610712 | CX705942 | BU645182 | BU079961 |
| BI311897 | BI311559 | BQ610712 | CX709054 | BU645197 | BQ164224 |

|          |          |          |          |                |          |
|----------|----------|----------|----------|----------------|----------|
| BI311897 | BI311736 | BQ610830 | BQ629213 | BU645197       | BQ547810 |
| BI311897 | CA990149 | BQ610865 | BQ612595 | BU645197       | BQ778707 |
| BI311897 | CA990382 | BQ611071 | AW099370 | BU645197       | BU093636 |
| BI311897 | CA990637 | BQ611071 | BE211730 | BU645197       | BU499862 |
| BI311897 | CA990996 | BQ611074 | CF922575 | BU645207       | AI833399 |
| BI311897 | CA991004 | BQ611157 | CX705482 | BU645274       | AI881845 |
| BI311897 | CA991181 | BQ611207 | CF922951 | BU645336       | BE575223 |
| BI311897 | CA991244 | BQ611297 | CX706615 | BU645366       | BQ048083 |
| BI311897 | CA991307 | BQ611450 | BM187646 | BU645384       | AW52021  |
| BI311897 | CA991409 | BQ611455 | BQ786706 | BU645384       | AW56613  |
| BI311921 | AW775434 | BQ611559 | BQ612063 | CA408381       | AW05592  |
| BI311921 | AW775693 | BQ611572 | CX702392 | CA408989       | BE553097 |
| BI311921 | BE124077 | BQ611606 | BG363079 | CA452955       | BE553097 |
| BI311921 | BF005365 | BQ611669 | AW458923 | <i>Hordeum</i> | barke    |
| BI311921 | BF518470 | BQ611669 | BQ079551 | EST1           | EST2     |
| BI311921 | BF518869 | BQ611669 | BU577598 | AL450619       | BE421949 |
| BI311921 | BF519000 | BQ611669 | BU577879 | AL450644       | BQ664607 |
| BI311921 | BF519527 | BQ611669 | CX546969 | AL450740       | AL508104 |
| BI311921 | BF520943 | BQ611669 | CX548351 | AL450768       | AL507313 |
| BI311921 | BF521012 | BQ611742 | CX707979 | AL499791       | CA032606 |
| BI311921 | DW016742 | BQ611773 | AW317242 | AL499913       | CB858378 |
| BI311921 | DW019162 | BQ611784 | BM567853 | AL500139       | CA016838 |
| BI311937 | BI309747 | BQ611951 | BQ629213 | AL500139       | CB878369 |
| BI311937 | BI310208 | BQ611951 | BQ629336 | AL500183       | AL502737 |
| BI311937 | BI310609 | BQ611973 | CX703713 | AL500374       | CA002571 |
| BI311937 | BI311465 | BQ611974 | BQ630192 | AL500595       | CA011159 |
| BI311937 | CA917058 | BQ611974 | CX705606 | AL500795       | AL501419 |
| BI311937 | CA990232 | BQ611974 | CX708933 | AL500795       | CB876133 |
| BI311937 | CA990327 | BQ611974 | CX709159 | AL500853       | CA009015 |
| BI311937 | CA990794 | BQ611996 | CX548177 | AL501240       | CA010817 |
| BI311937 | CA991307 | BQ612302 | CX702392 | AL501256       | CA028099 |
| BI311937 | CA991364 | BQ612514 | CX708889 | AL502247       | BQ459770 |
| BI311942 | BI310019 | BQ612514 | CX709201 | AL502247       | BQ657500 |
| BI311975 | BI309747 | BQ612561 | AW458052 | AL502289       | BQ657500 |
| BI311975 | BI310125 | BQ612735 | BE555632 | AL502875       | BU997237 |
| BI311975 | BI310208 | BQ612735 | BI787857 | AL502875       | CA018263 |
| BI311975 | BI310254 | BQ612735 | BM177466 | AL502875       | CB874459 |
| BI311975 | BI310609 | BQ612735 | BQ611271 | AL503001       | CA010817 |
| BI311975 | BI311144 | BQ612735 | BQ740512 | AL503441       | BQ465065 |
| BI311975 | BI311465 | BQ612735 | BQ786545 | AL503459       | CA015114 |
| BI311975 | BI311559 | BQ612985 | BQ079584 | AL503480       | CA015272 |
| BI311975 | BI311736 | BQ613004 | CF922575 | AL503661       | BQ469586 |
| BI311975 | CA917058 | BQ613035 | AI965662 | AL503661       | BU978733 |
| BI311975 | CA990327 | BQ613147 | BG352137 | AL503661       | BU979727 |
| BI311975 | CA990382 | BQ613151 | BU579284 | AL503784       | AL505599 |
| BI311975 | CA990637 | BQ627514 | CX701780 | AL503862       | CA001540 |
| BI311975 | CA990996 | BQ627542 | BE330431 | AL503868       | CA013815 |
| BI311975 | CA991181 | BQ627608 | BI893988 | AL503993       | BU998550 |
| BI311975 | CA991244 | BQ627608 | CX703259 | AL504037       | BU983898 |
| BI311975 | CA991307 | BQ627608 | CX709700 | AL504037       | BU998845 |
| BI311975 | CA991364 | BQ627676 | AW395247 | AL504037       | CA022372 |
| BI311975 | CA991409 | BQ627676 | BE330569 | AL504037       | CA031556 |

|          |          |          |          |          |          |
|----------|----------|----------|----------|----------|----------|
| BI312001 | BF003927 | BQ627676 | BF071146 | AL504436 | BQ465065 |
| BI312024 | BI310481 | BQ627676 | BI426317 | AL504464 | CB883595 |
| BI312024 | BI311399 | BQ627676 | BU578411 | AL504776 | BU983173 |
| BI312024 | BI312351 | BQ627676 | CX546983 | AL504915 | BU979702 |
| BI312024 | CA990860 | BQ627676 | CX547601 | AL505008 | BQ459770 |
| BI312106 | BG581972 | BQ627676 | CX711645 | AL505008 | BQ657500 |
| BI312106 | CF069541 | BQ627847 | BG511497 | AL505114 | BQ464934 |
| BI312108 | CA990851 | BQ627847 | BU577106 | AL505183 | BQ467723 |
| BI312137 | BG648303 | BQ627851 | BQ628008 | AL505190 | CA012319 |
| BI312140 | CA991364 | BQ627860 | BQ628008 | AL505348 | AL502908 |
| BI312161 | CA989963 | BQ627885 | BQ610522 | AL505408 | CA000338 |
| BI312206 | BF519778 | BQ628045 | BG511227 | AL505590 | CA005539 |
| BI312239 | BI310255 | BQ628182 | AI965773 | AL505590 | CA007794 |
| BI312239 | BI310982 | BQ628195 | BQ742762 | AL505614 | AL505469 |
| BI312239 | BI311015 | BQ628262 | BQ630257 | AL505614 | CA018263 |
| BI312239 | BI311712 | BQ628351 | AW432821 | AL505614 | CB874459 |
| BI312239 | BI311887 | BQ628351 | AW459772 | AL505680 | AL504769 |
| BI312239 | CA918389 | BQ628483 | BG726551 | AL505680 | BQ470126 |
| BI312239 | CA990860 | BQ628488 | AI965662 | AL505826 | BQ465065 |
| BI312239 | CA990895 | BQ628565 | BE023686 | AL505937 | CB883595 |
| BI312239 | CA991358 | BQ628565 | BI426120 | AL506045 | AL508104 |
| BI312251 | BG581972 | BQ628565 | BQ628008 | AL506293 | BQ467723 |
| BI312251 | CA919999 | BQ628565 | BQ743119 | AL506471 | AL508104 |
| BI312265 | BI310125 | BQ628565 | BQ785797 | AL506512 | AL508104 |
| BI312265 | BI310208 | BQ628565 | BQ785860 | AL506538 | CB883595 |
| BI312265 | BI310609 | BQ628618 | BQ628008 | AL506568 | AL508104 |
| BI312265 | BI311144 | BQ628758 | BG511227 | AL506627 | BQ458407 |
| BI312265 | BI311559 | BQ628794 | BQ628008 | AL506627 | BQ460814 |
| BI312265 | BI311736 | BQ628866 | CX706888 | AL506627 | BQ656997 |
| BI312265 | CA990996 | BQ628936 | BQ628008 | AL506627 | BQ657242 |
| BI312265 | CA991004 | BQ628957 | BG509972 | AL506627 | BQ658205 |
| BI312308 | BI309747 | BQ628958 | BQ628008 | AL506627 | BU976089 |
| BI312308 | BI310125 | BQ628963 | CX712073 | AL506627 | BU978556 |
| BI312308 | BI310208 | BQ629008 | BG511227 | AL506627 | BU979911 |
| BI312308 | BI310254 | BQ629020 | BQ786038 | AL506627 | BU980036 |
| BI312308 | BI310609 | BQ629050 | CX701555 | AL506627 | BU981041 |
| BI312308 | BI311144 | BQ629050 | CX711527 | AL506627 | BU997544 |
| BI312308 | BI311465 | BQ629066 | AW733572 | AL506627 | CA015747 |
| BI312308 | BI311559 | BQ629066 | BE022682 | AL506627 | CA018236 |
| BI312308 | BI311736 | BQ629066 | BE023983 | AL506627 | CA023485 |
| BI312308 | BI312357 | BQ629066 | BE190877 | AL506627 | CA030431 |
| BI312308 | CA917058 | BQ629066 | BG508252 | AL506627 | CA030974 |
| BI312308 | CA990149 | BQ629066 | BG511563 | AL506627 | CA032317 |
| BI312308 | CA990232 | BQ629066 | BI941602 | AL506627 | CA032499 |
| BI312308 | CA990327 | BQ629066 | BI941699 | AL506627 | CB858781 |
| BI312308 | CA990382 | BQ629066 | BM188486 | AL506627 | CB858866 |
| BI312308 | CA990637 | BQ629066 | BQ610760 | AL506627 | CB876285 |
| BI312308 | CA990794 | BQ629066 | BQ628644 | AL506627 | CB877001 |
| BI312308 | CA990996 | BQ629066 | BQ629625 | AL506627 | CB883545 |
| BI312308 | CA991181 | BQ629087 | BF424709 | AL506627 | CK124363 |
| BI312308 | CA991244 | BQ629121 | BQ627625 | AL506627 | CK124688 |
| BI312308 | CA991307 | BQ629121 | BQ628443 | AL506627 | CK125157 |



|          |          |          |          |          |          |
|----------|----------|----------|----------|----------|----------|
| BI312308 | CA991364 | BQ629202 | BU765091 | AL506630 | BQ467003 |
| BI312308 | CA991409 | BQ629204 | BI972353 | AL506691 | CB883595 |
| BI312331 | CF069980 | BQ629234 | BQ610571 | AL506694 | BQ463419 |
| BI312358 | AW776059 | BQ629318 | BU577680 | AL506848 | AL501419 |
| BI312358 | BE124077 | BQ629354 | BI893322 | AL506949 | CA025122 |
| BI312358 | BF005365 | BQ629390 | BQ612063 | AL506979 | CA003754 |
| BI312358 | BF005998 | BQ629456 | BE555632 | AL506996 | AL508104 |
| BI312358 | BF006371 | BQ629456 | BM177466 | AL507108 | BQ467723 |
| BI312358 | BF519000 | BQ629456 | BQ740512 | AL507123 | BQ656377 |
| BI312358 | BF519527 | BQ629465 | AW733831 | AL507123 | CA015597 |
| BI312358 | BF521012 | BQ629476 | BQ628008 | AL507123 | CB880374 |
| BI312358 | BF521098 | BQ629476 | BQ740638 | AL507123 | CK124333 |
| BI312358 | DW019162 | BQ629550 | BQ741738 | AL507195 | AL508104 |
| BI312398 | BI308265 | BQ629577 | BF424714 | AL507207 | CA014652 |
| BI312400 | BI309830 | BQ629638 | BQ628008 | AL507220 | BQ466669 |
| BI312400 | BI310481 | BQ629638 | BQ740638 | AL507220 | BQ468134 |
| BI312400 | BI310576 | BQ629685 | BF066840 | AL507493 | BE421949 |
| BI312400 | CA918389 | BQ629735 | CX707970 | AL507521 | AL508104 |
| BI312400 | CA990895 | BQ629735 | CX711055 | AL507591 | BU979199 |
| BI312400 | CA991223 | BQ629765 | BM177314 | AL507702 | AL508104 |
| BI312400 | CA991383 | BQ629781 | BG363068 | AL507716 | CB883595 |
| BI312401 | AW775693 | BQ629784 | AW306437 | AL507724 | BU994640 |
| BI312401 | AW776059 | BQ629784 | AW311387 | AL507931 | BQ464934 |
| BI312401 | BE124077 | BQ629784 | AW311405 | AL507939 | BQ459770 |
| BI312401 | BF005326 | BQ629784 | BE191110 | AL507939 | BQ657500 |
| BI312401 | BF006000 | BQ629784 | BE330473 | AL507974 | BQ464934 |
| BI312401 | BF518470 | BQ629784 | BE555906 | AL508055 | BQ467723 |
| BI312401 | BF519000 | BQ629784 | BF324096 | AL508151 | AL508104 |
| BI312401 | BF519527 | BQ629784 | BF596311 | AL508197 | BU997543 |
| BI312401 | BF520943 | BQ629784 | BI893897 | AL508294 | CA012726 |
| BI312401 | BF521012 | BQ629784 | BI894055 | AL508335 | BQ467723 |
| BI312401 | BF521098 | BQ629784 | BI944664 | AL508413 | AL508104 |
| BI312401 | CA990481 | BQ629784 | BI971773 | AL508443 | CB878276 |
| BI312401 | DW019162 | BQ629784 | BI974752 | AL508612 | BU983898 |
| BM779026 | BE187651 | BQ629784 | BM886306 | AL508612 | BU999349 |
| BM779026 | BE205141 | BQ629784 | BM886809 | AL508612 | CA022372 |
| BM779026 | BF003466 | BQ629784 | BM887463 | AL508612 | CA031556 |
| BM779026 | BG581653 | BQ629784 | BQ080547 | AL508696 | AL511051 |
| BM779026 | BG582091 | BQ629784 | BQ081612 | AL508696 | CB876133 |
| BM779026 | BG583198 | BQ629784 | BQ612952 | AL508876 | AL507353 |
| BM779026 | BG645176 | BQ629784 | BQ740885 | AL508876 | BQ462771 |
| BM779026 | BG646034 | BQ629784 | BQ741055 | AL509017 | AL508104 |
| BM779026 | BG647604 | BQ629784 | BQ741723 | AL509035 | BQ462664 |
| BM779026 | BG647642 | BQ629784 | BQ742660 | AL509035 | BU978974 |
| BM779026 | BI308066 | BQ629784 | CX704664 | AL509062 | CA002571 |
| BM779026 | BI308281 | BQ629784 | CX705505 | AL509062 | CA010817 |
| BM779026 | BI308430 | BQ629796 | AW733831 | AL509288 | BQ663337 |
| BM779026 | BI308557 | BQ629799 | BG551105 | AL509290 | AL501419 |
| BM779026 | BI308869 | BQ629808 | AW733831 | AL509290 | AL504078 |
| BM779026 | BI309674 | BQ629856 | CX548108 | AL509290 | BQ460282 |
| BM779026 | BI310381 | BQ629856 | CX705942 | AL509290 | BU999349 |
| BM779026 | CA916905 | BQ629916 | BG509972 | AL509290 | CA022372 |

|          |          |          |          |          |          |
|----------|----------|----------|----------|----------|----------|
| BM779026 | CA917234 | BQ629945 | BU082665 | AL509290 | CA031468 |
| BM779026 | CA917308 | BQ629956 | CX702150 | AL509290 | CA031556 |
| BM779026 | CA918115 | BQ629956 | CX702392 | AL509290 | CA033007 |
| BM779026 | CA918192 | BQ629959 | CX705645 | AL509447 | BU977643 |
| BM779026 | CA918321 | BQ629976 | BU082665 | AL509533 | BQ664388 |
| BM779026 | CA991427 | BQ629978 | BE191061 | AL510024 | CA030894 |
| BM779109 | CA918087 | BQ630014 | AW311631 | AL510040 | BQ459770 |
| BM779383 | BQ164760 | BQ630014 | BE058123 | AL510040 | BQ657500 |
| BM779805 | BE942814 | BQ630014 | BQ742001 | AL510160 | CA009015 |
| BM779835 | BI308546 | BQ630014 | BQ742046 | AL510170 | CA012512 |
| BM779897 | CB893282 | BQ630043 | AW432648 | AL510322 | AL501610 |
| BM779908 | BG645907 | BQ630043 | BM188555 | AL510322 | AL507658 |
| BM779926 | BG644861 | BQ630066 | AW733831 | AL510322 | CA002450 |
| BM779927 | BG644861 | BQ630075 | AW099381 | AL510322 | CA002531 |
| BM779972 | BG646417 | BQ630124 | BU082665 | AL510550 | AL506847 |
| BM779995 | CB893853 | BQ630172 | BQ741738 | AL510550 | AL509064 |
| BM780065 | AW774831 | BQ630194 | AW733831 | AL510550 | CB876902 |
| BM780132 | BI307967 | BQ630211 | BU080683 | AL510550 | CB877596 |
| BM780198 | BG646417 | BQ630233 | BM188555 | AL510550 | CB877724 |
| BQ164961 | CA919782 | BQ630246 | BQ741570 | AL510550 | CB877908 |
| BQ164964 | BE998732 | BQ630253 | BM954744 | AL510550 | CB878418 |
| BQ164977 | CA923087 | BQ630253 | BQ080038 | AL510550 | CB878424 |
| BQ165127 | BM779965 | BQ630253 | BQ081052 | AL510607 | CA024249 |
| BQ165249 | BI308546 | BQ630253 | BQ081544 | AL510637 | CB880374 |
| BQ165250 | BI308546 | BQ630253 | BQ740859 | AL511116 | BQ459770 |
| BQ165389 | CB894351 | BQ630253 | BQ741456 | AL511116 | BQ657500 |
| BQ165461 | AW560420 | BQ630253 | BQ742080 | AL511198 | BQ459770 |
| BQ165485 | CB894732 | BQ630253 | BU080748 | AL511198 | BQ657500 |
| BQ165500 | DW016842 | BQ630253 | BU082479 | AL511215 | BQ471943 |
| BQ165532 | BG581972 | BQ630253 | BU082615 | AL511215 | CA000607 |
| BQ165532 | CA919999 | BQ630278 | BQ741738 | AL511215 | CA002531 |
| BQ165547 | BE998365 | BQ630286 | BQ298983 | AL511271 | CA014503 |
| BQ165615 | BE205544 | BQ630377 | BM954514 | AL511345 | CA000828 |
| BQ165626 | BG648663 | BQ630387 | BU080598 | AL511345 | CA002135 |
| BQ165642 | BG647037 | BQ630449 | BM269660 | AL511868 | CB876318 |
| BQ165642 | CB894635 | BQ630467 | BQ741738 | AL511868 | CB876512 |
| BQ165643 | BG647037 | BQ630482 | BE555869 | AL511956 | BU976750 |
| BQ165643 | CB894635 | BQ630505 | BG363079 | AL511995 | CA024816 |
| BQ165813 | AW573612 | BQ630539 | BG511340 | BE420646 | AL450916 |
| BQ165813 | AW777094 | BQ630539 | BI787880 | BE420646 | AL508069 |
| BQ165813 | AW980582 | BQ630539 | BI893234 | BE420646 | BE421753 |
| BQ165813 | BE998599 | BQ630539 | BQ740372 | BE420646 | BQ460883 |
| BQ165813 | BG582018 | BQ740285 | BG511227 | BE420646 | BQ460957 |
| BQ165813 | BG582937 | BQ740343 | BI321518 | BE420646 | BQ463751 |
| BQ165813 | BQ164960 | BQ740343 | BI423783 | BE420646 | BQ463757 |
| BQ165827 | AW775676 | BQ740343 | BI426085 | BE420646 | BQ463786 |
| BQ255280 | AW560420 | BQ740343 | BI971582 | BE420646 | BQ463805 |
| BQ255313 | AW574045 | BQ740343 | BI971723 | BE420646 | BU981098 |
| BQ255313 | CF069222 | BQ740343 | BM954426 | BE420646 | CB876989 |
| BQ750355 | BE239665 | BQ740343 | BM954541 | BE420646 | CB877395 |
| BQ750355 | BG582907 | BQ740343 | BQ080941 | BE420646 | CB877466 |
| BQ750361 | BE240237 | BQ740343 | BQ081491 | BE420646 | CB877625 |

|          |          |          |          |          |          |
|----------|----------|----------|----------|----------|----------|
| CA916811 | BE204445 | BQ740343 | BQ628017 | BE420646 | CB877918 |
| CA916811 | BF519542 | BQ740343 | BQ785104 | BE420646 | CB877958 |
| CA916811 | BG580636 | BQ740343 | BQ785105 | BE420646 | CB878018 |
| CA916811 | BG646530 | BQ740343 | BQ785299 | BE420646 | CB878550 |
| CA916811 | BG648652 | BQ740343 | BQ786187 | BE420646 | CB878874 |
| CA916811 | BI308176 | BQ740343 | BQ786225 | BE420646 | CB879554 |
| CA916811 | CB895138 | BQ740363 | CF922762 | BE421933 | BE421698 |
| CA916939 | BG581923 | BQ740364 | BE555632 | BQ458320 | CA010817 |
| CA916939 | CB892700 | BQ740364 | BF425135 | BQ458335 | CA009378 |
| CA916939 | CB893187 | BQ740367 | BI426085 | BQ458434 | CB876133 |
| CA916939 | CB893419 | BQ740367 | BM954426 | BQ458490 | BQ470189 |
| CA916939 | CF069510 | BQ740367 | BQ081491 | BQ458490 | BQ665082 |
| CA916976 | BI309144 | BQ740367 | BQ628017 | BQ458490 | CA030262 |
| CA916976 | BI309152 | BQ740367 | BQ742891 | BQ458490 | CA032836 |
| CA916976 | CA917680 | BQ740367 | BQ785674 | BQ458490 | CB874778 |
| CA916985 | BG644861 | BQ740367 | BQ786651 | BQ458490 | CB874822 |
| CA916988 | AW774499 | BQ740477 | BG352717 | BQ458490 | CB874865 |
| CA917031 | CA917841 | BQ740521 | BM567853 | BQ458490 | CK123723 |
| CA917060 | BF518800 | BQ740647 | CX706655 | BQ458490 | CK125326 |
| CA917127 | BG644861 | BQ740647 | CX709649 | BQ458604 | AL511051 |
| CA917157 | BF003657 | BQ740816 | BI426106 | BQ458604 | CB876133 |
| CA917255 | BG646164 | BQ740849 | BQ740638 | BQ458677 | CA006703 |
| CA917321 | BG648124 | BQ740874 | AW119915 | BQ458687 | CB876318 |
| CA917321 | CB893559 | BQ740955 | BM177314 | BQ458697 | CB876211 |
| CA917344 | BF004164 | BQ741025 | AI965776 | BQ458697 | CB876512 |
| CA917406 | BE942814 | BQ741267 | BQ628627 | BQ458800 | CA031556 |
| CA917408 | BI307878 | BQ741291 | BQ741738 | BQ458800 | CB876211 |
| CA917424 | BF003601 | BQ741301 | AW459691 | BQ458800 | CB876512 |
| CA917429 | BI308860 | BQ741301 | BM890983 | BQ458836 | CA020051 |
| CA917429 | CA917663 | BQ741345 | AW311388 | BQ458920 | CK122177 |
| CA917466 | CA922644 | BQ741348 | AW119915 | BQ459056 | BQ467723 |
| CA917509 | BG582060 | BQ741374 | BG363092 | BQ459176 | BU978156 |
| CA917579 | CA917969 | BQ741518 | BE330472 | BQ459317 | CB875685 |
| CA917623 | BG644861 | BQ741518 | BI786971 | BQ459317 | CB880737 |
| CA917681 | CA917841 | BQ741520 | CX703175 | BQ459364 | CB876133 |
| CA917749 | DW015846 | BQ741539 | BF325089 | BQ459364 | CB876318 |
| CA917767 | BG582094 | BQ741574 | BU082917 | BQ459374 | CA020051 |
| CA917767 | CF069566 | BQ741598 | BQ740638 | BQ459462 | BU981451 |
| CA917767 | DW015083 | BQ741751 | BQ081457 | BQ459481 | BQ660561 |
| CA917767 | DW018962 | BQ741789 | AI965476 | BQ459481 | BQ660708 |
| CA917837 | BI309152 | BQ741808 | BG726598 | BQ459481 | CA024249 |
| CA917859 | BG644861 | BQ741867 | BQ080038 | BQ459530 | CA002174 |
| CA917960 | DW016842 | BQ741920 | CX707390 | BQ459533 | BQ465671 |
| CA917979 | BG644861 | BQ741985 | AW756861 | BQ459646 | BU994640 |
| CA918083 | BG644903 | BQ742060 | AW733831 | BQ459742 | CA002571 |
| CA918128 | CA916808 | BQ742186 | BQ741738 | BQ459888 | BU999757 |
| CA918198 | CB895002 | BQ742205 | BQ612063 | BQ459915 | AL511051 |
| CA918262 | DW017113 | BQ742231 | BQ741570 | BQ459920 | BQ466648 |
| CA918268 | BE998506 | BQ742231 | CX711963 | BQ460020 | AL511051 |
| CA918311 | AW256725 | BQ742254 | BQ612063 | BQ460020 | CB876512 |
| CA918317 | BE239968 | BQ742287 | BI426284 | BQ460024 | BQ662374 |
| CA918548 | BI309833 | BQ742324 | CX548533 | BQ460028 | BQ463441 |

|          |          |          |          |          |          |
|----------|----------|----------|----------|----------|----------|
| CA918548 | BI311453 | BQ742324 | CX548693 | BQ460102 | CA012570 |
| CA918562 | BI309830 | BQ742414 | BM886810 | BQ460126 | BQ458485 |
| CA918562 | BI310319 | BQ742465 | BE023686 | BQ460126 | BQ459415 |
| CA918562 | BI310767 | BQ742465 | BI426120 | BQ460126 | BQ459614 |
| CA918562 | BI310982 | BQ742465 | BQ628008 | BQ460126 | BQ470969 |
| CA918562 | BI311399 | BQ742465 | BQ743119 | BQ460126 | BQ665604 |
| CA918571 | BE941813 | BQ742465 | BQ785797 | BQ460126 | BU978050 |
| CA918571 | BE943097 | BQ742465 | BQ785860 | BQ460126 | CA030052 |
| CA918571 | BG648489 | BQ742517 | BQ785707 | BQ460126 | CA032528 |
| CA918571 | DW016624 | BQ742518 | AI759850 | BQ460126 | CA032849 |
| CA918821 | CB893616 | BQ742562 | BQ740824 | BQ460126 | CB876516 |
| CA918824 | BF518883 | BQ742573 | BQ628008 | BQ460235 | BU998718 |
| CA918943 | DW015139 | BQ742646 | AI960581 | BQ460255 | CA023835 |
| CA919122 | BI308546 | BQ742649 | BQ785848 | BQ460353 | BQ469586 |
| CA919256 | CA916936 | BQ742695 | BI972353 | BQ460353 | BU978733 |
| CA919339 | BE998411 | BQ742791 | BQ740824 | BQ460353 | BU979727 |
| CA919339 | CF069923 | BQ742799 | BQ785416 | BQ460367 | CB876318 |
| CA919360 | BI311453 | BQ742862 | CX702150 | BQ460371 | BQ665012 |
| CA919363 | CA921752 | BQ742862 | CX702392 | BQ460371 | BU977623 |
| CA919363 | CA922394 | BQ742933 | AW432569 | BQ460371 | BU978339 |
| CA919401 | BI309833 | BQ742933 | BG550884 | BQ460371 | CA026486 |
| CA919401 | BI311453 | BQ742933 | BI321421 | BQ460371 | CB860148 |
| CA919450 | BG582569 | BQ742933 | BM177199 | BQ460376 | AL507953 |
| CA919515 | BG588464 | BQ742933 | BM177201 | BQ460433 | BU999349 |
| CA919621 | CA916831 | BQ742933 | BM177230 | BQ460433 | CA031468 |
| CA919758 | BG647655 | BQ742933 | BM187627 | BQ460433 | CA031556 |
| CA919759 | BG647655 | BQ742933 | BM188328 | BQ460433 | CA033007 |
| CA919775 | CA919782 | BQ742933 | BQ740499 | BQ460490 | CA010817 |
| CA919781 | BE941539 | BQ742933 | BQ742339 | BQ460501 | BU981714 |
| CA919781 | BG581972 | BQ742933 | BQ742495 | BQ460517 | CA012707 |
| CA919781 | CA919999 | BQ742933 | BQ742656 | BQ460627 | CB876133 |
| CA919781 | CF069541 | BQ742933 | BQ742960 | BQ460692 | AL508104 |
| CA919815 | AW574322 | BQ742933 | BQ743098 | BQ460809 | AL511051 |
| CA919849 | BE999252 | BQ742933 | BQ785234 | BQ460809 | BU983898 |
| CA919964 | BE999376 | BQ742933 | BQ785436 | BQ460809 | CB876133 |
| CA919964 | BG582658 | BQ742933 | BQ785612 | BQ460844 | BQ460282 |
| CA919964 | BQ750668 | BQ742933 | BQ785672 | BQ460844 | CB876318 |
| CA919964 | CA920261 | BQ742933 | BQ785674 | BQ460846 | CA012570 |
| CA919964 | CF069876 | BQ742933 | BQ786243 | BQ460971 | AL504955 |
| CA920099 | CB893592 | BQ742933 | BQ786315 | BQ461018 | BQ468279 |
| CA920217 | AW208238 | BQ742933 | BQ786392 | BQ462496 | CA020051 |
| CA920372 | BE999246 | BQ742933 | BQ786651 | BQ462588 | AL507185 |
| CA920487 | AW775294 | BQ742933 | BQ786662 | BQ462659 | AL501419 |
| CA920487 | BG647380 | BQ742933 | BU577039 | BQ462659 | BU999349 |
| CA920487 | BG648304 | BQ742933 | BU578728 | BQ462659 | CA031468 |
| CA920487 | BI310059 | BQ742933 | BU762186 | BQ462659 | CA031556 |
| CA920732 | BG648909 | BQ742933 | BU762350 | BQ462659 | CA033007 |
| CA920832 | BE239394 | BQ743123 | BQ741738 | BQ462659 | CB876133 |
| CA920969 | BI307952 | BQ743124 | AI960581 | BQ462724 | BU994640 |
| CA920972 | CA990941 | BQ743133 | BQ628008 | BQ462755 | BQ470493 |
| CA921057 | CB893592 | BQ743133 | BQ740638 | BQ462755 | CA032117 |
| CA921512 | BE203338 | BQ743160 | BQ740824 | BQ462929 | BQ463441 |

|          |          |          |          |          |          |
|----------|----------|----------|----------|----------|----------|
| CA921512 | CB893348 | BQ743164 | BE610001 | BQ462986 | CA002709 |
| CA921625 | AW257194 | BQ743164 | BM188618 | BQ463403 | AL508104 |
| CA921839 | BE240237 | BQ743164 | BQ740605 | BQ463425 | BQ463441 |
| CA921979 | CB891398 | BQ785188 | BF068690 | BQ463468 | AL503998 |
| CA922045 | CA922074 | BQ785188 | BG509419 | BQ463468 | BU998628 |
| CA922047 | BE942409 | BQ785188 | BG509780 | BQ463474 | CA025667 |
| CA922051 | CA919521 | BQ785188 | BI321004 | BQ463689 | AL508069 |
| CA922223 | BG646672 | BQ785188 | BI321468 | BQ463689 | BQ458472 |
| CA922330 | AW560034 | BQ785188 | BM188390 | BQ463689 | BQ463756 |
| CA922330 | BE941565 | BQ785188 | BM188833 | BQ463689 | BQ463777 |
| CA922330 | BE941604 | BQ785188 | BM270958 | BQ463689 | BQ463859 |
| CA922330 | BQ255324 | BQ785188 | BQ081246 | BQ463689 | BQ468927 |
| CA922330 | CA923133 | BQ785188 | BU578953 | BQ463689 | BQ661055 |
| CA922489 | AW267913 | BQ785188 | BU579049 | BQ463689 | BU976663 |
| CA922489 | BQ165463 | BQ785188 | BU762355 | BQ463689 | CB876746 |
| CA922489 | BQ165620 | BQ785188 | CF922463 | BQ463689 | CB876965 |
| CA922489 | CA919069 | BQ785199 | BI423783 | BQ463689 | CB877172 |
| CA922500 | CA920989 | BQ785199 | BI971582 | BQ463689 | CB877318 |
| CA922649 | CA920568 | BQ785199 | BM177201 | BQ463689 | CB877456 |
| CA922780 | BG647177 | BQ785199 | BM187627 | BQ463689 | CB877463 |
| CA922924 | AI974676 | BQ785199 | BM954426 | BQ463689 | CB877466 |
| CA922924 | BE239657 | BQ785199 | BQ080941 | BQ463689 | CB877537 |
| CA923050 | AW560619 | BQ785199 | BQ742744 | BQ463689 | CB877584 |
| CA989941 | BI310125 | BQ785199 | BQ785234 | BQ463689 | CB877632 |
| CA989941 | BI310208 | BQ785199 | BQ785436 | BQ463689 | CB877785 |
| CA989941 | BI310254 | BQ785199 | BQ786187 | BQ463689 | CB878049 |
| CA989941 | BI311144 | BQ785199 | BQ786225 | BQ463689 | CB878501 |
| CA989941 | BI312357 | BQ785199 | BQ786315 | BQ463689 | CB878587 |
| CA989941 | CA990149 | BQ785199 | BQ786662 | BQ463689 | CB878765 |
| CA989941 | CA990327 | BQ785199 | BU577039 | BQ463689 | CB879159 |
| CA989941 | CA990382 | BQ785221 | AW432569 | BQ463689 | CB879288 |
| CA989941 | CA990637 | BQ785221 | BG550884 | BQ463689 | CB879441 |
| CA989941 | CA990996 | BQ785221 | BI423809 | BQ463811 | BE422277 |
| CA989941 | CA991181 | BQ785221 | BM177199 | BQ463811 | BQ461087 |
| CA989941 | CA991244 | BQ785221 | BM187627 | BQ463811 | BQ463775 |
| CA989941 | CA991307 | BQ785221 | BM188328 | BQ463811 | BQ463803 |
| CA989941 | CA991409 | BQ785221 | BQ079522 | BQ463811 | BQ463807 |
| CA989948 | BI309833 | BQ785221 | BQ740456 | BQ463811 | BQ463949 |
| CA990033 | CA991223 | BQ785221 | BQ740499 | BQ463811 | BU976663 |
| CA990273 | CB893238 | BQ785221 | BQ742656 | BQ463811 | BU981569 |
| CA990320 | BI309833 | BQ785221 | BQ742960 | BQ463811 | BU994067 |
| CA990320 | BI311453 | BQ785221 | BQ743098 | BQ463811 | CA022296 |
| CA990347 | CA918389 | BQ785221 | BQ785612 | BQ463811 | CA024639 |
| CA990347 | CA990208 | BQ785221 | BQ785672 | BQ463811 | CB876989 |
| CA990347 | CA990895 | BQ785221 | BQ786243 | BQ463811 | CB877265 |
| CA990347 | CA991223 | BQ785221 | BU577039 | BQ463811 | CB877456 |
| CA990359 | BI310255 | BQ785221 | BU762186 | BQ463811 | CB877537 |
| CA990359 | BI310536 | BQ785221 | BU762350 | BQ463811 | CB878117 |
| CA990359 | BI310767 | BQ785221 | CX711839 | BQ463811 | CK122816 |
| CA990359 | BI310982 | BQ785262 | BQ785707 | BQ464698 | AL508104 |
| CA990359 | BI311015 | BQ785272 | CX547614 | BQ464844 | AL508104 |
| CA990359 | BI312246 | BQ785282 | BQ740335 | BQ464875 | BQ465242 |

|          |          |          |          |          |          |
|----------|----------|----------|----------|----------|----------|
| CA990359 | CA918389 | BQ785328 | CX549058 | BQ464875 | BQ465661 |
| CA990359 | CA990208 | BQ785347 | CX547614 | BQ464875 | CA009073 |
| CA990359 | CA990895 | BQ785386 | BE555557 | BQ464880 | BU994640 |
| CA990367 | BI309747 | BQ785402 | BI426085 | BQ464892 | BQ664388 |
| CA990367 | BI310125 | BQ785402 | BM954426 | BQ464975 | AL508104 |
| CA990367 | BI310609 | BQ785402 | BQ081491 | BQ464999 | BU999775 |
| CA990367 | BI311144 | BQ785402 | BQ628017 | BQ465025 | AL508104 |
| CA990367 | BI311465 | BQ785402 | BQ742891 | BQ465146 | CA012512 |
| CA990367 | BI311559 | BQ785402 | BQ785674 | BQ465257 | BQ464934 |
| CA990367 | BI311736 | BQ785402 | BQ786651 | BQ465279 | BQ465242 |
| CA990367 | BI311996 | BQ785404 | BQ785707 | BQ465343 | CA012512 |
| CA990367 | CA990232 | BQ785432 | BE059154 | BQ465351 | CA014762 |
| CA990367 | CA990637 | BQ785432 | BM188397 | BQ465361 | CK123004 |
| CA990367 | CA990794 | BQ785470 | CX705924 | BQ465386 | CA016150 |
| CA990367 | CA990996 | BQ785479 | BQ785707 | BQ465485 | AL450957 |
| CA990367 | CA991004 | BQ785483 | BQ628008 | BQ465541 | AL505599 |
| CA990367 | CA991181 | BQ785584 | BM188397 | BQ465982 | CA029427 |
| CA990367 | CA991244 | BQ785621 | CX710809 | BQ466016 | BQ465065 |
| CA990367 | CA991307 | BQ785653 | BI321518 | BQ466055 | CA009106 |
| CA990378 | BI309867 | BQ785653 | BI423783 | BQ466247 | CA015232 |
| CA990378 | BI310322 | BQ785653 | BI426085 | BQ466403 | CA012512 |
| CA990378 | BI310521 | BQ785653 | BI971723 | BQ466412 | BQ466458 |
| CA990378 | BI310754 | BQ785653 | BM954426 | BQ466412 | BQ662740 |
| CA990378 | BI310946 | BQ785653 | BM954539 | BQ466412 | BQ663059 |
| CA990378 | BI311287 | BQ785653 | BQ081491 | BQ466412 | BQ663329 |
| CA990378 | BI311384 | BQ785653 | BQ628017 | BQ466412 | BQ663444 |
| CA990378 | BI311453 | BQ785653 | BQ786187 | BQ466412 | BQ664122 |
| CA990378 | BI311464 | BQ785692 | BU082799 | BQ466412 | BQ664662 |
| CA990378 | BI311472 | BQ785775 | BQ740638 | BQ466412 | CA000130 |
| CA990378 | BI311488 | BQ785807 | BE556070 | BQ466412 | CA006351 |
| CA990378 | BI311743 | BQ785837 | BU082665 | BQ466412 | CA008313 |
| CA990378 | BI312138 | BQ785852 | CX702150 | BQ466412 | CA010166 |
| CA990378 | BI312258 | BQ785852 | CX702392 | BQ466412 | CA010395 |
| CA990378 | CA918401 | BQ785865 | BI321518 | BQ466412 | CA010401 |
| CA990378 | CA918611 | BQ785865 | BI423783 | BQ466412 | CA010429 |
| CA990378 | CA989935 | BQ785865 | BI426085 | BQ466412 | CA010547 |
| CA990378 | CA991127 | BQ785865 | BI971723 | BQ466412 | CA010676 |
| CA990447 | BI309747 | BQ785865 | BM954426 | BQ466412 | CA010690 |
| CA990447 | BI310609 | BQ785865 | BQ081491 | BQ466412 | CA010842 |
| CA990473 | BI309833 | BQ785865 | BQ628017 | BQ466412 | CA010891 |
| CA990473 | BI311453 | BQ785865 | BQ786187 | BQ466412 | CA010935 |
| CA990512 | CA989963 | BQ785892 | BQ298697 | BQ466412 | CA011008 |
| CA990533 | BG646316 | BQ785973 | AI930757 | BQ466412 | CA011042 |
| CA990604 | BI309830 | BQ785973 | AI941400 | BQ466412 | CA011074 |
| CA990604 | BI310481 | BQ785973 | AW395323 | BQ466412 | CA011304 |
| CA990604 | BI310536 | BQ785973 | AW424035 | BQ466412 | CA011319 |
| CA990604 | BI310982 | BQ785973 | AW424125 | BQ466412 | CA011456 |
| CA990604 | BI311399 | BQ785973 | BE057979 | BQ466412 | CA011493 |
| CA990604 | BI312351 | BQ785973 | BF425099 | BQ466412 | CA011561 |
| CA990604 | CA990064 | BQ785973 | BG508318 | BQ466412 | CA011729 |
| CA990604 | CA990860 | BQ785973 | BG508976 | BQ466412 | CA012405 |
| CA990604 | CA990895 | BQ785973 | BG550794 | BQ466412 | CA012463 |

|          |          |          |          |          |          |
|----------|----------|----------|----------|----------|----------|
| CA990619 | BE124323 | BQ785973 | BG550893 | BQ466412 | CA012834 |
| CA990739 | CA989963 | BQ785973 | BI320342 | BQ466412 | CA013253 |
| CA990773 | BI311103 | BQ785973 | BI423837 | BQ466412 | CA013298 |
| CA990773 | BI311479 | BQ785973 | BI423893 | BQ466412 | CA013327 |
| CA990773 | BI311614 | BQ785973 | BI423909 | BQ466412 | CA013886 |
| CA990773 | BI311652 | BQ785973 | BI425254 | BQ466412 | CA014094 |
| CA990773 | CA989914 | BQ785973 | BI426117 | BQ466412 | CA015281 |
| CA990773 | CA990573 | BQ785973 | BI426145 | BQ466533 | AL508104 |
| CA990773 | CA991090 | BQ785973 | BI426281 | BQ466589 | CA002986 |
| CA990773 | CA991287 | BQ785973 | BI893877 | BQ466647 | BQ464934 |
| CA990781 | BI309833 | BQ785973 | BI945346 | BQ466783 | AL508104 |
| CA990819 | BI309747 | BQ785973 | BI972128 | BQ466844 | CA020696 |
| CA990819 | BI310125 | BQ785973 | BM092111 | BQ466865 | CA015288 |
| CA990819 | BI310609 | BQ785973 | BM176947 | BQ466958 | BQ465065 |
| CA990928 | BE941539 | BQ785973 | BM887493 | BQ466969 | BQ464934 |
| CA990928 | BG581972 | BQ785973 | BM891573 | BQ466996 | CA019583 |
| CA990928 | CA919999 | BQ785973 | BM954680 | BQ467018 | AL508104 |
| CA990928 | CF069541 | BQ785973 | BM954689 | BQ467021 | CA030894 |
| CA991005 | BI311103 | BQ785973 | BQ080024 | BQ467043 | CA012512 |
| CA991005 | BI311614 | BQ785973 | BQ298809 | BQ467095 | AL508104 |
| CA991005 | BI311887 | BQ785973 | BQ627827 | BQ467110 | CA023007 |
| CA991009 | BG646447 | BQ785973 | BQ742670 | BQ467110 | CA025956 |
| CA991050 | BI309747 | BQ785973 | BQ785541 | BQ467145 | CA020696 |
| CA991050 | BI310125 | BQ785973 | BQ786268 | BQ467220 | BQ467723 |
| CA991050 | BI310609 | BQ785973 | BQ786546 | BQ467314 | AL500689 |
| CA991050 | BI311144 | BQ785973 | BQ786570 | BQ467394 | CA005539 |
| CA991050 | BI312357 | BQ785973 | BU577142 | BQ467424 | CA016430 |
| CA991050 | CA990794 | BQ785973 | BU578601 | BQ467445 | CA012512 |
| CA991062 | BI309833 | BQ785973 | BU578655 | BQ467453 | BQ465035 |
| CA991062 | BI311453 | BQ785973 | BU766028 | BQ467453 | BQ465242 |
| CA991104 | BI310189 | BQ786002 | BG550884 | BQ467453 | CA008205 |
| CA991149 | BI310125 | BQ786002 | BM177199 | BQ467548 | AL450629 |
| CA991149 | BI310208 | BQ786002 | BM187627 | BQ467558 | AL450629 |
| CA991149 | BI310609 | BQ786002 | BQ740499 | BQ467787 | BQ465242 |
| CA991149 | BI311144 | BQ786002 | BQ742656 | BQ467787 | CA009073 |
| CA991149 | BI311559 | BQ786002 | BQ742960 | BQ467954 | BQ463329 |
| CA991149 | BI311736 | BQ786002 | BQ743098 | BQ467954 | BQ467021 |
| CA991149 | BI311996 | BQ786002 | BQ785612 | BQ467954 | BQ469869 |
| CA991149 | CA990996 | BQ786002 | BQ785672 | BQ467954 | BU996037 |
| CA991179 | BI309741 | BQ786002 | BU762186 | BQ467954 | BU997730 |
| CA991179 | BI310767 | BQ786119 | AW432569 | BQ467954 | BU999382 |
| CA991179 | BI311891 | BQ786119 | BI321421 | BQ467954 | CA031046 |
| CA991179 | BI312246 | BQ786119 | BI423809 | BQ467954 | CK123100 |
| CA991179 | CA989914 | BQ786119 | BM177201 | BQ468231 | CA007794 |
| CA991179 | CA990573 | BQ786119 | BM177230 | BQ468240 | BQ468279 |
| CA991179 | CA990850 | BQ786119 | BM187627 | BQ468481 | CK123004 |
| CA991179 | CA991287 | BQ786119 | BM188328 | BQ468540 | CA009050 |
| CA991264 | CA919395 | BQ786119 | BQ079522 | BQ468816 | AL511051 |
| CA991296 | BI310125 | BQ786119 | BQ740499 | BQ468816 | CA033007 |
| CA991296 | BI310254 | BQ786119 | BQ742339 | BQ469184 | CA009479 |
| CA991296 | BI310609 | BQ786119 | BQ742495 | BQ469358 | CA002915 |
| CA991296 | BI311144 | BQ786119 | BQ785234 | BQ469389 | CA007794 |

|          |          |          |          |          |          |
|----------|----------|----------|----------|----------|----------|
| CA991296 | BI311559 | BQ786119 | BQ785436 | BQ469389 | CA008251 |
| CA991296 | BI311736 | BQ786119 | BQ785674 | BQ469702 | AL507313 |
| CA991296 | CA990042 | BQ786119 | BQ786243 | BQ469812 | CA007007 |
| CA991296 | CA990149 | BQ786119 | BQ786315 | BQ469865 | AL503078 |
| CA991296 | CA990327 | BQ786119 | BQ786392 | BQ469865 | AL505955 |
| CA991296 | CA990382 | BQ786119 | BQ786651 | BQ469865 | AL512099 |
| CA991296 | CA991004 | BQ786119 | BQ786662 | BQ469865 | BQ458493 |
| CA991296 | CA991181 | BQ786119 | BU577039 | BQ469865 | BQ471023 |
| CA991296 | CA991307 | BQ786119 | BU578728 | BQ469865 | BQ657048 |
| CA991296 | CA991350 | BQ786119 | BU762186 | BQ469865 | BQ657116 |
| CA991300 | BI309747 | BQ786119 | BU762350 | BQ469865 | BQ660439 |
| CA991300 | BI310208 | BQ786119 | CX711839 | BQ469865 | BQ665694 |
| CA991300 | BI310609 | BQ786125 | CF922116 | BQ469865 | BU978785 |
| CA991300 | BI311559 | BQ786166 | BM887359 | BQ469865 | BU979676 |
| CA991300 | BI311736 | BQ786177 | BQ742762 | BQ469865 | BU980103 |
| CA991300 | CA917058 | BQ786177 | BQ785860 | BQ469865 | BU981489 |
| CA991300 | CA990232 | BQ786189 | BE023686 | BQ469865 | BU981716 |
| CA991300 | CA990327 | BQ786189 | BI426120 | BQ469865 | BU981851 |
| CA991300 | CA990382 | BQ786189 | BI426238 | BQ469865 | BU982479 |
| CA991300 | CA990794 | BQ786189 | BQ740638 | BQ469865 | BU983268 |
| CA991300 | CA991181 | BQ786189 | BQ743119 | BQ469865 | CA022784 |
| CA991300 | CA991307 | BQ786189 | BQ785797 | BQ469865 | CA030247 |
| CA991300 | CA991364 | BQ786189 | BQ785860 | BQ469865 | CA030665 |
| CA991300 | CA991409 | BQ786202 | BM567853 | BQ469865 | CA030781 |
| CA991310 | BI309524 | BQ786233 | BQ785707 | BQ469865 | CA032239 |
| CA991404 | BI310045 | BQ786253 | BI321510 | BQ469865 | CK122925 |
| CA991404 | BI310319 | BQ786265 | BI423783 | BQ469865 | CK123220 |
| CA991404 | BI310767 | BQ786265 | BI971582 | BQ469865 | CK125455 |
| CA991404 | BI311015 | BQ786265 | BM177201 | BQ469929 | CA007794 |
| CA991404 | BI311103 | BQ786265 | BM187627 | BQ469953 | BU981267 |
| CA991404 | BI311399 | BQ786265 | BM954426 | BQ469963 | BQ465065 |
| CA991404 | CA990492 | BQ786265 | BQ080941 | BQ469986 | CA032458 |
| CA991404 | CA990853 | BQ786265 | BQ742744 | BQ470026 | AL508104 |
| CA991404 | CA990988 | BQ786265 | BQ785234 | BQ470086 | BQ466583 |
| CA991404 | CA991090 | BQ786265 | BQ785436 | BQ470220 | BQ466578 |
| CA991404 | CA991117 | BQ786265 | BQ786187 | BQ470220 | BQ661709 |
| CA991404 | CA991287 | BQ786265 | BQ786225 | BQ470220 | BU998507 |
| CB065447 | CB893144 | BQ786265 | BQ786315 | BQ470220 | CA016879 |
| CB065477 | CA989909 | BQ786265 | BQ786662 | BQ470220 | CA017712 |
| CB065477 | CA990202 | BQ786265 | BU577039 | BQ470220 | CA019398 |
| CB065477 | CB065481 | BQ786281 | BI893230 | BQ470220 | CA021832 |
| CB066621 | BG645491 | BQ786294 | BI423783 | BQ470220 | CA022895 |
| CB066721 | BG644861 | BQ786294 | BQ080941 | BQ470220 | CA031908 |
| CB891067 | AW267885 | BQ786294 | BQ081491 | BQ470220 | CB874591 |
| CB891067 | BI307884 | BQ786294 | BQ628017 | BQ470220 | CB876349 |
| CB891119 | BE204804 | BQ786294 | BQ742495 | BQ470220 | CB876612 |
| CB891158 | CB891962 | BQ786294 | BQ742656 | BQ470220 | CB883641 |
| CB891242 | BG583044 | BQ786294 | BQ742891 | BQ470273 | CA002910 |
| CB891253 | BI310550 | BQ786294 | BQ785105 | BQ470283 | CB880669 |
| CB891292 | BG646492 | BQ786294 | BQ785299 | BQ470285 | AL507779 |
| CB891292 | DW018053 | BQ786294 | BQ785674 | BQ470285 | AL511051 |
| CB891316 | CB891962 | BQ786294 | BQ786187 | BQ470285 | CA031468 |



|          |          |          |          |          |          |
|----------|----------|----------|----------|----------|----------|
| CB891318 | BG647923 | BQ786294 | BQ786225 | BQ470285 | CA031556 |
| CB891343 | BI307977 | BQ786307 | BQ740638 | BQ470285 | CA033007 |
| CB891347 | BI307977 | BQ786314 | BM567853 | BQ470285 | CB876133 |
| CB891356 | AW299058 | BQ786393 | BQ612063 | BQ470340 | CK122408 |
| CB891356 | AW559676 | BQ786475 | AW432569 | BQ470362 | BQ458407 |
| CB891356 | AW560878 | BQ786475 | BG550884 | BQ470362 | BQ459627 |
| CB891356 | BF519090 | BQ786475 | BM177199 | BQ470362 | BQ657242 |
| CB891356 | BG581375 | BQ786475 | BM187627 | BQ470362 | BQ660796 |
| CB891356 | CB892602 | BQ786475 | BQ740456 | BQ470362 | BU997210 |
| CB891404 | BG647923 | BQ786475 | BQ786243 | BQ470362 | CA023581 |
| CB891409 | CB891259 | BQ786475 | BU577039 | BQ470362 | CA033016 |
| CB891589 | CB895065 | BQ786475 | BU762186 | BQ470362 | CB858866 |
| CB891621 | DW017799 | BQ786475 | BU762350 | BQ470362 | CB875558 |
| CB891662 | AW773706 | BQ786475 | CX711839 | BQ470386 | CA012726 |
| CB891668 | BE997437 | BQ786478 | CX701309 | BQ470423 | BU976260 |
| CB891668 | BI309091 | BQ786515 | BG550884 | BQ470423 | CB875796 |
| CB891683 | BF003671 | BQ786515 | BI321518 | BQ470565 | CA030894 |
| CB891684 | AW559344 | BQ786515 | BI423783 | BQ470599 | BQ460814 |
| CB891684 | BI309130 | BQ786515 | BI423809 | BQ470599 | BQ656997 |
| CB891697 | AW127326 | BQ786515 | BI971582 | BQ470599 | BU979911 |
| CB891697 | BE202672 | BQ786515 | BI971723 | BQ470599 | BU980036 |
| CB891697 | BE941150 | BQ786515 | BM177199 | BQ470599 | BU981041 |
| CB891697 | BF003238 | BQ786515 | BM187627 | BQ470599 | BU997544 |
| CB891697 | BF004133 | BQ786515 | BM188328 | BQ470599 | CA023485 |
| CB891697 | BF519936 | BQ786515 | BM954426 | BQ470599 | CA030974 |
| CB891697 | BF521042 | BQ786515 | BM954541 | BQ470599 | CA032317 |
| CB891697 | CA917935 | BQ786515 | BQ079522 | BQ470599 | CB858866 |
| CB891697 | CA918919 | BQ786515 | BQ081491 | BQ470599 | CB876285 |
| CB891697 | CB893634 | BQ786515 | BQ742960 | BQ470612 | AL501419 |
| CB891697 | DW017487 | BQ786515 | BQ743098 | BQ470612 | CA031556 |
| CB891789 | BG644585 | BQ786515 | BQ785104 | BQ470612 | CB876133 |
| CB891933 | BE997470 | BQ786515 | BQ785672 | BQ470612 | CB876211 |
| CB891933 | CF069871 | BQ786515 | BQ786187 | BQ470612 | CB876512 |
| CB891950 | AW777030 | BQ786515 | BU762350 | BQ470753 | CA020142 |
| CB891954 | BG647818 | BQ786515 | CX711839 | BQ470754 | CA025649 |
| CB892005 | CA917486 | BQ786518 | AW156460 | BQ470837 | BQ460282 |
| CB892011 | AW207984 | BQ786518 | BG550884 | BQ470837 | CA022372 |
| CB892011 | BG647083 | BQ786518 | BM177199 | BQ470854 | AL502737 |
| CB892176 | BF004344 | BQ786518 | BM187627 | BQ470901 | BQ459406 |
| CB892184 | AW299118 | BQ786518 | BQ742960 | BQ470901 | BQ656971 |
| CB892219 | AW980840 | BQ786518 | BQ743098 | BQ470901 | BU978461 |
| CB892227 | BE187554 | BQ786518 | BQ785672 | BQ470901 | CA002500 |
| CB892256 | AW256515 | BQ786518 | BU577677 | BQ470901 | CB877042 |
| CB892277 | BG644861 | BQ786518 | BU578728 | BQ471196 | BQ466970 |
| CB892354 | CB894403 | BQ786535 | AW156460 | BQ471330 | CA005145 |
| CB892374 | BQ164760 | BQ786535 | BG550884 | BQ471330 | CA008704 |
| CB892470 | BG647923 | BQ786535 | BI423783 | BQ471375 | CB878079 |
| CB892470 | BG647965 | BQ786535 | BI971582 | BQ471458 | CA005539 |
| CB892488 | BG644861 | BQ786535 | BM177199 | BQ471459 | BQ471499 |
| CB892500 | BG647923 | BQ786535 | BM177201 | BQ471459 | CA009516 |
| CB892500 | BG647965 | BQ786535 | BM187627 | BQ471459 | CA031335 |
| CB892525 | BQ255177 | BQ786535 | BM954426 | BQ471459 | CB880471 |

|          |          |          |          |          |          |
|----------|----------|----------|----------|----------|----------|
| CB892550 | CA919521 | BQ786535 | BM954541 | BQ471633 | CA002709 |
| CB892641 | AW256888 | BQ786535 | BQ080941 | BQ471659 | AL508104 |
| CB892904 | BG646592 | BQ786535 | BQ081491 | BQ471705 | AL501419 |
| CB892937 | BG648938 | BQ786535 | BQ628017 | BQ471784 | BU999349 |
| CB892954 | CB894351 | BQ786535 | BQ742744 | BQ471956 | CA016430 |
| CB893427 | CB894351 | BQ786535 | BQ742960 | BQ472001 | AL507953 |
| CB893546 | BG646316 | BQ786535 | BQ742970 | BQ472059 | AL507217 |
| CB893768 | BI308265 | BQ786535 | BQ743098 | BQ472059 | BQ462551 |
| CB893775 | BI307839 | BQ786535 | BQ785104 | BQ472081 | CB882148 |
| CB893775 | CB895102 | BQ786535 | BQ785105 | BQ472129 | BQ466395 |
| CB893798 | BE202897 | BQ786535 | BQ785234 | BQ472129 | CA002756 |
| CB893867 | AW775792 | BQ786535 | BQ785299 | BQ472129 | CA011689 |
| CB893867 | DW017693 | BQ786535 | BQ785436 | BQ472129 | CA012970 |
| CB893877 | AW560420 | BQ786535 | BQ785672 | BQ472207 | AL507953 |
| CB893916 | CB893592 | BQ786535 | BQ786187 | BQ472247 | CA005391 |
| CB894129 | CA923087 | BQ786535 | BQ786225 | BQ656251 | BQ458407 |
| CB894349 | AW560420 | BQ786535 | BQ786315 | BQ656251 | BQ459627 |
| CB894395 | BG648938 | BQ786535 | BQ786662 | BQ656251 | BU980036 |
| CB894416 | BG647923 | BQ786535 | BU577039 | BQ656251 | BU997210 |
| CB894441 | BG648565 | BQ786535 | BU577677 | BQ656251 | CA023581 |
| CB894456 | BG644861 | BQ786572 | BU082917 | BQ656251 | CA033016 |
| CB894536 | BE942409 | BQ786581 | BG508985 | BQ656278 | BQ459148 |
| CB894542 | CA991065 | BQ786581 | BG509065 | BQ656281 | BQ471010 |
| CB894579 | BG583097 | BQ786599 | CX705942 | BQ656281 | BU983289 |
| CB894719 | BE998411 | BQ786600 | CX548810 | BQ656286 | BQ665983 |
| CB894719 | BE998958 | BQ786600 | CX712116 | BQ656286 | CA030218 |
| CB894719 | CF069923 | BQ786636 | AW099381 | BQ656286 | CA031280 |
| CB894782 | AW560420 | BQ786694 | BQ628008 | BQ656286 | CA032840 |
| CB894871 | CA920472 | BQ786701 | BQ628008 | BQ656286 | CB874822 |
| CB894955 | BG648938 | BQ786711 | BM567853 | BQ656357 | CB876318 |
| CB894969 | BE124721 | BQ786753 | CX702686 | BQ656357 | CB876512 |
| CB895012 | BE203909 | BU080496 | BU765973 | BQ656374 | BQ469567 |
| CB895012 | CB894463 | BU080496 | CX702143 | BQ656374 | BQ470766 |
| CB895021 | BE204888 | BU080496 | CX702440 | BQ656374 | CA028158 |
| CB895085 | BG645366 | BU080562 | BE555952 | BQ656401 | CB876318 |
| CB895085 | BG645374 | BU080703 | CX547368 | BQ656404 | BQ469586 |
| CB895147 | DW017298 | BU080842 | AI416781 | BQ656404 | BU978733 |
| CB895171 | BE997402 | BU080842 | AW433229 | BQ656404 | BU979727 |
| CF067942 | AW560420 | BU080842 | BE329579 | BQ656404 | BU980825 |
| CF068009 | AW127577 | BU080842 | BE329949 | BQ656404 | BU981125 |
| CF068009 | BF005039 | BU080842 | BE554838 | BQ656457 | BU999349 |
| CF068009 | BF005250 | BU080842 | BE555193 | BQ656457 | CA031468 |
| CF068050 | BF519733 | BU080842 | BG550651 | BQ656457 | CA031556 |
| CF068100 | CA919030 | BU080842 | BI317684 | BQ656457 | CA033007 |
| CF068151 | DW015139 | BU080842 | BI971633 | BQ656569 | CA014412 |
| CF068204 | CB893088 | BU080842 | BM188573 | BQ656760 | CK125849 |
| CF068227 | DW016348 | BU080842 | BM887387 | BQ656826 | BQ459770 |
| CF068288 | CA917474 | BU080842 | BQ629663 | BQ656826 | BQ657500 |
| CF068374 | AW127366 | BU080842 | BQ629976 | BQ656905 | BU995707 |
| CF068374 | AW127412 | BU080842 | BQ740333 | BQ656905 | CB880737 |
| CF068374 | AW127478 | BU080842 | BQ785837 | BQ656905 | CB883252 |
| CF068374 | AW127479 | BU080842 | BU082523 | BQ656909 | CA010817 |

|          |          |          |          |          |          |
|----------|----------|----------|----------|----------|----------|
| CF068374 | AW127483 | BU080842 | BU082527 | BQ656963 | AL511051 |
| CF068374 | AW127496 | BU080852 | BU082665 | BQ656963 | BU983898 |
| CF068374 | AW127548 | BU080911 | CX547230 | BQ656963 | CB876133 |
| CF068374 | AW775338 | BU080929 | BE023686 | BQ657038 | BQ462517 |
| CF068374 | AW775433 | BU080929 | BI426120 | BQ657038 | BQ463351 |
| CF068374 | AW775730 | BU080929 | BQ743119 | BQ657038 | BQ469586 |
| CF068374 | AW775753 | BU080929 | BQ785797 | BQ657038 | BQ469756 |
| CF068374 | AW775883 | BU080929 | BQ785860 | BQ657038 | BU977829 |
| CF068374 | AW775894 | BU080957 | BM177314 | BQ657038 | BU978733 |
| CF068374 | AW775960 | BU082480 | BF071336 | BQ657038 | BU979727 |
| CF068374 | AW776074 | BU082523 | BU082665 | BQ657038 | BU980825 |
| CF068374 | AW776236 | BU082544 | BU082665 | BQ657038 | BU981647 |
| CF068374 | AW776353 | BU082617 | BI973031 | BQ657050 | AL511051 |
| CF068374 | AW776376 | BU082617 | BU080826 | BQ657050 | CB876133 |
| CF068374 | AW776429 | BU082635 | BG551105 | BQ657050 | CB876318 |
| CF068374 | AW776436 | BU082637 | BQ080138 | BQ657135 | AL501419 |
| CF068374 | AW776527 | BU082641 | BE556070 | BQ657135 | BU999349 |
| CF068374 | AW776587 | BU082655 | BM187646 | BQ657135 | CA031468 |
| CF068374 | AW776792 | BU082672 | BG511338 | BQ657135 | CA031556 |
| CF068374 | AW776879 | BU082672 | BI786946 | BQ657135 | CA033007 |
| CF068374 | AW980374 | BU082699 | CX706838 | BQ657135 | CB876133 |
| CF068374 | AW981181 | BU082763 | BQ741738 | BQ657145 | BU999349 |
| CF068374 | AW981269 | BU082766 | BQ627925 | BQ657279 | CA024249 |
| CF068374 | AW981303 | BU082891 | BM567831 | BQ657324 | CA002174 |
| CF068374 | BE124028 | BU082891 | CX710095 | BQ657324 | CA023041 |
| CF068374 | BE124031 | BU082892 | BQ741738 | BQ657509 | CA010817 |
| CF068374 | BE124038 | BU082928 | BQ740566 | BQ657511 | CB876133 |
| CF068374 | BE124039 | BU082942 | BE555952 | BQ657604 | AL501419 |
| CF068374 | BE124092 | BU577005 | BM187879 | BQ657643 | BQ458407 |
| CF068374 | BE124127 | BU577005 | BQ628285 | BQ657643 | BQ459627 |
| CF068374 | BE124141 | BU577086 | BI321500 | BQ657643 | BQ460814 |
| CF068374 | BE124275 | BU577093 | BI972113 | BQ657643 | BU979911 |
| CF068374 | BF004951 | BU577103 | AW423843 | BQ657643 | BU980036 |
| CF068374 | BF005027 | BU577131 | BG511227 | BQ657643 | BU981041 |
| CF068374 | BF005056 | BU577180 | BG511227 | BQ657643 | BU997210 |
| CF068374 | BF005057 | BU577215 | BG511227 | BQ657643 | BU997544 |
| CF068374 | BF005143 | BU577256 | BU577669 | BQ657643 | CA023485 |
| CF068374 | BF005196 | BU577256 | BU577873 | BQ657643 | CA023581 |
| CF068374 | BF005208 | BU577265 | BG511227 | BQ657643 | CA032317 |
| CF068374 | BF005265 | BU577345 | CX547230 | BQ657643 | CA033016 |
| CF068374 | BF005364 | BU577348 | BG511227 | BQ657675 | BU999349 |
| CF068374 | BF005419 | BU577388 | BU082830 | BQ657675 | CA031468 |
| CF068374 | BF005445 | BU577407 | BM177277 | BQ657675 | CA031556 |
| CF068374 | BF005523 | BU577428 | BE330472 | BQ657675 | CA033007 |
| CF068374 | BF005605 | BU577453 | BG511227 | BQ657675 | CB876133 |
| CF068374 | BF005651 | BU577471 | BG511227 | BQ657762 | CK124989 |
| CF068374 | BF005686 | BU577495 | AW733831 | BQ657909 | BQ459770 |
| CF068374 | BF005742 | BU577530 | BG511227 | BQ657909 | BQ657500 |
| CF068374 | BF005760 | BU577613 | AW156460 | BQ658043 | CA006133 |
| CF068374 | BF005822 | BU577613 | AW432569 | BQ658061 | AL501419 |
| CF068374 | BF005824 | BU577613 | BI321421 | BQ658061 | CB876133 |
| CF068374 | BF005826 | BU577613 | BM177201 | BQ658061 | CB876211 |

|          |          |          |          |          |          |
|----------|----------|----------|----------|----------|----------|
| CF068374 | BF005906 | BU577613 | BM177230 | BQ658061 | CB876512 |
| CF068374 | BF005950 | BU577613 | BM187627 | BQ658130 | CA010817 |
| CF068374 | BF005952 | BU577613 | BM188328 | BQ658152 | AL504078 |
| CF068374 | BF005973 | BU577613 | BQ742960 | BQ658152 | BU983898 |
| CF068374 | BF006020 | BU577613 | BQ785234 | BQ658152 | BU998845 |
| CF068374 | BF006052 | BU577613 | BQ785436 | BQ658152 | BU999349 |
| CF068374 | BF006077 | BU577613 | BQ785672 | BQ658152 | CA022372 |
| CF068374 | BF006167 | BU577613 | BQ786315 | BQ658152 | CA031556 |
| CF068374 | BF006226 | BU577613 | BQ786392 | BQ658152 | CB876211 |
| CF068374 | BF006316 | BU577613 | BQ786662 | BQ658152 | CB876512 |
| CF068374 | BF006365 | BU577613 | BU577039 | BQ658213 | CA010817 |
| CF068374 | BF006378 | BU577613 | BU577677 | BQ659413 | CA010817 |
| CF068374 | BF006416 | BU577613 | BU578728 | BQ659899 | BQ463777 |
| CF068374 | BF006429 | BU577613 | BU762350 | BQ659899 | BQ468927 |
| CF068374 | BF006453 | BU577623 | BU765058 | BQ659899 | BU976663 |
| CF068374 | BF006465 | BU577639 | BQ786038 | BQ659899 | CB876746 |
| CF068374 | BF006544 | BU577648 | BF425135 | BQ659899 | CB877172 |
| CF068374 | BF006555 | BU577648 | BI787857 | BQ659899 | CB877318 |
| CF068374 | BF006558 | BU577648 | BQ611271 | BQ659899 | CB877456 |
| CF068374 | BF006630 | BU577655 | BE330472 | BQ659899 | CB877466 |
| CF068374 | BF006745 | BU577655 | BI786971 | BQ659899 | CB877584 |
| CF068374 | BF006747 | BU577662 | CX705592 | BQ659899 | CB877632 |
| CF068374 | BF518517 | BU577662 | CX705812 | BQ659899 | CB877785 |
| CF068374 | BF518559 | BU577674 | BG511227 | BQ659899 | CB878049 |
| CF068374 | BF518665 | BU577709 | BM891728 | BQ659899 | CB878501 |
| CF068374 | BF518728 | BU577724 | BG511227 | BQ659899 | CB878587 |
| CF068374 | BF518862 | BU577782 | BG511227 | BQ659899 | CB878765 |
| CF068374 | BF518887 | BU577785 | BI423809 | BQ659904 | BU977643 |
| CF068374 | BF518918 | BU577785 | BM177201 | BQ659991 | BE422277 |
| CF068374 | BF518946 | BU577785 | BM187627 | BQ659991 | BQ461087 |
| CF068374 | BF519046 | BU577785 | BM188328 | BQ659991 | BQ463775 |
| CF068374 | BF519051 | BU577785 | BQ079522 | BQ659991 | BQ463803 |
| CF068374 | BF519101 | BU577785 | BQ785234 | BQ659991 | BQ463807 |
| CF068374 | BF519186 | BU577785 | BQ785436 | BQ659991 | BQ463949 |
| CF068374 | BF519313 | BU577785 | BQ786315 | BQ659991 | BU976663 |
| CF068374 | BF519471 | BU577785 | BQ786662 | BQ659991 | BU981569 |
| CF068374 | BF519485 | BU577785 | BU577039 | BQ659991 | BU994067 |
| CF068374 | BF519502 | BU577785 | BU762350 | BQ659991 | CA022296 |
| CF068374 | BF519529 | BU577785 | CX711839 | BQ659991 | CA024639 |
| CF068374 | BF519579 | BU577800 | BU578879 | BQ659991 | CB876989 |
| CF068374 | BF519601 | BU577897 | BG511227 | BQ659991 | CB877265 |
| CF068374 | BF519636 | BU577916 | BG511227 | BQ659991 | CB877456 |
| CF068374 | BF519640 | BU577923 | BM890955 | BQ659991 | CB877537 |
| CF068374 | BF519678 | BU577933 | BG551105 | BQ659991 | CB878117 |
| CF068374 | BF519735 | BU577979 | BG352552 | BQ659991 | CK122816 |
| CF068374 | BF519745 | BU577979 | BQ742077 | BQ660125 | CA020051 |
| CF068374 | BF519789 | BU578047 | BG511227 | BQ660324 | BU976750 |
| CF068374 | BF519818 | BU578066 | BQ629760 | BQ660474 | CA000828 |
| CF068374 | BF519853 | BU578121 | BI975051 | BQ660474 | CA002135 |
| CF068374 | BF519860 | BU578143 | BG550884 | BQ660680 | AL505185 |
| CF068374 | BF519882 | BU578143 | BM177199 | BQ660709 | BQ459770 |
| CF068374 | BF519888 | BU578143 | BM187627 | BQ660709 | BQ657500 |

|          |          |          |          |          |          |
|----------|----------|----------|----------|----------|----------|
| CF068374 | BF519896 | BU578143 | BQ742960 | BQ661107 | CA020051 |
| CF068374 | BF519957 | BU578143 | BQ743098 | BQ661347 | AL502737 |
| CF068374 | BF519972 | BU578143 | BQ785672 | BQ661654 | CB879970 |
| CF068374 | BF520002 | BU578165 | CF922816 | BQ661673 | BU976750 |
| CF068374 | BF520020 | BU578196 | BE191511 | BQ661852 | CA005539 |
| CF068374 | BF520026 | BU578249 | BG511227 | BQ662017 | CA030513 |
| CF068374 | BF520045 | BU578291 | BG511227 | BQ662141 | CA020051 |
| CF068374 | BF520071 | BU578319 | BE191229 | BQ662316 | CA020696 |
| CF068374 | BF520137 | BU578319 | BQ628285 | BQ662544 | CA010817 |
| CF068374 | BF520142 | BU578340 | BG511227 | BQ662616 | BQ663059 |
| CF068374 | BF520300 | BU578367 | BG511227 | BQ662616 | BQ664122 |
| CF068374 | BF520318 | BU578473 | BQ742315 | BQ662616 | BQ664662 |
| CF068374 | BF520330 | BU578474 | BG511227 | BQ662616 | CA000130 |
| CF068374 | BF520346 | BU578497 | AW396108 | BQ662616 | CA010166 |
| CF068374 | BF520359 | BU578497 | BE022682 | BQ662616 | CA010395 |
| CF068374 | BF520370 | BU578497 | BE023983 | BQ662616 | CA010401 |
| CF068374 | BF520409 | BU578497 | BG508252 | BQ662616 | CA010547 |
| CF068374 | BF520433 | BU578497 | BG508395 | BQ662616 | CA010842 |
| CF068374 | BF520446 | BU578497 | BG511563 | BQ662616 | CA010935 |
| CF068374 | BF520484 | BU578497 | BI941699 | BQ662616 | CA011008 |
| CF068374 | BF520529 | BU578497 | BM567940 | BQ662616 | CA011042 |
| CF068374 | BF520537 | BU578497 | BQ298597 | BQ662616 | CA011074 |
| CF068374 | BF520567 | BU578497 | BQ628780 | BQ662616 | CA011319 |
| CF068374 | BF520627 | BU578503 | BG511227 | BQ662616 | CA011561 |
| CF068374 | BF520683 | BU578512 | BG511227 | BQ662616 | CA012834 |
| CF068374 | BF520724 | BU578571 | BI893994 | BQ662616 | CA013298 |
| CF068374 | BF520735 | BU578590 | BG511227 | BQ662616 | CA013327 |
| CF068374 | BF520764 | BU578606 | BG511227 | BQ662616 | CA014094 |
| CF068374 | BF520826 | BU578624 | CF922136 | BQ662648 | CA010817 |
| CF068374 | BF520866 | BU578624 | CF922205 | BQ662733 | BQ467194 |
| CF068374 | BF521099 | BU578624 | CX703026 | BQ662733 | CA004123 |
| CF068374 | BF521119 | BU578639 | BG511227 | BQ662751 | CA005539 |
| CF068374 | BF521161 | BU578641 | BG511227 | BQ662763 | CA009015 |
| CF068374 | BF521255 | BU578667 | BG511227 | BQ662811 | CA002303 |
| CF068374 | BF521333 | BU578677 | BF067003 | BQ662811 | CA002639 |
| CF068374 | BF521431 | BU578704 | BG511227 | BQ662811 | CA002902 |
| CF068374 | BI309449 | BU578808 | BQ079934 | BQ662859 | CA010817 |
| CF068374 | BI309810 | BU578850 | BG511227 | BQ662944 | BQ460131 |
| CF068374 | BI310896 | BU578892 | AW394631 | BQ663132 | BQ664388 |
| CF068374 | BI310901 | BU578905 | BG511227 | BQ663171 | BQ665811 |
| CF068374 | CA917077 | BU578906 | BG511227 | BQ663201 | CA010817 |
| CF068374 | CF068585 | BU578985 | AI960590 | BQ663345 | CA002571 |
| CF068382 | CA918087 | BU578991 | BG511227 | BQ663380 | CA010817 |
| CF068573 | CA920510 | BU579002 | BG511227 | BQ663450 | CA010817 |
| CF068698 | CA990941 | BU579042 | BG511227 | BQ663463 | AL500480 |
| CF068704 | CA989963 | BU579110 | BI893602 | BQ663516 | BQ662789 |
| CF068736 | CA919395 | BU579165 | BG511227 | BQ663675 | CA002571 |
| CF068801 | CA921752 | BU579206 | BU080759 | BQ663675 | CA010817 |
| CF068801 | CA922394 | BU579307 | BG511227 | BQ663689 | CA010817 |
| CF068901 | BG582569 | BU579322 | CX702225 | BQ663951 | CA010817 |
| CF068973 | BI308047 | BU579356 | BI974803 | BQ664291 | CA009015 |
| CF068973 | BI308551 | BU579401 | BG511227 | BQ664387 | CA000679 |

|          |          |          |          |          |          |
|----------|----------|----------|----------|----------|----------|
| CF068973 | BI308651 | BU762101 | BM188816 | BQ664387 | CA016408 |
| CF068973 | BI308855 | BU762160 | CX548533 | BQ664453 | CA009015 |
| CF068973 | BI309485 | BU762160 | CX548693 | BQ664501 | BQ659972 |
| CF068973 | BI309693 | BU762211 | BE330278 | BQ664501 | BQ660029 |
| CF068973 | BI310865 | BU762211 | BU762283 | BQ664600 | CA010817 |
| CF068973 | CA916994 | BU762217 | BF425401 | BQ664708 | CA002756 |
| CF068973 | CA917328 | BU762272 | BG511227 | BQ664708 | CA011689 |
| CF068973 | CA917338 | BU762282 | BG511227 | BQ664708 | CA013013 |
| CF068973 | CA917362 | BU762365 | BG511375 | BQ664708 | CA015098 |
| CF068973 | CA918064 | BU762392 | BQ081360 | BQ664777 | BQ663337 |
| CF068973 | CF069007 | BU762392 | BQ081558 | BQ664777 | CA005391 |
| CF069160 | BG583270 | BU765035 | BG511227 | BQ664964 | BU978733 |
| CF069223 | DW016842 | BU765068 | BG511227 | BQ664964 | CA025254 |
| CF069242 | BE941539 | BU765075 | BG511227 | BQ665041 | BQ458562 |
| CF069242 | CA919999 | BU765096 | AW396108 | BQ665041 | BQ470350 |
| CF069242 | CF069541 | BU765096 | BE022682 | BQ665041 | BU978733 |
| CF069248 | BE999049 | BU765096 | BE023983 | BQ665041 | BU979727 |
| CF069302 | CA922836 | BU765096 | BE190877 | BQ665041 | BU982636 |
| CF069317 | BE999049 | BU765096 | BG508395 | BQ665041 | CA025254 |
| CF069317 | BG583270 | BU765096 | BG511563 | BQ665104 | BQ458407 |
| CF069321 | BG582860 | BU765096 | BI941602 | BQ665104 | BQ459627 |
| CF069324 | CB893793 | BU765096 | BI941699 | BQ665104 | BQ460814 |
| CF069357 | BE999362 | BU765096 | BM567940 | BQ665104 | BQ656997 |
| CF069366 | AW127297 | BU765096 | BQ298597 | BQ665104 | BU981041 |
| CF069457 | BQ255259 | BU765096 | BQ610760 | BQ665104 | BU999456 |
| CF069508 | BG583866 | BU765096 | BQ628644 | BQ665104 | CA020746 |
| CF069514 | BG582777 | BU765096 | BQ629625 | BQ665104 | CA023485 |
| CF069514 | BG582881 | BU765122 | AW396108 | BQ665104 | CA030974 |
| CF069604 | BQ165485 | BU765122 | AW733572 | BQ665104 | CB858497 |
| CF069604 | CF069213 | BU765122 | BE022682 | BQ665104 | CB858571 |
| CF069646 | BQ750670 | BU765122 | BE023983 | BQ665113 | BQ466578 |
| CF069663 | CF069810 | BU765122 | BE190877 | BQ665113 | BQ661709 |
| CF069665 | AW980936 | BU765122 | BG508252 | BQ665113 | BU998507 |
| CF069683 | BE999376 | BU765122 | BG508395 | BQ665113 | CA016879 |
| CF069683 | BG582658 | BU765122 | BG511563 | BQ665113 | CA017712 |
| CF069683 | BQ750668 | BU765122 | BI941602 | BQ665113 | CA019398 |
| CF069683 | CA920261 | BU765122 | BI941699 | BQ665113 | CA021832 |
| CF069683 | CF069876 | BU765122 | BM567940 | BQ665113 | CA022895 |
| CF069756 | BG582691 | BU765122 | BQ298597 | BQ665113 | CA031908 |
| CF069758 | AW573612 | BU765122 | BQ610760 | BQ665113 | CB874591 |
| CF069758 | AW775254 | BU765122 | BQ628644 | BQ665113 | CB876349 |
| CF069758 | AW777094 | BU765122 | BQ629625 | BQ665113 | CB876612 |
| CF069758 | AW980582 | BU765125 | BG511227 | BQ665113 | CB883641 |
| CF069758 | BE998599 | BU765918 | BF324953 | BQ665201 | CK124170 |
| CF069758 | BE999347 | BU765918 | BF324954 | BQ665326 | AL511051 |
| CF069758 | BG580556 | BU765921 | BG511227 | BQ665507 | BQ469586 |
| CF069758 | BG580806 | BU765926 | BE556065 | BQ665507 | BU978733 |
| CF069758 | BG582018 | BU765943 | BQ786038 | BQ665507 | BU979727 |
| CF069758 | BG582937 | BU765972 | BG511227 | BQ665507 | BU980825 |
| CF069758 | BG583432 | CF921579 | CF922717 | BQ665507 | BU981125 |
| CF069758 | BQ164960 | CF921582 | BG551161 | BQ665507 | CA025254 |
| CF069758 | BQ165785 | CF921621 | BF067378 | BQ665508 | BU976750 |

|          |          |          |          |          |          |
|----------|----------|----------|----------|----------|----------|
| CF069758 | BQ750675 | CF921646 | BF067396 | BQ665564 | BU983898 |
| CF069796 | CF069437 | CF921646 | BI973084 | BQ665564 | BU998845 |
| DW015103 | BM779975 | CF921646 | BQ629362 | BQ665564 | CA022372 |
| DW015218 | AW773695 | CF921646 | BU080663 | BQ665564 | CA031556 |
| DW015275 | BF519187 | CF921652 | AW459538 | BQ665564 | CB876211 |
| DW015461 | BG582094 | CF921705 | CF922035 | BQ665564 | CB876512 |
| DW015461 | CF069566 | CF921705 | CF922348 | BQ665596 | BU978733 |
| DW015461 | DW015083 | CF921735 | BI971593 | BQ665596 | CA025254 |
| DW015461 | DW018962 | CF921788 | CF921808 | BQ665612 | BQ459406 |
| DW015658 | AW776940 | CF921788 | CF921853 | BQ665612 | BU978461 |
| DW015713 | DW019432 | CF921788 | CF922162 | BQ665653 | CA017555 |
| DW015726 | AW775661 | CF921788 | CF922245 | BQ665829 | CB858262 |
| DW015726 | AW776413 | CF921788 | CF922739 | BQ665845 | AL501419 |
| DW015726 | AW776971 | CF921788 | CF922893 | BQ665845 | CB876133 |
| DW015726 | AW981299 | CF921788 | CF923039 | BQ665845 | CB876211 |
| DW015726 | BE123966 | CF921806 | BM523143 | BQ665845 | CB876318 |
| DW015726 | BF005312 | CF921806 | BM523171 | BQ665845 | CB876512 |
| DW015726 | BF005891 | CF921806 | CF922053 | BQ665912 | BQ459770 |
| DW015726 | BF006087 | CF921806 | CX702539 | BQ665912 | BQ657500 |
| DW015726 | BF006418 | CF921806 | CX705616 | BU976054 | CA002571 |
| DW015726 | BF518894 | CF921806 | CX705890 | BU976149 | CA010817 |
| DW015726 | BF519086 | CF921875 | CX547709 | BU976156 | CA010817 |
| DW015726 | BF519276 | CF921932 | BQ610452 | BU976228 | CK124350 |
| DW015726 | BF519361 | CF921948 | AW458115 | BU976230 | AL511051 |
| DW015726 | BI311999 | CF921948 | AW733234 | BU976230 | CB876133 |
| DW015738 | BF519778 | CF921948 | AW733441 | BU976231 | AL504078 |
| DW015818 | BG644861 | CF921948 | BE211347 | BU976231 | AL507779 |
| DW015823 | BE942814 | CF921948 | BI975082 | BU976231 | AL511051 |
| DW015860 | BI307997 | CF921948 | BQ080536 | BU976231 | BU983898 |
| DW015875 | BE942814 | CF921948 | BQ080772 | BU976231 | BU999349 |
| DW016016 | CB891195 | CF921948 | BQ080897 | BU976231 | CA033007 |
| DW016029 | CF067928 | CF921948 | BQ081524 | BU976245 | AL507953 |
| DW016173 | DW018752 | CF921948 | CF922340 | BU976283 | CB858262 |
| DW016179 | BF520970 | CF921966 | BM567949 | BU976324 | CA004907 |
| DW016201 | CA918296 | CF922040 | AW459538 | BU976324 | CB881140 |
| DW016225 | BF003547 | CF922041 | CX701374 | BU976468 | BU983898 |
| DW016225 | BG644478 | CF922091 | BG551161 | BU976468 | BU998845 |
| DW016231 | BG648108 | CF922099 | BI786851 | BU976468 | CA022372 |
| DW016231 | CF068991 | CF922106 | BI786851 | BU976468 | CA031556 |
| DW016231 | DW019018 | CF922106 | CF922075 | BU976468 | CB876211 |
| DW016247 | BI309115 | CF922155 | CF921640 | BU976468 | CB876512 |
| DW016369 | CB891550 | CF922155 | CF922942 | BU976522 | AL511051 |
| DW016425 | BE124043 | CF922163 | BF066983 | BU976522 | CB876133 |
| DW016436 | BG646289 | CF922163 | BG550942 | BU976523 | AL511051 |
| DW016441 | AW560413 | CF922163 | BI321393 | BU976882 | AL501419 |
| DW016441 | CA921114 | CF922163 | BI426291 | BU977006 | AL501419 |
| DW016529 | BE204759 | CF922163 | BM187687 | BU977006 | BU999349 |
| DW016545 | AW776022 | CF922163 | BM188833 | BU977006 | CA031556 |
| DW016545 | AW981163 | CF922163 | BQ627788 | BU977101 | BQ659892 |
| DW016545 | BG583655 | CF922163 | BQ786068 | BU977101 | BU995341 |
| DW016545 | DW015880 | CF922163 | BU577148 | BU977101 | BU996263 |
| DW016545 | DW016722 | CF922163 | BU578775 | BU977102 | BQ659892 |

|          |          |          |          |          |          |
|----------|----------|----------|----------|----------|----------|
| DW016558 | AW981221 | CF922163 | BU762355 | BU977137 | AL511051 |
| DW016558 | CF068052 | CF922163 | BU765062 | BU977137 | CB876133 |
| DW016573 | DW017307 | CF922175 | BI786851 | BU977237 | CA014412 |
| DW016573 | DW018553 | CF922238 | CF922942 | BU977278 | BQ656532 |
| DW016622 | CA917986 | CF922238 | CF923145 | BU977278 | BU983282 |
| DW016663 | BE998958 | CF922246 | BG550942 | BU977297 | BU999349 |
| DW016670 | BF518448 | CF922246 | BI321393 | BU977297 | CA031468 |
| DW016684 | AW775726 | CF922246 | BI426291 | BU977297 | CA031556 |
| DW016684 | AW776458 | CF922246 | BM187687 | BU977297 | CA033007 |
| DW016684 | BE124070 | CF922246 | BM188833 | BU977298 | BU983898 |
| DW016684 | BG646321 | CF922246 | BQ627788 | BU977298 | CA022372 |
| DW016684 | CF068012 | CF922246 | BQ786068 | BU977298 | CA031556 |
| DW016684 | DW016811 | CF922246 | BU577148 | BU977396 | AL511051 |
| DW016740 | DW017422 | CF922246 | BU578775 | BU977396 | CB876318 |
| DW016769 | AW268041 | CF922246 | BU762355 | BU977422 | BQ458407 |
| DW016769 | AW585330 | CF922246 | BU765062 | BU977422 | BQ460814 |
| DW016769 | AW773867 | CF922284 | AI965662 | BU977422 | BQ657242 |
| DW016769 | BE203598 | CF922291 | BQ741935 | BU977422 | BQ658205 |
| DW016769 | BE203925 | CF922300 | BG551161 | BU977422 | BU976089 |
| DW016769 | BE205399 | CF922311 | BU082917 | BU977422 | BU981041 |
| DW016769 | BE942681 | CF922418 | CX706596 | BU977422 | CA015747 |
| DW016769 | BF004418 | CF922656 | CX708023 | BU977422 | CA018236 |
| DW016769 | BG588699 | CF922663 | BI321500 | BU977422 | CA020746 |
| DW016769 | BG645946 | CF922711 | AW432971 | BU977422 | CA030431 |
| DW016769 | BG647057 | CF922769 | BE330292 | BU977422 | CA030974 |
| DW016769 | BG647871 | CF922841 | BI786851 | BU977422 | CB858781 |
| DW016769 | BG649034 | CF922866 | CF922717 | BU977422 | CB875558 |
| DW016769 | BI308026 | CF922869 | BG551161 | BU977422 | CB876285 |
| DW016769 | BI308169 | CF922990 | CF922348 | BU977422 | CB877001 |
| DW016769 | BI308181 | CF923002 | BI786851 | BU977423 | BQ458407 |
| DW016769 | BI308292 | CF923096 | BI786851 | BU977423 | BQ460814 |
| DW016769 | BI308913 | CF923110 | AI960525 | BU977423 | BU999456 |
| DW016769 | BI309964 | CF923110 | BM523004 | BU977423 | CA023485 |
| DW016769 | BI311383 | CF923110 | BM523026 | BU977423 | CB858571 |
| DW016769 | BI311842 | CF923110 | BM523096 | BU977603 | CA012726 |
| DW016769 | BI311988 | CF923110 | BM523143 | BU977624 | BE421883 |
| DW016769 | BM779774 | CF923110 | BM523171 | BU977624 | BQ459517 |
| DW016769 | CA917281 | CF923110 | BM523238 | BU977624 | BQ459912 |
| DW016769 | CA917531 | CF923110 | CF922053 | BU977624 | BQ460348 |
| DW016769 | CA917595 | CF923110 | CX702051 | BU977624 | BQ469610 |
| DW016769 | CA917759 | CF923110 | CX702223 | BU977624 | BQ664950 |
| DW016769 | CA918363 | CF923110 | CX702539 | BU977624 | BQ665658 |
| DW016769 | CA922476 | CF923110 | CX705616 | BU977624 | BU977865 |
| DW016769 | CA990566 | CF923110 | CX705890 | BU977624 | BU978450 |
| DW016769 | CA991312 | CO036164 | BU082635 | BU977624 | BU978835 |
| DW016769 | CB066677 | CO036164 | BU578002 | BU977624 | BU981313 |
| DW016769 | CB892907 | CO036185 | BF324531 | BU977624 | BU983268 |
| DW016769 | DW017338 | CO036250 | CO036114 | BU977624 | BU999624 |
| DW016800 | BF519156 | CO036363 | AW459711 | BU977624 | CA019779 |
| DW016821 | BE124893 | CO036363 | BQ628370 | BU977624 | CA021452 |
| DW016848 | CA918296 | CO036363 | BQ785873 | BU977624 | CA030247 |
| DW016893 | BF518800 | CO036365 | AW311366 | BU977624 | CA030515 |



|          |          |          |          |          |          |
|----------|----------|----------|----------|----------|----------|
| DW016893 | BF519763 | CO036420 | BM887269 | BU977624 | CA030714 |
| DW016901 | AI974312 | CO036442 | BM187646 | BU977624 | CA030781 |
| DW016901 | AW267962 | CO036547 | AW311366 | BU977624 | CA031592 |
| DW016901 | CB892060 | CX546948 | BQ627722 | BU977624 | CB874850 |
| DW016905 | AW560420 | CX546957 | BE330569 | BU977624 | CB875196 |
| DW016906 | AW981124 | CX546957 | BF071146 | BU977624 | CK123220 |
| DW016926 | AI974751 | CX546957 | BG550571 | BU977749 | AL511051 |
| DW016965 | BE124321 | CX546957 | BU080731 | BU977749 | CB876133 |
| DW016965 | BG646191 | CX546957 | BU578411 | BU977749 | CB876512 |
| DW016965 | CB891761 | CX546957 | CX546983 | BU977750 | BU999349 |
| DW017020 | BF520671 | CX546957 | CX547601 | BU977750 | CA031468 |
| DW017051 | DW015224 | CX546985 | CX547362 | BU977750 | CA031556 |
| DW017110 | AW208054 | CX547058 | BQ629426 | BU977750 | CA033007 |
| DW017110 | AW560410 | CX547120 | AW156145 | BU977750 | CB876133 |
| DW017110 | AW561024 | CX547120 | AW733495 | BU977836 | AL503078 |
| DW017110 | AW776176 | CX547120 | BG726352 | BU977836 | AL505955 |
| DW017110 | AW776771 | CX547120 | BQ081408 | BU977836 | AL510154 |
| DW017110 | BE998747 | CX547120 | BQ786180 | BU977836 | AL511532 |
| DW017110 | BF005901 | CX547120 | CX704290 | BU977836 | BQ459912 |
| DW017110 | BF519374 | CX547120 | CX708338 | BU977836 | BQ460348 |
| DW017110 | BF519523 | CX547202 | AW394305 | BU977836 | BQ460440 |
| DW017110 | BF520429 | CX547215 | CX702244 | BU977836 | BQ469610 |
| DW017110 | BG581838 | CX547283 | BQ742702 | BU977836 | BQ471023 |
| DW017110 | BG645454 | CX547321 | CX708850 | BU977836 | BQ471052 |
| DW017110 | BM779845 | CX547397 | CX702166 | BU977836 | BQ656287 |
| DW017110 | BQ255148 | CX547407 | BE059242 | BU977836 | BQ657048 |
| DW017110 | CB893143 | CX547546 | BF071246 | BU977836 | BQ657174 |
| DW017114 | CB892634 | CX547571 | BI974955 | BU977836 | BQ660439 |
| DW017148 | AI974751 | CX547701 | CX548177 | BU977836 | BQ664950 |
| DW017154 | AW776843 | CX547757 | BQ628036 | BU977836 | BQ665658 |
| DW017174 | BI309115 | CX547847 | BM891127 | BU977836 | BQ665694 |
| DW017192 | AW981268 | CX547901 | CX547952 | BU977836 | BU977865 |
| DW017192 | BF005101 | CX547925 | CX708097 | BU977836 | BU978450 |
| DW017192 | BF005694 | CX547956 | BG550681 | BU977836 | BU978785 |
| DW017254 | BE124669 | CX547956 | BQ629160 | BU977836 | BU978835 |
| DW017254 | BE997407 | CX547976 | CX706440 | BU977836 | BU979676 |
| DW017254 | BE998519 | CX548049 | CX707048 | BU977836 | BU981489 |
| DW017254 | BG582535 | CX548095 | BG363104 | BU977836 | BU981851 |
| DW017254 | BG648401 | CX548100 | BQ610129 | BU977836 | BU982343 |
| DW017304 | BF518924 | CX548219 | CX547525 | BU977836 | BU982479 |
| DW017363 | CA991042 | CX548222 | BM567831 | BU977836 | BU983268 |
| DW017466 | BE998754 | CX548347 | BQ610129 | BU977836 | BU983327 |
| DW017500 | BF006498 | CX548389 | BQ740824 | BU977836 | BU999624 |
| DW017503 | BE124783 | CX548466 | BI972292 | BU977836 | CA022784 |
| DW017538 | BF005671 | CX548506 | CX548401 | BU977836 | CA030247 |
| DW017538 | BF520895 | CX548606 | BU762279 | BU977836 | CA030665 |
| DW017538 | BF521111 | CX548641 | BQ628298 | BU977836 | CA030714 |
| DW017538 | CF068242 | CX548677 | BE191040 | BU977836 | CA030781 |
| DW017579 | AW736555 | CX548810 | BE330569 | BU977836 | CA031457 |
| DW017591 | BF004595 | CX548810 | BF071146 | BU977836 | CA032239 |
| DW017614 | CB894487 | CX548810 | BG550571 | BU977836 | CK123220 |
| DW017640 | BG646915 | CX548810 | BU080731 | BU977889 | CK123004 |

|          |          |          |          |          |          |
|----------|----------|----------|----------|----------|----------|
| DW017640 | BI309201 | CX548810 | BU578411 | BU977930 | CA002571 |
| DW017712 | CB894168 | CX548810 | CX546983 | BU977931 | CA010817 |
| DW017738 | CB891276 | CX548810 | CX547601 | BU977982 | AL501419 |
| DW017739 | CB894168 | CX548854 | BQ612063 | BU977982 | CB876133 |
| DW017760 | BG581425 | CX548875 | BG363079 | BU977982 | CB876318 |
| DW017760 | CF069434 | CX548941 | CF923127 | BU978001 | AL506541 |
| DW017770 | BG648736 | CX549016 | BQ785475 | BU978001 | AL507569 |
| DW017785 | BI309504 | CX549069 | AW459422 | BU978001 | BQ459572 |
| DW017853 | BI310879 | CX549069 | AW705716 | BU978001 | BQ459876 |
| DW017865 | CA919030 | CX549069 | BE022813 | BU978001 | BQ656834 |
| DW017907 | DW015184 | CX549069 | BG511526 | BU978001 | BQ657352 |
| DW017907 | DW015709 | CX549077 | CX703480 | BU978001 | BQ657914 |
| DW017915 | AW560420 | CX700910 | CX711031 | BU978001 | BQ660302 |
| DW017953 | DW017912 | CX700983 | BQ611916 | BU978001 | BU982417 |
| DW018017 | BG581972 | CX700984 | BQ786706 | BU978001 | BU983310 |
| DW018017 | CA919999 | CX700994 | CF922575 | BU978001 | CA004193 |
| DW018113 | BE203088 | CX701037 | BE329764 | BU978001 | CA016942 |
| DW018141 | BE997470 | CX701132 | BI894056 | BU978001 | CA017121 |
| DW018141 | CF069871 | CX701137 | BM887269 | BU978001 | CA022981 |
| DW018181 | BI309410 | CX701169 | BU578038 | BU978001 | CA026426 |
| DW018181 | DW016705 | CX701204 | CX701408 | BU978001 | CA028428 |
| DW018216 | BI309504 | CX701207 | AI939225 | BU978001 | CB874401 |
| DW018230 | BF519797 | CX701207 | AW395080 | BU978001 | CB875673 |
| DW018315 | BG646316 | CX701207 | BE330164 | BU978001 | CB876195 |
| DW018433 | BG646447 | CX701207 | BF425383 | BU978001 | CB876373 |
| DW018463 | BE998958 | CX701207 | BQ079602 | BU978001 | CK122902 |
| DW018471 | AW980675 | CX701225 | AW156610 | BU978001 | CK122978 |
| DW018477 | AW980338 | CX701264 | CX702701 | BU978001 | CK124210 |
| DW018477 | BM779339 | CX701271 | BG363068 | BU978001 | CK125912 |
| DW018477 | BM779751 | CX701296 | CX702166 | BU978002 | AL500668 |
| DW018594 | DW018154 | CX701296 | CX702417 | BU978002 | AL505071 |
| DW018673 | BE204745 | CX701429 | AW458086 | BU978002 | AL507569 |
| DW018673 | BE239351 | CX701431 | BM091663 | BU978002 | BQ458704 |
| DW018741 | DW017307 | CX701441 | CX709508 | BU978002 | BQ458957 |
| DW018741 | DW018553 | CX701444 | BI946093 | BU978002 | BQ459572 |
| DW018755 | BE124669 | CX701525 | AW459538 | BU978002 | BQ459823 |
| DW018755 | BE997407 | CX701555 | AW311277 | BU978002 | BQ460007 |
| DW018755 | BE998519 | CX701590 | CX702336 | BU978002 | BQ460403 |
| DW018755 | BE998989 | CX701663 | BQ612340 | BU978002 | BQ460409 |
| DW018755 | BG582535 | CX701760 | BQ742702 | BU978002 | BQ460424 |
| DW018755 | BG648401 | CX701773 | AW396394 | BU978002 | BQ460612 |
| DW018761 | BG648112 | CX701857 | AI965449 | BU978002 | BQ460708 |
| DW018780 | BE204955 | CX701994 | AI965662 | BU978002 | BQ460818 |
| DW018833 | BE203171 | CX702035 | BQ742702 | BU978002 | BQ460835 |
| DW018843 | BG648876 | CX702048 | BQ629867 | BU978002 | BQ469974 |
| DW018843 | BI308751 | CX702092 | AW306298 | BU978002 | BQ471006 |
| DW018925 | DW016842 | CX702137 | BQ629394 | BU978002 | BQ656566 |
| DW018935 | BQ255291 | CX702158 | BM188127 | BU978002 | BQ656653 |
| DW018961 | BE942709 | CX702219 | CX547362 | BU978002 | BQ656926 |
| DW018981 | BE942814 | CX702356 | AW395247 | BU978002 | BQ657539 |
| DW018981 | CF069580 | CX702356 | BE330569 | BU978002 | BQ657824 |
| DW018983 | DW017422 | CX702356 | BF071146 | BU978002 | BQ657854 |

|                  |             |          |          |          |          |
|------------------|-------------|----------|----------|----------|----------|
| DW019026         | BI309504    | CX702356 | BI426317 | BU978002 | BQ657914 |
| DW019037         | CB891852    | CX702356 | BM092574 | BU978002 | BQ658137 |
| DW019037         | DW017945    | CX702356 | BU578411 | BU978002 | BQ664866 |
| DW019126         | BE203129    | CX702356 | CX546983 | BU978002 | BU976671 |
| DW019130         | DW017945    | CX702356 | CX547601 | BU978002 | BU976733 |
| DW019134         | AW776896    | CX702356 | CX711645 | BU978002 | BU976782 |
| DW019141         | BE240329    | CX702405 | CX704935 | BU978002 | BU977157 |
| DW019141         | CB894115    | CX702445 | BQ629394 | BU978002 | BU978140 |
| DW019201         | BE203808    | CX702445 | BQ629566 | BU978002 | BU978591 |
| DW019204         | CA919030    | CX702467 | AW459538 | BU978002 | BU978702 |
| DW019222         | DW017422    | CX702535 | CX547362 | BU978002 | BU978966 |
| DW019242         | AW776947    | CX702535 | CX547714 | BU978002 | BU979281 |
| DW019242         | DW018416    | CX702588 | BI974955 | BU978002 | BU979289 |
| DW019256         | BG648695    | CX702647 | BM188351 | BU978002 | BU980385 |
| DW019286         | AW299167    | CX702669 | BG726551 | BU978002 | BU980421 |
| DW019286         | DW015445    | CX702747 | CX703442 | BU978002 | BU980527 |
| DW019298         | BG647965    | CX702764 | CX548643 | BU978002 | BU980695 |
| DW019386         | CA923087    | CX702783 | AW459442 | BU978002 | BU980924 |
| <i>Malus dom</i> | royal gala  | CX702783 | BQ742681 | BU978002 | BU981215 |
| <b>EST1</b>      | <b>EST2</b> | CX702803 | BG550664 | BU978002 | BU981270 |
| CN848742         | CN874151    | CX702876 | BG551142 | BU978002 | BU981875 |
| CN848742         | CN948401    | CX702906 | BM886262 | BU978002 | BU982074 |
| CN848945         | CN906475    | CX702906 | CX709464 | BU978002 | BU982625 |
| CN849021         | CN947550    | CX702939 | BQ628627 | BU978002 | BU983143 |
| CN849100         | CN940596    | CX702992 | BF071352 | BU978002 | BU983277 |
| CN849170         | CN890134    | CX702992 | CX707085 | BU978002 | BU983289 |
| CN849170         | CN891430    | CX703006 | CX708421 | BU978002 | BU983508 |
| CN849170         | CN894402    | CX703030 | BM188325 | BU978002 | BU994917 |
| CN849170         | CN906559    | CX703050 | BI426106 | BU978002 | BU997068 |
| CN849170         | CN919462    | CX703064 | BI787795 | BU978002 | BU998919 |
| CN849176         | CN851905    | CX703126 | BM886877 | BU978002 | BU998979 |
| CN849176         | CN864970    | CX703241 | BM271030 | BU978002 | BU999705 |
| CN849176         | CN865133    | CX703243 | BM891131 | BU978002 | CA009686 |
| CN849176         | CN890134    | CX703291 | BQ740540 | BU978002 | CA012538 |
| CN849176         | CN890460    | CX703294 | BQ611079 | BU978002 | CA013768 |
| CN849176         | CN891218    | CX703371 | CX709262 | BU978002 | CA018287 |
| CN849286         | CN848778    | CX703534 | CX711031 | BU978002 | CA020546 |
| CN849286         | CN851594    | CX703585 | BG511790 | BU978002 | CA022981 |
| CN849286         | CN888038    | CX703586 | CX547626 | BU978002 | CA024093 |
| CN849286         | CN890134    | CX703590 | BQ613059 | BU978002 | CA024571 |
| CN849286         | CN891218    | CX703684 | CX708961 | BU978002 | CA026386 |
| CN849286         | CN901764    | CX703684 | CX709262 | BU978002 | CA026759 |
| CN849286         | CN906559    | CX703698 | BG550681 | BU978002 | CA027857 |
| CN849286         | CN942163    | CX703698 | BQ629160 | BU978002 | CA029184 |
| CN849286         | CN949198    | CX703768 | BG363104 | BU978002 | CA029923 |
| CN849417         | CN850694    | CX703786 | BG352137 | BU978002 | CA030343 |
| CN849417         | CN851880    | CX703790 | AW396394 | BU978002 | CA030969 |
| CN849593         | CN863470    | CX703790 | CX707048 | BU978002 | CA030993 |
| CN849593         | CN864266    | CX703992 | BQ629353 | BU978002 | CA031099 |
| CN849657         | CN901949    | CX704094 | BQ610522 | BU978002 | CA031585 |
| CN849672         | CN848778    | CX704117 | BQ629715 | BU978002 | CA031751 |
| CN849672         | CN849007    | CX704118 | CX704742 | BU978002 | CA031767 |

|          |          |          |          |          |          |
|----------|----------|----------|----------|----------|----------|
| CN849672 | CN849952 | CX704142 | BE024035 | BU978002 | CA032038 |
| CN849672 | CN888038 | CX704194 | BE022926 | BU978002 | CA032080 |
| CN849672 | CN890134 | CX704194 | BE058735 | BU978002 | CA032305 |
| CN849672 | CN890460 | CX704194 | BI423936 | BU978002 | CA032385 |
| CN849672 | CN891218 | CX704194 | CX707120 | BU978002 | CA032666 |
| CN849672 | CN901764 | CX704332 | AI965662 | BU978002 | CB874350 |
| CN849672 | CN903589 | CX704369 | CF922575 | BU978002 | CB874923 |
| CN849672 | CN906559 | CX704383 | BQ786706 | BU978002 | CB875075 |
| CN849672 | CN942163 | CX704391 | BQ610522 | BU978002 | CB875427 |
| CN849672 | CN949198 | CX704454 | BE058694 | BU978002 | CB875527 |
| CN849929 | EB117757 | CX704538 | BM887060 | BU978002 | CB875673 |
| CN849929 | EB136403 | CX704538 | BQ299041 | BU978002 | CB875741 |
| CN850022 | CN901949 | CX704561 | BF324318 | BU978002 | CB876245 |
| CN850026 | CN901949 | CX704607 | CX707286 | BU978002 | CB876333 |
| CN850035 | CN882305 | CX704607 | CX707479 | BU978002 | CB876354 |
| CN850255 | CN901949 | CX704628 | BQ741802 | BU978002 | CB876616 |
| CN850291 | EB119560 | CX704632 | BQ612063 | BU978002 | CB876656 |
| CN850291 | EB120307 | CX704641 | CX548063 | BU978002 | CB880962 |
| CN850291 | EB124113 | CX704728 | BG363079 | BU978002 | CK122018 |
| CN850291 | EB131765 | CX704761 | BE330432 | BU978002 | CK122098 |
| CN850291 | EB133622 | CX704794 | BG726598 | BU978002 | CK122242 |
| CN850291 | EB134458 | CX704872 | AI416731 | BU978002 | CK122275 |
| CN850291 | EB136501 | CX704967 | CX702187 | BU978002 | CK122360 |
| CN850291 | EB136941 | CX705041 | BI894056 | BU978002 | CK122799 |
| CN850307 | CN848778 | CX705053 | AI416731 | BU978002 | CK122974 |
| CN850307 | CN849007 | CX705127 | BI786851 | BU978002 | CK122978 |
| CN850307 | CN849952 | CX705192 | BE058694 | BU978002 | CK123107 |
| CN850307 | CN890134 | CX705210 | AW432821 | BU978002 | CK123695 |
| CN850307 | CN890460 | CX705385 | AW396394 | BU978002 | CK124114 |
| CN850307 | CN901764 | CX705393 | BU577227 | BU978002 | CK124210 |
| CN850307 | CN903589 | CX705425 | CX708097 | BU978002 | CK124486 |
| CN850307 | CN906559 | CX705432 | CX703480 | BU978002 | CK124903 |
| CN850307 | CN949198 | CX705673 | CX705094 | BU978002 | CK125593 |
| CN850375 | CN901949 | CX705818 | CF922421 | BU978002 | CK125702 |
| CN850409 | CN851860 | CX706015 | BF071352 | BU978002 | CK125844 |
| CN850409 | CN939249 | CX706015 | CX706935 | BU978519 | CB876512 |
| CN850409 | CN940951 | CX706015 | CX707085 | BU978599 | BU977643 |
| CN850409 | CN942096 | CX706040 | CX547614 | BU978616 | CB876318 |
| CN850501 | CN849249 | CX706070 | AI966698 | BU978631 | BU999349 |
| CN850501 | CN851317 | CX706102 | BI787795 | BU978671 | BQ656997 |
| CN850501 | CN868449 | CX706134 | BE022867 | BU978671 | BQ656999 |
| CN850697 | CN901949 | CX706197 | CO036522 | BU978671 | BU997544 |
| CN850760 | CN901949 | CX706201 | BM891127 | BU978671 | CA018236 |
| CN850797 | CN939633 | CX706590 | BI786851 | BU978671 | CA032317 |
| CN850862 | CN851880 | CX706590 | CF922075 | BU978671 | CB858571 |
| CN850871 | CN849583 | CX706665 | BE023397 | BU978671 | CB858866 |
| CN850871 | CN850932 | CX706850 | BG725879 | BU978671 | CB876285 |
| CN850871 | CN851374 | CX706850 | CX705239 | BU978698 | CA029934 |
| CN850875 | CN863470 | CX706903 | BE059753 | BU978804 | BU978838 |
| CN850875 | CN864266 | CX706903 | BE330381 | BU978804 | BU979648 |
| CN850944 | CN934138 | CX706903 | BQ742581 | BU978804 | CA032285 |
| CN850952 | CN901474 | CX706953 | BM891127 | BU978804 | CK122451 |

|          |          |          |          |          |          |
|----------|----------|----------|----------|----------|----------|
| CN850952 | CN934138 | CX706990 | CX702279 | BU978822 | CA014652 |
| CN850957 | CN936220 | CX707028 | CX705239 | BU978854 | CA028561 |
| CN850994 | CN881615 | CX707053 | BE059753 | BU978912 | CA020051 |
| CN851011 | CN934138 | CX707053 | BE330381 | BU978953 | AL508642 |
| CN851041 | CN888038 | CX707053 | BQ742581 | BU978953 | BQ458641 |
| CN851041 | CN890134 | CX707161 | BU082917 | BU978953 | BQ459000 |
| CN851041 | CN891218 | CX707176 | CX706397 | BU978953 | BU982049 |
| CN851041 | CN906559 | CX707217 | AW705544 | BU978953 | BU995542 |
| CN851041 | CN942163 | CX707235 | AI965662 | BU978953 | BU997686 |
| CN851041 | CN949198 | CX707285 | CX706470 | BU978953 | CA012785 |
| CN851257 | EB136414 | CX707306 | CF922136 | BU978953 | CA030315 |
| CN851259 | CN850273 | CX707308 | CX702187 | BU978953 | CA032104 |
| CN851279 | CN892243 | CX707310 | CX703501 | BU978953 | CK124130 |
| CN851281 | CN848778 | CX707327 | BQ741738 | BU978953 | CK125130 |
| CN851281 | CN851594 | CX707346 | BQ080106 | BU978961 | AL507903 |
| CN851281 | CN863949 | CX707425 | BU762412 | BU978961 | BU977429 |
| CN851281 | CN901764 | CX707430 | CF923127 | BU978961 | BU977515 |
| CN851281 | CN906559 | CX707454 | CX706470 | BU978961 | BU998245 |
| CN851281 | CN949198 | CX707488 | CF922129 | BU978961 | CA022781 |
| CN851304 | CN888038 | CX707488 | CF922205 | BU978961 | CA026486 |
| CN851304 | CN890134 | CX707488 | CX709502 | BU978961 | CA031231 |
| CN851304 | CN891218 | CX707500 | BQ454244 | BU978961 | CB860148 |
| CN851304 | CN906559 | CX707569 | AI899872 | BU978961 | CB875796 |
| CN851304 | CN942163 | CX707569 | BQ785165 | BU979050 | AL511051 |
| CN851304 | CN949198 | CX707569 | BU578217 | BU979050 | BU983898 |
| CN851386 | EB157493 | CX707569 | BU762091 | BU979050 | CA031556 |
| CN851392 | CN850694 | CX707569 | CX710272 | BU979050 | CB876133 |
| CN851570 | CN907153 | CX707597 | BU762412 | BU979050 | CB876211 |
| CN851570 | CN919342 | CX707626 | CF923127 | BU979050 | CB876512 |
| CN851570 | EB147817 | CX707653 | CX703501 | BU979053 | CB876512 |
| CN851615 | CN901949 | CX707660 | CX703026 | BU979177 | BU983762 |
| CN851617 | CN895930 | CX707660 | CX709502 | BU979241 | BU979869 |
| CN851684 | EB127608 | CX707709 | BE329764 | BU979241 | BU980458 |
| CN851684 | EB135387 | CX707718 | BI426106 | BU979269 | BQ465065 |
| CN851684 | EB136414 | CX707850 | AW459422 | BU979368 | CA012707 |
| CN851718 | CN848778 | CX707889 | CX547952 | BU979376 | AL511051 |
| CN851718 | CN849007 | CX707946 | CX548409 | BU979388 | BQ460282 |
| CN851718 | CN849952 | CX707959 | CX707286 | BU979388 | CA022372 |
| CN851718 | CN890134 | CX707959 | CX707479 | BU979388 | CB876318 |
| CN851718 | CN890460 | CX707959 | CX710632 | BU979429 | AL511051 |
| CN851718 | CN891430 | CX708018 | BG352817 | BU979462 | BQ460282 |
| CN851718 | CN894402 | CX708098 | BG363021 | BU979462 | BU983898 |
| CN851718 | CN901764 | CX708098 | CX711592 | BU979462 | BU999349 |
| CN851718 | CN903589 | CX708171 | BG550571 | BU979462 | CA031556 |
| CN851718 | CN906559 | CX708171 | BU080731 | BU979462 | CB876211 |
| CN851718 | CN919462 | CX708248 | CX708097 | BU979462 | CB876318 |
| CN851718 | CN949198 | CX708274 | CX709338 | BU979462 | CB876512 |
| CN851727 | CN848778 | CX708398 | BU082917 | BU979553 | BU999349 |
| CN851727 | CN849007 | CX708489 | CX707286 | BU979553 | CA031468 |
| CN851727 | CN849952 | CX708595 | BQ080900 | BU979553 | CA031556 |
| CN851727 | CN890134 | CX708773 | BQ628920 | BU979553 | CA033007 |
| CN851727 | CN890460 | CX708894 | BQ627506 | BU979553 | CB876133 |

|          |          |          |          |          |          |
|----------|----------|----------|----------|----------|----------|
| CN851727 | CN901764 | CX708920 | CX707535 | BU979612 | BU999106 |
| CN851727 | CN903589 | CX708943 | BM522677 | BU979612 | CK122177 |
| CN851727 | CN906559 | CX709215 | BU578233 | BU979629 | BQ459912 |
| CN851727 | CN949198 | CX709262 | BQ298518 | BU979629 | BQ460348 |
| CN851759 | CN936220 | CX709359 | AI965662 | BU979629 | BQ664950 |
| CN851804 | CN888038 | CX709382 | BQ612340 | BU979629 | BQ665658 |
| CN851804 | CN890134 | CX709415 | CX707825 | BU979629 | BU978450 |
| CN851804 | CN891218 | CX709423 | BG362912 | BU979629 | BU978785 |
| CN851804 | CN906559 | CX709467 | BQ741420 | BU979629 | BU978835 |
| CN851804 | CN942163 | CX709514 | CX706596 | BU979629 | BU983223 |
| CN851804 | CN949198 | CX709682 | BQ741420 | BU979629 | BU983268 |
| CN851911 | CN942472 | CX709812 | BE190933 | BU979629 | BU999624 |
| CN851930 | CN868730 | CX709890 | BI787857 | BU979629 | CA030247 |
| CN855422 | CN866854 | CX709890 | BQ611271 | BU979629 | CA030714 |
| CN855422 | CN867246 | CX710012 | CX547525 | BU979629 | CB874850 |
| CN856754 | CN922363 | CX710012 | CX706440 | BU979689 | BU977429 |
| CN856984 | EB114180 | CX710095 | BM567831 | BU979689 | BU998245 |
| CN859858 | EB113831 | CX710146 | CX706657 | BU979689 | CB860148 |
| CN860195 | CN904318 | CX710183 | BM887269 | BU979691 | CA002571 |
| CN860880 | EB128707 | CX710216 | CX704212 | BU979707 | CK124621 |
| CN860911 | EB128707 | CX710221 | BE058938 | BU979832 | CA002571 |
| CN861032 | CN875283 | CX710335 | BM891262 | BU979865 | CA012707 |
| CN862103 | CN905327 | CX710449 | CX706657 | BU979956 | AL507953 |
| CN862103 | CN942376 | CX710495 | BE058938 | BU980024 | AL508245 |
| CN862114 | EB149305 | CX710562 | BF071246 | BU980024 | BQ656564 |
| CN862132 | CN862786 | CX710806 | BQ612340 | BU980024 | BQ666018 |
| CN862160 | CN848778 | CX710832 | AI965662 | BU980024 | BU976453 |
| CN862160 | CN851594 | CX711037 | BG511338 | BU980024 | CA020492 |
| CN862160 | CN863949 | CX711037 | BI786946 | BU980024 | CA025867 |
| CN862160 | CN890134 | CX711078 | CX707286 | BU980024 | CA026206 |
| CN862160 | CN891430 | CX711078 | CX710632 | BU980024 | CA028337 |
| CN862160 | CN894402 | CX711232 | BF324318 | BU980024 | CK124699 |
| CN862160 | CN901764 | CX711247 | BQ629760 | BU980132 | AL501419 |
| CN862160 | CN906559 | CX711319 | CX709338 | BU980132 | BU999349 |
| CN862160 | CN919462 | CX711333 | BM891127 | BU980132 | CA031468 |
| CN862160 | CN949198 | CX711341 | BQ785116 | BU980132 | CA031556 |
| CN862178 | CN891542 | CX711409 | BE330432 | BU980132 | CA033007 |
| CN862193 | CN901949 | CX711507 | AW459422 | BU980132 | CB876133 |
| CN862325 | CN902706 | CX711507 | AW705716 | BU980191 | BU996679 |
| CN862388 | CN878065 | CX711507 | BE022813 | BU980235 | AL506598 |
| CN862406 | CN884105 | CX711507 | BG511526 | BU980235 | AL508998 |
| CN862427 | CN901949 | CX711527 | AW311277 | BU980235 | BU979680 |
| CN862506 | CN865235 | CX711605 | BQ629614 | BU980235 | CA026778 |
| CN862599 | CN919236 | CX711645 | BQ627664 | BU980245 | AL501419 |
| CN862599 | CN939193 | CX711703 | BQ629614 | BU980256 | BQ657500 |
| CN862599 | CN947138 | CX711735 | AW099544 | BU980294 | AL511051 |
| CN862599 | EB124279 | CX711735 | BE023581 | BU980294 | CA033007 |
| CN862623 | CN890607 | CX711735 | BG726201 | BU980294 | CB876133 |
| CN862745 | CN892246 | CX711964 | CX547486 | BU980336 | BQ459627 |
| CN862756 | EB146734 | CX711989 | BU577106 | BU980336 | BQ657242 |
| CN862789 | CN851869 | CX712007 | AI965494 | BU980336 | BQ660796 |
| CN862789 | CN935802 | CX712116 | BG550571 | BU980336 | CA033016 |

|          |          |                |          |          |          |
|----------|----------|----------------|----------|----------|----------|
| CN862841 | CN874836 | CX712116       | BU080731 | BU980336 | CB858866 |
| CN862849 | CN901949 | CX712116       | BU578411 | BU980336 | CB875558 |
| CN862913 | CN901949 | CX712116       | CX546983 | BU980346 | CA009378 |
| CN863024 | CN862847 | CX712166       | AI965662 | BU980406 | AL506020 |
| CN863066 | CN874836 | CX712176       | AI965449 | BU980406 | AL507156 |
| CN863232 | CN871131 | CX712176       | AI965458 | BU980406 | BU998942 |
| CN863280 | EB146734 | <i>Lactuca</i> | salinas  | BU980406 | CA021773 |
| CN863339 | CN892246 | EST1           | EST2     | BU980406 | CA026112 |
| CN863421 | CN874836 | BQ843247       | BQ853182 | BU980406 | CA027165 |
| CN863512 | EB148425 | BQ843264       | DY967848 | BU980406 | CA032442 |
| CN863562 | CN851860 | BQ843264       | DY983217 | BU980406 | CK123774 |
| CN863562 | CN939249 | BQ843295       | BQ851791 | BU980414 | BQ465242 |
| CN863562 | CN940951 | BQ843295       | BQ860000 | BU980414 | CA009741 |
| CN863562 | CN942096 | BQ843295       | BQ871098 | BU980414 | CA025211 |
| CN863570 | EB146734 | BQ843295       | BQ872105 | BU980415 | CB876318 |
| CN863648 | CN944455 | BQ843295       | BQ876037 | BU980652 | BU976260 |
| CN863757 | CN892255 | BQ843354       | BQ867298 | BU980681 | AL507953 |
| CN863757 | CN894204 | BQ843473       | BQ848758 | BU980699 | AL511532 |
| CN863757 | CN906431 | BQ843475       | DY982205 | BU980699 | AL512099 |
| CN863786 | CN881615 | BQ843499       | BQ871430 | BU980699 | BQ458963 |
| CN863859 | CN851233 | BQ844012       | BQ844446 | BU980699 | BQ459912 |
| CN863859 | CN937596 | BQ844036       | DW126527 | BU980699 | BQ656287 |
| CN863859 | EB150410 | BQ844084       | DW124950 | BU980699 | BQ657174 |
| CN864129 | CN874836 | BQ844084       | DW129758 | BU980699 | BU977865 |
| CN864164 | EB146734 | BQ844157       | BQ874172 | BU980699 | BU979676 |
| CN864260 | CN891649 | BQ844228       | BQ875492 | BU980699 | BU981422 |
| CN864423 | CN874476 | BQ844229       | DY984409 | BU980699 | BU981851 |
| CN864531 | CN938983 | BQ844359       | BQ872728 | BU980699 | BU982981 |
| CN864563 | CN851508 | BQ844359       | BQ873379 | BU980699 | BU983268 |
| CN864563 | CN862980 | BQ844359       | BQ873411 | BU980699 | CA022784 |
| CN864563 | CN904673 | BQ844411       | BQ844446 | BU980699 | CA030247 |
| CN864638 | CN919636 | BQ844457       | BQ849562 | BU980699 | CA031457 |
| CN864875 | CN906089 | BQ844551       | BQ865422 | BU980699 | CA032928 |
| CN864875 | CN942376 | BQ844753       | DY979074 | BU980699 | CK122685 |
| CN864891 | CN862305 | BQ844865       | DW134569 | BU980699 | CK125455 |
| CN864891 | CN892347 | BQ844895       | DW126527 | BU980778 | CA015621 |
| CN864972 | CN848778 | BQ844943       | BQ872596 | BU980844 | BQ464934 |
| CN864972 | CN849007 | BQ844991       | BQ865422 | BU980853 | BQ467723 |
| CN864972 | CN849952 | BQ845035       | DW127229 | BU980979 | BQ460777 |
| CN864972 | CN890134 | BQ845205       | BQ867549 | BU981016 | CK122356 |
| CN864972 | CN890460 | BQ845205       | DW142792 | BU981128 | CA031468 |
| CN864972 | CN901764 | BQ845322       | BQ858336 | BU981128 | CA031556 |
| CN864972 | CN903589 | BQ845420       | BQ858088 | BU981128 | CA033007 |
| CN864972 | CN906559 | BQ845468       | BQ843624 | BU981128 | CB876133 |
| CN864972 | CN949198 | BQ845676       | BQ850441 | BU981194 | BU999349 |
| CN865106 | EB117515 | BQ845676       | DW124399 | BU981203 | BQ459148 |
| CN865106 | EB117554 | BQ845676       | DW124585 | BU981298 | AL511051 |
| CN865106 | EB117757 | BQ845676       | DW127569 | BU981298 | CA033007 |
| CN865106 | EB119560 | BQ845676       | DW127664 | BU981298 | CB876133 |
| CN865106 | EB130760 | BQ845676       | DW144163 | BU981342 | BU982093 |
| CN865106 | EB133030 | BQ845862       | BQ845860 | BU981482 | CA010558 |
| CN865106 | EB135869 | BQ846079       | BQ872873 | BU981506 | BU999349 |

|          |          |          |          |          |          |
|----------|----------|----------|----------|----------|----------|
| CN865106 | EB136149 | BQ846168 | DW126527 | BU981506 | CA031468 |
| CN865106 | EB136403 | BQ846171 | BQ858945 | BU981506 | CA031556 |
| CN865106 | EB136414 | BQ846301 | BQ871615 | BU981506 | CA033007 |
| CN865106 | EB136501 | BQ846543 | BQ875767 | BU981506 | CB876133 |
| CN865106 | EB138035 | BQ846933 | BQ864215 | BU981549 | BQ459627 |
| CN865106 | EB141905 | BQ846963 | BQ859616 | BU981549 | BQ657242 |
| CN865106 | EB144931 | BQ847077 | BQ872392 | BU981549 | BQ660796 |
| CN865106 | EB157154 | BQ847077 | BQ874938 | BU981549 | BU997210 |
| CN865148 | CN888316 | BQ847307 | BQ857890 | BU981549 | CA023581 |
| CN865339 | CN854601 | BQ847377 | BQ854273 | BU981549 | CA033016 |
| CN865735 | CN872884 | BQ847507 | BQ844741 | BU981549 | CB858866 |
| CN865910 | CN878065 | BQ847570 | BQ850258 | BU981549 | CB875558 |
| CN866114 | CN948890 | BQ847621 | DW127040 | BU981549 | CK124688 |
| CN866239 | EB147413 | BQ847772 | DY977523 | BU981549 | CK125157 |
| CN866363 | CN865138 | BQ847843 | BQ867298 | BU981669 | AL508104 |
| CN866367 | CN870494 | BQ848154 | BQ846792 | BU981760 | CK123004 |
| CN866449 | CN869241 | BQ848327 | BQ872596 | BU981828 | CA020051 |
| CN866449 | CN879921 | BQ848344 | DY960945 | BU981858 | CA015106 |
| CN866449 | CN943203 | BQ848503 | DY982205 | BU981893 | BQ657160 |
| CN866449 | CN945556 | BQ848524 | DY978540 | BU981893 | BQ657197 |
| CN866461 | CN870230 | BQ848606 | DW131008 | BU981893 | BQ657783 |
| CN866461 | CN870494 | BQ848606 | DW131824 | BU981893 | BQ657897 |
| CN866461 | CN879514 | BQ848606 | DW131902 | BU981893 | BQ661192 |
| CN866461 | CN943203 | BQ848693 | BQ845860 | BU981893 | BU983150 |
| CN866531 | CN868520 | BQ848759 | BQ855262 | BU981893 | BU995099 |
| CN866531 | CN870230 | BQ848843 | BQ856009 | BU981893 | CK123751 |
| CN866531 | CN870494 | BQ848865 | DY983693 | BU981893 | CK123794 |
| CN866531 | CN879514 | BQ849094 | DY984431 | BU981893 | CK123827 |
| CN866531 | CN940836 | BQ849108 | DY981332 | BU981893 | CK125728 |
| CN866531 | CN943203 | BQ849216 | BQ871053 | BU981931 | AL511314 |
| CN866538 | CN857056 | BQ849471 | DW128444 | BU981931 | BQ460138 |
| CN866588 | CN869241 | BQ849471 | DW131387 | BU981931 | BQ656715 |
| CN866588 | CN879921 | BQ849720 | BQ865504 | BU981931 | BQ656768 |
| CN866588 | CN883940 | BQ849721 | BQ858336 | BU981931 | BQ657880 |
| CN866588 | CN890972 | BQ849810 | BQ871053 | BU981931 | BQ657989 |
| CN866588 | CN940836 | BQ849846 | BQ863521 | BU981931 | BU976462 |
| CN866588 | CN947184 | BQ849877 | BQ870938 | BU981931 | BU976640 |
| CN866648 | CN907153 | BQ849888 | DY962817 | BU981931 | BU977874 |
| CN866648 | CN919229 | BQ849914 | BQ865551 | BU981931 | BU978116 |
| CN866648 | CN919342 | BQ849932 | DY960580 | BU981931 | BU978290 |
| CN866648 | CN940104 | BQ849958 | BQ873225 | BU981931 | BU978411 |
| CN866648 | EB147817 | BQ850012 | DY962347 | BU981931 | BU978905 |
| CN866648 | EB148112 | BQ850046 | DY961573 | BU981931 | BU980028 |
| CN866655 | CN901911 | BQ850182 | DY984843 | BU981931 | BU980460 |
| CN867378 | CN924669 | BQ850292 | BQ874210 | BU981931 | CK122226 |
| CN868129 | CN877803 | BQ850322 | BQ863521 | BU981931 | CK122875 |
| CN868138 | CN904432 | BQ850394 | BQ849597 | BU981931 | CK123425 |
| CN868138 | CN942377 | BQ850394 | BQ850236 | BU981931 | CK123942 |
| CN868138 | CN942559 | BQ850394 | BQ851641 | BU981931 | CK125035 |
| CN868145 | CN935467 | BQ850394 | BQ854132 | BU981931 | CK125069 |
| CN868153 | CN869241 | BQ850394 | BQ854295 | BU981970 | CB883595 |
| CN868153 | CN879921 | BQ850394 | BQ857310 | BU982034 | BQ470335 |



|          |          |          |          |          |          |
|----------|----------|----------|----------|----------|----------|
| CN868153 | CN943203 | BQ850394 | BQ858286 | BU982034 | BU994753 |
| CN868153 | CN945556 | BQ850394 | BQ860088 | BU982034 | BU999838 |
| CN868164 | CN880201 | BQ850394 | DW134630 | BU982034 | CA004468 |
| CN868164 | CN881335 | BQ850394 | DY981807 | BU982145 | CA031556 |
| CN868197 | CN869241 | BQ850421 | BQ858336 | BU982414 | BQ458407 |
| CN868197 | CN879921 | BQ850426 | BQ865551 | BU982414 | BQ459627 |
| CN868197 | CN883940 | BQ850444 | BQ852688 | BU982414 | BQ460814 |
| CN868197 | CN890972 | BQ850444 | BQ856641 | BU982414 | BQ656997 |
| CN868197 | CN940836 | BQ850444 | BQ859335 | BU982414 | BQ657242 |
| CN868197 | CN947184 | BQ850444 | BQ866699 | BU982414 | BQ660796 |
| CN868258 | CN880201 | BQ850444 | BQ869991 | BU982414 | BU979911 |
| CN868258 | CN941740 | BQ850444 | DW140342 | BU982414 | BU980036 |
| CN868313 | CN850513 | BQ850476 | BQ865551 | BU982414 | BU981041 |
| CN868313 | CN850597 | BQ850635 | BQ865551 | BU982414 | BU997210 |
| CN868313 | CN851771 | BQ850654 | BQ851825 | BU982414 | BU997544 |
| CN868313 | CN888959 | BQ850844 | BQ851998 | BU982414 | BU999456 |
| CN868313 | CN919690 | BQ850887 | BQ858542 | BU982414 | CA018236 |
| CN868352 | CN849249 | BQ850976 | BQ874699 | BU982414 | CA020746 |
| CN868352 | CN849439 | BQ851025 | BQ854247 | BU982414 | CA023485 |
| CN868352 | CN868449 | BQ851174 | BQ845860 | BU982414 | CA023581 |
| CN868352 | CN869130 | BQ851211 | BQ858336 | BU982414 | CA030974 |
| CN868352 | CN869860 | BQ851230 | DW127600 | BU982414 | CA032317 |
| CN868398 | CN869241 | BQ851230 | DW144893 | BU982414 | CA033016 |
| CN868398 | CN870119 | BQ851230 | DY972201 | BU982414 | CB858497 |
| CN868398 | CN879921 | BQ851230 | DY977747 | BU982414 | CB858866 |
| CN868398 | CN883940 | BQ851247 | BQ865551 | BU982414 | CB875022 |
| CN868398 | CN890972 | BQ851363 | BQ863521 | BU982414 | CB875558 |
| CN868398 | CN901911 | BQ851373 | BQ856455 | BU982414 | CB876285 |
| CN868398 | CN940836 | BQ851499 | BQ854427 | BU982414 | CK124363 |
| CN868398 | CN945556 | BQ851550 | BQ857082 | BU982414 | CK124688 |
| CN868398 | EB147178 | BQ851577 | BQ858077 | BU982414 | CK125157 |
| CN868404 | CN948720 | BQ851590 | BQ856945 | BU982494 | AL511051 |
| CN868486 | EB175256 | BQ851713 | BQ863009 | BU982494 | CA033007 |
| CN868508 | CN895339 | BQ851713 | DY982470 | BU982494 | CB876133 |
| CN868511 | CN894280 | BQ851839 | BQ856945 | BU982571 | AL506147 |
| CN868516 | CN870230 | BQ851927 | BQ851982 | BU982571 | BQ458579 |
| CN868526 | CN869241 | BQ851927 | DY961717 | BU982571 | BQ656564 |
| CN868526 | CN870494 | BQ852095 | BQ856945 | BU982571 | BU976453 |
| CN868526 | CN879921 | BQ852130 | BQ856455 | BU982571 | CA021167 |
| CN868526 | CN883940 | BQ852199 | BQ865551 | BU982571 | CA026943 |
| CN868526 | CN890504 | BQ852232 | BQ865551 | BU982574 | AL501912 |
| CN868526 | CN901911 | BQ852265 | BQ846587 | BU982574 | BQ656455 |
| CN868526 | CN945556 | BQ852333 | DY969048 | BU982574 | BQ656721 |
| CN868526 | EB147178 | BQ852435 | BQ858077 | BU982574 | BQ657352 |
| CN868618 | CN849249 | BQ852531 | BQ865551 | BU982574 | BQ657367 |
| CN868618 | CN849439 | BQ852709 | BQ867646 | BU982574 | BQ657824 |
| CN868618 | CN869860 | BQ852715 | DY970461 | BU982574 | BQ664666 |
| CN868653 | CN892094 | BQ852773 | BQ851825 | BU982574 | BU976040 |
| CN868927 | CN885304 | BQ852838 | BQ858542 | BU982574 | BU976671 |
| CN868927 | CN885318 | BQ852981 | BQ863260 | BU982574 | BU977157 |
| CN868927 | CN885472 | BQ852988 | BQ853104 | BU982574 | BU977378 |
| CN868927 | CN885742 | BQ853153 | BQ851388 | BU982574 | BU977522 |

|          |          |          |          |          |          |
|----------|----------|----------|----------|----------|----------|
| CN868927 | CN886567 | BQ853266 | DW138231 | BU982574 | BU978139 |
| CN868927 | CN893005 | BQ853300 | BQ856518 | BU982574 | BU978140 |
| CN868927 | CN893787 | BQ853361 | BQ849562 | BU982574 | BU978591 |
| CN868927 | CN901677 | BQ853575 | BQ865834 | BU982574 | BU982074 |
| CN868927 | CN939666 | BQ853812 | BQ850258 | BU982574 | BU982920 |
| CN868950 | CN907153 | BQ853918 | DY973192 | BU982574 | CA016341 |
| CN868950 | CN919342 | BQ853918 | DY975179 | BU982574 | CA016942 |
| CN868950 | EB147817 | BQ854026 | BQ847875 | BU982574 | CA021168 |
| CN868985 | CN868647 | BQ854036 | BQ866262 | BU982574 | CA029715 |
| CN868985 | CN901903 | BQ854111 | BQ865551 | BU982574 | CA029951 |
| CN869121 | CN868520 | BQ854121 | DY966753 | BU982574 | CA030694 |
| CN869121 | CN869241 | BQ854167 | BQ858088 | BU982574 | CA030993 |
| CN869121 | CN879921 | BQ854194 | BQ856455 | BU982574 | CA031492 |
| CN869121 | CN883940 | BQ854330 | BQ858549 | BU982574 | CA031767 |
| CN869121 | CN890972 | BQ854349 | BQ851201 | BU982574 | CA032305 |
| CN869121 | CN940836 | BQ854361 | BQ858542 | BU982574 | CB874561 |
| CN869121 | CN943203 | BQ854492 | DY974753 | BU982574 | CB876245 |
| CN869121 | CN945556 | BQ854517 | DY975050 | BU982574 | CB879960 |
| CN869121 | CN947184 | BQ854649 | BQ843832 | BU982574 | CB880475 |
| CN869258 | CN869241 | BQ854656 | DY983576 | BU982579 | AL501419 |
| CN869258 | CN870119 | BQ854730 | BQ865551 | BU982579 | AL507779 |
| CN869258 | CN879921 | BQ854758 | BQ854273 | BU982579 | BU983898 |
| CN869258 | CN883940 | BQ854917 | DY960479 | BU982579 | BU999349 |
| CN869258 | CN901911 | BQ854927 | DW126527 | BU982579 | CA031468 |
| CN869258 | CN945556 | BQ854985 | BQ851978 | BU982579 | CA031556 |
| CN869258 | EB147178 | BQ855028 | BQ858336 | BU982579 | CA033007 |
| CN869340 | CN919354 | BQ855057 | DY979961 | BU982597 | BQ460282 |
| CN869340 | CN919430 | BQ855120 | DY982205 | BU982597 | CA022372 |
| CN869340 | CN919636 | BQ855169 | BQ865551 | BU982597 | CB876318 |
| CN869340 | CN919688 | BQ855274 | BQ849210 | BU982684 | CK122408 |
| CN869450 | CN868520 | BQ855365 | BQ853640 | BU982737 | CA000338 |
| CN869450 | CN940836 | BQ855423 | BQ858336 | BU982748 | BQ460282 |
| CN869455 | CN849780 | BQ855552 | BQ858738 | BU982748 | CA022372 |
| CN869455 | CN850504 | BQ855658 | DY967083 | BU982776 | AL511051 |
| CN869455 | CN850552 | BQ855689 | BQ846407 | BU982788 | CA026241 |
| CN869614 | CN869241 | BQ855690 | BQ858336 | BU982794 | BU999379 |
| CN869614 | CN870119 | BQ855745 | BQ856357 | BU982816 | AL501419 |
| CN869614 | CN879921 | BQ855808 | DY982205 | BU982816 | BU999349 |
| CN869614 | CN883940 | BQ855836 | BQ856945 | BU982816 | CA031468 |
| CN869614 | CN890504 | BQ855941 | DY981068 | BU982816 | CA031556 |
| CN869614 | CN901911 | BQ856049 | DY981805 | BU982816 | CA033007 |
| CN869614 | CN945556 | BQ856077 | BQ865551 | BU982816 | CB876133 |
| CN869614 | EB147178 | BQ856148 | BQ872037 | BU982853 | CK124660 |
| CN869650 | CN869241 | BQ856158 | BQ858336 | BU982976 | CA000338 |
| CN869650 | CN943203 | BQ856168 | BQ867646 | BU982976 | CA002915 |
| CN869650 | CN945556 | BQ856228 | BQ857082 | BU982989 | AL501419 |
| CN869681 | CN868520 | BQ856361 | DY979716 | BU982994 | CK124549 |
| CN869681 | CN869241 | BQ856373 | BQ856810 | BU983169 | BQ657242 |
| CN869681 | CN879921 | BQ856441 | BQ863521 | BU983169 | CB875022 |
| CN869681 | CN940836 | BQ856470 | BQ865551 | BU983186 | AL511051 |
| CN869681 | CN943203 | BQ856548 | BQ862651 | BU983193 | CA020051 |
| CN869681 | CN945556 | BQ856548 | DW137393 | BU983311 | AL507953 |

|          |          |          |          |          |          |
|----------|----------|----------|----------|----------|----------|
| CN869705 | CN870119 | BQ856565 | BQ858738 | BU983319 | AL511051 |
| CN869705 | CN879921 | BQ856614 | BQ871828 | BU983319 | BQ460282 |
| CN869705 | CN890972 | BQ856624 | BQ865834 | BU983319 | CA033007 |
| CN869721 | CN882643 | BQ856711 | BQ874938 | BU983319 | CB876133 |
| CN869750 | CN868647 | BQ856787 | BQ874370 | BU983319 | CB876318 |
| CN869750 | CN901903 | BQ856841 | BQ855262 | BU983320 | CB879172 |
| CN869803 | CN869241 | BQ856893 | BQ858661 | BU983396 | AL504895 |
| CN869803 | CN883940 | BQ856932 | DW133551 | BU983396 | AL506215 |
| CN869803 | CN890972 | BQ857167 | DY980889 | BU983396 | BQ459032 |
| CN869813 | CN888038 | BQ857181 | BQ858336 | BU983396 | BQ461153 |
| CN869813 | CN890134 | BQ857253 | BQ866357 | BU983396 | BU998271 |
| CN869813 | CN891218 | BQ857291 | DY966753 | BU983396 | BU998641 |
| CN869813 | CN906559 | BQ857358 | BQ870638 | BU983396 | CA010023 |
| CN869813 | CN942163 | BQ857417 | BQ851366 | BU983396 | CA020391 |
| CN869813 | CN949198 | BQ857446 | BQ873588 | BU983396 | CK122048 |
| CN869848 | CN874151 | BQ857495 | BQ851796 | BU983396 | CK122822 |
| CN869919 | CN864962 | BQ857590 | BQ853640 | BU983396 | CK123085 |
| CN869919 | CN877470 | BQ857641 | BQ850951 | BU983396 | CK123086 |
| CN869970 | CN879921 | BQ857776 | BQ845727 | BU983396 | CK123171 |
| CN870054 | CN849249 | BQ857776 | BQ849523 | BU983396 | CK124355 |
| CN870054 | CN869860 | BQ857776 | BQ856509 | BU983396 | CK124634 |
| CN870151 | EB129101 | BQ857807 | DY963233 | BU983396 | CK125382 |
| CN870366 | CN868520 | BQ857816 | DY978663 | BU983424 | AL511051 |
| CN870366 | CN879514 | BQ857930 | DY981611 | BU983424 | CB876133 |
| CN870366 | CN940836 | BQ857938 | BQ851825 | BU983463 | AL504078 |
| CN870366 | CN943203 | BQ857946 | BQ854427 | BU983507 | BQ459032 |
| CN870515 | CN878354 | BQ857957 | BQ847279 | BU983507 | BQ465166 |
| CN870515 | CN879921 | BQ857963 | BQ865422 | BU983507 | BQ466637 |
| CN870515 | CN883940 | BQ858003 | BQ858077 | BU983507 | BU981028 |
| CN870515 | CN890972 | BQ858017 | BQ865834 | BU983507 | BU998271 |
| CN870530 | EB120350 | BQ858054 | DW126527 | BU983507 | BU998641 |
| CN870530 | EB150692 | BQ858115 | BQ859349 | BU983507 | CA004461 |
| CN870541 | CN869241 | BQ858237 | BQ856194 | BU983507 | CA007684 |
| CN870541 | CN870119 | BQ858267 | DY981611 | BU983507 | CA008890 |
| CN870541 | CN879921 | BQ858290 | DY974947 | BU983507 | CA017802 |
| CN870541 | CN883940 | BQ858327 | BQ851825 | BU983507 | CA017950 |
| CN870541 | CN890504 | BQ858466 | BQ851388 | BU983507 | CA023595 |
| CN870541 | CN901911 | BQ858545 | DW127040 | BU983507 | CK122048 |
| CN870541 | CN945556 | BQ858588 | BQ850869 | BU983507 | CK122822 |
| CN870576 | CN879514 | BQ858588 | BQ851608 | BU983507 | CK123068 |
| CN870576 | CN943203 | BQ858898 | BQ863855 | BU983507 | CK123143 |
| CN870615 | CN869241 | BQ858898 | DW139086 | BU983507 | CK124148 |
| CN870615 | CN870119 | BQ859055 | BQ858077 | BU983507 | CK124634 |
| CN870615 | CN879921 | BQ859251 | DY960580 | BU983601 | CB876133 |
| CN870615 | CN883940 | BQ859299 | DY967389 | BU983601 | CB876512 |
| CN870615 | CN901911 | BQ859351 | BQ851825 | BU983605 | BQ460282 |
| CN870615 | EB147178 | BQ859420 | DY975050 | BU983605 | CA022372 |
| CN870821 | CN895504 | BQ859430 | BQ858542 | BU983666 | BQ468002 |
| CN870869 | CN849356 | BQ859524 | BQ873667 | BU983670 | AL501419 |
| CN870869 | CN881429 | BQ859524 | BQ875767 | BU983806 | BQ462517 |
| CN870869 | CN894523 | BQ859629 | BQ851201 | BU983806 | BQ463351 |
| CN870869 | CN904703 | BQ859630 | BQ860749 | BU983806 | BQ469586 |

|          |          |          |          |          |          |
|----------|----------|----------|----------|----------|----------|
| CN870922 | CN884870 | BQ859630 | BQ868156 | BU983806 | BU977829 |
| CN872638 | CN892039 | BQ859630 | DW123577 | BU983806 | BU981647 |
| CN872954 | CN872340 | BQ859649 | DY977687 | BU983815 | CA000338 |
| CN873353 | CN862847 | BQ859665 | BQ858542 | BU983911 | BU999757 |
| CN873581 | CN887144 | BQ859721 | BQ876011 | BU983945 | AL499744 |
| CN873632 | CN860632 | BQ859825 | BQ849795 | BU983945 | AL500293 |
| CN873714 | CN868107 | BQ859825 | BQ863666 | BU983945 | BQ470836 |
| CN873757 | CN907126 | BQ859904 | BQ872692 | BU983945 | CA030106 |
| CN873757 | CN939782 | BQ860079 | BQ858542 | BU983945 | CB859891 |
| CN873757 | CN942901 | BQ860129 | DW135762 | BU983945 | CB875913 |
| CN873757 | CN943538 | BQ860161 | BQ843957 | BU983945 | CB878478 |
| CN873823 | CN873929 | BQ860243 | BQ867229 | BU983945 | CB880504 |
| CN873927 | CN873929 | BQ860260 | DY960769 | BU983988 | AL501419 |
| CN873927 | CN878903 | BQ860277 | BQ851825 | BU984003 | BQ459366 |
| CN873927 | CN907126 | BQ860306 | BQ859898 | BU984003 | CA001694 |
| CN873927 | CN907350 | BQ860306 | DW123577 | BU984003 | CB882724 |
| CN873927 | CN919240 | BQ860306 | DW123796 | BU984086 | CA028099 |
| CN873927 | CN930709 | BQ860324 | BQ863009 | BU994036 | BU999295 |
| CN873927 | CN931638 | BQ860324 | DY982470 | BU994060 | AL501419 |
| CN873927 | CN934605 | BQ860329 | BQ876011 | BU994060 | BU999349 |
| CN873927 | CN940031 | BQ860404 | DW134233 | BU994060 | CA031468 |
| CN873927 | CN941534 | BQ860446 | BQ872596 | BU994060 | CA031556 |
| CN873927 | CN943728 | BQ860448 | BQ853640 | BU994060 | CA033007 |
| CN873927 | CN945200 | BQ860471 | DY969951 | BU994060 | CB876133 |
| CN873927 | CN946809 | BQ860608 | BQ863260 | BU994080 | CA009106 |
| CN873927 | CN947320 | BQ860637 | BQ860749 | BU994107 | BQ466683 |
| CN873927 | CN948142 | BQ860637 | BQ868156 | BU994107 | BQ467003 |
| CN873927 | CN948761 | BQ860637 | DW123577 | BU994141 | AL503646 |
| CN874076 | CN877220 | BQ860639 | DW128801 | BU994141 | BQ661176 |
| CN874127 | CN862261 | BQ860682 | BQ872413 | BU994141 | CA017988 |
| CN874188 | CN906951 | BQ860691 | BQ851825 | BU994224 | BQ466970 |
| CN874188 | CN907350 | BQ860867 | BQ859898 | BU994494 | AL503433 |
| CN874188 | CN907355 | BQ860867 | BQ860749 | BU994757 | BQ657036 |
| CN874188 | CN945200 | BQ860867 | BQ868156 | BU994757 | BQ657197 |
| CN874188 | CN948142 | BQ860867 | DW123577 | BU994757 | BQ657783 |
| CN874188 | CN948761 | BQ860867 | DW124431 | BU994757 | BQ657897 |
| CN874217 | CN919240 | BQ860867 | DW137273 | BU994757 | BU982915 |
| CN874217 | CN934605 | BQ860942 | BQ867502 | BU994757 | BU995430 |
| CN874217 | CN936965 | BQ860980 | DY961717 | BU994757 | CA024062 |
| CN874217 | CN940031 | BQ861000 | BQ874083 | BU994757 | CB858818 |
| CN874217 | CN948761 | BQ861039 | DY970512 | BU994757 | CK123794 |
| CN874217 | CN948805 | BQ861111 | DW140170 | BU994957 | BQ662789 |
| CN874396 | CN882438 | BQ861127 | DY969984 | BU995004 | BU995324 |
| CN874421 | CN873929 | BQ861143 | DY973693 | BU995018 | AL508104 |
| CN874421 | CN907246 | BQ861287 | DY983576 | BU995084 | BU999775 |
| CN874421 | CN919240 | BQ861333 | BQ860829 | BU995142 | BQ459770 |
| CN874421 | CN931638 | BQ861337 | BQ858088 | BU995142 | BQ657500 |
| CN874421 | CN934605 | BQ861353 | BQ858909 | BU995203 | BQ460348 |
| CN874421 | CN938978 | BQ861386 | BQ872692 | BU995203 | BQ664950 |
| CN874421 | CN940031 | BQ861429 | DY983576 | BU995203 | BQ665658 |
| CN874421 | CN941534 | BQ861521 | BQ867502 | BU995203 | BU983268 |
| CN874421 | CN946809 | BQ861544 | BQ871430 | BU995203 | BU999624 |

|          |          |          |          |          |          |
|----------|----------|----------|----------|----------|----------|
| CN874421 | CN947320 | BQ861622 | DY964141 | BU995203 | CA030247 |
| CN874547 | CN862369 | BQ861671 | BQ863002 | BU995203 | CA030714 |
| CN874547 | CN881768 | BQ861878 | DW127040 | BU995250 | CA006133 |
| CN874547 | CN941102 | BQ861905 | BQ862527 | BU995492 | BQ459858 |
| CN874802 | CN907126 | BQ861943 | DY973554 | BU995492 | BQ656432 |
| CN874802 | CN907246 | BQ861977 | BQ859020 | BU995492 | BQ657005 |
| CN874802 | CN919240 | BQ862182 | BQ865551 | BU995492 | BQ657022 |
| CN874802 | CN930734 | BQ862235 | BQ851825 | BU995492 | BQ657160 |
| CN874802 | CN939782 | BQ862250 | BQ860951 | BU995492 | BQ657197 |
| CN874802 | CN948142 | BQ862252 | BQ865551 | BU995492 | BQ657783 |
| CN874802 | EB147518 | BQ862298 | DW129067 | BU995492 | BQ657897 |
| CN874802 | EB148493 | BQ862298 | DW129274 | BU995492 | BQ661192 |
| CN874802 | EB148665 | BQ862298 | DY961136 | BU995492 | BU979920 |
| CN874941 | EB146654 | BQ862441 | BQ859898 | BU995492 | BU982915 |
| CN875022 | CN877470 | BQ862441 | BQ860749 | BU995492 | BU995099 |
| CN875060 | CN865950 | BQ862441 | BQ868156 | BU995492 | BU998075 |
| CN875111 | CN907246 | BQ862441 | DW123577 | BU995492 | CA029456 |
| CN875111 | CN907280 | BQ862441 | DW123796 | BU995492 | CK123312 |
| CN875111 | CN930734 | BQ862491 | BQ860749 | BU995492 | CK123794 |
| CN875111 | CN948142 | BQ862501 | DY968082 | BU995522 | BQ657500 |
| CN875111 | CN948761 | BQ862517 | DY962517 | BU995578 | BQ466648 |
| CN875111 | EB147518 | BQ862560 | BQ858748 | BU995578 | BQ466970 |
| CN875111 | EB148180 | BQ862560 | BQ862794 | BU995669 | BQ463419 |
| CN875111 | EB148665 | BQ862560 | BQ863406 | BU995699 | BQ463186 |
| CN875220 | CN889110 | BQ862561 | BQ868372 | BU995848 | AL506462 |
| CN875242 | CN848957 | BQ862631 | DW141356 | BU995848 | AL507170 |
| CN875935 | EB119997 | BQ862631 | DW141438 | BU995848 | AL508095 |
| CN875935 | EB130760 | BQ862645 | BQ855015 | BU995848 | AL508330 |
| CN875935 | EB131039 | BQ862672 | DW138597 | BU995848 | AL508614 |
| CN875935 | EB133030 | BQ862743 | DY969984 | BU995848 | AL508860 |
| CN875935 | EB135819 | BQ862795 | BQ858542 | BU995848 | AL510751 |
| CN875935 | EB135869 | BQ862818 | BQ869138 | BU995848 | AL511365 |
| CN875935 | EB136149 | BQ862842 | DY960089 | BU995848 | BQ458464 |
| CN875935 | EB136414 | BQ862884 | DY965385 | BU995848 | BQ458909 |
| CN875935 | EB136501 | BQ862884 | DY966781 | BU995848 | BQ458981 |
| CN875935 | EB141905 | BQ862971 | DY961136 | BU995848 | BQ460815 |
| CN875935 | EB144931 | BQ863048 | BQ859070 | BU995848 | BQ462536 |
| CN875935 | EB145496 | BQ863091 | DY968422 | BU995848 | BQ463274 |
| CN875935 | EB146300 | BQ863094 | BQ846547 | BU995848 | BQ463382 |
| CN875935 | EB157154 | BQ863094 | BQ874353 | BU995848 | BQ468525 |
| CN875990 | CN874836 | BQ863096 | BQ860749 | BU995848 | BQ469027 |
| CN876037 | EB149092 | BQ863096 | BQ868156 | BU995848 | BQ469058 |
| CN876147 | CN881681 | BQ863096 | DW123577 | BU995848 | BQ469098 |
| CN876147 | CN907246 | BQ863096 | DW138597 | BU995848 | BQ469503 |
| CN876147 | CN907280 | BQ863223 | BQ868982 | BU995848 | BQ469573 |
| CN876147 | CN930734 | BQ863223 | BQ869150 | BU995848 | BQ470050 |
| CN876147 | CN948142 | BQ863239 | BQ858336 | BU995848 | BQ470432 |
| CN876147 | EB147518 | BQ863351 | DW136044 | BU995848 | BQ471439 |
| CN876147 | EB148133 | BQ863366 | DW141656 | BU995848 | BQ664899 |
| CN876147 | EB148665 | BQ863380 | DY964806 | BU995848 | BU976924 |
| CN876431 | CN883929 | BQ863380 | DY966906 | BU995848 | BU978089 |
| CN876431 | CN887736 | BQ863423 | DY982470 | BU995848 | BU978090 |

|          |          |          |          |          |          |
|----------|----------|----------|----------|----------|----------|
| CN876431 | CN941711 | BQ863434 | DW134589 | BU995848 | BU983141 |
| CN876431 | CN944369 | BQ863434 | DW141990 | BU995848 | BU994354 |
| CN876439 | CN876937 | BQ863451 | DY961087 | BU995848 | BU994468 |
| CN876447 | CN879468 | BQ863534 | DY982470 | BU995848 | BU996578 |
| CN876514 | EB177119 | BQ863542 | DY982759 | BU995848 | BU996777 |
| CN876579 | CN941257 | BQ863572 | BQ865422 | BU995848 | BU996969 |
| CN876614 | EB149092 | BQ863621 | BQ859898 | BU995848 | BU997868 |
| CN876652 | CN894660 | BQ863621 | DW123577 | BU995848 | BU998279 |
| CN876812 | CN882294 | BQ863621 | DW123796 | BU995848 | BU998933 |
| CN876837 | CN939633 | BQ863717 | BQ850033 | BU995848 | BU998989 |
| CN876850 | CN875283 | BQ863717 | BQ855112 | BU995848 | BU999684 |
| CN876858 | CN895841 | BQ863717 | DW127652 | BU995848 | CA018734 |
| CN876900 | CN946869 | BQ863720 | DY966188 | BU995848 | CA020735 |
| CN877133 | CN874836 | BQ863815 | BQ875264 | BU995848 | CA020767 |
| CN877144 | CN907126 | BQ863829 | BQ858077 | BU995848 | CA020850 |
| CN877144 | CN907246 | BQ863829 | DY963819 | BU995848 | CA020949 |
| CN877144 | CN919240 | BQ863847 | BQ843387 | BU995848 | CA020996 |
| CN877144 | CN930734 | BQ863867 | DY983576 | BU995848 | CA021100 |
| CN877144 | CN939782 | BQ863901 | DY972261 | BU995848 | CA021367 |
| CN877144 | CN948142 | BQ863907 | BQ852347 | BU995848 | CA021655 |
| CN877144 | EB147518 | BQ863907 | BQ862090 | BU995848 | CA021781 |
| CN877144 | EB148493 | BQ863907 | DY976509 | BU995848 | CA021789 |
| CN877144 | EB148665 | BQ863948 | BQ873588 | BU995848 | CA022143 |
| CN877182 | CN904008 | BQ863952 | DY974201 | BU995848 | CA022402 |
| CN877336 | EB149092 | BQ863957 | BQ873588 | BU995848 | CA022753 |
| CN877362 | CN876937 | BQ864009 | DW144386 | BU995848 | CA022770 |
| CN877405 | CN876655 | BQ864059 | BQ868775 | BU995848 | CA023135 |
| CN877552 | CN878903 | BQ864219 | BQ849485 | BU995848 | CA023509 |
| CN877552 | CN906951 | BQ864219 | BQ850176 | BU995848 | CA023653 |
| CN877552 | CN907126 | BQ864219 | BQ850460 | BU995848 | CA023901 |
| CN877552 | CN907350 | BQ864219 | BQ850476 | BU995848 | CA023963 |
| CN877552 | CN907355 | BQ864219 | BQ850635 | BU995848 | CA024063 |
| CN877552 | CN930709 | BQ864219 | BQ851457 | BU995848 | CA024406 |
| CN877552 | CN943336 | BQ864219 | BQ851487 | BU995848 | CA024449 |
| CN877552 | CN943728 | BQ864219 | BQ851600 | BU995848 | CA024521 |
| CN877552 | CN945200 | BQ864219 | BQ852232 | BU995848 | CA024620 |
| CN877552 | CN948142 | BQ864219 | BQ852282 | BU995848 | CA024665 |
| CN877552 | CN948761 | BQ864219 | BQ852314 | BU995848 | CA024781 |
| CN877604 | CN848710 | BQ864219 | BQ852531 | BU995848 | CA024831 |
| CN877604 | CN891189 | BQ864219 | BQ852620 | BU995848 | CA025073 |
| CN877604 | CN940434 | BQ864219 | BQ854111 | BU995848 | CA025102 |
| CN877712 | CN876937 | BQ864219 | BQ854879 | BU995848 | CA025162 |
| CN877846 | CN873929 | BQ864219 | BQ855131 | BU995848 | CA025806 |
| CN877846 | CN907246 | BQ864219 | BQ855154 | BU995848 | CA025988 |
| CN877846 | CN919240 | BQ864219 | BQ855330 | BU995848 | CA026038 |
| CN877846 | CN931638 | BQ864219 | BQ855942 | BU995848 | CA026151 |
| CN877846 | CN934605 | BQ864219 | BQ856077 | BU995848 | CA026436 |
| CN877846 | CN938978 | BQ864219 | BQ856348 | BU995848 | CA027104 |
| CN877846 | CN940031 | BQ864219 | BQ856454 | BU995848 | CA027137 |
| CN877846 | CN941534 | BQ864219 | BQ856470 | BU995848 | CA027394 |
| CN877846 | CN946809 | BQ864219 | BQ857064 | BU995848 | CA027421 |
| CN877846 | CN947320 | BQ864219 | BQ857073 | BU995848 | CA027803 |

|          |          |          |          |          |          |
|----------|----------|----------|----------|----------|----------|
| CN877866 | CN906951 | BQ864219 | BQ857332 | BU995848 | CA028196 |
| CN877866 | CN907350 | BQ864219 | BQ862025 | BU995848 | CA028461 |
| CN877866 | CN907355 | BQ864219 | BQ862182 | BU995848 | CA028583 |
| CN877866 | CN945200 | BQ864219 | BQ862252 | BU995848 | CA028834 |
| CN877866 | CN948142 | BQ864219 | BQ865203 | BU995848 | CA029091 |
| CN877866 | CN948761 | BQ864219 | BQ865253 | BU995848 | CA029236 |
| CN877866 | EB148180 | BQ864219 | BQ866281 | BU995848 | CA029423 |
| CN878076 | CN880622 | BQ864219 | BQ867825 | BU995848 | CA029440 |
| CN878264 | CN862261 | BQ864219 | BQ871054 | BU995848 | CA029527 |
| CN878315 | EB148425 | BQ864219 | BQ872814 | BU995848 | CA029604 |
| CN878402 | CN880249 | BQ864219 | BQ873335 | BU995848 | CA029979 |
| CN878455 | CN884017 | BQ864219 | BQ873619 | BU995848 | CA030269 |
| CN878506 | CN851790 | BQ864219 | BQ875299 | BU995848 | CA030842 |
| CN878650 | CN884017 | BQ864219 | DW128380 | BU995848 | CA030885 |
| CN878676 | CN874160 | BQ864219 | DW135489 | BU995848 | CB859602 |
| CN878678 | CN873929 | BQ864219 | DW136903 | BU995848 | CB874816 |
| CN878678 | CN907126 | BQ864219 | DY977321 | BU995848 | CB874872 |
| CN878678 | CN907246 | BQ864219 | DY977367 | BU995848 | CB875334 |
| CN878678 | CN907280 | BQ864219 | DY979009 | BU995848 | CB875601 |
| CN878678 | CN907355 | BQ864219 | DY983130 | BU995848 | CB875823 |
| CN878678 | CN919240 | BQ864277 | BQ867502 | BU995848 | CB880324 |
| CN878678 | CN930734 | BQ864345 | DW132303 | BU995848 | CB881485 |
| CN878678 | CN931638 | BQ864345 | DW139075 | BU995848 | CB883055 |
| CN878678 | CN934605 | BQ864477 | BQ871430 | BU995848 | CB883464 |
| CN878678 | CN938978 | BQ864519 | DY975435 | BU995848 | CK122928 |
| CN878678 | CN939782 | BQ864572 | BQ845860 | BU995848 | CK123762 |
| CN878678 | CN940031 | BQ864595 | BQ872034 | BU995848 | CK125190 |
| CN878678 | CN941534 | BQ864623 | BQ858196 | BU995921 | AL507779 |
| CN878678 | CN942901 | BQ864649 | BQ854446 | BU995921 | AL511051 |
| CN878678 | CN943538 | BQ865116 | BQ863912 | BU995921 | BU983898 |
| CN878678 | CN946809 | BQ865121 | DY960580 | BU995921 | BU999349 |
| CN878678 | CN947320 | BQ865144 | BQ861238 | BU995921 | CA031468 |
| CN878678 | CN948123 | BQ865188 | BQ851825 | BU995921 | CA031556 |
| CN878678 | CN948142 | BQ865380 | DY978595 | BU995921 | CA033007 |
| CN878678 | EB147518 | BQ865383 | BQ859898 | BU995921 | CB876133 |
| CN878678 | EB148133 | BQ865383 | DW123577 | BU996084 | CB876211 |
| CN878678 | EB148180 | BQ865383 | DW123796 | BU996084 | CB876512 |
| CN878678 | EB148493 | BQ865425 | BQ853094 | BU996269 | CB881027 |
| CN878678 | EB148665 | BQ865673 | BQ866765 | BU996269 | CB881244 |
| CN878680 | CN907246 | BQ865692 | BQ858336 | BU996357 | CB878276 |
| CN878680 | CN907280 | BQ865936 | BQ850258 | BU996506 | BU996688 |
| CN878680 | CN930734 | BQ865943 | BQ867648 | BU996558 | AL504078 |
| CN878680 | CN948142 | BQ865988 | BQ858336 | BU996603 | CB858585 |
| CN878680 | EB147518 | BQ866002 | DY982470 | BU996623 | CA024144 |
| CN878680 | EB148665 | BQ866059 | DY975435 | BU996623 | CA026981 |
| CN878700 | CN859578 | BQ866082 | BQ875492 | BU997055 | BQ460176 |
| CN878827 | CN873929 | BQ866245 | DY960216 | BU997055 | BQ467980 |
| CN878827 | CN881681 | BQ866245 | DY967490 | BU997055 | BQ470969 |
| CN878827 | EB148133 | BQ866265 | DW141356 | BU997055 | BU978050 |
| CN878849 | CN876937 | BQ866373 | BQ868775 | BU997055 | CA029328 |
| CN878857 | CN882643 | BQ866431 | BQ851662 | BU997055 | CA030052 |
| CN878929 | EB147413 | BQ866565 | BQ849824 | BU997055 | CA031413 |

|          |          |          |          |          |          |
|----------|----------|----------|----------|----------|----------|
| CN878932 | CN862786 | BQ866645 | BQ851825 | BU997055 | CA032528 |
| CN879000 | EB119560 | BQ866690 | BQ873523 | BU997055 | CA032849 |
| CN879000 | EB124113 | BQ866724 | BQ865333 | BU997055 | CB876516 |
| CN879000 | EB131765 | BQ866737 | BQ869140 | BU997055 | CK122718 |
| CN879000 | EB133622 | BQ866787 | BQ845860 | BU997172 | CA024060 |
| CN879000 | EB134458 | BQ866809 | BQ866262 | BU997271 | CB875358 |
| CN879000 | EB135387 | BQ866883 | DW138597 | BU997348 | BQ460282 |
| CN879000 | EB136501 | BQ866892 | DY975435 | BU997348 | CA031556 |
| CN879000 | EB136941 | BQ866963 | DW135860 | BU997348 | CB876211 |
| CN879172 | CN930700 | BQ866970 | BQ871969 | BU997348 | CB876512 |
| CN879174 | EB147413 | BQ866975 | BQ866262 | BU997451 | BQ665012 |
| CN879191 | CN944483 | BQ866982 | BQ855262 | BU997451 | BU977623 |
| CN879202 | EB147105 | BQ867148 | BQ858336 | BU997451 | BU978339 |
| CN879415 | CN948761 | BQ867188 | BQ865834 | BU997451 | CA026432 |
| CN879415 | EB148180 | BQ867255 | BQ855262 | BU997451 | CB860148 |
| CN879440 | CN873929 | BQ867302 | DY980919 | BU997499 | AL503225 |
| CN879440 | CN878903 | BQ867336 | DY969951 | BU997594 | CA020142 |
| CN879440 | CN907126 | BQ867359 | BQ851669 | BU997667 | BQ459770 |
| CN879440 | CN907280 | BQ867458 | DW136142 | BU997667 | BQ657500 |
| CN879440 | CN907350 | BQ867552 | DY978455 | BU997689 | CA007794 |
| CN879440 | CN919240 | BQ867710 | BQ868156 | BU997697 | BQ460282 |
| CN879440 | CN930709 | BQ867756 | BQ858336 | BU997697 | BU983898 |
| CN879440 | CN930734 | BQ867805 | BQ850258 | BU997697 | BU998845 |
| CN879440 | CN931638 | BQ867816 | BQ872692 | BU997697 | CA022372 |
| CN879440 | CN934605 | BQ867825 | BQ865551 | BU997697 | CA031556 |
| CN879440 | CN938978 | BQ867827 | BQ859891 | BU997697 | CB876211 |
| CN879440 | CN940031 | BQ867861 | BQ870457 | BU997697 | CB876318 |
| CN879440 | CN941534 | BQ868042 | BQ859291 | BU997697 | CB876512 |
| CN879440 | CN943728 | BQ868042 | BQ863932 | BU997774 | CB876512 |
| CN879440 | CN945200 | BQ868042 | BQ865031 | BU997819 | BU980970 |
| CN879440 | CN946809 | BQ868042 | DY970410 | BU997943 | CA026486 |
| CN879440 | CN947320 | BQ868235 | DY970603 | BU997966 | CA031556 |
| CN879440 | CN948142 | BQ868287 | BQ862507 | BU997966 | CB876211 |
| CN879440 | CN948761 | BQ868415 | BQ859898 | BU997966 | CB876512 |
| CN879440 | EB147518 | BQ868415 | BQ860749 | BU997991 | AL503225 |
| CN879440 | EB148493 | BQ868415 | DW123577 | BU998162 | BQ462716 |
| CN879440 | EB148665 | BQ868415 | DW123796 | BU998162 | BQ472251 |
| CN879448 | CN930341 | BQ868415 | DW124431 | BU998162 | CA030110 |
| CN879499 | CN878903 | BQ868415 | DW137273 | BU998162 | CB876075 |
| CN879499 | CN907126 | BQ868425 | BQ862375 | BU998182 | CA018322 |
| CN879499 | CN907350 | BQ868427 | DY960012 | BU998223 | CA029833 |
| CN879499 | CN930709 | BQ868691 | DW124585 | BU998346 | CB876512 |
| CN879499 | CN931638 | BQ868691 | DW127569 | BU998365 | CA015272 |
| CN879499 | CN943728 | BQ868691 | DW127664 | BU998432 | CA033005 |
| CN879499 | CN945200 | BQ868691 | DW144132 | BU998501 | CA021670 |
| CN879499 | CN948142 | BQ868691 | DW144163 | BU998578 | AL508104 |
| CN879499 | CN948761 | BQ868943 | BQ862794 | BU998618 | CB878079 |
| CN879547 | CN859509 | BQ869009 | BQ860749 | BU998769 | CK124170 |
| CN879584 | CN873929 | BQ869009 | BQ868156 | BU998769 | CK124697 |
| CN879584 | CN907246 | BQ869009 | DW123577 | BU998775 | BQ460232 |
| CN879584 | CN919240 | BQ869052 | DW131446 | BU998775 | CA007101 |
| CN879584 | CN934605 | BQ869071 | BQ869994 | BU998775 | CA030216 |



|          |          |          |          |          |          |
|----------|----------|----------|----------|----------|----------|
| CN879584 | CN941534 | BQ869283 | DY973554 | BU998775 | CB879248 |
| CN879584 | CN946809 | BQ869316 | BQ851825 | BU998791 | BQ465671 |
| CN879584 | CN947320 | BQ869322 | BQ858542 | BU999007 | BU980970 |
| CN879658 | CN859732 | BQ869404 | BQ853182 | BU999026 | CA012707 |
| CN879791 | CN874476 | BQ869417 | BQ855262 | BU999032 | AL503987 |
| CN879864 | CN870733 | BQ869429 | DY977498 | BU999241 | BU999194 |
| CN879885 | CN907246 | BQ869612 | BQ861238 | BU999343 | CA033005 |
| CN879885 | CN938978 | BQ869630 | BQ870516 | BU999347 | AL511051 |
| CN879908 | CN876937 | BQ869711 | BQ858934 | BU999347 | CA033007 |
| CN879931 | CN873929 | BQ869711 | BQ868029 | BU999347 | CB876133 |
| CN879931 | CN907126 | BQ869711 | BQ870665 | BU999405 | BQ466583 |
| CN879931 | CN942901 | BQ869771 | BQ867728 | BU999458 | BQ458407 |
| CN879931 | CN943538 | BQ869771 | BQ868159 | BU999458 | BQ459627 |
| CN879931 | CN948123 | BQ869861 | BQ865537 | BU999458 | BQ657242 |
| CN879959 | CN940599 | BQ869993 | DY959972 | BU999458 | BQ660796 |
| CN879977 | EB146734 | BQ870333 | BQ856455 | BU999458 | BU980036 |
| CN880183 | EB147413 | BQ870342 | BQ869289 | BU999458 | BU997210 |
| CN880191 | CN873929 | BQ870343 | DW126507 | BU999458 | BU999456 |
| CN880191 | CN881681 | BQ870343 | DW131116 | BU999458 | CA023581 |
| CN880191 | CN934605 | BQ870343 | DW132303 | BU999458 | CA033016 |
| CN880191 | CN941566 | BQ870343 | DW132886 | BU999458 | CB858866 |
| CN880191 | CN943728 | BQ870343 | DW133092 | BU999458 | CB875558 |
| CN880191 | CN948638 | BQ870343 | DW133250 | BU999483 | CA015452 |
| CN880191 | EB148133 | BQ870343 | DW139075 | BU999561 | AL508104 |
| CN880191 | EB148478 | BQ870447 | DY975893 | BU999603 | BQ470126 |
| CN880191 | EB148493 | BQ870494 | BQ862375 | BU999613 | BE421724 |
| CN880195 | CN873929 | BQ870503 | BQ872692 | BU999613 | CB874686 |
| CN880195 | CN907246 | BQ870509 | BQ859898 | BU999952 | CA006133 |
| CN880195 | CN919240 | BQ870509 | BQ860749 | CA000132 | BU976565 |
| CN880195 | CN934605 | BQ870509 | DW124431 | CA000233 | CA004907 |
| CN880195 | CN941534 | BQ870509 | DW137273 | CA000240 | CK123162 |
| CN880195 | CN946809 | BQ870539 | BQ869702 | CA000794 | BQ660164 |
| CN880195 | CN947320 | BQ870614 | DW140128 | CA000794 | BQ662866 |
| CN880225 | CN921351 | BQ870617 | BQ859898 | CA000794 | BU976570 |
| CN880354 | CN930700 | BQ870617 | BQ860749 | CA000794 | BU978923 |
| CN880389 | CN857056 | BQ870617 | DW124431 | CA000825 | CA010817 |
| CN880439 | CN930503 | BQ870617 | DW137273 | CA000890 | CA010817 |
| CN880481 | CN864738 | BQ870732 | BQ872692 | CA000984 | CA010817 |
| CN880481 | CN873918 | BQ870776 | BQ873588 | CA001173 | BQ663674 |
| CN880481 | CN875685 | BQ870782 | BQ872882 | CA001208 | CA002930 |
| CN880481 | CN876799 | BQ870797 | BQ875638 | CA001296 | BU976750 |
| CN880481 | CN879070 | BQ870920 | BQ875638 | CA001797 | CA020486 |
| CN880481 | CN880092 | BQ870926 | BQ873613 | CA001809 | BQ467723 |
| CN880481 | CN890689 | BQ870938 | BQ843793 | CA001899 | BQ465065 |
| CN880481 | CN890932 | BQ870945 | BQ853640 | CA001930 | BQ466991 |
| CN880481 | CN892751 | BQ870946 | BQ872413 | CA002024 | BU997455 |
| CN880481 | CN935578 | BQ870947 | DY983576 | CA002064 | CA020051 |
| CN880481 | CN940779 | BQ870967 | DY983576 | CA002171 | AL508480 |
| CN880481 | CN946447 | BQ870972 | BQ873588 | CA002172 | BQ463441 |
| CN880481 | EB149733 | BQ871049 | BQ863260 | CA002172 | BU981267 |
| CN880502 | CN862745 | BQ871052 | BQ873588 | CA002196 | AL507313 |
| CN880598 | CN856524 | BQ871061 | BQ870982 | CA002371 | CA008205 |

|          |          |          |          |          |          |
|----------|----------|----------|----------|----------|----------|
| CN880610 | CN943478 | BQ871089 | BQ874832 | CA002371 | CA009073 |
| CN880728 | CN879960 | BQ871124 | BQ874711 | CA002371 | CA009741 |
| CN880728 | CN907126 | BQ871139 | BQ875206 | CA002371 | CA025211 |
| CN880728 | CN919240 | BQ871194 | BQ853640 | CA002421 | AL508104 |
| CN880728 | CN930734 | BQ871238 | BQ873588 | CA003079 | CA017590 |
| CN880728 | CN936965 | BQ871241 | BQ872596 | CA003216 | BQ471607 |
| CN880728 | CN940031 | BQ871252 | BQ871914 | CA003249 | CA032856 |
| CN880728 | CN941534 | BQ871269 | DW126527 | CA003250 | CB876644 |
| CN880728 | CN941566 | BQ871270 | BQ853342 | CA003255 | BQ662789 |
| CN880728 | CN948142 | BQ871270 | BQ853640 | CA003410 | AL506037 |
| CN880728 | CN948761 | BQ871523 | BQ863260 | CA003410 | CK122831 |
| CN880728 | CN948805 | BQ871540 | BQ872692 | CA003597 | AL508104 |
| CN880728 | EB147518 | BQ871542 | BQ872596 | CA003615 | BQ463186 |
| CN880728 | EB148478 | BQ871544 | BQ853640 | CA003688 | AL505599 |
| CN880728 | EB148493 | BQ871565 | BQ857164 | CA003774 | BU998969 |
| CN880728 | EB148665 | BQ871576 | BQ872596 | CA003814 | CA010817 |
| CN880842 | CN873929 | BQ871602 | BQ874832 | CA003945 | BQ465035 |
| CN880842 | CN879960 | BQ871613 | BQ873588 | CA003990 | CK123926 |
| CN880842 | CN907126 | BQ871630 | BQ875579 | CA004066 | BQ465065 |
| CN880842 | CN907280 | BQ871633 | BQ871828 | CA004169 | CA000960 |
| CN880842 | CN907355 | BQ871633 | BQ871914 | CA004172 | CA006133 |
| CN880842 | CN919240 | BQ871633 | BQ875579 | CA004250 | CA002639 |
| CN880842 | CN936965 | BQ871639 | BQ853342 | CA004377 | CA009920 |
| CN880842 | CN939782 | BQ871639 | BQ853640 | CA004544 | CA017780 |
| CN880842 | CN940031 | BQ871647 | DY979188 | CA004648 | CA026241 |
| CN880842 | CN941534 | BQ871649 | BQ858088 | CA004702 | CA020486 |
| CN880842 | CN941566 | BQ871678 | DW140288 | CA004755 | AL508104 |
| CN880842 | CN942901 | BQ871696 | BQ863260 | CA004789 | BQ460282 |
| CN880842 | CN943538 | BQ871706 | BQ858088 | CA004789 | CB876318 |
| CN880842 | CN948123 | BQ871738 | BQ863260 | CA004847 | BQ460282 |
| CN880842 | CN948761 | BQ871742 | BQ873588 | CA004847 | CB876318 |
| CN880842 | CN948805 | BQ871792 | BQ873641 | CA004903 | CA010817 |
| CN880842 | EB148133 | BQ871800 | BQ872509 | CA005002 | CA010817 |
| CN880842 | EB148180 | BQ871831 | BQ871828 | CA005064 | BQ459898 |
| CN880842 | EB148478 | BQ871832 | DY966188 | CA005064 | CB858869 |
| CN880842 | EB148759 | BQ871841 | BQ875767 | CA005086 | CA005717 |
| CN880881 | CN887191 | BQ871842 | BQ850500 | CA005287 | CA005391 |
| CN880881 | CN888731 | BQ871842 | BQ855173 | CA005420 | AL500480 |
| CN880881 | CN889929 | BQ871842 | BQ871417 | CA005442 | CA009015 |
| CN880881 | CN890337 | BQ871842 | BQ872144 | CA005519 | CA010817 |
| CN880925 | CN850513 | BQ871842 | DW124224 | CA005672 | BQ665492 |
| CN880925 | CN850597 | BQ871854 | BQ858088 | CA005692 | BQ662789 |
| CN880925 | CN851771 | BQ871859 | BQ858336 | CA005692 | CA005539 |
| CN880925 | CN888038 | BQ871865 | BQ871828 | CA005741 | CB874812 |
| CN880925 | CN888959 | BQ871865 | BQ875579 | CA005769 | AL506821 |
| CN880925 | CN890134 | BQ871985 | BQ875358 | CA005769 | BQ664925 |
| CN880925 | CN891218 | BQ871985 | BQ875765 | CA005778 | CA009256 |
| CN880925 | CN906559 | BQ871994 | BQ871561 | CA005898 | CA010817 |
| CN880925 | CN919690 | BQ871994 | BQ872220 | CA005997 | CA010817 |
| CN880925 | CN942163 | BQ871994 | BQ873328 | CA006008 | CA014235 |
| CN880925 | CN949198 | BQ872126 | BQ846231 | CA006008 | CA014497 |
| CN881065 | CN943823 | BQ872144 | BQ863260 | CA006008 | CA014524 |

|          |          |          |          |          |          |
|----------|----------|----------|----------|----------|----------|
| CN881180 | CN948774 | BQ872163 | DY975786 | CA006041 | CA009015 |
| CN881300 | CN859584 | BQ872168 | BQ873588 | CA006109 | CA010817 |
| CN881358 | CN873929 | BQ872190 | BQ873588 | CA006140 | CA024307 |
| CN881358 | CN907126 | BQ872206 | DW137491 | CA006669 | CA002637 |
| CN881358 | CN907280 | BQ872234 | BQ873588 | CA006669 | CA033033 |
| CN881358 | CN942901 | BQ872238 | BQ875579 | CA006671 | CK123004 |
| CN881358 | CN943538 | BQ872317 | BQ872596 | CA006845 | CA006939 |
| CN881358 | CN948123 | BQ872351 | BQ866262 | CA006845 | CA007097 |
| CN881417 | EB148425 | BQ872360 | BQ873588 | CA006883 | AL508104 |
| CN881431 | CN882643 | BQ872371 | BQ871653 | CA006998 | CA002571 |
| CN881452 | CN944483 | BQ872371 | BQ871828 | CA007102 | CA004123 |
| CN881459 | EB119560 | BQ872371 | BQ875579 | CA007442 | BQ467003 |
| CN881459 | EB124113 | BQ872402 | BQ849607 | CA007804 | AL500480 |
| CN881459 | EB131765 | BQ872434 | BQ858336 | CA007828 | AL508104 |
| CN881459 | EB133622 | BQ872508 | BQ853640 | CA007932 | BQ465065 |
| CN881459 | EB134458 | BQ872509 | BQ874832 | CA007956 | BU998718 |
| CN881459 | EB135387 | BQ872533 | DW139206 | CA008059 | CB874381 |
| CN881459 | EB136501 | BQ872554 | BQ849562 | CA008208 | AL450957 |
| CN881459 | EB136941 | BQ872626 | BQ874370 | CA008380 | AL500480 |
| CN881487 | CN882091 | BQ872627 | BQ872596 | CA008403 | BQ465534 |
| CN881487 | CN901397 | BQ872635 | BQ858649 | CA008466 | BQ466130 |
| CN881522 | EB149092 | BQ872635 | BQ862331 | CA008479 | CA012512 |
| CN881529 | EB147413 | BQ872635 | BQ863568 | CA008487 | BQ662789 |
| CN881553 | EB149092 | BQ872635 | BQ864722 | CA008487 | CA005539 |
| CN881625 | CN922253 | BQ872635 | BQ864896 | CA008627 | AL508104 |
| CN881667 | CN907355 | BQ872635 | BQ865540 | CA008638 | AL508104 |
| CN881667 | CN948123 | BQ872635 | BQ871538 | CA008660 | BQ465699 |
| CN881667 | EB148133 | BQ872635 | BQ873015 | CA008660 | BQ662278 |
| CN881667 | EB148180 | BQ872635 | BQ874915 | CA008660 | BQ662991 |
| CN881844 | CN890134 | BQ872635 | DY970935 | CA008660 | BQ662995 |
| CN881844 | CN891430 | BQ872675 | DW127406 | CA008660 | BQ664662 |
| CN881844 | CN894402 | BQ872703 | BQ871653 | CA008660 | CA000130 |
| CN881844 | CN906559 | BQ872703 | BQ875579 | CA008660 | CA006104 |
| CN881844 | CN919462 | BQ872716 | BQ874832 | CA008660 | CA008573 |
| CN881865 | CN873929 | BQ872741 | BQ872692 | CA008660 | CA010172 |
| CN881872 | CN881681 | BQ872749 | BQ875767 | CA008660 | CA010401 |
| CN881872 | CN907246 | BQ872752 | BQ874832 | CA008660 | CA010607 |
| CN881872 | CN919240 | BQ872771 | BQ858088 | CA008660 | CA010676 |
| CN881872 | CN934605 | BQ872794 | BQ872692 | CA008660 | CA010842 |
| CN881872 | CN938978 | BQ872809 | BQ853640 | CA008660 | CA010935 |
| CN881872 | CN940031 | BQ872845 | BQ858088 | CA008660 | CA011273 |
| CN881872 | CN941534 | BQ872847 | BQ873588 | CA008660 | CA011304 |
| CN881872 | CN941566 | BQ872864 | BQ853640 | CA008660 | CA011375 |
| CN881872 | CN943728 | BQ872874 | BQ872692 | CA008660 | CA011439 |
| CN881872 | CN946809 | BQ872891 | BQ853640 | CA008660 | CA012747 |
| CN881872 | CN947320 | BQ872894 | BQ873588 | CA008662 | AL508104 |
| CN881872 | CN948638 | BQ872901 | BQ858088 | CA008802 | AL500480 |
| CN881872 | EB148133 | BQ872911 | DY970139 | CA008816 | BQ458473 |
| CN881872 | EB148478 | BQ872911 | DY974997 | CA008875 | CA020051 |
| CN881872 | EB148493 | BQ873012 | BQ873588 | CA008913 | CA007196 |
| CN881891 | EB147413 | BQ873039 | BQ849562 | CA009036 | CK123031 |
| CN881892 | CN855993 | BQ873084 | BQ859809 | CA009051 | CB882148 |

|          |          |          |          |          |          |
|----------|----------|----------|----------|----------|----------|
| CN881892 | CN856223 | BQ873085 | BQ874832 | CA009109 | CA002571 |
| CN881892 | CN857349 | BQ873092 | BQ852054 | CA009118 | CA018747 |
| CN881917 | CN894280 | BQ873106 | BQ873588 | CA009192 | BU976614 |
| CN881922 | CN891226 | BQ873125 | BQ860792 | CA009247 | BU994640 |
| CN881922 | CN906648 | BQ873139 | BQ873588 | CA009254 | CA014652 |
| CN881922 | CN930820 | BQ873141 | BQ853342 | CA009331 | AL508104 |
| CN881922 | CN940780 | BQ873141 | BQ853640 | CA009416 | CA012512 |
| CN881973 | CN882643 | BQ873170 | DY981611 | CA009518 | BQ465065 |
| CN882017 | EB148407 | BQ873172 | BQ863260 | CA009553 | BQ465065 |
| CN882151 | CN864594 | BQ873187 | BQ872323 | CA009567 | BQ662789 |
| CN882271 | CN906007 | BQ873227 | BQ872596 | CA009572 | AL508104 |
| CN882271 | CN906012 | BQ873262 | DY963348 | CA009574 | BQ662789 |
| CN882271 | CN948308 | BQ873275 | BQ853342 | CA009574 | CA005539 |
| CN882313 | CN862980 | BQ873275 | BQ853640 | CA009628 | BQ466130 |
| CN882313 | CN877096 | BQ873302 | BQ873588 | CA009737 | CA031620 |
| CN882313 | CN905479 | BQ873330 | BQ873588 | CA009921 | BQ663492 |
| CN882313 | CN941257 | BQ873349 | BQ871914 | CA009964 | BE420612 |
| CN882361 | CN887600 | BQ873381 | BQ853640 | CA009964 | BQ662751 |
| CN882361 | CN938112 | BQ873405 | BQ873588 | CA009964 | BQ663403 |
| CN882396 | CN894660 | BQ873413 | BQ853640 | CA009964 | CA005467 |
| CN882517 | CN882643 | BQ873414 | BQ871430 | CA009964 | CA005720 |
| CN882636 | CN856223 | BQ873415 | DW126527 | CA009964 | CA006214 |
| CN882656 | CN880431 | BQ873424 | DW134970 | CA009964 | CB876507 |
| CN882779 | CN868647 | BQ873495 | BQ863818 | CA010080 | CA010817 |
| CN882779 | CN901903 | BQ873502 | BQ872323 | CA010142 | BQ466395 |
| CN882785 | CN907153 | BQ873528 | BQ853692 | CA010142 | CA002756 |
| CN882785 | CN919342 | BQ873528 | BQ856810 | CA010142 | CA011689 |
| CN882785 | EB147817 | BQ873528 | BQ874699 | CA010150 | BQ466458 |
| CN882811 | CN880431 | BQ873528 | BQ875068 | CA010150 | BQ662466 |
| CN882814 | EB150180 | BQ873537 | BQ871827 | CA010150 | BQ662877 |
| CN882824 | EB148425 | BQ873569 | BQ871561 | CA010150 | CA000130 |
| CN882876 | CN906640 | BQ873569 | BQ873328 | CA010150 | CA005622 |
| CN882984 | EB149092 | BQ873590 | DY972481 | CA010150 | CA008313 |
| CN883034 | CN891226 | BQ873619 | BQ865551 | CA010150 | CA010172 |
| CN883034 | CN906648 | BQ873682 | BQ874832 | CA010150 | CA010401 |
| CN883034 | CN930820 | BQ873712 | BQ873676 | CA010150 | CA010429 |
| CN883057 | EB145722 | BQ873720 | BQ853342 | CA010150 | CA010676 |
| CN883253 | CN869163 | BQ873745 | DY983576 | CA010150 | CA011023 |
| CN883332 | CN906951 | BQ873756 | BQ873588 | CA010150 | CA011456 |
| CN883332 | CN907246 | BQ873765 | BQ856092 | CA010150 | CA011561 |
| CN883332 | CN907280 | BQ873765 | BQ856362 | CA010150 | CA011729 |
| CN883332 | CN907350 | BQ873765 | BQ867223 | CA010150 | CA012405 |
| CN883332 | CN907355 | BQ873765 | DW141019 | CA010150 | CA012834 |
| CN883332 | CN930734 | BQ873765 | DY965167 | CA010150 | CA013298 |
| CN883332 | CN945200 | BQ873765 | DY980259 | CA010150 | CA014094 |
| CN883332 | CN948142 | BQ873818 | BQ873588 | CA010150 | CA017173 |
| CN883332 | CN948761 | BQ873839 | BQ853640 | CA010335 | CA006628 |
| CN883332 | EB147518 | BQ873853 | BQ858088 | CA010355 | BQ467003 |
| CN883332 | EB148665 | BQ873857 | BQ870982 | CA010359 | CB858378 |
| CN883427 | CN942960 | BQ873900 | BQ873667 | CA010397 | AL509686 |
| CN883553 | CN902252 | BQ873900 | BQ875767 | CA010406 | CA009256 |
| CN883583 | CN894660 | BQ873903 | DY962817 | CA010418 | BQ466458 |

|          |          |          |          |          |          |
|----------|----------|----------|----------|----------|----------|
| CN883711 | CN946869 | BQ873904 | BQ858088 | CA010418 | BQ466469 |
| CN883711 | EB124382 | BQ873932 | BQ853640 | CA010418 | BQ472060 |
| CN883711 | EB149631 | BQ873952 | BQ874832 | CA010418 | BQ662466 |
| CN883734 | CN888329 | BQ873970 | BQ872163 | CA010418 | BQ662621 |
| CN883734 | CN888445 | BQ873970 | BQ872555 | CA010418 | BQ662877 |
| CN883734 | CN893711 | BQ873970 | BQ874449 | CA010418 | BQ663059 |
| CN883740 | CN938679 | BQ873986 | BQ858088 | CA010418 | CA000127 |
| CN883816 | CN944147 | BQ874002 | BQ849824 | CA010418 | CA000130 |
| CN883822 | CN882702 | BQ874038 | BQ873588 | CA010418 | CA005622 |
| CN883902 | CN941276 | BQ874059 | BQ862347 | CA010418 | CA005727 |
| CN883950 | CN882643 | BQ874091 | BQ852199 | CA010418 | CA006104 |
| CN883975 | EB149092 | BQ874091 | BQ853843 | CA010418 | CA006351 |
| CN883984 | CN868453 | BQ874091 | BQ855330 | CA010418 | CA008313 |
| CN884105 | CN868647 | BQ874091 | BQ855615 | CA010418 | CA010172 |
| CN884105 | CN901903 | BQ874091 | BQ856470 | CA010418 | CA010392 |
| CN884107 | CN941276 | BQ874091 | BQ857073 | CA010418 | CA010395 |
| CN884168 | CN880444 | BQ874091 | BQ858718 | CA010418 | CA010401 |
| CN884219 | EB119560 | BQ874091 | BQ862025 | CA010418 | CA010421 |
| CN884219 | EB126620 | BQ874091 | BQ862182 | CA010418 | CA010429 |
| CN884219 | EB130601 | BQ874091 | BQ863525 | CA010418 | CA010547 |
| CN884219 | EB132298 | BQ874091 | DW128380 | CA010418 | CA010676 |
| CN884219 | EB133030 | BQ874091 | DW137681 | CA010418 | CA010690 |
| CN884219 | EB136816 | BQ874091 | DY976484 | CA010418 | CA011023 |
| CN884219 | EB157169 | BQ874099 | BQ871561 | CA010418 | CA011273 |
| CN884470 | EB149092 | BQ874099 | BQ873328 | CA010418 | CA011319 |
| CN884586 | CN945463 | BQ874133 | BQ853342 | CA010418 | CA011456 |
| CN884593 | CN873929 | BQ874139 | BQ871828 | CA010418 | CA011561 |
| CN884593 | CN907126 | BQ874153 | BQ871653 | CA010418 | CA011729 |
| CN884593 | CN942901 | BQ874153 | BQ875579 | CA010418 | CA012405 |
| CN884593 | CN943538 | BQ874180 | BQ853342 | CA010418 | CA012561 |
| CN884593 | CN948123 | BQ874180 | BQ853640 | CA010418 | CA012834 |
| CN884606 | CN942130 | BQ874213 | BQ849562 | CA010418 | CA013055 |
| CN884706 | CN894660 | BQ874220 | BQ853342 | CA010418 | CA013285 |
| CN884729 | CN880444 | BQ874229 | BQ853016 | CA010418 | CA013298 |
| CN885021 | CN873929 | BQ874229 | BQ860402 | CA010418 | CA014094 |
| CN885021 | CN881681 | BQ874229 | BQ872287 | CA010418 | CA014612 |
| CN885021 | CN934605 | BQ874232 | BQ873588 | CA010418 | CA015091 |
| CN885021 | CN941566 | BQ874234 | BQ874723 | CA010418 | CA017173 |
| CN885021 | CN943728 | BQ874246 | BQ873588 | CA010489 | CK122301 |
| CN885021 | CN948638 | BQ874260 | DY968484 | CA010562 | BQ657747 |
| CN885021 | EB148133 | BQ874263 | BQ849562 | CA010562 | BU977032 |
| CN885021 | EB148478 | BQ874280 | DW135731 | CA010716 | CA012512 |
| CN885021 | EB148493 | BQ874311 | DY967083 | CA010732 | CA010817 |
| CN885056 | CN889701 | BQ874330 | BQ875579 | CA010762 | BQ466458 |
| CN885066 | CN889701 | BQ874340 | DY978355 | CA010762 | BQ662278 |
| CN885119 | CN885848 | BQ874385 | BQ875638 | CA010762 | BQ662466 |
| CN885126 | CN885848 | BQ874397 | BQ855262 | CA010762 | BQ662621 |
| CN885134 | CN885848 | BQ874434 | BQ871914 | CA010762 | BQ662877 |
| CN885140 | CN848778 | BQ874440 | BQ858088 | CA010762 | BQ662991 |
| CN885140 | CN849007 | BQ874463 | BQ873588 | CA010762 | BQ662995 |
| CN885140 | CN849952 | BQ874473 | BQ873815 | CA010762 | BQ663059 |
| CN885140 | CN890134 | BQ874494 | BQ857452 | CA010762 | BQ664122 |

|          |          |          |          |          |          |
|----------|----------|----------|----------|----------|----------|
| CN885140 | CN890460 | BQ874494 | BQ862177 | CA010762 | CA000127 |
| CN885140 | CN891430 | BQ874494 | BQ864291 | CA010762 | CA000130 |
| CN885140 | CN894402 | BQ874494 | BQ870808 | CA010762 | CA005622 |
| CN885140 | CN901764 | BQ874494 | BQ873339 | CA010762 | CA005727 |
| CN885140 | CN903589 | BQ874494 | BQ875000 | CA010762 | CA006104 |
| CN885140 | CN906559 | BQ874495 | BQ853342 | CA010762 | CA006351 |
| CN885140 | CN919462 | BQ874513 | BQ858088 | CA010762 | CA010166 |
| CN885140 | CN949198 | BQ874518 | BQ873588 | CA010762 | CA010172 |
| CN885154 | CN851905 | BQ874547 | BQ873588 | CA010762 | CA010392 |
| CN885154 | CN864970 | BQ874554 | BQ873588 | CA010762 | CA010395 |
| CN885154 | CN865133 | BQ874588 | BQ873588 | CA010762 | CA010401 |
| CN885154 | CN888038 | BQ874612 | BQ853640 | CA010762 | CA010421 |
| CN885154 | CN890134 | BQ874633 | BQ874832 | CA010762 | CA010429 |
| CN885154 | CN890460 | BQ874674 | BQ865551 | CA010762 | CA010547 |
| CN885154 | CN891218 | BQ874715 | BQ867116 | CA010762 | CA010607 |
| CN885154 | CN906559 | BQ874720 | BQ874538 | CA010762 | CA010676 |
| CN885154 | CN942163 | BQ874731 | BQ871653 | CA010762 | CA010690 |
| CN885154 | CN949198 | BQ874731 | BQ875579 | CA010762 | CA010842 |
| CN885173 | CN885848 | BQ874771 | BQ858088 | CA010762 | CA010935 |
| CN885175 | CN893747 | BQ874811 | BQ846658 | CA010762 | CA011008 |
| CN885210 | CN885848 | BQ874848 | BQ853640 | CA010762 | CA011023 |
| CN885213 | CN888038 | BQ874900 | BQ873588 | CA010762 | CA011042 |
| CN885213 | CN890134 | BQ874951 | BQ873667 | CA010762 | CA011074 |
| CN885213 | CN891218 | BQ874951 | BQ875767 | CA010762 | CA011273 |
| CN885213 | CN906559 | BQ874994 | BQ872692 | CA010762 | CA011304 |
| CN885213 | CN942163 | BQ875001 | BQ853640 | CA010762 | CA011375 |
| CN885213 | CN949198 | BQ875008 | BQ853640 | CA010762 | CA011439 |
| CN885216 | CN885848 | BQ875012 | BQ874370 | CA010762 | CA011456 |
| CN885223 | CN885848 | BQ875019 | BQ873588 | CA010762 | CA011561 |
| CN885230 | CN885848 | BQ875046 | BQ871561 | CA010762 | CA012405 |
| CN885246 | CN885848 | BQ875046 | BQ873328 | CA010762 | CA012561 |
| CN885252 | CN885848 | BQ875130 | BQ853342 | CA010762 | CA012747 |
| CN885262 | CN885848 | BQ875130 | BQ853640 | CA010762 | CA013055 |
| CN885274 | CN885848 | BQ875158 | BQ849562 | CA010762 | CA013285 |
| CN885363 | CN885848 | BQ875170 | BQ873588 | CA010762 | CA013298 |
| CN885366 | CN885848 | BQ875182 | DY961400 | CA010762 | CA013327 |
| CN885369 | CN885848 | BQ875185 | BQ858088 | CA010762 | CA015091 |
| CN885384 | CN885848 | BQ875197 | BQ873588 | CA010762 | CA017173 |
| CN885390 | CN885848 | BQ875233 | BQ872413 | CA010886 | AL510577 |
| CN885393 | CN885848 | BQ875247 | BQ862347 | CA010886 | AL511311 |
| CN885397 | CN885848 | BQ875249 | BQ870982 | CA010886 | AL511500 |
| CN885417 | CN885848 | BQ875272 | BQ858336 | CA010886 | CA021156 |
| CN885432 | CN885848 | BQ875291 | DY983576 | CA010886 | CA023871 |
| CN885455 | CN885848 | BQ875324 | BQ849562 | CA010886 | CB877885 |
| CN885456 | CN885848 | BQ875347 | BQ853640 | CA010905 | CA006287 |
| CN885537 | CN885848 | BQ875354 | BQ858088 | CA011043 | BQ459898 |
| CN885546 | CN885848 | BQ875355 | BQ860792 | CA011043 | CA005912 |
| CN885551 | CN885848 | BQ875396 | BQ875767 | CA011197 | CA009015 |
| CN885612 | CN885848 | BQ875412 | BQ872596 | CA011488 | CA009015 |
| CN885628 | CN885848 | BQ875475 | BQ870027 | CA011530 | AL510557 |
| CN885645 | CN885848 | BQ875515 | BQ859898 | CA011530 | AL512066 |
| CN885675 | CN848778 | BQ875515 | BQ860749 | CA011548 | CA009015 |

|          |          |          |          |          |          |
|----------|----------|----------|----------|----------|----------|
| CN885675 | CN851594 | BQ875515 | DW124431 | CA011770 | AL508104 |
| CN885675 | CN863949 | BQ875515 | DW137273 | CA011772 | CB882148 |
| CN885675 | CN890134 | BQ875518 | BQ873588 | CA011978 | CA008201 |
| CN885675 | CN891430 | BQ875529 | DY967389 | CA012043 | CA002763 |
| CN885675 | CN894402 | BQ875542 | BQ870982 | CA012657 | CA002571 |
| CN885675 | CN901764 | BQ875547 | BQ856455 | CA012698 | BQ662789 |
| CN885675 | CN906559 | BQ875553 | BQ853640 | CA012712 | CA012471 |
| CN885675 | CN919462 | BQ875570 | BQ875638 | CA012749 | CA013815 |
| CN885675 | CN949198 | BQ875601 | BQ858088 | CA013214 | AL508104 |
| CN885678 | CN885848 | BQ875603 | BQ871914 | CA013226 | CA024060 |
| CN885697 | CN848778 | BQ875642 | DW130912 | CA013290 | AL503457 |
| CN885697 | CN849007 | BQ875644 | BQ853640 | CA013290 | CA032458 |
| CN885697 | CN849952 | BQ875647 | DY968219 | CA013383 | CA009641 |
| CN885697 | CN890134 | BQ875650 | BQ849562 | CA013430 | BU981266 |
| CN885697 | CN890460 | BQ875667 | BQ853640 | CA013430 | BU997840 |
| CN885697 | CN901764 | BQ875672 | BQ872596 | CA013430 | BU999199 |
| CN885697 | CN903589 | BQ875673 | BQ853342 | CA013430 | CA018828 |
| CN885697 | CN906559 | BQ875673 | BQ853640 | CA013430 | CA030741 |
| CN885697 | CN949198 | BQ875681 | BQ853640 | CA013430 | CA031741 |
| CN885699 | CN893747 | BQ875709 | BQ858088 | CA013805 | BU994640 |
| CN885718 | CN885848 | BQ875729 | BQ853640 | CA013964 | CA015272 |
| CN885741 | CN885848 | BQ875738 | BQ874832 | CA014012 | CA012461 |
| CN885757 | CN893747 | BQ875763 | BQ849562 | CA014147 | CA012516 |
| CN885808 | CN885848 | BQ875797 | BQ871653 | CA014214 | AL508104 |
| CN885812 | CN885848 | BQ875797 | BQ871914 | CA014440 | BQ466395 |
| CN885864 | CN848778 | BQ875797 | BQ875579 | CA014440 | CA002756 |
| CN885864 | CN849007 | BQ875818 | BQ874832 | CA014440 | CA011689 |
| CN885864 | CN849952 | BQ875849 | BQ853640 | CA014440 | CA012650 |
| CN885864 | CN890134 | BQ875882 | DY973172 | CA014440 | CA012970 |
| CN885864 | CN890460 | BQ875957 | DY981840 | CA014440 | CA013013 |
| CN885864 | CN901764 | BQ875962 | BQ853342 | CA014440 | CA015098 |
| CN885864 | CN903589 | BQ875962 | BQ853640 | CA014533 | CA010817 |
| CN885864 | CN906559 | BQ876033 | BQ858088 | CA014628 | AL505599 |
| CN885864 | CN949198 | BQ876053 | BQ874930 | CA014952 | AL503457 |
| CN885869 | CN885848 | BQ876073 | BQ857210 | CA014977 | AL503998 |
| CN885891 | CN885848 | BQ876076 | BQ871653 | CA014977 | AL508857 |
| CN885930 | CN885848 | BQ876093 | DY984318 | CA014977 | BU998628 |
| CN885933 | CN885848 | BQ876098 | BQ846658 | CA015065 | CB883616 |
| CN885962 | CN885848 | DW123591 | DW136829 | CA015127 | CA012600 |
| CN886000 | EB135387 | DW123595 | DW125687 | CA015152 | AL508848 |
| CN886016 | CN885848 | DW123595 | DY984423 | CA015152 | BQ463519 |
| CN886040 | CN850513 | DW123655 | DW144132 | CA015152 | BU996863 |
| CN886040 | CN850597 | DW123887 | DW131871 | CA015152 | CA027320 |
| CN886040 | CN851771 | DW123915 | DY979875 | CA015152 | CB858179 |
| CN886040 | CN888959 | DW123928 | DW126527 | CA015152 | CB880756 |
| CN886040 | CN919690 | DW123976 | DY978909 | CA015208 | CA012512 |
| CN886047 | CN885848 | DW123978 | BQ849562 | CA015305 | BU997543 |
| CN886053 | CN885848 | DW123981 | BQ857210 | CA015305 | CA032068 |
| CN886059 | CN885848 | DW123997 | DW142198 | CA015820 | CA010817 |
| CN886095 | CN886373 | DW124002 | DW126698 | CA016026 | CA028850 |
| CN886095 | CN886758 | DW124002 | DW131280 | CA016026 | CB882345 |
| CN886106 | CN885848 | DW124031 | BQ857210 | CA016083 | AL505469 |

|          |          |          |          |          |          |
|----------|----------|----------|----------|----------|----------|
| CN886139 | CN885848 | DW124040 | DW131280 | CA016083 | AL508350 |
| CN886142 | CN885848 | DW124058 | BQ860749 | CA016083 | BU997237 |
| CN886153 | CN885848 | DW124058 | DW138597 | CA016083 | CB874459 |
| CN886164 | CN885848 | DW124183 | DY982205 | CA016724 | CA015135 |
| CN886166 | CN885848 | DW124185 | DW127996 | CA016780 | CB879369 |
| CN886185 | CN851905 | DW124200 | DW133581 | CA016937 | BQ663032 |
| CN886185 | CN864970 | DW124264 | DW127755 | CA016937 | BQ663036 |
| CN886185 | CN865133 | DW124360 | DW132927 | CA016937 | CA010102 |
| CN886185 | CN888038 | DW124440 | DW125687 | CA016937 | CA012341 |
| CN886185 | CN890134 | DW124440 | DY979735 | CA016937 | CA013692 |
| CN886185 | CN890460 | DW124440 | DY984423 | CA016937 | CA014235 |
| CN886185 | CN891218 | DW124489 | DW133503 | CA016937 | CA014497 |
| CN886185 | CN906559 | DW124573 | DW143620 | CA016937 | CA014524 |
| CN886185 | CN942163 | DW124656 | DW136829 | CA016937 | CA015417 |
| CN886185 | CN949198 | DW124673 | DW127996 | CA016937 | CA015494 |
| CN886186 | CN848778 | DW124729 | DY978186 | CA016985 | CA007793 |
| CN886186 | CN850273 | DW124742 | DW135833 | CA017080 | BU976750 |
| CN886186 | CN851594 | DW124742 | DY978970 | CA017186 | BQ458562 |
| CN886186 | CN863949 | DW124840 | DW128350 | CA017186 | BQ462517 |
| CN886186 | CN901764 | DW124976 | DW136883 | CA017186 | BQ463351 |
| CN886186 | CN906559 | DW125004 | DY978663 | CA017186 | BU978733 |
| CN886186 | CN949198 | DW125026 | DW131008 | CA017186 | BU981125 |
| CN886187 | CN885848 | DW125026 | DW131824 | CA017186 | BU981647 |
| CN886192 | CN885848 | DW125026 | DW131902 | CA017186 | CA025254 |
| CN886225 | CN885848 | DW125026 | DW131932 | CA017219 | BQ663674 |
| CN886238 | CN885848 | DW125044 | DW126527 | CA017390 | CA002802 |
| CN886288 | CN885848 | DW125106 | DW126527 | CA017390 | CA030289 |
| CN886311 | CN885848 | DW125109 | DY966640 | CA017484 | BQ657500 |
| CN886335 | CN885848 | DW125153 | DY960068 | CA017779 | BQ463186 |
| CN886336 | CN885848 | DW125153 | DY974954 | CA017813 | CA007101 |
| CN886362 | CN885848 | DW125160 | DW126527 | CA017813 | CA030216 |
| CN886378 | CN885848 | DW125178 | BQ852133 | CA018096 | AL508104 |
| CN886387 | CN893747 | DW125220 | DY984878 | CA018202 | AL450957 |
| CN886388 | CN885848 | DW125232 | DW127040 | CA018352 | AL508104 |
| CN886395 | CN885946 | DW125244 | DW125073 | CA018397 | CA008205 |
| CN886405 | CN885848 | DW125245 | BQ850258 | CA018397 | CA009073 |
| CN886438 | CN893747 | DW125349 | BQ860749 | CA018397 | CA009741 |
| CN886462 | CN885848 | DW125349 | DW138597 | CA018397 | CA025211 |
| CN886484 | CN885848 | DW125370 | DW138598 | CA018589 | BU999106 |
| CN886518 | CN885848 | DW125505 | BQ859898 | CA018624 | AL508104 |
| CN886533 | CN885848 | DW125505 | BQ860749 | CA018626 | BQ459770 |
| CN886540 | CN885848 | DW125505 | DW124431 | CA018626 | BQ657500 |
| CN886542 | CN885848 | DW125505 | DW137273 | CA018722 | CA014503 |
| CN886606 | CN885848 | DW125509 | DY979188 | CA018875 | CA008424 |
| CN886616 | CN885848 | DW125560 | BQ849428 | CA018933 | AL505469 |
| CN886618 | CN893747 | DW125560 | DW127507 | CA018933 | BU997237 |
| CN886620 | CN851905 | DW125560 | DW129327 | CA018933 | CB874459 |
| CN886620 | CN864970 | DW125560 | DW129612 | CA019072 | BQ471607 |
| CN886620 | CN865133 | DW125560 | DW131825 | CA019122 | AL508104 |
| CN886620 | CN890134 | DW125560 | DW141134 | CA019143 | BQ465065 |
| CN886620 | CN890460 | DW125580 | DW124585 | CA019161 | AL501419 |
| CN886620 | CN891218 | DW125580 | DW127569 | CA019161 | BU999349 |



|          |          |          |          |          |          |
|----------|----------|----------|----------|----------|----------|
| CN886642 | CN885848 | DW125580 | DW127664 | CA019161 | CA031556 |
| CN886645 | CN885848 | DW125580 | DW144163 | CA019161 | CB876133 |
| CN886666 | CN885848 | DW125581 | DY983732 | CA019166 | CA012471 |
| CN886688 | CN885848 | DW125589 | DW131446 | CA019509 | BU978993 |
| CN886689 | CN885848 | DW125603 | BQ863260 | CA019533 | CA026241 |
| CN886694 | CN885848 | DW125619 | DW125687 | CA019564 | BQ465065 |
| CN886703 | CN885848 | DW125619 | DY979735 | CA019818 | CA002543 |
| CN886713 | CN885848 | DW125620 | DY961869 | CA019818 | CK123926 |
| CN886725 | CN848778 | DW125620 | DY962361 | CA019955 | AL511532 |
| CN886725 | CN849007 | DW125623 | DW127040 | CA019955 | AL512099 |
| CN886725 | CN849952 | DW125628 | DW138050 | CA019955 | BQ459912 |
| CN886725 | CN890134 | DW125661 | DW126110 | CA019955 | BQ656287 |
| CN886725 | CN890460 | DW125672 | DW125340 | CA019955 | BQ657174 |
| CN886725 | CN901764 | DW125691 | BQ872795 | CA019955 | BU977865 |
| CN886725 | CN903589 | DW125723 | DW136209 | CA019955 | BU979676 |
| CN886725 | CN906559 | DW125737 | DY981324 | CA019955 | BU981851 |
| CN886725 | CN949198 | DW125779 | DW133939 | CA019955 | BU983268 |
| CN886740 | CN893747 | DW125806 | DY966297 | CA019955 | CA022784 |
| CN886804 | CN885848 | DW125806 | DY968664 | CA019955 | CA030247 |
| CN886834 | CN885848 | DW125846 | BQ861537 | CA019955 | CA031457 |
| CN886843 | CN851905 | DW125911 | BQ849562 | CA019986 | CA010817 |
| CN886843 | CN864970 | DW125953 | DW127040 | CA020048 | BQ663674 |
| CN886843 | CN865133 | DW126013 | DW140998 | CA020061 | BQ465065 |
| CN886843 | CN890134 | DW126104 | DY963803 | CA020123 | AL501008 |
| CN886843 | CN890460 | DW126115 | DW141165 | CA020123 | AL501021 |
| CN886843 | CN891218 | DW126152 | BQ857210 | CA020123 | BQ656698 |
| CN886876 | CN848778 | DW126165 | DW129036 | CA020123 | BQ656789 |
| CN886876 | CN850273 | DW126192 | DW127040 | CA020123 | BQ660137 |
| CN886876 | CN850513 | DW126198 | DW134970 | CA020123 | BQ660748 |
| CN886876 | CN850597 | DW126214 | BQ853640 | CA020123 | BQ665262 |
| CN886876 | CN851594 | DW126337 | DY981044 | CA020123 | BQ665318 |
| CN886876 | CN851771 | DW126375 | BQ849562 | CA020123 | BQ665986 |
| CN886876 | CN863949 | DW126403 | DY962817 | CA020123 | BU977384 |
| CN886876 | CN888959 | DW126433 | DW133581 | CA020123 | CA016252 |
| CN886876 | CN901764 | DW126462 | DW126527 | CA020123 | CB858285 |
| CN886876 | CN906559 | DW126487 | DY974457 | CA020123 | CB874769 |
| CN886876 | CN919690 | DW126540 | BQ849948 | CA020123 | CB875654 |
| CN886876 | CN949198 | DW126655 | DW136829 | CA020182 | CA026241 |
| CN886940 | CN885848 | DW126655 | DW143940 | CA020204 | BU994896 |
| CN886942 | CN885848 | DW126655 | DY978068 | CA020204 | CA022440 |
| CN886948 | CN848778 | DW126666 | BQ873588 | CA020427 | AL508815 |
| CN886948 | CN850273 | DW126683 | BQ867754 | CA020427 | BQ459569 |
| CN886948 | CN851594 | DW126689 | BQ859898 | CA020427 | BU983657 |
| CN886948 | CN863949 | DW126689 | BQ860749 | CA020427 | CK124107 |
| CN886948 | CN901764 | DW126689 | BQ868156 | CA020427 | CK125531 |
| CN886948 | CN906559 | DW126689 | DW123577 | CA020483 | AL506900 |
| CN886948 | CN949198 | DW126689 | DW123796 | CA020483 | CA021030 |
| CN886965 | CN885848 | DW126732 | DY964474 | CA020557 | AL508245 |
| CN886977 | EB136414 | DW126769 | DW124698 | CA020557 | CA026206 |
| CN886981 | CN885848 | DW126769 | DY966452 | CA020557 | CA028337 |
| CN886995 | CN885848 | DW126806 | DY981799 | CA020564 | CA028099 |
| CN886996 | CN885848 | DW126857 | DW126393 | CA020647 | BQ463419 |

|          |          |          |          |          |          |
|----------|----------|----------|----------|----------|----------|
| CN887277 | CN857056 | DW126865 | BQ858336 | CA020708 | AL511051 |
| CN887295 | CN887761 | DW126871 | DW126527 | CA020708 | CB876133 |
| CN887295 | CN888878 | DW126896 | DW126527 | CA020708 | CB876211 |
| CN887295 | EB133985 | DW126928 | BQ872880 | CA020708 | CB876512 |
| CN887685 | CN849871 | DW126936 | DY972413 | CA020722 | AL508104 |
| CN887685 | CN850606 | DW126948 | DW134970 | CA020740 | CA027116 |
| CN887685 | CN945575 | DW126990 | BQ856945 | CA020755 | CA012707 |
| CN887698 | CN923719 | DW127031 | BQ873588 | CA020811 | BQ467723 |
| CN887832 | CN921958 | DW127125 | DW133885 | CA020891 | CK123926 |
| CN887862 | CN888389 | DW127125 | DW136046 | CA020906 | BQ656564 |
| CN887862 | CN888598 | DW127125 | DW138259 | CA020906 | CA020383 |
| CN887874 | CN869241 | DW127125 | DY960430 | CA020932 | CA002915 |
| CN887874 | CN879921 | DW127125 | DY960553 | CA020938 | AL501008 |
| CN887874 | CN943203 | DW127125 | DY960964 | CA020938 | AL501021 |
| CN888011 | CN877803 | DW127125 | DY970828 | CA020938 | BQ656698 |
| CN888011 | CN894271 | DW127142 | DW135311 | CA020938 | BQ656789 |
| CN888354 | CN947585 | DW127151 | DY962850 | CA020938 | BQ660137 |
| CN888508 | CN903520 | DW127208 | DW134970 | CA020938 | BQ660748 |
| CN888532 | CN938679 | DW127227 | DW129036 | CA020938 | BQ665234 |
| CN888597 | CN877192 | DW127230 | DW124705 | CA020938 | BQ665262 |
| CN888931 | CN893920 | DW127230 | DW124900 | CA020938 | BQ665318 |
| CN888938 | CN939193 | DW127230 | DW143968 | CA020938 | BQ665986 |
| CN888938 | CN947138 | DW127230 | DW144427 | CA020938 | BU977384 |
| CN888938 | EB124279 | DW127230 | DW144606 | CA020938 | CA016252 |
| CN889033 | CN870049 | DW127230 | DW144808 | CA020938 | CA030340 |
| CN889047 | CN939633 | DW127321 | DY978148 | CA020938 | CA031548 |
| CN889112 | CN895877 | DW127333 | DW124585 | CA020938 | CA033019 |
| CN889271 | CN862800 | DW127333 | DW127569 | CA020938 | CB858285 |
| CN889271 | CN938042 | DW127333 | DW127664 | CA020938 | CB874769 |
| CN889271 | CN939996 | DW127333 | DW144132 | CA020938 | CB874992 |
| CN889271 | CN940005 | DW127333 | DW144163 | CA020938 | CB875654 |
| CN889648 | CN904512 | DW127374 | DW140018 | CA020938 | CK122168 |
| CN889648 | CN906205 | DW127402 | DW127040 | CA020965 | CA013041 |
| CN889683 | CN877275 | DW127411 | DY984115 | CA021029 | CK123333 |
| CN889916 | CN921351 | DW127448 | DW126527 | CA021121 | AL511051 |
| CN889935 | EB146734 | DW127451 | DW124585 | CA021121 | CB876133 |
| CN889985 | CN882643 | DW127451 | DW127569 | CA021278 | BQ469815 |
| CN890245 | CN940581 | DW127451 | DW127664 | CA021278 | BQ665758 |
| CN890418 | CN876937 | DW127451 | DW144132 | CA021278 | CA021282 |
| CN890468 | CN870230 | DW127451 | DW144163 | CA021278 | CA022218 |
| CN890468 | CN879514 | DW127477 | DY979716 | CA021278 | CA022773 |
| CN890468 | CN943203 | DW127487 | BQ856945 | CA021278 | CA023980 |
| CN890469 | CN868520 | DW127502 | DW133581 | CA021278 | CA024747 |
| CN890485 | CN887172 | DW127504 | DY976226 | CA021278 | CA024768 |
| CN890800 | CN876937 | DW127593 | DY962817 | CA021278 | CA025961 |
| CN890801 | CN938983 | DW127597 | BQ853640 | CA021278 | CA027543 |
| CN890825 | CN854547 | DW127702 | DW130921 | CA021278 | CA028198 |
| CN890857 | CN893446 | DW127710 | DW137413 | CA021278 | CA029535 |
| CN890857 | CN941181 | DW127730 | DW134970 | CA021297 | BQ465065 |
| CN890857 | CN942377 | DW127757 | BQ856945 | CA021298 | CA006628 |
| CN890857 | CN942559 | DW127789 | DW134387 | CA021427 | CA023868 |
| CN890864 | CN849061 | DW127811 | BQ857382 | CA021483 | CA032458 |

|          |          |          |          |          |          |
|----------|----------|----------|----------|----------|----------|
| CN890864 | CN895068 | DW127835 | DW124838 | CA021546 | CK124170 |
| CN890864 | CN905253 | DW127839 | DW143528 | CA021546 | CK124697 |
| CN890864 | CN905383 | DW127862 | DW126297 | CA021611 | AL506295 |
| CN890875 | CN942377 | DW127903 | DY968758 | CA021611 | AL509575 |
| CN890875 | CN942559 | DW127908 | DW125770 | CA021611 | BQ663638 |
| CN890940 | CN944147 | DW127922 | BQ855112 | CA021625 | AL511051 |
| CN891004 | CN904379 | DW127922 | DY964797 | CA021625 | CB876133 |
| CN891004 | CN905948 | DW127933 | DW134268 | CA021730 | CA012726 |
| CN891038 | CN881268 | DW127968 | DW128350 | CA021735 | AL511051 |
| CN891044 | CN938379 | DW127973 | DW126004 | CA021813 | AL508104 |
| CN891044 | EB117515 | DW127987 | DW126527 | CA021927 | CA008523 |
| CN891044 | EB117554 | DW127993 | DW128003 | CA021977 | BU976100 |
| CN891044 | EB117757 | DW128090 | DW138054 | CA021977 | BU983236 |
| CN891044 | EB119560 | DW128132 | DY966534 | CA022235 | BQ460282 |
| CN891044 | EB130760 | DW128153 | DY961573 | CA022235 | CA022372 |
| CN891044 | EB135313 | DW128272 | DW131280 | CA022447 | BQ467723 |
| CN891044 | EB136403 | DW128326 | DY976866 | CA022457 | CA012707 |
| CN891044 | EB136732 | DW128335 | DW127669 | CA022499 | BQ467723 |
| CN891044 | EB138035 | DW128397 | BQ859898 | CA022608 | CA012471 |
| CN891044 | EB143372 | DW128397 | BQ860749 | CA022925 | AL508104 |
| CN891044 | EB143832 | DW128397 | DW124431 | CA022968 | BQ465182 |
| CN891044 | EB145496 | DW128397 | DW137273 | CA022968 | CA007728 |
| CN891044 | EB145766 | DW128401 | DW143087 | CA022968 | CA015837 |
| CN891044 | EB157020 | DW128415 | DY982697 | CA022968 | CB875958 |
| CN891044 | EB157087 | DW128424 | DW127040 | CA022968 | CK122159 |
| CN891044 | EB157101 | DW128429 | BQ858542 | CA023110 | AL511051 |
| CN891044 | EB157154 | DW128431 | DW142773 | CA023176 | BQ467723 |
| CN891059 | CN891226 | DW128451 | DY984720 | CA023356 | CA014652 |
| CN891059 | CN906648 | DW128495 | BQ859898 | CA023625 | CB880535 |
| CN891059 | CN930820 | DW128495 | BQ860749 | CA023680 | CA002500 |
| CN891063 | CN849061 | DW128495 | DW123577 | CA023692 | BQ466648 |
| CN891063 | CN895068 | DW128495 | DW123796 | CA023706 | CA012471 |
| CN891063 | CN905253 | DW128495 | DW124431 | CA023706 | CB882148 |
| CN891063 | CN905383 | DW128495 | DW137273 | CA023893 | BQ660528 |
| CN891146 | CN904291 | DW128582 | DW128291 | CA023893 | BU978114 |
| CN891211 | CN874476 | DW128582 | DW131194 | CA023893 | BU999725 |
| CN891214 | CN870230 | DW128582 | DW131395 | CA023985 | AL508104 |
| CN891214 | CN870494 | DW128590 | DY971384 | CA024008 | BU983898 |
| CN891214 | CN879514 | DW128593 | DY976226 | CA024008 | BU999349 |
| CN891214 | CN943203 | DW128611 | BQ850258 | CA024008 | CA031556 |
| CN891333 | EB146734 | DW128641 | DY964143 | CA024008 | CB876211 |
| CN891396 | CN901949 | DW128641 | DY966851 | CA024008 | CB876512 |
| CN891405 | CN848784 | DW128655 | DW126698 | CA024053 | BQ467003 |
| CN891405 | CN852076 | DW128655 | DW131280 | CA024067 | BQ467723 |
| CN891405 | CN862253 | DW128701 | DW127040 | CA024082 | AL506147 |
| CN891405 | CN893405 | DW128791 | DY975879 | CA024082 | BQ458579 |
| CN891405 | CN903941 | DW128861 | DW127161 | CA024082 | BQ459165 |
| CN891405 | CN904967 | DW128897 | DW126805 | CA024082 | BQ656564 |
| CN891405 | CN905674 | DW128994 | DW133646 | CA024082 | BU976453 |
| CN891410 | CN852074 | DW128994 | DW140867 | CA024082 | CA020492 |
| CN891410 | CN862347 | DW129001 | DY968221 | CA024082 | CA021167 |
| CN891410 | CN890465 | DW129064 | DY975568 | CA024082 | CA023429 |

|          |          |          |          |          |          |
|----------|----------|----------|----------|----------|----------|
| CN891410 | CN895125 | DW129168 | DW133503 | CA024082 | CA024074 |
| CN891410 | CN895850 | DW129175 | DW126527 | CA024082 | CA026943 |
| CN891410 | CN904634 | DW129194 | DW133250 | CA024082 | CA028337 |
| CN891410 | CN904967 | DW129194 | DW144859 | CA024219 | CK123923 |
| CN891410 | CN943133 | DW129257 | BQ866360 | CA024301 | BQ465065 |
| CN891413 | CN848777 | DW129353 | BQ850258 | CA024305 | AL508245 |
| CN891413 | CN848784 | DW129416 | DW129148 | CA024305 | BQ458579 |
| CN891413 | CN850016 | DW129428 | DY975259 | CA024305 | CA021714 |
| CN891413 | CN851924 | DW129446 | BQ852907 | CA024305 | CA028446 |
| CN891413 | CN851935 | DW129461 | DW134970 | CA024338 | CA009015 |
| CN891413 | CN852008 | DW129480 | DY960998 | CA024340 | BQ467723 |
| CN891413 | CN852074 | DW129645 | DW142832 | CA024346 | CB884103 |
| CN891413 | CN852085 | DW129666 | DY960012 | CA024346 | CB884107 |
| CN891413 | CN862347 | DW129681 | DY975568 | CA024346 | CB884108 |
| CN891413 | CN890465 | DW129735 | DW131194 | CA024346 | CB884119 |
| CN891413 | CN891110 | DW129735 | DW131395 | CA024346 | CB884122 |
| CN891413 | CN892133 | DW129792 | DW127040 | CA024346 | CB884130 |
| CN891413 | CN892328 | DW129816 | DW127040 | CA024346 | CB884131 |
| CN891413 | CN892668 | DW129836 | DY968221 | CA024346 | CB884137 |
| CN891413 | CN893405 | DW129862 | DW129148 | CA024592 | BQ466648 |
| CN891413 | CN895125 | DW129862 | DY980121 | CA024592 | BQ466970 |
| CN891413 | CN895850 | DW129900 | DW133503 | CA024631 | CA033007 |
| CN891413 | CN902468 | DW129900 | DW133581 | CA024631 | CB876133 |
| CN891413 | CN902700 | DW129907 | DW128843 | CA024721 | AL511051 |
| CN891413 | CN904074 | DW129935 | DY978355 | CA024721 | CB876133 |
| CN891413 | CN904634 | DW129935 | DY983183 | CA024721 | CB876318 |
| CN891413 | CN904967 | DW129957 | DW128843 | CA024763 | CA014652 |
| CN891413 | CN906247 | DW129982 | DY960709 | CA024839 | BQ464934 |
| CN891413 | CN943133 | DW130010 | DW125499 | CA024936 | CA018373 |
| CN891514 | CN921073 | DW130038 | DW144163 | CA025197 | CA018410 |
| CN891514 | CN924802 | DW130072 | DW139773 | CA025197 | CA019274 |
| CN891553 | CN881268 | DW130072 | DW139870 | CA025300 | CB876644 |
| CN891563 | CN904632 | DW130098 | DY979188 | CA025325 | CA012726 |
| CN891564 | CN904666 | DW130104 | DW127569 | CA025425 | AL501419 |
| CN891576 | CN940596 | DW130125 | DW126527 | CA025425 | AL511051 |
| CN891576 | EB119560 | DW130176 | DW142198 | CA025545 | BQ458407 |
| CN891576 | EB126620 | DW130192 | DW133503 | CA025545 | BQ460814 |
| CN891576 | EB130601 | DW130192 | DW133581 | CA025545 | BQ656997 |
| CN891576 | EB131984 | DW130226 | BQ850258 | CA025545 | BQ657242 |
| CN891576 | EB132298 | DW130247 | DY976304 | CA025545 | BQ658205 |
| CN891576 | EB132392 | DW130259 | DW125289 | CA025545 | BU976089 |
| CN891576 | EB133030 | DW130283 | DW127569 | CA025545 | BU979911 |
| CN891576 | EB135819 | DW130337 | BQ853062 | CA025545 | BU980036 |
| CN891576 | EB136816 | DW130348 | DW124585 | CA025545 | BU981041 |
| CN891576 | EB143974 | DW130348 | DW127569 | CA025545 | BU997544 |
| CN891576 | EB157101 | DW130348 | DW127664 | CA025545 | CA015747 |
| CN891576 | EB157169 | DW130348 | DW144163 | CA025545 | CA023485 |
| CN891591 | CN855388 | DW130390 | DW123964 | CA025545 | CA030431 |
| CN891591 | CN856091 | DW130390 | DW126586 | CA025545 | CA030974 |
| CN891591 | CN856105 | DW130390 | DW132751 | CA025545 | CA032317 |
| CN891591 | CN856223 | DW130390 | DW143199 | CA025545 | CB858781 |
| CN891591 | CN857946 | DW130411 | DY969048 | CA025545 | CB858866 |

|          |          |          |          |          |          |
|----------|----------|----------|----------|----------|----------|
| CN891607 | CN870733 | DW130413 | BQ850258 | CA025545 | CB876285 |
| CN891607 | CN905253 | DW130439 | DW131225 | CA025545 | CB877001 |
| CN891607 | CN905383 | DW130465 | DY976698 | CA025629 | AL508104 |
| CN891644 | CN903088 | DW130465 | DY977203 | CA025646 | AL507023 |
| CN891764 | CN851508 | DW130470 | DY977687 | CA025717 | BU993955 |
| CN891801 | CN891590 | DW130581 | DW126527 | CA025717 | CA008523 |
| CN891810 | CN877005 | DW130598 | DW127040 | CA025717 | CA014985 |
| CN891810 | CN883709 | DW130619 | DW126527 | CA025740 | AL507232 |
| CN891811 | CN939633 | DW130665 | DW125303 | CA025740 | BQ656564 |
| CN891823 | CN944678 | DW130700 | BQ860749 | CA025740 | BQ666018 |
| CN891842 | CN850694 | DW130700 | BQ868156 | CA025740 | BU976426 |
| CN891911 | EB120415 | DW130700 | DW123577 | CA025740 | BU976453 |
| CN891916 | CN848778 | DW130748 | DW141356 | CA025740 | CA020383 |
| CN891916 | CN849007 | DW130748 | DW141438 | CA025740 | CA026206 |
| CN891916 | CN849952 | DW130759 | DY980298 | CA025740 | CK124699 |
| CN891916 | CN890134 | DW130777 | DW134970 | CA025813 | AL508104 |
| CN891916 | CN890460 | DW130783 | DW131871 | CA025816 | CA012707 |
| CN891916 | CN901764 | DW130839 | DW125303 | CA025819 | AL508104 |
| CN891916 | CN903589 | DW130915 | DW138418 | CA025869 | CA020696 |
| CN891916 | CN906559 | DW130918 | DW136829 | CA025926 | BQ463419 |
| CN891916 | CN949198 | DW130947 | DW129067 | CA026132 | BQ464795 |
| CN891968 | CN901397 | DW130947 | DW129274 | CA026132 | CA003575 |
| CN892116 | CN869241 | DW130947 | DY961136 | CA026132 | CA006977 |
| CN892116 | CN879921 | DW131009 | BQ858542 | CA026132 | CA025732 |
| CN892116 | CN883940 | DW131045 | DY970235 | CA026176 | BQ470104 |
| CN892116 | CN890972 | DW131066 | DY963127 | CA026176 | BU976260 |
| CN892116 | CN947184 | DW131108 | DW134970 | CA026176 | BU977429 |
| CN892378 | EB147523 | DW131188 | DY960479 | CA026176 | CB860148 |
| CN892549 | EB146734 | DW131189 | DW133899 | CA026176 | CB875796 |
| CN892564 | CN848777 | DW131245 | BQ857210 | CA026187 | AL501419 |
| CN892564 | CN848784 | DW131377 | DY972298 | CA026188 | CA031556 |
| CN892564 | CN850016 | DW131389 | DY984720 | CA026188 | CB876211 |
| CN892564 | CN851924 | DW131463 | BQ855262 | CA026188 | CB876512 |
| CN892564 | CN851935 | DW131539 | BQ859898 | CA026190 | AL511051 |
| CN892564 | CN852008 | DW131539 | BQ860749 | CA026248 | CB882148 |
| CN892564 | CN852076 | DW131539 | DW124431 | CA026316 | AL501419 |
| CN892564 | CN852085 | DW131539 | DW137273 | CA026316 | AL507779 |
| CN892564 | CN862253 | DW131577 | DY973281 | CA026316 | BU983898 |
| CN892564 | CN891110 | DW131580 | DW126905 | CA026316 | BU999349 |
| CN892564 | CN892133 | DW131586 | DW136570 | CA026316 | CA031468 |
| CN892564 | CN892328 | DW131596 | DY967657 | CA026316 | CA031556 |
| CN892564 | CN892668 | DW131614 | BQ843658 | CA026316 | CA033007 |
| CN892564 | CN893405 | DW131614 | BQ843775 | CA026381 | BQ458407 |
| CN892564 | CN895125 | DW131614 | BQ844309 | CA026381 | BQ459627 |
| CN892564 | CN902468 | DW131614 | BQ844336 | CA026381 | BQ460814 |
| CN892564 | CN902700 | DW131614 | BQ844355 | CA026381 | BQ656999 |
| CN892564 | CN903941 | DW131614 | BQ844391 | CA026381 | BQ657242 |
| CN892564 | CN904074 | DW131614 | BQ844497 | CA026381 | BQ658205 |
| CN892564 | CN904967 | DW131614 | BQ844594 | CA026381 | BQ660796 |
| CN892564 | CN905674 | DW131614 | BQ844617 | CA026381 | BU976089 |
| CN892564 | CN906247 | DW131614 | BQ846368 | CA026381 | BU978556 |
| CN892686 | CN849668 | DW131614 | BQ848148 | CA026381 | BU980036 |

|          |          |          |          |          |          |
|----------|----------|----------|----------|----------|----------|
| CN892686 | CN851924 | DW131614 | BQ848209 | CA026381 | BU981041 |
| CN892686 | CN852014 | DW131614 | BQ848390 | CA026381 | BU997210 |
| CN892686 | CN852074 | DW131614 | BQ848553 | CA026381 | BU999456 |
| CN892686 | CN852085 | DW131614 | BQ850486 | CA026381 | CA015747 |
| CN892686 | CN862347 | DW131614 | BQ850820 | CA026381 | CA018236 |
| CN892686 | CN891110 | DW131614 | BQ852083 | CA026381 | CA023485 |
| CN892686 | CN892709 | DW131614 | BQ852491 | CA026381 | CA023581 |
| CN892686 | CN895307 | DW131614 | BQ852794 | CA026381 | CA030431 |
| CN892686 | CN895335 | DW131614 | BQ854417 | CA026381 | CA032499 |
| CN892686 | CN895453 | DW131614 | BQ855828 | CA026381 | CA033016 |
| CN892686 | CN902227 | DW131614 | BQ857367 | CA026381 | CB858571 |
| CN892686 | CN902700 | DW131614 | BQ858015 | CA026381 | CB858781 |
| CN892686 | CN904893 | DW131614 | BQ858296 | CA026381 | CB858866 |
| CN892742 | CN893446 | DW131614 | BQ858487 | CA026381 | CB875022 |
| CN892742 | CN941181 | DW131614 | BQ858550 | CA026381 | CB875558 |
| CN892871 | CN919636 | DW131614 | BQ858574 | CA026381 | CB876285 |
| CN892900 | CN901949 | DW131614 | BQ859221 | CA026381 | CB877001 |
| CN892920 | CN851508 | DW131614 | BQ859528 | CA026381 | CB883545 |
| CN892920 | CN862980 | DW131614 | BQ859567 | CA026381 | CK124688 |
| CN892920 | CN904673 | DW131614 | BQ860053 | CA026381 | CK125157 |
| CN893052 | CN851905 | DW131614 | BQ860187 | CA026603 | BU998245 |
| CN893052 | CN864970 | DW131614 | BQ860581 | CA026603 | CB860148 |
| CN893052 | CN865133 | DW131614 | BQ860877 | CA026673 | BU997557 |
| CN893052 | CN890134 | DW131614 | BQ861457 | CA026714 | BQ463419 |
| CN893052 | CN890460 | DW131614 | BQ862261 | CA026783 | AL508104 |
| CN893052 | CN891218 | DW131614 | BQ862301 | CA026928 | CA004616 |
| CN893052 | CN891430 | DW131614 | BQ863463 | CA026931 | AL507953 |
| CN893052 | CN894402 | DW131614 | BQ864326 | CA027271 | BQ471077 |
| CN893052 | CN906559 | DW131614 | BQ864847 | CA027271 | CA030986 |
| CN893052 | CN919462 | DW131614 | BQ865057 | CA027357 | AL507313 |
| CN893205 | EB117515 | DW131614 | BQ865441 | CA027359 | BU997530 |
| CN893205 | EB117554 | DW131614 | BQ866035 | CA027371 | AL507903 |
| CN893205 | EB117757 | DW131614 | BQ870629 | CA027371 | AL511160 |
| CN893205 | EB119560 | DW131614 | DW126081 | CA027371 | BQ470104 |
| CN893205 | EB130760 | DW131614 | DW132588 | CA027371 | BQ665012 |
| CN893205 | EB133030 | DW131614 | DW132647 | CA027371 | CA026486 |
| CN893205 | EB135869 | DW131614 | DW136488 | CA027371 | CA031231 |
| CN893205 | EB136149 | DW131614 | DW142319 | CA027371 | CB875796 |
| CN893205 | EB136403 | DW131639 | DW127040 | CA027528 | AL507953 |
| CN893205 | EB136414 | DW131659 | DW129274 | CA027670 | AL507903 |
| CN893205 | EB136501 | DW131673 | DW135626 | CA027670 | BQ470104 |
| CN893205 | EB138035 | DW131684 | DW127237 | CA027670 | BQ665012 |
| CN893205 | EB141905 | DW131687 | DW138352 | CA027670 | BU977515 |
| CN893205 | EB157154 | DW131702 | DW127040 | CA027670 | BU977623 |
| CN893365 | CN906061 | DW131712 | BQ860104 | CA027670 | BU978339 |
| CN893365 | CN906648 | DW131712 | DW130237 | CA027670 | CA022781 |
| CN893396 | CN893446 | DW131755 | DY960801 | CA027670 | CA026432 |
| CN893396 | CN941181 | DW131755 | DY970235 | CA027670 | CA026486 |
| CN893476 | CN921351 | DW131755 | DY971821 | CA027670 | CA031231 |
| CN893515 | CN877005 | DW131755 | DY975265 | CA027670 | CB860148 |
| CN893720 | CN876937 | DW131874 | DW133479 | CA027670 | CB875796 |
| CN893756 | EB147413 | DW131906 | DY975958 | CA027678 | BQ467723 |

|          |          |          |          |          |          |
|----------|----------|----------|----------|----------|----------|
| CN893756 | EB149092 | DW131950 | DY963348 | CA027682 | AL507120 |
| CN893777 | CN880448 | DW131966 | BQ852632 | CA027682 | BQ462859 |
| CN893821 | CN855859 | DW131966 | DW134283 | CA027682 | BQ469609 |
| CN893821 | CN856091 | DW131966 | DW135078 | CA027682 | BQ660167 |
| CN893821 | CN856105 | DW131966 | DW135918 | CA027682 | BU998673 |
| CN893821 | CN856820 | DW131966 | DW136374 | CA027682 | CA023066 |
| CN893823 | CN904432 | DW131966 | DW136622 | CA027682 | CA025704 |
| CN893823 | CN942559 | DW131966 | DW137311 | CA027682 | CA026476 |
| CN893833 | CN903088 | DW131966 | DW138387 | CA027682 | CA027068 |
| CN893996 | EB146734 | DW131966 | DW140927 | CA027682 | CA027091 |
| CN894026 | CN894767 | DW131966 | DY967998 | CA027682 | CA030167 |
| CN894074 | CN887191 | DW132003 | DW126698 | CA027682 | CA030556 |
| CN894074 | CN890337 | DW132003 | DW128350 | CA027682 | CA030667 |
| CN894260 | CN938836 | DW132003 | DW131280 | CA027682 | CA030868 |
| CN894278 | CN939633 | DW132011 | DW133401 | CA027682 | CB875910 |
| CN894509 | CN850694 | DW132020 | DW125418 | CA027805 | CB875891 |
| CN894509 | CN851880 | DW132061 | BQ855262 | CA027805 | CB880471 |
| CN894515 | CN936220 | DW132153 | DW127669 | CA027805 | CB881800 |
| CN894622 | CN901949 | DW132234 | DW132147 | CA027820 | BU997557 |
| CN894629 | CN948774 | DW132234 | DW143620 | CA027863 | CA026431 |
| CN894767 | CN894258 | DW132284 | DW127996 | CA027936 | BQ463441 |
| CN894832 | CN851860 | DW132297 | DW125569 | CA027992 | CA032458 |
| CN894832 | CN940951 | DW132297 | DW130709 | CA028119 | AL507313 |
| CN894842 | CN880143 | DW132297 | DW131777 | CA028123 | CB884107 |
| CN894842 | CN888181 | DW132297 | DW137985 | CA028123 | CB884109 |
| CN894842 | CN889729 | DW132297 | DW143476 | CA028123 | CB884122 |
| CN894842 | CN891055 | DW132297 | DW143937 | CA028123 | CB884131 |
| CN894842 | CN891567 | DW132297 | DY978414 | CA028123 | CB884137 |
| CN894842 | CN942237 | DW132297 | DY984586 | CA028207 | CA032082 |
| CN894856 | CN944483 | DW132315 | BQ854286 | CA028208 | AL511051 |
| CN895032 | CN937289 | DW132315 | DY974048 | CA028208 | CB876133 |
| CN895032 | EB148367 | DW132320 | DW137124 | CA028218 | AL504156 |
| CN895059 | CN942483 | DW132320 | DW140996 | CA028218 | AL504222 |
| CN895401 | CN880634 | DW132320 | DY967838 | CA028218 | AL504803 |
| CN895401 | CN881389 | DW132322 | BQ860749 | CA028218 | AL506445 |
| CN895494 | CN848700 | DW132322 | BQ868156 | CA028218 | AL506499 |
| CN895494 | CN938379 | DW132322 | DW123577 | CA028218 | AL506909 |
| CN895494 | CN940596 | DW132369 | DW143940 | CA028218 | AL507365 |
| CN895494 | EB117515 | DW132395 | DW128936 | CA028218 | AL507790 |
| CN895494 | EB117554 | DW132396 | DW126527 | CA028218 | AL507825 |
| CN895494 | EB117757 | DW132452 | DY977687 | CA028218 | AL508529 |
| CN895494 | EB119560 | DW132462 | DW137124 | CA028218 | AL508681 |
| CN895494 | EB126620 | DW132462 | DW140996 | CA028218 | AL511208 |
| CN895494 | EB130601 | DW132462 | DY967838 | CA028218 | BQ463446 |
| CN895494 | EB130760 | DW132627 | DW126017 | CA028218 | BQ465017 |
| CN895494 | EB131984 | DW132636 | BQ852907 | CA028218 | BQ466213 |
| CN895494 | EB132298 | DW132655 | DY966179 | CA028218 | BQ470232 |
| CN895494 | EB132392 | DW132718 | BQ860749 | CA028218 | BQ470691 |
| CN895494 | EB133030 | DW132731 | BQ850258 | CA028218 | BQ471801 |
| CN895494 | EB135313 | DW132737 | DW127857 | CA028218 | BU977887 |
| CN895494 | EB135819 | DW132737 | DW143476 | CA028218 | BU996004 |
| CN895494 | EB136403 | DW132778 | DW125857 | CA028218 | BU997323 |

|          |          |          |          |          |          |
|----------|----------|----------|----------|----------|----------|
| CN895494 | EB136732 | DW132860 | DW125857 | CA028218 | CA022279 |
| CN895494 | EB136816 | DW132887 | DW125857 | CA028218 | CA025495 |
| CN895494 | EB138035 | DW132928 | BQ851648 | CA028218 | CA025800 |
| CN895494 | EB143372 | DW133052 | DY967668 | CA028218 | CA027243 |
| CN895494 | EB143832 | DW133052 | DY973021 | CA028218 | CA028118 |
| CN895494 | EB143974 | DW133069 | DY961445 | CA028218 | CA030959 |
| CN895494 | EB145496 | DW133127 | DW124113 | CA028218 | CA031422 |
| CN895494 | EB145766 | DW133127 | DW128339 | CA028218 | CA031636 |
| CN895494 | EB157020 | DW133169 | DW140925 | CA028218 | CB883121 |
| CN895494 | EB157087 | DW133175 | DW124113 | CA028261 | AL508487 |
| CN895494 | EB157101 | DW133175 | DW126278 | CA028261 | CA031380 |
| CN895494 | EB157154 | DW133175 | DW128212 | CA028261 | CK122131 |
| CN895494 | EB157169 | DW133175 | DW128339 | CA028261 | CK123851 |
| CN895558 | CN902021 | DW133175 | DW131530 | CA028276 | AL507164 |
| CN895587 | CN874836 | DW133175 | DW134456 | CA028276 | AL507185 |
| CN895717 | CN901949 | DW133175 | DW139353 | CA028276 | CK125841 |
| CN895765 | CN862847 | DW133192 | DY983254 | CA028318 | CB878276 |
| CN895797 | CN939633 | DW133242 | BQ849562 | CA028564 | CB876133 |
| CN895967 | CN887191 | DW133244 | DW133581 | CA028564 | CB876512 |
| CN895967 | CN890337 | DW133323 | BQ858880 | CA028626 | AL501419 |
| CN895968 | CN890134 | DW133337 | DY971408 | CA028751 | AL508104 |
| CN895968 | CN891430 | DW133349 | DW137158 | CA028838 | CA029826 |
| CN895968 | CN919462 | DW133384 | BQ855779 | CA028877 | AL504955 |
| CN895991 | CN902101 | DW133384 | DW132661 | CA028921 | BQ663674 |
| CN896034 | EB146734 | DW133430 | DY979056 | CA029220 | CA014652 |
| CN901306 | CN849520 | DW133435 | DY970239 | CA029393 | CA025615 |
| CN901306 | CN850223 | DW133474 | DW140050 | CA029652 | CA012707 |
| CN901306 | CN891608 | DW133474 | DW140451 | CA029660 | CA020051 |
| CN901306 | CN895550 | DW133474 | DY963253 | CA029686 | CA029830 |
| CN901306 | CN940701 | DW133474 | DY969213 | CA029754 | CB883595 |
| CN901306 | EB120258 | DW133474 | DY972283 | CA029820 | BQ458407 |
| CN901306 | EB130037 | DW133476 | DY976726 | CA029820 | BQ459627 |
| CN901388 | CN901607 | DW133489 | DY971920 | CA029820 | BQ657242 |
| CN901447 | CN877056 | DW133523 | DW126017 | CA029820 | BQ658205 |
| CN901461 | CN859826 | DW133560 | DY974201 | CA029820 | BQ660796 |
| CN901467 | CN904432 | DW133601 | DW133085 | CA029820 | CA020746 |
| CN901467 | CN942559 | DW133610 | DY971408 | CA029820 | CA023581 |
| CN901468 | CN903088 | DW133639 | DY970239 | CA029820 | CA030431 |
| CN901514 | EB146734 | DW133641 | DY965779 | CA029820 | CA033016 |
| CN901516 | CN860632 | DW133641 | DY974419 | CA029820 | CB858866 |
| CN901554 | EB117513 | DW133681 | BQ858542 | CA029820 | CB875558 |
| CN901592 | CN888038 | DW133729 | DY971384 | CA029820 | CB876285 |
| CN901592 | CN890134 | DW133746 | DW135416 | CA029854 | AL511532 |
| CN901592 | CN891218 | DW133773 | DW133090 | CA029854 | BQ469610 |
| CN901592 | CN906559 | DW133773 | DY978247 | CA029854 | BQ656287 |
| CN901592 | CN942163 | DW133773 | DY983371 | CA029854 | BU977865 |
| CN901592 | CN949198 | DW133773 | DY984483 | CA029854 | BU979676 |
| CN901681 | CN901474 | DW133793 | DY968129 | CA029854 | BU983268 |
| CN901705 | CN903538 | DW133830 | DY971182 | CA029854 | CA022784 |
| CN901962 | CN850223 | DW133830 | DY977508 | CA029854 | CA030247 |
| CN901962 | CN852020 | DW133887 | DW133229 | CA029854 | CA031457 |
| CN901962 | CN890660 | DW133916 | DW127237 | CA029854 | CA032928 |



|          |          |          |          |          |          |
|----------|----------|----------|----------|----------|----------|
| CN901962 | CN891608 | DW133925 | DY959928 | CA029854 | CK122685 |
| CN901962 | CN895550 | DW133997 | DY973163 | CA029854 | CK125455 |
| CN901962 | CN934952 | DW134051 | DW138597 | CA030047 | CA012471 |
| CN901962 | EB120258 | DW134056 | DW135730 | CA030158 | BQ467723 |
| CN901969 | CN901949 | DW134063 | DW127699 | CA030283 | AL450629 |
| CN902092 | EB147523 | DW134075 | DW133748 | CA030290 | CB876318 |
| CN902156 | CN883840 | DW134075 | DY980692 | CA030345 | CA002910 |
| CN902156 | CN884698 | DW134110 | DW138866 | CA030430 | BQ466583 |
| CN902170 | CN873694 | DW134255 | DW135416 | CA030451 | CA012726 |
| CN902189 | CN901474 | DW134260 | DW137413 | CA030494 | CA012726 |
| CN902216 | CN948094 | DW134287 | DW128843 | CA030494 | CK123031 |
| CN902326 | EB147413 | DW134333 | BQ858549 | CA030575 | CA030894 |
| CN902375 | CN942096 | DW134364 | DW138597 | CA030595 | CA000338 |
| CN902506 | CN888329 | DW134382 | DW127699 | CA030633 | BQ469567 |
| CN902506 | CN888445 | DW134418 | BQ864200 | CA030633 | BQ470766 |
| CN902506 | CN893711 | DW134419 | DY963358 | CA030656 | BQ460364 |
| CN902547 | EB146734 | DW134449 | DY968484 | CA030656 | BQ470988 |
| CN902551 | CN947207 | DW134450 | DY964474 | CA030656 | BU999985 |
| CN902569 | CN862892 | DW134461 | BQ856385 | CA030656 | CA024600 |
| CN902569 | CN887600 | DW134548 | DY971565 | CA030656 | CA033025 |
| CN902569 | CN949184 | DW134578 | BQ860749 | CA030656 | CK125547 |
| CN902637 | CN877844 | DW134722 | DY964477 | CA030762 | CA002910 |
| CN902705 | CN902154 | DW134742 | DW130912 | CA030801 | CA012707 |
| CN902745 | CN942377 | DW134789 | DW126874 | CA030845 | BQ466669 |
| CN902745 | CN942508 | DW134812 | DY975958 | CA030848 | AL511051 |
| CN902854 | CN892663 | DW134816 | DW125506 | CA030871 | CB876133 |
| CN902854 | CN939789 | DW134847 | DY961617 | CA030871 | CB876512 |
| CN902854 | EB147523 | DW134860 | DY961573 | CA030917 | BQ662789 |
| CN903016 | CN936220 | DW134862 | DY963203 | CA030933 | CB876318 |
| CN903017 | CN901949 | DW134975 | DW129067 | CA031098 | BU978114 |
| CN903036 | CN857056 | DW134975 | DW129274 | CA031137 | CB883595 |
| CN903058 | CN848778 | DW134975 | DY961136 | CA031208 | AL503078 |
| CN903058 | CN851594 | DW134976 | DW124553 | CA031208 | AL505955 |
| CN903058 | CN863949 | DW134976 | DW136238 | CA031208 | AL511047 |
| CN903058 | CN901764 | DW134976 | DW137173 | CA031208 | AL512099 |
| CN903058 | CN906559 | DW134976 | DY966140 | CA031208 | BQ458493 |
| CN903058 | CN949198 | DW134976 | DY966346 | CA031208 | BQ460348 |
| CN903092 | CN882929 | DW134976 | DY970517 | CA031208 | BQ470343 |
| CN903133 | CN878065 | DW134976 | DY971352 | CA031208 | BQ471023 |
| CN903133 | CN879134 | DW134977 | DY966854 | CA031208 | BQ471052 |
| CN903242 | CN919345 | DW135017 | BQ859898 | CA031208 | BQ657048 |
| CN903262 | CN905076 | DW135017 | BQ860749 | CA031208 | BQ657116 |
| CN903262 | CN905379 | DW135017 | DW124431 | CA031208 | BQ660439 |
| CN903492 | EB150741 | DW135017 | DW137273 | CA031208 | BQ665694 |
| CN903529 | CN901949 | DW135017 | DW138597 | CA031208 | BQ665856 |
| CN903558 | EB119997 | DW135020 | DW125687 | CA031208 | BU977098 |
| CN903558 | EB130760 | DW135020 | DY984423 | CA031208 | BU977865 |
| CN903558 | EB131039 | DW135043 | DW137028 | CA031208 | BU978785 |
| CN903558 | EB133030 | DW135043 | DW138109 | CA031208 | BU978835 |
| CN903558 | EB135819 | DW135043 | DW143326 | CA031208 | BU979676 |
| CN903558 | EB135869 | DW135043 | DY960060 | CA031208 | BU980103 |
| CN903558 | EB136149 | DW135043 | DY960162 | CA031208 | BU981037 |

|          |          |          |          |          |          |
|----------|----------|----------|----------|----------|----------|
| CN903558 | EB136414 | DW135043 | DY968064 | CA031208 | BU981313 |
| CN903558 | EB136501 | DW135043 | DY979853 | CA031208 | BU981489 |
| CN903558 | EB141905 | DW135142 | DY961573 | CA031208 | BU981716 |
| CN903558 | EB144931 | DW135175 | DY962725 | CA031208 | BU981851 |
| CN903558 | EB145496 | DW135344 | BQ858336 | CA031208 | BU982121 |
| CN903558 | EB146300 | DW135362 | DY968524 | CA031208 | BU982343 |
| CN903558 | EB157154 | DW135393 | DY966054 | CA031208 | BU982479 |
| CN903573 | CN893446 | DW135418 | DW138597 | CA031208 | BU982981 |
| CN903573 | CN941181 | DW135434 | DW133071 | CA031208 | BU983268 |
| CN903656 | CN904432 | DW135476 | BQ873225 | CA031208 | BU983327 |
| CN903656 | CN905076 | DW135488 | DW137672 | CA031208 | CA022784 |
| CN903656 | CN942377 | DW135489 | BQ865551 | CA031208 | CA030247 |
| CN903656 | CN942508 | DW135569 | DY969042 | CA031208 | CA030665 |
| CN903656 | CN942559 | DW135583 | DY959259 | CA031208 | CA030714 |
| CN903880 | CN939522 | DW135623 | DY959234 | CA031208 | CA030781 |
| CN903904 | CN848778 | DW135628 | BQ858542 | CA031208 | CA031094 |
| CN903904 | CN849007 | DW135645 | DY962354 | CA031208 | CA031592 |
| CN903904 | CN849952 | DW135658 | BQ857210 | CA031208 | CA032239 |
| CN903904 | CN850513 | DW135694 | DY961611 | CA031208 | CK122925 |
| CN903904 | CN850597 | DW135721 | BQ870982 | CA031208 | CK123220 |
| CN903904 | CN851771 | DW135830 | DW133882 | CA031208 | CK125455 |
| CN903904 | CN888959 | DW135845 | BQ850258 | CA031233 | CA012726 |
| CN903904 | CN890134 | DW135896 | DW133899 | CA031291 | AL510352 |
| CN903904 | CN890460 | DW135930 | DW136158 | CA031367 | BU997012 |
| CN903904 | CN901764 | DW136003 | DY966896 | CA031394 | CA012471 |
| CN903904 | CN903589 | DW136003 | DY969684 | CA031475 | BQ657500 |
| CN903904 | CN906559 | DW136027 | DW137082 | CA031550 | AL511051 |
| CN903904 | CN919690 | DW136056 | DW129726 | CA031703 | CA023749 |
| CN903904 | CN949198 | DW136057 | DW136570 | CA031730 | AL505493 |
| CN903985 | CN903224 | DW136115 | DW133229 | CA031730 | CA026285 |
| CN903986 | CN904432 | DW136167 | DY974106 | CA031854 | BQ458407 |
| CN903986 | CN942377 | DW136170 | DY985036 | CA031854 | BQ459627 |
| CN903986 | CN942559 | DW136195 | DY962817 | CA031854 | BQ656997 |
| CN903990 | EB146734 | DW136210 | DW134970 | CA031854 | BQ657242 |
| CN904009 | CN848700 | DW136234 | DW134758 | CA031854 | BQ658205 |
| CN904009 | EB119560 | DW136311 | BQ850441 | CA031854 | BQ660796 |
| CN904009 | EB126620 | DW136311 | DW124399 | CA031854 | BU981041 |
| CN904009 | EB130601 | DW136311 | DW127569 | CA031854 | BU997210 |
| CN904009 | EB131984 | DW136311 | DW144163 | CA031854 | CA020746 |
| CN904009 | EB132298 | DW136357 | DY959433 | CA031854 | CA023485 |
| CN904009 | EB132392 | DW136400 | BQ866781 | CA031854 | CA023581 |
| CN904009 | EB133030 | DW136400 | DY973904 | CA031854 | CA030431 |
| CN904009 | EB135819 | DW136443 | BQ859898 | CA031854 | CA033016 |
| CN904009 | EB136816 | DW136443 | BQ860749 | CA031854 | CB858497 |
| CN904009 | EB143974 | DW136443 | BQ868156 | CA031854 | CB858866 |
| CN904009 | EB157101 | DW136443 | DW123577 | CA031854 | CB875558 |
| CN904009 | EB157169 | DW136443 | DW123796 | CA031854 | CB876285 |
| CN904060 | CN878596 | DW136469 | BQ858542 | CA031890 | CA002910 |
| CN904287 | CN901949 | DW136489 | BQ859898 | CA031969 | CA030894 |
| CN904362 | EB119560 | DW136489 | DW123577 | CA032058 | CB876318 |
| CN904362 | EB124113 | DW136489 | DW123796 | CA032065 | CA030894 |
| CN904362 | EB130760 | DW136524 | DY966902 | CA032132 | CA023897 |

|          |          |          |          |          |          |
|----------|----------|----------|----------|----------|----------|
| CN904362 | EB131765 | DW136543 | DW139206 | CA032140 | BU979648 |
| CN904362 | EB133030 | DW136583 | DW129067 | CA032140 | BU999106 |
| CN904362 | EB133622 | DW136583 | DW129274 | CA032166 | CB879833 |
| CN904362 | EB134458 | DW136653 | DY968221 | CA032208 | CB882374 |
| CN904362 | EB135387 | DW136667 | DW128936 | CA032221 | BQ463444 |
| CN904362 | EB135869 | DW136699 | DW127237 | CA032221 | BQ657174 |
| CN904362 | EB136149 | DW136769 | BQ849562 | CA032221 | BQ661009 |
| CN904362 | EB136414 | DW136773 | BQ867210 | CA032221 | BQ664950 |
| CN904362 | EB136501 | DW136807 | DW136936 | CA032221 | BQ665658 |
| CN904362 | EB136941 | DW136815 | DW135761 | CA032221 | BU978835 |
| CN904362 | EB141905 | DW136847 | BQ844860 | CA032221 | BU983268 |
| CN904362 | EB144931 | DW136847 | BQ851008 | CA032221 | BU999624 |
| CN904362 | EB157154 | DW136847 | BQ870796 | CA032221 | CA022784 |
| CN904604 | CN932591 | DW136847 | BQ871454 | CA032221 | CA031457 |
| CN904635 | CN848700 | DW136847 | BQ872108 | CA032221 | CB859667 |
| CN904635 | CN940596 | DW136847 | BQ873281 | CA032335 | BQ464934 |
| CN904635 | EB119560 | DW136847 | BQ873940 | CA032465 | AL508104 |
| CN904635 | EB126620 | DW136847 | BQ875011 | CA032475 | BU998701 |
| CN904635 | EB130601 | DW136847 | BQ875539 | CA032480 | BQ464934 |
| CN904635 | EB131984 | DW136847 | BQ875833 | CA032495 | BQ460282 |
| CN904635 | EB132298 | DW136847 | BQ876039 | CA032495 | CA022372 |
| CN904635 | EB132392 | DW136847 | DW135764 | CA032517 | CA031468 |
| CN904635 | EB133030 | DW136861 | DY982205 | CA032517 | CA031556 |
| CN904635 | EB135819 | DW136902 | DY968221 | CA032517 | CA033007 |
| CN904635 | EB136816 | DW136913 | BQ858542 | CA032517 | CB876133 |
| CN904635 | EB143974 | DW136997 | BQ864977 | CA032579 | BQ465065 |
| CN904635 | EB157101 | DW136997 | DY960209 | CA032640 | CA031556 |
| CN904635 | EB157169 | DW136997 | DY962770 | CA032649 | AL501419 |
| CN904719 | CN905076 | DW137007 | DY965184 | CA032649 | BU999349 |
| CN904719 | CN905379 | DW137061 | DW142412 | CA032649 | CA031468 |
| CN904719 | CN942377 | DW137064 | DY981611 | CA032649 | CA031556 |
| CN904719 | CN942508 | DW137069 | DY961264 | CA032649 | CA033007 |
| CN904719 | CN942559 | DW137123 | BQ859898 | CA032653 | CA026431 |
| CN904869 | CN848895 | DW137123 | BQ860749 | CA032705 | BQ464934 |
| CN904869 | CN848960 | DW137123 | DW123577 | CA032725 | AL509575 |
| CN904869 | CN849923 | DW137123 | DW123796 | CA032725 | CA006548 |
| CN904869 | CN880810 | DW137123 | DW124431 | CA032839 | AL501419 |
| CN904869 | CN885148 | DW137123 | DW137273 | CA032839 | AL511051 |
| CN904869 | CN892329 | DW137142 | DW139916 | CA032852 | CA007225 |
| CN904869 | CN904554 | DW137169 | DY961644 | CA032852 | CA021796 |
| CN904869 | CN906295 | DW137319 | DY972261 | CA032852 | CA029525 |
| CN904987 | CN881668 | DW137339 | BQ861731 | CA032865 | CK122408 |
| CN904987 | CN881774 | DW137454 | DW126698 | CA032986 | BQ467003 |
| CN904987 | CN888353 | DW137454 | DW131280 | CA033052 | CA025655 |
| CN904987 | CN890955 | DW137461 | DY962964 | CB858240 | CB874381 |
| CN904987 | CN891570 | DW137482 | DY974947 | CB858252 | BQ460777 |
| CN904987 | CN891594 | DW137500 | DW133982 | CB858252 | BQ665205 |
| CN904987 | CN891807 | DW137529 | BQ845860 | CB858366 | BQ467980 |
| CN904987 | CN891835 | DW137553 | DW144132 | CB858366 | CA030052 |
| CN904987 | CN892170 | DW137561 | DY971619 | CB858366 | CA031413 |
| CN904987 | CN892280 | DW137586 | DW135416 | CB858366 | CA032849 |
| CN904987 | CN893669 | DW137598 | DW129067 | CB858462 | BQ458562 |

|          |          |          |          |          |          |
|----------|----------|----------|----------|----------|----------|
| CN904987 | CN893935 | DW137598 | DW129274 | CB858462 | BQ462517 |
| CN904987 | CN894798 | DW137598 | DY961136 | CB858462 | BQ463351 |
| CN904987 | CN895935 | DW137660 | DY981637 | CB858462 | BQ470350 |
| CN904987 | CN903109 | DW137726 | DY962316 | CB858462 | BU978733 |
| CN904987 | CN904653 | DW137730 | BQ858542 | CB858462 | BU979727 |
| CN904987 | CN904757 | DW137761 | DW137195 | CB858462 | BU981125 |
| CN904987 | CN905315 | DW137769 | DW133899 | CB858462 | BU981647 |
| CN904987 | CN905350 | DW137790 | DY961136 | CB858462 | BU982636 |
| CN904987 | CN906456 | DW137831 | DW137083 | CB858462 | CA025254 |
| CN904987 | CN907171 | DW137854 | BQ873225 | CB858485 | BQ460694 |
| CN904987 | CN919598 | DW137862 | DW136437 | CB858485 | BQ460777 |
| CN904987 | CN942463 | DW137881 | DW127669 | CB858485 | BQ470938 |
| CN904987 | CN943531 | DW137896 | DY963384 | CB858485 | CA029830 |
| CN904987 | CN943955 | DW137983 | DW133838 | CB858520 | CK124175 |
| CN904987 | CN948198 | DW137983 | DY971384 | CB858533 | BQ458562 |
| CN904987 | EB146935 | DW137983 | DY974703 | CB858533 | BQ462517 |
| CN904987 | EB147249 | DW137989 | BQ873225 | CB858533 | BQ463351 |
| CN904987 | EB147311 | DW137996 | DY961763 | CB858533 | BU981125 |
| CN904987 | EB147402 | DW138000 | BQ869298 | CB858533 | BU981647 |
| CN904987 | EB147566 | DW138035 | DY971129 | CB858550 | BQ460694 |
| CN904987 | EB148271 | DW138039 | DY968221 | CB858550 | BQ460777 |
| CN904987 | EB148286 | DW138074 | DY970034 | CB858550 | BQ470938 |
| CN904987 | EB148443 | DW138082 | BQ858336 | CB858550 | CA029830 |
| CN904987 | EB148527 | DW138121 | BQ851575 | CB858722 | CA029344 |
| CN904987 | EB148688 | DW138136 | DY967299 | CB858904 | CA000828 |
| CN904987 | EB149142 | DW138148 | DY965360 | CB858904 | CA002135 |
| CN904987 | EB149166 | DW138149 | DY967239 | CB858918 | CA005539 |
| CN904987 | EB149460 | DW138159 | BQ860749 | CB858918 | CA007794 |
| CN904987 | EB149539 | DW138190 | DY978417 | CB858926 | BU983898 |
| CN904987 | EB150026 | DW138209 | DW137923 | CB858926 | BU998845 |
| CN904987 | EB150069 | DW138216 | DW139206 | CB858926 | CA022372 |
| CN904987 | EB150367 | DW138226 | DW126527 | CB858926 | CA031556 |
| CN904987 | EB150619 | DW138324 | DW124705 | CB858926 | CB876211 |
| CN904987 | EB150621 | DW138324 | DW124900 | CB858926 | CB876512 |
| CN904987 | EB150843 | DW138324 | DW143968 | CB858975 | AL509535 |
| CN904987 | EB151143 | DW138324 | DW144427 | CB859001 | CB876133 |
| CN904987 | EB151154 | DW138324 | DW144606 | CB859002 | BQ459770 |
| CN905220 | CN877209 | DW138334 | BQ856237 | CB859002 | BQ657500 |
| CN905534 | EB117554 | DW138334 | BQ871700 | CB859165 | AL507953 |
| CN905534 | EB124113 | DW138334 | DW126874 | CB859279 | BQ458407 |
| CN905534 | EB126620 | DW138334 | DW128334 | CB859279 | BQ657242 |
| CN905534 | EB127561 | DW138334 | DW133832 | CB859279 | BQ658205 |
| CN905534 | EB136564 | DW138334 | DW134987 | CB859279 | BU976089 |
| CN905534 | EB137919 | DW138334 | DW136431 | CB859279 | BU981041 |
| CN905534 | EB144931 | DW138334 | DW136501 | CB859279 | CA015747 |
| CN905534 | EB157154 | DW138334 | DW137154 | CB859279 | CA030431 |
| CN905717 | CN903088 | DW138334 | DW137506 | CB859279 | CB858781 |
| CN906017 | CN848700 | DW138334 | DW137910 | CB859279 | CB876285 |
| CN906017 | CN940596 | DW138334 | DW141685 | CB859279 | CB877001 |
| CN906017 | EB119560 | DW138348 | DW134863 | CB859345 | AL507369 |
| CN906017 | EB126620 | DW138362 | DY984357 | CB859345 | BQ657122 |
| CN906017 | EB130601 | DW138495 | DW127040 | CB859345 | BQ664781 |

|          |          |          |          |          |          |
|----------|----------|----------|----------|----------|----------|
| CN906017 | EB131984 | DW138669 | DW138054 | CB859345 | CA014748 |
| CN906017 | EB132298 | DW138670 | DY969848 | CB859345 | CA031992 |
| CN906017 | EB132392 | DW138710 | DY976156 | CB859387 | CA005178 |
| CN906017 | EB133030 | DW138762 | DW137413 | CB859507 | BU978733 |
| CN906017 | EB135819 | DW138804 | DW126698 | CB859507 | CA025254 |
| CN906017 | EB136816 | DW138804 | DW131280 | CB859518 | BQ664186 |
| CN906017 | EB143974 | DW138883 | DY970300 | CB859530 | AL501419 |
| CN906017 | EB157101 | DW138900 | DY967657 | CB859530 | AL511051 |
| CN906017 | EB157169 | DW138905 | DY961978 | CB859530 | CB876133 |
| CN906085 | CN864581 | DW138919 | BQ873225 | CB859732 | BQ469586 |
| CN906112 | CN890131 | DW138940 | DY971129 | CB859732 | BU979727 |
| CN906144 | CN901960 | DW139019 | DW131540 | CB859732 | BU981125 |
| CN906173 | EB117554 | DW139184 | DY977139 | CB859803 | AL501419 |
| CN906173 | EB124113 | DW139203 | DW136717 | CB859841 | BQ458562 |
| CN906173 | EB126620 | DW139203 | DW141450 | CB859841 | BU978733 |
| CN906173 | EB127561 | DW139203 | DY963280 | CB859841 | BU979727 |
| CN906173 | EB130760 | DW139203 | DY971788 | CB859841 | BU982636 |
| CN906173 | EB133030 | DW139238 | DW125641 | CB859841 | CA025254 |
| CN906173 | EB135869 | DW139251 | DY974699 | CB859909 | CA002915 |
| CN906173 | EB136149 | DW139273 | DW131871 | CB859940 | CA023835 |
| CN906173 | EB136414 | DW139274 | DY962817 | CB860186 | CA012707 |
| CN906173 | EB136501 | DW139312 | DY970815 | CB860198 | CA000050 |
| CN906173 | EB136564 | DW139363 | DW129274 | CB874419 | AL501419 |
| CN906173 | EB137919 | DW139386 | DW139125 | CB874419 | CB876133 |
| CN906173 | EB141905 | DW139386 | DY964821 | CB874482 | BQ459517 |
| CN906173 | EB144931 | DW139386 | DY971129 | CB874482 | BQ459912 |
| CN906173 | EB157154 | DW139386 | DY979808 | CB874482 | BQ469610 |
| CN906195 | CN901949 | DW139401 | DW127237 | CB874482 | BQ471052 |
| CN906256 | CN948094 | DW139482 | BQ856357 | CB874482 | BQ664950 |
| CN906363 | CN939633 | DW139485 | BQ844644 | CB874482 | BQ665658 |
| CN906452 | CN938983 | DW139485 | BQ845127 | CB874482 | BU977856 |
| CN906452 | CN939800 | DW139485 | BQ845333 | CB874482 | BU977865 |
| CN906459 | CN936220 | DW139485 | BQ846305 | CB874482 | BU981313 |
| CN906538 | CN848895 | DW139485 | BQ847178 | CB874482 | CA019779 |
| CN906538 | CN848960 | DW139485 | BQ848486 | CB874482 | CA030247 |
| CN906538 | CN849908 | DW139485 | BQ850368 | CB874482 | CA030515 |
| CN906538 | CN891620 | DW139485 | BQ852829 | CB874482 | CA030781 |
| CN906538 | CN895029 | DW139485 | BQ854195 | CB874482 | CA031592 |
| CN906538 | CN906124 | DW139485 | BQ854934 | CB874482 | CB875196 |
| CN906538 | CN906615 | DW139485 | BQ855899 | CB874482 | CK123220 |
| CN906538 | EB150475 | DW139485 | BQ856573 | CB874511 | BQ469586 |
| CN906585 | CN890068 | DW139485 | BQ858044 | CB874511 | BU978733 |
| CN906616 | EB117515 | DW139485 | BQ858722 | CB874511 | BU979727 |
| CN906616 | EB117554 | DW139485 | BQ859445 | CB874511 | CA025254 |
| CN906616 | EB117757 | DW139485 | BQ859828 | CB874533 | BQ462517 |
| CN906616 | EB119560 | DW139485 | BQ861699 | CB874533 | BQ463351 |
| CN906616 | EB130760 | DW139485 | BQ861740 | CB874533 | BQ469586 |
| CN906616 | EB136403 | DW139485 | BQ862804 | CB874533 | BQ469756 |
| CN906616 | EB138035 | DW139485 | BQ865295 | CB874533 | BU977829 |
| CN906616 | EB157154 | DW139485 | BQ865595 | CB874533 | BU981647 |
| CN906649 | CN942096 | DW139485 | BQ866212 | CB874639 | BQ466683 |
| CN906822 | CN938379 | DW139485 | BQ866344 | CB874900 | AL507779 |

|          |          |          |          |          |          |
|----------|----------|----------|----------|----------|----------|
| CN906822 | EB117515 | DW139485 | BQ866433 | CB874900 | BU983898 |
| CN906822 | EB117554 | DW139515 | BQ859898 | CB874900 | CA033007 |
| CN906822 | EB117757 | DW139515 | BQ860749 | CB874962 | CB874621 |
| CN906822 | EB119560 | DW139515 | DW123577 | CB874981 | AL506932 |
| CN906822 | EB130760 | DW139515 | DW123796 | CB874988 | CA016150 |
| CN906822 | EB135313 | DW139541 | DW129067 | CB875018 | BU978976 |
| CN906822 | EB136403 | DW139541 | DW129274 | CB875120 | BQ467003 |
| CN906822 | EB136732 | DW139541 | DY961136 | CB875125 | AL511432 |
| CN906822 | EB138035 | DW139553 | DW125172 | CB875125 | BQ460694 |
| CN906822 | EB143372 | DW139553 | DW127197 | CB875125 | BU999379 |
| CN906822 | EB143832 | DW139553 | DW129020 | CB875125 | BU999725 |
| CN906822 | EB145496 | DW139553 | DW132699 | CB875125 | CA027262 |
| CN906822 | EB145766 | DW139553 | DW133784 | CB875125 | CA029847 |
| CN906822 | EB157020 | DW139553 | DW134099 | CB875125 | CA032955 |
| CN906822 | EB157087 | DW139553 | DW135566 | CB875177 | AL501419 |
| CN906822 | EB157101 | DW139553 | DW136534 | CB875177 | AL511051 |
| CN906822 | EB157154 | DW139553 | DW137005 | CB875183 | CA002915 |
| CN906895 | EB148425 | DW139553 | DW138367 | CB875207 | BU978226 |
| CN906897 | CN879960 | DW139553 | DW139921 | CB875260 | AL501419 |
| CN906897 | CN919240 | DW139553 | DW139924 | CB875260 | BQ460282 |
| CN906897 | CN936965 | DW139553 | DY969139 | CB875260 | BU999349 |
| CN906897 | CN940031 | DW139553 | DY974178 | CB875260 | CA022372 |
| CN906897 | CN941534 | DW139595 | DY965693 | CB875260 | CA031468 |
| CN906897 | CN941566 | DW139655 | DY963928 | CB875260 | CA031556 |
| CN906897 | CN948761 | DW139681 | BQ873225 | CB875260 | CA033007 |
| CN906897 | CN948805 | DW139684 | DW135631 | CB875260 | CB876133 |
| CN906897 | EB148180 | DW139822 | DW137413 | CB875376 | BQ460282 |
| CN906897 | EB148478 | DW139842 | DW126728 | CB875376 | BU999349 |
| CN906897 | EB148759 | DW139872 | BQ850046 | CB875376 | CA022372 |
| CN906919 | CN919575 | DW139872 | BQ851821 | CB875376 | CB876318 |
| CN906919 | CN919580 | DW139872 | DW128153 | CB875394 | CA012707 |
| CN906919 | CN937200 | DW139872 | DW134860 | CB875516 | AL511051 |
| CN906942 | EB157423 | DW139872 | DY961573 | CB875516 | CB876133 |
| CN906958 | CN873929 | DW139880 | DY975050 | CB875523 | AL501419 |
| CN906958 | CN907246 | DW139887 | DY970663 | CB875707 | BU999349 |
| CN906958 | CN919240 | DW139937 | DY962964 | CB875773 | AL503078 |
| CN906958 | CN931638 | DW140027 | BQ859898 | CB875773 | AL505955 |
| CN906958 | CN934605 | DW140027 | BQ860749 | CB875773 | AL510154 |
| CN906958 | CN938978 | DW140027 | BQ868156 | CB875773 | AL512099 |
| CN906958 | CN940031 | DW140027 | DW123577 | CB875773 | BQ458493 |
| CN906958 | CN941534 | DW140027 | DW123796 | CB875773 | BQ471023 |
| CN906958 | CN946809 | DW140067 | DY968221 | CB875773 | BQ471052 |
| CN906958 | CN947320 | DW140106 | DY963314 | CB875773 | BQ657048 |
| CN906992 | CN902021 | DW140133 | DW128003 | CB875773 | BQ660439 |
| CN907023 | EB149092 | DW140143 | DY961304 | CB875773 | BQ665694 |
| CN907057 | CN873929 | DW140148 | DY962817 | CB875773 | BU978785 |
| CN907057 | CN907126 | DW140149 | DY961270 | CB875773 | BU978835 |
| CN907057 | CN907246 | DW140149 | DY979830 | CB875773 | BU979676 |
| CN907057 | CN907280 | DW140168 | DW135957 | CB875773 | BU980103 |
| CN907057 | CN907355 | DW140217 | DW139125 | CB875773 | BU981489 |
| CN907057 | CN919240 | DW140217 | DY979808 | CB875773 | BU981716 |
| CN907057 | CN930734 | DW140281 | DY959928 | CB875773 | BU981851 |

|          |          |          |          |          |          |
|----------|----------|----------|----------|----------|----------|
| CN907057 | CN939782 | DW140319 | DY971129 | CB875773 | BU982343 |
| CN907057 | CN942901 | DW140345 | BQ873225 | CB875773 | BU982479 |
| CN907057 | CN943538 | DW140449 | DY975469 | CB875773 | BU983268 |
| CN907057 | CN948123 | DW140471 | BQ856945 | CB875773 | BU983327 |
| CN907057 | CN948142 | DW140499 | DY959972 | CB875773 | CA022784 |
| CN907057 | EB147518 | DW140504 | DW133756 | CB875773 | CA030247 |
| CN907057 | EB148133 | DW140515 | DW137413 | CB875773 | CA030665 |
| CN907057 | EB148180 | DW140520 | DY971281 | CB875773 | CA030781 |
| CN907057 | EB148493 | DW140537 | DY960068 | CB875773 | CA032239 |
| CN907057 | EB148665 | DW140537 | DY974954 | CB875773 | CK122925 |
| CN907087 | CN873929 | DW140588 | DY967520 | CB875773 | CK123220 |
| CN907087 | CN881681 | DW140588 | DY967711 | CB875773 | CK125455 |
| CN907087 | CN934605 | DW140588 | DY973230 | CB875774 | BU979595 |
| CN907087 | CN941566 | DW140597 | BQ857830 | CB875774 | CA029936 |
| CN907087 | CN943728 | DW140597 | DY979830 | CB875774 | CK122764 |
| CN907087 | CN948638 | DW140608 | DY970815 | CB875843 | BQ466865 |
| CN907087 | EB148133 | DW140639 | DW133899 | CB875858 | BQ464940 |
| CN907087 | EB148478 | DW140655 | DY963473 | CB875858 | BQ663337 |
| CN907087 | EB148493 | DW140672 | BQ844644 | CB875858 | BQ663674 |
| CN907127 | CN919229 | DW140672 | BQ845333 | CB876134 | BQ466683 |
| CN907127 | CN919342 | DW140672 | BQ846052 | CB876171 | CB876211 |
| CN907127 | CN919575 | DW140672 | BQ846184 | CB876171 | CB876512 |
| CN907127 | CN919580 | DW140672 | BQ846305 | CB876205 | BQ657500 |
| CN907127 | CN937200 | DW140672 | BQ847178 | CB876207 | BU981900 |
| CN907127 | CN940104 | DW140672 | BQ848095 | CB876207 | CK123715 |
| CN907127 | EB148112 | DW140672 | BQ848486 | CB876307 | BQ657500 |
| CN907155 | CN907355 | DW140672 | BQ850368 | CB876315 | CA009015 |
| CN907155 | CN939782 | DW140672 | BQ854195 | CB876331 | CB876318 |
| CN907155 | CN943538 | DW140672 | BQ855899 | CB876382 | CA030513 |
| CN907155 | CN948123 | DW140672 | BQ856573 | CB876389 | AL506462 |
| CN907155 | EB148133 | DW140672 | BQ857070 | CB876389 | AL506889 |
| CN907155 | EB148180 | DW140672 | BQ858044 | CB876389 | AL508095 |
| CN907180 | CN873929 | DW140672 | BQ858722 | CB876389 | AL508311 |
| CN907180 | CN934605 | DW140672 | BQ858811 | CB876389 | AL509520 |
| CN907180 | CN941566 | DW140672 | BQ859321 | CB876389 | AL510751 |
| CN907180 | CN943728 | DW140672 | BQ859445 | CB876389 | AL511636 |
| CN907180 | CN948638 | DW140672 | BQ859828 | CB876389 | BQ458464 |
| CN907180 | EB148478 | DW140672 | BQ860650 | CB876389 | BQ458981 |
| CN907180 | EB148493 | DW140672 | BQ861699 | CB876389 | BQ462536 |
| CN907232 | CN873929 | DW140672 | BQ861740 | CB876389 | BQ463274 |
| CN907232 | CN919240 | DW140672 | BQ862290 | CB876389 | BQ469027 |
| CN907232 | CN931638 | DW140672 | BQ862751 | CB876389 | BQ469058 |
| CN907232 | CN934605 | DW140672 | BQ863833 | CB876389 | BQ469512 |
| CN907232 | CN938978 | DW140672 | BQ865295 | CB876389 | BQ469775 |
| CN907232 | CN940031 | DW140672 | BQ866011 | CB876389 | BQ470211 |
| CN907232 | CN941534 | DW140672 | BQ866098 | CB876389 | BQ470422 |
| CN907232 | CN946809 | DW140672 | BQ866212 | CB876389 | BQ471292 |
| CN907232 | CN947320 | DW140672 | BQ866344 | CB876389 | BQ471546 |
| CN907250 | CN891566 | DW140672 | BQ866491 | CB876389 | BQ664227 |
| CN907304 | CN907126 | DW140717 | DY959928 | CB876389 | BQ664899 |
| CN907304 | CN907246 | DW140846 | DW131008 | CB876389 | BQ665074 |
| CN907304 | CN919240 | DW140846 | DW131824 | CB876389 | BU976902 |

|          |          |          |          |          |          |
|----------|----------|----------|----------|----------|----------|
| CN907304 | CN930734 | DW140857 | BQ856460 | CB876389 | BU976903 |
| CN907304 | CN939782 | DW140875 | DW129067 | CB876389 | BU976924 |
| CN907304 | CN948142 | DW140875 | DW129274 | CB876389 | BU977022 |
| CN907304 | EB147518 | DW140875 | DY961136 | CB876389 | BU978089 |
| CN907304 | EB148493 | DW140955 | DW124766 | CB876389 | BU978786 |
| CN907304 | EB148665 | DW141003 | BQ851058 | CB876389 | BU981374 |
| CN907309 | EB147105 | DW141021 | DW133899 | CB876389 | BU983662 |
| CN907322 | CN878903 | DW141071 | DY962850 | CB876389 | BU994468 |
| CN907322 | CN907126 | DW141073 | DY963661 | CB876389 | BU995347 |
| CN907322 | CN907350 | DW141093 | DY979074 | CB876389 | BU996757 |
| CN907322 | CN930709 | DW141196 | DY981210 | CB876389 | BU997091 |
| CN907322 | CN931638 | DW141242 | BQ849562 | CB876389 | BU997868 |
| CN907322 | CN943728 | DW141295 | DW126728 | CB876389 | BU998279 |
| CN907322 | CN945200 | DW141318 | DY961617 | CB876389 | BU998744 |
| CN907322 | CN948142 | DW141321 | BQ858880 | CB876389 | BU998989 |
| CN907322 | CN948761 | DW141325 | DY959253 | CB876389 | BU999684 |
| CN907346 | CN873929 | DW141352 | BQ860749 | CB876389 | CA017904 |
| CN907346 | CN878903 | DW141352 | DW138597 | CB876389 | CA020258 |
| CN907346 | CN907126 | DW141513 | DW131832 | CB876389 | CA020462 |
| CN907346 | CN907280 | DW141518 | DY968391 | CB876389 | CA020949 |
| CN907346 | CN907350 | DW141527 | DY973172 | CB876389 | CA022153 |
| CN907346 | CN919240 | DW141567 | DY962850 | CB876389 | CA022753 |
| CN907346 | CN930709 | DW141605 | DY974201 | CB876389 | CA023820 |
| CN907346 | CN930734 | DW141669 | BQ849562 | CB876389 | CA024063 |
| CN907346 | CN931638 | DW141687 | DY962964 | CB876389 | CA024366 |
| CN907346 | CN934605 | DW141705 | DY963315 | CB876389 | CA024449 |
| CN907346 | CN938978 | DW141705 | DY965269 | CB876389 | CA024665 |
| CN907346 | CN940031 | DW141705 | DY975595 | CB876389 | CA025162 |
| CN907346 | CN941534 | DW141743 | DY965779 | CB876389 | CA025736 |
| CN907346 | CN943728 | DW141743 | DY974419 | CB876389 | CA025886 |
| CN907346 | CN945200 | DW141830 | BQ849562 | CB876389 | CA026321 |
| CN907346 | CN946809 | DW141848 | DY968221 | CB876389 | CA026341 |
| CN907346 | CN947320 | DW141873 | DW131787 | CB876389 | CA027176 |
| CN907346 | CN948142 | DW141873 | DW135166 | CB876389 | CA027304 |
| CN907346 | CN948761 | DW141898 | DY965360 | CB876389 | CA027613 |
| CN907346 | EB147518 | DW141918 | DY968221 | CB876389 | CA027755 |
| CN907346 | EB148493 | DW141945 | DW129289 | CB876389 | CA028219 |
| CN907346 | EB148665 | DW141945 | DW133765 | CB876389 | CA028461 |
| CN907361 | CN873929 | DW141945 | DW142030 | CB876389 | CA028500 |
| CN907361 | CN879960 | DW141961 | DW137826 | CB876389 | CA029278 |
| CN907361 | CN907126 | DW141986 | DY974623 | CB876389 | CA029440 |
| CN907361 | CN907280 | DW142043 | DY964797 | CB876389 | CA029757 |
| CN907361 | CN919240 | DW142086 | DW132927 | CB876389 | CA030683 |
| CN907361 | CN936965 | DW142096 | BQ850258 | CB876389 | CA031024 |
| CN907361 | CN940031 | DW142111 | DW136883 | CB876389 | CA031043 |
| CN907361 | CN941534 | DW142158 | DW126698 | CB876389 | CB859929 |
| CN907361 | CN941566 | DW142158 | DW131280 | CB876389 | CB874391 |
| CN907361 | CN942901 | DW142166 | DW125687 | CB876389 | CB874816 |
| CN907361 | CN943538 | DW142166 | DY979735 | CB876389 | CB875475 |
| CN907361 | CN948123 | DW142193 | BQ850441 | CB876389 | CB875601 |
| CN907361 | CN948761 | DW142193 | DW124399 | CB876389 | CB875823 |
| CN907361 | CN948805 | DW142193 | DW127569 | CB876389 | CB883055 |



|          |          |          |          |          |          |
|----------|----------|----------|----------|----------|----------|
| CN907361 | EB148478 | DW142193 | DW144163 | CB876389 | CK122353 |
| CN907363 | CN919575 | DW142194 | DW131280 | CB876389 | CK125190 |
| CN907363 | CN919580 | DW142241 | DW127237 | CB876399 | CA012179 |
| CN907363 | CN937200 | DW142257 | DY982383 | CB876452 | BQ458407 |
| CN907366 | CN878903 | DW142260 | DY978540 | CB876452 | BQ460814 |
| CN907366 | CN906951 | DW142275 | DW127040 | CB876452 | BQ658205 |
| CN907366 | CN907126 | DW142297 | BQ849562 | CB876452 | CA020746 |
| CN907366 | CN907350 | DW142307 | DW127406 | CB876452 | CA023485 |
| CN907366 | CN907355 | DW142336 | BQ849562 | CB876452 | CA030431 |
| CN907366 | CN930709 | DW142406 | DW135833 | CB876452 | CA030974 |
| CN907366 | CN931638 | DW142406 | DY978970 | CB876452 | CB875558 |
| CN907366 | CN943336 | DW142451 | DW144132 | CB876452 | CB876285 |
| CN907366 | CN943728 | DW142466 | BQ849562 | CB876488 | CB876131 |
| CN907366 | CN945200 | DW142555 | DY977230 | CB876488 | CB876457 |
| CN907366 | CN948142 | DW142646 | DW126393 | CB876523 | BQ662789 |
| CN907366 | CN948761 | DW142858 | DW124654 | CB876523 | CA005539 |
| CN907367 | CN873929 | DW142858 | DW125989 | CB876523 | CA007794 |
| CN907367 | CN881681 | DW142858 | DW127059 | CB876586 | BQ459770 |
| CN907367 | CN934605 | DW142858 | DW142340 | CB876586 | BQ657500 |
| CN907367 | CN941566 | DW142858 | DW143097 | CB876628 | CA014475 |
| CN907367 | CN943728 | DW142858 | DW143285 | CB876647 | CA032972 |
| CN907367 | CN948638 | DW142931 | DY980629 | CB876658 | CB859896 |
| CN907367 | EB148133 | DW142951 | BQ864108 | CB876658 | CK123040 |
| CN907367 | EB148478 | DW142994 | DW132521 | CB877004 | CA028561 |
| CN907367 | EB148493 | DW143089 | DW127040 | CB877164 | CA010817 |
| CN907368 | EB157423 | DW143171 | DW127161 | CB877340 | AL450629 |
| CN907387 | CN855993 | DW143184 | DW139916 | CB877444 | CA020696 |
| CN907387 | CN856223 | DW143184 | DW143826 | CB877455 | BQ459148 |
| CN907387 | CN857349 | DW143186 | DW128525 | CB877525 | CA007794 |
| CN907412 | EB147105 | DW143195 | DW133581 | CB877562 | BQ459148 |
| CN907417 | CN879960 | DW143197 | BQ848368 | CB877801 | AL507164 |
| CN907417 | CN919240 | DW143197 | BQ854322 | CB877801 | CK125841 |
| CN907417 | CN936965 | DW143197 | BQ855921 | CB877879 | BQ459148 |
| CN907417 | CN940031 | DW143197 | BQ861897 | CB878417 | CB876512 |
| CN907417 | CN941534 | DW143208 | BQ867298 | CB878701 | BQ459148 |
| CN907417 | CN941566 | DW143263 | BQ852907 | CB878796 | BQ468279 |
| CN907417 | CN948761 | DW143265 | BQ849562 | CB879514 | BQ465941 |
| CN907417 | CN948805 | DW143307 | DY983479 | CB879514 | BQ465996 |
| CN907417 | EB148180 | DW143318 | DW131008 | CB879514 | BQ663032 |
| CN907417 | EB148478 | DW143318 | DW131824 | CB879514 | CA010287 |
| CN907443 | CN873929 | DW143318 | DW131902 | CB879514 | CA013747 |
| CN907443 | CN879960 | DW143351 | DW142773 | CB879514 | CA014497 |
| CN907443 | CN881681 | DW143355 | DW129289 | CB879683 | AL503225 |
| CN907443 | CN919240 | DW143355 | DW142030 | CB879731 | BU977643 |
| CN907443 | CN934605 | DW143355 | DY978961 | CB879778 | CA005178 |
| CN907443 | CN936965 | DW143375 | DW127669 | CB879877 | BQ463865 |
| CN907443 | CN940031 | DW143380 | DW134970 | CB879877 | CB878009 |
| CN907443 | CN941534 | DW143407 | BQ874938 | CB879886 | BQ459148 |
| CN907443 | CN941566 | DW143417 | BQ849562 | CB879902 | CB876133 |
| CN907443 | CN943728 | DW143447 | DW139916 | CB879955 | BQ664098 |
| CN907443 | CN948638 | DW143487 | DW134970 | CB879955 | BU998418 |
| CN907443 | CN948761 | DW143491 | DW126017 | CB879955 | CA031176 |

|          |          |          |          |          |          |
|----------|----------|----------|----------|----------|----------|
| CN907443 | CN948805 | DW143513 | DW134970 | CB879955 | CB860191 |
| CN907443 | EB148180 | DW143531 | DW144163 | CB879955 | CB875568 |
| CN907443 | EB148478 | DW143660 | BQ850441 | CB879955 | CB875743 |
| CN907443 | EB148493 | DW143660 | DW124399 | CB880031 | CA000338 |
| CN907445 | CN907246 | DW143660 | DW127569 | CB880031 | CA002915 |
| CN907445 | CN919240 | DW143660 | DW144163 | CB880051 | CA010817 |
| CN907445 | CN934605 | DW143713 | BQ849866 | CB880211 | BU994465 |
| CN907445 | CN940031 | DW143854 | DW127237 | CB880211 | CB881027 |
| CN907445 | CN941534 | DW143894 | DW127040 | CB880322 | CA002571 |
| CN907445 | CN946809 | DW143978 | DW127386 | CB880335 | AL511051 |
| CN907445 | CN947320 | DW144005 | DY984442 | CB880706 | BE422239 |
| CN907454 | EB149092 | DW144091 | DW127040 | CB880806 | AL503646 |
| CN907515 | EB147105 | DW144158 | DY973695 | CB880886 | BQ657197 |
| CN907531 | CN941210 | DW144166 | DW127868 | CB880886 | BQ657783 |
| CN907559 | CN873929 | DW144166 | DW142393 | CB880886 | BQ657897 |
| CN907559 | CN881681 | DW144191 | BQ874395 | CB880886 | BU983150 |
| CN907559 | CN907246 | DW144202 | DW128142 | CB880886 | CK123751 |
| CN907559 | CN919240 | DW144219 | DY976581 | CB880886 | CK123794 |
| CN907559 | CN931638 | DW144289 | BQ855262 | CB880886 | CK123827 |
| CN907559 | CN934605 | DW144322 | DY977687 | CB881143 | BU994698 |
| CN907559 | CN940031 | DW144350 | DY978663 | CB881307 | BU976750 |
| CN907559 | CN941534 | DW144398 | DW127406 | CB881308 | CA010817 |
| CN907559 | CN941566 | DW144411 | DW127040 | CB881349 | BQ459912 |
| CN907559 | CN943728 | DW144428 | BQ844728 | CB881349 | BQ460348 |
| CN907559 | CN946809 | DW144442 | DW132147 | CB881349 | BQ657174 |
| CN907559 | CN947320 | DW144524 | DW127406 | CB881349 | BQ664950 |
| CN907559 | CN948638 | DW144544 | BQ850258 | CB881349 | BQ665658 |
| CN907559 | EB148133 | DW144549 | BQ850258 | CB881349 | BU978450 |
| CN907559 | EB148478 | DW144554 | DW139206 | CB881349 | BU978785 |
| CN907559 | EB148493 | DW144564 | DW127669 | CB881349 | BU978835 |
| CN907594 | CN873929 | DW144618 | DW137493 | CB881349 | BU981576 |
| CN907594 | CN907280 | DW144724 | DW140128 | CB881349 | BU982384 |
| CN907594 | CN907350 | DW144826 | DW127406 | CB881349 | BU983223 |
| CN907594 | CN930734 | DW144853 | BQ850441 | CB881349 | BU983268 |
| CN907594 | CN948142 | DW144853 | DW124399 | CB881349 | BU999624 |
| CN907594 | CN948761 | DW144853 | DW127569 | CB881349 | CA030247 |
| CN907594 | EB147518 | DW144853 | DW144163 | CB881349 | CA030714 |
| CN907594 | EB148665 | DW144884 | DY978355 | CB881349 | CB874850 |
| CN907596 | CN879960 | DW144884 | DY983183 | CB881409 | AL507150 |
| CN907596 | CN919240 | DW144900 | DW126527 | CB881409 | BQ471242 |
| CN907596 | CN936965 | DY959284 | BQ867491 | CB881409 | BQ656906 |
| CN907596 | CN940031 | DY959380 | DY972565 | CB881409 | BU978205 |
| CN907596 | CN941534 | DY959386 | BQ865537 | CB881409 | CA031176 |
| CN907596 | CN941566 | DY959402 | DY980919 | CB881409 | CB859609 |
| CN907596 | CN948761 | DY959447 | BQ844446 | CB881409 | CB875743 |
| CN907596 | CN948805 | DY959469 | DY973632 | CB881473 | CA020051 |
| CN907596 | EB148180 | DY959469 | DY984222 | CB881654 | BQ656432 |
| CN907596 | EB148478 | DY959492 | DW137182 | CB881654 | BQ657160 |
| CN907596 | EB148759 | DY959501 | DY978417 | CB881654 | BQ657197 |
| CN907631 | CN879960 | DY959575 | DY968237 | CB881654 | BQ657783 |
| CN907631 | CN919240 | DY959647 | BQ870714 | CB881654 | BQ657897 |
| CN907631 | CN936965 | DY959647 | DW132010 | CB881654 | BQ661192 |

|          |          |          |          |          |          |
|----------|----------|----------|----------|----------|----------|
| CN907631 | CN940031 | DY959653 | DY984811 | CB881654 | BU979920 |
| CN907631 | CN941534 | DY959686 | DY966182 | CB881654 | BU982915 |
| CN907631 | CN941566 | DY959721 | DW133735 | CB881654 | BU983150 |
| CN907631 | CN948761 | DY959755 | DW128035 | CB881654 | BU995099 |
| CN907631 | CN948805 | DY959766 | BQ858542 | CB881654 | BU995430 |
| CN907631 | EB148180 | DY959782 | DW125544 | CB881654 | CA029456 |
| CN907631 | EB148478 | DY959784 | DY959595 | CB881654 | CB858818 |
| CN907631 | EB148759 | DY959976 | DY967083 | CB881654 | CK123312 |
| CN919196 | CN862786 | DY959979 | DY968221 | CB881654 | CK123751 |
| CN919226 | CN943417 | DY960049 | DY984409 | CB881654 | CK123794 |
| CN919337 | CN937949 | DY960107 | DY964667 | CB881654 | CK123827 |
| CN919337 | EB126476 | DY960154 | DY973554 | CB881683 | BQ657500 |
| CN919376 | EB119560 | DY960224 | DY975568 | CB881897 | BQ464940 |
| CN919376 | EB124113 | DY960252 | DY965779 | CB881897 | BQ663337 |
| CN919376 | EB131765 | DY960252 | DY974419 | CB881897 | BQ663674 |
| CN919376 | EB133622 | DY960269 | BQ865214 | CB881897 | CA005391 |
| CN919376 | EB134458 | DY960269 | BQ866374 | CB881947 | CB878844 |
| CN919376 | EB135387 | DY960269 | BQ869740 | CB882000 | AL506462 |
| CN919376 | EB136501 | DY960289 | DY960730 | CB882000 | AL506889 |
| CN919376 | EB136941 | DY960299 | DW137158 | CB882000 | AL507170 |
| CN919422 | CN857056 | DY960349 | DY961824 | CB882000 | AL508095 |
| CN919463 | EB117554 | DY960352 | DY960580 | CB882000 | AL508311 |
| CN919463 | EB124113 | DY960412 | DW123726 | CB882000 | AL508860 |
| CN919463 | EB126620 | DY960412 | DW135783 | CB882000 | AL509520 |
| CN919463 | EB127561 | DY960412 | DY962743 | CB882000 | AL510751 |
| CN919463 | EB136564 | DY960412 | DY968342 | CB882000 | BQ458909 |
| CN919463 | EB137919 | DY960452 | DY974292 | CB882000 | BQ460815 |
| CN919463 | EB144931 | DY960487 | DY967142 | CB882000 | BQ462536 |
| CN919463 | EB157154 | DY960487 | DY970044 | CB882000 | BQ463274 |
| CN919485 | CN852036 | DY960490 | DY969801 | CB882000 | BQ463382 |
| CN919504 | CN866718 | DY960508 | BQ857082 | CB882000 | BQ468525 |
| CN919504 | CN934532 | DY960562 | DY963429 | CB882000 | BQ469027 |
| CN919504 | EB147292 | DY960585 | DY963273 | CB882000 | BQ469058 |
| CN919512 | EB128432 | DY960585 | DY964961 | CB882000 | BQ469503 |
| CN919550 | CN857056 | DY960588 | DY975259 | CB882000 | BQ470050 |
| CN919558 | EB130760 | DY960637 | DW124315 | CB882000 | BQ470211 |
| CN919558 | EB133030 | DY960637 | DY967092 | CB882000 | BQ470432 |
| CN919558 | EB135869 | DY960650 | DW130735 | CB882000 | BQ471292 |
| CN919558 | EB136149 | DY960706 | DY961763 | CB882000 | BQ471439 |
| CN919558 | EB136414 | DY960708 | DY963928 | CB882000 | BQ471546 |
| CN919558 | EB136501 | DY960712 | DW137573 | CB882000 | BQ664227 |
| CN919558 | EB141905 | DY960712 | DW138405 | CB882000 | BQ664899 |
| CN919558 | EB144931 | DY960719 | DY968387 | CB882000 | BQ665074 |
| CN919558 | EB157154 | DY960737 | BQ858549 | CB882000 | BU976902 |
| CN919634 | CN919602 | DY960783 | DW134334 | CB882000 | BU976903 |
| CN919647 | EB147413 | DY960785 | DY963385 | CB882000 | BU976924 |
| CN919648 | CN901607 | DY960860 | BQ859349 | CB882000 | BU977022 |
| CN919650 | EB117554 | DY960893 | DY965490 | CB882000 | BU978089 |
| CN919650 | EB124113 | DY960895 | DY975892 | CB882000 | BU978090 |
| CN919650 | EB126620 | DY960896 | DY975477 | CB882000 | BU978786 |
| CN919650 | EB127561 | DY960896 | DY975718 | CB882000 | BU981374 |
| CN919650 | EB136564 | DY960918 | DY969648 | CB882000 | BU981730 |

|          |          |          |          |          |          |
|----------|----------|----------|----------|----------|----------|
| CN919650 | EB137919 | DY960983 | DY969378 | CB882000 | BU982107 |
| CN919650 | EB144931 | DY961038 | DY973021 | CB882000 | BU983662 |
| CN919650 | EB157154 | DY961058 | DY967881 | CB882000 | BU994468 |
| CN919661 | EB130760 | DY961065 | DW130234 | CB882000 | BU995347 |
| CN919661 | EB133030 | DY961081 | DY967238 | CB882000 | BU996578 |
| CN919661 | EB135869 | DY961106 | DY966558 | CB882000 | BU996757 |
| CN919661 | EB136149 | DY961122 | DY966753 | CB882000 | BU996777 |
| CN919661 | EB136414 | DY961204 | BQ852560 | CB882000 | BU996969 |
| CN919661 | EB136501 | DY961232 | DY965216 | CB882000 | BU997868 |
| CN919661 | EB141905 | DY961232 | DY966979 | CB882000 | BU998279 |
| CN919661 | EB144931 | DY961248 | BQ858549 | CB882000 | BU998989 |
| CN919661 | EB157154 | DY961313 | DW135860 | CB882000 | BU999684 |
| CN919693 | CN866718 | DY961401 | DY975641 | CB882000 | CA001725 |
| CN919693 | CN934532 | DY961432 | DW129067 | CB882000 | CA017904 |
| CN919695 | CN857056 | DY961432 | DW129274 | CB882000 | CA018734 |
| CN919715 | CN880651 | DY961432 | DY961136 | CB882000 | CA020258 |
| CN921185 | CN859474 | DY961443 | DW125707 | CB882000 | CA020462 |
| CN921692 | CN859474 | DY961443 | DW141283 | CB882000 | CA020735 |
| CN921692 | CN859761 | DY961443 | DW141373 | CB882000 | CA020767 |
| CN922297 | CN867423 | DY961457 | DY973561 | CB882000 | CA020850 |
| CN922450 | CN867423 | DY961506 | DW136619 | CB882000 | CA020949 |
| CN922929 | CN923913 | DY961506 | DY962304 | CB882000 | CA021100 |
| CN923237 | CN921169 | DY961506 | DY966775 | CB882000 | CA021367 |
| CN923237 | CN922078 | DY961555 | DW133899 | CB882000 | CA021655 |
| CN923611 | CN923913 | DY961579 | DW129274 | CB882000 | CA021781 |
| CN923632 | CN921169 | DY961628 | DW138728 | CB882000 | CA021879 |
| CN923632 | CN922078 | DY961628 | DW138900 | CB882000 | CA022143 |
| CN923894 | CN863560 | DY961628 | DW138953 | CB882000 | CA022153 |
| CN924579 | CN859474 | DY961628 | DY972570 | CB882000 | CA022164 |
| CN924983 | CN859474 | DY961679 | DW140014 | CB882000 | CA022402 |
| CN929352 | EB107534 | DY961700 | BQ863818 | CB882000 | CA022753 |
| CN929401 | CN864594 | DY961749 | DW136710 | CB882000 | CA022770 |
| CN929438 | CN873929 | DY961749 | DY960888 | CB882000 | CA023509 |
| CN929438 | CN907280 | DY961772 | DY967238 | CB882000 | CA023653 |
| CN929438 | CN907355 | DY961775 | DY975958 | CB882000 | CA023820 |
| CN929438 | CN948123 | DY961809 | DY962646 | CB882000 | CA023901 |
| CN929438 | EB148133 | DY961889 | BQ859067 | CB882000 | CA024063 |
| CN929438 | EB148180 | DY961933 | DW138751 | CB882000 | CA024521 |
| CN929880 | CN907246 | DY961933 | DY962535 | CB882000 | CA024620 |
| CN929880 | CN907280 | DY961933 | DY966824 | CB882000 | CA024665 |
| CN929880 | CN930734 | DY961990 | DY968541 | CB882000 | CA025073 |
| CN929880 | CN948142 | DY962070 | DY960580 | CB882000 | CA025102 |
| CN929880 | EB147518 | DY962077 | DY965264 | CB882000 | CA025162 |
| CN929880 | EB148665 | DY962095 | DY969042 | CB882000 | CA025736 |
| CN930003 | CN873929 | DY962167 | DW140050 | CB882000 | CA025780 |
| CN930003 | CN881681 | DY962248 | BQ850032 | CB882000 | CA025806 |
| CN930003 | CN907246 | DY962248 | DY963603 | CB882000 | CA025886 |
| CN930003 | CN919240 | DY962254 | DY959433 | CB882000 | CA026151 |
| CN930003 | CN934605 | DY962260 | BQ856460 | CB882000 | CA026321 |
| CN930003 | CN941534 | DY962333 | DY961706 | CB882000 | CA026436 |
| CN930003 | CN941566 | DY962333 | DY963031 | CB882000 | CA026467 |
| CN930003 | CN943728 | DY962333 | DY974719 | CB882000 | CA027104 |

|          |          |          |          |          |          |
|----------|----------|----------|----------|----------|----------|
| CN930003 | CN946809 | DY962333 | DY977317 | CB882000 | CA027176 |
| CN930003 | CN947320 | DY962348 | DY961854 | CB882000 | CA027304 |
| CN930003 | CN948638 | DY962374 | DW128494 | CB882000 | CA027394 |
| CN930003 | EB148133 | DY962380 | DY968484 | CB882000 | CA027803 |
| CN930003 | EB148478 | DY962478 | DY960580 | CB882000 | CA028219 |
| CN930003 | EB148493 | DY962487 | DW138211 | CB882000 | CA028461 |
| CN930087 | CN856539 | DY962509 | BQ872913 | CB882000 | CA028500 |
| CN930291 | CN902460 | DY962509 | DY968506 | CB882000 | CA028583 |
| CN930470 | CN873929 | DY962527 | DW138050 | CB882000 | CA028748 |
| CN930470 | CN907126 | DY962581 | DY964013 | CB882000 | CA028834 |
| CN930470 | CN907246 | DY962589 | DW127699 | CB882000 | CA029091 |
| CN930470 | CN907355 | DY962619 | DY968484 | CB882000 | CA029236 |
| CN930470 | CN919240 | DY962677 | DY964442 | CB882000 | CA029278 |
| CN930470 | CN934605 | DY962677 | DY970272 | CB882000 | CA029440 |
| CN930470 | CN939782 | DY962677 | DY973320 | CB882000 | CA029527 |
| CN930470 | CN941534 | DY962690 | DY975002 | CB882000 | CA029604 |
| CN930470 | CN942901 | DY962715 | DY964657 | CB882000 | CA029684 |
| CN930470 | CN943538 | DY962715 | DY973519 | CB882000 | CA029979 |
| CN930470 | CN946809 | DY962716 | BQ851784 | CB882000 | CA030740 |
| CN930470 | CN947320 | DY962716 | DY970186 | CB882000 | CA030842 |
| CN930470 | CN948123 | DY962748 | BQ862840 | CB882000 | CA030885 |
| CN930470 | EB148133 | DY962748 | DW135685 | CB882000 | CA031024 |
| CN930470 | EB148180 | DY962748 | DY968330 | CB882000 | CA031043 |
| CN930495 | CN907126 | DY962772 | BQ851796 | CB882000 | CB859602 |
| CN930495 | CN907246 | DY962836 | DY969042 | CB882000 | CB874391 |
| CN930495 | CN919240 | DY962863 | DY968484 | CB882000 | CB874599 |
| CN930495 | CN930734 | DY962885 | DY974808 | CB882000 | CB875334 |
| CN930495 | CN939782 | DY962942 | BQ871448 | CB882000 | CB875601 |
| CN930495 | CN948142 | DY962956 | DY965385 | CB882000 | CB875823 |
| CN930495 | EB147518 | DY962967 | DW137321 | CB882000 | CB881485 |
| CN930495 | EB148493 | DY962993 | DY980154 | CB882000 | CB883055 |
| CN930495 | EB148665 | DY962993 | DY983031 | CB882000 | CB883464 |
| CN930553 | CN873929 | DY963047 | DY970186 | CB882000 | CK122353 |
| CN930553 | CN879960 | DY963158 | DY966967 | CB882000 | CK122928 |
| CN930553 | CN881681 | DY963199 | DW140236 | CB882000 | CK125190 |
| CN930553 | CN919240 | DY963199 | DW140624 | CB882082 | CA002915 |
| CN930553 | CN934605 | DY963218 | DW125684 | CB882093 | BQ466683 |
| CN930553 | CN936965 | DY963253 | DW140050 | CB882221 | AL508104 |
| CN930553 | CN941534 | DY963279 | DY976677 | CB882347 | CB876512 |
| CN930553 | CN941566 | DY963288 | DY968573 | CB882371 | BU996058 |
| CN930553 | CN943728 | DY963309 | DY965451 | CB882591 | BU994640 |
| CN930553 | CN948638 | DY963373 | DY971843 | CB882733 | BQ464934 |
| CN930553 | CN948761 | DY963475 | DY968459 | CB882735 | BQ465534 |
| CN930553 | CN948805 | DY963475 | DY973683 | CB883132 | BQ471908 |
| CN930553 | EB148133 | DY963485 | BQ858934 | CB883190 | CA002709 |
| CN930553 | EB148180 | DY963489 | DY966029 | CB883380 | AL504581 |
| CN930553 | EB148478 | DY963605 | BQ873686 | CB883380 | AL506319 |
| CN930553 | EB148493 | DY963697 | DY972261 | CB883380 | AL507514 |
| CN930584 | CN873929 | DY963723 | DY972565 | CB883380 | AL508663 |
| CN930584 | CN879960 | DY963777 | DY972298 | CB883380 | BQ465209 |
| CN930584 | CN881681 | DY963912 | DY964344 | CB883380 | BQ465211 |
| CN930584 | CN919240 | DY963963 | DW137158 | CB883380 | BQ467502 |

|          |          |          |          |          |          |
|----------|----------|----------|----------|----------|----------|
| CN930584 | CN934605 | DY964051 | DY959757 | CB883380 | BQ467651 |
| CN930584 | CN936965 | DY964109 | BQ856460 | CB883380 | BQ468097 |
| CN930584 | CN941534 | DY964109 | DY960998 | CB883380 | BQ471316 |
| CN930584 | CN941566 | DY964138 | DY962329 | CB883380 | CA017767 |
| CN930584 | CN943728 | DY964138 | DY963623 | CB883380 | CA019752 |
| CN930584 | CN948638 | DY964146 | DW133882 | CB883380 | CA022213 |
| CN930584 | CN948761 | DY964222 | BQ855264 | CB883380 | CA022894 |
| CN930584 | CN948805 | DY964307 | DY964139 | CB883380 | CA025500 |
| CN930584 | EB148133 | DY964356 | DY967591 | CB883380 | CA028788 |
| CN930584 | EB148180 | DY964382 | DY979325 | CB883380 | CB882780 |
| CN930584 | EB148478 | DY964421 | DY964285 | CB883380 | CB883048 |
| CN930584 | EB148493 | DY964421 | DY970401 | CB883380 | CK123121 |
| CN930638 | CN907246 | DY964421 | DY972027 | CB883477 | CA030513 |
| CN930638 | CN907280 | DY964421 | DY974514 | CB883478 | BQ467003 |
| CN930638 | CN930734 | DY964451 | BQ850032 | CB883504 | BU976143 |
| CN930638 | CN948142 | DY964451 | DY963603 | CB883521 | BU997012 |
| CN930638 | CN948761 | DY964455 | DY973241 | CB883658 | AL507781 |
| CN930638 | EB147518 | DY964477 | DY960519 | CB884098 | BQ468524 |
| CN930638 | EB148180 | DY964478 | DW136624 | CB884102 | CA021329 |
| CN930638 | EB148665 | DY964676 | DY975568 | CB884102 | CA023430 |
| CN930755 | CN936220 | DY964767 | BQ867006 | CB884102 | CA026602 |
| CN930839 | CN883221 | DY964773 | DW141130 | CB884145 | CA021329 |
| CN931257 | CN870119 | DY964799 | DW133654 | CB884145 | CA026602 |
| CN931257 | CN870494 | DY964799 | DY975149 | CK122016 | BU979648 |
| CN931257 | CN879921 | DY964802 | BQ873971 | CK122016 | CA032285 |
| CN931257 | CN890504 | DY964802 | DY970581 | CK122016 | CK122177 |
| CN931318 | CN856877 | DY964802 | DY974260 | CK122016 | CK122451 |
| CN931918 | CN873929 | DY964811 | DY963162 | CK122044 | CA008622 |
| CN931918 | CN881681 | DY964920 | DY967668 | CK122076 | AL507313 |
| CN931918 | CN907126 | DY964920 | DY973021 | CK122085 | CB876211 |
| CN931918 | CN907246 | DY964924 | DW140050 | CK122085 | CB876512 |
| CN931918 | CN919240 | DY964995 | BQ851982 | CK122190 | AL502389 |
| CN931918 | CN929756 | DY964995 | DY961717 | CK122191 | CA016150 |
| CN931918 | CN930734 | DY965125 | BQ854427 | CK122239 | CK124662 |
| CN931918 | CN934278 | DY965129 | BQ863791 | CK122245 | CK123004 |
| CN931918 | CN934605 | DY965150 | DY963429 | CK122422 | CA002571 |
| CN931918 | CN939782 | DY965201 | DY960904 | CK122454 | AL450957 |
| CN931918 | CN941534 | DY965201 | DY962953 | CK122477 | BQ464934 |
| CN931918 | CN941566 | DY965201 | DY963393 | CK122519 | AL509815 |
| CN931918 | CN943728 | DY965201 | DY972534 | CK122519 | BQ460131 |
| CN931918 | CN946809 | DY965201 | DY974142 | CK122519 | BQ657747 |
| CN931918 | CN947320 | DY965213 | DY961527 | CK122519 | BU977032 |
| CN931918 | CN948142 | DY965223 | DY974489 | CK122558 | AL501419 |
| CN931918 | CN948638 | DY965230 | DY971895 | CK122558 | BU999349 |
| CN931918 | EB147518 | DY965230 | DY972540 | CK122558 | CA031468 |
| CN931918 | EB148133 | DY965335 | DW136696 | CK122558 | CA031556 |
| CN931918 | EB148478 | DY965373 | DY967848 | CK122558 | CA033007 |
| CN931918 | EB148493 | DY965576 | BQ873445 | CK122558 | CB876133 |
| CN931918 | EB148665 | DY965588 | DW136570 | CK122587 | CA000338 |
| CN931918 | EB149094 | DY965600 | DW136793 | CK122587 | CA002915 |
| CN932139 | CN939633 | DY965606 | DY964300 | CK122593 | BQ465065 |
| CN932410 | CN878903 | DY965621 | DY960580 | CK122608 | BQ458407 |

|          |          |          |          |          |          |
|----------|----------|----------|----------|----------|----------|
| CN932410 | CN879960 | DY965722 | DW136728 | CK122608 | BQ460814 |
| CN932410 | CN906951 | DY965722 | DY969646 | CK122608 | BU979911 |
| CN932410 | CN907126 | DY965722 | DY975321 | CK122608 | BU980036 |
| CN932410 | CN907350 | DY965829 | DW125221 | CK122608 | BU981041 |
| CN932410 | CN907355 | DY965836 | DY984267 | CK122608 | BU997544 |
| CN932410 | CN919240 | DY965866 | BQ858336 | CK122608 | CA015747 |
| CN932410 | CN930709 | DY965907 | DY969214 | CK122608 | CA023485 |
| CN932410 | CN931638 | DY965907 | DY972314 | CK122608 | CA030431 |
| CN932410 | CN936965 | DY965909 | BQ862347 | CK122608 | CA032317 |
| CN932410 | CN940031 | DY965928 | DY978878 | CK122608 | CB877001 |
| CN932410 | CN941534 | DY965977 | DY984267 | CK122611 | CA004907 |
| CN932410 | CN941566 | DY966060 | DW129067 | CK122634 | CA002915 |
| CN932410 | CN943336 | DY966060 | DW129274 | CK122688 | CA002571 |
| CN932410 | CN943728 | DY966060 | DY961136 | CK122688 | CA010817 |
| CN932410 | CN945200 | DY966079 | BQ871626 | CK122740 | BQ466683 |
| CN932410 | CN948142 | DY966086 | DY966967 | CK122802 | AL508104 |
| CN932410 | CN948761 | DY966233 | DW126159 | CK122802 | BQ466683 |
| CN932410 | CN948805 | DY966240 | DY966446 | CK122802 | BQ467003 |
| CN932410 | EB148180 | DY966241 | DY960108 | CK122858 | AL511051 |
| CN932410 | EB148478 | DY966241 | DY963923 | CK122858 | BQ460282 |
| CN932410 | EB149094 | DY966247 | BQ856460 | CK122858 | CA033007 |
| CN932627 | EB146546 | DY966247 | DY960998 | CK122889 | CA010817 |
| CN932721 | CN873929 | DY966265 | DW135687 | CK122990 | CA015452 |
| CN932721 | CN907246 | DY966270 | BQ855748 | CK123003 | BQ467723 |
| CN932721 | CN919240 | DY966273 | DY975532 | CK123302 | CK123004 |
| CN932721 | CN934605 | DY966277 | BQ874624 | CK123346 | CA002571 |
| CN932721 | CN941534 | DY966334 | DW139106 | CK123438 | CA002915 |
| CN932721 | CN946809 | DY966334 | DW139125 | CK123460 | CK123004 |
| CN932721 | CN947320 | DY966334 | DY964821 | CK123477 | BQ464934 |
| CN933679 | CN876937 | DY966334 | DY971129 | CK123564 | AL507313 |
| CN933705 | CN903224 | DY966336 | BQ852904 | CK123742 | CB883595 |
| CN934022 | CN884269 | DY966367 | DW126367 | CK123768 | CA030894 |
| CN934046 | CN864842 | DY966380 | BQ852108 | CK123822 | BQ458407 |
| CN934076 | CN883567 | DY966380 | BQ859420 | CK123822 | BQ460814 |
| CN934077 | CN883567 | DY966380 | BQ862427 | CK123822 | BQ656997 |
| CN934127 | CN948103 | DY966380 | BQ862439 | CK123822 | BQ657242 |
| CN934763 | CN942377 | DY966380 | DW129526 | CK123822 | BQ658205 |
| CN934763 | CN942508 | DY966380 | DW138844 | CK123822 | BU976089 |
| CN934763 | CN942559 | DY966380 | DY968124 | CK123822 | BU979911 |
| CN934823 | CN891226 | DY966380 | DY975820 | CK123822 | BU980036 |
| CN934823 | CN906061 | DY966393 | DY975568 | CK123822 | BU981041 |
| CN934823 | CN906648 | DY966399 | DW135416 | CK123822 | BU997544 |
| CN934823 | CN940780 | DY966415 | DY976238 | CK123822 | BU999456 |
| CN934912 | CN937466 | DY966424 | DY973254 | CK123822 | CA015747 |
| CN934967 | CN903224 | DY966424 | DY974851 | CK123822 | CA020746 |
| CN934967 | CN948774 | DY966572 | DY966902 | CK123822 | CA023485 |
| CN934985 | CN907246 | DY966597 | BQ856118 | CK123822 | CA030431 |
| CN934985 | CN907280 | DY966763 | DW133882 | CK123822 | CA030974 |
| CN934985 | CN930734 | DY966791 | DY961900 | CK123822 | CA032317 |
| CN934985 | CN948142 | DY966815 | DY979875 | CK123822 | CB858571 |
| CN934985 | CN948761 | DY966855 | DY969115 | CK123822 | CB858781 |
| CN934985 | EB147518 | DY966992 | DY959928 | CK123822 | CB858866 |

|          |          |          |          |          |          |
|----------|----------|----------|----------|----------|----------|
| CN934985 | EB148180 | DY967015 | DY966902 | CK123822 | CB875558 |
| CN934985 | EB148665 | DY967036 | BQ852786 | CK123822 | CB876285 |
| CN935024 | EB146734 | DY967052 | DY971260 | CK123822 | CB877001 |
| CN935287 | CN944483 | DY967053 | DY968428 | CK123825 | CB876133 |
| CN935407 | CN856740 | DY967060 | DY969378 | CK123830 | BQ467003 |
| CN935471 | EB119560 | DY967104 | DW135549 | CK123844 | BQ463441 |
| CN935471 | EB124113 | DY967104 | DW137369 | CK123844 | BU981267 |
| CN935471 | EB131765 | DY967104 | DW140260 | CK123858 | BQ467723 |
| CN935471 | EB133622 | DY967156 | DW137568 | CK123880 | AL507313 |
| CN935471 | EB134458 | DY967217 | DY972972 | CK123891 | CA002571 |
| CN935471 | EB135387 | DY967293 | DW137413 | CK123906 | AL503998 |
| CN935471 | EB136501 | DY967317 | DY962354 | CK123906 | AL508857 |
| CN935471 | EB136941 | DY967366 | DY972565 | CK123906 | BU997007 |
| CN935479 | CN938724 | DY967371 | DY973081 | CK124006 | BQ466583 |
| CN935516 | EB146734 | DY967397 | DY959928 | CK124031 | BQ464934 |
| CN935704 | CN867183 | DY967462 | DY960580 | CK124107 | AL507313 |
| CN935704 | CN867288 | DY967474 | BQ856460 | CK124124 | BU982705 |
| CN936001 | CN873306 | DY967496 | DY961805 | CK124124 | CK123913 |
| CN936067 | CN876937 | DY967496 | DY968936 | CK124178 | BQ466583 |
| CN936581 | CN934873 | DY967496 | DY975497 | CK124199 | AL507313 |
| CN936581 | CN935763 | DY967500 | DW138728 | CK124252 | CB883595 |
| CN936581 | CN936018 | DY967500 | DW138900 | CK124277 | BQ463419 |
| CN936700 | CN922201 | DY967521 | DW133324 | CK124454 | CB876211 |
| CN936806 | CN873929 | DY967521 | DW135123 | CK124454 | CB876512 |
| CN936806 | CN907246 | DY967521 | DY963380 | CK124497 | BQ464934 |
| CN936806 | CN938978 | DY967533 | BQ873225 | CK124562 | AL511051 |
| CN936824 | CN881681 | DY967604 | BQ858542 | CK124562 | CB876512 |
| CN936824 | CN948761 | DY967637 | DY970101 | CK124615 | BU994800 |
| CN936824 | EB148133 | DY967685 | DY971161 | CK124615 | BU995639 |
| CN936824 | EB148180 | DY967698 | DW125920 | CK124742 | BQ467723 |
| CN936983 | CN903443 | DY967698 | DY977655 | CK124778 | AL501419 |
| CN936999 | CN873929 | DY967798 | DW132546 | CK124778 | AL507779 |
| CN936999 | CN879960 | DY967817 | DY962413 | CK124778 | BQ460282 |
| CN936999 | CN907126 | DY967833 | DY974793 | CK124778 | BU983898 |
| CN936999 | CN907246 | DY967847 | DY973081 | CK124778 | BU999349 |
| CN936999 | CN907355 | DY967857 | DY968573 | CK124778 | CA022372 |
| CN936999 | CN919240 | DY967857 | DY972519 | CK124778 | CA031468 |
| CN936999 | CN931638 | DY967859 | DY976275 | CK124778 | CA031556 |
| CN936999 | CN934605 | DY967898 | DY968140 | CK124778 | CA033007 |
| CN936999 | CN936965 | DY967898 | DY977513 | CK124778 | CB876133 |
| CN936999 | CN939782 | DY967909 | DY962964 | CK124778 | CB876318 |
| CN936999 | CN941534 | DY967923 | BQ863009 | CK124883 | BQ465035 |
| CN936999 | CN941566 | DY967923 | DY982470 | CK124883 | BQ465242 |
| CN936999 | CN942901 | DY967956 | DY965779 | CK124883 | CA008205 |
| CN936999 | CN943538 | DY967984 | DY962502 | CK124988 | AL511051 |
| CN936999 | CN946809 | DY967984 | DY966897 | CK125017 | BQ466683 |
| CN936999 | CN947320 | DY968008 | DW129399 | CK125034 | CA023897 |
| CN936999 | CN948123 | DY968008 | DY973955 | CK125071 | CA002571 |
| CN936999 | CN948761 | DY968017 | DW132546 | CK125074 | BQ458407 |
| CN936999 | CN948805 | DY968089 | DW123959 | CK125074 | BQ459627 |
| CN936999 | EB148133 | DY968100 | BQ859306 | CK125074 | BU980036 |
| CN936999 | EB148180 | DY968100 | DW140658 | CK125074 | BU981041 |



|          |          |          |          |                |          |
|----------|----------|----------|----------|----------------|----------|
| CN936999 | EB148478 | DY968114 | DW128003 | CK125074       | BU997210 |
| CN936999 | EB149094 | DY968147 | DY971354 | CK125074       | CA020746 |
| CN937039 | CN873306 | DY968179 | BQ843459 | CK125074       | CA023485 |
| CN937039 | CN878903 | DY968204 | DY970603 | CK125074       | CA023581 |
| CN937039 | CN906951 | DY968210 | DY973359 | CK125074       | CA033016 |
| CN937039 | CN907126 | DY968257 | BQ862593 | CK125081       | AL511051 |
| CN937039 | CN907246 | DY968300 | DW137413 | CK125081       | CB876133 |
| CN937039 | CN907350 | DY968395 | DY960580 | CK125171       | BQ464934 |
| CN937039 | CN907355 | DY968398 | DW141373 | CK125189       | BU981900 |
| CN937039 | CN919240 | DY968404 | DY967906 | CK125189       | CA032285 |
| CN937039 | CN930709 | DY968511 | BQ850025 | CK125189       | CK122177 |
| CN937039 | CN930734 | DY968547 | DY960444 | CK125189       | CK124221 |
| CN937039 | CN931638 | DY968602 | DW138158 | CK125240       | CA002571 |
| CN937039 | CN939782 | DY968650 | DW135970 | CK125254       | CA011879 |
| CN937039 | CN943336 | DY968665 | DW135416 | CK125285       | AL501419 |
| CN937039 | CN943728 | DY968686 | BQ868257 | CK125322       | BQ465065 |
| CN937039 | CN945200 | DY968686 | DY969710 | CK125355       | CA000182 |
| CN937039 | CN948142 | DY968692 | DY967140 | CK125356       | AL507313 |
| CN937039 | CN948761 | DY968753 | DY975655 | CK125364       | CA002571 |
| CN937039 | EB147518 | DY968807 | DY963099 | CK125415       | BQ665242 |
| CN937039 | EB148493 | DY968886 | DW137035 | CK125415       | BU977085 |
| CN937039 | EB148665 | DY968893 | BQ858336 | CK125415       | CA027454 |
| CN937274 | CN856740 | DY968920 | DY980591 | CK125415       | CA029909 |
| CN937527 | EB147413 | DY968966 | DY971600 | CK125415       | CA030985 |
| CN937647 | EB150864 | DY969008 | DY974808 | CK125415       | CA031174 |
| CN937679 | CN945359 | DY969010 | BQ863408 | CK125415       | CA031236 |
| CN937704 | CN948094 | DY969070 | DY972843 | CK125415       | CA031627 |
| CN937810 | CN906951 | DY969082 | DY974211 | CK125415       | CB874544 |
| CN937810 | CN907246 | DY969082 | DY985036 | CK125415       | CB875569 |
| CN937810 | CN907280 | DY969172 | DW138157 | CK125415       | CK124114 |
| CN937810 | CN907355 | DY969226 | DY966967 | CK125474       | BQ467723 |
| CN937810 | CN930734 | DY969296 | DW135657 | CK125524       | CK122408 |
| CN937810 | CN945200 | DY969296 | DY983697 | CK125794       | AL507313 |
| CN937810 | CN948142 | DY969319 | DW136044 | CK125891       | BQ460282 |
| CN937810 | CN948761 | DY969320 | DY961573 | CK125891       | CA022372 |
| CN937810 | EB147518 | DY969347 | DY976236 | CK125891       | CB876318 |
| CN937810 | EB148665 | DY969363 | BQ851796 | CK125923       | CA009073 |
| CN937850 | EB148425 | DY969497 | DW140310 | CK125923       | CA009741 |
| CN937946 | CN857056 | DY969538 | DY963385 | <i>Hordeum</i> | haruna   |
| CN937999 | CN893611 | DY969553 | DY975879 | EST1           | EST2     |
| CN938094 | CN873929 | DY969619 | DW130930 | AU089829       | AV930401 |
| CN938094 | CN879960 | DY969624 | BQ873225 | AU089835       | AV927019 |
| CN938094 | CN881681 | DY969625 | DY976349 | AU089835       | AV930401 |
| CN938094 | CN919240 | DY969633 | DY976236 | AU089858       | AV927019 |
| CN938094 | CN934605 | DY969688 | BQ857082 | AU089858       | AV930401 |
| CN938094 | CN936965 | DY969733 | DY984267 | AU090004       | AV930401 |
| CN938094 | CN941534 | DY969749 | DY964610 | AU090047       | AV927019 |
| CN938094 | CN941566 | DY969776 | DY968289 | AU090047       | AV930401 |
| CN938094 | CN943728 | DY969787 | DW134150 | AU090063       | AV927019 |
| CN938094 | CN948638 | DY969787 | DY967843 | AU090063       | AV930401 |
| CN938094 | CN948761 | DY969814 | BQ846407 | AU090081       | AV930401 |
| CN938094 | CN948805 | DY969909 | DW140658 | AU090204       | AV925248 |

|          |          |          |          |          |          |
|----------|----------|----------|----------|----------|----------|
| CN938094 | EB148133 | DY969989 | BQ856460 | AU090204 | AV927019 |
| CN938094 | EB148180 | DY970024 | DW128003 | AU090204 | AV930401 |
| CN938094 | EB148478 | DY970081 | DY975435 | AU090219 | AV930401 |
| CN938094 | EB148493 | DY970106 | DY960914 | AU090220 | AV925248 |
| CN938172 | CN941543 | DY970146 | DY960335 | AU090220 | AV927019 |
| CN938185 | CN940596 | DY970150 | BQ856382 | AU090220 | AV930401 |
| CN938185 | EB117554 | DY970219 | DY968387 | AV833815 | BY854850 |
| CN938185 | EB124113 | DY970293 | BQ859306 | AV834511 | BY877732 |
| CN938185 | EB126620 | DY970293 | DW140658 | AV836901 | BJ467699 |
| CN938185 | EB127561 | DY970303 | DY975532 | AV912765 | AV928483 |
| CN938185 | EB135819 | DY970315 | DY975800 | AV913063 | AV935025 |
| CN938185 | EB136564 | DY970386 | DY964158 | AV913068 | AV913498 |
| CN938185 | EB136732 | DY970414 | DY961136 | AV913100 | BJ469617 |
| CN938185 | EB137844 | DY970446 | DW128003 | AV913192 | AV926577 |
| CN938185 | EB137919 | DY970462 | DY976047 | AV913235 | AV914445 |
| CN938185 | EB143372 | DY970471 | DY981862 | AV913265 | BJ549687 |
| CN938185 | EB144917 | DY970526 | DY971333 | AV913265 | BY861278 |
| CN938185 | EB144931 | DY970532 | DW139370 | AV913305 | BJ468825 |
| CN938185 | EB146300 | DY970594 | DW123944 | AV913314 | AV918435 |
| CN938185 | EB157154 | DY970621 | BQ869828 | AV913461 | AV912888 |
| CN938286 | CN878065 | DY970672 | BQ857423 | AV913471 | AV912888 |
| CN938368 | CN944483 | DY970675 | DY964714 | AV913656 | AV934445 |
| CN938518 | CN885036 | DY970705 | DW127638 | AV913661 | BJ470148 |
| CN938531 | CN873929 | DY970705 | DW139525 | AV913739 | BY846520 |
| CN938531 | CN881681 | DY970720 | DY975958 | AV913761 | BJ476882 |
| CN938531 | CN907246 | DY970752 | DY969414 | AV913811 | AV912888 |
| CN938531 | CN919240 | DY970810 | DY973286 | AV913848 | AV917501 |
| CN938531 | CN941534 | DY970822 | DY970292 | AV913944 | BJ471559 |
| CN938531 | CN941566 | DY970866 | DY972893 | AV913944 | BJ471899 |
| CN938531 | CN943728 | DY970868 | DW138945 | AV914274 | AV913145 |
| CN938531 | CN946809 | DY970868 | DW139155 | AV914274 | AV918435 |
| CN938531 | CN947320 | DY970868 | DY962008 | AV914337 | AV932188 |
| CN938531 | CN948638 | DY970868 | DY967739 | AV914337 | BJ469701 |
| CN938531 | EB148133 | DY970868 | DY973929 | AV914369 | AV931131 |
| CN938531 | EB148493 | DY970868 | DY973983 | AV914384 | AV913145 |
| CN938534 | EB148450 | DY970921 | DY970717 | AV914384 | AV918435 |
| CN938546 | EB123009 | DY970949 | DY980043 | AV914455 | AV912888 |
| CN938608 | EB148425 | DY970959 | DW135147 | AV914559 | AV918435 |
| CN938638 | CN876937 | DY970980 | DY965450 | AV914712 | AV913046 |
| CN938645 | CN857056 | DY970980 | DY982731 | AV914850 | AV928483 |
| CN938683 | CN857056 | DY970991 | DY975994 | AV915054 | AV912888 |
| CN938897 | EB148441 | DY971048 | DY961824 | AV915130 | BJ465962 |
| CN938932 | EB150864 | DY971083 | DY964792 | AV915130 | BJ467104 |
| CN938946 | EB148425 | DY971113 | BQ849948 | AV915133 | AV917976 |
| CN939074 | CN850727 | DY971168 | DW135687 | AV915209 | AV923305 |
| CN939074 | CN850925 | DY971229 | DY961385 | AV915471 | AV916453 |
| CN939094 | EB150078 | DY971262 | BQ856405 | AV915508 | AV932263 |
| CN939140 | CN934873 | DY971262 | DW132734 | AV915508 | AV934216 |
| CN939140 | CN936018 | DY971302 | BQ872692 | AV915582 | BJ549125 |
| CN939164 | CN878351 | DY971352 | BQ854427 | AV915612 | AV912888 |
| CN939265 | CN931801 | DY971400 | DW138917 | AV915661 | AV916118 |
| CN939481 | CN862892 | DY971400 | DW138997 | AV915799 | AV913145 |

|          |          |          |          |          |          |
|----------|----------|----------|----------|----------|----------|
| CN939481 | CN887600 | DY971400 | DW141332 | AV915915 | BY839136 |
| CN939481 | CN949184 | DY971400 | DY961480 | AV915938 | AV927343 |
| CN939551 | CN903841 | DY971400 | DY965546 | AV916035 | AV921153 |
| CN939578 | CN891715 | DY971400 | DY972821 | AV916042 | AV919492 |
| CN939690 | CN940463 | DY971400 | DY975519 | AV916056 | AV913145 |
| CN939802 | CN873929 | DY971413 | DY970292 | AV916056 | AV918435 |
| CN939802 | CN907246 | DY971422 | BQ849479 | AV916173 | AV912888 |
| CN939802 | CN919240 | DY971445 | DY978754 | AV916556 | BY849144 |
| CN939802 | CN934605 | DY971460 | DY963803 | AV916608 | AV923305 |
| CN939802 | CN941534 | DY971460 | DY974013 | AV916794 | AV925340 |
| CN939802 | CN946809 | DY971461 | DW134334 | AV916815 | BY846520 |
| CN939802 | CN947320 | DY971463 | DY975035 | AV916914 | AV932263 |
| CN939838 | CN936220 | DY971471 | DY967714 | AV916914 | AV934216 |
| CN939874 | CN907153 | DY971483 | DY966327 | AV916914 | AV936473 |
| CN939874 | CN919342 | DY971545 | DY972565 | AV916989 | AV919492 |
| CN939874 | EB147817 | DY971559 | DW135325 | AV916997 | AV923305 |
| CN939962 | EB133408 | DY971571 | DY967113 | AV917157 | AV925347 |
| CN939962 | EB134282 | DY971587 | DY960806 | AV917173 | BJ472405 |
| CN939962 | EB141239 | DY971597 | DW138050 | AV917185 | AV924890 |
| CN940058 | EB125465 | DY971623 | BQ859070 | AV917499 | AV928483 |
| CN940058 | EB125588 | DY971627 | DW129837 | AV917592 | AV915463 |
| CN940102 | CN942377 | DY971660 | DY966167 | AV917597 | AV934919 |
| CN940102 | CN942508 | DY971703 | DY961385 | AV917597 | BJ476872 |
| CN940309 | CN857056 | DY971816 | DY961191 | AV917823 | AV913145 |
| CN940495 | CN940133 | DY971834 | BQ851827 | AV917852 | AV913145 |
| CN940579 | CN876937 | DY971870 | DY971129 | AV917902 | AV921832 |
| CN940635 | CN947207 | DY971881 | DW138211 | AV917902 | BJ463020 |
| CN940739 | CN851019 | DY971983 | DW139206 | AV918158 | AV934216 |
| CN940739 | CN865318 | DY972009 | BQ859349 | AV918158 | AV936473 |
| CN940739 | CN865319 | DY972033 | DW140041 | AV918242 | AV919492 |
| CN940739 | CN879831 | DY972036 | DY964141 | AV918318 | AV930182 |
| CN940739 | CN883258 | DY972117 | BQ860607 | AV918417 | BY861274 |
| CN940739 | CN884630 | DY972148 | BQ855748 | AV918422 | BJ462528 |
| CN940739 | CN893331 | DY972239 | DY960243 | AV918473 | BJ462528 |
| CN940739 | CN904277 | DY972259 | DW137073 | AV918559 | BY861278 |
| CN940739 | CN905212 | DY972259 | DY967708 | AV918708 | AV918435 |
| CN940739 | CN906037 | DY972317 | DY963409 | AV918854 | BJ473416 |
| CN940739 | CN919463 | DY972367 | DY959264 | AV918958 | AV915441 |
| CN940739 | CN919661 | DY972375 | DY970186 | AV918958 | BJ475068 |
| CN940739 | CN935471 | DY972387 | BQ857082 | AV918958 | BJ476770 |
| CN940739 | CN939443 | DY972405 | DY961207 | AV918960 | BJ476193 |
| CN940743 | CN851617 | DY972405 | DY971192 | AV918965 | AV914212 |
| CN940743 | CN851634 | DY972444 | DY964474 | AV919070 | AV914212 |
| CN940800 | EB149092 | DY972475 | DW128494 | AV919133 | AV913169 |
| CN940806 | CN904291 | DY972503 | DY977655 | AV919133 | AV932445 |
| CN940860 | EB146613 | DY972584 | DY964909 | AV919194 | AV913145 |
| CN940874 | CN891115 | DY972592 | DY964300 | AV919222 | AV915668 |
| CN940874 | CN892663 | DY972594 | DY963162 | AV919222 | AV919492 |
| CN940874 | CN903560 | DY972688 | BQ858549 | AV919368 | BJ462528 |
| CN940874 | EB147523 | DY972691 | DY968231 | AV919415 | AV913145 |
| CN940934 | EB148425 | DY972693 | DY969378 | AV919686 | AV918435 |
| CN940935 | EB150868 | DY972703 | DY965887 | AV919738 | AV927962 |

|          |          |          |          |          |          |
|----------|----------|----------|----------|----------|----------|
| CN941014 | CN855993 | DY972790 | DY962974 | AV919807 | BJ462894 |
| CN941014 | CN856223 | DY972790 | DY968043 | AV919824 | AV918435 |
| CN941014 | CN857349 | DY972790 | DY971925 | AV920208 | BY876967 |
| CN941051 | CN930302 | DY972790 | DY972761 | AV920262 | BJ462410 |
| CN941051 | EB109019 | DY972822 | DY984075 | AV920262 | BJ464788 |
| CN941051 | EB109157 | DY972867 | DW133573 | AV920345 | AV923892 |
| CN941051 | EB110271 | DY972890 | DY964988 | AV920362 | BJ462528 |
| CN941051 | EB110284 | DY972906 | DW138059 | AV920442 | AV917311 |
| CN941051 | EB118027 | DY972923 | DY976996 | AV920607 | AV934216 |
| CN941051 | EB123152 | DY972933 | DY961763 | AV920607 | AV935105 |
| CN941051 | EB125052 | DY972967 | DY973163 | AV920607 | BJ470741 |
| CN941051 | EB134661 | DY973024 | DW133229 | AV920607 | BJ475566 |
| CN941051 | EB138011 | DY973042 | DW139655 | AV920872 | AV919843 |
| CN941195 | CN937151 | DY973042 | DY963928 | AV920872 | BJ466997 |
| CN941260 | CN947549 | DY973120 | DY959264 | AV920872 | BJ473382 |
| CN941263 | CN863351 | DY973170 | BQ855264 | AV920872 | BJ473632 |
| CN941263 | CN868768 | DY973187 | DY973628 | AV921054 | AV927343 |
| CN941263 | CN882873 | DY973324 | DY962751 | AV921301 | BJ473315 |
| CN941263 | CN887102 | DY973364 | DW134098 | AV921363 | AV913145 |
| CN941293 | CN869241 | DY973425 | DW137182 | AV921757 | AV920310 |
| CN941293 | CN879921 | DY973470 | DW136710 | AV921891 | AV923305 |
| CN941293 | CN883940 | DY973470 | DY960888 | AV922359 | AV913145 |
| CN941293 | CN890972 | DY973472 | BQ858336 | AV922458 | AV919175 |
| CN941293 | CN940836 | DY973541 | DW133689 | AV922547 | AV918435 |
| CN941293 | CN947184 | DY973573 | BQ865944 | AV922552 | AV915542 |
| CN941331 | CN873929 | DY973573 | BQ868040 | AV922589 | BY871745 |
| CN941331 | CN938978 | DY973573 | BQ870283 | AV922695 | BJ472260 |
| CN941348 | CN867478 | DY973590 | DY973163 | AV922776 | AV925248 |
| CN941499 | CN892986 | DY973664 | DW144342 | AV922776 | AV927019 |
| CN941499 | CN936773 | DY973682 | DY972205 | AV922776 | AV930401 |
| CN941665 | CN943543 | DY973735 | DY959354 | AV922907 | AV929075 |
| CN941683 | CN878903 | DY973785 | DY969378 | AV922907 | AV930981 |
| CN941683 | CN906951 | DY973812 | DY968483 | AV923040 | AV912998 |
| CN941683 | CN907126 | DY973822 | DY969951 | AV923040 | AV913013 |
| CN941683 | CN907246 | DY973866 | DW140414 | AV923040 | AV913024 |
| CN941683 | CN907350 | DY973866 | DY960891 | AV923040 | AV913122 |
| CN941683 | CN907355 | DY973866 | DY964139 | AV923040 | AV914797 |
| CN941683 | CN919240 | DY973866 | DY966292 | AV923040 | AV915120 |
| CN941683 | CN930709 | DY973957 | DY966967 | AV923040 | AV915238 |
| CN941683 | CN930734 | DY974074 | DY962751 | AV923040 | AV915458 |
| CN941683 | CN939782 | DY974162 | DW130722 | AV923040 | AV916194 |
| CN941683 | CN943336 | DY974229 | DY963698 | AV923040 | AV916279 |
| CN941683 | CN943728 | DY974261 | DY963733 | AV923040 | AV916510 |
| CN941683 | CN945200 | DY974299 | DW125114 | AV923040 | AV917104 |
| CN941683 | CN948142 | DY974326 | DY972699 | AV923040 | AV917120 |
| CN941683 | CN948761 | DY974333 | DW128576 | AV923040 | AV917315 |
| CN941683 | EB147518 | DY974333 | DW128621 | AV923040 | AV922770 |
| CN941683 | EB148493 | DY974365 | BQ859349 | AV923040 | AV922848 |
| CN941683 | EB148665 | DY974392 | DW144656 | AV923040 | AV922858 |
| CN941684 | CN948331 | DY974398 | BQ869479 | AV923040 | AV922901 |
| CN941692 | CN848710 | DY974426 | BQ853113 | AV923040 | AV923059 |
| CN941692 | CN941197 | DY974426 | DY963640 | AV923040 | AV923085 |

|          |          |          |          |          |          |
|----------|----------|----------|----------|----------|----------|
| CN941746 | CN948152 | DY974473 | DY959928 | AV923040 | AV923104 |
| CN941811 | CN890239 | DY974552 | DY968219 | AV923040 | AV923106 |
| CN941812 | CN942633 | DY974584 | DW139990 | AV923040 | AV923117 |
| CN941812 | EB132270 | DY974585 | DW129274 | AV923040 | AV923129 |
| CN941812 | EB157375 | DY974585 | DY961136 | AV923040 | AV923138 |
| CN941881 | CN880926 | DY974637 | BQ860829 | AV923040 | AV923159 |
| CN942016 | EB128258 | DY974735 | BQ852651 | AV923040 | AV923169 |
| CN942088 | CN941197 | DY974735 | DW131026 | AV923040 | AV923210 |
| CN942299 | CN942377 | DY974738 | DY969951 | AV923040 | AV923234 |
| CN942299 | CN942508 | DY974774 | DW138050 | AV923040 | AV923249 |
| CN942443 | CN856091 | DY974807 | DW136626 | AV923040 | AV923275 |
| CN942443 | CN856105 | DY974831 | DW136710 | AV923040 | AV923299 |
| CN942443 | CN856820 | DY974831 | DY972149 | AV923040 | AV923455 |
| CN942552 | CN937596 | DY974848 | DW130930 | AV923040 | AV923465 |
| CN942578 | CN890897 | DY974848 | DY969744 | AV923040 | AV923472 |
| CN942578 | CN906769 | DY974850 | DW134574 | AV923040 | AV923484 |
| CN942632 | CN890751 | DY974871 | BQ856647 | AV923040 | AV923533 |
| CN942797 | EB147413 | DY974897 | DW139370 | AV923040 | AV923607 |
| CN942822 | EB119193 | DY974908 | DY963180 | AV923040 | AV923647 |
| CN942822 | EB124187 | DY974908 | DY975943 | AV923040 | AV923662 |
| CN942822 | EB125316 | DY974944 | DY982334 | AV923040 | AV923674 |
| CN942822 | EB125781 | DY974959 | DW135631 | AV923040 | AV923685 |
| CN942822 | EB126764 | DY975034 | DW126367 | AV923040 | AV923712 |
| CN942822 | EB126776 | DY975034 | DY971385 | AV923040 | AV923730 |
| CN942822 | EB127118 | DY975073 | DY969648 | AV923040 | AV923777 |
| CN942822 | EB127210 | DY975081 | DY970577 | AV923040 | AV923786 |
| CN942822 | EB127297 | DY975102 | DY967354 | AV923040 | AV923800 |
| CN942822 | EB127681 | DY975106 | DW137413 | AV923040 | AV923823 |
| CN942822 | EB128071 | DY975113 | DY964870 | AV923040 | AV923834 |
| CN942822 | EB128873 | DY975116 | DY960445 | AV923040 | AV923860 |
| CN942822 | EB128942 | DY975186 | DY974753 | AV923040 | AV923912 |
| CN942822 | EB129507 | DY975191 | BQ872692 | AV923040 | AV923956 |
| CN942822 | EB130129 | DY975204 | BQ853251 | AV923040 | AV924003 |
| CN942822 | EB130286 | DY975204 | BQ862840 | AV923040 | AV924006 |
| CN942822 | EB130882 | DY975204 | DW125407 | AV923040 | AV924060 |
| CN942822 | EB130936 | DY975204 | DW135685 | AV923040 | AV924097 |
| CN942822 | EB131509 | DY975204 | DY968330 | AV923040 | AV924124 |
| CN942822 | EB131979 | DY975283 | DY966029 | AV923040 | AV924198 |
| CN942822 | EB132481 | DY975297 | DY973628 | AV923040 | AV924212 |
| CN942822 | EB132561 | DY975313 | DW128314 | AV923040 | AV924213 |
| CN942822 | EB141443 | DY975330 | BQ859306 | AV923040 | AV924256 |
| CN942822 | EB141820 | DY975357 | DY972843 | AV923040 | AV924275 |
| CN942822 | EB141841 | DY975471 | DW130930 | AV923040 | AV924282 |
| CN942833 | CN888329 | DY975471 | DY968435 | AV923040 | AV924380 |
| CN942833 | CN888445 | DY975471 | DY969744 | AV923040 | AV924389 |
| CN942833 | CN893711 | DY975485 | DY972812 | AV923040 | AV924407 |
| CN943019 | CN892986 | DY975492 | DY964407 | AV923040 | AV924477 |
| CN943019 | CN936773 | DY975564 | DW139206 | AV923040 | AV924582 |
| CN943019 | CN938724 | DY975567 | DW140170 | AV923040 | AV924599 |
| CN943176 | CN863351 | DY975604 | BQ859349 | AV923040 | AV924787 |
| CN943176 | CN868768 | DY975604 | DW137082 | AV923040 | AV924825 |
| CN943176 | CN882873 | DY975756 | BQ851784 | AV923040 | AV924837 |

|          |          |          |          |          |          |
|----------|----------|----------|----------|----------|----------|
| CN943176 | CN887102 | DY975756 | DY970186 | AV923040 | AV924880 |
| CN943419 | EB148425 | DY975905 | DW134071 | AV923040 | AV924882 |
| CN943492 | CN905076 | DY975925 | DW141892 | AV923040 | AV925053 |
| CN943492 | CN942377 | DY975973 | DY967238 | AV923040 | AV925186 |
| CN943492 | CN942559 | DY975993 | DY964141 | AV923040 | AV925263 |
| CN943570 | CN887600 | DY976032 | DY963385 | AV923040 | AV925361 |
| CN943570 | CN888329 | DY976035 | BQ860829 | AV923040 | AV925386 |
| CN943570 | CN888445 | DY976043 | BQ859975 | AV923040 | AV925413 |
| CN943570 | CN893711 | DY976043 | DW127775 | AV923040 | AV925484 |
| CN943570 | CN938112 | DY976054 | DY969042 | AV923040 | AV925543 |
| CN943676 | CN939628 | DY976087 | BQ857382 | AV923040 | AV925592 |
| CN943679 | CN904291 | DY976089 | DY984420 | AV923040 | AV925593 |
| CN943679 | CN937943 | DY976106 | DY961662 | AV923040 | AV925601 |
| CN943717 | CN941088 | DY976114 | DW128003 | AV923040 | AV925686 |
| CN943777 | CN894334 | DY976126 | DW138876 | AV923040 | AV925698 |
| CN943814 | CN938390 | DY976126 | DW140095 | AV923040 | AV925699 |
| CN943928 | EB148425 | DY976143 | BQ849948 | AV923040 | AV925776 |
| CN944027 | EB147014 | DY976172 | DY962611 | AV923040 | AV925783 |
| CN944027 | EB147675 | DY976197 | BQ862822 | AV923040 | AV925794 |
| CN944169 | CN878651 | DY976251 | DY959595 | AV923040 | AV925795 |
| CN944206 | CN884591 | DY976285 | DW142310 | AV923040 | AV925843 |
| CN944222 | CN904291 | DY976285 | DW143551 | AV923040 | AV925899 |
| CN944315 | CN890897 | DY976413 | DY974195 | AV923040 | AV925990 |
| CN944327 | CN942130 | DY976506 | DY971556 | AV923040 | AV926078 |
| CN944384 | CN868882 | DY976519 | BQ865422 | AV923040 | AV926099 |
| CN944384 | CN904419 | DY976595 | DW140018 | AV923040 | AV926210 |
| CN944384 | CN904434 | DY976620 | DW128035 | AV923040 | AV926217 |
| CN944384 | CN905603 | DY976622 | DY978909 | AV923040 | AV926310 |
| CN944384 | CN946815 | DY976697 | DW136879 | AV923040 | AV926335 |
| CN944441 | CN941092 | DY976699 | DW136523 | AV923040 | AV926374 |
| CN944441 | CN944141 | DY976707 | DY962868 | AV923040 | AV926383 |
| CN944670 | CN848778 | DY976737 | DW130912 | AV923040 | AV926408 |
| CN944670 | CN850273 | DY976767 | DY973021 | AV923040 | AV926448 |
| CN944670 | CN851594 | DY976779 | BQ849562 | AV923040 | AV926490 |
| CN944670 | CN863949 | DY976802 | DY974034 | AV923040 | AV926533 |
| CN944670 | CN888038 | DY976844 | DY983479 | AV923040 | AV926575 |
| CN944670 | CN890134 | DY976876 | DY965636 | AV923040 | AV926639 |
| CN944670 | CN891218 | DY976901 | BQ856385 | AV923040 | AV926640 |
| CN944670 | CN891430 | DY976905 | DW125073 | AV923040 | AV926686 |
| CN944670 | CN894402 | DY976939 | DW136879 | AV923040 | AV926775 |
| CN944670 | CN901764 | DY976949 | DY983106 | AV923040 | AV926832 |
| CN944670 | CN906559 | DY976958 | BQ856518 | AV923040 | AV926857 |
| CN944670 | CN919462 | DY976971 | DW126543 | AV923040 | AV926869 |
| CN944670 | CN942163 | DY976971 | DW134983 | AV923040 | AV926872 |
| CN944670 | CN949198 | DY977055 | DW125687 | AV923040 | AV926920 |
| CN944697 | CN855388 | DY977055 | DY979735 | AV923040 | AV926943 |
| CN944697 | CN856091 | DY977055 | DY984423 | AV923040 | AV926962 |
| CN944697 | CN856223 | DY977062 | DW135731 | AV923040 | AV926995 |
| CN944697 | CN856253 | DY977095 | DY967845 | AV923040 | AV927078 |
| CN944697 | CN857946 | DY977116 | DW125506 | AV923040 | AV927088 |
| CN944737 | CN903224 | DY977118 | BQ869318 | AV923040 | AV927103 |
| CN944769 | CN882643 | DY977124 | DW123644 | AV923040 | AV927121 |

|          |          |          |          |          |          |
|----------|----------|----------|----------|----------|----------|
| CN945032 | CN863970 | DY977151 | DY968573 | AV923040 | AV927136 |
| CN945093 | CN878354 | DY977151 | DY972519 | AV923040 | AV931988 |
| CN945227 | CN851703 | DY977178 | DW127608 | AV923040 | AV931996 |
| CN945227 | CN851924 | DY977193 | DY981714 | AV923040 | AV932021 |
| CN945227 | CN881825 | DY977209 | DW132147 | AV923040 | AV932034 |
| CN945227 | CN890467 | DY977256 | DY974690 | AV923040 | AV932958 |
| CN945227 | CN891169 | DY977268 | DW138896 | AV923040 | AV934415 |
| CN945227 | CN891741 | DY977268 | DY984221 | AV923040 | BJ462906 |
| CN945227 | CN894210 | DY977282 | DY978779 | AV923040 | BJ462907 |
| CN945227 | CN895005 | DY977289 | BQ849912 | AV923040 | BJ463237 |
| CN945295 | CN850932 | DY977289 | DW141070 | AV923040 | BJ464318 |
| CN945315 | CN893852 | DY977313 | BQ856277 | AV923040 | BJ465118 |
| CN945448 | CN940895 | DY977313 | DW140788 | AV923040 | BJ468750 |
| CN945574 | CN869241 | DY977425 | DW124766 | AV923040 | BJ468757 |
| CN945574 | CN870230 | DY977502 | DY973854 | AV923040 | BJ468773 |
| CN945574 | CN870494 | DY977555 | DW133987 | AV923040 | BJ468797 |
| CN945574 | CN879514 | DY977561 | DY982933 | AV923040 | BJ468826 |
| CN945574 | CN879921 | DY977564 | DW125499 | AV923040 | BJ468846 |
| CN945574 | CN943203 | DY977610 | DY973021 | AV923040 | BJ468869 |
| CN945574 | CN945556 | DY977621 | DW136408 | AV923040 | BJ468885 |
| CN945848 | CN936043 | DY977621 | DW138045 | AV923040 | BJ468913 |
| CN945905 | CN939665 | DY977658 | DY984603 | AV923040 | BJ472101 |
| CN945925 | CN857056 | DY977669 | DW124076 | AV923108 | AV913898 |
| CN945939 | CN939665 | DY977669 | DW124320 | AV923108 | AV917253 |
| CN946140 | EB107539 | DY977758 | BQ858010 | AV923108 | AV921512 |
| CN946199 | CN869038 | DY977758 | BQ864593 | AV923108 | AV931397 |
| CN946203 | EB149092 | DY977764 | DW135413 | AV923226 | AV918156 |
| CN946249 | CN873929 | DY977785 | DY984416 | AV923504 | AV927019 |
| CN946249 | CN907126 | DY977823 | DW136883 | AV923504 | AV930401 |
| CN946249 | CN907280 | DY977845 | BQ874370 | AV923571 | BJ468754 |
| CN946249 | CN907355 | DY977913 | DY970950 | AV923578 | AV925248 |
| CN946249 | CN939782 | DY977916 | DY978148 | AV923578 | AV927019 |
| CN946249 | CN942901 | DY977919 | DW133229 | AV923578 | AV930401 |
| CN946249 | CN943538 | DY977961 | DY974325 | AV923633 | BJ470897 |
| CN946249 | CN948123 | DY977970 | DY983793 | AV923680 | AV930401 |
| CN946249 | EB148133 | DY977975 | DY980870 | AV923759 | AV915963 |
| CN946249 | EB148180 | DY977978 | DW133573 | AV923792 | AV925248 |
| CN946295 | EB150864 | DY977978 | DW133643 | AV923792 | AV927019 |
| CN946329 | CN904432 | DY978018 | DW135957 | AV923792 | AV930401 |
| CN946329 | CN905076 | DY978036 | DW133705 | AV923848 | AV926368 |
| CN946329 | CN942559 | DY978049 | DW140964 | AV924062 | AV926368 |
| CN946395 | CN938983 | DY978057 | BQ854286 | AV924065 | AV927019 |
| CN946423 | CN873929 | DY978057 | DY974048 | AV924065 | AV930401 |
| CN946423 | CN878903 | DY978094 | BQ873588 | AV924156 | BY842254 |
| CN946423 | CN906951 | DY978146 | DW138418 | AV924284 | AV932303 |
| CN946423 | CN907126 | DY978229 | DY979074 | AV924284 | AV934156 |
| CN946423 | CN907280 | DY978241 | BQ858542 | AV924284 | AV936409 |
| CN946423 | CN907350 | DY978257 | DY984811 | AV924284 | BJ469849 |
| CN946423 | CN907355 | DY978270 | DY983169 | AV924284 | BJ474472 |
| CN946423 | CN930709 | DY978278 | BQ856909 | AV924290 | AV925042 |
| CN946423 | CN931638 | DY978323 | DY974106 | AV924290 | AV935147 |
| CN946423 | CN939782 | DY978374 | DW135957 | AV924290 | BJ476226 |

|          |          |          |          |          |          |
|----------|----------|----------|----------|----------|----------|
| CN946423 | CN942901 | DY978396 | DW125115 | AV924316 | AV925248 |
| CN946423 | CN943336 | DY978396 | DW128988 | AV924316 | AV927019 |
| CN946423 | CN943538 | DY978396 | DW134248 | AV924316 | AV930401 |
| CN946423 | CN943728 | DY978396 | DW134341 | AV924324 | AV927019 |
| CN946423 | CN945200 | DY978396 | DW136547 | AV924324 | AV930401 |
| CN946423 | CN948123 | DY978396 | DW136589 | AV924363 | AV912771 |
| CN946423 | CN948142 | DY978396 | DW138610 | AV924363 | AV924120 |
| CN946423 | CN948761 | DY978396 | DW138893 | AV924363 | AV924960 |
| CN946423 | EB148133 | DY978396 | DW139709 | AV924363 | AV925417 |
| CN946423 | EB148180 | DY978396 | DW139811 | AV924363 | AV925885 |
| CN946427 | CN931801 | DY978396 | DW140321 | AV924363 | AV925897 |
| CN946459 | CN944412 | DY978421 | BQ850492 | AV924363 | AV925994 |
| CN946822 | CN850177 | DY978440 | DW139664 | AV924363 | AV926001 |
| CN946822 | CN851144 | DY978440 | DY981111 | AV924363 | AV926518 |
| CN946830 | CN882643 | DY978523 | DY977523 | AV924363 | AV927325 |
| CN946849 | CN880899 | DY978525 | DY964941 | AV924363 | AV928438 |
| CN946936 | CN906951 | DY978547 | DY969699 | AV924363 | AV928545 |
| CN946936 | CN907350 | DY978566 | BQ872607 | AV924363 | AV928655 |
| CN946936 | CN907355 | DY978566 | DW125393 | AV924363 | AV928664 |
| CN946945 | CN947207 | DY978567 | DW133573 | AV924363 | AV928667 |
| CN946951 | EB136414 | DY978567 | DW133643 | AV924363 | AV928792 |
| CN946992 | CN894674 | DY978603 | BQ852904 | AV924363 | AV929215 |
| CN946992 | CN906898 | DY978691 | DY963945 | AV924363 | AV931913 |
| CN947043 | CN885639 | DY978691 | DY966699 | AV924363 | AV933170 |
| CN947043 | CN886442 | DY978695 | DY969648 | AV924363 | AV933846 |
| CN947043 | CN937742 | DY978710 | DY981425 | AV924363 | AV933871 |
| CN947070 | CN947207 | DY978749 | BQ864874 | AV924363 | AV934410 |
| CN947100 | CN864150 | DY978768 | DW137795 | AV924363 | AV934411 |
| CN947100 | CN878048 | DY978768 | DY960132 | AV924363 | AV934665 |
| CN947100 | CN880822 | DY978823 | DY974947 | AV924363 | AV935747 |
| CN947100 | CN881465 | DY978827 | DW131008 | AV924363 | AV936410 |
| CN947100 | CN887713 | DY978827 | DW131824 | AV924363 | AV937039 |
| CN947100 | CN891681 | DY978827 | DW131902 | AV924363 | AV937049 |
| CN947229 | CN883025 | DY978873 | DW140299 | AV924363 | AV937168 |
| CN947229 | CN884591 | DY978875 | DW138004 | AV924363 | BJ467300 |
| CN947229 | CN944927 | DY978898 | DY969042 | AV924363 | BJ468970 |
| CN947568 | CN873929 | DY978919 | DW137923 | AV924363 | BJ469310 |
| CN947568 | CN907280 | DY978935 | DY973172 | AV924363 | BJ469421 |
| CN947568 | CN907355 | DY978941 | DW141473 | AV924363 | BJ469589 |
| CN947568 | CN948123 | DY978978 | DW137413 | AV924363 | BJ469879 |
| CN947568 | EB148133 | DY978986 | BQ869140 | AV924363 | BJ470853 |
| CN947568 | EB148180 | DY978998 | DW123790 | AV924363 | BJ471023 |
| CN947613 | CN919229 | DY978998 | DW125263 | AV924363 | BJ472167 |
| CN947613 | CN919342 | DY979000 | DW137754 | AV924363 | BJ472704 |
| CN947613 | CN940104 | DY979000 | DY982385 | AV924363 | BJ472881 |
| CN947613 | EB148112 | DY979000 | DY982590 | AV924363 | BJ472892 |
| CN947661 | CN849780 | DY979000 | DY984783 | AV924363 | BJ473216 |
| CN947661 | CN850504 | DY979018 | BQ863818 | AV924363 | BJ473529 |
| CN947720 | EB148425 | DY979084 | BQ849824 | AV924363 | BJ473558 |
| CN947734 | CN938622 | DY979086 | DY979301 | AV924363 | BJ474017 |
| CN947734 | CN941092 | DY979135 | DW143141 | AV924363 | BJ474321 |
| CN947734 | CN944141 | DY979146 | DY974126 | AV924363 | BJ474717 |



|          |          |          |          |          |          |
|----------|----------|----------|----------|----------|----------|
| CN947734 | CN946440 | DY979168 | DW124616 | AV924363 | BJ475869 |
| CN947734 | CN947738 | DY979198 | DY973695 | AV924363 | BJ476103 |
| CN947841 | CN935207 | DY979202 | DY980666 | AV924363 | BJ476128 |
| CN947841 | CN943194 | DY979208 | DW136879 | AV924363 | BJ476562 |
| CN947841 | CN944100 | DY979218 | DY967070 | AV924363 | BJ476659 |
| CN947841 | CN948399 | DY979264 | BQ854126 | AV924363 | BJ477052 |
| CN947863 | EB149092 | DY979264 | DY981798 | AV924363 | BJ477278 |
| CN947901 | EB147413 | DY979290 | DY976315 | AV924428 | AV924107 |
| CN947963 | CN940596 | DY979311 | DY984318 | AV924428 | AV926368 |
| CN947963 | EB117554 | DY979321 | BQ858567 | AV924467 | AV926996 |
| CN947963 | EB124113 | DY979323 | DY971281 | AV924467 | BJ464304 |
| CN947963 | EB126620 | DY979335 | BQ874607 | AV924534 | AV926368 |
| CN947963 | EB127561 | DY979341 | DY982383 | AV924549 | BY844533 |
| CN947963 | EB135819 | DY979416 | DY985090 | AV924549 | BY845355 |
| CN947963 | EB136564 | DY979417 | BQ867298 | AV924549 | BY846121 |
| CN947963 | EB136732 | DY979511 | DY982305 | AV924549 | BY846306 |
| CN947963 | EB137844 | DY979529 | BQ845874 | AV924549 | BY846523 |
| CN947963 | EB137919 | DY979543 | DY979678 | AV924549 | BY846548 |
| CN947963 | EB143372 | DY979545 | BQ855262 | AV924549 | BY846742 |
| CN947963 | EB144917 | DY979546 | DY984318 | AV924549 | BY846822 |
| CN947963 | EB144931 | DY979583 | DY960845 | AV924549 | BY847508 |
| CN947963 | EB146300 | DY979647 | DY960709 | AV924549 | BY847638 |
| CN947963 | EB157154 | DY979651 | DY974945 | AV924549 | BY848461 |
| CN948001 | CN940501 | DY979673 | BQ850005 | AV924560 | AV931758 |
| CN948001 | EB143348 | DY979684 | DY966054 | AV924649 | AV926628 |
| CN948001 | EB143362 | DY979778 | DW130912 | AV924709 | AV913650 |
| CN948012 | CN873929 | DY979786 | DY960709 | AV924709 | AV913703 |
| CN948012 | CN879960 | DY979812 | DW139206 | AV924709 | AV914708 |
| CN948012 | CN907246 | DY979828 | BQ845874 | AV924709 | AV915981 |
| CN948012 | CN919240 | DY979853 | DW128936 | AV924709 | AV922759 |
| CN948012 | CN931638 | DY979922 | BQ853408 | AV924709 | AV922777 |
| CN948012 | CN934605 | DY979985 | DY975842 | AV924709 | AV923032 |
| CN948012 | CN936965 | DY980018 | BQ872907 | AV924709 | AV923211 |
| CN948012 | CN938978 | DY980018 | BQ873864 | AV924709 | AV923412 |
| CN948012 | CN940031 | DY980018 | BQ874939 | AV924709 | AV923457 |
| CN948012 | CN941534 | DY980018 | BQ875480 | AV924709 | AV923525 |
| CN948012 | CN941566 | DY980018 | BQ875591 | AV924709 | AV924031 |
| CN948012 | CN946809 | DY980018 | BQ875804 | AV924709 | AV924034 |
| CN948012 | CN947320 | DY980040 | DY979716 | AV924709 | AV924144 |
| CN948012 | CN948761 | DY980047 | DY964517 | AV924709 | AV924217 |
| CN948012 | CN948805 | DY980075 | DW135631 | AV924709 | AV924221 |
| CN948012 | EB148180 | DY980090 | DY980532 | AV924709 | AV924248 |
| CN948012 | EB148478 | DY980117 | DY974188 | AV924709 | AV924302 |
| CN948012 | EB148759 | DY980190 | DW125763 | AV924709 | AV924311 |
| CN948031 | CN907280 | DY980234 | DW135626 | AV924709 | AV924848 |
| CN948031 | CN930734 | DY980247 | DY962172 | AV924709 | AV924986 |
| CN948031 | CN948142 | DY980247 | DY974197 | AV924709 | AV925195 |
| CN948031 | EB147518 | DY980312 | DY985097 | AV924709 | AV925262 |
| CN948031 | EB148665 | DY980344 | DY979027 | AV924709 | AV925458 |
| CN948077 | CN947550 | DY980387 | DY979279 | AV924709 | AV925473 |
| CN948146 | CN939800 | DY980387 | DY983479 | AV924709 | AV925526 |
| CN948158 | CN873929 | DY980398 | DY964142 | AV924709 | AV925533 |

|          |          |          |          |          |          |
|----------|----------|----------|----------|----------|----------|
| CN948158 | CN878903 | DY980428 | DY979042 | AV924709 | AV926052 |
| CN948158 | CN879960 | DY980450 | DY979374 | AV924709 | AV926144 |
| CN948158 | CN881681 | DY980460 | DY963348 | AV924709 | AV926152 |
| CN948158 | CN906951 | DY980516 | DY983736 | AV924709 | AV926322 |
| CN948158 | CN907126 | DY980539 | DY985090 | AV924709 | AV926394 |
| CN948158 | CN907246 | DY980561 | DY984830 | AV924709 | AV926461 |
| CN948158 | CN907280 | DY980607 | DY962243 | AV924709 | AV926526 |
| CN948158 | CN907350 | DY980607 | DY963624 | AV924709 | AV926697 |
| CN948158 | CN907355 | DY980660 | DW137785 | AV924709 | AV926811 |
| CN948158 | CN919240 | DY980660 | DY984164 | AV924709 | AV926851 |
| CN948158 | CN930709 | DY980661 | DW135860 | AV924709 | AV927056 |
| CN948158 | CN930734 | DY980675 | DY971408 | AV924709 | AV927066 |
| CN948158 | CN931638 | DY980723 | DW136570 | AV924709 | BJ463002 |
| CN948158 | CN934605 | DY980739 | BQ849795 | AV924709 | BJ463836 |
| CN948158 | CN936965 | DY980739 | BQ849824 | AV924709 | BJ468785 |
| CN948158 | CN939782 | DY980739 | BQ863666 | AV924792 | BY861274 |
| CN948158 | CN940031 | DY980763 | BQ872256 | AV924793 | BY861274 |
| CN948158 | CN941534 | DY980774 | DW140018 | AV924811 | AV920597 |
| CN948158 | CN941566 | DY980795 | BQ867491 | AV924843 | AV930218 |
| CN948158 | CN943336 | DY980874 | DY974808 | AV924849 | AV925042 |
| CN948158 | CN943728 | DY980923 | DY974106 | AV924849 | AV932303 |
| CN948158 | CN945200 | DY981045 | DW140625 | AV924849 | AV934156 |
| CN948158 | CN948142 | DY981114 | DY978148 | AV924849 | AV936409 |
| CN948158 | CN948638 | DY981117 | BQ872596 | AV924849 | BJ469647 |
| CN948158 | CN948761 | DY981118 | DW135742 | AV924849 | BJ469849 |
| CN948158 | CN948805 | DY981255 | BQ856518 | AV924849 | BJ473143 |
| CN948158 | EB147518 | DY981274 | DY974106 | AV924849 | BJ474472 |
| CN948158 | EB148133 | DY981280 | DY977329 | AV924903 | AV927019 |
| CN948158 | EB148180 | DY981280 | DY977717 | AV924903 | AV930401 |
| CN948158 | EB148478 | DY981282 | DY979471 | AV924946 | AV915573 |
| CN948158 | EB148493 | DY981385 | DY967238 | AV924946 | AV915619 |
| CN948158 | EB148665 | DY981420 | DY963127 | AV924946 | AV920675 |
| CN948158 | EB148759 | DY981422 | BQ873466 | AV924946 | BJ463223 |
| CN948304 | CN940501 | DY981429 | DW140139 | AV925039 | AV919492 |
| CN948304 | EB143348 | DY981430 | DY977933 | AV925067 | AV920564 |
| CN948360 | EB147413 | DY981499 | DW125162 | AV925091 | AV919036 |
| CN948362 | EB150864 | DY981575 | DW131705 | AV925128 | AV914965 |
| CN948446 | CN868520 | DY981575 | DW131772 | AV925161 | AV931890 |
| CN948446 | CN869241 | DY981583 | BQ865551 | AV925209 | AV926368 |
| CN948446 | CN870119 | DY981589 | DW128164 | AV925209 | BJ468912 |
| CN948446 | CN870230 | DY981608 | DY984115 | AV925251 | AV926368 |
| CN948446 | CN879514 | DY981636 | DY969367 | AV925339 | BY845521 |
| CN948446 | CN879921 | DY981636 | DY984652 | AV925376 | BY871745 |
| CN948446 | CN883940 | DY981652 | DY983106 | AV925470 | BY836159 |
| CN948446 | CN890504 | DY981707 | DW137847 | AV925470 | BY838255 |
| CN948446 | CN901911 | DY981741 | DY968422 | AV925470 | BY838887 |
| CN948446 | CN940836 | DY981769 | DW131280 | AV925470 | BY839978 |
| CN948446 | CN943203 | DY981793 | DY975532 | AV925470 | BY840394 |
| CN948446 | CN945556 | DY981847 | DY968189 | AV925470 | BY841724 |
| CN948446 | EB147178 | DY981865 | DY980443 | AV925470 | BY842696 |
| CN948462 | CN938983 | DY981924 | DY974195 | AV925470 | BY852152 |
| CN948636 | CN944483 | DY981939 | DY982697 | AV925544 | BY836159 |

|          |          |          |          |          |          |
|----------|----------|----------|----------|----------|----------|
| CN948692 | EB117757 | DY982025 | DW139293 | AV925544 | BY840394 |
| CN948692 | EB136403 | DY982025 | DW140492 | AV925584 | AV928483 |
| CN948779 | CN922201 | DY982026 | BQ853640 | AV925615 | AV924107 |
| CN948816 | CN885639 | DY982048 | BQ859577 | AV925615 | AV926368 |
| CN948816 | CN919427 | DY982055 | DY976996 | AV925638 | AV933334 |
| CN949061 | EB150784 | DY982066 | DW135626 | AV925649 | AV924960 |
| CN949202 | CN948485 | DY982119 | DW125239 | AV925649 | AV926518 |
| CN949531 | CN887144 | DY982152 | DY982618 | AV925649 | AV928667 |
| EB105940 | EB152950 | DY982155 | DW141843 | AV925649 | AV929215 |
| EB105957 | EB141159 | DY982192 | DW123987 | AV925649 | AV931913 |
| EB105969 | CN878988 | DY982257 | DW124344 | AV925649 | AV934410 |
| EB106135 | EB151104 | DY982292 | DY973694 | AV925649 | AV934411 |
| EB106163 | CN864163 | DY982316 | DY984115 | AV925649 | AV936410 |
| EB106195 | EB152950 | DY982318 | DY984115 | AV925649 | BJ467300 |
| EB106597 | EB144629 | DY982325 | DW141025 | AV925649 | BJ469310 |
| EB106659 | CN864163 | DY982328 | DW141843 | AV925649 | BJ469589 |
| EB106702 | CN874887 | DY982346 | DW130214 | AV925649 | BJ469879 |
| EB106702 | CN930302 | DY982346 | DY981952 | AV925649 | BJ470853 |
| EB106702 | EB109058 | DY982367 | BQ850005 | AV925649 | BJ472167 |
| EB106702 | EB113030 | DY982385 | DY982590 | AV925649 | BJ472704 |
| EB106702 | EB113086 | DY982392 | DY960709 | AV925649 | BJ472881 |
| EB106702 | EB116983 | DY982418 | DY976315 | AV925649 | BJ473558 |
| EB106702 | EB120194 | DY982468 | DW132147 | AV925649 | BJ474321 |
| EB106702 | EB124973 | DY982490 | DY972972 | AV925649 | BJ476562 |
| EB106702 | EB125052 | DY982511 | DY962354 | AV925649 | BJ476659 |
| EB106702 | EB127693 | DY982529 | DW139773 | AV925649 | BJ477278 |
| EB106702 | EB135055 | DY982529 | DW139870 | AV925726 | BY846520 |
| EB106702 | EB145383 | DY982569 | DY966506 | AV925863 | BJ547426 |
| EB106754 | EB106104 | DY982604 | DW141843 | AV925898 | AV919492 |
| EB106819 | CN887905 | DY982642 | DY978909 | AV925972 | BY841317 |
| EB107081 | EB106104 | DY982659 | DY979188 | AV926205 | AV929012 |
| EB107227 | EB128271 | DY982773 | DW134690 | AV926205 | BY836879 |
| EB107356 | EB106104 | DY982793 | BQ869140 | AV926205 | BY840816 |
| EB107356 | EB106823 | DY982835 | DW129726 | AV926205 | BY850231 |
| EB107356 | EB157365 | DY982845 | DY984764 | AV926216 | AV912816 |
| EB107388 | EB106104 | DY982878 | DW135957 | AV926283 | AV923315 |
| EB107515 | CN887905 | DY982929 | DY965460 | AV926283 | AV924026 |
| EB107890 | EB118399 | DY982929 | DY975585 | AV926283 | AV925677 |
| EB107996 | EB107746 | DY982983 | DW139916 | AV926283 | BJ547316 |
| EB108016 | EB113752 | DY982983 | DW143826 | AV926283 | BY835881 |
| EB108519 | EB107578 | DY983006 | DY969489 | AV926283 | BY839293 |
| EB109534 | CN879176 | DY983093 | DY977960 | AV926283 | BY844032 |
| EB109766 | CN864163 | DY983112 | DY969648 | AV926283 | BY846236 |
| EB109938 | EB152950 | DY983130 | BQ865551 | AV926327 | BJ549125 |
| EB109940 | EB113030 | DY983192 | BQ845033 | AV926458 | AV917339 |
| EB109940 | EB116983 | DY983192 | BQ859120 | AV926458 | AV917457 |
| EB109940 | EB120194 | DY983192 | BQ874431 | AV926458 | AV922788 |
| EB109940 | EB124973 | DY983207 | DY963348 | AV926458 | AV923006 |
| EB109940 | EB125052 | DY983217 | DY967848 | AV926458 | AV923069 |
| EB109962 | EB149400 | DY983219 | DW138876 | AV926458 | AV923214 |
| EB113118 | EB108015 | DY983219 | DW140095 | AV926458 | AV923271 |
| EB113234 | CN855318 | DY983260 | BQ875350 | AV926458 | AV923603 |

|          |          |          |          |          |          |
|----------|----------|----------|----------|----------|----------|
| EB113299 | CN855318 | DY983340 | DY972339 | AV926458 | AV924249 |
| EB113349 | EB107774 | DY983348 | DY973792 | AV926458 | AV924598 |
| EB113349 | EB108670 | DY983372 | DY973675 | AV926458 | AV924736 |
| EB113349 | EB108791 | DY983398 | DW125499 | AV926458 | AV924759 |
| EB113420 | EB118506 | DY983460 | DY971960 | AV926458 | AV924894 |
| EB113550 | EB113407 | DY983474 | DY984179 | AV926458 | AV924958 |
| EB113550 | EB118600 | DY983545 | DY963144 | AV926458 | AV925185 |
| EB113560 | EB118506 | DY983627 | DY969444 | AV926458 | AV925678 |
| EB113577 | EB113335 | DY983645 | DW132927 | AV926458 | AV925688 |
| EB113985 | EB108670 | DY983651 | DW141165 | AV926458 | AV925736 |
| EB113985 | EB113407 | DY983671 | DW127570 | AV926458 | AV926157 |
| EB113985 | EB118600 | DY983688 | BQ851796 | AV926458 | AV926191 |
| EB114065 | EB118506 | DY983707 | DW134488 | AV926458 | AV926321 |
| EB114230 | CN923139 | DY983707 | DY978148 | AV926458 | AV926624 |
| EB114252 | EB113588 | DY983711 | DY979247 | AV926458 | AV926781 |
| EB114252 | EB149088 | DY983735 | BQ853640 | AV926458 | AV926786 |
| EB114497 | EB113148 | DY983915 | DY962406 | AV926458 | AV927021 |
| EB114497 | EB113246 | DY983922 | DY964351 | AV926458 | AV927072 |
| EB114497 | EB113335 | DY983927 | DY984409 | AV926458 | AV927893 |
| EB114552 | CN864163 | DY983940 | DW131505 | AV926458 | AV932633 |
| EB114597 | EB143757 | DY983940 | DW131915 | AV926458 | AV932684 |
| EB114818 | CN864163 | DY983968 | DW136880 | AV926458 | AV933168 |
| EB114963 | EB128432 | DY983991 | DY962697 | AV926458 | AV933480 |
| EB114963 | EB144556 | DY983995 | DY970410 | AV926458 | AV933954 |
| EB115109 | EB150362 | DY984048 | DY980158 | AV926458 | AV933986 |
| EB115109 | EB151105 | DY984113 | DY969648 | AV926458 | AV934131 |
| EB115179 | CN864163 | DY984180 | DY978992 | AV926458 | AV934207 |
| EB115220 | CN864163 | DY984180 | DY985008 | AV926458 | BJ463891 |
| EB115827 | EB118034 | DY984188 | BQ854104 | AV926458 | BJ468839 |
| EB115827 | EB121127 | DY984188 | BQ863197 | AV926458 | BJ469392 |
| EB115886 | EB110059 | DY984211 | DW134068 | AV926458 | BJ469541 |
| EB115909 | CN864163 | DY984228 | DY971354 | AV926458 | BJ470551 |
| EB116016 | EB123526 | DY984231 | BQ859177 | AV926458 | BJ470975 |
| EB116091 | CN864163 | DY984231 | DY959648 | AV926458 | BJ472299 |
| EB116120 | CN864163 | DY984231 | DY974625 | AV926458 | BJ472309 |
| EB116147 | EB120167 | DY984342 | DY964339 | AV926458 | BJ472822 |
| EB116152 | CN864163 | DY984370 | DY984702 | AV926458 | BJ476926 |
| EB116227 | EB116702 | DY984393 | DW135090 | AV926625 | AV914294 |
| EB116284 | EB123515 | DY984394 | DY975842 | AV926700 | BY844353 |
| EB116284 | EB150786 | DY984431 | BQ872880 | AV926700 | BY847689 |
| EB116340 | CN864163 | DY984501 | DY981363 | AV926700 | BY849716 |
| EB116402 | EB148003 | DY984526 | DY962235 | AV926720 | AV924107 |
| EB116426 | EB137843 | DY984601 | DW126017 | AV926720 | AV926368 |
| EB116552 | CN864163 | DY984611 | DW126159 | AV926720 | BJ468912 |
| EB116592 | EB123174 | DY984618 | BQ848457 | AV926766 | AV920597 |
| EB116652 | EB151104 | DY984618 | BQ848955 | AV926773 | AV913013 |
| EB116696 | EB130880 | DY984618 | DW134423 | AV926773 | AV913024 |
| EB116721 | EB175385 | DY984675 | DY979074 | AV926773 | AV914776 |
| EB116866 | CN864163 | DY984679 | DW140018 | AV926773 | AV914797 |
| EB117247 | CN864163 | DY984689 | DW126905 | AV926773 | AV915131 |
| EB117405 | CN864163 | DY984708 | DY961823 | AV926773 | AV915238 |
| EB117578 | CN864163 | DY984736 | BQ860680 | AV926773 | AV915439 |

|          |          |              |            |          |          |
|----------|----------|--------------|------------|----------|----------|
| EB117665 | CN864163 | DY984798     | DY978663   | AV926773 | AV915678 |
| EB117675 | EB177619 | DY984809     | DY981044   | AV926773 | AV915969 |
| EB117887 | CN864163 | DY984823     | BQ851141   | AV926773 | AV916074 |
| EB117934 | EB140966 | DY984823     | BQ863818   | AV926773 | AV916194 |
| EB117934 | EB142947 | DY984840     | DY977230   | AV926773 | AV916218 |
| EB117951 | EB107245 | DY984850     | DY963513   | AV926773 | AV916279 |
| EB117976 | EB123314 | DY984858     | DY964923   | AV926773 | AV917104 |
| EB117976 | EB137967 | DY984919     | DY979875   | AV926773 | AV917120 |
| EB117976 | EB138101 | DY984975     | BQ851141   | AV926773 | AV917315 |
| EB117976 | EB142847 | DY984975     | BQ863818   | AV926773 | AV922701 |
| EB118057 | CN864163 | DY984975     | DY961700   | AV926773 | AV922706 |
| EB118463 | EB118530 | DY984988     | DW138794   | AV926773 | AV922858 |
| EB118565 | CN885033 | DY984988     | DW139117   | AV926773 | AV923059 |
| EB118616 | EB108169 | DY985015     | DY981076   | AV926773 | AV923075 |
| EB118617 | EB118667 | DY985035     | DW125393   | AV926773 | AV923085 |
| EB118689 | EB118543 | DY985101     | DY984605   | AV926773 | AV923106 |
| EB118756 | EB107837 | DY985127     | DW139293   | AV926773 | AV923117 |
| EB118756 | EB113885 | DY985127     | DW140492   | AV926773 | AV923129 |
| EB118756 | EB113936 | <i>Oryza</i> | nipponbare | AV926773 | AV923138 |
| EB118756 | EB128392 | EST1         | EST2       | AV926773 | AV923169 |
| EB118961 | EB121070 | AU030077     | CI380238   | AV926773 | AV923210 |
| EB118961 | EB122663 | AU030613     | CI062335   | AV926773 | AV923275 |
| EB118993 | EB125093 | AU030613     | CI163155   | AV926773 | AV923298 |
| EB118996 | EB135558 | AU030613     | CI204019   | AV926773 | AV923299 |
| EB118996 | EB137454 | AU030613     | CI262207   | AV926773 | AV923310 |
| EB119058 | EB143757 | AU056811     | CI535031   | AV926773 | AV923336 |
| EB119058 | EB148003 | AU057437     | CB649914   | AV926773 | AV923436 |
| EB119070 | EB120287 | AU057437     | CB653078   | AV926773 | AV923455 |
| EB119134 | EB119752 | AU057437     | CB664263   | AV926773 | AV923465 |
| EB119134 | EB120167 | AU057437     | CB667632   | AV926773 | AV923533 |
| EB119134 | EB136784 | AU057437     | CB681303   | AV926773 | AV923606 |
| EB119160 | EB144958 | AU057437     | CI112966   | AV926773 | AV923607 |
| EB119197 | EB119036 | AU057437     | CI356078   | AV926773 | AV923647 |
| EB119239 | EB143076 | AU057437     | CI492549   | AV926773 | AV923662 |
| EB119239 | EB146358 | AU057437     | CI508875   | AV926773 | AV923674 |
| EB119264 | EB145088 | AU057437     | CI510146   | AV926773 | AV923730 |
| EB119409 | EB141379 | AU057437     | CI512017   | AV926773 | AV923776 |
| EB119572 | EB119036 | AU057437     | CI515097   | AV926773 | AV923777 |
| EB119583 | EB134183 | AU064356     | CI728644   | AV926773 | AV923786 |
| EB119712 | EB119036 | AU065055     | CI760170   | AV926773 | AV923822 |
| EB119712 | EB120287 | AU065600     | CI736951   | AV926773 | AV923834 |
| EB119716 | CN864163 | AU065601     | CI010937   | AV926773 | AV923894 |
| EB119735 | CN864163 | AU065849     | CI655837   | AV926773 | AV923912 |
| EB119766 | EB120167 | AU065868     | C97511     | AV926773 | AV923956 |
| EB119766 | EB136784 | AU065868     | CB656469   | AV926773 | AV924003 |
| EB119785 | EB133754 | AU065975     | CI655837   | AV926773 | AV924071 |
| EB119913 | CN864163 | AU068853     | CI654800   | AV926773 | AV924097 |
| EB119984 | EB122490 | AU082311     | CI483264   | AV926773 | AV924124 |
| EB119999 | EB118951 | AU083000     | CB645424   | AV926773 | AV924151 |
| EB120001 | CN864163 | AU091801     | CI305183   | AV926773 | AV924198 |
| EB120114 | EB128761 | AU092719     | AU163271   | AV926773 | AV924212 |
| EB120114 | EB130862 | AU095235     | CI731970   | AV926773 | AV924213 |

|          |          |          |          |          |          |
|----------|----------|----------|----------|----------|----------|
| EB120114 | EB134437 | AU096433 | AU065226 | AV926773 | AV924256 |
| EB120177 | CN864163 | AU096433 | CI309519 | AV926773 | AV924275 |
| EB120271 | CN864163 | AU096433 | CI694913 | AV926773 | AV924389 |
| EB120314 | CN864163 | AU096561 | CI167579 | AV926773 | AV924554 |
| EB120441 | CN864163 | AU096877 | AU222954 | AV926773 | AV924582 |
| EB120484 | CN864163 | AU101359 | CI518144 | AV926773 | AV924599 |
| EB120684 | EB118399 | AU160931 | D22864   | AV926773 | AV924643 |
| EB121324 | EB123174 | AU160974 | AU108915 | AV926773 | AV924717 |
| EB121339 | EB129879 | AU160974 | CI283480 | AV926773 | AV924749 |
| EB121339 | EB129880 | AU161009 | CI654800 | AV926773 | AV924787 |
| EB121410 | EB123174 | AU161649 | CI132767 | AV926773 | AV924831 |
| EB121516 | EB114312 | AU163824 | CI006613 | AV926773 | AV924837 |
| EB121677 | CN871131 | AU165672 | CI101968 | AV926773 | AV924838 |
| EB121866 | EB110277 | AU165672 | CI102286 | AV926773 | AV924882 |
| EB121946 | CN939046 | AU165795 | AU031271 | AV926773 | AV924952 |
| EB122245 | EB123605 | AU165795 | AU064376 | AV926773 | AV925053 |
| EB122263 | EB123174 | AU165795 | AU078682 | AV926773 | AV925075 |
| EB122289 | EB121127 | AU165795 | AU183302 | AV926773 | AV925087 |
| EB122534 | EB145393 | AU165795 | CI034171 | AV926773 | AV925186 |
| EB122635 | EB127199 | AU165795 | CI055134 | AV926773 | AV925260 |
| EB122635 | EB130901 | AU165795 | CI056867 | AV926773 | AV925263 |
| EB122639 | EB144629 | AU165795 | CI058495 | AV926773 | AV925386 |
| EB122714 | EB124101 | AU165795 | CI058499 | AV926773 | AV925413 |
| EB122784 | CN878988 | AU165795 | CI058752 | AV926773 | AV925543 |
| EB122902 | EB113148 | AU165795 | CI059244 | AV926773 | AV925593 |
| EB122963 | CN871131 | AU165795 | CI059369 | AV926773 | AV925686 |
| EB122982 | EB119336 | AU165795 | CI059928 | AV926773 | AV925699 |
| EB123023 | EB118399 | AU165795 | CI059961 | AV926773 | AV925749 |
| EB123121 | EB129879 | AU165795 | CI060205 | AV926773 | AV925759 |
| EB123121 | EB129880 | AU165795 | CI061328 | AV926773 | AV925795 |
| EB123138 | EB123174 | AU165795 | CI061581 | AV926773 | AV925899 |
| EB123199 | CN931759 | AU165795 | CI061663 | AV926773 | AV925900 |
| EB123304 | EB121800 | AU165795 | CI062490 | AV926773 | AV925990 |
| EB123311 | EB137250 | AU165795 | CI064699 | AV926773 | AV926099 |
| EB123364 | EB137968 | AU165795 | CI064715 | AV926773 | AV926177 |
| EB123393 | EB123174 | AU165795 | CI090177 | AV926773 | AV926210 |
| EB123459 | CN948787 | AU165795 | CI093328 | AV926773 | AV926217 |
| EB123459 | EB128078 | AU165795 | CI102249 | AV926773 | AV926244 |
| EB123478 | EB121999 | AU165795 | CI102514 | AV926773 | AV926252 |
| EB123478 | EB122911 | AU165795 | CI169787 | AV926773 | AV926310 |
| EB123478 | EB122935 | AU165795 | CI170222 | AV926773 | AV926335 |
| EB123663 | EB120995 | AU165795 | CI172654 | AV926773 | AV926359 |
| EB123674 | CN948787 | AU165795 | CI173323 | AV926773 | AV926374 |
| EB123674 | EB128078 | AU165795 | CI173416 | AV926773 | AV926408 |
| EB123674 | EB134218 | AU165795 | CI174072 | AV926773 | AV926417 |
| EB123928 | EB151105 | AU165795 | CI174683 | AV926773 | AV926448 |
| EB123965 | CN878651 | AU165795 | CI185609 | AV926773 | AV926490 |
| EB124037 | CN878651 | AU165795 | CI204178 | AV926773 | AV926533 |
| EB124051 | EB125096 | AU165795 | CI204729 | AV926773 | AV926560 |
| EB124123 | CN864163 | AU165795 | CI206663 | AV926773 | AV926575 |
| EB124130 | CN864163 | AU165795 | CI207708 | AV926773 | AV926639 |
| EB124307 | CN941210 | AU165795 | CI207773 | AV926773 | AV926640 |

|          |          |          |          |          |          |
|----------|----------|----------|----------|----------|----------|
| EB124377 | CN931759 | AU165795 | CI207890 | AV926773 | AV926686 |
| EB124385 | EB152950 | AU165795 | CI208473 | AV926773 | AV926775 |
| EB124394 | EB124140 | AU165795 | CI209180 | AV926773 | AV926832 |
| EB124532 | EB152950 | AU165795 | CI209212 | AV926773 | AV926872 |
| EB124558 | EB125192 | AU165795 | CI212250 | AV926773 | AV926920 |
| EB124600 | EB126678 | AU165795 | CI236754 | AV926773 | AV926943 |
| EB124611 | CN882643 | AU165795 | CI237640 | AV926773 | AV926962 |
| EB124624 | CN864163 | AU165795 | CI237856 | AV926773 | AV926971 |
| EB124637 | CN864163 | AU165795 | CI238165 | AV926773 | AV927006 |
| EB124735 | EB124489 | AU165795 | CI239153 | AV926773 | AV927136 |
| EB124735 | EB132432 | AU165795 | CI240840 | AV926773 | AV932007 |
| EB124736 | EB141379 | AU165795 | CI254834 | AV926773 | AV932011 |
| EB124844 | CN864163 | AU165795 | CI267762 | AV926773 | AV932034 |
| EB124877 | EB126678 | AU165795 | CI284020 | AV926773 | AV932958 |
| EB124882 | CN864163 | AU165795 | CI284105 | AV926773 | BJ462641 |
| EB124898 | CN864163 | AU165795 | CI307973 | AV926773 | BJ462906 |
| EB124913 | CN864163 | AU165795 | CI404897 | AV926773 | BJ462907 |
| EB124969 | CN864163 | AU165795 | CI425692 | AV926773 | BJ464318 |
| EB125022 | CN864163 | AU165795 | CI435765 | AV926773 | BJ464955 |
| EB125092 | EB152950 | AU165795 | CI633053 | AV926773 | BJ465379 |
| EB125095 | CN864163 | AU165795 | CI650012 | AV926773 | BJ468750 |
| EB125118 | EB113729 | AU165795 | CI654948 | AV926773 | BJ468758 |
| EB125311 | EB124140 | AU165795 | CI665571 | AV926773 | BJ468773 |
| EB125383 | EB152950 | AU165795 | CI665685 | AV926773 | BJ468784 |
| EB125415 | EB146972 | AU165795 | D15423   | AV926773 | BJ468826 |
| EB125568 | EB116003 | AU173480 | CA754482 | AV926773 | BJ468841 |
| EB125568 | EB130265 | AU174294 | CI062148 | AV926773 | BJ468846 |
| EB125617 | CN864163 | AU181814 | AU182645 | AV926773 | BJ468869 |
| EB125635 | EB125192 | AU181814 | CI553792 | AV926773 | BJ468885 |
| EB125657 | CN864163 | AU182163 | CI549969 | AV926773 | BJ472101 |
| EB125714 | CN864163 | C20213   | CI655837 | AV926947 | AV930401 |
| EB125717 | CN864163 | C22396   | CB651057 | AV926954 | AV912778 |
| EB125718 | EB125131 | C24786   | CI655837 | AV926954 | AV918039 |
| EB125718 | EB126965 | C24988   | CI688453 | AV926954 | AV922516 |
| EB125718 | EB128985 | C27650   | CI724436 | AV926954 | AV925354 |
| EB125718 | EB141220 | C98901   | CI226575 | AV926954 | AV926072 |
| EB125719 | EB114812 | C98901   | CI351165 | AV926954 | AV926580 |
| EB125719 | EB114843 | C98901   | CI443747 | AV926954 | AV926588 |
| EB125770 | CN864163 | C98901   | CI557208 | AV926954 | AV927204 |
| EB125828 | CN864163 | CA755094 | CI639773 | AV926954 | AV927424 |
| EB125842 | EG631304 | CB636809 | CI279846 | AV926954 | AV927509 |
| EB125853 | EG631304 | CB636872 | CB678116 | AV926954 | AV927946 |
| EB125905 | EG631304 | CB636872 | CI498457 | AV926954 | AV928230 |
| EB125969 | EG631304 | CB637345 | CI388534 | AV926954 | AV928231 |
| EB125977 | EG631304 | CB637527 | CI244823 | AV926954 | AV928600 |
| EB126065 | EG631304 | CB639041 | CB636235 | AV926954 | AV929988 |
| EB126134 | EG631304 | CB639968 | CI279846 | AV926954 | AV934991 |
| EB126164 | EG631304 | CB644998 | CB670639 | AV926954 | AV936594 |
| EB126304 | EG631304 | CB645338 | CI301097 | AV926954 | AV936602 |
| EB126362 | CN864163 | CB648367 | CB661266 | AV926954 | AV936753 |
| EB126365 | EB119037 | CB648367 | CB664822 | AV926954 | BJ463004 |
| EB126415 | EB145122 | CB648521 | CI268108 | AV926954 | BJ467366 |

|          |          |          |          |          |          |
|----------|----------|----------|----------|----------|----------|
| EB126422 | CN864163 | CB648808 | CB665927 | AV926954 | BJ469315 |
| EB126476 | EB109842 | CB651244 | CI065587 | AV926954 | BJ470008 |
| EB126476 | EB135409 | CB651244 | CI110715 | AV926954 | BJ471503 |
| EB126490 | EB106753 | CB653652 | CI718722 | AV926954 | BJ472362 |
| EB126550 | CN864163 | CB653652 | CI725373 | AV926954 | BJ474631 |
| EB126565 | EB106104 | CB653652 | CI725408 | AV926954 | BJ475816 |
| EB126603 | EB150078 | CB655050 | CB654574 | AV926954 | BJ475959 |
| EB126673 | EB120350 | CB655447 | CB651446 | AV926954 | BJ476003 |
| EB126673 | EB150692 | CB656222 | CB641937 | AV926954 | BJ477113 |
| EB126677 | CN937708 | CB656222 | CB642175 | AV926954 | BJ477142 |
| EB126677 | EB105920 | CB656308 | CI258960 | AV926954 | BJ477272 |
| EB126677 | EB106538 | CB656763 | CI209173 | AV926956 | AV930401 |
| EB126677 | EB106742 | CB657524 | CB647325 | AV927184 | AV930401 |
| EB126677 | EB119607 | CB657657 | CB678781 | AV927203 | AV927202 |
| EB126677 | EB127575 | CB659037 | CB644719 | AV927203 | AV927924 |
| EB126677 | EB127665 | CB659082 | CI601826 | AV927203 | AV928352 |
| EB126677 | EB128115 | CB659569 | CB661425 | AV927203 | AV928957 |
| EB126677 | EB129090 | CB659948 | CB640273 | AV927203 | AV929500 |
| EB126677 | EB129241 | CB660976 | CI327463 | AV927203 | AV930737 |
| EB126677 | EB129266 | CB661498 | CB656329 | AV927203 | AV931515 |
| EB126677 | EB129896 | CB662162 | CB642885 | AV927203 | AV932491 |
| EB126677 | EB130157 | CB662162 | CB658690 | AV927203 | AV932555 |
| EB126677 | EB130247 | CB662162 | CB661266 | AV927203 | AV932793 |
| EB126677 | EB130339 | CB662425 | D16071   | AV927203 | AV933703 |
| EB126677 | EB130500 | CB663188 | CB649914 | AV927203 | AV933898 |
| EB126677 | EB131262 | CB663188 | CB653078 | AV927203 | AV934660 |
| EB126677 | EB131352 | CB663188 | CB664263 | AV927203 | AV934662 |
| EB126677 | EB131355 | CB663188 | CB667632 | AV927203 | AV934761 |
| EB126677 | EB131517 | CB663188 | CB681303 | AV927203 | AV934857 |
| EB126677 | EB131828 | CB663188 | CI112966 | AV927203 | AV934924 |
| EB126677 | EB132057 | CB663188 | CI356078 | AV927203 | AV934928 |
| EB126677 | EB157263 | CB663188 | CI492549 | AV927203 | AV934993 |
| EB126803 | EB137843 | CB663188 | CI508875 | AV927203 | AV935155 |
| EB126930 | CN864163 | CB663188 | CI510146 | AV927203 | AV935188 |
| EB127142 | CN864163 | CB663188 | CI512017 | AV927203 | AV935222 |
| EB127234 | EB134714 | CB663188 | CI515097 | AV927203 | AV935304 |
| EB127284 | EB126693 | CB663304 | CI433127 | AV927203 | AV935340 |
| EB127355 | EB135394 | CB663467 | CI144640 | AV927203 | AV935410 |
| EB127429 | EB134372 | CB666013 | CB658249 | AV927203 | AV935435 |
| EB127436 | CN864163 | CB666520 | CB639800 | AV927203 | AV935494 |
| EB127439 | EB110095 | CB666978 | CI578655 | AV927203 | AV935531 |
| EB127439 | EB110395 | CB667596 | CI515589 | AV927203 | AV935539 |
| EB127506 | EB126678 | CB667858 | CI218005 | AV927203 | AV935630 |
| EB127519 | CN864163 | CB667858 | CI247344 | AV927203 | AV935663 |
| EB127532 | EB132738 | CB667942 | AU165706 | AV927203 | AV935738 |
| EB127532 | EB157056 | CB667942 | CB648152 | AV927203 | AV935823 |
| EB127534 | EB119257 | CB667942 | CB652745 | AV927203 | AV935842 |
| EB127559 | EB134174 | CB667942 | CB669456 | AV927203 | AV935879 |
| EB127616 | EB119038 | CB667942 | CB672782 | AV927203 | AV936029 |
| EB127671 | EB128507 | CB667942 | CB675235 | AV927203 | AV936053 |
| EB127671 | EB129627 | CB667942 | CB677050 | AV927203 | AV936074 |
| EB127702 | EB108540 | CB667942 | CI050131 | AV927203 | AV936084 |



|          |          |          |          |          |          |
|----------|----------|----------|----------|----------|----------|
| EB127702 | EB108702 | CB667942 | CI057734 | AV927203 | AV936113 |
| EB127851 | EB137842 | CB669009 | CI208708 | AV927203 | AV936136 |
| EB127928 | CN864163 | CB669510 | CB668438 | AV927203 | AV936211 |
| EB128176 | EB123403 | CB669620 | CI307843 | AV927203 | AV936220 |
| EB128214 | EB133754 | CB670285 | CI307843 | AV927203 | AV936345 |
| EB128235 | CN864163 | CB670290 | CI418054 | AV927203 | AV936411 |
| EB128254 | EB119037 | CB671287 | CI357741 | AV927203 | AV936418 |
| EB128296 | EB132386 | CB672401 | CI307843 | AV927203 | AV936448 |
| EB128391 | CN904291 | CB674256 | CI307843 | AV927203 | AV936453 |
| EB128398 | EB128271 | CB675366 | CB658111 | AV927203 | AV936688 |
| EB128409 | CN904291 | CB675558 | CB652294 | AV927203 | AV936689 |
| EB128461 | CN864163 | CB676470 | CI642830 | AV927203 | AV936747 |
| EB128479 | EB133754 | CB676957 | CI010937 | AV927203 | AV936751 |
| EB128488 | EB132386 | CB677301 | CB654574 | AV927203 | AV936757 |
| EB128489 | EB152950 | CB678939 | CB649130 | AV927203 | AV936763 |
| EB128554 | EB145393 | CB679929 | AU173980 | AV927203 | AV936774 |
| EB128582 | CN904291 | CB679929 | CI029678 | AV927203 | AV936797 |
| EB128627 | CN879352 | CB679929 | CI031069 | AV927203 | AV936939 |
| EB128647 | EB106570 | CB679929 | CI034234 | AV927203 | AV936962 |
| EB128647 | EB107179 | CB679929 | CI037475 | AV927203 | AV937019 |
| EB128647 | EB107194 | CB679929 | CI037860 | AV927203 | AV937064 |
| EB128647 | EB109510 | CB680515 | CB685632 | AV927203 | AV937076 |
| EB128647 | EB110142 | CB681968 | CI515282 | AV927203 | AV937209 |
| EB128647 | EB114693 | CB683335 | CI483264 | AV927203 | BJ469485 |
| EB128647 | EB114694 | CB683640 | CI584861 | AV927203 | BJ470208 |
| EB128647 | EB114816 | CB683748 | CI181229 | AV927203 | BJ470912 |
| EB128647 | EB114915 | CB683748 | CI360915 | AV927203 | BJ471598 |
| EB128647 | EB115275 | CB684209 | CI642830 | AV927203 | BJ472797 |
| EB128647 | EB117165 | CB684718 | CB672308 | AV927203 | BJ473492 |
| EB128647 | EB119023 | CB684922 | CI769192 | AV927203 | BJ473511 |
| EB128647 | EB119054 | CB685879 | CB645906 | AV927203 | BJ473566 |
| EB128647 | EB119066 | CI000285 | CI483264 | AV927203 | BJ473732 |
| EB128647 | EB119098 | CI001037 | CI010836 | AV927203 | BJ473798 |
| EB128647 | EB119428 | CI001037 | CI029881 | AV927203 | BJ473908 |
| EB128647 | EB119761 | CI001037 | CI217012 | AV927203 | BJ474094 |
| EB128647 | EB119769 | CI002867 | CB685536 | AV927203 | BJ474123 |
| EB128647 | EB119897 | CI004414 | CI278381 | AV927203 | BJ474193 |
| EB128647 | EB120481 | CI004749 | AU161635 | AV927203 | BJ474205 |
| EB128647 | EB121001 | CI004749 | AU223379 | AV927203 | BJ474270 |
| EB128647 | EB121323 | CI004749 | CI004369 | AV927203 | BJ474334 |
| EB128647 | EB122067 | CI004749 | CI007807 | AV927203 | BJ474377 |
| EB128647 | EB122625 | CI004749 | CI008061 | AV927203 | BJ474409 |
| EB128647 | EB123449 | CI004749 | CI008594 | AV927203 | BJ474424 |
| EB128647 | EB123747 | CI004749 | CI008768 | AV927203 | BJ474578 |
| EB128647 | EB123945 | CI004749 | CI008838 | AV927203 | BJ474671 |
| EB128647 | EB124109 | CI004749 | CI010035 | AV927203 | BJ474736 |
| EB128647 | EB124152 | CI004749 | CI010227 | AV927203 | BJ474738 |
| EB128647 | EB124209 | CI004749 | CI010561 | AV927203 | BJ474772 |
| EB128647 | EB124220 | CI004749 | CI011011 | AV927203 | BJ474777 |
| EB128647 | EB124282 | CI004749 | CI011088 | AV927203 | BJ474994 |
| EB128647 | EB124322 | CI004749 | CI011735 | AV927203 | BJ474995 |
| EB128647 | EB124453 | CI004749 | CI012786 | AV927203 | BJ475061 |

|          |          |          |          |          |          |
|----------|----------|----------|----------|----------|----------|
| EB128647 | EB124777 | CI004749 | CI013555 | AV927203 | BJ475152 |
| EB128647 | EB124789 | CI004749 | CI013564 | AV927203 | BJ475188 |
| EB128647 | EB124885 | CI004749 | CI014611 | AV927203 | BJ475234 |
| EB128647 | EB124954 | CI004749 | CI014671 | AV927203 | BJ475328 |
| EB128647 | EB124957 | CI004749 | CI015132 | AV927203 | BJ475362 |
| EB128647 | EB124997 | CI004749 | CI015241 | AV927203 | BJ475374 |
| EB128647 | EB125241 | CI004749 | CI015932 | AV927203 | BJ475377 |
| EB128647 | EB125242 | CI004749 | CI016281 | AV927203 | BJ475396 |
| EB128647 | EB125290 | CI004749 | CI024197 | AV927203 | BJ475398 |
| EB128647 | EB125538 | CI004749 | CI027324 | AV927203 | BJ475491 |
| EB128647 | EB125584 | CI004749 | CI030752 | AV927203 | BJ475560 |
| EB128647 | EB125638 | CI004749 | CI030951 | AV927203 | BJ475615 |
| EB128647 | EB125681 | CI004749 | CI036242 | AV927203 | BJ475699 |
| EB128647 | EB125730 | CI004749 | CI036692 | AV927203 | BJ475968 |
| EB128647 | EB126463 | CI004749 | CI037530 | AV927203 | BJ475988 |
| EB128647 | EB126679 | CI004749 | CI038840 | AV927203 | BJ476013 |
| EB128647 | EB126745 | CI004749 | CI039223 | AV927203 | BJ476099 |
| EB128647 | EB126749 | CI004749 | CI039437 | AV927203 | BJ476123 |
| EB128647 | EB126832 | CI005986 | CI054499 | AV927203 | BJ476125 |
| EB128647 | EB126964 | CI006241 | CI255235 | AV927203 | BJ476133 |
| EB128647 | EB127171 | CI007130 | CI070092 | AV927203 | BJ476236 |
| EB128647 | EB127180 | CI010072 | CI010477 | AV927203 | BJ476265 |
| EB128647 | EB127540 | CI010072 | CI533401 | AV927203 | BJ476319 |
| EB128647 | EB127645 | CI010439 | CI483264 | AV927203 | BJ476481 |
| EB128647 | EB127667 | CI013039 | CB677456 | AV927203 | BJ476557 |
| EB128647 | EB127706 | CI013776 | CI422095 | AV927203 | BJ476763 |
| EB128647 | EB128101 | CI018112 | CB676177 | AV927203 | BJ476815 |
| EB128647 | EB128324 | CI018271 | CI136861 | AV927203 | BJ476894 |
| EB128647 | EB129253 | CI018379 | AU166591 | AV927203 | BJ476959 |
| EB128647 | EB129546 | CI018379 | CI110994 | AV927203 | BJ476963 |
| EB128647 | EB129611 | CI018379 | CI111853 | AV927203 | BJ477027 |
| EB128647 | EB129615 | CI018379 | CI360915 | AV927203 | BJ477237 |
| EB128647 | EB129667 | CI020940 | CI037282 | AV927203 | BJ477314 |
| EB128647 | EB129743 | CI021286 | CI192830 | AV927203 | BJ477400 |
| EB128647 | EB129745 | CI021865 | CI276368 | AV927203 | BJ477412 |
| EB128647 | EB130008 | CI023110 | CB655827 | AV927203 | BJ477450 |
| EB128647 | EB130704 | CI023148 | CI054499 | AV927203 | BJ477490 |
| EB128647 | EB130922 | CI024504 | CI717651 | AV927203 | BJ477495 |
| EB128647 | EB131270 | CI025570 | CI085936 | AV927203 | BJ477532 |
| EB128647 | EB131893 | CI025582 | AU095534 | AV927203 | BJ477533 |
| EB128647 | EB132044 | CI026046 | CI253932 | AV927203 | BY859113 |
| EB128647 | EB132234 | CI026463 | AU057023 | AV927267 | AV917550 |
| EB128647 | EB132532 | CI026463 | CB683582 | AV927279 | AV928216 |
| EB128647 | EB132604 | CI026463 | CI026171 | AV927279 | BJ468488 |
| EB128647 | EB133164 | CI026463 | CI032562 | AV927321 | AV927019 |
| EB128647 | EB133172 | CI026463 | CI038180 | AV927321 | AV930401 |
| EB128647 | EB133247 | CI026544 | CI552056 | AV927381 | AV928584 |
| EB128647 | EB133790 | CI026906 | C27822   | AV927487 | AV917253 |
| EB128647 | EB133861 | CI026918 | CI039267 | AV927487 | AV921228 |
| EB128647 | EB133921 | CI027143 | CI552056 | AV927487 | AV931397 |
| EB128647 | EB134137 | CI027387 | CI515282 | AV927497 | AV925248 |
| EB128647 | EB134326 | CI028098 | CI208708 | AV927497 | AV927019 |

|          |          |          |          |          |          |
|----------|----------|----------|----------|----------|----------|
| EB128647 | EB134641 | CI028537 | CB664316 | AV927497 | AV930401 |
| EB128647 | EB134871 | CI028537 | CI033511 | AV927532 | AV930182 |
| EB128647 | EB135454 | CI028537 | CI039103 | AV927627 | AV929075 |
| EB128647 | EB136121 | CI028537 | CI052938 | AV927627 | AV930981 |
| EB128647 | EB138320 | CI028537 | CI139800 | AV927753 | BJ472784 |
| EB128647 | EB141358 | CI028537 | CI209304 | AV927777 | AV927419 |
| EB128647 | EB143313 | CI028537 | CI226360 | AV927817 | AV917253 |
| EB128647 | EB146404 | CI028537 | CI332686 | AV927817 | AV921228 |
| EB128647 | EB149397 | CI028537 | CI360770 | AV927817 | AV931397 |
| EB128647 | EB175445 | CI028537 | CI493385 | AV927850 | AV928216 |
| EB128647 | EB175742 | CI028537 | CI541579 | AV927850 | BJ468488 |
| EB128647 | EB175777 | CI029841 | CI518144 | AV927953 | AV927019 |
| EB128647 | EB176063 | CI030190 | CI010477 | AV927953 | AV930401 |
| EB128647 | EB176138 | CI030190 | CI533401 | AV928020 | AV930401 |
| EB128647 | EB176186 | CI030412 | CI219096 | AV928116 | AV927419 |
| EB128647 | EB176203 | CI030584 | CI549969 | AV928122 | AV925248 |
| EB128647 | EB176246 | CI030584 | CI724436 | AV928122 | AV927019 |
| EB128647 | EB176389 | CI033110 | CI215108 | AV928122 | AV930401 |
| EB128647 | EB176408 | CI033338 | CI024943 | AV928166 | BJ468396 |
| EB128647 | EB176517 | CI033338 | CI033452 | AV928210 | AV912816 |
| EB128647 | EB176801 | CI033338 | CI298085 | AV928265 | AV928081 |
| EB128647 | EB176837 | CI033338 | CI298167 | AV928633 | AV931433 |
| EB128647 | EB176911 | CI033338 | CI734541 | AV928808 | BJ472784 |
| EB128647 | EB177068 | CI033338 | D49136   | AV928866 | AV914972 |
| EB128647 | EB177070 | CI034971 | CI073897 | AV928866 | AV915573 |
| EB128647 | EB177118 | CI035787 | CB647062 | AV928866 | AV915619 |
| EB128647 | EB177133 | CI037507 | CI678389 | AV928866 | AV916359 |
| EB128647 | EB177265 | CI041156 | CB649914 | AV928866 | AV920675 |
| EB128647 | EB177506 | CI041156 | CB653078 | AV928866 | AV925447 |
| EB128647 | EB177527 | CI041156 | CB664263 | AV928866 | BJ463223 |
| EB128647 | EB177583 | CI041156 | CB667632 | AV928890 | AV914445 |
| EB128647 | EB177651 | CI041156 | CB669454 | AV929128 | AV923892 |
| EB128647 | EB177679 | CI041156 | CB681303 | AV929187 | AV923608 |
| EB128647 | EB177876 | CI041156 | CI112966 | AV929187 | AV923609 |
| EB128647 | EB177942 | CI041156 | CI356078 | AV929187 | AV927287 |
| EB128647 | EB177973 | CI041156 | CI492549 | AV929187 | AV927961 |
| EB128647 | EB177991 | CI041156 | CI508875 | AV929187 | AV928055 |
| EB128664 | EB126786 | CI041156 | CI510146 | AV929187 | AV928056 |
| EB128680 | EB109895 | CI041156 | CI512017 | AV929187 | AV929914 |
| EB128685 | EB152950 | CI041156 | CI515097 | AV929187 | AV931084 |
| EB128702 | CN871131 | CI041638 | AU078674 | AV929187 | AV931659 |
| EB128748 | EB128974 | CI042850 | CB658781 | AV929187 | AV934583 |
| EB128748 | EB157365 | CI042850 | CI383914 | AV929187 | AV934795 |
| EB128758 | CN939004 | CI042965 | CI160150 | AV929187 | AV935017 |
| EB128761 | EB133610 | CI042965 | CI161012 | AV929187 | AV937141 |
| EB128799 | EB107245 | CI042965 | CI161439 | AV929187 | AV937205 |
| EB128803 | CN878374 | CI042965 | CI196901 | AV929187 | BJ547679 |
| EB128822 | EB124203 | CI042965 | CI198423 | AV929187 | BJ548746 |
| EB128822 | EB129603 | CI042965 | CI228516 | AV929187 | BJ549451 |
| EB128822 | EB130868 | CI042965 | CI229256 | AV929187 | BJ549492 |
| EB128822 | EB137878 | CI043366 | CB650453 | AV929187 | BJ549971 |
| EB128840 | EB106409 | CI044342 | CB685137 | AV929198 | AV923608 |

|          |          |          |          |          |          |
|----------|----------|----------|----------|----------|----------|
| EB128840 | EB106565 | CI044807 | CI515090 | AV929198 | AV928056 |
| EB128840 | EB128495 | CI044807 | CI516103 | AV929198 | AV931659 |
| EB128840 | EB131444 | CI044981 | CI055204 | AV929198 | AV934583 |
| EB128840 | EB132429 | CI044981 | CI061070 | AV929198 | AV937205 |
| EB128840 | EB132853 | CI044981 | CI074888 | AV929198 | BJ548746 |
| EB128840 | EB136473 | CI044981 | CI111771 | AV929198 | BJ549451 |
| EB128840 | EB146504 | CI044981 | CI371995 | AV929198 | BJ549971 |
| EB128840 | EB148028 | CI044998 | CI066075 | AV929199 | AV923608 |
| EB128949 | CN945174 | CI044998 | CI076891 | AV929199 | AV928056 |
| EB128949 | EB105884 | CI044998 | CI177629 | AV929199 | AV934583 |
| EB128949 | EB117625 | CI045987 | CI125117 | AV929199 | AV935017 |
| EB128949 | EB126870 | CI051600 | CI120535 | AV929199 | BJ547679 |
| EB128949 | EB128657 | CI051600 | CI160372 | AV929199 | BJ548081 |
| EB128949 | EB128699 | CI051600 | CI160438 | AV929199 | BJ548933 |
| EB128949 | EB128769 | CI051600 | CI160870 | AV929199 | BJ549451 |
| EB128949 | EB129453 | CI051600 | CI271437 | AV929234 | AV921331 |
| EB128949 | EB129467 | CI051600 | CI351352 | AV929304 | AV917929 |
| EB128949 | EB129760 | CI051848 | CB670751 | AV929304 | BJ465370 |
| EB128949 | EB129918 | CI051848 | CI041277 | AV929405 | AV930135 |
| EB128949 | EB129942 | CI051848 | CI047555 | AV929411 | AV927019 |
| EB128949 | EB131304 | CI051848 | CI305806 | AV929411 | AV930401 |
| EB128949 | EB131684 | CI051971 | CI144309 | AV929420 | AV930401 |
| EB128949 | EB132853 | CI051971 | CI256782 | AV929438 | AV925248 |
| EB128949 | EB133475 | CI052054 | CB650646 | AV929438 | AV927019 |
| EB128949 | EB134919 | CI052104 | CI167579 | AV929438 | AV930401 |
| EB128949 | EB136909 | CI052680 | CI294788 | AV929454 | AV912771 |
| EB128949 | EB136949 | CI054129 | CI483264 | AV929454 | AV924120 |
| EB128949 | EB137383 | CI054934 | CI029137 | AV929454 | AV924960 |
| EB128949 | EB137858 | CI054934 | CI033457 | AV929454 | AV925885 |
| EB128949 | EB144800 | CI054934 | CI037265 | AV929454 | AV926001 |
| EB128949 | EB144856 | CI054934 | CI038371 | AV929454 | AV927084 |
| EB128949 | EB144860 | CI054934 | CI055990 | AV929454 | AV927325 |
| EB128949 | EB144880 | CI054934 | CI165904 | AV929454 | AV928438 |
| EB128949 | EB145713 | CI054934 | CI254848 | AV929454 | AV928545 |
| EB128949 | EB146017 | CI054934 | CI442646 | AV929454 | AV928784 |
| EB128949 | EB146270 | CI054934 | CI457191 | AV929454 | AV928792 |
| EB128949 | EB148043 | CI055195 | CI483264 | AV929454 | AV929215 |
| EB128949 | EB150061 | CI056520 | CI359578 | AV929454 | AV933170 |
| EB128965 | CN864163 | CI056534 | CI001231 | AV929454 | AV933846 |
| EB128999 | CN904291 | CI056642 | AU057024 | AV929454 | AV933871 |
| EB129057 | CN869277 | CI056777 | CI208874 | AV929454 | AV934411 |
| EB129191 | EB152950 | CI057115 | CI057228 | AV929454 | AV934665 |
| EB129196 | EB141399 | CI057117 | CB657766 | AV929454 | AV935747 |
| EB129290 | CN864163 | CI057117 | CI004879 | AV929454 | AV937039 |
| EB129296 | EB108161 | CI057117 | CI010155 | AV929454 | AV937049 |
| EB129373 | EB147105 | CI057117 | CI043603 | AV929454 | BJ468970 |
| EB129379 | EB152950 | CI057117 | CI047037 | AV929454 | BJ469421 |
| EB129488 | CN864163 | CI057117 | CI048344 | AV929454 | BJ469668 |
| EB129529 | CN864163 | CI057117 | CI056371 | AV929454 | BJ469879 |
| EB129575 | EE663776 | CI057117 | CI057530 | AV929454 | BJ470853 |
| EB129592 | EE663776 | CI057117 | CI086540 | AV929454 | BJ471419 |
| EB129659 | EB144300 | CI057117 | CI167332 | AV929454 | BJ472105 |

|          |          |          |          |          |          |
|----------|----------|----------|----------|----------|----------|
| EB129684 | EB132732 | CI057117 | CI175491 | AV929454 | BJ472167 |
| EB129701 | EB125192 | CI057117 | CI187411 | AV929454 | BJ472704 |
| EB129703 | EB128271 | CI057117 | CI217159 | AV929454 | BJ473216 |
| EB129790 | EB132521 | CI057117 | CI257490 | AV929454 | BJ473481 |
| EB129790 | EB177511 | CI057117 | CI263553 | AV929454 | BJ473525 |
| EB129833 | EB152950 | CI057117 | CI266093 | AV929454 | BJ473529 |
| EB129843 | CN864163 | CI057117 | CI353492 | AV929454 | BJ473558 |
| EB129900 | EB152950 | CI057117 | CI366843 | AV929454 | BJ474017 |
| EB129913 | EB133754 | CI057310 | CB645425 | AV929454 | BJ475040 |
| EB130011 | CN948103 | CI057310 | CB671764 | AV929454 | BJ476103 |
| EB130033 | CN904291 | CI057310 | CI029391 | AV929454 | BJ476562 |
| EB130057 | EB145150 | CI057310 | CI056443 | AV929454 | BJ477041 |
| EB130101 | EB120946 | CI057310 | CI349625 | AV929454 | BJ477052 |
| EB130140 | EB133754 | CI058365 | CI058899 | AV929454 | BJ477278 |
| EB130150 | EB110277 | CI058365 | CI063554 | AV929549 | AV930218 |
| EB130212 | EB105948 | CI058365 | CI206855 | AV929582 | AV923122 |
| EB130212 | EB106619 | CI058365 | CI243101 | AV929582 | AV923648 |
| EB130212 | EB107065 | CI058365 | CI284170 | AV929582 | AV926151 |
| EB130212 | EB107421 | CI058365 | CI505728 | AV929582 | AV927223 |
| EB130212 | EB108830 | CI058401 | CI213711 | AV929582 | AV930987 |
| EB130212 | EB108933 | CI058401 | CI281497 | AV929646 | BY844533 |
| EB130212 | EB109494 | CI058401 | CI719233 | AV929646 | BY844634 |
| EB130212 | EB110142 | CI058417 | CI057408 | AV929646 | BY844935 |
| EB130212 | EB114694 | CI058417 | CI759793 | AV929646 | BY845131 |
| EB130212 | EB115275 | CI058866 | CI312035 | AV929646 | BY845539 |
| EB130212 | EB115339 | CI059026 | CI053297 | AV929646 | BY845670 |
| EB130212 | EB117659 | CI059026 | CI057408 | AV929646 | BY846121 |
| EB130212 | EB117920 | CI059026 | CI174378 | AV929646 | BY846306 |
| EB130212 | EB118977 | CI059026 | CI764942 | AV929646 | BY847281 |
| EB130212 | EB119089 | CI059696 | AU064086 | AV929646 | BY847633 |
| EB130212 | EB119277 | CI059696 | AU064383 | AV929848 | BJ468613 |
| EB130212 | EB119761 | CI059696 | AU077692 | AV929906 | AV920597 |
| EB130212 | EB119767 | CI059696 | CI048315 | AV930020 | AV921206 |
| EB130212 | EB119846 | CI059696 | CI061610 | AV930020 | AV923397 |
| EB130212 | EB120074 | CI059696 | CI213299 | AV930020 | AV924411 |
| EB130212 | EB120112 | CI059696 | CI222733 | AV930020 | AV929809 |
| EB130212 | EB120190 | CI059696 | CI239143 | AV930020 | AV931802 |
| EB130212 | EB121955 | CI059696 | CI240872 | AV930020 | AV934914 |
| EB130212 | EB122596 | CI059696 | CI716564 | AV930020 | AV935210 |
| EB130212 | EB123179 | CI059960 | CI063228 | AV930020 | AV935642 |
| EB130212 | EB123945 | CI059960 | CI064571 | AV930020 | AV936270 |
| EB130212 | EB124065 | CI060315 | CI164170 | AV930020 | BJ547285 |
| EB130212 | EB124109 | CI060315 | CI189134 | AV930020 | BJ548066 |
| EB130212 | EB124152 | CI060315 | CI199647 | AV930020 | BJ548168 |
| EB130212 | EB124441 | CI060315 | CI210263 | AV930020 | BJ548216 |
| EB130212 | EB124871 | CI060315 | CI284767 | AV930020 | BJ548264 |
| EB130212 | EB124954 | CI060441 | CI062335 | AV930020 | BJ548397 |
| EB130212 | EB125238 | CI060508 | CI054532 | AV930020 | BJ548408 |
| EB130212 | EB125290 | CI060508 | CI058531 | AV930020 | BJ548488 |
| EB130212 | EB125349 | CI060508 | CI058867 | AV930020 | BJ548766 |
| EB130212 | EB125396 | CI060508 | CI059498 | AV930020 | BJ548813 |
| EB130212 | EB125429 | CI060508 | CI063401 | AV930020 | BJ548983 |

|          |          |          |          |          |          |
|----------|----------|----------|----------|----------|----------|
| EB130212 | EB125730 | CI060508 | CI070593 | AV930041 | BJ471504 |
| EB130212 | EB126472 | CI060508 | CI169432 | AV930041 | BJ472784 |
| EB130212 | EB126474 | CI060508 | CI169719 | AV930054 | AV930737 |
| EB130212 | EB126635 | CI060508 | CI405492 | AV930054 | AV934406 |
| EB130212 | EB126749 | CI060642 | CI049270 | AV930054 | AV934655 |
| EB130212 | EB127215 | CI060642 | CI063493 | AV930054 | AV934681 |
| EB130212 | EB127264 | CI060642 | CI063616 | AV930054 | AV935353 |
| EB130212 | EB127318 | CI060642 | CI183982 | AV930054 | AV935371 |
| EB130212 | EB127540 | CI060642 | CI253779 | AV930054 | AV935532 |
| EB130212 | EB127645 | CI060642 | CI284421 | AV930054 | AV935538 |
| EB130212 | EB127708 | CI060867 | CI058589 | AV930054 | AV936121 |
| EB130212 | EB128101 | CI060879 | CI060863 | AV930054 | AV936122 |
| EB130212 | EB128119 | CI060879 | CI061195 | AV930054 | AV936140 |
| EB130212 | EB128324 | CI060879 | CI267415 | AV930054 | AV936489 |
| EB130212 | EB129402 | CI061067 | CB678781 | AV930054 | AV936747 |
| EB130212 | EB130008 | CI061592 | CI369527 | AV930054 | AV937019 |
| EB130212 | EB130267 | CI061886 | AU094789 | AV930054 | BJ471598 |
| EB130212 | EB130693 | CI062275 | CI020963 | AV930054 | BJ472797 |
| EB130212 | EB130697 | CI062336 | CI707220 | AV930054 | BJ473908 |
| EB130212 | EB130704 | CI062687 | AU092633 | AV930054 | BJ474083 |
| EB130212 | EB130890 | CI062687 | CI018610 | AV930054 | BJ474547 |
| EB130212 | EB131132 | CI062687 | CI024644 | AV930054 | BJ474736 |
| EB130212 | EB131270 | CI062687 | CI025895 | AV930054 | BJ475531 |
| EB130212 | EB131298 | CI062687 | CI028212 | AV930054 | BJ475902 |
| EB130212 | EB131319 | CI062687 | CI035760 | AV930054 | BJ476099 |
| EB130212 | EB131328 | CI062687 | CI054490 | AV930054 | BJ476445 |
| EB130212 | EB131680 | CI062687 | CI055079 | AV930054 | BJ476481 |
| EB130212 | EB131787 | CI062687 | CI058222 | AV930054 | BJ477412 |
| EB130212 | EB131809 | CI062687 | CI059252 | AV930054 | BJ477450 |
| EB130212 | EB132046 | CI062687 | CI059492 | AV930054 | BJ477490 |
| EB130212 | EB132174 | CI062687 | CI059692 | AV930054 | BJ477532 |
| EB130212 | EB132231 | CI062687 | CI060594 | AV930117 | AV930401 |
| EB130212 | EB132275 | CI062687 | CI060920 | AV930133 | AV919492 |
| EB130212 | EB132532 | CI062687 | CI061111 | AV930174 | AV920564 |
| EB130212 | EB133267 | CI062687 | CI061498 | AV930219 | BY848544 |
| EB130212 | EB134133 | CI062687 | CI063779 | AV930267 | BJ547742 |
| EB130212 | EB134195 | CI062687 | CI063801 | AV930267 | BJ548055 |
| EB130212 | EB134326 | CI062687 | CI063826 | AV930267 | BJ548469 |
| EB130212 | EB135454 | CI062687 | CI090177 | AV930267 | BJ548725 |
| EB130212 | EB136058 | CI062687 | CI105240 | AV930268 | AV935291 |
| EB130212 | EB138112 | CI062687 | CI148691 | AV930268 | BJ547484 |
| EB130212 | EB138343 | CI062687 | CI169909 | AV930268 | BJ547640 |
| EB130212 | EB142770 | CI062687 | CI171527 | AV930268 | BJ547644 |
| EB130212 | EB148381 | CI062687 | CI171820 | AV930268 | BJ547670 |
| EB130212 | EB156973 | CI062687 | CI172320 | AV930268 | BJ548270 |
| EB130212 | EB175320 | CI062687 | CI173737 | AV930268 | BJ548469 |
| EB130212 | EB175328 | CI062687 | CI205488 | AV930268 | BJ548535 |
| EB130212 | EB175344 | CI062687 | CI210264 | AV930268 | BJ548717 |
| EB130212 | EB175361 | CI062687 | CI210407 | AV930268 | BJ549044 |
| EB130212 | EB175448 | CI062687 | CI210482 | AV930302 | AV927019 |
| EB130212 | EB175665 | CI062687 | CI212053 | AV930302 | AV930401 |
| EB130212 | EB175861 | CI062687 | CI236789 | AV930423 | AV927019 |

|          |          |          |          |          |          |
|----------|----------|----------|----------|----------|----------|
| EB130212 | EB176157 | CI062687 | CI238573 | AV930423 | AV930401 |
| EB130212 | EB176203 | CI062687 | CI239572 | AV930542 | AV930182 |
| EB130212 | EB176246 | CI062687 | CI253477 | AV930606 | BY876611 |
| EB130212 | EB176408 | CI062687 | CI254781 | AV930678 | AV916372 |
| EB130212 | EB176517 | CI062687 | CI254950 | AV930678 | AV921809 |
| EB130212 | EB176518 | CI062687 | CI279851 | AV930747 | AV918743 |
| EB130212 | EB176560 | CI062687 | CI280819 | AV930747 | AV930161 |
| EB130212 | EB176685 | CI062687 | CI281725 | AV930747 | AV930967 |
| EB130212 | EB176801 | CI062687 | CI283746 | AV930747 | AV931975 |
| EB130212 | EB176860 | CI062687 | CI285093 | AV930747 | AV934586 |
| EB130212 | EB176911 | CI062687 | CI412806 | AV930747 | BJ549930 |
| EB130212 | EB177019 | CI062687 | CI426952 | AV930791 | AV912771 |
| EB130212 | EB177065 | CI062687 | CI438555 | AV930791 | AV917505 |
| EB130212 | EB177070 | CI062687 | CI484607 | AV930791 | AV924960 |
| EB130212 | EB177133 | CI062687 | CI489974 | AV930791 | AV925709 |
| EB130212 | EB177285 | CI062687 | CI523383 | AV930791 | AV926518 |
| EB130212 | EB177331 | CI062696 | CI043603 | AV930791 | AV927084 |
| EB130212 | EB177506 | CI062696 | CI065109 | AV930791 | AV928545 |
| EB130212 | EB177527 | CI062696 | CI068829 | AV930791 | AV928667 |
| EB130212 | EB177648 | CI062696 | CI073121 | AV930791 | AV928784 |
| EB130212 | EB177801 | CI062696 | CI075315 | AV930791 | AV928792 |
| EB130212 | EB177815 | CI062696 | CI078230 | AV930791 | AV929215 |
| EB130212 | EB177860 | CI062696 | CI116307 | AV930791 | AV931411 |
| EB130212 | EB177909 | CI062696 | CI180595 | AV930791 | AV931913 |
| EB130212 | EB177942 | CI062696 | CI183839 | AV930791 | AV932386 |
| EB130212 | EB177973 | CI062696 | CI191225 | AV930791 | AV933304 |
| EB130259 | EB123684 | CI062696 | CI205709 | AV930791 | AV933846 |
| EB130410 | EE663776 | CI062696 | CI218653 | AV930791 | AV933871 |
| EB130449 | CN864163 | CI062696 | CI247615 | AV930791 | AV934410 |
| EB130492 | CN931759 | CI062696 | CI248399 | AV930791 | AV934411 |
| EB130523 | EB132923 | CI062696 | CI253185 | AV930791 | AV934665 |
| EB130523 | EB137962 | CI062696 | CI259906 | AV930791 | AV935747 |
| EB130523 | EB146972 | CI062696 | CI274218 | AV930791 | AV936107 |
| EB130549 | EB129359 | CI062696 | CI378744 | AV930791 | AV936410 |
| EB130549 | EB131579 | CI062696 | CI551116 | AV930791 | AV936953 |
| EB130682 | EB152950 | CI062801 | CI059134 | AV930791 | AV937049 |
| EB130727 | CN864163 | CI062801 | CI059752 | AV930791 | AV937250 |
| EB130816 | EB127717 | CI062801 | CI059839 | AV930791 | BJ467300 |
| EB131154 | EB119057 | CI062801 | CI060249 | AV930791 | BJ469310 |
| EB131154 | EB133822 | CI062801 | CI062427 | AV930791 | BJ469589 |
| EB131157 | EB135343 | CI062801 | CI062459 | AV930791 | BJ469668 |
| EB131157 | EB145709 | CI062801 | CI063285 | AV930791 | BJ469879 |
| EB131157 | EB177808 | CI062801 | CI063472 | AV930791 | BJ470107 |
| EB131207 | CN864163 | CI062801 | CI064747 | AV930791 | BJ470853 |
| EB131310 | EB119057 | CI062801 | CI064763 | AV930791 | BJ471419 |
| EB131333 | EB119057 | CI062801 | CI210718 | AV930791 | BJ472105 |
| EB131333 | EB133822 | CI062801 | CI280964 | AV930791 | BJ472167 |
| EB131350 | EB137843 | CI063210 | CI058589 | AV930791 | BJ472704 |
| EB131439 | CN879534 | CI063297 | CI273210 | AV930791 | BJ472881 |
| EB131439 | CN942173 | CI063431 | CI052863 | AV930791 | BJ473216 |
| EB131439 | EB109801 | CI063431 | CI058421 | AV930791 | BJ473394 |
| EB131439 | EB124867 | CI063431 | CI058955 | AV930791 | BJ473481 |

|          |          |          |          |          |          |
|----------|----------|----------|----------|----------|----------|
| EB131439 | EB127227 | CI063431 | CI059028 | AV930791 | BJ473525 |
| EB131439 | EB128245 | CI063431 | CI059130 | AV930791 | BJ473558 |
| EB131439 | EB128543 | CI063431 | CI059597 | AV930791 | BJ473799 |
| EB131439 | EB130884 | CI063431 | CI060981 | AV930791 | BJ474017 |
| EB131439 | EB131246 | CI063431 | CI061011 | AV930791 | BJ474321 |
| EB131439 | EB131284 | CI063431 | CI061519 | AV930791 | BJ475040 |
| EB131439 | EB131842 | CI063431 | CI061737 | AV930791 | BJ476562 |
| EB131439 | EB135408 | CI063431 | CI061995 | AV930791 | BJ476659 |
| EB131439 | EB136342 | CI063431 | CI062007 | AV930791 | BJ477041 |
| EB131439 | EB141724 | CI063431 | CI153668 | AV930791 | BJ477278 |
| EB131629 | EB133754 | CI063431 | CI165720 | AV930825 | AV937113 |
| EB131862 | EB134810 | CI063431 | CI168784 | AV930896 | BJ476764 |
| EB131913 | EB127833 | CI063431 | CI171230 | AV930917 | AV919586 |
| EB131913 | EB127875 | CI063431 | CI171411 | AV930917 | BY843520 |
| EB131921 | EB109801 | CI063431 | CI171453 | AV931255 | AV923892 |
| EB131921 | EB124867 | CI063431 | CI171480 | AV931343 | AV917339 |
| EB131921 | EB131246 | CI063431 | CI187903 | AV931343 | AV917457 |
| EB131921 | EB131842 | CI063431 | CI205319 | AV931343 | AV922788 |
| EB131974 | CN864163 | CI063431 | CI205408 | AV931343 | AV923069 |
| EB132005 | EB133754 | CI063431 | CI213958 | AV931343 | AV923214 |
| EB132095 | EB109315 | CI063431 | CI214876 | AV931343 | AV923271 |
| EB132095 | EB135343 | CI063431 | CI216173 | AV931343 | AV923603 |
| EB132095 | EB138095 | CI063431 | CI216604 | AV931343 | AV924249 |
| EB132095 | EB145709 | CI063431 | CI251595 | AV931343 | AV924598 |
| EB132095 | EB177808 | CI063431 | CI254930 | AV931343 | AV924736 |
| EB132162 | EB124140 | CI063431 | CI262718 | AV931343 | AV924759 |
| EB132162 | EB124489 | CI063431 | CI262983 | AV931343 | AV924958 |
| EB132162 | EB132432 | CI063431 | CI263007 | AV931343 | AV925185 |
| EB132173 | EB131696 | CI063431 | CI263571 | AV931343 | AV925736 |
| EB132363 | EB129010 | CI063431 | CI264625 | AV931343 | AV926157 |
| EB132393 | CN864163 | CI063431 | CI266692 | AV931343 | AV926191 |
| EB132424 | EB143076 | CI063431 | CI266717 | AV931343 | AV926537 |
| EB132424 | EB146358 | CI063431 | CI268119 | AV931343 | AV926781 |
| EB132426 | CN939004 | CI063431 | CI268746 | AV931343 | AV927021 |
| EB132457 | CN864163 | CI063431 | CI281796 | AV931343 | AV927072 |
| EB132464 | EB117503 | CI063431 | CI282959 | AV931343 | AV927893 |
| EB132655 | EB133096 | CI063431 | CI285139 | AV931343 | AV932633 |
| EB132656 | EB134547 | CI063619 | CI245098 | AV931343 | AV933168 |
| EB132663 | CN887761 | CI063917 | CI280886 | AV931343 | AV933480 |
| EB132804 | EB133985 | CI064423 | CI254671 | AV931343 | AV933986 |
| EB132829 | EB126729 | CI064423 | CI255571 | AV931343 | AV934131 |
| EB132837 | CN864163 | CI064694 | CI011891 | AV931343 | AV934207 |
| EB132852 | CN864163 | CI064694 | CI039431 | AV931343 | BJ468839 |
| EB132894 | CN864163 | CI064694 | CI167103 | AV931343 | BJ469392 |
| EB132895 | EB132925 | CI064694 | CI187870 | AV931343 | BJ469541 |
| EB132895 | EB134039 | CI065035 | CI098746 | AV931343 | BJ470975 |
| EB132895 | EB134547 | CI065567 | CI087123 | AV931343 | BJ472299 |
| EB132905 | EB133273 | CI065567 | CI090116 | AV931343 | BJ472309 |
| EB132939 | EB132925 | CI065817 | CI144743 | AV931343 | BJ476926 |
| EB132939 | EB134039 | CI066232 | CI654800 | AV931373 | AV930182 |
| EB132939 | EB134547 | CI066732 | CI338650 | AV931388 | BY876611 |
| EB132978 | EB119547 | CI067914 | CI079448 | AV931436 | AV930401 |



|          |          |          |          |          |          |
|----------|----------|----------|----------|----------|----------|
| EB132978 | EB131486 | CI067914 | CI431590 | AV931543 | AV933334 |
| EB132988 | CN864163 | CI068107 | CB647421 | AV931567 | AV922196 |
| EB132989 | CN904291 | CI068107 | CB654779 | AV931567 | BY866969 |
| EB133019 | EB132685 | CI068107 | CI196305 | AV931567 | BY868033 |
| EB133023 | EB131266 | CI068107 | CI197904 | AV931567 | BY868222 |
| EB133023 | EB145649 | CI068221 | CI041180 | AV931567 | BY871408 |
| EB133023 | EB177306 | CI068221 | CI044155 | AV931726 | BY871745 |
| EB133068 | CN903337 | CI068221 | CI045545 | AV931793 | AV927019 |
| EB133068 | EB145946 | CI068221 | CI051540 | AV931793 | AV930401 |
| EB133157 | EB132925 | CI068221 | CI059837 | AV931836 | AV922192 |
| EB133157 | EB134039 | CI068221 | CI067784 | AV931912 | BY876124 |
| EB133157 | EB134547 | CI068221 | CI070576 | AV931912 | BY876310 |
| EB133193 | EB132685 | CI068221 | CI085514 | AV932045 | BY861274 |
| EB133193 | EB132925 | CI068221 | CI086450 | AV932052 | AV927019 |
| EB133193 | EB134039 | CI068221 | CI091687 | AV932052 | AV930401 |
| EB133193 | EB134547 | CI068221 | CI125247 | AV932127 | AV925248 |
| EB133200 | EB132788 | CI068221 | CI132466 | AV932127 | AV927019 |
| EB133200 | EB132925 | CI068221 | CI144949 | AV932127 | AV930401 |
| EB133200 | EB133629 | CI068221 | CI165873 | AV932148 | AV933034 |
| EB133200 | EB133762 | CI068221 | CI209423 | AV932148 | BJ469322 |
| EB133200 | EB134039 | CI068221 | CI247604 | AV932172 | AV932388 |
| EB133208 | EB132788 | CI069207 | CI202394 | AV932172 | AV934255 |
| EB133208 | EB133629 | CI070966 | CI030217 | AV932206 | AV933574 |
| EB133208 | EB133762 | CI071896 | CA754225 | AV932220 | AV925248 |
| EB133208 | EB134547 | CI072589 | AU082313 | AV932220 | AV927019 |
| EB133210 | CN923730 | CI073629 | CI168009 | AV932220 | AV930401 |
| EB133228 | EB134547 | CI073873 | CI095434 | AV932236 | AV932263 |
| EB133231 | CN921265 | CI073873 | CI530143 | AV932236 | AV934216 |
| EB133231 | CN921569 | CI074691 | CI219355 | AV932236 | AV936473 |
| EB133231 | CN923730 | CI074691 | CI265800 | AV932236 | BJ470741 |
| EB133240 | EB132925 | CI075408 | CI675413 | AV932236 | BJ470756 |
| EB133240 | EB134039 | CI075615 | CI145042 | AV932280 | BJ475566 |
| EB133276 | EB141159 | CI075635 | CI187595 | AV932311 | AV932252 |
| EB133278 | EB110059 | CI078152 | CI262281 | AV932319 | AV936473 |
| EB133298 | EB137666 | CI079580 | CI069975 | AV932319 | BJ470741 |
| EB133298 | EB140966 | CI079580 | CI551121 | AV932319 | BJ470756 |
| EB133298 | EB141159 | CI079679 | CI193946 | AV932320 | AV926577 |
| EB133298 | EB142947 | CI080984 | AU029570 | AV932381 | BJ470999 |
| EB133298 | EB146972 | CI080984 | CB669000 | AV932438 | AV916655 |
| EB133305 | EB134547 | CI080984 | CB674313 | AV932522 | BJ471069 |
| EB133333 | EB132685 | CI080984 | CI040986 | AV932522 | BJ472904 |
| EB133333 | EB132788 | CI080984 | CI041180 | AV932581 | AV925248 |
| EB133333 | EB133629 | CI080984 | CI044155 | AV932581 | AV927019 |
| EB133333 | EB133762 | CI080984 | CI044736 | AV932581 | AV930401 |
| EB133333 | EB134547 | CI080984 | CI045545 | AV932740 | AV930401 |
| EB133409 | CN864163 | CI080984 | CI045641 | AV932770 | AV934370 |
| EB133411 | CN888964 | CI080984 | CI045829 | AV932770 | AV936477 |
| EB133414 | EB132685 | CI080984 | CI046365 | AV932770 | BJ547970 |
| EB133414 | EB132925 | CI080984 | CI046564 | AV932770 | BJ548167 |
| EB133414 | EB134039 | CI080984 | CI048143 | AV932786 | AV913588 |
| EB133414 | EB134547 | CI080984 | CI049804 | AV932786 | AV926880 |
| EB133473 | EB136938 | CI080984 | CI051416 | AV932833 | AV932263 |

|          |          |          |          |          |          |
|----------|----------|----------|----------|----------|----------|
| EB133561 | EB116398 | CI080984 | CI051540 | AV932833 | AV934216 |
| EB133561 | EB116883 | CI080984 | CI059837 | AV932875 | BY845523 |
| EB133561 | EB117066 | CI080984 | CI067784 | AV932903 | AV932225 |
| EB133561 | EB117744 | CI080984 | CI068578 | AV932939 | BJ546909 |
| EB133561 | EB137272 | CI080984 | CI068741 | AV932942 | AV934216 |
| EB133561 | EB138353 | CI080984 | CI070576 | AV932942 | AV936473 |
| EB133561 | EB142651 | CI080984 | CI074759 | AV932943 | AV927019 |
| EB133561 | EB143808 | CI080984 | CI075967 | AV932943 | AV930401 |
| EB133570 | EB133985 | CI080984 | CI077124 | AV933007 | AV927019 |
| EB133604 | EB132685 | CI080984 | CI085514 | AV933007 | AV930401 |
| EB133604 | EB132925 | CI080984 | CI086013 | AV933058 | AV933146 |
| EB133604 | EB134039 | CI080984 | CI086450 | AV933058 | BJ471900 |
| EB133713 | EB132685 | CI080984 | CI086631 | AV933074 | AV934216 |
| EB133752 | EB136938 | CI080984 | CI091687 | AV933074 | AV935105 |
| EB133777 | CN904291 | CI080984 | CI098981 | AV933074 | BJ470741 |
| EB133838 | CN864163 | CI080984 | CI109121 | AV933172 | BJ476764 |
| EB133847 | EB126729 | CI080984 | CI110821 | AV933212 | BJ469200 |
| EB133923 | CN889526 | CI080984 | CI121942 | AV933259 | BJ549953 |
| EB133923 | CN889556 | CI080984 | CI125247 | AV933259 | BY867053 |
| EB133933 | CN864163 | CI080984 | CI129917 | AV933337 | AV935452 |
| EB133972 | EB115817 | CI080984 | CI132466 | AV933344 | BY858018 |
| EB133972 | EB116030 | CI080984 | CI152118 | AV933395 | AV933765 |
| EB133972 | EB116386 | CI080984 | CI165873 | AV933398 | AV933105 |
| EB133972 | EB116505 | CI080984 | CI178632 | AV933398 | AV933381 |
| EB133972 | EB125935 | CI080984 | CI195690 | AV933398 | AV934208 |
| EB133972 | EB126355 | CI080984 | CI209423 | AV933398 | BJ469890 |
| EB133972 | EB132790 | CI080984 | CI213692 | AV933398 | BJ472269 |
| EB133972 | EB133289 | CI080984 | CI219281 | AV933398 | BJ473173 |
| EB133972 | EB137924 | CI080984 | CI234374 | AV933410 | AV926577 |
| EB133972 | EB138039 | CI080984 | CI245162 | AV933410 | BY839238 |
| EB133972 | EB142651 | CI080984 | CI245555 | AV933410 | BY842254 |
| EB133972 | EB143545 | CI080984 | CI246185 | AV933434 | BY837880 |
| EB133972 | EB143554 | CI080984 | CI247306 | AV933447 | BJ469132 |
| EB134014 | EB134372 | CI080984 | CI247604 | AV933447 | BJ472887 |
| EB134046 | CN871131 | CI080984 | CI261887 | AV933461 | AV930401 |
| EB134049 | CN864163 | CI080984 | CI379421 | AV933518 | BJ471109 |
| EB134062 | EB132925 | CI080984 | CI384577 | AV933518 | BJ472441 |
| EB134062 | EB134039 | CI080984 | CI388453 | AV933534 | AV929131 |
| EB134138 | CN903337 | CI080984 | CI388532 | AV933547 | AV934216 |
| EB134185 | EB132685 | CI081697 | CB646197 | AV933547 | AV935105 |
| EB134185 | EB132788 | CI081697 | CI044530 | AV933547 | AV936473 |
| EB134185 | EB133629 | CI082803 | CI060777 | AV933547 | BJ470741 |
| EB134185 | EB133762 | CI082803 | CI066890 | AV933547 | BJ470756 |
| EB134203 | CN864163 | CI082803 | CI079006 | AV933547 | BJ475566 |
| EB134204 | EB132685 | CI082803 | CI085964 | AV933618 | AV927019 |
| EB134281 | EB120167 | CI082803 | CI159974 | AV933618 | AV930401 |
| EB134335 | CN864163 | CI082803 | CI164802 | AV933712 | AV926577 |
| EB134372 | EB133610 | CI082905 | CI081179 | AV933712 | BY842254 |
| EB134382 | CN887761 | CI084246 | CI021212 | AV933715 | AV935920 |
| EB134382 | EB133985 | CI085080 | CI557186 | AV933715 | BJ475847 |
| EB134387 | EB132685 | CI085419 | CI187595 | AV933715 | BJ476110 |
| EB134428 | EB132788 | CI085613 | CI169654 | AV933758 | AV913927 |

|          |          |          |          |          |          |
|----------|----------|----------|----------|----------|----------|
| EB134428 | EB133629 | CI085613 | CI172514 | AV933758 | BJ549953 |
| EB134428 | EB133762 | CI085613 | CI369527 | AV933758 | BY867053 |
| EB134456 | EB132685 | CI087728 | CB671135 | AV933907 | AV932252 |
| EB134493 | EB132925 | CI088060 | CI546039 | AV933945 | BJ549953 |
| EB134493 | EB134039 | CI090368 | CI062335 | AV933958 | AV934216 |
| EB134493 | EB134547 | CI090368 | CI163155 | AV933958 | AV935105 |
| EB134550 | CN864163 | CI090368 | CI204019 | AV933958 | BJ470741 |
| EB134553 | EB124140 | CI090368 | CI262207 | AV933958 | BJ475566 |
| EB134553 | EB124489 | CI090368 | CI267551 | AV933992 | AV933765 |
| EB134564 | CN864163 | CI091444 | CI081179 | AV934037 | BY858018 |
| EB134585 | EB127349 | CI091560 | CI070236 | AV934134 | AV932263 |
| EB134623 | CN864163 | CI091560 | CI087662 | AV934134 | AV934216 |
| EB134667 | CN864163 | CI091560 | CI090032 | AV934134 | AV935105 |
| EB134732 | EB106104 | CI091560 | CI122126 | AV934134 | AV936473 |
| EB134732 | EB128974 | CI091890 | CI046703 | AV934134 | BJ470741 |
| EB134735 | CN864163 | CI091890 | CI138456 | AV934134 | BJ470756 |
| EB134756 | EB126729 | CI092686 | CI194628 | AV934134 | BJ475566 |
| EB134758 | CN864163 | CI092935 | CI097512 | AV934136 | AV926577 |
| EB134770 | CN864163 | CI092935 | CI244859 | AV934136 | BY839238 |
| EB134776 | CN864163 | CI093609 | CI041803 | AV934136 | BY842254 |
| EB134783 | EB116702 | CI094407 | CI010477 | AV934142 | BY846732 |
| EB134805 | EB127875 | CI094407 | CI533401 | AV934171 | AV932154 |
| EB134825 | CN864163 | CI094833 | AU096087 | AV934171 | AV932177 |
| EB134849 | CN864163 | CI094833 | CB648722 | AV934171 | AV932204 |
| EB134874 | CN864163 | CI094833 | CB660007 | AV934171 | AV932611 |
| EB134900 | CN864163 | CI094833 | CB680714 | AV934171 | AV934353 |
| EB134901 | CN878988 | CI094833 | CI009239 | AV934171 | BJ469174 |
| EB134906 | CN864163 | CI094833 | CI010331 | AV934171 | BJ469929 |
| EB134911 | CN864163 | CI094833 | CI017906 | AV934171 | BJ470313 |
| EB134924 | EB110059 | CI094833 | CI029881 | AV934171 | BJ472350 |
| EB134943 | CN864163 | CI094833 | CI030583 | AV934172 | AV932154 |
| EB134995 | EB134462 | CI094898 | CI187595 | AV934172 | AV932177 |
| EB135037 | EB146734 | CI096126 | AU082340 | AV934172 | AV932204 |
| EB135050 | EB116702 | CI098711 | CI298246 | AV934172 | AV933718 |
| EB135075 | EB176490 | CI098975 | CI483264 | AV934172 | AV933797 |
| EB135077 | CN864163 | CI099147 | CI145042 | AV934172 | AV935021 |
| EB135186 | CN864163 | CI101164 | CI204103 | AV934172 | AV935047 |
| EB135225 | CN887552 | CI101538 | CI132767 | AV934172 | AV936104 |
| EB135225 | CN893956 | CI102393 | CI132767 | AV934172 | BJ470313 |
| EB135225 | EB115867 | CI103229 | CI167579 | AV934172 | BJ471729 |
| EB135225 | EB116223 | CI104725 | CI181144 | AV934175 | BY845523 |
| EB135225 | EB116653 | CI105327 | CI099080 | AV934179 | AV930401 |
| EB135225 | EB132731 | CI105564 | CB673062 | AV934180 | AV932532 |
| EB135225 | EB134751 | CI106811 | CI047892 | AV934180 | AV935072 |
| EB135225 | EB135097 | CI106811 | CI106227 | AV934180 | AV936645 |
| EB135225 | EB135318 | CI107165 | CI346463 | AV934180 | BJ471154 |
| EB135225 | EB135326 | CI108226 | CI080171 | AV934180 | BJ471824 |
| EB135225 | EB135508 | CI108226 | CI434642 | AV934180 | BJ473392 |
| EB135225 | EB135721 | CI109852 | CI237332 | AV934183 | BJ473225 |
| EB135225 | EB136506 | CI109852 | CI516159 | AV934186 | AV934274 |
| EB135225 | EB136749 | CI111693 | CI296638 | AV934266 | AV923867 |
| EB135225 | EB136793 | CI111962 | CI276563 | AV934266 | AV932067 |

|          |          |          |          |          |          |
|----------|----------|----------|----------|----------|----------|
| EB135225 | EB136842 | CI114349 | CI088830 | AV934266 | AV933617 |
| EB135225 | EB137095 | CI114349 | CI214276 | AV934266 | BJ546933 |
| EB135225 | EB137689 | CI114349 | CI258626 | AV934266 | BJ547045 |
| EB135225 | EB137901 | CI114349 | CI327781 | AV934266 | BJ547275 |
| EB135225 | EB137991 | CI114349 | CI328354 | AV934266 | BJ547566 |
| EB135225 | EB145048 | CI114349 | CI493982 | AV934266 | BJ547586 |
| EB135225 | EB145080 | CI116249 | CI496859 | AV934266 | BJ547834 |
| EB135225 | EB145275 | CI116249 | CI500188 | AV934303 | AV927019 |
| EB135225 | EB145318 | CI121472 | CI099271 | AV934303 | AV930401 |
| EB135225 | EB146132 | CI121472 | CI103738 | AV934308 | BJ469890 |
| EB135225 | EB146208 | CI123204 | CI192208 | AV934308 | BJ472269 |
| EB135225 | EB146224 | CI123377 | CI158681 | AV934357 | AV932263 |
| EB135236 | CN864163 | CI126601 | CI233301 | AV934357 | AV934216 |
| EB135272 | CN864163 | CI126601 | CI313289 | AV934372 | BJ470999 |
| EB135279 | EB150362 | CI127307 | CB683345 | AV934454 | BJ477066 |
| EB135279 | EB151105 | CI127334 | CI315641 | AV934514 | AV930401 |
| EB135285 | CN864163 | CI128908 | CI132390 | AV934553 | AV932263 |
| EB135425 | CN864163 | CI128908 | CI134415 | AV934553 | AV934216 |
| EB135438 | CN864163 | CI128908 | CI181229 | AV934553 | AV936473 |
| EB135443 | EB175733 | CI128908 | CI243837 | AV934553 | BJ470741 |
| EB135450 | EB177380 | CI130346 | CB658386 | AV934553 | BJ470756 |
| EB135450 | EB177619 | CI130346 | CI218552 | AV934557 | BJ469152 |
| EB135470 | EG631304 | CI130346 | CI356581 | AV934625 | AV916891 |
| EB135482 | CN864163 | CI130513 | CI098155 | AV934625 | AV932114 |
| EB135560 | CN921272 | CI130795 | CI431590 | AV934625 | BJ471177 |
| EB135560 | CN923730 | CI130986 | CI134885 | AV934625 | BJ471310 |
| EB135568 | CN904291 | CI131836 | CB677456 | AV934625 | BJ473236 |
| EB135586 | CN864163 | CI133617 | CI549969 | AV934625 | BJ473809 |
| EB135644 | CN864163 | CI133633 | CI204875 | AV934633 | AV922057 |
| EB135698 | CN864163 | CI133633 | CI252638 | AV934633 | BJ467998 |
| EB135728 | CN864163 | CI133966 | CB650379 | AV934633 | BJ468003 |
| EB135786 | EB121800 | CI134064 | CI269040 | AV934847 | AV925248 |
| EB135813 | CN864163 | CI134492 | CI167579 | AV934847 | AV927019 |
| EB135823 | EB143761 | CI134909 | CB650725 | AV934847 | AV930401 |
| EB135845 | CN904291 | CI134909 | CB674231 | AV934848 | AV930401 |
| EB135859 | EB137843 | CI134909 | CB678605 | AV934878 | AV927202 |
| EB135860 | EB137843 | CI134909 | CI000486 | AV934878 | AV928352 |
| EB135891 | CN864163 | CI134909 | CI012790 | AV934878 | AV928957 |
| EB135914 | CN864163 | CI134909 | CI041560 | AV934878 | AV929500 |
| EB135930 | EB109574 | CI134909 | CI044146 | AV934878 | AV931515 |
| EB135930 | EB112906 | CI134909 | CI055865 | AV934878 | AV932491 |
| EB135930 | EB115885 | CI134909 | CI110760 | AV934878 | AV932793 |
| EB135930 | EB116890 | CI134909 | CI111687 | AV934878 | AV934662 |
| EB135930 | EB117052 | CI134909 | CI113408 | AV934878 | AV934761 |
| EB135930 | EB117173 | CI134909 | CI183808 | AV934878 | AV934857 |
| EB135930 | EB129152 | CI134909 | CI185510 | AV934878 | AV934924 |
| EB135930 | EB130751 | CI134909 | CI562396 | AV934878 | AV934993 |
| EB135930 | EB131484 | CI135124 | AU166591 | AV934878 | AV935188 |
| EB135930 | EB138424 | CI135124 | CI110994 | AV934878 | AV935435 |
| EB135930 | EB141504 | CI135124 | CI111853 | AV934878 | AV935494 |
| EB135930 | EB141782 | CI135124 | CI360915 | AV934878 | AV935531 |
| EB135930 | EB142621 | CI135461 | CI753357 | AV934878 | AV935539 |

|          |          |          |          |          |          |
|----------|----------|----------|----------|----------|----------|
| EB135930 | EB142848 | CI136175 | CB649685 | AV934878 | AV935663 |
| EB135930 | EB143811 | CI137023 | CI545935 | AV934878 | AV935738 |
| EB135930 | EB144084 | CI137118 | CI273952 | AV934878 | AV936029 |
| EB135930 | EB145958 | CI137871 | CI069790 | AV934878 | AV936053 |
| EB135930 | EB151124 | CI139467 | CI346463 | AV934878 | AV936074 |
| EB135930 | EB153363 | CI140847 | CI095934 | AV934878 | AV936084 |
| EB135930 | EB157425 | CI144893 | CI244823 | AV934878 | AV936136 |
| EB135930 | EB175855 | CI146584 | CI183702 | AV934878 | AV936220 |
| EB135930 | EB175931 | CI147498 | CI519476 | AV934878 | AV936747 |
| EB135930 | EB176909 | CI149279 | CI039267 | AV934878 | AV936962 |
| EB135930 | EB176967 | CI150965 | AU182565 | AV934878 | AV937064 |
| EB135930 | EB176986 | CI150965 | CI163980 | AV934878 | BJ469485 |
| EB135930 | EB177050 | CI150965 | CI181163 | AV934878 | BJ470208 |
| EB135930 | EB177221 | CI150965 | CI253589 | AV934878 | BJ470912 |
| EB135930 | EB177546 | CI150965 | CI283934 | AV934878 | BJ473492 |
| EB135930 | EB177612 | CI151777 | CI054499 | AV934878 | BJ473566 |
| EB135930 | EB177613 | CI152142 | CI483264 | AV934878 | BJ473732 |
| EB135930 | EB177655 | CI153941 | CI010937 | AV934878 | BJ474205 |
| EB135930 | EB177702 | CI155643 | CI132767 | AV934878 | BJ474270 |
| EB135930 | EB177706 | CI159281 | CI188306 | AV934878 | BJ474334 |
| EB135930 | EB177792 | CI159349 | CI382955 | AV934878 | BJ474377 |
| EB135998 | EB109002 | CI161451 | CI232768 | AV934878 | BJ474424 |
| EB136025 | EB149010 | CI162672 | CB666246 | AV934878 | BJ474772 |
| EB136069 | CN864163 | CI162672 | CB673240 | AV934878 | BJ474777 |
| EB136137 | CN864163 | CI162672 | CI361337 | AV934878 | BJ474994 |
| EB136148 | CN864163 | CI162672 | CI492850 | AV934878 | BJ475152 |
| EB136155 | CN864163 | CI162672 | CI507234 | AV934878 | BJ475362 |
| EB136161 | CN864163 | CI162672 | CI507349 | AV934878 | BJ475374 |
| EB136196 | EB134844 | CI162672 | CI508601 | AV934878 | BJ475491 |
| EB136211 | CN864163 | CI162672 | CI512017 | AV934878 | BJ476013 |
| EB136253 | EB146972 | CI162672 | CI515097 | AV934878 | BJ476125 |
| EB136254 | CN864163 | CI163063 | AU095937 | AV934878 | BJ476265 |
| EB136268 | CN863764 | CI163063 | CI004048 | AV934878 | BJ476481 |
| EB136268 | CN864437 | CI163063 | CI009224 | AV934878 | BJ476894 |
| EB136268 | CN887552 | CI163063 | CI009298 | AV934878 | BJ476959 |
| EB136268 | CN893956 | CI163063 | CI014526 | AV934878 | BJ477027 |
| EB136268 | CN902028 | CI163063 | CI015193 | AV934878 | BJ477314 |
| EB136268 | CN904776 | CI163063 | CI020477 | AV934878 | BJ477400 |
| EB136268 | EB115867 | CI163063 | CI023576 | AV934878 | BJ477412 |
| EB136268 | EB116223 | CI163063 | CI023855 | AV934880 | AV925248 |
| EB136268 | EB116423 | CI163063 | CI040759 | AV934880 | AV927019 |
| EB136268 | EB116622 | CI163063 | CI054746 | AV934880 | AV930401 |
| EB136268 | EB116653 | CI163063 | CI061712 | AV934884 | AV929888 |
| EB136268 | EB117464 | CI163063 | CI224356 | AV934884 | BY861274 |
| EB136268 | EB117899 | CI165719 | CI211366 | AV935053 | AV922057 |
| EB136268 | EB132731 | CI166166 | CB684254 | AV935053 | BJ467998 |
| EB136268 | EB134674 | CI167798 | CI062335 | AV935053 | BJ468003 |
| EB136268 | EB134751 | CI167798 | CI163155 | AV935077 | AV934216 |
| EB136268 | EB134771 | CI167798 | CI204019 | AV935077 | AV936473 |
| EB136268 | EB134984 | CI167798 | CI262207 | AV935077 | BJ475566 |
| EB136268 | EB135097 | CI170498 | AU056946 | AV935088 | BJ475104 |
| EB136268 | EB135284 | CI170985 | CI140562 | AV935089 | BJ473315 |

|          |          |          |          |          |          |
|----------|----------|----------|----------|----------|----------|
| EB136268 | EB135318 | CI171066 | CI055761 | AV935103 | AV935452 |
| EB136268 | EB135326 | CI171066 | CI169032 | AV935103 | BJ473567 |
| EB136268 | EB135508 | CI171066 | CI209441 | AV935103 | BJ476193 |
| EB136268 | EB135605 | CI171066 | CI209522 | AV935158 | AV935452 |
| EB136268 | EB135611 | CI171066 | CI211857 | AV935168 | AV936473 |
| EB136268 | EB135721 | CI171066 | CI261801 | AV935168 | BJ470741 |
| EB136268 | EB136124 | CI171066 | CI281141 | AV935168 | BJ470756 |
| EB136268 | EB136154 | CI171066 | CI281665 | AV935168 | BJ475566 |
| EB136268 | EB136350 | CI171066 | CI283554 | AV935255 | AV927202 |
| EB136268 | EB136398 | CI171066 | CI421527 | AV935255 | AV928352 |
| EB136268 | EB136506 | CI171510 | AU031671 | AV935255 | AV928957 |
| EB136268 | EB136535 | CI171693 | CI057909 | AV935255 | AV929500 |
| EB136268 | EB136749 | CI172368 | CI369527 | AV935255 | AV931515 |
| EB136268 | EB136793 | CI173049 | CI253602 | AV935255 | AV932491 |
| EB136268 | EB136842 | CI174918 | CI210885 | AV935255 | AV932793 |
| EB136268 | EB137095 | CI174918 | CI284381 | AV935255 | AV934662 |
| EB136268 | EB137689 | CI175292 | C73679   | AV935255 | AV934761 |
| EB136268 | EB137862 | CI175603 | CI237907 | AV935255 | AV934857 |
| EB136268 | EB137901 | CI178074 | CI312143 | AV935255 | AV934924 |
| EB136268 | EB137991 | CI178501 | CI037282 | AV935255 | AV934993 |
| EB136268 | EB138257 | CI178649 | AU166591 | AV935255 | AV935188 |
| EB136268 | EB143218 | CI178649 | CI110994 | AV935255 | AV935435 |
| EB136268 | EB143882 | CI178649 | CI111853 | AV935255 | AV935494 |
| EB136268 | EB144140 | CI178649 | CI360915 | AV935255 | AV935531 |
| EB136268 | EB144986 | CI179508 | CI017475 | AV935255 | AV935539 |
| EB136268 | EB145048 | CI179508 | CI122322 | AV935255 | AV935663 |
| EB136268 | EB145080 | CI179508 | CI377237 | AV935255 | AV935738 |
| EB136268 | EB145275 | CI180680 | CB650919 | AV935255 | AV936029 |
| EB136268 | EB145318 | CI180680 | CB654842 | AV935255 | AV936053 |
| EB136268 | EB145589 | CI180680 | CB657911 | AV935255 | AV936074 |
| EB136268 | EB146132 | CI180680 | CI005749 | AV935255 | AV936084 |
| EB136268 | EB146208 | CI180680 | CI052893 | AV935255 | AV936136 |
| EB136268 | EB146224 | CI180680 | CI149213 | AV935255 | AV936220 |
| EB136268 | EB146229 | CI180680 | CI201096 | AV935255 | AV936747 |
| EB136268 | EB146258 | CI180680 | CI258162 | AV935255 | AV936962 |
| EB136268 | EB175659 | CI181676 | CI157335 | AV935255 | AV937064 |
| EB136268 | EB175704 | CI181676 | CI230940 | AV935255 | BJ469485 |
| EB136268 | EB176766 | CI184680 | CI183725 | AV935255 | BJ470208 |
| EB136268 | EB177917 | CI184680 | CI201754 | AV935255 | BJ470912 |
| EB136352 | CN864163 | CI184680 | CI546836 | AV935255 | BJ473492 |
| EB136363 | EB156920 | CI185856 | CI269040 | AV935255 | BJ473566 |
| EB136381 | EB130306 | CI185931 | CI163404 | AV935255 | BJ473732 |
| EB136381 | EB132263 | CI185931 | CI184274 | AV935255 | BJ474205 |
| EB136381 | EB142921 | CI185931 | CI211464 | AV935255 | BJ474270 |
| EB136392 | CN864163 | CI185935 | CI080171 | AV935255 | BJ474334 |
| EB136409 | CN864163 | CI185935 | CI434642 | AV935255 | BJ474377 |
| EB136410 | EB150260 | CI186248 | CI120979 | AV935255 | BJ474424 |
| EB136410 | EB176060 | CI187250 | CB650756 | AV935255 | BJ474772 |
| EB136410 | EB176400 | CI187250 | CI183718 | AV935255 | BJ474777 |
| EB136410 | EB176750 | CI187250 | CI185714 | AV935255 | BJ474994 |
| EB136423 | EB108702 | CI187250 | CI549706 | AV935255 | BJ475152 |
| EB136427 | EB126729 | CI187822 | CI546039 | AV935255 | BJ475362 |

|          |          |          |          |          |          |
|----------|----------|----------|----------|----------|----------|
| EB136476 | CN864163 | CI188494 | CI189501 | AV935255 | BJ475374 |
| EB136494 | CN864163 | CI189248 | CI188793 | AV935255 | BJ475491 |
| EB136567 | CN864163 | CI189248 | CI430635 | AV935255 | BJ476013 |
| EB136577 | CN864163 | CI189723 | CI235065 | AV935255 | BJ476125 |
| EB136578 | CN864163 | CI190370 | CI158657 | AV935255 | BJ476265 |
| EB136599 | EB117543 | CI192106 | CB636481 | AV935255 | BJ476481 |
| EB136681 | CN864163 | CI192317 | CB642980 | AV935255 | BJ476894 |
| EB136687 | CN864163 | CI192317 | CI228759 | AV935255 | BJ476959 |
| EB136718 | EB151105 | CI192317 | CI270205 | AV935255 | BJ477027 |
| EB136772 | CN864163 | CI193257 | CI158402 | AV935255 | BJ477314 |
| EB136825 | EB110059 | CI193257 | CI158466 | AV935255 | BJ477400 |
| EB136905 | CN864163 | CI193257 | CI158692 | AV935255 | BJ477412 |
| EB136911 | CN864163 | CI193257 | CI161541 | AV935387 | AV933529 |
| EB136983 | EB150362 | CI193257 | CI161816 | AV935387 | AV935013 |
| EB137024 | EB126729 | CI193257 | CI228860 | AV935387 | BJ471568 |
| EB137089 | EB116003 | CI193257 | CI229067 | AV935387 | BJ471570 |
| EB137089 | EB130265 | CI193257 | CI229623 | AV935403 | BJ547150 |
| EB137101 | CN864163 | CI194307 | CB644923 | AV935403 | BJ547970 |
| EB137171 | EB137843 | CI194307 | CI049968 | AV935461 | AV927202 |
| EB137230 | EB152950 | CI194929 | CI158657 | AV935461 | AV928352 |
| EB137271 | EB108540 | CI198512 | CI121134 | AV935461 | AV928957 |
| EB137275 | CN864163 | CI198512 | CI156119 | AV935461 | AV929500 |
| EB137284 | CN864163 | CI198512 | CI193391 | AV935461 | AV931515 |
| EB137297 | EB151105 | CI198512 | CI196775 | AV935461 | AV932491 |
| EB137300 | EB126805 | CI200625 | CI054499 | AV935461 | AV932793 |
| EB137378 | CN864163 | CI202989 | CI149052 | AV935461 | AV934662 |
| EB137477 | EB137843 | CI202989 | CI149438 | AV935461 | AV934761 |
| EB137570 | EB125192 | CI202989 | CI152280 | AV935461 | AV934857 |
| EB137647 | EB120264 | CI202989 | CI152929 | AV935461 | AV934924 |
| EB137660 | EB177203 | CI202989 | CI208503 | AV935461 | AV934993 |
| EB137660 | EB177380 | CI202989 | CI252346 | AV935461 | AV935188 |
| EB137660 | EB177619 | CI202989 | CI449260 | AV935461 | AV935435 |
| EB137670 | EB140886 | CI202989 | CI467872 | AV935461 | AV935494 |
| EB137688 | EB145393 | CI203273 | CI054499 | AV935461 | AV935531 |
| EB137753 | EB120415 | CI204818 | CI158999 | AV935461 | AV935539 |
| EB137774 | CN904291 | CI205910 | AU094955 | AV935461 | AV935663 |
| EB137788 | EB137843 | CI207069 | CI298246 | AV935461 | AV935738 |
| EB137837 | EB137843 | CI207094 | CI253602 | AV935461 | AV936029 |
| EB137852 | EB137843 | CI207465 | CI079875 | AV935461 | AV936053 |
| EB137946 | EB137843 | CI208861 | CI725964 | AV935461 | AV936074 |
| EB138019 | EB151105 | CI210033 | CI057193 | AV935461 | AV936084 |
| EB138119 | CN864163 | CI210033 | CI141287 | AV935461 | AV936136 |
| EB138141 | CN864163 | CI210033 | CI142723 | AV935461 | AV936220 |
| EB138287 | CN864163 | CI210033 | CI145159 | AV935461 | AV936747 |
| EB138338 | CN864163 | CI210033 | CI199174 | AV935461 | AV936962 |
| EB138341 | EB115369 | CI210033 | CI205581 | AV935461 | AV937064 |
| EB138341 | EB115830 | CI210033 | CI219608 | AV935461 | BJ469485 |
| EB138341 | EB116247 | CI210033 | CI262574 | AV935461 | BJ470208 |
| EB138341 | EB136202 | CI210033 | CI262952 | AV935461 | BJ470912 |
| EB138341 | EB137187 | CI210114 | CI208708 | AV935461 | BJ473492 |
| EB138341 | EB138349 | CI210614 | CI263497 | AV935461 | BJ473566 |
| EB138341 | EB144677 | CI210846 | CI255429 | AV935461 | BJ473732 |

|          |          |          |          |          |          |
|----------|----------|----------|----------|----------|----------|
| EB138401 | EB135380 | CI212695 | CI010477 | AV935461 | BJ474205 |
| EB140906 | EB157513 | CI212695 | CI533401 | AV935461 | BJ474270 |
| EB141091 | EB120264 | CI213088 | CI490754 | AV935461 | BJ474334 |
| EB141097 | EB120264 | CI213754 | AU094235 | AV935461 | BJ474377 |
| EB141130 | CN864163 | CI213754 | C74137   | AV935461 | BJ474424 |
| EB141194 | EB125192 | CI213754 | CI032001 | AV935461 | BJ474772 |
| EB141201 | EB127077 | CI213754 | CI055006 | AV935461 | BJ474777 |
| EB141201 | EB136336 | CI213754 | CI059035 | AV935461 | BJ474994 |
| EB141206 | CN864163 | CI213754 | CI059627 | AV935461 | BJ475152 |
| EB141304 | EB124140 | CI213754 | CI060511 | AV935461 | BJ475362 |
| EB141458 | EB126678 | CI213754 | CI060877 | AV935461 | BJ475374 |
| EB141542 | EB152950 | CI213754 | CI062229 | AV935461 | BJ475491 |
| EB141561 | CN882643 | CI213754 | CI063004 | AV935461 | BJ476013 |
| EB141597 | EB119037 | CI213754 | CI063289 | AV935461 | BJ476125 |
| EB141930 | EB133754 | CI213754 | CI169250 | AV935461 | BJ476265 |
| EB141997 | CN864163 | CI213754 | CI174077 | AV935461 | BJ476481 |
| EB142031 | EB124645 | CI213754 | CI208780 | AV935461 | BJ476894 |
| EB142032 | EB123403 | CI213754 | CI209445 | AV935461 | BJ476959 |
| EB142157 | CN864163 | CI213754 | CI241631 | AV935461 | BJ477027 |
| EB142210 | CN864163 | CI213754 | CI298291 | AV935461 | BJ477314 |
| EB142634 | CN890688 | CI213754 | CI306846 | AV935461 | BJ477400 |
| EB142634 | EB128432 | CI213754 | CI611152 | AV935461 | BJ477412 |
| EB142681 | EB118509 | CI213754 | CI634048 | AV935500 | AV925248 |
| EB142694 | EB150362 | CI213754 | CI654771 | AV935500 | AV927019 |
| EB142694 | EB151105 | CI213754 | CI663914 | AV935500 | AV930401 |
| EB142708 | EB150362 | CI213754 | CI737511 | AV935503 | AV936530 |
| EB142800 | EB119037 | CI213754 | D49140   | AV935537 | BJ469580 |
| EB142805 | CN864163 | CI214456 | CI187595 | AV935537 | BJ471492 |
| EB142828 | EB110277 | CI216136 | CI081179 | AV935581 | BJ546909 |
| EB142862 | CN864163 | CI216618 | CI020963 | AV935583 | AV934216 |
| EB142881 | EB110277 | CI216618 | CI154270 | AV935583 | AV936473 |
| EB142887 | CN864163 | CI218493 | CI269040 | AV935583 | BJ475566 |
| EB142956 | EB110277 | CI219407 | CI002370 | AV935584 | AV927019 |
| EB142987 | CN864163 | CI219407 | CI193434 | AV935584 | AV930401 |
| EB143002 | CN887905 | CI219818 | AU166591 | AV935619 | AV918435 |
| EB143106 | CN864163 | CI219818 | CI110994 | AV935692 | BJ472336 |
| EB143131 | CN864163 | CI219818 | CI111853 | AV935697 | BY867053 |
| EB143197 | EB115830 | CI219818 | CI360915 | AV935706 | BJ549953 |
| EB143197 | EB116247 | CI220615 | CI054499 | AV935706 | BY867053 |
| EB143197 | EB137796 | CI221384 | CI113697 | AV935779 | BJ473567 |
| EB143197 | EB137932 | CI222859 | CI244823 | AV935779 | BJ476193 |
| EB143197 | EB138349 | CI228330 | CI145042 | AV935784 | BJ470316 |
| EB143197 | EB145351 | CI229592 | CI118943 | AV935806 | BJ470999 |
| EB143496 | EB110277 | CI229592 | CI192101 | AV935822 | BJ476143 |
| EB143561 | EB110277 | CI229592 | CI231744 | AV935849 | BJ473315 |
| EB143871 | CN864163 | CI229592 | CI232411 | AV935915 | AV927019 |
| EB143987 | CN864163 | CI229592 | CI234143 | AV935915 | AV930401 |
| EB144055 | CN864163 | CI230099 | CI228603 | AV935922 | AV927343 |
| EB144059 | EB119038 | CI230099 | CI231641 | AV935971 | AV929131 |
| EB144091 | CN864163 | CI230099 | CI235104 | AV935978 | AV930737 |
| EB144097 | EB110277 | CI230877 | CI230770 | AV935978 | AV932555 |
| EB144211 | EB140966 | CI232244 | CI160291 | AV935978 | AV933703 |



|          |          |          |          |          |          |
|----------|----------|----------|----------|----------|----------|
| EB144211 | EB141159 | CI232244 | CI160483 | AV935978 | AV934660 |
| EB144211 | EB142947 | CI232244 | CI193391 | AV935978 | AV934857 |
| EB144321 | CN904291 | CI232244 | CI230357 | AV935978 | AV934928 |
| EB144343 | CN864163 | CI232661 | CI065617 | AV935978 | AV935155 |
| EB144344 | CN864163 | CI232661 | CI075214 | AV935978 | AV935222 |
| EB144358 | EB137843 | CI232661 | CI160247 | AV935978 | AV935304 |
| EB144366 | EB151105 | CI232661 | CI185599 | AV935978 | AV935435 |
| EB144386 | CN864163 | CI232661 | CI252884 | AV935978 | AV935531 |
| EB144433 | EB151105 | CI234512 | CI158657 | AV935978 | AV935663 |
| EB144455 | CN864163 | CI234936 | CI187595 | AV935978 | AV935738 |
| EB144548 | EB146972 | CI240386 | CI213177 | AV935978 | AV935823 |
| EB144684 | CN864163 | CI241737 | CI549969 | AV935978 | AV935842 |
| EB144884 | EB110059 | CI242260 | CI138661 | AV935978 | AV935879 |
| EB144901 | CN864163 | CI242260 | CI201046 | AV935978 | AV936113 |
| EB145003 | CN891608 | CI242302 | AU181386 | AV935978 | AV936211 |
| EB145003 | CN940701 | CI242302 | AU182583 | AV935978 | AV936345 |
| EB145058 | EB113729 | CI242302 | CI152841 | AV935978 | AV936411 |
| EB145095 | EB134174 | CI242302 | CI163182 | AV935978 | AV936448 |
| EB145198 | EB136964 | CI242302 | CI174616 | AV935978 | AV936689 |
| EB145198 | EB157007 | CI242302 | CI190403 | AV935978 | AV936774 |
| EB145354 | CN864163 | CI242302 | CI209832 | AV935978 | AV936797 |
| EB145361 | EB131266 | CI242302 | CI209964 | AV935978 | AV936939 |
| EB145366 | CN864163 | CI242302 | CI214531 | AV935978 | AV937019 |
| EB145404 | CN864163 | CI242302 | CI283995 | AV935978 | BJ471598 |
| EB145411 | EB136913 | CI244190 | CI236912 | AV935978 | BJ473492 |
| EB145424 | EB137843 | CI244354 | CI145042 | AV935978 | BJ473798 |
| EB145433 | EB115369 | CI244946 | CI107478 | AV935978 | BJ473908 |
| EB145433 | EB115830 | CI246132 | CB656140 | AV935978 | BJ474377 |
| EB145433 | EB116247 | CI246132 | CB659343 | AV935978 | BJ474424 |
| EB145433 | EB136202 | CI246132 | CB662372 | AV935978 | BJ474578 |
| EB145433 | EB136470 | CI246132 | CB673567 | AV935978 | BJ474671 |
| EB145433 | EB137187 | CI246132 | CB673625 | AV935978 | BJ474736 |
| EB145433 | EB144677 | CI246132 | CI001442 | AV935978 | BJ475061 |
| EB145457 | CN864163 | CI246132 | CI176094 | AV935978 | BJ475188 |
| EB145459 | EB109310 | CI246132 | CI244750 | AV935978 | BJ475328 |
| EB145459 | EB109576 | CI248107 | CI132390 | AV935978 | BJ475374 |
| EB145459 | EB109873 | CI248107 | CI134415 | AV935978 | BJ475377 |
| EB145459 | EB126697 | CI248107 | CI181229 | AV935978 | BJ475396 |
| EB145459 | EB129359 | CI248107 | CI243837 | AV935978 | BJ475398 |
| EB145459 | EB131579 | CI249601 | CI483264 | AV935978 | BJ475968 |
| EB145463 | CN864163 | CI250894 | CI083753 | AV935978 | BJ476013 |
| EB145467 | CN864163 | CI253611 | CB656140 | AV935978 | BJ476123 |
| EB145520 | CN864163 | CI253611 | CB662372 | AV935978 | BJ476236 |
| EB145529 | EB132738 | CI254363 | CI515282 | AV935978 | BJ476265 |
| EB145533 | CN864163 | CI254897 | CI515282 | AV935978 | BJ476481 |
| EB145571 | CN864163 | CI254985 | CI211711 | AV935978 | BJ476557 |
| EB145631 | CN864163 | CI255289 | CI058589 | AV935978 | BJ476815 |
| EB145751 | CN864163 | CI255289 | CI208565 | AV935978 | BJ476959 |
| EB145793 | EB110059 | CI255433 | CI644231 | AV935978 | BJ477237 |
| EB145834 | CN864163 | CI255490 | CI210732 | AV935978 | BJ477450 |
| EB145882 | CN862719 | CI255490 | CI554433 | AV935978 | BJ477490 |
| EB145882 | CN863764 | CI255809 | CI283083 | AV935978 | BJ477495 |

|          |          |          |          |          |          |
|----------|----------|----------|----------|----------|----------|
| EB145882 | CN890414 | CI257070 | AU094027 | AV935978 | BJ477533 |
| EB145882 | CN890917 | CI260186 | CI002618 | AV935978 | BY859113 |
| EB145882 | EB115867 | CI260186 | CI091750 | AV935982 | AV936473 |
| EB145882 | EB116102 | CI260186 | CI219811 | AV935982 | BJ470741 |
| EB145882 | EB117376 | CI260186 | CI247094 | AV935982 | BJ470756 |
| EB145882 | EB117464 | CI260186 | CI249942 | AV936064 | BJ546915 |
| EB145882 | EB132731 | CI260186 | CI251379 | AV936064 | BJ547463 |
| EB145882 | EB134531 | CI260295 | CI715942 | AV936076 | BJ546915 |
| EB145882 | EB134692 | CI260295 | CI724534 | AV936076 | BJ547463 |
| EB145882 | EB134719 | CI260295 | CI731116 | AV936199 | AV932263 |
| EB145882 | EB134745 | CI260690 | CI027284 | AV936199 | AV934216 |
| EB145882 | EB134771 | CI260768 | CI624390 | AV936199 | AV935105 |
| EB145882 | EB134864 | CI263020 | CI020963 | AV936199 | AV936473 |
| EB145882 | EB134909 | CI263020 | CI154270 | AV936199 | BJ470741 |
| EB145882 | EB135002 | CI263497 | CI169437 | AV936206 | AV923205 |
| EB145882 | EB135040 | CI264735 | CI263497 | AV936238 | AV935452 |
| EB145882 | EB135097 | CI265182 | CI263151 | AV936238 | BJ473567 |
| EB145882 | EB135222 | CI265182 | CI266339 | AV936238 | BJ476193 |
| EB145882 | EB135244 | CI265680 | CI032555 | AV936269 | AV930182 |
| EB145882 | EB135325 | CI266338 | CB656140 | AV936370 | BJ462528 |
| EB145882 | EB135328 | CI266338 | CB659343 | AV936375 | BY877515 |
| EB145882 | EB135721 | CI266338 | CB662372 | AV936384 | AV934216 |
| EB145882 | EB135734 | CI266338 | CB673625 | AV936384 | AV935105 |
| EB145882 | EB135843 | CI266984 | CI029450 | AV936384 | AV936473 |
| EB145882 | EB135853 | CI266984 | CI454600 | AV936384 | BJ470741 |
| EB145882 | EB135937 | CI267839 | CI213570 | AV936384 | BJ475566 |
| EB145882 | EB136445 | CI267839 | CI213698 | AV936404 | AV934216 |
| EB145882 | EB136535 | CI267839 | CI214043 | AV936404 | AV935105 |
| EB145882 | EB136677 | CI267839 | CI237170 | AV936404 | AV936473 |
| EB145882 | EB137323 | CI267839 | CI255869 | AV936404 | BJ470741 |
| EB145882 | EB137689 | CI267839 | CI268999 | AV936404 | BJ475566 |
| EB145882 | EB137699 | CI268582 | CB682605 | AV936423 | AV932154 |
| EB145882 | EB137743 | CI268582 | CI209217 | AV936423 | AV932177 |
| EB145882 | EB137826 | CI268582 | CI211758 | AV936423 | AV932204 |
| EB145882 | EB137954 | CI268582 | CI211889 | AV936423 | AV933797 |
| EB145882 | EB137991 | CI268582 | CI266235 | AV936423 | AV934353 |
| EB145882 | EB138026 | CI268927 | CI010937 | AV936423 | BJ469929 |
| EB145882 | EB138126 | CI269337 | CI261564 | AV936423 | BJ470313 |
| EB145882 | EB142654 | CI270446 | CI158657 | AV936423 | BJ471729 |
| EB145882 | EB142705 | CI272027 | CI125320 | AV936423 | BJ472350 |
| EB145882 | EB143180 | CI272658 | CI192461 | AV936423 | BJ472437 |
| EB145882 | EB143210 | CI272658 | CI195753 | AV936432 | AV932532 |
| EB145882 | EB143882 | CI272658 | CI229386 | AV936432 | AV933083 |
| EB145882 | EB144657 | CI272658 | CI233811 | AV936432 | BJ475167 |
| EB145882 | EB144843 | CI274182 | CI278325 | AV936439 | AV936530 |
| EB145882 | EB144986 | CI277114 | CI188793 | AV936441 | AV932532 |
| EB145882 | EB145080 | CI277114 | CI430635 | AV936441 | AV935072 |
| EB145882 | EB145232 | CI280211 | CI546039 | AV936441 | AV936645 |
| EB145882 | EB145290 | CI281013 | CI063571 | AV936441 | BJ471154 |
| EB145882 | EB145589 | CI281909 | CI264676 | AV936441 | BJ471824 |
| EB145882 | EB145637 | CI281909 | CI268700 | AV936441 | BJ473392 |
| EB145882 | EB145677 | CI282360 | CI057062 | AV936443 | BY861274 |

|          |          |          |          |          |          |
|----------|----------|----------|----------|----------|----------|
| EB145882 | EB145725 | CI282360 | CI058886 | AV936446 | AV922655 |
| EB145882 | EB145765 | CI282360 | CI060245 | AV936446 | AV927164 |
| EB145882 | EB145922 | CI282360 | CI165381 | AV936446 | AV936674 |
| EB145882 | EB146286 | CI282360 | CI165551 | AV936446 | BJ471809 |
| EB145882 | EB175659 | CI282360 | CI207506 | AV936446 | BJ472183 |
| EB145882 | EB176208 | CI282360 | CI254514 | AV936464 | AU089911 |
| EB145882 | EB176473 | CI282360 | CI254659 | AV936464 | AV927513 |
| EB145882 | EB176766 | CI282360 | CI255521 | AV936464 | AV930737 |
| EB145882 | EB177831 | CI282360 | CI284508 | AV936464 | AV933703 |
| EB145882 | EB177917 | CI282360 | CI284899 | AV936464 | AV934903 |
| EB145882 | EB178016 | CI283774 | CI369527 | AV936464 | AV934993 |
| EB146018 | CN864163 | CI283974 | CI188793 | AV936464 | AV935270 |
| EB146065 | CN864163 | CI283974 | CI430635 | AV936464 | AV935304 |
| EB146179 | EB113729 | CI284300 | CI549969 | AV936464 | AV935340 |
| EB146183 | EB150362 | CI285178 | CI262081 | AV936464 | AV935538 |
| EB146183 | EB151105 | CI287189 | C25212   | AV936464 | AV935539 |
| EB146220 | CN864163 | CI287189 | CI286960 | AV936464 | AV936121 |
| EB146241 | CN864163 | CI287189 | CI287084 | AV936464 | AV936122 |
| EB146257 | CN864163 | CI287189 | CI287234 | AV936464 | AV936140 |
| EB146284 | EB141379 | CI287189 | CI287953 | AV936464 | AV936266 |
| EB146294 | CN864163 | CI287189 | CI289053 | AV936464 | AV936751 |
| EB146351 | EB115369 | CI287189 | CI289534 | AV936464 | AV937019 |
| EB146351 | EB115830 | CI287189 | CI290073 | AV936464 | BJ470208 |
| EB146351 | EB116247 | CI287189 | CI290222 | AV936464 | BJ470912 |
| EB146351 | EB137932 | CI287189 | CI290420 | AV936464 | BJ473883 |
| EB146392 | CN864163 | CI287189 | CI291724 | AV936464 | BJ474121 |
| EB146439 | CN901900 | CI287189 | CI291937 | AV936464 | BJ474347 |
| EB146453 | EB148425 | CI287189 | CI292037 | AV936464 | BJ475061 |
| EB146495 | EB106104 | CI287189 | CI292801 | AV936464 | BJ475328 |
| EB146500 | EB149092 | CI287189 | CI292881 | AV936464 | BJ475374 |
| EB146632 | CN883480 | CI287189 | CI293433 | AV936464 | BJ475560 |
| EB146665 | CN907153 | CI287189 | CI293522 | AV936464 | BJ475738 |
| EB146665 | CN919342 | CI287189 | CI301022 | AV936464 | BJ476013 |
| EB146665 | EB147817 | CI287219 | CI638614 | AV936464 | BJ476198 |
| EB146794 | EB153058 | CI288264 | CI687042 | AV936464 | BJ476445 |
| EB146877 | CN873929 | CI289064 | CI287251 | AV936464 | BJ476557 |
| EB146877 | CN907126 | CI293534 | BP433021 | AV936464 | BJ477400 |
| EB146877 | CN907355 | CI293534 | CB645548 | AV936464 | BJ477495 |
| EB146877 | CN939782 | CI293534 | CB652677 | AV936464 | BY859057 |
| EB146877 | CN942901 | CI293534 | CB653590 | AV936464 | BY862140 |
| EB146877 | CN943538 | CI293534 | CB662160 | AV936560 | AV927019 |
| EB146877 | CN948123 | CI293534 | CI660975 | AV936560 | AV930401 |
| EB146877 | EB148133 | CI294354 | CI332795 | AV936569 | BJ468973 |
| EB146877 | EB148180 | CI295024 | CB645906 | AV936611 | BJ547276 |
| EB146915 | CN878903 | CI295139 | AU096462 | AV936617 | AV935452 |
| EB146915 | CN879960 | CI295139 | CB646336 | AV936617 | BJ476193 |
| EB146915 | CN907126 | CI295139 | CB657538 | AV936635 | AV934216 |
| EB146915 | CN907350 | CI295139 | CI001038 | AV936635 | AV936473 |
| EB146915 | CN919240 | CI295139 | CI013134 | AV936639 | AV932097 |
| EB146915 | CN930709 | CI295139 | CI021408 | AV936639 | AV933561 |
| EB146915 | CN931638 | CI295444 | CB685632 | AV936639 | AV935996 |
| EB146915 | CN936965 | CI296835 | CI032367 | AV936639 | BJ473189 |

|          |          |          |          |          |          |
|----------|----------|----------|----------|----------|----------|
| EB146915 | CN940031 | CI297289 | CI169031 | AV936641 | AV927202 |
| EB146915 | CN941534 | CI297289 | CI431588 | AV936641 | AV928352 |
| EB146915 | CN941566 | CI297988 | CI069348 | AV936641 | AV928957 |
| EB146915 | CN943728 | CI297988 | CI644460 | AV936641 | AV929500 |
| EB146915 | CN948142 | CI298413 | CI290907 | AV936641 | AV931515 |
| EB146915 | CN948761 | CI298820 | CB645906 | AV936641 | AV932491 |
| EB146915 | CN948805 | CI299084 | CI638207 | AV936641 | AV932793 |
| EB146915 | EB148478 | CI299693 | CB668485 | AV936641 | AV934662 |
| EB146985 | CN864163 | CI299744 | CI663666 | AV936641 | AV934761 |
| EB146989 | EB119560 | CI301135 | CI211169 | AV936641 | AV934857 |
| EB146989 | EB126620 | CI301135 | CI241528 | AV936641 | AV934924 |
| EB146989 | EB130601 | CI301135 | CI243131 | AV936641 | AV934993 |
| EB146989 | EB132298 | CI301185 | CB645906 | AV936641 | AV935188 |
| EB146989 | EB133030 | CI301490 | CI586220 | AV936641 | AV935435 |
| EB146989 | EB136816 | CI302215 | CI584345 | AV936641 | AV935494 |
| EB146989 | EB157169 | CI302237 | CI254469 | AV936641 | AV935531 |
| EB147018 | CN879960 | CI302237 | CI710570 | AV936641 | AV935539 |
| EB147018 | CN919240 | CI304075 | CI645722 | AV936641 | AV935663 |
| EB147018 | CN936965 | CI304387 | CI058705 | AV936641 | AV935738 |
| EB147018 | CN941534 | CI304387 | CI305536 | AV936641 | AV936029 |
| EB147018 | CN941566 | CI304590 | CI571368 | AV936641 | AV936053 |
| EB147018 | CN948761 | CI304590 | CI746871 | AV936641 | AV936074 |
| EB147018 | CN948805 | CI304906 | CI250528 | AV936641 | AV936084 |
| EB147018 | EB148180 | CI304962 | CI305183 | AV936641 | AV936136 |
| EB147018 | EB148478 | CI305139 | CI660418 | AV936641 | AV936220 |
| EB147018 | EB148759 | CI305139 | CI762943 | AV936641 | AV936747 |
| EB147019 | EB128421 | CI305680 | CI515282 | AV936641 | AV936962 |
| EB147034 | EB152950 | CI305816 | CI655837 | AV936641 | AV937064 |
| EB147075 | EB112911 | CI305867 | CB645906 | AV936641 | BJ469485 |
| EB147088 | EB148450 | CI306112 | CI172080 | AV936641 | BJ470208 |
| EB147093 | CN939491 | CI306524 | CI724436 | AV936641 | BJ470912 |
| EB147096 | CN862454 | CI306626 | CI724436 | AV936641 | BJ473492 |
| EB147096 | CN866335 | CI307059 | AU092633 | AV936641 | BJ473566 |
| EB147110 | EB149024 | CI307059 | CI018610 | AV936641 | BJ473732 |
| EB147130 | CN873929 | CI307059 | CI024644 | AV936641 | BJ474205 |
| EB147130 | CN878903 | CI307059 | CI028212 | AV936641 | BJ474270 |
| EB147130 | CN881681 | CI307059 | CI059252 | AV936641 | BJ474334 |
| EB147130 | CN906951 | CI307059 | CI059692 | AV936641 | BJ474377 |
| EB147130 | CN907126 | CI307059 | CI060594 | AV936641 | BJ474424 |
| EB147130 | CN907246 | CI307059 | CI060920 | AV936641 | BJ474772 |
| EB147130 | CN907350 | CI307059 | CI061498 | AV936641 | BJ474777 |
| EB147130 | CN907355 | CI307059 | CI063112 | AV936641 | BJ474994 |
| EB147130 | CN919240 | CI307059 | CI063779 | AV936641 | BJ475152 |
| EB147130 | CN930709 | CI307059 | CI063801 | AV936641 | BJ475362 |
| EB147130 | CN930734 | CI307059 | CI172320 | AV936641 | BJ475374 |
| EB147130 | CN931638 | CI307059 | CI173375 | AV936641 | BJ475491 |
| EB147130 | CN934605 | CI307059 | CI205488 | AV936641 | BJ476013 |
| EB147130 | CN939782 | CI307059 | CI210407 | AV936641 | BJ476125 |
| EB147130 | CN941566 | CI307059 | CI210482 | AV936641 | BJ476265 |
| EB147130 | CN943336 | CI307059 | CI212053 | AV936641 | BJ476481 |
| EB147130 | CN943728 | CI307059 | CI212713 | AV936641 | BJ476894 |
| EB147130 | CN945200 | CI307059 | CI236789 | AV936641 | BJ476959 |

|          |          |          |          |          |          |
|----------|----------|----------|----------|----------|----------|
| EB147130 | CN948142 | CI307059 | CI239572 | AV936641 | BJ477027 |
| EB147130 | CN948638 | CI307059 | CI253477 | AV936641 | BJ477314 |
| EB147130 | CN948761 | CI307059 | CI254781 | AV936641 | BJ477400 |
| EB147130 | EB147518 | CI307059 | CI279851 | AV936641 | BJ477412 |
| EB147130 | EB148133 | CI307059 | CI280986 | AV936725 | BJ476764 |
| EB147130 | EB148478 | CI307059 | CI284072 | AV936764 | AV933055 |
| EB147130 | EB148493 | CI307059 | CI284118 | AV936868 | AV925248 |
| EB147130 | EB148665 | CI307059 | CI285093 | AV936868 | AV927019 |
| EB147199 | EB150864 | CI307059 | CI637369 | AV936868 | AV930401 |
| EB147242 | CN873929 | CI307059 | CI642023 | AV936888 | AV932044 |
| EB147242 | CN879960 | CI307059 | CI644575 | AV936888 | AV932788 |
| EB147242 | CN907126 | CI307059 | CI665500 | AV936888 | AV934883 |
| EB147242 | CN907280 | CI307059 | CI673301 | AV936888 | AV935172 |
| EB147242 | CN919240 | CI307059 | CI692710 | AV936888 | AV935421 |
| EB147242 | CN936965 | CI307778 | CI755614 | AV936888 | BJ476964 |
| EB147242 | CN940031 | CI308727 | CI723137 | AV936916 | BJ475847 |
| EB147242 | CN941534 | CI309023 | CI310209 | AV936936 | AV934216 |
| EB147242 | CN941566 | CI310919 | C28594   | AV936936 | AV936473 |
| EB147242 | CN942901 | CI310919 | CI309656 | AV936968 | BJ470999 |
| EB147242 | CN943538 | CI310919 | CI668287 | AV937018 | AV935452 |
| EB147242 | CN948123 | CI310919 | CI692600 | AV937018 | BJ473567 |
| EB147242 | CN948761 | CI311266 | CI305183 | AV937145 | BY861274 |
| EB147242 | CN948805 | CI311371 | CI255719 | AV937195 | AV927019 |
| EB147242 | EB148478 | CI311371 | CI285196 | AV937195 | AV930401 |
| EB147247 | CN945174 | CI312745 | CI262945 | AV937245 | AV935452 |
| EB147247 | EB117625 | CI314179 | CB651761 | AV937256 | AV932263 |
| EB147247 | EB126870 | CI314694 | CI019916 | AV937256 | AV934216 |
| EB147247 | EB128769 | CI314694 | CI353377 | AV937256 | BJ475566 |
| EB147247 | EB129918 | CI318555 | CI515589 | AV937262 | AV925248 |
| EB147247 | EB131304 | CI319268 | CB666246 | AV937262 | AV927019 |
| EB147247 | EB134919 | CI319268 | CB673240 | AV937262 | AV930401 |
| EB147247 | EB137062 | CI319268 | CI361337 | BJ462439 | AV912888 |
| EB147247 | EB137383 | CI319268 | CI492850 | BJ462748 | BJ466209 |
| EB147247 | EB142182 | CI319268 | CI507234 | BJ462809 | AV915542 |
| EB147247 | EB144800 | CI319268 | CI507349 | BJ462884 | AV928483 |
| EB147247 | EB144880 | CI319268 | CI508601 | BJ463070 | AV912888 |
| EB147247 | EB146270 | CI319268 | CI512017 | BJ463164 | BJ472405 |
| EB147247 | EB148043 | CI319268 | CI515097 | BJ463258 | AV928483 |
| EB147252 | EB147105 | CI323489 | CB637214 | BJ463367 | AV923305 |
| EB147259 | CN907246 | CI323489 | CI382224 | BJ463367 | AV928483 |
| EB147259 | CN907280 | CI330932 | CB676004 | BJ463473 | BY871745 |
| EB147259 | CN930734 | CI330932 | CI417775 | BJ463871 | BJ468825 |
| EB147259 | CN948142 | CI332058 | CB649914 | BJ463903 | AV914212 |
| EB147259 | EB147518 | CI332058 | CB653078 | BJ464148 | AV923305 |
| EB147259 | EB148665 | CI332058 | CB664263 | BJ464148 | AV928483 |
| EB147272 | CN873929 | CI332058 | CB667632 | BJ464328 | BY874315 |
| EB147272 | CN907246 | CI332058 | CB681303 | BJ464328 | BY875354 |
| EB147272 | CN938978 | CI332058 | CI112966 | BJ464328 | BY875380 |
| EB147273 | CN881849 | CI332058 | CI356078 | BJ464457 | AV915542 |
| EB147295 | CN873929 | CI332058 | CI492549 | BJ464566 | AV915542 |
| EB147295 | CN879960 | CI332058 | CI508875 | BJ464572 | AV836536 |
| EB147295 | CN881681 | CI332058 | CI510146 | BJ464801 | AV923305 |

|          |          |          |          |          |          |
|----------|----------|----------|----------|----------|----------|
| EB147295 | CN907246 | CI332058 | CI512017 | BJ464805 | BJ472627 |
| EB147295 | CN919240 | CI332058 | CI515097 | BJ464913 | AV919492 |
| EB147295 | CN934605 | CI336456 | CI201916 | BJ465036 | BY839136 |
| EB147295 | CN936965 | CI336457 | CB685883 | BJ465038 | BY840615 |
| EB147295 | CN941534 | CI340033 | CB674604 | BJ465107 | BY843877 |
| EB147295 | CN941566 | CI340033 | CI071820 | BJ465136 | AV912888 |
| EB147295 | CN943728 | CI340033 | CI080713 | BJ465253 | AV914445 |
| EB147295 | CN946809 | CI340033 | CI562208 | BJ465325 | BJ467699 |
| EB147295 | CN947320 | CI343198 | AU163688 | BJ465444 | AV927343 |
| EB147295 | CN948638 | CI343198 | AU165633 | BJ465483 | AV912888 |
| EB147295 | CN948761 | CI344069 | CI355836 | BJ465898 | AV919492 |
| EB147295 | CN948805 | CI344540 | CI195732 | BJ466617 | AV916118 |
| EB147295 | EB148133 | CI344703 | CI434168 | BJ466691 | AV919492 |
| EB147295 | EB148180 | CI345093 | CI132390 | BJ466895 | AV914445 |
| EB147295 | EB148478 | CI345093 | CI134415 | BJ467418 | BJ462528 |
| EB147295 | EB148493 | CI345093 | CI181229 | BJ467522 | AV919492 |
| EB147295 | EB148759 | CI345093 | CI243837 | BJ467671 | BY869036 |
| EB147315 | EB148425 | CI346003 | CI355518 | BJ467898 | AV930182 |
| EB147385 | CN872381 | CI346862 | CI265010 | BJ468072 | AV914212 |
| EB147396 | CN873929 | CI346862 | CX728110 | BJ468469 | BY861308 |
| EB147396 | CN881681 | CI347758 | CI079875 | BJ468469 | BY866538 |
| EB147427 | CN873929 | CI349344 | CI211810 | BJ468695 | AV916118 |
| EB147427 | CN881681 | CI349653 | CI237332 | BJ468765 | BY845273 |
| EB147427 | EB148133 | CI349653 | CI516159 | BJ468957 | BJ469322 |
| EB147429 | EB177441 | CI350085 | CB684167 | BJ468957 | BJ471109 |
| EB147429 | EB177699 | CI350085 | CI462084 | BJ468957 | BJ472299 |
| EB147442 | EB148425 | CI352577 | CI551708 | BJ469007 | AV934216 |
| EB147458 | CN873929 | CI352745 | CB652875 | BJ469007 | AV936473 |
| EB147458 | CN907280 | CI353564 | CI217309 | BJ469007 | BJ470741 |
| EB147458 | CN907355 | CI356740 | CB665388 | BJ469007 | BJ470756 |
| EB147458 | CN948123 | CI358629 | CI369527 | BJ469007 | BJ475566 |
| EB147458 | EB148133 | CI359504 | CI132767 | BJ469092 | AV934216 |
| EB147458 | EB148180 | CI365967 | AU057653 | BJ469092 | AV935105 |
| EB147496 | CN907126 | CI365967 | CI507234 | BJ469092 | BJ470741 |
| EB147496 | CN907246 | CI369096 | CI007610 | BJ469130 | BJ470981 |
| EB147496 | CN919240 | CI369096 | CI529193 | BJ469130 | BJ473053 |
| EB147496 | CN930734 | CI369497 | CI366681 | BJ469130 | BJ475823 |
| EB147496 | CN939782 | CI371456 | CI557424 | BJ469130 | BJ477227 |
| EB147496 | CN948142 | CI376389 | CB668402 | BJ469241 | BJ547567 |
| EB147496 | EB147518 | CI380343 | CI045688 | BJ469241 | BJ548656 |
| EB147496 | EB148493 | CI380343 | CI146148 | BJ469309 | AV934216 |
| EB147496 | EB148665 | CI381942 | CI712002 | BJ469309 | AV936473 |
| EB147501 | CN878903 | CI382350 | CI672679 | BJ469309 | BJ475566 |
| EB147501 | CN879960 | CI383575 | CI145137 | BJ469346 | BJ471109 |
| EB147501 | CN906951 | CI387723 | CI044555 | BJ469407 | AV912985 |
| EB147501 | CN907126 | CI387723 | CI062004 | BJ469423 | BJ462678 |
| EB147501 | CN907350 | CI387723 | CI068235 | BJ469456 | AV934216 |
| EB147501 | CN907355 | CI387723 | CI071378 | BJ469456 | AV936473 |
| EB147501 | CN919240 | CI387723 | CI073721 | BJ469456 | BJ475566 |
| EB147501 | CN930709 | CI387723 | CI166318 | BJ469494 | BY867053 |
| EB147501 | CN931638 | CI387723 | CI215642 | BJ469561 | AV934216 |
| EB147501 | CN936965 | CI387723 | CI281059 | BJ469561 | AV935105 |

|          |          |          |          |          |          |
|----------|----------|----------|----------|----------|----------|
| EB147501 | CN940031 | CI387723 | CI346851 | BJ469561 | AV936473 |
| EB147501 | CN941534 | CI387723 | CI372038 | BJ469561 | BJ470741 |
| EB147501 | CN941566 | CI388350 | CI044795 | BJ469561 | BJ475566 |
| EB147501 | CN942034 | CI391306 | CI253602 | BJ469588 | AV932252 |
| EB147501 | CN943336 | CI391507 | CB674604 | BJ469717 | AV936473 |
| EB147501 | CN943728 | CI391507 | CI080713 | BJ469717 | BJ470741 |
| EB147501 | CN945200 | CI391507 | CI562208 | BJ469717 | BJ470756 |
| EB147501 | CN948142 | CI391764 | CI535515 | BJ469749 | BJ472627 |
| EB147501 | CN948761 | CI394739 | CI449737 | BJ469878 | AV934216 |
| EB147501 | CN948805 | CI395443 | CI518144 | BJ469878 | AV936473 |
| EB147501 | EB148180 | CI401754 | CI380238 | BJ469878 | BJ475566 |
| EB147501 | EB148478 | CI403767 | CI108221 | BJ469904 | AV914991 |
| EB147501 | EB149094 | CI403767 | CI204005 | BJ469904 | AV932042 |
| EB147504 | CN873929 | CI413172 | CI348877 | BJ469904 | AV933976 |
| EB147504 | CN881681 | CI414195 | CI202394 | BJ469904 | BJ470167 |
| EB147504 | CN907126 | CI419334 | CI165157 | BJ469904 | BJ471305 |
| EB147504 | CN907246 | CI419630 | CI148369 | BJ469904 | BJ472697 |
| EB147504 | CN907280 | CI420762 | CI253602 | BJ469904 | BJ473267 |
| EB147504 | CN907355 | CI422686 | CI718277 | BJ469904 | BY839320 |
| EB147504 | CN919240 | CI422686 | CI727847 | BJ469997 | BJ469132 |
| EB147504 | CN930734 | CI423941 | CI232236 | BJ469997 | BJ472887 |
| EB147504 | CN934605 | CI431601 | CI579192 | BJ470032 | AU089911 |
| EB147504 | CN939782 | CI438855 | CI375662 | BJ470032 | AV927513 |
| EB147504 | CN941566 | CI439718 | CI277586 | BJ470032 | AV930737 |
| EB147504 | CN942901 | CI441241 | CI010937 | BJ470032 | AV933703 |
| EB147504 | CN943538 | CI445634 | CI010937 | BJ470032 | AV934903 |
| EB147504 | CN943728 | CI446002 | CI237907 | BJ470032 | AV934993 |
| EB147504 | CN948123 | CI446506 | CB665170 | BJ470032 | AV935270 |
| EB147504 | CN948142 | CI446506 | CI095859 | BJ470032 | AV935304 |
| EB147504 | CN948638 | CI446506 | CI379589 | BJ470032 | AV935340 |
| EB147504 | EB147518 | CI447435 | CI418054 | BJ470032 | AV935538 |
| EB147504 | EB148133 | CI449480 | CI064885 | BJ470032 | AV935539 |
| EB147504 | EB148180 | CI449480 | CI371368 | BJ470032 | AV936121 |
| EB147504 | EB148478 | CI449625 | CI518144 | BJ470032 | AV936122 |
| EB147504 | EB148493 | CI451460 | CI518144 | BJ470032 | AV936140 |
| EB147504 | EB148665 | CI453557 | CI314953 | BJ470032 | AV936266 |
| EB147577 | EB147413 | CI453754 | CI202227 | BJ470032 | AV936751 |
| EB147615 | CN873929 | CI455783 | CI455225 | BJ470032 | AV937019 |
| EB147615 | CN907280 | CI455783 | CI456123 | BJ470032 | BJ470208 |
| EB147615 | CN930734 | CI455783 | CI456976 | BJ470032 | BJ470912 |
| EB147615 | CN948142 | CI455783 | CI458654 | BJ470032 | BJ473883 |
| EB147615 | EB147518 | CI455783 | CI459688 | BJ470032 | BJ474121 |
| EB147615 | EB148665 | CI455783 | CI459951 | BJ470032 | BJ474347 |
| EB147669 | EB149092 | CI455783 | CI460788 | BJ470032 | BJ475061 |
| EB147687 | CN939004 | CI455783 | CI461094 | BJ470032 | BJ475328 |
| EB147693 | CN857056 | CI455783 | CI463616 | BJ470032 | BJ475374 |
| EB147727 | EB149024 | CI455783 | CI468661 | BJ470032 | BJ475560 |
| EB147749 | EB147312 | CI455783 | CI468690 | BJ470032 | BJ475738 |
| EB147813 | CN857056 | CI455783 | CI469880 | BJ470032 | BJ476013 |
| EB147850 | CN939004 | CI455783 | CI469993 | BJ470032 | BJ476198 |
| EB147898 | CN879960 | CI455783 | CI470435 | BJ470032 | BJ476445 |
| EB147898 | CN919240 | CI455783 | CI473827 | BJ470032 | BJ476557 |

|          |          |          |          |          |          |
|----------|----------|----------|----------|----------|----------|
| EB147898 | CN936965 | CI455783 | CI476284 | BJ470032 | BJ477400 |
| EB147898 | CN940031 | CI455783 | CI476621 | BJ470032 | BJ477495 |
| EB147898 | CN941534 | CI455783 | CI477055 | BJ470032 | BY859057 |
| EB147898 | CN941566 | CI455783 | CI479096 | BJ470032 | BY862140 |
| EB147898 | CN948761 | CI455783 | CI479156 | BJ470042 | BJ469132 |
| EB147898 | CN948805 | CI455783 | CI479928 | BJ470042 | BJ471708 |
| EB147898 | EB148180 | CI455783 | CI480336 | BJ470042 | BJ472887 |
| EB147898 | EB148478 | CI455783 | CI480559 | BJ470055 | AV912985 |
| EB147898 | EB148759 | CI455783 | CI482533 | BJ470156 | AV933635 |
| EB147937 | EB135817 | CI455783 | CI482754 | BJ470156 | BJ469826 |
| EB147958 | CN902101 | CI455783 | CI482902 | BJ470156 | BJ472270 |
| EB147986 | EB146972 | CI455783 | CI484482 | BJ470156 | BJ472875 |
| EB148086 | EB147413 | CI455783 | CI486195 | BJ470215 | BJ475566 |
| EB148100 | EB147413 | CI455783 | CI490099 | BJ470257 | AV922687 |
| EB148100 | EB149092 | CI455783 | CI491217 | BJ470257 | BJ471351 |
| EB148120 | CN907153 | CI456741 | CI485014 | BJ470373 | BJ473315 |
| EB148120 | CN919342 | CI459456 | CI518144 | BJ470459 | AV934216 |
| EB148120 | EB147817 | CI460887 | CI210732 | BJ470459 | AV936473 |
| EB148136 | EB148003 | CI460887 | CI554433 | BJ470459 | BJ475566 |
| EB148144 | EB148450 | CI462262 | CI352261 | BJ470502 | AV930401 |
| EB148153 | EB147105 | CI464282 | CI485014 | BJ470617 | BJ547150 |
| EB148195 | EB148450 | CI464286 | CI518144 | BJ470617 | BJ547970 |
| EB148345 | EB148245 | CI465467 | CB673062 | BJ470677 | AU089967 |
| EB148345 | EB148696 | CI466100 | CB651962 | BJ470677 | AU090024 |
| EB148439 | EB146613 | CI466100 | CI408789 | BJ470677 | AV932232 |
| EB148448 | CN864163 | CI466100 | CI412414 | BJ470677 | AV932233 |
| EB148467 | CN894280 | CI466100 | CI452123 | BJ470677 | AV932532 |
| EB148470 | EB148425 | CI466645 | CI081179 | BJ470677 | AV932682 |
| EB148497 | CN873929 | CI468796 | CI380238 | BJ470677 | AV933083 |
| EB148497 | CN906951 | CI470135 | CI485014 | BJ470677 | AV935072 |
| EB148497 | CN907246 | CI470451 | CI518144 | BJ470677 | AV935073 |
| EB148497 | CN907350 | CI472495 | CI515282 | BJ470677 | AV936644 |
| EB148497 | CN907355 | CI473819 | AU181748 | BJ470677 | BJ471154 |
| EB148497 | CN945200 | CI473819 | CI018297 | BJ470677 | BJ471580 |
| EB148497 | CN948142 | CI473819 | CI019865 | BJ470677 | BJ471730 |
| EB148497 | CN948761 | CI473819 | CI026973 | BJ470677 | BJ471946 |
| EB148535 | CN873929 | CI473819 | CI027948 | BJ470677 | BJ473791 |
| EB148535 | CN907246 | CI473819 | CI054592 | BJ470677 | BJ474305 |
| EB148535 | CN907280 | CI473819 | CI057754 | BJ470677 | BJ477196 |
| EB148535 | CN907355 | CI473819 | CI061810 | BJ470727 | AV927019 |
| EB148535 | CN938978 | CI473819 | CI062573 | BJ470727 | AV930401 |
| EB148535 | CN948123 | CI473819 | CI063291 | BJ470748 | BJ546915 |
| EB148535 | EB148133 | CI473819 | CI174186 | BJ470748 | BJ547463 |
| EB148535 | EB148180 | CI473819 | CI174425 | BJ470827 | AV915262 |
| EB148632 | CN907126 | CI473819 | CI206610 | BJ470919 | BJ471492 |
| EB148632 | CN907280 | CI473819 | CI206930 | BJ470985 | AV934216 |
| EB148632 | CN919240 | CI473819 | CI209451 | BJ470985 | AV936473 |
| EB148632 | CN930734 | CI473819 | CI209816 | BJ471030 | AV915786 |
| EB148632 | CN948142 | CI473819 | CI210437 | BJ471278 | AV927019 |
| EB148632 | EB147518 | CI473819 | CI212457 | BJ471278 | AV930401 |
| EB148632 | EB148493 | CI473819 | CI237247 | BJ471325 | AV927801 |
| EB148632 | EB148665 | CI473819 | CI238268 | BJ471392 | AV930401 |



|          |          |          |          |          |          |
|----------|----------|----------|----------|----------|----------|
| EB148668 | CN888609 | CI473819 | CI239111 | BJ471553 | AV933453 |
| EB148695 | CN948761 | CI473819 | CI242049 | BJ471553 | BJ472683 |
| EB148695 | EB148180 | CI473819 | CI242465 | BJ471556 | BY871745 |
| EB148726 | CN864163 | CI473819 | CI281016 | BJ471713 | AU089967 |
| EB148737 | CN937785 | CI473819 | CI281495 | BJ471713 | AU090024 |
| EB148737 | CN939193 | CI473819 | CI282241 | BJ471713 | AV932233 |
| EB148737 | CN946950 | CI473819 | CI283218 | BJ471713 | AV932532 |
| EB148813 | EB147413 | CI473819 | CI375056 | BJ471713 | AV935072 |
| EB148829 | CN873929 | CI473819 | CI463038 | BJ471713 | AV935073 |
| EB148829 | CN881681 | CI473819 | CI487398 | BJ471713 | BJ471154 |
| EB148829 | CN948761 | CI473819 | CI659330 | BJ471713 | BJ471580 |
| EB148829 | EB148133 | CI473819 | CX728877 | BJ471713 | BJ471824 |
| EB148829 | EB148180 | CI474356 | CB668838 | BJ471713 | BJ471946 |
| EB148880 | CN876937 | CI474356 | CI402552 | BJ471713 | BJ473392 |
| EB148883 | CN874865 | CI480042 | CI546039 | BJ471713 | BJ473791 |
| EB148883 | CN878982 | CI484622 | CI211711 | BJ471713 | BJ474305 |
| EB148883 | CN904300 | CI484654 | CI688006 | BJ471713 | BJ477196 |
| EB148883 | CN904457 | CI484654 | CI688917 | BJ471769 | BJ546915 |
| EB148883 | CN905522 | CI484654 | CI689360 | BJ471769 | BJ547463 |
| EB148883 | CN905982 | CI484654 | CI689419 | BJ471820 | BJ547567 |
| EB148883 | CN906245 | CI484654 | CI689806 | BJ471820 | BJ548656 |
| EB148942 | CN919575 | CI484654 | CI691738 | BJ471875 | BJ473225 |
| EB148942 | CN919580 | CI484654 | CI692106 | BJ471971 | AV932831 |
| EB148942 | CN937200 | CI484654 | CI692341 | BJ471971 | AV933105 |
| EB148995 | EB151105 | CI484654 | CI692633 | BJ471971 | AV934208 |
| EB149015 | EB126729 | CI484654 | CI700886 | BJ471971 | BJ469890 |
| EB149069 | CN946869 | CI484654 | CI702130 | BJ471971 | BJ473173 |
| EB149155 | CN857056 | CI484654 | CI702477 | BJ472036 | BJ462678 |
| EB149177 | EB137843 | CI484654 | CI705043 | BJ472057 | BJ469152 |
| EB149187 | CN879563 | CI484654 | CI706506 | BJ472058 | BJ549953 |
| EB149187 | EB147119 | CI484654 | CI709932 | BJ472058 | BY867053 |
| EB149191 | CN907126 | CI484654 | CI710235 | BJ472094 | BJ469839 |
| EB149191 | CN907280 | CI484654 | CI710650 | BJ472353 | AV922687 |
| EB149191 | CN919240 | CI486618 | CI519476 | BJ472353 | BJ469890 |
| EB149191 | CN930734 | CI487621 | CI518144 | BJ472353 | BJ471351 |
| EB149191 | CN948142 | CI489084 | CI485014 | BJ472363 | AV932263 |
| EB149191 | EB147518 | CI489295 | CI515282 | BJ472363 | AV934216 |
| EB149191 | EB148493 | CI490500 | CI485014 | BJ472363 | AV935105 |
| EB149191 | EB148665 | CI491470 | CI449894 | BJ472363 | AV936473 |
| EB149234 | EB147255 | CI491470 | CI505162 | BJ472363 | BJ470741 |
| EB149247 | EB126729 | CI491470 | CI547489 | BJ472363 | BJ475566 |
| EB149335 | EB147105 | CI491483 | CB677204 | BJ472455 | AV932188 |
| EB149400 | CN879176 | CI491747 | CI106662 | BJ472455 | BJ469701 |
| EB149421 | EB150864 | CI492779 | CI535767 | BJ472470 | AV935452 |
| EB149523 | CN901960 | CI494725 | CI062335 | BJ472470 | BJ476193 |
| EB149583 | CN859674 | CI494725 | CI163155 | BJ472501 | AV935452 |
| EB149612 | EB147105 | CI494725 | CI204019 | BJ472501 | BJ473567 |
| EB149689 | EB110059 | CI494725 | CI262207 | BJ472501 | BJ476193 |
| EB149705 | CN907126 | CI494960 | CX728618 | BJ472518 | BJ546915 |
| EB149705 | CN907246 | CI496106 | CB684254 | BJ472518 | BJ547463 |
| EB149705 | CN907280 | CI499556 | CI515282 | BJ472530 | AV934216 |
| EB149705 | CN919240 | CI499729 | CI267551 | BJ472530 | AV935105 |

|          |          |          |          |          |          |
|----------|----------|----------|----------|----------|----------|
| EB149705 | CN930734 | CI499744 | CI317179 | BJ472530 | BJ470741 |
| EB149705 | CN939782 | CI499744 | CI525350 | BJ472530 | BJ475566 |
| EB149705 | CN948142 | CI501554 | CB684254 | BJ472815 | AV927924 |
| EB149705 | EB147518 | CI504627 | CI515282 | BJ472815 | AV928352 |
| EB149705 | EB148493 | CI504995 | CI013614 | BJ472815 | AV929500 |
| EB149705 | EB148665 | CI504995 | CI349761 | BJ472815 | AV932491 |
| EB149782 | CN873929 | CI505222 | CI549969 | BJ472815 | AV932793 |
| EB149782 | CN907246 | CI506333 | CI029120 | BJ472815 | AV933898 |
| EB149782 | CN907280 | CI509462 | CI395195 | BJ472815 | AV935188 |
| EB149782 | CN907355 | CI509658 | CI549969 | BJ472815 | AV935340 |
| EB149782 | CN930734 | CI517493 | CI335673 | BJ472815 | AV935410 |
| EB149782 | CN938978 | CI517493 | CI477813 | BJ472815 | AV935494 |
| EB149782 | CN948123 | CI524456 | CI396164 | BJ472815 | AV935539 |
| EB149782 | CN948142 | CI524714 | CI439231 | BJ472815 | AV935630 |
| EB149782 | EB147518 | CI526482 | CB660364 | BJ472815 | AV935738 |
| EB149782 | EB148133 | CI526482 | CB663618 | BJ472815 | AV935823 |
| EB149782 | EB148180 | CI526482 | CB667374 | BJ472815 | AV936074 |
| EB149782 | EB148665 | CI526482 | CI463449 | BJ472815 | AV936136 |
| EB149797 | EB157423 | CI526482 | CI515097 | BJ472815 | AV936345 |
| EB149803 | EB149092 | CI531732 | CI353299 | BJ472815 | AV936418 |
| EB149866 | EB150864 | CI532466 | CI314285 | BJ472815 | AV936453 |
| EB150020 | CN893010 | CI538377 | CB671135 | BJ472815 | AV936688 |
| EB150022 | CN873929 | CI539508 | AU095434 | BJ472815 | AV936751 |
| EB150022 | CN881681 | CI539508 | CI761038 | BJ472815 | AV936757 |
| EB150022 | CN907246 | CI544635 | CI262281 | BJ472815 | AV936763 |
| EB150022 | CN907280 | CI546357 | CI262281 | BJ472815 | AV936797 |
| EB150022 | CN930734 | CI556652 | CI421842 | BJ472815 | AV936939 |
| EB150022 | CN948142 | CI557142 | CI718722 | BJ472815 | AV937076 |
| EB150022 | EB147518 | CI557142 | CI725052 | BJ472815 | AV937209 |
| EB150022 | EB148133 | CI559753 | CI132767 | BJ472815 | BJ472797 |
| EB150022 | EB148665 | CI563610 | CB670077 | BJ472815 | BJ473511 |
| EB150036 | CN881681 | CI563839 | CI618343 | BJ472815 | BJ473798 |
| EB150036 | EB148133 | CI564523 | CI570859 | BJ472815 | BJ473908 |
| EB150038 | CN902101 | CI564523 | CI645149 | BJ472815 | BJ474094 |
| EB150085 | EB116445 | CI564523 | CI755379 | BJ472815 | BJ474123 |
| EB150085 | EB117553 | CI566351 | CI570891 | BJ472815 | BJ474193 |
| EB150085 | EB143798 | CI566351 | CI579880 | BJ472815 | BJ474409 |
| EB150085 | EB144290 | CI567132 | CI628764 | BJ472815 | BJ474578 |
| EB150085 | EB144442 | CI567786 | CB672675 | BJ472815 | BJ474738 |
| EB150085 | EB144463 | CI567918 | CI566554 | BJ472815 | BJ474777 |
| EB150085 | EB144725 | CI568487 | CI683374 | BJ472815 | BJ474995 |
| EB150085 | EB146044 | CI568563 | CI667939 | BJ472815 | BJ475188 |
| EB150085 | EB146129 | CI569405 | CI733848 | BJ472815 | BJ475234 |
| EB150085 | EB149562 | CI569975 | CI768717 | BJ472815 | BJ475362 |
| EB150085 | EB150185 | CI570211 | CI566489 | BJ472815 | BJ475374 |
| EB150085 | EB152955 | CI570211 | CI687410 | BJ472815 | BJ475560 |
| EB150085 | EB157250 | CI570282 | CI291082 | BJ472815 | BJ475699 |
| EB150085 | EB176846 | CI570485 | CI748125 | BJ472815 | BJ475988 |
| EB150103 | CN873929 | CI570734 | CI632024 | BJ472815 | BJ476099 |
| EB150103 | CN907280 | CI570734 | CI645149 | BJ472815 | BJ476125 |
| EB150103 | CN907355 | CI571954 | CI589102 | BJ472815 | BJ476133 |
| EB150103 | CN948123 | CI573468 | CI219096 | BJ472815 | BJ476319 |

|          |          |          |          |          |          |
|----------|----------|----------|----------|----------|----------|
| EB150103 | EB148133 | CI573515 | CI667939 | BJ472815 | BJ476557 |
| EB150103 | EB148180 | CI574015 | CI566300 | BJ472815 | BJ476963 |
| EB150209 | CN864163 | CI574949 | CI740499 | BJ472815 | BJ477490 |
| EB150215 | EB148450 | CI576308 | CI566300 | BJ472815 | BJ477532 |
| EB150260 | EB176363 | CI576536 | CI611734 | BJ472841 | BJ472260 |
| EB150274 | EB149024 | CI576536 | CI674350 | BJ472845 | BJ547261 |
| EB150298 | CN873929 | CI577898 | CI601735 | BJ472845 | BJ547567 |
| EB150298 | CN907126 | CI578145 | CI647294 | BJ472845 | BJ547657 |
| EB150298 | CN907246 | CI578648 | CB645424 | BJ472880 | BJ546915 |
| EB150298 | CN907355 | CI581048 | CI574011 | BJ472880 | BJ547463 |
| EB150298 | CN919240 | CI582112 | CI632024 | BJ472923 | BY845523 |
| EB150298 | CN930734 | CI582112 | CI645149 | BJ472928 | AV922687 |
| EB150298 | CN939782 | CI583221 | CI027845 | BJ472928 | BJ471351 |
| EB150298 | CN942901 | CI583221 | CI331229 | BJ473104 | AV927019 |
| EB150298 | CN943538 | CI583225 | CI655837 | BJ473104 | AV930401 |
| EB150298 | CN948123 | CI583852 | CI577952 | BJ473166 | AV915786 |
| EB150298 | CN948142 | CI584048 | CI571468 | BJ473428 | AV925248 |
| EB150298 | EB147518 | CI584067 | CI775188 | BJ473428 | AV927019 |
| EB150298 | EB148133 | CI584112 | CI578804 | BJ473428 | AV930401 |
| EB150298 | EB148180 | CI584231 | CI604665 | BJ473432 | AV934216 |
| EB150298 | EB148493 | CI584515 | CI620018 | BJ473432 | AV936473 |
| EB150298 | EB148665 | CI584857 | CB653574 | BJ473451 | AV927924 |
| EB150304 | CN873929 | CI585127 | CB676419 | BJ473451 | AV928352 |
| EB150304 | CN907246 | CI585369 | CI656940 | BJ473451 | AV929500 |
| EB150304 | CN907280 | CI586892 | CI581838 | BJ473451 | AV932491 |
| EB150304 | CN907355 | CI586892 | CI582841 | BJ473451 | AV932793 |
| EB150304 | CN930734 | CI587359 | CI566300 | BJ473451 | AV933898 |
| EB150304 | CN948123 | CI587737 | CI769088 | BJ473451 | AV935188 |
| EB150304 | CN948142 | CI589031 | CI515282 | BJ473451 | AV935340 |
| EB150304 | EB147518 | CI590338 | CB641566 | BJ473451 | AV935410 |
| EB150304 | EB148133 | CI590338 | CI692576 | BJ473451 | AV935494 |
| EB150304 | EB148180 | CI591263 | CI564044 | BJ473451 | AV935539 |
| EB150304 | EB148665 | CI592436 | CI619606 | BJ473451 | AV935630 |
| EB150320 | EB134740 | CI593664 | CI564180 | BJ473451 | AV935738 |
| EB150320 | EB136044 | CI593664 | CI589509 | BJ473451 | AV935823 |
| EB150322 | EB148425 | CI593664 | CI741317 | BJ473451 | AV936074 |
| EB150328 | CN864163 | CI593685 | CI775401 | BJ473451 | AV936136 |
| EB150347 | EB147413 | CI595045 | CI609145 | BJ473451 | AV936345 |
| EB150349 | CN873929 | CI596248 | CI775077 | BJ473451 | AV936418 |
| EB150349 | CN906951 | CI596374 | CI616837 | BJ473451 | AV936453 |
| EB150349 | CN907246 | CI596958 | CB668592 | BJ473451 | AV936688 |
| EB150349 | CN907350 | CI597048 | CI748804 | BJ473451 | AV936751 |
| EB150349 | CN907355 | CI598863 | CB653574 | BJ473451 | AV936757 |
| EB150349 | CN938978 | CI599288 | CI732555 | BJ473451 | AV936763 |
| EB150349 | CN945200 | CI600436 | CI611734 | BJ473451 | AV936797 |
| EB150349 | CN948142 | CI600436 | CI674350 | BJ473451 | AV936939 |
| EB150349 | CN948761 | CI600579 | CI743573 | BJ473451 | AV937076 |
| EB150372 | CN871529 | CI601540 | CI595828 | BJ473451 | AV937209 |
| EB150376 | CN873929 | CI601565 | CI655837 | BJ473451 | BJ472797 |
| EB150376 | CN879960 | CI604077 | CB645424 | BJ473451 | BJ473511 |
| EB150376 | CN881681 | CI604140 | CI678645 | BJ473451 | BJ473798 |
| EB150376 | CN907126 | CI605093 | CI582665 | BJ473451 | BJ473908 |

|          |          |          |          |          |          |
|----------|----------|----------|----------|----------|----------|
| EB150376 | CN907246 | CI605093 | CI604953 | BJ473451 | BJ474094 |
| EB150376 | CN907280 | CI605177 | CB655028 | BJ473451 | BJ474123 |
| EB150376 | CN919240 | CI609969 | CI320000 | BJ473451 | BJ474193 |
| EB150376 | CN930734 | CI612910 | CI587207 | BJ473451 | BJ474409 |
| EB150376 | CN934605 | CI613791 | CI564044 | BJ473451 | BJ474578 |
| EB150376 | CN936965 | CI614767 | CB652704 | BJ473451 | BJ474738 |
| EB150376 | CN939782 | CI615000 | CI308066 | BJ473451 | BJ474777 |
| EB150376 | CN940031 | CI615000 | CI571347 | BJ473451 | BJ474995 |
| EB150376 | CN941534 | CI615798 | CI689717 | BJ473451 | BJ475188 |
| EB150376 | CN941566 | CI616275 | CI581762 | BJ473451 | BJ475234 |
| EB150376 | CN943728 | CI618331 | CI748125 | BJ473451 | BJ475362 |
| EB150376 | CN948142 | CI619728 | CI778111 | BJ473451 | BJ475374 |
| EB150376 | CN948638 | CI620393 | CI611734 | BJ473451 | BJ475560 |
| EB150376 | CN948761 | CI620393 | CI674350 | BJ473451 | BJ475699 |
| EB150376 | CN948805 | CI620729 | CI624804 | BJ473451 | BJ475988 |
| EB150376 | EB147518 | CI620729 | CI737848 | BJ473451 | BJ476099 |
| EB150376 | EB148133 | CI620729 | CI738589 | BJ473451 | BJ476125 |
| EB150376 | EB148180 | CI620729 | CI741047 | BJ473451 | BJ476133 |
| EB150376 | EB148478 | CI620729 | CI755037 | BJ473451 | BJ476319 |
| EB150376 | EB148493 | CI620729 | CI762191 | BJ473451 | BJ476557 |
| EB150376 | EB148665 | CI620729 | CI763335 | BJ473451 | BJ476763 |
| EB150376 | EB148759 | CI622347 | CI594208 | BJ473451 | BJ476963 |
| EB150427 | EB147413 | CI622384 | CB648016 | BJ473451 | BJ477490 |
| EB150464 | EB147255 | CI622384 | CI576232 | BJ473451 | BJ477532 |
| EB150483 | CN907126 | CI624689 | CI661652 | BJ473453 | AV927019 |
| EB150483 | CN907246 | CI624690 | CI679532 | BJ473453 | AV930401 |
| EB150483 | CN907280 | CI624690 | CI683086 | BJ473553 | AV925248 |
| EB150483 | CN907355 | CI625429 | CI630747 | BJ473553 | AV927019 |
| EB150483 | CN919240 | CI627431 | CI748125 | BJ473553 | AV930401 |
| EB150483 | CN930734 | CI629690 | CI578078 | BJ473560 | AV920113 |
| EB150483 | CN934605 | CI629690 | CI594733 | BJ473560 | AV927513 |
| EB150483 | CN938978 | CI630153 | C91615   | BJ473560 | AV928957 |
| EB150483 | CN939782 | CI630310 | CI584491 | BJ473560 | AV929591 |
| EB150483 | CN940031 | CI630528 | CI684202 | BJ473560 | AV930737 |
| EB150483 | CN941534 | CI630914 | CI602621 | BJ473560 | AV931515 |
| EB150483 | CN942901 | CI630914 | CI751694 | BJ473560 | AV934234 |
| EB150483 | CN943538 | CI632278 | CI773547 | BJ473560 | AV934655 |
| EB150483 | CN946809 | CI632608 | CI654800 | BJ473560 | AV934681 |
| EB150483 | CN947320 | CI633535 | CI655837 | BJ473560 | AV934928 |
| EB150483 | CN948123 | CI635360 | CI654800 | BJ473560 | AV934978 |
| EB150483 | CN948142 | CI636076 | CI606042 | BJ473560 | AV935100 |
| EB150483 | EB147518 | CI636285 | CI665945 | BJ473560 | AV935188 |
| EB150483 | EB148133 | CI636377 | CI655837 | BJ473560 | AV935410 |
| EB150483 | EB148180 | CI638452 | CI654800 | BJ473560 | AV935492 |
| EB150483 | EB148493 | CI638592 | CI654800 | BJ473560 | AV935494 |
| EB150483 | EB148665 | CI639749 | CI567302 | BJ473560 | AV935523 |
| EB150485 | CN873929 | CI639987 | CI654800 | BJ473560 | AV935539 |
| EB150485 | CN879960 | CI640520 | CI655837 | BJ473560 | AV935681 |
| EB150485 | CN881681 | CI640821 | CI305183 | BJ473560 | AV935823 |
| EB150485 | CN907126 | CI641283 | CB685632 | BJ473560 | AV935842 |
| EB150485 | CN907246 | CI641421 | CI689303 | BJ473560 | AV935878 |
| EB150485 | CN919240 | CI641959 | CI633499 | BJ473560 | AV936029 |

|          |          |          |          |          |          |
|----------|----------|----------|----------|----------|----------|
| EB150485 | CN930734 | CI642499 | CI681560 | BJ473560 | AV936084 |
| EB150485 | CN931638 | CI644968 | CI662999 | BJ473560 | AV936222 |
| EB150485 | CN934605 | CI645913 | CI655837 | BJ473560 | AV936266 |
| EB150485 | CN936965 | CI645926 | CI778111 | BJ473560 | AV936454 |
| EB150485 | CN939782 | CI645931 | CI639185 | BJ473560 | AV936475 |
| EB150485 | CN940031 | CI647733 | CI646844 | BJ473560 | AV936489 |
| EB150485 | CN941534 | CI648253 | CI294949 | BJ473560 | AV936689 |
| EB150485 | CN941566 | CI648253 | CI591460 | BJ473560 | AV936763 |
| EB150485 | CN943728 | CI648698 | CI655837 | BJ473560 | AV937135 |
| EB150485 | CN946809 | CI649333 | CI655837 | BJ473560 | BJ469485 |
| EB150485 | CN947320 | CI649558 | CI672679 | BJ473560 | BJ471501 |
| EB150485 | CN948142 | CI650418 | CI305183 | BJ473560 | BJ473492 |
| EB150485 | CN948638 | CI651256 | CI771545 | BJ473560 | BJ473589 |
| EB150485 | CN948761 | CI651367 | CI655837 | BJ473560 | BJ473699 |
| EB150485 | CN948805 | CI651741 | CB685632 | BJ473560 | BJ473805 |
| EB150485 | EB147518 | CI652608 | CI654800 | BJ473560 | BJ473820 |
| EB150485 | EB148133 | CI653282 | CI778111 | BJ473560 | BJ473871 |
| EB150485 | EB148180 | CI653872 | CI639773 | BJ473560 | BJ474123 |
| EB150485 | EB148478 | CI654774 | CI584362 | BJ473560 | BJ474193 |
| EB150485 | EB148493 | CI654939 | CI656940 | BJ473560 | BJ474496 |
| EB150485 | EB148665 | CI655489 | C19323   | BJ473560 | BJ474736 |
| EB150508 | CN943930 | CI655489 | CI620385 | BJ473560 | BJ474777 |
| EB150545 | CN873929 | CI655489 | CI682254 | BJ473560 | BJ474953 |
| EB150545 | CN907126 | CI656097 | CI305183 | BJ473560 | BJ474995 |
| EB150545 | CN907246 | CI657416 | CB685632 | BJ473560 | BJ475061 |
| EB150545 | CN907355 | CI657453 | CI655837 | BJ473560 | BJ475152 |
| EB150545 | CN919240 | CI657599 | CI655837 | BJ473560 | BJ475188 |
| EB150545 | CN934605 | CI657602 | CB664650 | BJ473560 | BJ475234 |
| EB150545 | CN939782 | CI658497 | CB685632 | BJ473560 | BJ475328 |
| EB150545 | CN941534 | CI658548 | CI032367 | BJ473560 | BJ475398 |
| EB150545 | CN942901 | CI659758 | CI667827 | BJ473560 | BJ475491 |
| EB150545 | CN943538 | CI661784 | CI721306 | BJ473560 | BJ475627 |
| EB150545 | CN946809 | CI662839 | CI255384 | BJ473560 | BJ475699 |
| EB150545 | CN947320 | CI662959 | CI655837 | BJ473560 | BJ475738 |
| EB150545 | CN948123 | CI663282 | CI765750 | BJ473560 | BJ475988 |
| EB150545 | EB148133 | CI666603 | CI578419 | BJ473560 | BJ476013 |
| EB150545 | EB148180 | CI666730 | CI681560 | BJ473560 | BJ476140 |
| EB150564 | EB137036 | CI667069 | CI661011 | BJ473560 | BJ476319 |
| EB150564 | EB177203 | CI667093 | CI169832 | BJ473560 | BJ476572 |
| EB150564 | EB177619 | CI667093 | CI242011 | BJ473560 | BJ476763 |
| EB150587 | CN873929 | CI667093 | CI284249 | BJ473560 | BJ476815 |
| EB150587 | CN907280 | CI667132 | CB646138 | BJ473560 | BJ476851 |
| EB150587 | CN907355 | CI667578 | CI684438 | BJ473560 | BJ477400 |
| EB150587 | CN948123 | CI668070 | CI515282 | BJ473560 | BJ477490 |
| EB150587 | EB148133 | CI668130 | CI773506 | BJ473560 | BJ477533 |
| EB150587 | EB148180 | CI670800 | CA754482 | BJ473560 | BY862140 |
| EB150593 | CN907153 | CI673014 | CI686917 | BJ473599 | AV920113 |
| EB150593 | CN919342 | CI673276 | CI662999 | BJ473599 | AV927513 |
| EB150593 | EB147817 | CI677057 | CB652746 | BJ473599 | AV928957 |
| EB150594 | CN941543 | CI677780 | CI449175 | BJ473599 | AV929591 |
| EB150641 | CN879960 | CI677780 | CI450457 | BJ473599 | AV930737 |
| EB150641 | CN919240 | CI677780 | CI451670 | BJ473599 | AV931515 |

|          |          |          |          |          |          |
|----------|----------|----------|----------|----------|----------|
| EB150641 | CN936965 | CI677780 | CI452979 | BJ473599 | AV932555 |
| EB150641 | CN941534 | CI677780 | CI453046 | BJ473599 | AV933703 |
| EB150641 | CN941566 | CI677780 | CI454520 | BJ473599 | AV934234 |
| EB150641 | CN948761 | CI677780 | CI454754 | BJ473599 | AV934655 |
| EB150641 | CN948805 | CI677780 | CI455010 | BJ473599 | AV934660 |
| EB150641 | EB148180 | CI677780 | CI455719 | BJ473599 | AV934681 |
| EB150641 | EB148478 | CI677780 | CI455928 | BJ473599 | AV934857 |
| EB150641 | EB148759 | CI677780 | CI457250 | BJ473599 | AV934928 |
| EB150648 | EB148062 | CI677780 | CI463024 | BJ473599 | AV934978 |
| EB150660 | CN879960 | CI677780 | CI463597 | BJ473599 | AV935100 |
| EB150660 | CN919240 | CI677780 | CI464846 | BJ473599 | AV935155 |
| EB150660 | CN936965 | CI677780 | CI467642 | BJ473599 | AV935188 |
| EB150660 | CN940031 | CI677780 | CI471434 | BJ473599 | AV935222 |
| EB150660 | CN941534 | CI677780 | CI472866 | BJ473599 | AV935304 |
| EB150660 | CN941566 | CI677780 | CI474711 | BJ473599 | AV935410 |
| EB150660 | CN948761 | CI677780 | CI482076 | BJ473599 | AV935435 |
| EB150660 | CN948805 | CI677780 | CI483986 | BJ473599 | AV935492 |
| EB150660 | EB148180 | CI677780 | CI490123 | BJ473599 | AV935494 |
| EB150660 | EB148478 | CI677837 | CI585262 | BJ473599 | AV935523 |
| EB150660 | EB148759 | CI677837 | CI587019 | BJ473599 | AV935531 |
| EB150669 | EB149092 | CI677837 | CI610029 | BJ473599 | AV935539 |
| EB150676 | CN919575 | CI678704 | CI584861 | BJ473599 | AV935663 |
| EB150676 | CN919580 | CI678828 | CB673058 | BJ473599 | AV935681 |
| EB150676 | CN937200 | CI680349 | CB642385 | BJ473599 | AV935738 |
| EB150683 | CN907126 | CI681953 | CI399438 | BJ473599 | AV935823 |
| EB150683 | CN907280 | CI682941 | CB668637 | BJ473599 | AV935842 |
| EB150683 | CN907355 | CI682980 | CB675408 | BJ473599 | AV935878 |
| EB150683 | CN939782 | CI683942 | CI616601 | BJ473599 | AV935879 |
| EB150683 | CN942901 | CI685502 | CI716044 | BJ473599 | AV936029 |
| EB150683 | CN943538 | CI685686 | CI655837 | BJ473599 | AV936084 |
| EB150683 | CN948123 | CI686833 | CA753941 | BJ473599 | AV936113 |
| EB150683 | EB148133 | CI687850 | AU166591 | BJ473599 | AV936211 |
| EB150683 | EB148180 | CI687850 | CI110994 | BJ473599 | AV936222 |
| EB150684 | CN873929 | CI687850 | CI111853 | BJ473599 | AV936266 |
| EB150684 | CN907126 | CI687850 | CI360915 | BJ473599 | AV936345 |
| EB150684 | CN907280 | CI689844 | CI655837 | BJ473599 | AV936411 |
| EB150684 | CN907355 | CI692485 | CI605901 | BJ473599 | AV936448 |
| EB150684 | CN939782 | CI693083 | CI711183 | BJ473599 | AV936454 |
| EB150684 | CN942901 | CI693832 | CI651578 | BJ473599 | AV936475 |
| EB150684 | CN943538 | CI694100 | CB678245 | BJ473599 | AV936489 |
| EB150684 | CN948123 | CI694197 | CB649157 | BJ473599 | AV936689 |
| EB150684 | EB148133 | CI695205 | CB647772 | BJ473599 | AV936763 |
| EB150684 | EB148180 | CI695434 | CI673362 | BJ473599 | AV936774 |
| EB150696 | CN873929 | CI695434 | CI676137 | BJ473599 | AV936797 |
| EB150696 | CN881681 | CI695434 | CI683000 | BJ473599 | AV936939 |
| EB150718 | EB127480 | CI695434 | CI683396 | BJ473599 | AV937019 |
| EB150718 | EB175396 | CI695434 | CI683622 | BJ473599 | AV937135 |
| EB150718 | EB175733 | CI695434 | CI687920 | BJ473599 | BJ469485 |
| EB150990 | EB148450 | CI695434 | CI687937 | BJ473599 | BJ471501 |
| EB151009 | EB143757 | CI695434 | CI690708 | BJ473599 | BJ471598 |
| EB151027 | CN879960 | CI695434 | CI692211 | BJ473599 | BJ473492 |
| EB151027 | CN881681 | CI695434 | CI693712 | BJ473599 | BJ473589 |

|          |          |          |          |          |          |
|----------|----------|----------|----------|----------|----------|
| EB151027 | CN919240 | CI695434 | CI694869 | BJ473599 | BJ473699 |
| EB151027 | CN934605 | CI695434 | CI697403 | BJ473599 | BJ473798 |
| EB151027 | CN936965 | CI695434 | CI700446 | BJ473599 | BJ473805 |
| EB151027 | CN940031 | CI695434 | CI700707 | BJ473599 | BJ473820 |
| EB151027 | CN941534 | CI695798 | CI769337 | BJ473599 | BJ473871 |
| EB151027 | CN941566 | CI696810 | CI686377 | BJ473599 | BJ473908 |
| EB151027 | CN943728 | CI696810 | CI688353 | BJ473599 | BJ474123 |
| EB151027 | CN948638 | CI696810 | CI699745 | BJ473599 | BJ474193 |
| EB151027 | CN948761 | CI696810 | CI700243 | BJ473599 | BJ474377 |
| EB151027 | CN948805 | CI696810 | CI702130 | BJ473599 | BJ474424 |
| EB151027 | EB148133 | CI696810 | CI702498 | BJ473599 | BJ474578 |
| EB151027 | EB148180 | CI696810 | CI703036 | BJ473599 | BJ474736 |
| EB151027 | EB148478 | CI696810 | CI703530 | BJ473599 | BJ474777 |
| EB151027 | EB148493 | CI696810 | CI708752 | BJ473599 | BJ474995 |
| EB151027 | EB148759 | CI696810 | CI709166 | BJ473599 | BJ475061 |
| EB151047 | EB147014 | CI697592 | CI651578 | BJ473599 | BJ475152 |
| EB151089 | EB137928 | CI697842 | CI569327 | BJ473599 | BJ475188 |
| EB151091 | EB148425 | CI697842 | CI660438 | BJ473599 | BJ475234 |
| EB151135 | CN948761 | CI697842 | CI663666 | BJ473599 | BJ475328 |
| EB151135 | EB148180 | CI701998 | CI666783 | BJ473599 | BJ475374 |
| EB151158 | CN849639 | CI702724 | CI639185 | BJ473599 | BJ475377 |
| EB151158 | CN907463 | CI703326 | CI686917 | BJ473599 | BJ475396 |
| EB151158 | EB147817 | CI705591 | CI748125 | BJ473599 | BJ475398 |
| EB151163 | EB147119 | CI705841 | CI660033 | BJ473599 | BJ475491 |
| EB151212 | CN849073 | CI706885 | CI753942 | BJ473599 | BJ475627 |
| EB152971 | CN873929 | CI707789 | CI676014 | BJ473599 | BJ475699 |
| EB152971 | CN907126 | CI708604 | CI642830 | BJ473599 | BJ475738 |
| EB152971 | CN934605 | CI708924 | CI748125 | BJ473599 | BJ475968 |
| EB152971 | CN941566 | CI710578 | CI482508 | BJ473599 | BJ475988 |
| EB152971 | CN942901 | CI710578 | CI488182 | BJ473599 | BJ476013 |
| EB152971 | CN943538 | CI710578 | CI680946 | BJ473599 | BJ476123 |
| EB152971 | CN943728 | CI710578 | CI682353 | BJ473599 | BJ476236 |
| EB152971 | CN948123 | CI710754 | CI637421 | BJ473599 | BJ476265 |
| EB152971 | CN948638 | CI710824 | CI741775 | BJ473599 | BJ476319 |
| EB152971 | EB148478 | CI711882 | CB685632 | BJ473599 | BJ476481 |
| EB152971 | EB148493 | CI713339 | C73380   | BJ473599 | BJ476557 |
| EB152976 | CN930734 | CI713339 | CI682787 | BJ473599 | BJ476572 |
| EB152976 | CN948142 | CI713343 | CI308066 | BJ473599 | BJ476815 |
| EB152976 | CN948761 | CI713343 | CI571347 | BJ473599 | BJ476851 |
| EB152976 | EB147518 | CI713774 | CB668485 | BJ473599 | BJ476959 |
| EB152990 | CN873929 | CI715788 | CB668485 | BJ473599 | BJ477237 |
| EB152990 | CN907350 | CI715902 | CI687042 | BJ473599 | BJ477400 |
| EB152990 | CN938978 | CI716127 | CI672679 | BJ473599 | BJ477450 |
| EB152990 | CN945200 | CI716598 | CI676014 | BJ473599 | BJ477490 |
| EB152990 | CN948142 | CI719055 | CB685632 | BJ473599 | BJ477495 |
| EB152990 | CN948761 | CI719187 | CI483264 | BJ473599 | BJ477533 |
| EB153071 | EB122385 | CI721467 | CB671135 | BJ473599 | BY859113 |
| EB153081 | EB106104 | CI722879 | CI672679 | BJ473599 | BY862140 |
| EB153081 | EB128974 | CI723116 | CI660655 | BJ473897 | AV930401 |
| EB153101 | EB149841 | CI724328 | CI308066 | BJ473920 | AV927924 |
| EB153121 | CN873929 | CI724328 | CI571347 | BJ473920 | AV928352 |
| EB153121 | CN907280 | CI724779 | C73380   | BJ473920 | AV929500 |

|          |          |          |          |          |          |
|----------|----------|----------|----------|----------|----------|
| EB153121 | CN907355 | CI724779 | CI682787 | BJ473920 | AV932491 |
| EB153121 | CN948123 | CI729889 | CI672679 | BJ473920 | AV932793 |
| EB153121 | EB148133 | CI730000 | CB653645 | BJ473920 | AV933898 |
| EB153121 | EB148180 | CI730000 | CI676394 | BJ473920 | AV935188 |
| EB156980 | CN864163 | CI732798 | CI642830 | BJ473920 | AV935340 |
| EB157110 | EB124866 | CI733876 | CI584861 | BJ473920 | AV935410 |
| EB157167 | EB128974 | CI734519 | CI655837 | BJ473920 | AV935494 |
| EB157232 | EB148274 | CI736095 | CI062148 | BJ473920 | AV935539 |
| EB157258 | CN864163 | CI736217 | CI748125 | BJ473920 | AV935630 |
| EB157296 | EB137187 | CI736555 | CI581045 | BJ473920 | AV935738 |
| EB157296 | EB138349 | CI736719 | CB642385 | BJ473920 | AV935823 |
| EB157296 | EB144677 | CI736945 | CB639086 | BJ473920 | AV936074 |
| EB157430 | EB110059 | CI736945 | CI756196 | BJ473920 | AV936136 |
| EB157509 | CN864163 | CI739351 | CI609145 | BJ473920 | AV936345 |
| EB157539 | EB147196 | CI740120 | CI684438 | BJ473920 | AV936418 |
| EB175265 | EB131266 | CI741230 | CI643530 | BJ473920 | AV936453 |
| EB175268 | EB132427 | CI742050 | CI611734 | BJ473920 | AV936688 |
| EB175278 | CN904291 | CI742050 | CI674350 | BJ473920 | AV936751 |
| EB175280 | CN864163 | CI742190 | CI579577 | BJ473920 | AV936757 |
| EB175313 | CN864163 | CI742882 | CB673058 | BJ473920 | AV936763 |
| EB175360 | EB110059 | CI748966 | CI615473 | BJ473920 | AV936797 |
| EB175405 | EG631304 | CI749304 | CI745251 | BJ473920 | AV936939 |
| EB175582 | CN864163 | CI749556 | CI748804 | BJ473920 | AV937076 |
| EB175722 | EB127651 | CI749786 | CB642592 | BJ473920 | AV937209 |
| EB175722 | EB130252 | CI751558 | CI607765 | BJ473920 | BJ472797 |
| EB175722 | EB135131 | CI751558 | CI704043 | BJ473920 | BJ473511 |
| EB175722 | EB136504 | CI753899 | CI595177 | BJ473920 | BJ473798 |
| EB175722 | EB143200 | CI753899 | CI614160 | BJ473920 | BJ473908 |
| EB175722 | EB143818 | CI754543 | CI605402 | BJ473920 | BJ474094 |
| EB175722 | EB143884 | CI755195 | CI566353 | BJ473920 | BJ474123 |
| EB175722 | EB144160 | CI755917 | CB664650 | BJ473920 | BJ474193 |
| EB175722 | EB175293 | CI756274 | D40795   | BJ473920 | BJ474409 |
| EB175722 | EB175400 | CI758735 | CI663432 | BJ473920 | BJ474578 |
| EB175722 | EB175950 | CI758735 | CI760942 | BJ473920 | BJ474738 |
| EB175722 | EB176187 | CI759848 | CI595828 | BJ473920 | BJ474777 |
| EB175722 | EB176283 | CI761139 | CB668485 | BJ473920 | BJ474995 |
| EB175722 | EB176433 | CI762528 | CI639400 | BJ473920 | BJ475188 |
| EB175722 | EB176867 | CI762918 | CI565606 | BJ473920 | BJ475234 |
| EB175722 | EB176919 | CI762918 | CI566605 | BJ473920 | BJ475362 |
| EB175722 | EB176995 | CI764803 | CI293040 | BJ473920 | BJ475374 |
| EB175722 | EB177138 | CI767950 | CI736805 | BJ473920 | BJ475560 |
| EB175722 | EB177666 | CI769834 | CI769192 | BJ473920 | BJ475699 |
| EB175722 | EB177937 | CI773353 | CB656787 | BJ473920 | BJ475988 |
| EB175722 | EB177944 | CI774182 | CI595447 | BJ473920 | BJ476099 |
| EB175927 | CN864163 | CI775074 | CI570473 | BJ473920 | BJ476125 |
| EB175943 | CN864163 | CI775074 | CI573298 | BJ473920 | BJ476133 |
| EB175945 | CN904291 | CI776976 | CI565498 | BJ473920 | BJ476319 |
| EB175970 | EB125192 | CI777537 | CI571468 | BJ473920 | BJ476557 |
| EB176022 | CN904291 | CX728749 | AU057644 | BJ473920 | BJ476763 |
| EB176122 | EB144301 | D16029   | AU161728 | BJ473920 | BJ476963 |
| EB176122 | EB177250 | D23873   | CI085936 | BJ473920 | BJ477490 |
| EB176122 | EB177424 | D24751   | CB644425 | BJ473920 | BJ477532 |



|                              |          |                |          |          |          |
|------------------------------|----------|----------------|----------|----------|----------|
| EB176285                     | CN864163 | D41561         | CB672198 | BJ473963 | AV927924 |
| EB176320                     | EB131266 | D46789         | CI768128 | BJ473963 | AV928352 |
| EB176320                     | EB145649 | D47052         | CI665544 | BJ473963 | AV929500 |
| EB176320                     | EB177306 | D47682         | CI287463 | BJ473963 | AV932491 |
| EB176379                     | CN864163 | D47682         | CI287477 | BJ473963 | AV932793 |
| EB176382                     | EB124866 | D48240         | CI642830 | BJ473963 | AV933898 |
| EB176435                     | EB125192 | D48853         | CI112577 | BJ473963 | AV935188 |
| EB176545                     | EB131266 | <i>Sorghum</i> | btx623   | BJ473963 | AV935340 |
| EB176545                     | EB145649 | EST1           | EST2     | BJ473963 | AV935410 |
| EB176545                     | EB177306 | AW282746       | AW282609 | BJ473963 | AV935494 |
| EB176600                     | EB138248 | AW282746       | AW283552 | BJ473963 | AV935539 |
| EB176773                     | CN864163 | AW282746       | AW283655 | BJ473963 | AV935630 |
| EB176774                     | CN864163 | AW282746       | AW284145 | BJ473963 | AV935738 |
| EB176802                     | CN864163 | AW282746       | AW284244 | BJ473963 | AV935823 |
| EB176836                     | CN904291 | AW282746       | AW284386 | BJ473963 | AV936074 |
| EB176910                     | CN864163 | AW282746       | AW285456 | BJ473963 | AV936136 |
| EB176974                     | EB119257 | AW282746       | AW286404 | BJ473963 | AV936345 |
| EB176974                     | EB138248 | AW282746       | AW286540 | BJ473963 | AV936418 |
| EB176974                     | EB176400 | AW282746       | AW286646 | BJ473963 | AV936453 |
| EB177163                     | EB138277 | AW282746       | AW563215 | BJ473963 | AV936688 |
| EB177163                     | EB176400 | AW282746       | AW565669 | BJ473963 | AV936751 |
| EB177163                     | EB176750 | AW282746       | AW565761 | BJ473963 | AV936757 |
| EB177163                     | EB177932 | AW282746       | AW565877 | BJ473963 | AV936763 |
| EB177178                     | CN901624 | AW282746       | AW565941 | BJ473963 | AV936797 |
| EB177178                     | EB136782 | AW282746       | AW672294 | BJ473963 | AV936939 |
| EB177178                     | EB137036 | AW282746       | AW679963 | BJ473963 | AV937076 |
| EB177178                     | EB137463 | AW282746       | AW745101 | BJ473963 | AV937209 |
| EB177178                     | EB177203 | AW282746       | AW745169 | BJ473963 | BJ472797 |
| EB177178                     | EB177380 | AW282956       | AW680909 | BJ473963 | BJ473511 |
| EB177178                     | EB177619 | AW282956       | BE601184 | BJ473963 | BJ473798 |
| EB177370                     | EB177261 | AW283051       | BM330599 | BJ473963 | BJ473908 |
| EB177462                     | EB119547 | AW283274       | AW284918 | BJ473963 | BJ474094 |
| EB177462                     | EB131486 | AW283719       | BG411458 | BJ473963 | BJ474123 |
| EB177582                     | EB110059 | AW284453       | BE599250 | BJ473963 | BJ474193 |
| EB177592                     | EB123861 | AW284489       | CF433197 | BJ473963 | BJ474409 |
| EB177608                     | CN864163 | AW284596       | BE599250 | BJ473963 | BJ474578 |
| EB177611                     | EB110059 | AW285568       | BM330906 | BJ473963 | BJ474738 |
| EB177809                     | CN864163 | AW285616       | BE594348 | BJ473963 | BJ474777 |
| EB177832                     | EB176060 | AW285721       | BM330474 | BJ473963 | BJ474995 |
| EB177832                     | EB176400 | AW285941       | BG556076 | BJ473963 | BJ475188 |
| EB177832                     | EB176750 | AW285992       | BG947441 | BJ473963 | BJ475234 |
| EB177832                     | EB177100 | AW285992       | BI075223 | BJ473963 | BJ475362 |
| EB177832                     | EB177932 | AW286120       | CF429100 | BJ473963 | BJ475374 |
| EB177980                     | CN864163 | AW286700       | CF071336 | BJ473963 | BJ475560 |
| <i>Solanum ly. micro-tom</i> |          | AW286881       | AW563975 | BJ473963 | BJ475699 |
| EST1                         | EST2     | AW286914       | CN129985 | BJ473963 | BJ475988 |
| BP875631                     | DB690867 | AW287110       | CD432683 | BJ473963 | BJ476099 |
| BP875636                     | BP898270 | AW287315       | BE358341 | BJ473963 | BJ476125 |
| BP875697                     | DB727410 | AW287315       | BG948468 | BJ473963 | BJ476133 |
| BP875733                     | BP883866 | AW287315       | BI075807 | BJ473963 | BJ476319 |
| BP875757                     | BP879942 | AW287315       | BI075997 | BJ473963 | BJ476557 |
| BP875757                     | BW688191 | AW287315       | BI246040 | BJ473963 | BJ476763 |

|          |          |          |          |          |          |
|----------|----------|----------|----------|----------|----------|
| BP875757 | DB680094 | AW287315 | CF429076 | BJ473963 | BJ476963 |
| BP875779 | BP882942 | AW287315 | CN130454 | BJ473963 | BJ477490 |
| BP875828 | BW692892 | AW287330 | BG273528 | BJ473963 | BJ477532 |
| BP875917 | BP908888 | AW287335 | AW287664 | BJ473999 | AV925248 |
| BP875917 | BP911084 | AW287443 | AW563975 | BJ473999 | AV927019 |
| BP875917 | DB688742 | AW287462 | AW563975 | BJ473999 | AV930401 |
| BP875923 | BP892671 | AW563246 | AW283695 | BJ474071 | AV927019 |
| BP875923 | BW687027 | AW563246 | BE364100 | BJ474071 | AV930401 |
| BP876068 | BW688265 | AW563308 | CN128524 | BJ474107 | AV914971 |
| BP876074 | DB702511 | AW563530 | AW286212 | BJ474107 | AV920091 |
| BP876112 | BP910434 | AW563580 | CX611795 | BJ474107 | AV922718 |
| BP876124 | BP882942 | AW563596 | CF431210 | BJ474107 | AV927439 |
| BP876147 | BW688265 | AW563829 | BE125980 | BJ474107 | AV927674 |
| BP876209 | DB717158 | AW564212 | AW563975 | BJ474107 | AV927717 |
| BP876242 | BP897920 | AW564233 | BE125689 | BJ474107 | AV927831 |
| BP876252 | BP881098 | AW564233 | BE125739 | BJ474107 | AV929485 |
| BP876340 | DB727410 | AW564233 | BF177145 | BJ474107 | AV929602 |
| BP876366 | BW687359 | AW564233 | BG054155 | BJ474107 | AV930671 |
| BP876423 | DB721665 | AW564233 | BG357888 | BJ474143 | BJ546915 |
| BP876465 | DB707480 | AW564233 | BG463890 | BJ474143 | BJ547463 |
| BP876597 | BP883866 | AW564233 | BG948468 | BJ474154 | BY871745 |
| BP876609 | BP910111 | AW564233 | BI211283 | BJ474236 | AV927202 |
| BP876617 | BP885631 | AW564233 | CF430529 | BJ474236 | AV928352 |
| BP876633 | DB714188 | AW564233 | CF434211 | BJ474236 | AV928957 |
| BP876658 | BP883754 | AW564233 | CN128992 | BJ474236 | AV929500 |
| BP876658 | BP887653 | AW564233 | CN129459 | BJ474236 | AV931515 |
| BP876658 | BW688022 | AW564233 | CN130437 | BJ474236 | AV932491 |
| BP876658 | BW689260 | AW564233 | CX609258 | BJ474236 | AV932793 |
| BP876720 | BP892671 | AW564272 | AW285894 | BJ474236 | AV934662 |
| BP876720 | BW687027 | AW564272 | AW286136 | BJ474236 | AV934761 |
| BP876768 | DB704443 | AW564272 | AW564510 | BJ474236 | AV934857 |
| BP876791 | BW687027 | AW564272 | AW671025 | BJ474236 | AV934924 |
| BP876804 | BP885631 | AW564272 | BE125689 | BJ474236 | AV934993 |
| BP876812 | DB727410 | AW564272 | BE125739 | BJ474236 | AV935188 |
| BP876957 | BP877566 | AW564272 | BE125887 | BJ474236 | AV935435 |
| BP876984 | BP876279 | AW564272 | BF177145 | BJ474236 | AV935494 |
| BP876984 | BP877336 | AW564272 | BG054155 | BJ474236 | AV935531 |
| BP876984 | BP878777 | AW564272 | BG357888 | BJ474236 | AV935539 |
| BP876984 | BP881077 | AW564272 | BG463890 | BJ474236 | AV935663 |
| BP876984 | BP882409 | AW564272 | BG948468 | BJ474236 | AV935738 |
| BP876984 | BP885194 | AW564272 | BI075998 | BJ474236 | AV936029 |
| BP876984 | BP888127 | AW564272 | BI211277 | BJ474236 | AV936053 |
| BP876984 | BP888473 | AW564272 | BI211283 | BJ474236 | AV936074 |
| BP877000 | BP877390 | AW564272 | BI245898 | BJ474236 | AV936084 |
| BP877000 | DB680508 | AW564272 | BI246040 | BJ474236 | AV936136 |
| BP877000 | DB713243 | AW564272 | CF427446 | BJ474236 | AV936220 |
| BP877000 | DB713563 | AW564272 | CF430529 | BJ474236 | AV936747 |
| BP877008 | DB718448 | AW564272 | CF430687 | BJ474236 | AV936962 |
| BP877008 | DB718462 | AW564272 | CF431904 | BJ474236 | AV937064 |
| BP877147 | BP892702 | AW564272 | CF434211 | BJ474236 | BJ469485 |
| BP877227 | BP878717 | AW564272 | CN127349 | BJ474236 | BJ470208 |
| BP877227 | BP880168 | AW564272 | CN128992 | BJ474236 | BJ470912 |

|          |          |          |          |          |          |
|----------|----------|----------|----------|----------|----------|
| BP877227 | BP881034 | AW564272 | CN129459 | BJ474236 | BJ473492 |
| BP877227 | DB688942 | AW564272 | CN130437 | BJ474236 | BJ473566 |
| BP877227 | DB704952 | AW564272 | CX609258 | BJ474236 | BJ473732 |
| BP877265 | BP877844 | AW564272 | CX610743 | BJ474236 | BJ474205 |
| BP877265 | DB695827 | AW564272 | CX611300 | BJ474236 | BJ474270 |
| BP877265 | DB696292 | AW564272 | CX612090 | BJ474236 | BJ474334 |
| BP877265 | DB704734 | AW564347 | AW564867 | BJ474236 | BJ474377 |
| BP877343 | DB695735 | AW564347 | BG947995 | BJ474236 | BJ474424 |
| BP877343 | DB696292 | AW564347 | BG948760 | BJ474236 | BJ474772 |
| BP877400 | BP894442 | AW564347 | CD431264 | BJ474236 | BJ474777 |
| BP877400 | BW687027 | AW564347 | CD463024 | BJ474236 | BJ474994 |
| BP877459 | BP881023 | AW564347 | CF427446 | BJ474236 | BJ475152 |
| BP877472 | BP892671 | AW564347 | CF431340 | BJ474236 | BJ475362 |
| BP877481 | BP881728 | AW564347 | CF431717 | BJ474236 | BJ475374 |
| BP877481 | BP883336 | AW564347 | CN124304 | BJ474236 | BJ475491 |
| BP877481 | BP883675 | AW564347 | CX608143 | BJ474236 | BJ476013 |
| BP877481 | BW688694 | AW564347 | CX609258 | BJ474236 | BJ476125 |
| BP877481 | BW690447 | AW564347 | CX610743 | BJ474236 | BJ476265 |
| BP877481 | BW691119 | AW564347 | CX611436 | BJ474236 | BJ476481 |
| BP877481 | BW691789 | AW564347 | CX612090 | BJ474236 | BJ476894 |
| BP877481 | BW692496 | AW564359 | CF428346 | BJ474236 | BJ476959 |
| BP877583 | BP882942 | AW564393 | CF074001 | BJ474236 | BJ477027 |
| BP877624 | BW687027 | AW564393 | CN124234 | BJ474236 | BJ477314 |
| BP877708 | BP877566 | AW564393 | CX610596 | BJ474236 | BJ477400 |
| BP877733 | DB693159 | AW564400 | CD424719 | BJ474236 | BJ477412 |
| BP877748 | BW687027 | AW564791 | CF432420 | BJ474260 | AV935804 |
| BP877748 | BW687141 | AW564791 | CX608629 | BJ474290 | AV920113 |
| BP877813 | BP889974 | AW564791 | CX609915 | BJ474290 | AV927513 |
| BP877813 | BP892722 | AW564791 | CX611913 | BJ474290 | AV928957 |
| BP877813 | BP893368 | AW564791 | CX611924 | BJ474290 | AV929591 |
| BP877813 | BP894643 | AW565027 | BE600596 | BJ474290 | AV930737 |
| BP877813 | BP894696 | AW565027 | CD462026 | BJ474290 | AV931515 |
| BP877813 | BP894714 | AW565027 | CF071967 | BJ474290 | AV934234 |
| BP877838 | BP882942 | AW565027 | CF074309 | BJ474290 | AV934655 |
| BP877861 | DB716354 | AW565489 | BM328159 | BJ474290 | AV934681 |
| BP877885 | BW689861 | AW565581 | AW284031 | BJ474290 | AV934928 |
| BP877920 | DB685564 | AW565581 | BE366447 | BJ474290 | AV934978 |
| BP877993 | BW688265 | AW565581 | BE595904 | BJ474290 | AV935100 |
| BP877993 | DB680094 | AW565756 | BE596057 | BJ474290 | AV935188 |
| BP878017 | DB724242 | AW565756 | BE599327 | BJ474290 | AV935410 |
| BP878184 | BW687027 | AW565756 | CX609002 | BJ474290 | AV935492 |
| BP878250 | BW687141 | AW565756 | CX609007 | BJ474290 | AV935494 |
| BP878295 | DB678507 | AW565756 | CX609539 | BJ474290 | AV935523 |
| BP878295 | DB710320 | AW565756 | CX611342 | BJ474290 | AV935539 |
| BP878308 | BW687141 | AW565801 | CF486838 | BJ474290 | AV935681 |
| BP878321 | BW687141 | AW671048 | BE125689 | BJ474290 | AV935823 |
| BP878362 | BP899641 | AW671048 | BE125739 | BJ474290 | AV935842 |
| BP878378 | BP880625 | AW671048 | BF177145 | BJ474290 | AV935878 |
| BP878411 | DB726859 | AW671048 | BG357888 | BJ474290 | AV936029 |
| BP878492 | BW687027 | AW671048 | BG463890 | BJ474290 | AV936084 |
| BP878577 | DB681697 | AW671048 | BG947296 | BJ474290 | AV936222 |
| BP878577 | DB693373 | AW671048 | BI140447 | BJ474290 | AV936266 |

|          |          |          |          |          |          |
|----------|----------|----------|----------|----------|----------|
| BP878577 | DB721041 | AW671048 | CF430529 | BJ474290 | AV936454 |
| BP878596 | BP902160 | AW671048 | CF434211 | BJ474290 | AV936475 |
| BP878623 | BP892671 | AW671048 | CN128992 | BJ474290 | AV936489 |
| BP878623 | BW687027 | AW671048 | CN129459 | BJ474290 | AV936689 |
| BP878732 | BP887078 | AW671048 | CN130437 | BJ474290 | AV936763 |
| BP878734 | BP900248 | AW671048 | CX609258 | BJ474290 | BJ469485 |
| BP878746 | BP880808 | AW671256 | CX607899 | BJ474290 | BJ471501 |
| BP878750 | BW687027 | AW671615 | AW563975 | BJ474290 | BJ473492 |
| BP878760 | DB679873 | AW671623 | CN131381 | BJ474290 | BJ473589 |
| BP878783 | DB693179 | AW671674 | AW287632 | BJ474290 | BJ473699 |
| BP878844 | BP885631 | AW671674 | CX606406 | BJ474290 | BJ473805 |
| BP879032 | BW687027 | AW672098 | BE125689 | BJ474290 | BJ473820 |
| BP879059 | BP876506 | AW672098 | BE125739 | BJ474290 | BJ473871 |
| BP879155 | BW687027 | AW672098 | BF177145 | BJ474290 | BJ474123 |
| BP879428 | BW691990 | AW672098 | BG054155 | BJ474290 | BJ474193 |
| BP879428 | BW692850 | AW672098 | BG357888 | BJ474290 | BJ474736 |
| BP879428 | DB716027 | AW672098 | BG463890 | BJ474290 | BJ474777 |
| BP879534 | BW687359 | AW672098 | BG948468 | BJ474290 | BJ474953 |
| BP879572 | BW687141 | AW672098 | BI211283 | BJ474290 | BJ474995 |
| BP879590 | DB722257 | AW672098 | CF430529 | BJ474290 | BJ475061 |
| BP879594 | BP884763 | AW672098 | CF434211 | BJ474290 | BJ475152 |
| BP879604 | DB714386 | AW672098 | CN128992 | BJ474290 | BJ475188 |
| BP879661 | BW687359 | AW672098 | CN129459 | BJ474290 | BJ475234 |
| BP879700 | BP883627 | AW672098 | CN130437 | BJ474290 | BJ475328 |
| BP879700 | DB710796 | AW672098 | CX609258 | BJ474290 | BJ475398 |
| BP879746 | BP875881 | AW672232 | CX611795 | BJ474290 | BJ475491 |
| BP879746 | BP886139 | AW672431 | BE594976 | BJ474290 | BJ475627 |
| BP879746 | BP898350 | AW672431 | BE597871 | BJ474290 | BJ475699 |
| BP879746 | DB678836 | AW672431 | BM318214 | BJ474290 | BJ475738 |
| BP879746 | DB681588 | AW672431 | BM330471 | BJ474290 | BJ475988 |
| BP879746 | DB692294 | AW672431 | CD428764 | BJ474290 | BJ476013 |
| BP879746 | DB692366 | AW672431 | CD429007 | BJ474290 | BJ476140 |
| BP879746 | DB700335 | AW672431 | CF428841 | BJ474290 | BJ476319 |
| BP879746 | DB722441 | AW672470 | BM323432 | BJ474290 | BJ476572 |
| BP879746 | DB722905 | AW676971 | CF485490 | BJ474290 | BJ476763 |
| BP879746 | DB723199 | AW677028 | BE356669 | BJ474290 | BJ476815 |
| BP879812 | BP877566 | AW677028 | CF432740 | BJ474290 | BJ476851 |
| BP879821 | BW687027 | AW677028 | CX609604 | BJ474290 | BJ477400 |
| BP880052 | BP880550 | AW677041 | AW679012 | BJ474290 | BJ477490 |
| BP880052 | BP902077 | AW677121 | CF074064 | BJ474290 | BJ477533 |
| BP880052 | BW688804 | AW677156 | CF074064 | BJ474290 | BY862140 |
| BP880052 | DB695112 | AW677249 | BM324597 | BJ474312 | BJ472390 |
| BP880052 | DB699760 | AW677429 | CF429265 | BJ474346 | AV930401 |
| BP880055 | BW690250 | AW677434 | AW677179 | BJ474363 | AV930182 |
| BP880137 | DB710772 | AW677434 | BE358193 | BJ474381 | BJ476193 |
| BP880145 | BP883627 | AW677434 | BE360218 | BJ474410 | BJ473315 |
| BP880145 | DB710796 | AW677434 | CN125071 | BJ474436 | BJ476193 |
| BP880193 | BP880625 | AW677434 | CX606521 | BJ474446 | BJ548656 |
| BP880265 | DB711647 | AW677549 | CF429265 | BJ474532 | BJ476193 |
| BP880326 | DB716084 | AW677560 | BG101747 | BJ474570 | BJ476193 |
| BP880375 | BP888643 | AW677581 | AW284995 | BJ474580 | AV920113 |
| BP880386 | BP898644 | AW677581 | BG048321 | BJ474580 | AV927513 |

|          |          |          |          |          |          |
|----------|----------|----------|----------|----------|----------|
| BP880386 | BP900201 | AW677581 | CN127599 | BJ474580 | AV927924 |
| BP880386 | DB688519 | AW677750 | BE597189 | BJ474580 | AV928352 |
| BP880386 | DB693685 | AW677750 | BG948300 | BJ474580 | AV928957 |
| BP880386 | DB714796 | AW677759 | BE918547 | BJ474580 | AV929500 |
| BP880425 | DB718448 | AW677821 | CN129985 | BJ474580 | AV929591 |
| BP880451 | DB691359 | AW677876 | CD426822 | BJ474580 | AV930737 |
| BP880564 | DB693159 | AW677908 | BF317771 | BJ474580 | AV931515 |
| BP880579 | BP878398 | AW677919 | CD430358 | BJ474580 | AV932491 |
| BP880594 | DB685363 | AW677927 | BE917879 | BJ474580 | AV932793 |
| BP880594 | DB708247 | AW677941 | BE917879 | BJ474580 | AV933898 |
| BP880658 | BP879694 | AW678102 | AW923585 | BJ474580 | AV934234 |
| BP880658 | BW691059 | AW678187 | CN124904 | BJ474580 | AV934655 |
| BP880658 | DB701691 | AW678268 | CN130071 | BJ474580 | AV934681 |
| BP880658 | DB714629 | AW678329 | BM331299 | BJ474580 | AV934928 |
| BP880658 | DB725001 | AW678369 | BE917879 | BJ474580 | AV934978 |
| BP880685 | BW687027 | AW678369 | CN129985 | BJ474580 | AV935100 |
| BP880732 | BW687027 | AW678400 | BI140867 | BJ474580 | AV935188 |
| BP880733 | BP884137 | AW678480 | BE596419 | BJ474580 | AV935340 |
| BP880733 | BP911375 | AW678640 | BE917879 | BJ474580 | AV935410 |
| BP880743 | DB713706 | AW678659 | BG048670 | BJ474580 | AV935492 |
| BP880785 | BP907817 | AW678781 | BM331299 | BJ474580 | AV935494 |
| BP880790 | BW687027 | AW678973 | AW678408 | BJ474580 | AV935523 |
| BP880790 | BW687141 | AW678973 | BE595668 | BJ474580 | AV935539 |
| BP880806 | DB703982 | AW678973 | CD428817 | BJ474580 | AV935630 |
| BP880806 | DB708150 | AW678973 | CF072076 | BJ474580 | AV935681 |
| BP880853 | BP884285 | AW678973 | CF426846 | BJ474580 | AV935738 |
| BP880853 | DB697573 | AW678973 | CF427002 | BJ474580 | AV935823 |
| BP880894 | BW687027 | AW678973 | CF427652 | BJ474580 | AV935842 |
| BP880917 | BP896326 | AW678973 | CF427712 | BJ474580 | AV935878 |
| BP880934 | BP894442 | AW678973 | CF428022 | BJ474580 | AV936029 |
| BP880967 | BP898909 | AW678973 | CF428473 | BJ474580 | AV936074 |
| BP880967 | BP901451 | AW678973 | CF429360 | BJ474580 | AV936084 |
| BP880980 | DB711649 | AW678973 | CF430056 | BJ474580 | AV936136 |
| BP880980 | DB717050 | AW678973 | CF430106 | BJ474580 | AV936222 |
| BP880990 | DB716316 | AW678973 | CF430404 | BJ474580 | AV936266 |
| BP881189 | BP876128 | AW678973 | CF431270 | BJ474580 | AV936345 |
| BP881189 | BP876443 | AW678973 | CF432779 | BJ474580 | AV936418 |
| BP881189 | BP880334 | AW678973 | CX606483 | BJ474580 | AV936453 |
| BP881189 | BP881149 | AW678973 | CX606830 | BJ474580 | AV936454 |
| BP881189 | BP881347 | AW678973 | CX608151 | BJ474580 | AV936475 |
| BP881189 | BP885797 | AW678973 | CX610485 | BJ474580 | AV936489 |
| BP881189 | BP886762 | AW678991 | CD462554 | BJ474580 | AV936688 |
| BP881189 | BW685546 | AW679089 | BE592443 | BJ474580 | AV936689 |
| BP881189 | BW687145 | AW679090 | CD461801 | BJ474580 | AV936751 |
| BP881189 | BW687331 | AW679092 | BE593010 | BJ474580 | AV936757 |
| BP881189 | BW687631 | AW679092 | BG240403 | BJ474580 | AV936763 |
| BP881189 | BW688118 | AW679095 | BI074447 | BJ474580 | AV936797 |
| BP881189 | BW688392 | AW679096 | AW680955 | BJ474580 | AV936939 |
| BP881189 | BW688571 | AW679098 | AW679027 | BJ474580 | AV937076 |
| BP881189 | BW688741 | AW679098 | BE593635 | BJ474580 | AV937135 |
| BP881189 | BW690153 | AW679114 | AW677640 | BJ474580 | AV937209 |
| BP881189 | BW692163 | AW679114 | AW677667 | BJ474580 | BJ469485 |

|          |          |          |          |          |          |
|----------|----------|----------|----------|----------|----------|
| BP881189 | BW692303 | AW679114 | AW678212 | BJ474580 | BJ471501 |
| BP881189 | BW692514 | AW679114 | AW678655 | BJ474580 | BJ472797 |
| BP881257 | DB680094 | AW679114 | AW678914 | BJ474580 | BJ473492 |
| BP881294 | BP877304 | AW679114 | AW680499 | BJ474580 | BJ473511 |
| BP881294 | BW687489 | AW679114 | AW745364 | BJ474580 | BJ473589 |
| BP881294 | BW689075 | AW679114 | AW746440 | BJ474580 | BJ473699 |
| BP881294 | BW690193 | AW679116 | AW680888 | BJ474580 | BJ473798 |
| BP881294 | BW692826 | AW679116 | BG947954 | BJ474580 | BJ473805 |
| BP881348 | BP907574 | AW679117 | BE353019 | BJ474580 | BJ473820 |
| BP881359 | BW687027 | AW679121 | CN129576 | BJ474580 | BJ473871 |
| BP881367 | BP886560 | AW679126 | AW681062 | BJ474580 | BJ473908 |
| BP881370 | BP907817 | AW679126 | AW746491 | BJ474580 | BJ474094 |
| BP881390 | DB705780 | AW679126 | AW746550 | BJ474580 | BJ474123 |
| BP881416 | BP877566 | AW679126 | AW747039 | BJ474580 | BJ474193 |
| BP881422 | BP882942 | AW679126 | AW924533 | BJ474580 | BJ474409 |
| BP881486 | BW690188 | AW679126 | AW924846 | BJ474580 | BJ474496 |
| BP881486 | DB712519 | AW679126 | CD463726 | BJ474580 | BJ474578 |
| BP881554 | DB700820 | AW679127 | AW922131 | BJ474580 | BJ474736 |
| BP881606 | BP877808 | AW679127 | BG411506 | BJ474580 | BJ474738 |
| BP881703 | BP876050 | AW679130 | BG240735 | BJ474580 | BJ474777 |
| BP881703 | BP877063 | AW679131 | AW680485 | BJ474580 | BJ474953 |
| BP881703 | BP877822 | AW679131 | AW925096 | BJ474580 | BJ474995 |
| BP881703 | BP877823 | AW679131 | BE363637 | BJ474580 | BJ475061 |
| BP881703 | BP878538 | AW679131 | BE593543 | BJ474580 | BJ475152 |
| BP881703 | BP879618 | AW679134 | CF483828 | BJ474580 | BJ475188 |
| BP881703 | BP880172 | AW679143 | AW680817 | BJ474580 | BJ475234 |
| BP881703 | BP881025 | AW679143 | AW745382 | BJ474580 | BJ475328 |
| BP881703 | BP881262 | AW679143 | AW922684 | BJ474580 | BJ475362 |
| BP881703 | BP881479 | AW679143 | AW922883 | BJ474580 | BJ475374 |
| BP881703 | BP881759 | AW679143 | BE361419 | BJ474580 | BJ475398 |
| BP881703 | BP883001 | AW679143 | BE363775 | BJ474580 | BJ475491 |
| BP881703 | BP883337 | AW679143 | BE593499 | BJ474580 | BJ475627 |
| BP881703 | BP884412 | AW679143 | BE594007 | BJ474580 | BJ475699 |
| BP881703 | BP884766 | AW679143 | BG159678 | BJ474580 | BJ475738 |
| BP881703 | BP885295 | AW679143 | BG240632 | BJ474580 | BJ475988 |
| BP881703 | BP885300 | AW679143 | CD432044 | BJ474580 | BJ476013 |
| BP881703 | BP885798 | AW679151 | EB725753 | BJ474580 | BJ476099 |
| BP881703 | BP886492 | AW679152 | AW287455 | BJ474580 | BJ476125 |
| BP881703 | BP888204 | AW679152 | AW287517 | BJ474580 | BJ476133 |
| BP881703 | BP888755 | AW679152 | AW678238 | BJ474580 | BJ476140 |
| BP881703 | DB715261 | AW679152 | AW746099 | BJ474580 | BJ476319 |
| BP881703 | DB726285 | AW679152 | AW922099 | BJ474580 | BJ476557 |
| BP881704 | DB716750 | AW679152 | AW922100 | BJ474580 | BJ476572 |
| BP881737 | BP877566 | AW679152 | BE364060 | BJ474580 | BJ476654 |
| BP881740 | DB693159 | AW679152 | BE594219 | BJ474580 | BJ476763 |
| BP881748 | BW687141 | AW679152 | BE595103 | BJ474580 | BJ476815 |
| BP881773 | BP885631 | AW679152 | BE597494 | BJ474580 | BJ476851 |
| BP881790 | BP880625 | AW679152 | BM318387 | BJ474580 | BJ476902 |
| BP881796 | BW685507 | AW679152 | EB725063 | BJ474580 | BJ476963 |
| BP881959 | DB722257 | AW679159 | AW563468 | BJ474580 | BJ477400 |
| BP882045 | BW687027 | AW679159 | AW747186 | BJ474580 | BJ477490 |
| BP882063 | BW687359 | AW679159 | CD428036 | BJ474580 | BJ477532 |

|          |          |          |          |          |          |
|----------|----------|----------|----------|----------|----------|
| BP882073 | DB703082 | AW679162 | AW745986 | BJ474580 | BJ477533 |
| BP882084 | BP883988 | AW679251 | AW681192 | BJ474580 | BY862140 |
| BP882116 | BP892671 | AW679251 | BE356809 | BJ474616 | AV934216 |
| BP882116 | BP894442 | AW679251 | BE594193 | BJ474616 | AV936473 |
| BP882116 | BW687027 | AW679252 | AW923861 | BJ474702 | BJ468827 |
| BP882137 | BP892671 | AW679252 | BE592714 | BJ474718 | AV935452 |
| BP882137 | BW687027 | AW679252 | BG410788 | BJ474718 | BJ476193 |
| BP882230 | BP892671 | AW679253 | AW679210 | BJ474791 | BJ469152 |
| BP882230 | BW687027 | AW679254 | AW679211 | BJ474797 | BJ464681 |
| BP882264 | DB710796 | AW679254 | BG357446 | BJ474810 | AV934216 |
| BP882459 | BP885810 | AW679254 | CF487565 | BJ474810 | AV935105 |
| BP882459 | DB689440 | AW679264 | BE360009 | BJ474810 | BJ470741 |
| BP882483 | DB683054 | AW679264 | BG933119 | BJ474810 | BJ475566 |
| BP882508 | BP884559 | AW679268 | CN127692 | BJ474818 | AV935452 |
| BP882508 | BW691545 | AW679275 | BE593862 | BJ474821 | BJ546915 |
| BP882508 | DB696202 | AW679275 | BE594175 | BJ474856 | AV927202 |
| BP882541 | BP896648 | AW679275 | BG239995 | BJ474856 | AV928352 |
| BP882541 | BP897532 | AW679275 | BG946882 | BJ474856 | AV928957 |
| BP882541 | BP897808 | AW679275 | CD429044 | BJ474856 | AV929500 |
| BP882541 | BP897974 | AW679275 | CD463277 | BJ474856 | AV931515 |
| BP882541 | BP898187 | AW679275 | CD463376 | BJ474856 | AV932491 |
| BP882541 | BP899404 | AW679275 | CF427054 | BJ474856 | AV932793 |
| BP882541 | BP899659 | AW679275 | CF428322 | BJ474856 | AV934662 |
| BP882541 | BP905883 | AW679275 | CF429204 | BJ474856 | AV934761 |
| BP882541 | BP906645 | AW679276 | AW283293 | BJ474856 | AV934857 |
| BP882541 | BP907694 | AW679276 | AW283700 | BJ474856 | AV934924 |
| BP882541 | BP908950 | AW679276 | AW922650 | BJ474856 | AV934993 |
| BP882541 | BP909292 | AW679276 | AW924838 | BJ474856 | AV935188 |
| BP882541 | BP909315 | AW679276 | BE363615 | BJ474856 | AV935435 |
| BP882541 | DB679045 | AW679276 | BE918299 | BJ474856 | AV935494 |
| BP882541 | DB680268 | AW679276 | BF177075 | BJ474856 | AV935531 |
| BP882541 | DB681260 | AW679276 | BG048208 | BJ474856 | AV935539 |
| BP882541 | DB683613 | AW679276 | BG049387 | BJ474856 | AV935663 |
| BP882541 | DB683771 | AW679276 | BG158225 | BJ474856 | AV935738 |
| BP882541 | DB684686 | AW679276 | BG357542 | BJ474856 | AV936029 |
| BP882541 | DB685323 | AW679276 | BG462981 | BJ474856 | AV936053 |
| BP882541 | DB685529 | AW679276 | BG463521 | BJ474856 | AV936074 |
| BP882541 | DB686670 | AW679276 | BG463976 | BJ474856 | AV936084 |
| BP882541 | DB688803 | AW679276 | BG464753 | BJ474856 | AV936136 |
| BP882541 | DB689160 | AW679276 | BG739372 | BJ474856 | AV936220 |
| BP882541 | DB689910 | AW679276 | BI212052 | BJ474856 | AV936747 |
| BP882541 | DB690000 | AW679276 | BM326961 | BJ474856 | AV936893 |
| BP882541 | DB692369 | AW679276 | BM328023 | BJ474856 | AV936962 |
| BP882541 | DB692591 | AW679276 | BM330361 | BJ474856 | AV937064 |
| BP882541 | DB692988 | AW679276 | CD423564 | BJ474856 | BJ469485 |
| BP882541 | DB694040 | AW679276 | CD423748 | BJ474856 | BJ470208 |
| BP882541 | DB695645 | AW679276 | CD423788 | BJ474856 | BJ470912 |
| BP882541 | DB696566 | AW679276 | CD423791 | BJ474856 | BJ473492 |
| BP882541 | DB696728 | AW679276 | CD461908 | BJ474856 | BJ473566 |
| BP882541 | DB697270 | AW679276 | CF071065 | BJ474856 | BJ473732 |
| BP882541 | DB697321 | AW679276 | CF071278 | BJ474856 | BJ474205 |
| BP882541 | DB697409 | AW679276 | CF072646 | BJ474856 | BJ474270 |

|          |          |          |          |          |          |
|----------|----------|----------|----------|----------|----------|
| BP882541 | DB698319 | AW679276 | CF072680 | BJ474856 | BJ474334 |
| BP882541 | DB699471 | AW679276 | CF072866 | BJ474856 | BJ474377 |
| BP882541 | DB699910 | AW679276 | CF073168 | BJ474856 | BJ474424 |
| BP882541 | DB700105 | AW679276 | CF073408 | BJ474856 | BJ474772 |
| BP882541 | DB701570 | AW679276 | CF074354 | BJ474856 | BJ474777 |
| BP882541 | DB701705 | AW679276 | CF483557 | BJ474856 | BJ474994 |
| BP882541 | DB702977 | AW679276 | CF484148 | BJ474856 | BJ475152 |
| BP882541 | DB703092 | AW679276 | CF486669 | BJ474856 | BJ475362 |
| BP882541 | DB703553 | AW679276 | CF487839 | BJ474856 | BJ475374 |
| BP882541 | DB704606 | AW679276 | CN126977 | BJ474856 | BJ475491 |
| BP882541 | DB704625 | AW679276 | CN128385 | BJ474856 | BJ476013 |
| BP882541 | DB706726 | AW679276 | CX607884 | BJ474856 | BJ476125 |
| BP882541 | DB709192 | AW679276 | CX609891 | BJ474856 | BJ476265 |
| BP882541 | DB710710 | AW679276 | CX610497 | BJ474856 | BJ476481 |
| BP882541 | DB714288 | AW679276 | CX611388 | BJ474856 | BJ476894 |
| BP882541 | DB715202 | AW679276 | CX611558 | BJ474856 | BJ476902 |
| BP882543 | BP886184 | AW679276 | CX612011 | BJ474856 | BJ476959 |
| BP882543 | BP890668 | AW679279 | AW678752 | BJ474856 | BJ477027 |
| BP882543 | BP902768 | AW679282 | AW283575 | BJ474856 | BJ477314 |
| BP882543 | BP904177 | AW679282 | AW284422 | BJ474856 | BJ477400 |
| BP882543 | DB693991 | AW679282 | AW680991 | BJ474856 | BJ477412 |
| BP882568 | BP876177 | AW679282 | AW925151 | BJ474875 | BJ546915 |
| BP882568 | BP886705 | AW679282 | BE364932 | BJ474875 | BJ547463 |
| BP882568 | BP888852 | AW679282 | BE367488 | BJ474879 | AV932263 |
| BP882568 | BW686140 | AW679282 | BE367585 | BJ474879 | AV934216 |
| BP882568 | BW686218 | AW679282 | BE595623 | BJ474968 | AV933083 |
| BP882568 | BW690180 | AW679282 | BE595744 | BJ474968 | AV936644 |
| BP882568 | BW691046 | AW679282 | BE599523 | BJ474986 | AV928081 |
| BP882568 | DB711216 | AW679282 | BE601219 | BJ475039 | BJ475566 |
| BP882568 | DB725261 | AW679282 | BE638244 | BJ475085 | AU089967 |
| BP882631 | DB686581 | AW679282 | BG323183 | BJ475085 | AU090024 |
| BP882631 | DB714386 | AW679282 | BG411846 | BJ475085 | AV932233 |
| BP882727 | BW687027 | AW679282 | BM322656 | BJ475085 | AV932532 |
| BP882727 | BW687141 | AW679282 | BM325305 | BJ475085 | AV935072 |
| BP882736 | DB678594 | AW679282 | BM329370 | BJ475085 | AV935073 |
| BP882736 | DB713039 | AW679282 | BM331259 | BJ475085 | BJ471580 |
| BP882736 | DB714188 | AW679293 | AW679238 | BJ475085 | BJ471730 |
| BP882737 | DB713194 | AW679293 | BE599067 | BJ475085 | BJ471946 |
| BP882885 | DB691647 | AW679297 | AW679792 | BJ475085 | BJ473791 |
| BP882977 | BP892464 | AW679303 | BE357885 | BJ475085 | BJ474305 |
| BP882977 | BP894898 | AW679303 | BE360117 | BJ475085 | BJ477196 |
| BP883089 | BP907817 | AW679303 | CD427146 | BJ475162 | BJ547261 |
| BP883117 | BW687027 | AW679303 | CD428132 | BJ475162 | BJ547567 |
| BP883125 | BP883866 | AW679303 | CD430277 | BJ475169 | AV935452 |
| BP883158 | DB710028 | AW679303 | CD431395 | BJ475169 | BJ473567 |
| BP883158 | DB717807 | AW679303 | CD464105 | BJ475219 | AV930401 |
| BP883175 | BP887078 | AW679303 | CN123947 | BJ475222 | AV927439 |
| BP883254 | BP881287 | AW679303 | CN124929 | BJ475222 | AV927674 |
| BP883273 | BP878251 | AW679303 | CN125808 | BJ475222 | AV927717 |
| BP883292 | BW687027 | AW679303 | CX608948 | BJ475222 | AV929485 |
| BP883309 | DB683995 | AW679305 | AW678212 | BJ475222 | AV930671 |
| BP883313 | DB693159 | AW679305 | AW678914 | BJ475243 | AV933334 |



|          |          |          |          |          |          |
|----------|----------|----------|----------|----------|----------|
| BP883336 | BP892671 | AW679305 | AW681084 | BJ475291 | AV923205 |
| BP883336 | BW687027 | AW679305 | AW745364 | BJ475291 | BJ476143 |
| BP883366 | BP875898 | AW679305 | AW746512 | BJ475364 | AV914522 |
| BP883366 | BP879325 | AW679305 | AW747300 | BJ475364 | AV919590 |
| BP883366 | BP879345 | AW679305 | AW923935 | BJ475364 | AV930027 |
| BP883366 | BP880329 | AW679305 | AW923944 | BJ475418 | AV934216 |
| BP883366 | BP883580 | AW679305 | AW924119 | BJ475418 | AV935105 |
| BP883366 | BP885043 | AW679305 | AW924208 | BJ475418 | BJ470741 |
| BP883366 | BP885880 | AW679305 | AW924349 | BJ475427 | BJ546915 |
| BP883366 | BP888200 | AW679305 | BE356732 | BJ475427 | BJ547463 |
| BP883366 | BP888578 | AW679305 | BE360009 | BJ475429 | AV934370 |
| BP883366 | BP888679 | AW679305 | BE592655 | BJ475429 | AV936477 |
| BP883366 | BP898248 | AW679305 | BE592803 | BJ475429 | BJ546892 |
| BP883366 | BP906224 | AW679305 | BE593357 | BJ475429 | BJ547970 |
| BP883366 | BP907246 | AW679305 | BE593392 | BJ475429 | BJ547994 |
| BP883366 | BP909082 | AW679305 | BE593396 | BJ475429 | BJ548167 |
| BP883366 | BP909716 | AW679305 | BG411552 | BJ475488 | AU090024 |
| BP883366 | BW685050 | AW679305 | BG557492 | BJ475488 | AU090182 |
| BP883366 | BW686744 | AW679305 | BG933381 | BJ475488 | AV932428 |
| BP883366 | DB683387 | AW679308 | AW923176 | BJ475488 | AV932532 |
| BP883366 | DB690294 | AW679312 | AW923841 | BJ475488 | AV932682 |
| BP883366 | DB700358 | AW679312 | CD432283 | BJ475488 | AV935072 |
| BP883366 | DB700861 | AW679319 | AW677671 | BJ475488 | BJ469089 |
| BP883366 | DB706139 | AW679319 | AW678212 | BJ475488 | BJ471154 |
| BP883366 | DB706229 | AW679319 | AW679175 | BJ475488 | BJ471161 |
| BP883366 | DB707903 | AW679319 | AW679191 | BJ475488 | BJ473029 |
| BP883366 | DB709764 | AW679319 | AW745364 | BJ475488 | BJ476828 |
| BP883366 | DB711930 | AW679319 | AW745732 | BJ475488 | BJ477228 |
| BP883366 | DB720909 | AW679319 | AW746512 | BJ475534 | AV925248 |
| BP883366 | DB724565 | AW679319 | AW747300 | BJ475534 | AV927019 |
| BP883366 | DB726836 | AW679319 | AW747420 | BJ475534 | AV930401 |
| BP883403 | BP880684 | AW679319 | AW923935 | BJ475546 | AV925248 |
| BP883403 | BP880823 | AW679319 | AW923944 | BJ475546 | AV927019 |
| BP883498 | DB718448 | AW679319 | AW924119 | BJ475546 | AV930401 |
| BP883498 | DB718462 | AW679319 | AW924595 | BJ475552 | BJ472390 |
| BP883528 | BP877925 | AW679319 | BE356732 | BJ475654 | AV927924 |
| BP883528 | BP907347 | AW679319 | BE592161 | BJ475654 | AV928352 |
| BP883528 | BW689660 | AW679319 | BE592803 | BJ475654 | AV929500 |
| BP883542 | BP910111 | AW679319 | BE593357 | BJ475654 | AV932491 |
| BP883609 | DB703982 | AW679319 | BE593392 | BJ475654 | AV932793 |
| BP883609 | DB708150 | AW679319 | BE593396 | BJ475654 | AV933898 |
| BP883716 | DB720170 | AW679319 | BE593905 | BJ475654 | AV935188 |
| BP883741 | BP910111 | AW679319 | BE594269 | BJ475654 | AV935340 |
| BP883766 | BP881077 | AW679319 | BG411552 | BJ475654 | AV935410 |
| BP883766 | BP881683 | AW679319 | BG557274 | BJ475654 | AV935494 |
| BP883766 | BP888473 | AW679319 | BG557492 | BJ475654 | AV935539 |
| BP883766 | BP888695 | AW679319 | BG933381 | BJ475654 | AV935630 |
| BP883766 | BW687272 | AW679321 | CF071722 | BJ475654 | AV935738 |
| BP883766 | BW691438 | AW679326 | AW564866 | BJ475654 | AV935823 |
| BP883766 | DB701262 | AW679326 | BE355091 | BJ475654 | AV936074 |
| BP883794 | BP884763 | AW679412 | CD428592 | BJ475654 | AV936136 |
| BP883939 | BW687141 | AW679412 | CX606157 | BJ475654 | AV936345 |

|          |          |          |          |          |          |
|----------|----------|----------|----------|----------|----------|
| BP883976 | DB689007 | AW679412 | CX612151 | BJ475654 | AV936418 |
| BP884370 | BW687027 | AW679416 | AW678279 | BJ475654 | AV936453 |
| BP884379 | DB686581 | AW679416 | AW745681 | BJ475654 | AV936688 |
| BP884379 | DB714386 | AW679416 | AW747604 | BJ475654 | AV936751 |
| BP884387 | BP879915 | AW679416 | BE360783 | BJ475654 | AV936757 |
| BP884454 | BW687027 | AW679416 | BE595557 | BJ475654 | AV936763 |
| BP884463 | DB693159 | AW679416 | BE638156 | BJ475654 | AV936797 |
| BP884477 | BP879915 | AW679416 | BG464746 | BJ475654 | AV936939 |
| BP884540 | BP892671 | AW679416 | CD463531 | BJ475654 | AV937076 |
| BP884540 | BW687027 | AW679418 | AW677814 | BJ475654 | AV937209 |
| BP884552 | BP881287 | AW679418 | AW678736 | BJ475654 | BJ472797 |
| BP884604 | BP886332 | AW679418 | AW681081 | BJ475654 | BJ473511 |
| BP884607 | BP885283 | AW679418 | AW745519 | BJ475654 | BJ473798 |
| BP884607 | BP888684 | AW679418 | AW746463 | BJ475654 | BJ473908 |
| BP884719 | DB703671 | AW679418 | AW746475 | BJ475654 | BJ474094 |
| BP884881 | DB724193 | AW679418 | AW746871 | BJ475654 | BJ474123 |
| BP884907 | DB697485 | AW679418 | AW923993 | BJ475654 | BJ474193 |
| BP885013 | BP882942 | AW679418 | AW925064 | BJ475654 | BJ474409 |
| BP885080 | BP902037 | AW679418 | BE363637 | BJ475654 | BJ474578 |
| BP885080 | BP902119 | AW679418 | BE592453 | BJ475654 | BJ474738 |
| BP885080 | DB686460 | AW679418 | BE592482 | BJ475654 | BJ474777 |
| BP885080 | DB695958 | AW679418 | BE593139 | BJ475654 | BJ474995 |
| BP885080 | DB696168 | AW679418 | BE593629 | BJ475654 | BJ475188 |
| BP885080 | DB707741 | AW679418 | BE595526 | BJ475654 | BJ475234 |
| BP885080 | DB707888 | AW679418 | BG047561 | BJ475654 | BJ475362 |
| BP885185 | BP884763 | AW679418 | BG240249 | BJ475654 | BJ475374 |
| BP885374 | DB688259 | AW679418 | BG241316 | BJ475654 | BJ475560 |
| BP885571 | DB691665 | AW679418 | BG273489 | BJ475654 | BJ475699 |
| BP885653 | BW687359 | AW679418 | BM326351 | BJ475654 | BJ475988 |
| BP885664 | BP886560 | AW679425 | AW747397 | BJ475654 | BJ476099 |
| BP885743 | BP892671 | AW679428 | AW679351 | BJ475654 | BJ476125 |
| BP885743 | BW687027 | AW679428 | BE597424 | BJ475654 | BJ476133 |
| BP885809 | BW687027 | AW679433 | BE356809 | BJ475654 | BJ476319 |
| BP885839 | BP882942 | AW679433 | BE592284 | BJ475654 | BJ476557 |
| BP885841 | BP892671 | AW679442 | AW680631 | BJ475654 | BJ476963 |
| BP885841 | BW687027 | AW679442 | AW746387 | BJ475654 | BJ477490 |
| BP885873 | BP883866 | AW679442 | AW746869 | BJ475654 | BJ477532 |
| BP885929 | BP892671 | AW679442 | AW924144 | BJ475664 | AV935452 |
| BP885929 | BP894442 | AW679442 | AW924998 | BJ475664 | BJ473567 |
| BP885929 | BW687027 | AW679442 | BE363290 | BJ475664 | BJ476193 |
| BP885981 | BP879942 | AW679442 | BE363652 | BJ475696 | AV932044 |
| BP885981 | BW688191 | AW679442 | BE594065 | BJ475696 | AV932788 |
| BP886120 | BW687141 | AW679442 | BE917634 | BJ475696 | AV934883 |
| BP886184 | BP880808 | AW679442 | BF657104 | BJ475696 | AV935172 |
| BP886191 | BP875720 | AW679442 | BG048264 | BJ475696 | AV935421 |
| BP886191 | BP875875 | AW679442 | BG048377 | BJ475696 | BJ476964 |
| BP886191 | BP876830 | AW679442 | BG054204 | BJ475713 | BJ472390 |
| BP886191 | BP879403 | AW679442 | BG241172 | BJ475825 | AV934216 |
| BP886191 | BP885211 | AW679442 | BG273684 | BJ475825 | AV936473 |
| BP886191 | BP885803 | AW679442 | BG411994 | BJ475857 | AV930182 |
| BP886191 | BP886294 | AW679442 | BG412335 | BJ475892 | AV920113 |
| BP886343 | BP899641 | AW679445 | AW677792 | BJ475892 | AV927513 |

|          |          |          |          |          |          |
|----------|----------|----------|----------|----------|----------|
| BP886389 | DB702511 | AW679445 | AW678096 | BJ475892 | AV928957 |
| BP886440 | BP877808 | AW679445 | AW745784 | BJ475892 | AV929591 |
| BP886442 | BP907817 | AW679445 | AW924306 | BJ475892 | AV930737 |
| BP886556 | BW692850 | AW679445 | BE363819 | BJ475892 | AV931515 |
| BP886618 | BP885631 | AW679445 | BE592655 | BJ475892 | AV934234 |
| BP886702 | BP887471 | AW679445 | BE593416 | BJ475892 | AV934655 |
| BP886737 | BW687141 | AW679445 | BE594077 | BJ475892 | AV934681 |
| BP886764 | BP907817 | AW679445 | BG933378 | BJ475892 | AV934928 |
| BP886866 | BP899299 | AW679447 | AW671767 | BJ475892 | AV934978 |
| BP886866 | BP900330 | AW679447 | AW679546 | BJ475892 | AV935100 |
| BP886866 | BP910146 | AW679447 | AW747037 | BJ475892 | AV935188 |
| BP886866 | DB691399 | AW679447 | AW923020 | BJ475892 | AV935410 |
| BP886889 | DB716056 | AW679447 | BE356696 | BJ475892 | AV935492 |
| BP886889 | DB717879 | AW679447 | BE358759 | BJ475892 | AV935494 |
| BP886916 | BW685649 | AW679447 | BE359252 | BJ475892 | AV935523 |
| BP886957 | DB703082 | AW679447 | BE361900 | BJ475892 | AV935539 |
| BP887011 | BP878398 | AW679447 | BF657100 | BJ475892 | AV935681 |
| BP887058 | BP878521 | AW679447 | CX611884 | BJ475892 | AV935823 |
| BP887058 | BP879923 | AW679448 | AW679546 | BJ475892 | AV935842 |
| BP887058 | BP884696 | AW679459 | CF482485 | BJ475892 | AV935878 |
| BP887058 | BP885997 | AW679460 | BE363268 | BJ475892 | AV936029 |
| BP887058 | BP888797 | AW679463 | BG557944 | BJ475892 | AV936084 |
| BP887058 | BP907562 | AW679465 | AW679087 | BJ475892 | AV936222 |
| BP887058 | BP908388 | AW679471 | BE592380 | BJ475892 | AV936266 |
| BP887058 | BW689531 | AW679471 | BE592426 | BJ475892 | AV936454 |
| BP887099 | BW687141 | AW679471 | BE593109 | BJ475892 | AV936475 |
| BP887119 | DB713039 | AW679471 | BG933229 | BJ475892 | AV936489 |
| BP887119 | DB714188 | AW679471 | CD427522 | BJ475892 | AV936689 |
| BP887146 | DB688543 | AW679471 | CF427499 | BJ475892 | AV936763 |
| BP887146 | DB702255 | AW679471 | CF428778 | BJ475892 | AV937135 |
| BP887175 | BP880808 | AW679471 | CF482342 | BJ475892 | BJ469485 |
| BP887214 | BP884763 | AW679471 | CF489672 | BJ475892 | BJ471501 |
| BP887328 | BW688265 | AW679471 | CN129236 | BJ475892 | BJ473492 |
| BP887341 | DB679913 | AW679475 | AW679370 | BJ475892 | BJ473589 |
| BP887343 | BP882942 | AW679477 | AW925217 | BJ475892 | BJ473699 |
| BP887359 | BP885631 | AW679477 | BE356399 | BJ475892 | BJ473805 |
| BP887367 | BW688976 | AW679477 | BE359621 | BJ475892 | BJ473820 |
| BP887393 | BP885631 | AW679477 | BE593631 | BJ475892 | BJ473871 |
| BP887402 | BP885631 | AW679477 | EB725732 | BJ475892 | BJ474123 |
| BP887417 | BW687141 | AW679480 | BG464930 | BJ475892 | BJ474193 |
| BP887447 | BP882942 | AW679482 | AW746491 | BJ475892 | BJ474496 |
| BP887642 | DB678878 | AW679482 | AW746550 | BJ475892 | BJ474736 |
| BP887642 | DB680757 | AW679482 | AW924533 | BJ475892 | BJ474777 |
| BP887642 | DB682795 | AW679485 | AW680450 | BJ475892 | BJ474953 |
| BP887642 | DB685829 | AW679485 | AW924743 | BJ475892 | BJ474995 |
| BP887642 | DB690666 | AW679485 | BE363377 | BJ475892 | BJ475061 |
| BP887642 | DB690721 | AW679485 | EB725673 | BJ475892 | BJ475152 |
| BP887642 | DB690755 | AW679556 | BG556564 | BJ475892 | BJ475188 |
| BP887642 | DB692710 | AW679987 | AW677746 | BJ475892 | BJ475234 |
| BP887642 | DB701793 | AW679987 | AW677813 | BJ475892 | BJ475328 |
| BP887642 | DB703646 | AW679987 | AW678281 | BJ475892 | BJ475398 |
| BP887642 | DB705879 | AW679987 | AW745529 | BJ475892 | BJ475491 |

|          |          |          |          |          |          |
|----------|----------|----------|----------|----------|----------|
| BP887642 | DB713739 | AW679987 | AW746353 | BJ475892 | BJ475627 |
| BP887642 | DB718589 | AW679987 | AW747475 | BJ475892 | BJ475699 |
| BP887642 | DB726263 | AW679987 | BE593753 | BJ475892 | BJ475738 |
| BP887658 | BP892671 | AW679987 | BE593807 | BJ475892 | BJ475988 |
| BP887658 | BW687027 | AW679987 | BE917956 | BJ475892 | BJ476013 |
| BP887777 | BW687027 | AW679987 | BF657374 | BJ475892 | BJ476140 |
| BP887777 | BW687141 | AW679987 | BG047934 | BJ475892 | BJ476319 |
| BP887824 | DB714386 | AW679987 | BG048011 | BJ475892 | BJ476572 |
| BP887848 | BP883866 | AW679987 | BG048980 | BJ475892 | BJ476763 |
| BP887895 | BP878916 | AW679987 | BG240867 | BJ475892 | BJ476815 |
| BP887942 | BP877566 | AW679987 | BG240943 | BJ475892 | BJ476851 |
| BP887944 | BW687027 | AW679987 | BG356801 | BJ475892 | BJ477400 |
| BP887957 | BW687141 | AW680105 | BE367272 | BJ475892 | BJ477490 |
| BP887986 | BW687141 | AW680105 | CF481193 | BJ475892 | BJ477533 |
| BP888009 | BP877844 | AW680105 | CX608693 | BJ475892 | BY862140 |
| BP888009 | DB695827 | AW680218 | BE592676 | BJ475920 | AV927924 |
| BP888009 | DB696292 | AW680218 | CD423427 | BJ475920 | AV928352 |
| BP888170 | DB709648 | AW680218 | CD424891 | BJ475920 | AV929500 |
| BP888218 | DB699072 | AW680218 | CD426359 | BJ475920 | AV930737 |
| BP888236 | BP877808 | AW680218 | CD426550 | BJ475920 | AV932491 |
| BP888267 | BP894442 | AW680228 | AW681115 | BJ475920 | AV932555 |
| BP888267 | BW687141 | AW680228 | CD431153 | BJ475920 | AV932793 |
| BP888318 | BP880779 | AW680228 | CF429009 | BJ475920 | AV933703 |
| BP888318 | DB688830 | AW680307 | CF489202 | BJ475920 | AV933898 |
| BP888318 | DB718538 | AW680494 | CN129985 | BJ475920 | AV934660 |
| BP888318 | DB718559 | AW680644 | BE362746 | BJ475920 | AV934857 |
| BP888318 | DB719170 | AW680644 | BE362809 | BJ475920 | AV934928 |
| BP888325 | BP885631 | AW680691 | BE358028 | BJ475920 | AV935155 |
| BP888341 | DB721112 | AW680691 | BE593077 | BJ475920 | AV935188 |
| BP888341 | DB727408 | AW680691 | CF432128 | BJ475920 | AV935222 |
| BP888378 | DB699072 | AW680691 | CN129722 | BJ475920 | AV935304 |
| BP888486 | DB713039 | AW680712 | CD427604 | BJ475920 | AV935340 |
| BP888486 | DB714188 | AW680712 | CD430916 | BJ475920 | AV935410 |
| BP888505 | BP910111 | AW680712 | CN125667 | BJ475920 | AV935435 |
| BP888578 | DB693159 | AW680712 | CN130273 | BJ475920 | AV935494 |
| BP888587 | DB710789 | AW680712 | CX609286 | BJ475920 | AV935531 |
| BP888597 | DB707586 | AW680815 | AW679012 | BJ475920 | AV935539 |
| BP888617 | BP882942 | AW680894 | AW923270 | BJ475920 | AV935630 |
| BP888620 | BP887471 | AW680901 | CN129985 | BJ475920 | AV935663 |
| BP888625 | DB725332 | AW680964 | BE917879 | BJ475920 | AV935738 |
| BP888634 | BW687027 | AW681007 | BM323243 | BJ475920 | AV935823 |
| BP888746 | BP885631 | AW681027 | AW747706 | BJ475920 | AV935842 |
| BP888993 | BW687027 | AW681027 | BE595417 | BJ475920 | AV935879 |
| BP889013 | BP907817 | AW681027 | CF427626 | BJ475920 | AV936074 |
| BP889023 | BP882161 | AW681027 | CF427738 | BJ475920 | AV936113 |
| BP889023 | BP886214 | AW681056 | BE917879 | BJ475920 | AV936136 |
| BP889044 | BW687141 | AW681056 | CD428256 | BJ475920 | AV936211 |
| BP889049 | BW689879 | AW681056 | CN129985 | BJ475920 | AV936345 |
| BP889065 | BP885125 | AW744774 | BE917879 | BJ475920 | AV936411 |
| BP889065 | DB723923 | AW744774 | CD428256 | BJ475920 | AV936418 |
| BP889155 | DB713039 | AW744774 | CN129985 | BJ475920 | AV936448 |
| BP889202 | BP882018 | AW745005 | BE360912 | BJ475920 | AV936453 |

|          |          |          |          |          |          |
|----------|----------|----------|----------|----------|----------|
| BP889202 | DB716065 | AW745081 | AW563975 | BJ475920 | AV936688 |
| BP889229 | DB714188 | AW745253 | BE366244 | BJ475920 | AV936689 |
| BP889298 | DB717908 | AW745389 | AW671672 | BJ475920 | AV936751 |
| BP889345 | BW687141 | AW745389 | AW677235 | BJ475920 | AV936757 |
| BP889425 | DB723217 | AW745389 | AW677685 | BJ475920 | AV936763 |
| BP889475 | BW691106 | AW745389 | AW677746 | BJ475920 | AV936774 |
| BP889749 | DB716960 | AW745389 | AW677813 | BJ475920 | AV936797 |
| BP889768 | DB716960 | AW745389 | AW678129 | BJ475920 | AV936939 |
| BP889822 | DB683995 | AW745389 | AW678281 | BJ475920 | AV937019 |
| BP889837 | BP876577 | AW745389 | AW680159 | BJ475920 | AV937076 |
| BP889837 | BP882894 | AW745389 | AW680715 | BJ475920 | AV937209 |
| BP889837 | BP885058 | AW745389 | AW680938 | BJ475920 | BJ471598 |
| BP889837 | BP895083 | AW745389 | AW745529 | BJ475920 | BJ472797 |
| BP889854 | DB681596 | AW745389 | AW746353 | BJ475920 | BJ473492 |
| BP889892 | BP880078 | AW745389 | AW746518 | BJ475920 | BJ473511 |
| BP889924 | BP894898 | AW745389 | AW747096 | BJ475920 | BJ473798 |
| BP889932 | BP887668 | AW745389 | AW747475 | BJ475920 | BJ473908 |
| BP890090 | BP895811 | AW745389 | AW747484 | BJ475920 | BJ474094 |
| BP890104 | DB714138 | AW745389 | AW924836 | BJ475920 | BJ474123 |
| BP890252 | DB700735 | AW745389 | BE361811 | BJ475920 | BJ474193 |
| BP890514 | DB681596 | AW745389 | BE363239 | BJ475920 | BJ474377 |
| BP890546 | BP905552 | AW745389 | BE593064 | BJ475920 | BJ474409 |
| BP890549 | BW687541 | AW745389 | BE593753 | BJ475920 | BJ474424 |
| BP890549 | BW688181 | AW745389 | BE593807 | BJ475920 | BJ474578 |
| BP890564 | DB700735 | AW745389 | BE917956 | BJ475920 | BJ474671 |
| BP890587 | BW689483 | AW745389 | BF657374 | BJ475920 | BJ474736 |
| BP890599 | DB683995 | AW745389 | BG047934 | BJ475920 | BJ474738 |
| BP890636 | BW689483 | AW745389 | BG048011 | BJ475920 | BJ474777 |
| BP890674 | BP880078 | AW745389 | BG048980 | BJ475920 | BJ474995 |
| BP890787 | BP889773 | AW745389 | BG049106 | BJ475920 | BJ475061 |
| BP890970 | BP880078 | AW745389 | BG049355 | BJ475920 | BJ475188 |
| BP890994 | BP889625 | AW745389 | BG053984 | BJ475920 | BJ475234 |
| BP890994 | BP903960 | AW745389 | BG240867 | BJ475920 | BJ475328 |
| BP891034 | BP903032 | AW745389 | BG240943 | BJ475920 | BJ475362 |
| BP891046 | BP889584 | AW745389 | BG356801 | BJ475920 | BJ475374 |
| BP891046 | BP910755 | AW745389 | BG464673 | BJ475920 | BJ475377 |
| BP891046 | BW685434 | AW745389 | CF072686 | BJ475920 | BJ475396 |
| BP891076 | BP883136 | AW745389 | EB724767 | BJ475920 | BJ475398 |
| BP891146 | DB680885 | AW745432 | BE917879 | BJ475920 | BJ475560 |
| BP891174 | DB680885 | AW745432 | CN129985 | BJ475920 | BJ475699 |
| BP891193 | BP895492 | AW745445 | BE917879 | BJ475920 | BJ475968 |
| BP891278 | BP892464 | AW745445 | CN129985 | BJ475920 | BJ475988 |
| BP891327 | BW688830 | AW745489 | CD424940 | BJ475920 | BJ476013 |
| BP891327 | BW689228 | AW745489 | CD430703 | BJ475920 | BJ476099 |
| BP891340 | BP899641 | AW745489 | CD463078 | BJ475920 | BJ476123 |
| BP891587 | BP887668 | AW745492 | CN129985 | BJ475920 | BJ476125 |
| BP891629 | BW692368 | AW745493 | CN125516 | BJ475920 | BJ476133 |
| BP891733 | BP890893 | AW745505 | BE917879 | BJ475920 | BJ476236 |
| BP891733 | BW686275 | AW745603 | BE917879 | BJ475920 | BJ476265 |
| BP891733 | BW689471 | AW745606 | BG356685 | BJ475920 | BJ476319 |
| BP891738 | BP903032 | AW745611 | CN124691 | BJ475920 | BJ476481 |
| BP891817 | BW692510 | AW745936 | CD429539 | BJ475920 | BJ476557 |

|          |          |          |          |          |          |
|----------|----------|----------|----------|----------|----------|
| BP891872 | DB715097 | AW746227 | CD429539 | BJ475920 | BJ476815 |
| BP892093 | BP900789 | AW746259 | BM318702 | BJ475920 | BJ476959 |
| BP892148 | BW686666 | AW746345 | AW285447 | BJ475920 | BJ476963 |
| BP892161 | BP894472 | AW746388 | CX610209 | BJ475920 | BJ477237 |
| BP892161 | BP902541 | AW746410 | AW678537 | BJ475920 | BJ477450 |
| BP892161 | DB696010 | AW746557 | BE917879 | BJ475920 | BJ477490 |
| BP892161 | DB700609 | AW746557 | CN129985 | BJ475920 | BJ477495 |
| BP892161 | DB700986 | AW746745 | CN128418 | BJ475920 | BJ477532 |
| BP892161 | DB714160 | AW746810 | CN128418 | BJ475920 | BJ477533 |
| BP892161 | DB718189 | AW746900 | AW679970 | BJ475920 | BY859113 |
| BP892227 | DB680885 | AW746900 | AW681169 | BJ475952 | AV936473 |
| BP892260 | BP895491 | AW746941 | CD426822 | BJ475952 | BJ470741 |
| BP892313 | BW689483 | AW746955 | AW923230 | BJ475952 | BJ470756 |
| BP892324 | DB680885 | AW746955 | BE355468 | BJ475952 | BJ475566 |
| BP892345 | BP895491 | AW746955 | BE598583 | BJ476075 | BJ476193 |
| BP892377 | BP894898 | AW746955 | BG464630 | BJ476079 | BJ476193 |
| BP892438 | BP878322 | AW746955 | BG948276 | BJ476104 | BJ469152 |
| BP892438 | BP900603 | AW746955 | BI245768 | BJ476174 | AV935452 |
| BP892438 | DB687977 | AW746955 | BM329742 | BJ476174 | BJ473567 |
| BP892438 | DB712708 | AW746955 | BM330113 | BJ476316 | AV932787 |
| BP892438 | DB719777 | AW746955 | BM331262 | BJ476316 | AV932788 |
| BP892484 | DB703982 | AW746955 | CF073731 | BJ476316 | AV935421 |
| BP892484 | DB708150 | AW746955 | CF073761 | BJ476316 | BJ472802 |
| BP892493 | BP898148 | AW746955 | CF430697 | BJ476316 | BJ474144 |
| BP892493 | BP900851 | AW746955 | CN124035 | BJ476332 | AV920113 |
| BP892493 | BP902030 | AW747007 | AW677645 | BJ476332 | AV927513 |
| BP892493 | BP903374 | AW747007 | AW678862 | BJ476332 | AV928957 |
| BP892493 | DB696278 | AW747007 | AW745880 | BJ476332 | AV929591 |
| BP892540 | BP892464 | AW747007 | AW746051 | BJ476332 | AV930737 |
| BP892540 | BP894898 | AW747007 | AW924830 | BJ476332 | AV931515 |
| BP892589 | BP880808 | AW747007 | AW925140 | BJ476332 | AV934234 |
| BP892623 | DB691126 | AW747007 | BE363223 | BJ476332 | AV934655 |
| BP892631 | DB688392 | AW747007 | BE363273 | BJ476332 | AV934681 |
| BP892660 | BW690215 | AW747007 | BE592670 | BJ476332 | AV934928 |
| BP892662 | DB699072 | AW747042 | BE362178 | BJ476332 | AV934978 |
| BP892691 | BP887668 | AW747042 | BE363288 | BJ476332 | AV935100 |
| BP892742 | BP881281 | AW747053 | CN129985 | BJ476332 | AV935188 |
| BP892742 | BP882190 | AW747073 | BG054284 | BJ476332 | AV935410 |
| BP892742 | BP890096 | AW747221 | BE364048 | BJ476332 | AV935492 |
| BP892742 | BP890105 | AW747281 | BE125078 | BJ476332 | AV935494 |
| BP892742 | BP890448 | AW747281 | BG047793 | BJ476332 | AV935523 |
| BP892742 | BP890663 | AW747281 | BG357981 | BJ476332 | AV935539 |
| BP892742 | BP891208 | AW747281 | CN129613 | BJ476332 | AV935681 |
| BP892742 | BP891658 | AW747315 | AW924692 | BJ476332 | AV935823 |
| BP892742 | BP892198 | AW747315 | CF431138 | BJ476332 | AV935842 |
| BP892742 | BP892329 | AW747315 | CF434112 | BJ476332 | AV935878 |
| BP892742 | BP892531 | AW747424 | CN130221 | BJ476332 | AV936029 |
| BP892742 | BP892947 | AW747469 | BG462849 | BJ476332 | AV936084 |
| BP892742 | BP893895 | AW747477 | BG049463 | BJ476332 | AV936222 |
| BP892742 | BP893950 | AW747486 | BG048028 | BJ476332 | AV936266 |
| BP892742 | BP894278 | AW747486 | CD431843 | BJ476332 | AV936454 |
| BP892742 | BP894618 | AW747496 | CN124216 | BJ476332 | AV936475 |

|          |          |          |          |          |          |
|----------|----------|----------|----------|----------|----------|
| BP892742 | BP895361 | AW747597 | AW679012 | BJ476332 | AV936489 |
| BP892742 | BP895520 | AW747611 | AW681045 | BJ476332 | AV936689 |
| BP892742 | BP898141 | AW747683 | BG356814 | BJ476332 | AV936763 |
| BP892742 | BP903667 | AW922222 | CN129985 | BJ476332 | AV937135 |
| BP892742 | BP903777 | AW922322 | BG463927 | BJ476332 | BJ469485 |
| BP892742 | BP904098 | AW922379 | CX609539 | BJ476332 | BJ471501 |
| BP892742 | BP904546 | AW922379 | CX611342 | BJ476332 | BJ473492 |
| BP892742 | BP904791 | AW922417 | AW745849 | BJ476332 | BJ473589 |
| BP892742 | BP907307 | AW922417 | BG048993 | BJ476332 | BJ473699 |
| BP892742 | BW684957 | AW922417 | CF489906 | BJ476332 | BJ473805 |
| BP892742 | BW685049 | AW922507 | CN128524 | BJ476332 | BJ473820 |
| BP892742 | BW685096 | AW922675 | BG463307 | BJ476332 | BJ473871 |
| BP892742 | BW685630 | AW922730 | BE356382 | BJ476332 | BJ474123 |
| BP892742 | BW686077 | AW922730 | BE360289 | BJ476332 | BJ474193 |
| BP892742 | BW686165 | AW922730 | BE360645 | BJ476332 | BJ474736 |
| BP892742 | BW686766 | AW922730 | BE362451 | BJ476332 | BJ474777 |
| BP892742 | BW686941 | AW922730 | BE362697 | BJ476332 | BJ474995 |
| BP892742 | BW687033 | AW922730 | CX607210 | BJ476332 | BJ475061 |
| BP892742 | BW687121 | AW922730 | CX607217 | BJ476332 | BJ475152 |
| BP892742 | BW687400 | AW922730 | CX609186 | BJ476332 | BJ475188 |
| BP892742 | BW687419 | AW922730 | CX610169 | BJ476332 | BJ475234 |
| BP892742 | BW687649 | AW922784 | CF071426 | BJ476332 | BJ475328 |
| BP892742 | BW687767 | AW922990 | AW564126 | BJ476332 | BJ475398 |
| BP892742 | BW687916 | AW922990 | BG047679 | BJ476332 | BJ475491 |
| BP892742 | BW688007 | AW922990 | BG239807 | BJ476332 | BJ475627 |
| BP892742 | BW688045 | AW922990 | BG239817 | BJ476332 | BJ475699 |
| BP892742 | BW688381 | AW922990 | BG273405 | BJ476332 | BJ475738 |
| BP892742 | BW688462 | AW922990 | BG412373 | BJ476332 | BJ475988 |
| BP892742 | BW688528 | AW922990 | CX611213 | BJ476332 | BJ476013 |
| BP892742 | BW688625 | AW923034 | BG273284 | BJ476332 | BJ476319 |
| BP892742 | BW689172 | AW923034 | CX611289 | BJ476332 | BJ476572 |
| BP892742 | BW689294 | AW923095 | CN129985 | BJ476332 | BJ476815 |
| BP892742 | BW689435 | AW923317 | CD462024 | BJ476332 | BJ476851 |
| BP892742 | BW689682 | AW923317 | CN127223 | BJ476332 | BJ477400 |
| BP892742 | BW689769 | AW923538 | BE355511 | BJ476332 | BJ477490 |
| BP892742 | BW689918 | AW923538 | BI098546 | BJ476332 | BJ477533 |
| BP892742 | BW689988 | AW923538 | CX606254 | BJ476332 | BY862140 |
| BP892742 | BW690389 | AW923538 | CX610824 | BJ476358 | AV932263 |
| BP892742 | BW690407 | AW923668 | CD426047 | BJ476358 | AV934216 |
| BP892742 | BW690535 | AW923668 | EB725785 | BJ476358 | AV935105 |
| BP892742 | BW691048 | AW923995 | CN129985 | BJ476358 | BJ470741 |
| BP892742 | BW691244 | AW924008 | BE917879 | BJ476373 | AV935452 |
| BP892742 | BW691987 | AW924065 | CX610209 | BJ476373 | BJ473567 |
| BP892742 | BW692131 | AW924188 | AW745849 | BJ476373 | BJ476193 |
| BP892742 | BW692135 | AW924188 | BG049510 | BJ476404 | BJ472260 |
| BP892742 | BW692374 | AW924188 | CF428739 | BJ476411 | AV935452 |
| BP892742 | BW692556 | AW924214 | BE355021 | BJ476411 | BJ473567 |
| BP892742 | BW692783 | AW924365 | BE355021 | BJ476440 | AV928081 |
| BP892742 | BW692786 | AW924504 | BE917879 | BJ476465 | AV935452 |
| BP892742 | BW692816 | AW924504 | CD428256 | BJ476474 | AV923724 |
| BP892742 | DB684795 | AW924504 | CN129985 | BJ476486 | BJ475566 |
| BP892742 | DB693017 | AW924536 | AW681045 | BJ476503 | BJ468827 |

|          |          |          |          |          |          |
|----------|----------|----------|----------|----------|----------|
| BP892742 | DB717352 | AW924550 | AW681045 | BJ476533 | AV923205 |
| BP892742 | DB724276 | AW924585 | AW681045 | BJ476533 | BJ476143 |
| BP892760 | BW686572 | AW924619 | BG464685 | BJ476565 | AV932263 |
| BP892766 | BW689483 | AW924619 | BI211894 | BJ476565 | AV934216 |
| BP892904 | BW689483 | AW924619 | CD427254 | BJ476565 | AV935105 |
| BP892917 | DB684773 | AW924757 | BE363092 | BJ476565 | BJ470741 |
| BP892917 | DB690379 | AW924801 | BG049463 | BJ476596 | BJ475104 |
| BP892917 | DB694534 | AW924803 | CN128798 | BJ476605 | AV925248 |
| BP892939 | BW689483 | AW924883 | CF428739 | BJ476605 | AV927019 |
| BP892949 | DB710277 | AW924913 | BE358788 | BJ476605 | AV930401 |
| BP893012 | BP877976 | AW924990 | AW287690 | BJ476679 | BY867053 |
| BP893012 | BP879734 | AW924990 | BG054412 | BJ476694 | AV933334 |
| BP893012 | BP886625 | AW924990 | BG412870 | BJ476726 | AV925248 |
| BP893012 | BP890565 | AW924990 | CD430557 | BJ476726 | AV927019 |
| BP893012 | BP892380 | AW924990 | CF427086 | BJ476726 | AV930401 |
| BP893012 | BW691249 | AW924992 | BE917879 | BJ476745 | BJ546915 |
| BP893012 | DB715619 | AW924992 | CD428256 | BJ476745 | BJ547463 |
| BP893012 | DB722849 | AW924992 | CN129985 | BJ476798 | AV920065 |
| BP893031 | BP903032 | AW925013 | CN125736 | BJ476801 | AV927164 |
| BP893050 | BP880078 | AW925078 | BG463927 | BJ476801 | AV933117 |
| BP893068 | BP875702 | AW925107 | CN123959 | BJ476801 | BJ469658 |
| BP893068 | BP876412 | BE125017 | AW924353 | BJ476801 | BJ475724 |
| BP893068 | BP885401 | BE125017 | BG322716 | BJ476801 | BJ476190 |
| BP893068 | BP890457 | BE125017 | CF071149 | BJ476944 | AV935452 |
| BP893068 | BP891184 | BE125017 | CF486643 | BJ476944 | BJ473567 |
| BP893068 | BP891581 | BE125017 | CN124729 | BJ476944 | BJ476193 |
| BP893068 | BP891672 | BE125017 | CN125236 | BJ476953 | AV920065 |
| BP893068 | BP891683 | BE125017 | CN125729 | BJ476970 | BJ467998 |
| BP893068 | BP892846 | BE125017 | CN127550 | BJ476977 | AV927924 |
| BP893068 | BP892909 | BE125017 | CN128305 | BJ476977 | AV928352 |
| BP893068 | BP892926 | BE125017 | CN130146 | BJ476977 | AV929500 |
| BP893068 | BP893196 | BE125017 | CX610433 | BJ476977 | AV932491 |
| BP893068 | BP893372 | BE125025 | BE917879 | BJ476977 | AV932793 |
| BP893068 | BP893783 | BE125025 | CD428256 | BJ476977 | AV933898 |
| BP893068 | BP894339 | BE125025 | CN129985 | BJ476977 | AV935188 |
| BP893068 | BP894630 | BE125123 | AW745884 | BJ476977 | AV935340 |
| BP893068 | BP894840 | BE125123 | BG054447 | BJ476977 | AV935410 |
| BP893068 | BP895065 | BE125156 | CD429783 | BJ476977 | AV935494 |
| BP893068 | BW685252 | BE125262 | CD432683 | BJ476977 | AV935539 |
| BP893068 | BW687523 | BE125335 | CN129985 | BJ476977 | AV935630 |
| BP893068 | BW687688 | BE125647 | CN125376 | BJ476977 | AV935738 |
| BP893068 | BW687819 | BE125832 | BE592105 | BJ476977 | AV935823 |
| BP893068 | BW688756 | BE125832 | BE918604 | BJ476977 | AV936074 |
| BP893068 | BW688959 | BE125882 | AW671734 | BJ476977 | AV936136 |
| BP893068 | BW691684 | BE125906 | AW285967 | BJ476977 | AV936345 |
| BP893068 | BW692414 | BE125906 | AW922600 | BJ476977 | AV936418 |
| BP893068 | BW692519 | BE125906 | BE918183 | BJ476977 | AV936453 |
| BP893068 | BW692617 | BE125906 | CN130463 | BJ476977 | AV936688 |
| BP893068 | DB682699 | BE125920 | AW672547 | BJ476977 | AV936751 |
| BP893132 | BP881465 | BE125920 | BE596574 | BJ476977 | AV936757 |
| BP893277 | DB680885 | BE125920 | BG463570 | BJ476977 | AV936763 |
| BP893280 | BW692510 | BE125920 | BG463610 | BJ476977 | AV936797 |



|          |          |          |          |          |          |
|----------|----------|----------|----------|----------|----------|
| BP893323 | DB680885 | BE125920 | BG463884 | BJ476977 | AV936939 |
| BP893444 | BP881098 | BE125920 | BG465035 | BJ476977 | AV937076 |
| BP893466 | BP887668 | BE125920 | CD424541 | BJ476977 | AV937209 |
| BP893565 | BP878398 | BE126077 | BM328500 | BJ476977 | BJ472797 |
| BP893597 | DB722910 | BE352878 | BG948748 | BJ476977 | BJ473511 |
| BP893597 | DB724850 | BE352878 | CX608695 | BJ476977 | BJ473798 |
| BP893626 | BP891377 | BE352914 | BM328500 | BJ476977 | BJ473908 |
| BP893626 | BP895243 | BE354962 | BE125739 | BJ476977 | BJ474094 |
| BP893626 | BW687488 | BE354962 | BG054155 | BJ476977 | BJ474123 |
| BP893626 | DB692665 | BE354962 | BG357888 | BJ476977 | BJ474193 |
| BP893684 | BP895811 | BE354962 | BG463890 | BJ476977 | BJ474409 |
| BP893727 | BP876767 | BE354962 | BG948468 | BJ476977 | BJ474578 |
| BP893727 | BP891452 | BE354962 | BG948607 | BJ476977 | BJ474738 |
| BP893727 | BP893211 | BE354962 | BG948760 | BJ476977 | BJ474777 |
| BP893860 | BW691106 | BE354962 | CF430529 | BJ476977 | BJ474995 |
| BP893939 | BP888323 | BE354962 | CF434211 | BJ476977 | BJ475188 |
| BP893939 | BW688309 | BE354962 | CN128992 | BJ476977 | BJ475234 |
| BP893939 | BW692203 | BE354962 | CN129459 | BJ476977 | BJ475362 |
| BP893939 | DB688047 | BE354962 | CN130437 | BJ476977 | BJ475374 |
| BP893939 | DB688319 | BE354962 | CX609258 | BJ476977 | BJ475560 |
| BP893939 | DB724775 | BE355012 | AW678443 | BJ476977 | BJ475699 |
| BP893975 | BP895491 | BE355080 | CD463035 | BJ476977 | BJ475988 |
| BP894019 | BP880598 | BE355123 | BM328500 | BJ476977 | BJ476099 |
| BP894019 | DB686700 | BE355179 | BM323243 | BJ476977 | BJ476125 |
| BP894019 | DB704346 | BE355202 | AW923817 | BJ476977 | BJ476133 |
| BP894103 | BP882161 | BE355374 | AW671525 | BJ476977 | BJ476319 |
| BP894120 | BP895243 | BE355374 | AW744884 | BJ476977 | BJ476557 |
| BP894120 | BW687488 | BE355374 | BE125739 | BJ476977 | BJ476763 |
| BP894187 | DB710277 | BE355374 | BE359342 | BJ476977 | BJ476963 |
| BP894223 | DB683995 | BE355374 | BG355424 | BJ476977 | BJ477490 |
| BP894291 | BP892464 | BE355374 | BI076253 | BJ476977 | BJ477532 |
| BP894319 | BW691106 | BE355374 | CF431340 | BJ477031 | BJ476193 |
| BP894397 | DB687791 | BE355374 | CF433823 | BJ477068 | AV932114 |
| BP894510 | DB715392 | BE355374 | CF434211 | BJ477068 | BJ471177 |
| BP894547 | BP893854 | BE355374 | CF485752 | BJ477068 | BJ471393 |
| BP894700 | DB683995 | BE355374 | CN124304 | BJ477068 | BJ473809 |
| BP894787 | BW691106 | BE355374 | CN127349 | BJ477166 | AV934216 |
| BP894886 | DB714454 | BE355374 | CN129459 | BJ477166 | AV935105 |
| BP894956 | DB726640 | BE355374 | CN130454 | BJ477166 | BJ470741 |
| BP894980 | BP890324 | BE355374 | CX606528 | BJ477171 | BJ472390 |
| BP895066 | DB704863 | BE355374 | CX606560 | BJ477266 | AV925248 |
| BP895068 | BP892464 | BE355374 | CX606947 | BJ477266 | AV927019 |
| BP895068 | BP894898 | BE355374 | CX611300 | BJ477266 | AV930401 |
| BP895104 | DB683641 | BE355456 | AW679012 | BJ477274 | AV927924 |
| BP895145 | BP900789 | BE355644 | BE355511 | BJ477274 | AV928352 |
| BP895216 | DB726822 | BE355644 | BI098546 | BJ477274 | AV929500 |
| BP895233 | DB681700 | BE355644 | CX606254 | BJ477274 | AV932491 |
| BP895233 | DB683995 | BE355644 | CX610824 | BJ477274 | AV932793 |
| BP895233 | DB703982 | BE355650 | AW747025 | BJ477274 | AV933898 |
| BP895233 | DB708150 | BE355650 | AW922131 | BJ477274 | AV935188 |
| BP895318 | DB681700 | BE355650 | AW923456 | BJ477274 | AV935340 |
| BP895318 | DB683995 | BE355650 | BE597166 | BJ477274 | AV935410 |

|          |          |          |          |          |          |
|----------|----------|----------|----------|----------|----------|
| BP895318 | DB708150 | BE355650 | CX609029 | BJ477274 | AV935494 |
| BP895333 | BP904055 | BE355770 | BG411458 | BJ477274 | AV935539 |
| BP895394 | DB699639 | BE356432 | BE600810 | BJ477274 | AV935630 |
| BP895394 | DB703668 | BE356473 | AW679012 | BJ477274 | AV935738 |
| BP895498 | BP881407 | BE356717 | AW671921 | BJ477274 | AV935823 |
| BP895498 | BP895576 | BE356717 | CF074064 | BJ477274 | AV936074 |
| BP895498 | BW687373 | BE356797 | BE367409 | BJ477274 | AV936136 |
| BP895498 | DB708653 | BE356797 | CF072065 | BJ477274 | AV936345 |
| BP895498 | DB713207 | BE356861 | CN129985 | BJ477274 | AV936418 |
| BP895498 | DB719753 | BE356948 | BE360727 | BJ477274 | AV936453 |
| BP895607 | BP907790 | BE356948 | BE918416 | BJ477274 | AV936688 |
| BP895640 | BW684972 | BE356948 | BF177063 | BJ477274 | AV936751 |
| BP895734 | BP894898 | BE356948 | BF177100 | BJ477274 | AV936757 |
| BP895927 | DB679674 | BE356948 | BG323033 | BJ477274 | AV936763 |
| BP895959 | BP897648 | BE356948 | BG323082 | BJ477274 | AV936797 |
| BP896064 | BP897648 | BE356948 | BI099607 | BJ477274 | AV936939 |
| BP896084 | BP899641 | BE356948 | BM327611 | BJ477274 | AV937076 |
| BP896112 | BP877566 | BE356948 | BM327894 | BJ477274 | AV937209 |
| BP896128 | DB692671 | BE356948 | CD462395 | BJ477274 | BJ472797 |
| BP896129 | BP886772 | BE357150 | AW679012 | BJ477274 | BJ473511 |
| BP896129 | BP900394 | BE357200 | AW679012 | BJ477274 | BJ473798 |
| BP896129 | BW686228 | BE357231 | BE361931 | BJ477274 | BJ473908 |
| BP896129 | DB696075 | BE357231 | CN124812 | BJ477274 | BJ474094 |
| BP896129 | DB704961 | BE357255 | AW678143 | BJ477274 | BJ474123 |
| BP896129 | DB705821 | BE357255 | AW680711 | BJ477274 | BJ474193 |
| BP896129 | DB708207 | BE357255 | AW922326 | BJ477274 | BJ474409 |
| BP896129 | DB710466 | BE357255 | BE352861 | BJ477274 | BJ474578 |
| BP896129 | DB714858 | BE357255 | BE353075 | BJ477274 | BJ474738 |
| BP896129 | DB724770 | BE357255 | BE353111 | BJ477274 | BJ474777 |
| BP896129 | DB724794 | BE357255 | BE361122 | BJ477274 | BJ474995 |
| BP896178 | DB679674 | BE357255 | BE917637 | BJ477274 | BJ475188 |
| BP896210 | DB694856 | BE357255 | BE918000 | BJ477274 | BJ475234 |
| BP896292 | BP897648 | BE357255 | BG049271 | BJ477274 | BJ475560 |
| BP896391 | BP881448 | BE357255 | BG240658 | BJ477274 | BJ475699 |
| BP896391 | BP901135 | BE357255 | BG356783 | BJ477274 | BJ475988 |
| BP896401 | BP896643 | BE357255 | BG933246 | BJ477274 | BJ476099 |
| BP896409 | DB723345 | BE357255 | CD462659 | BJ477274 | BJ476125 |
| BP896477 | DB727664 | BE357455 | CX611795 | BJ477274 | BJ476133 |
| BP896491 | DB723217 | BE357485 | BI643600 | BJ477274 | BJ476319 |
| BP896555 | DB727664 | BE357504 | CN125722 | BJ477274 | BJ476557 |
| BP896573 | DB720755 | BE357555 | CX611421 | BJ477274 | BJ476763 |
| BP896591 | BP882414 | BE357580 | BF657690 | BJ477274 | BJ476963 |
| BP896591 | DB679119 | BE357583 | CD429605 | BJ477274 | BJ477490 |
| BP896591 | DB681494 | BE357635 | CD429539 | BJ477274 | BJ477532 |
| BP896591 | DB683518 | BE357763 | CD424632 | BJ477349 | AV935452 |
| BP896591 | DB690666 | BE357961 | CX610162 | BJ477349 | BJ473567 |
| BP896591 | DB690755 | BE358027 | BE601093 | BJ477455 | BJ472390 |
| BP896591 | DB693248 | BE358027 | BM324575 | BJ546855 | AV932642 |
| BP896591 | DB705879 | BE358027 | CX607807 | BJ546855 | BJ469617 |
| BP896702 | BP885631 | BE358094 | BG322700 | BJ546882 | BY861274 |
| BP896778 | BP900248 | BE358094 | CF433663 | BJ546887 | AV933765 |
| BP896787 | BP907706 | BE358362 | AW285894 | BJ546895 | AV934445 |

|          |          |          |          |          |          |
|----------|----------|----------|----------|----------|----------|
| BP896787 | BP908367 | BE358362 | AW286136 | BJ546905 | AV933765 |
| BP896790 | DB679674 | BE358362 | AW286940 | BJ546948 | AV933765 |
| BP896811 | BP900400 | BE358362 | AW564510 | BJ546989 | BJ472784 |
| BP896811 | DB706704 | BE358362 | AW564867 | BJ547078 | AV933765 |
| BP896820 | BP897972 | BE358362 | AW671025 | BJ547078 | AV934445 |
| BP896830 | DB714454 | BE358362 | AW671525 | BJ547084 | AV933765 |
| BP896845 | BP899641 | BE358362 | AW744884 | BJ547145 | BJ471504 |
| BP896849 | DB710028 | BE358362 | BE125739 | BJ547145 | BJ472784 |
| BP897007 | BP897648 | BE358362 | BE125887 | BJ547233 | AV933765 |
| BP897114 | BP876172 | BE358362 | BE358341 | BJ547260 | BJ475847 |
| BP897114 | BP878758 | BE358362 | BE359342 | BJ547260 | BJ476110 |
| BP897114 | BP879236 | BE358362 | BF177145 | BJ547268 | AV926577 |
| BP897114 | BP882099 | BE358362 | BG355424 | BJ547268 | BY842254 |
| BP897114 | BP885526 | BE358362 | BG946971 | BJ547315 | BJ471504 |
| BP897114 | BP896274 | BE358362 | BG947995 | BJ547315 | BJ472784 |
| BP897114 | BP896435 | BE358362 | BG948468 | BJ547315 | BJ476764 |
| BP897114 | BP896542 | BE358362 | BG948607 | BJ547325 | AV932238 |
| BP897114 | BP896963 | BE358362 | BG948760 | BJ547336 | AV934445 |
| BP897114 | BP897106 | BE358362 | BI075807 | BJ547348 | AV934445 |
| BP897114 | BP897233 | BE358362 | BI075997 | BJ547385 | AV934274 |
| BP897114 | BP897400 | BE358362 | BI075998 | BJ547385 | BJ470796 |
| BP897114 | BP897563 | BE358362 | BI076253 | BJ547428 | BJ475847 |
| BP897114 | BP897672 | BE358362 | BI098932 | BJ547497 | AV933765 |
| BP897114 | BP897872 | BE358362 | BI140061 | BJ547592 | BJ471504 |
| BP897114 | BP898162 | BE358362 | BI211277 | BJ547592 | BJ472784 |
| BP897114 | BP898299 | BE358362 | BI211283 | BJ547616 | AV933765 |
| BP897114 | BP898743 | BE358362 | BI245898 | BJ547665 | AV933765 |
| BP897114 | BP898863 | BE358362 | BI246040 | BJ547665 | BJ547272 |
| BP897114 | BP898892 | BE358362 | BI246142 | BJ547687 | BJ471504 |
| BP897114 | BP899090 | BE358362 | CF427446 | BJ547687 | BJ472784 |
| BP897114 | BP900041 | BE358362 | CF429076 | BJ547731 | BJ471504 |
| BP897114 | BP900601 | BE358362 | CF430687 | BJ547731 | BJ472784 |
| BP897114 | BP900726 | BE358362 | CF431340 | BJ547731 | BJ476764 |
| BP897114 | BP901092 | BE358362 | CF431904 | BJ547731 | BJ547044 |
| BP897114 | BP902263 | BE358362 | CF433823 | BJ547752 | BJ472784 |
| BP897114 | BP908548 | BE358362 | CF434211 | BJ547773 | AU090126 |
| BP897114 | BP908683 | BE358362 | CF485752 | BJ547927 | BY861274 |
| BP897114 | BP909393 | BE358362 | CN124304 | BJ547955 | BJ476764 |
| BP897114 | BP911171 | BE358362 | CN127349 | BJ547991 | BJ470999 |
| BP897144 | BP876394 | BE358362 | CN128992 | BJ548027 | AV920597 |
| BP897144 | BP877717 | BE358362 | CN129459 | BJ548035 | BJ470999 |
| BP897144 | BP878329 | BE358362 | CN130454 | BJ548040 | BJ471504 |
| BP897144 | BP885137 | BE358362 | CX606528 | BJ548040 | BJ472784 |
| BP897144 | BP887203 | BE358362 | CX606560 | BJ548042 | BY861274 |
| BP897144 | BP889235 | BE358362 | CX606947 | BJ548051 | AV936530 |
| BP897144 | BP895906 | BE358362 | CX610743 | BJ548180 | BY861274 |
| BP897144 | BP896261 | BE358362 | CX611300 | BJ548257 | BJ472784 |
| BP897144 | BP896631 | BE358362 | CX612090 | BJ548257 | BJ476764 |
| BP897144 | BP896819 | BE358380 | BE360362 | BJ548450 | BJ475847 |
| BP897144 | BP896874 | BE358489 | BG355430 | BJ548486 | AV935920 |
| BP897144 | BP896951 | BE358521 | BE360362 | BJ548486 | BJ475847 |
| BP897144 | BP897681 | BE358649 | AW282933 | BJ548486 | BJ476110 |

|          |          |          |          |          |          |
|----------|----------|----------|----------|----------|----------|
| BP897144 | BP899599 | BE358649 | AW747063 | BJ548510 | BJ470999 |
| BP897144 | BP900633 | BE358649 | BG357130 | BJ548514 | BJ470999 |
| BP897144 | BP900679 | BE358669 | CF070742 | BJ548530 | AV915113 |
| BP897144 | BP901187 | BE358669 | CX609381 | BJ548530 | BJ462535 |
| BP897144 | BP902212 | BE358748 | BG048059 | BJ548530 | BJ462542 |
| BP897144 | BP907074 | BE358748 | BG463551 | BJ548530 | BJ472018 |
| BP897144 | BP910475 | BE358748 | BM328169 | BJ548530 | BY841130 |
| BP897178 | DB699273 | BE358832 | BM324186 | BJ548553 | BJ470999 |
| BP897208 | BP897920 | BE358905 | AW922450 | BJ548664 | AV936530 |
| BP897217 | BP907817 | BE358905 | BG947009 | BJ548670 | BJ470999 |
| BP897227 | DB708151 | BE358905 | BI140377 | BJ548750 | BJ472784 |
| BP897248 | BP899641 | BE358905 | CD432216 | BJ548763 | AV917976 |
| BP897263 | DB702511 | BE358905 | CF073913 | BJ548820 | BJ476764 |
| BP897281 | BP884284 | BE358905 | CF489083 | BJ548883 | BJ472784 |
| BP897281 | BP885467 | BE358984 | BE597658 | BJ548910 | AV936530 |
| BP897281 | BP887605 | BE358984 | BE600688 | BJ548914 | BJ472784 |
| BP897281 | DB697219 | BE358996 | AW283471 | BJ548914 | BJ476764 |
| BP897281 | DB705043 | BE358996 | AW678562 | BJ548974 | AV936530 |
| BP897310 | BP897920 | BE358996 | AW679779 | BJ548997 | BJ471504 |
| BP897398 | BP882099 | BE358996 | AW680014 | BJ548997 | BJ472784 |
| BP897398 | BP888656 | BE358996 | AW680477 | BJ548997 | BJ476764 |
| BP897398 | BP888657 | BE358996 | AW680734 | BJ549223 | BJ549125 |
| BP897398 | BP889175 | BE358996 | AW680854 | BJ549291 | AV919218 |
| BP897398 | BP896274 | BE358996 | AW745708 | BJ549291 | AV930621 |
| BP897398 | BP896435 | BE358996 | AW745711 | BJ549291 | BJ474709 |
| BP897398 | BP896542 | BE358996 | AW746537 | BJ549352 | AV932384 |
| BP897398 | BP897106 | BE358996 | AW922935 | BJ549352 | BJ469617 |
| BP897398 | BP897233 | BE358996 | AW924600 | BJ549488 | BJ549125 |
| BP897398 | BP897339 | BE358996 | BE357124 | BJ549561 | AV917501 |
| BP897398 | BP897563 | BE358996 | BE360174 | BJ549572 | AU090073 |
| BP897398 | BP897872 | BE358996 | BE363164 | BJ549572 | AU090075 |
| BP897398 | BP898117 | BE358996 | BE593317 | BJ549577 | AV932642 |
| BP897398 | BP898162 | BE358996 | BG159423 | BJ549745 | BJ469617 |
| BP897398 | BP898743 | BE358996 | BG933600 | BJ549860 | AV913145 |
| BP897398 | BP898892 | BE358996 | BM317796 | BJ549877 | AV913145 |
| BP897398 | BP899317 | BE358996 | CN124166 | BJ549877 | AV918435 |
| BP897398 | BP900041 | BE358996 | CN124654 | BJ549947 | AV913145 |
| BP897398 | BP900148 | BE358996 | CN124741 | BJ550020 | AV918435 |
| BP897398 | BP900173 | BE358996 | CN124772 | BJ550041 | AV919218 |
| BP897398 | BP901040 | BE358996 | CN125553 | BJ550041 | AV919843 |
| BP897398 | BP901092 | BE358996 | CN125745 | BJ550041 | AV930621 |
| BP897398 | BP901868 | BE358996 | CN126124 | BJ550041 | BJ473382 |
| BP897398 | BP902263 | BE358996 | CN126339 | BJ550041 | BJ474709 |
| BP897398 | BP908548 | BE358996 | CN126473 | BJ550080 | AV913145 |
| BP897398 | BP908683 | BE358996 | CN126574 | BJ550080 | AV918435 |
| BP897398 | BP909393 | BE358996 | CN126906 | BJ550198 | AU090073 |
| BP897398 | BP911171 | BE358996 | CN127195 | BJ550198 | AU090075 |
| BP897398 | DB681667 | BE358996 | CN127473 | BJ550237 | AV912816 |
| BP897398 | DB681725 | BE358996 | CN127560 | BY835775 | BY836441 |
| BP897436 | BP899641 | BE358996 | CN127607 | BY835788 | BY836441 |
| BP897446 | DB727664 | BE358996 | CN128247 | BY835840 | BY836441 |
| BP897450 | BP896555 | BE358996 | CN128290 | BY835921 | BY846520 |

|          |          |          |          |          |          |
|----------|----------|----------|----------|----------|----------|
| BP897450 | BP897446 | BE358996 | CN128329 | BY835927 | AV932263 |
| BP897450 | BP897642 | BE358996 | CN129644 | BY835927 | AV934216 |
| BP897450 | DB679514 | BE358996 | CN130248 | BY835927 | BJ475566 |
| BP897450 | DB703800 | BE358996 | CN130631 | BY836301 | AV915668 |
| BP897478 | BP897648 | BE358996 | CN131002 | BY836331 | AV915668 |
| BP897493 | DB702511 | BE358996 | CN131473 | BY836406 | AV914590 |
| BP897548 | BP887015 | BE358996 | CX608379 | BY836406 | BY853967 |
| BP897562 | DB706497 | BE358996 | CX612049 | BY836436 | BY836441 |
| BP897611 | DB683540 | BE359278 | CF482261 | BY836514 | BY836441 |
| BP897642 | DB727664 | BE359339 | AW679012 | BY836624 | AV919492 |
| BP897699 | BW691368 | BE359668 | CD424632 | BY836984 | BJ549125 |
| BP897699 | DB689776 | BE359699 | BE600810 | BY837001 | BJ472627 |
| BP897699 | DB695560 | BE359946 | BG412381 | BY837197 | BY836441 |
| BP897699 | DB700089 | BE359946 | BG463644 | BY837312 | AV919492 |
| BP897699 | DB725471 | BE360010 | CF480574 | BY837343 | AV915668 |
| BP897722 | DB710076 | BE360031 | CF072007 | BY837401 | BY836441 |
| BP897828 | DB686581 | BE360080 | BE365890 | BY837508 | BY835737 |
| BP897828 | DB714386 | BE360088 | CN129985 | BY837508 | BY836437 |
| BP897950 | BP875880 | BE360399 | BE125200 | BY837508 | BY836611 |
| BP897985 | BP896989 | BE360399 | BE362512 | BY837508 | BY837913 |
| BP897985 | BP898164 | BE360399 | CD463761 | BY837508 | BY838608 |
| BP897985 | BP898647 | BE360399 | CF427739 | BY837508 | BY839210 |
| BP897985 | BP898720 | BE360630 | AW679012 | BY837508 | BY841139 |
| BP897985 | BP899757 | BE360750 | BE599274 | BY837508 | BY841833 |
| BP897985 | BP900552 | BE360750 | BG049523 | BY837508 | BY842981 |
| BP897985 | BP900584 | BE360750 | BG356941 | BY837508 | BY843688 |
| BP897985 | BP902143 | BE360750 | BM328217 | BY837508 | BY843713 |
| BP897985 | BP906159 | BE360750 | BM328516 | BY837754 | BY836441 |
| BP897985 | BP909620 | BE360750 | CD429576 | BY837912 | BY836441 |
| BP897985 | DB697644 | BE360750 | CF429269 | BY837946 | BY836441 |
| BP898024 | DB683451 | BE360750 | CN127115 | BY837955 | AV923049 |
| BP898121 | DB707996 | BE360750 | CX607555 | BY837955 | AV923069 |
| BP898145 | BW692892 | BE360862 | BE356291 | BY837955 | AV923781 |
| BP898188 | DB702511 | BE360862 | BE356709 | BY837955 | AV924136 |
| BP898223 | DB697092 | BE360862 | BG411311 | BY837955 | AV924269 |
| BP898225 | BP880808 | BE360862 | CD429786 | BY837955 | AV925905 |
| BP898266 | DB716750 | BE360918 | CF428636 | BY837955 | AV926148 |
| BP898294 | BP888615 | BE360984 | CF071518 | BY837955 | AV926222 |
| BP898294 | DB699633 | BE361192 | CF073513 | BY837955 | AV926559 |
| BP898294 | DB718840 | BE361206 | BE597237 | BY837955 | AV927636 |
| BP898346 | BP897648 | BE361599 | BM329939 | BY837955 | AV928677 |
| BP898347 | BP900789 | BE361967 | BI643600 | BY837955 | AV928678 |
| BP898353 | DB711225 | BE362090 | CF487287 | BY837955 | AV929532 |
| BP898486 | BP897648 | BE362154 | CF073811 | BY837955 | AV929713 |
| BP898512 | BP887713 | BE362311 | AW679012 | BY837955 | AV929770 |
| BP898512 | DB701663 | BE362330 | CN129985 | BY837955 | AV930411 |
| BP898542 | DB685968 | BE362462 | AW671015 | BY837955 | AV931104 |
| BP898599 | BP896282 | BE362484 | AW679012 | BY837955 | AV931105 |
| BP898599 | DB705442 | BE362539 | AW285562 | BY837955 | AV931447 |
| BP898628 | DB724618 | BE362539 | BE362035 | BY837955 | AV931448 |
| BP898690 | DB685968 | BE362627 | BG947920 | BY837955 | AV931820 |
| BP898760 | BP899641 | BE362771 | AW677809 | BY837955 | AV932090 |

|          |          |          |          |          |          |
|----------|----------|----------|----------|----------|----------|
| BP898812 | DB701663 | BE362771 | AW678106 | BY837955 | AV932341 |
| BP898812 | DB723992 | BE362771 | AW678766 | BY837955 | AV934269 |
| BP898817 | DB711225 | BE362771 | BE126251 | BY837955 | AV934589 |
| BP898957 | BP910111 | BE362771 | BE357402 | BY837955 | AV934936 |
| BP899009 | BP899013 | BE362771 | BM325508 | BY837955 | AV936524 |
| BP899009 | BP900345 | BE362771 | CD429984 | BY837955 | BJ469033 |
| BP899009 | BP900660 | BE362771 | CD431884 | BY837955 | BJ471573 |
| BP899009 | BP902379 | BE362771 | CN128191 | BY837955 | BJ471679 |
| BP899014 | BW692377 | BE363049 | AW286702 | BY837955 | BJ472630 |
| BP899014 | DB694956 | BE363049 | AW678208 | BY837955 | BJ473439 |
| BP899014 | DB696695 | BE363049 | AW678213 | BY837955 | BJ473628 |
| BP899014 | DB696971 | BE363049 | AW680715 | BY837955 | BJ474171 |
| BP899014 | DB697378 | BE363049 | AW745921 | BY837955 | BJ474286 |
| BP899014 | DB718565 | BE363049 | AW747096 | BY837955 | BJ474708 |
| BP899101 | BP899641 | BE363049 | BE362453 | BY838134 | BY840105 |
| BP899127 | BP882942 | BE363049 | BE363216 | BY838188 | BY836441 |
| BP899250 | BP876100 | BE363049 | BE592943 | BY838193 | BY838887 |
| BP899250 | BP876396 | BE363049 | BE593638 | BY838193 | BY842696 |
| BP899250 | BP878722 | BE363049 | BE593709 | BY838247 | BY838255 |
| BP899250 | BP879036 | BE363049 | BE593885 | BY838247 | BY838887 |
| BP899250 | BP880467 | BE363049 | BE594025 | BY838247 | BY840394 |
| BP899250 | BP883557 | BE363049 | BE597072 | BY838247 | BY842696 |
| BP899250 | BP884198 | BE363049 | BE918564 | BY838303 | BY840105 |
| BP899250 | BP884268 | BE363049 | BE918742 | BY838651 | BY837301 |
| BP899250 | BP884271 | BE363049 | BF657657 | BY838651 | BY838037 |
| BP899250 | BP886475 | BE363049 | BF657689 | BY838651 | BY838069 |
| BP899250 | BP896295 | BE363049 | BG047607 | BY838651 | BY841876 |
| BP899250 | BP896300 | BE363049 | BG048404 | BY838670 | BJ549125 |
| BP899250 | BP896305 | BE363049 | BG048815 | BY838746 | AV916032 |
| BP899250 | BP896381 | BE363049 | BG049355 | BY838746 | AV925976 |
| BP899250 | BP896389 | BE363049 | BG159558 | BY838746 | BY836350 |
| BP899250 | BP896696 | BE363049 | BG240332 | BY838746 | BY836824 |
| BP899250 | BP896850 | BE363049 | BG240670 | BY838746 | BY836871 |
| BP899250 | BP897211 | BE363049 | BG241021 | BY838746 | BY836914 |
| BP899250 | BP897252 | BE363049 | BG273684 | BY838746 | BY837456 |
| BP899250 | BP897280 | BE363049 | BG357124 | BY838746 | BY837531 |
| BP899250 | BP897297 | BE363049 | BG357800 | BY838746 | BY837638 |
| BP899250 | BP897315 | BE363049 | BG357813 | BY838746 | BY837730 |
| BP899250 | BP897362 | BE363049 | BG933268 | BY838746 | BY837969 |
| BP899250 | BP897540 | BE363049 | BI211980 | BY838746 | BY838001 |
| BP899250 | BP897976 | BE363049 | CF074020 | BY838746 | BY838025 |
| BP899250 | BP898048 | BE363090 | CD426822 | BY838746 | BY838172 |
| BP899250 | BP898233 | BE363305 | BE592402 | BY838746 | BY838372 |
| BP899250 | BP899259 | BE363314 | BG464685 | BY838746 | BY838833 |
| BP899250 | BP900190 | BE363366 | BE592726 | BY838746 | BY839119 |
| BP899250 | BP900597 | BE363653 | AW677671 | BY838746 | BY839484 |
| BP899250 | BP900678 | BE363653 | AW677702 | BY838746 | BY839510 |
| BP899250 | BP901205 | BE363653 | AW677782 | BY838746 | BY839553 |
| BP899250 | BP901786 | BE363653 | AW677994 | BY838746 | BY839619 |
| BP899250 | BP903933 | BE363653 | AW678146 | BY838746 | BY839831 |
| BP899250 | BP904484 | BE363653 | AW678461 | BY838746 | BY840122 |
| BP899250 | BP905442 | BE363653 | AW679516 | BY838746 | BY840193 |

|          |          |          |          |          |          |
|----------|----------|----------|----------|----------|----------|
| BP899250 | BP905778 | BE363653 | AW679557 | BY838746 | BY840286 |
| BP899250 | BP906360 | BE363653 | AW680397 | BY838746 | BY840369 |
| BP899250 | BP906413 | BE363653 | AW680460 | BY838746 | BY840546 |
| BP899250 | BP907812 | BE363653 | AW745601 | BY838746 | BY840613 |
| BP899250 | BP908501 | BE363653 | AW745732 | BY838746 | BY840868 |
| BP899250 | BP908763 | BE363653 | AW746028 | BY838746 | BY840890 |
| BP899250 | BP908978 | BE363653 | AW746905 | BY838746 | BY840967 |
| BP899250 | BP909343 | BE363653 | AW746949 | BY838746 | BY840969 |
| BP899250 | BP910200 | BE363653 | AW747029 | BY838746 | BY841282 |
| BP899250 | BP910308 | BE363653 | AW747420 | BY838746 | BY841460 |
| BP899250 | BP910869 | BE363653 | AW925126 | BY838746 | BY841544 |
| BP899250 | BP910932 | BE363653 | BE363189 | BY838746 | BY841551 |
| BP899250 | BW688429 | BE363653 | BE363217 | BY838746 | BY841563 |
| BP899250 | BW689553 | BE363653 | BE363241 | BY838746 | BY841687 |
| BP899250 | BW689894 | BE363653 | BE363811 | BY838746 | BY841692 |
| BP899250 | BW690905 | BE363653 | BE363832 | BY838746 | BY841714 |
| BP899250 | BW692663 | BE363653 | EB725747 | BY838746 | BY841843 |
| BP899250 | DB684502 | BE363886 | AW678759 | BY838746 | BY841925 |
| BP899250 | DB685133 | BE363886 | AW678837 | BY838746 | BY842026 |
| BP899250 | DB685867 | BE363886 | BE367671 | BY838746 | BY842147 |
| BP899250 | DB690165 | BE363886 | BM330782 | BY838746 | BY842402 |
| BP899250 | DB693026 | BE363886 | CD426863 | BY838746 | BY842557 |
| BP899250 | DB695824 | BE363907 | AW287462 | BY838746 | BY842629 |
| BP899250 | DB697904 | BE363907 | BG948718 | BY838746 | BY842811 |
| BP899250 | DB706309 | BE363907 | BM317623 | BY838746 | BY843052 |
| BP899250 | DB706579 | BE363907 | BM317642 | BY838746 | BY843788 |
| BP899250 | DB707348 | BE363907 | CD428657 | BY838746 | BY843867 |
| BP899250 | DB707993 | BE363907 | CD429156 | BY838746 | BY843985 |
| BP899250 | DB708771 | BE364064 | CF428346 | BY838746 | BY844169 |
| BP899320 | DB696287 | BE364205 | BM323432 | BY838746 | BY844651 |
| BP899484 | DB679674 | BE364608 | BE362444 | BY838746 | BY844653 |
| BP899590 | BP899641 | BE364968 | BE917879 | BY838746 | BY844949 |
| BP899673 | BP886379 | BE364968 | CD428256 | BY838746 | BY844959 |
| BP899743 | DB698300 | BE364968 | CN129985 | BY838746 | BY844999 |
| BP899760 | BP880355 | BE364969 | BE917879 | BY838746 | BY845156 |
| BP899760 | BP882058 | BE364969 | CN129985 | BY838746 | BY845194 |
| BP899760 | BP883861 | BE365044 | CF428346 | BY838746 | BY845473 |
| BP899760 | BP884573 | BE365051 | BE917879 | BY838746 | BY845853 |
| BP899760 | BP898974 | BE365051 | CD428256 | BY838746 | BY846369 |
| BP899760 | BP901070 | BE365051 | CN129985 | BY838746 | BY846475 |
| BP899760 | BP901490 | BE365350 | CF072007 | BY838746 | BY846751 |
| BP899760 | BP901552 | BE365407 | BE363092 | BY838746 | BY846988 |
| BP899760 | BP906310 | BE365942 | BE599923 | BY838746 | BY847304 |
| BP899760 | BP907315 | BE366331 | BG556364 | BY838746 | BY847444 |
| BP899760 | BW685155 | BE366413 | BM328880 | BY838746 | BY847524 |
| BP899760 | BW688928 | BE366582 | BE357342 | BY838746 | BY847861 |
| BP899760 | BW690875 | BE366760 | BM329299 | BY838746 | BY848042 |
| BP899760 | BW690886 | BE366760 | CD462923 | BY838746 | BY848044 |
| BP899760 | BW692057 | BE366760 | CF433484 | BY838746 | BY848423 |
| BP899760 | BW692842 | BE366883 | BE599250 | BY838746 | BY848449 |
| BP899760 | DB693316 | BE367040 | BG947487 | BY838746 | BY848692 |
| BP899760 | DB704174 | BE367123 | CF428346 | BY838746 | BY848957 |

|          |          |          |          |          |          |
|----------|----------|----------|----------|----------|----------|
| BP899760 | DB712877 | BE367454 | CN129985 | BY838746 | BY849083 |
| BP899760 | DB723530 | BE367557 | AW671369 | BY838746 | BY849321 |
| BP899762 | BP884772 | BE367557 | BE600781 | BY838746 | BY851617 |
| BP899762 | BP900834 | BE367557 | CD429324 | BY838746 | BY851849 |
| BP899762 | BP900871 | BE367557 | CD431254 | BY838746 | BY852190 |
| BP899811 | BP897273 | BE367557 | CD431393 | BY838746 | BY853445 |
| BP899883 | BP899641 | BE367557 | CD431559 | BY838991 | BY835734 |
| BP899930 | BP875858 | BE367557 | CD463301 | BY838991 | BY837384 |
| BP899930 | BP879797 | BE367557 | CF432576 | BY838991 | BY837504 |
| BP899930 | BP879864 | BE592109 | AW563975 | BY838991 | BY841898 |
| BP899930 | BP886733 | BE592261 | CN129985 | BY838991 | BY842498 |
| BP899930 | BP893076 | BE592318 | AW678486 | BY838991 | BY847025 |
| BP899930 | BP895364 | BE592345 | BG947487 | BY838991 | BY848095 |
| BP899943 | DB719445 | BE592464 | BE917879 | BY838991 | BY852568 |
| BP900058 | DB695219 | BE592464 | CD428256 | BY839170 | BJ549125 |
| BP900254 | DB685871 | BE592464 | CN129985 | BY839260 | BY838887 |
| BP900254 | DB691914 | BE592508 | CN129985 | BY839260 | BY842696 |
| BP900254 | DB695587 | BE592652 | BE917879 | BY839355 | BY843083 |
| BP900266 | BP896840 | BE592683 | BG049463 | BY839396 | BY836441 |
| BP900266 | BP897292 | BE592683 | BG049510 | BY839399 | BY846878 |
| BP900266 | BP897458 | BE592756 | AW681045 | BY839480 | BY845131 |
| BP900266 | BP897882 | BE592794 | BE917879 | BY839480 | BY845866 |
| BP900266 | BP897922 | BE592794 | CD428256 | BY839480 | BY846742 |
| BP900266 | BP898441 | BE592794 | CN129985 | BY839480 | BY847060 |
| BP900266 | BP898687 | BE592834 | AW284610 | BY839480 | BY847375 |
| BP900266 | BP898948 | BE592834 | AW677876 | BY839480 | BY847508 |
| BP900266 | BP899025 | BE592834 | AW680535 | BY839480 | BY847638 |
| BP900266 | BP899479 | BE592834 | AW747758 | BY839480 | BY851124 |
| BP900266 | BP899828 | BE592834 | BE357966 | BY839488 | BY836441 |
| BP900266 | BP900187 | BE592834 | BG048021 | BY839496 | BY836441 |
| BP900266 | BP900194 | BE592834 | BG158159 | BY839506 | BY836441 |
| BP900266 | BP900475 | BE592834 | BG355979 | BY839585 | BY836441 |
| BP900266 | BP900583 | BE592834 | CF072722 | BY839690 | BY853892 |
| BP900266 | BP901620 | BE592834 | CF428737 | BY839777 | AV836477 |
| BP900266 | BP901684 | BE592834 | EB725791 | BY839804 | BY836441 |
| BP900266 | BP901959 | BE592854 | BE357451 | BY839815 | AV919492 |
| BP900266 | BP902169 | BE592854 | BE360420 | BY839822 | BY836765 |
| BP900266 | BP902335 | BE592854 | BE361175 | BY839822 | BY838841 |
| BP900266 | BP906539 | BE592854 | BE599187 | BY839822 | BY839502 |
| BP900266 | BP906771 | BE592854 | BE600800 | BY839822 | BY839552 |
| BP900266 | BP907781 | BE592854 | CD428568 | BY839822 | BY843083 |
| BP900266 | BP909835 | BE592854 | CN124783 | BY839822 | BY852735 |
| BP900266 | BP911163 | BE592854 | CX606213 | BY839941 | BY836441 |
| BP900266 | DB693746 | BE592854 | CX610111 | BY840086 | AV836477 |
| BP900272 | BP897547 | BE592858 | AW680444 | BY840224 | BY849347 |
| BP900272 | BP901301 | BE592862 | BE917879 | BY840224 | BY852736 |
| BP900272 | BW689937 | BE592862 | CD428256 | BY840257 | BY836441 |
| BP900272 | DB682830 | BE592862 | CN129985 | BY840385 | BY836498 |
| BP900272 | DB684160 | BE592905 | CN129985 | BY840385 | BY838840 |
| BP900272 | DB685105 | BE592911 | AW677843 | BY840385 | BY849757 |
| BP900272 | DB706329 | BE592911 | AW677949 | BY840385 | BY851285 |
| BP900371 | DB691459 | BE592911 | AW677999 | BY840385 | BY857986 |



|          |          |          |          |          |          |
|----------|----------|----------|----------|----------|----------|
| BP900440 | DB679873 | BE592911 | AW678589 | BY840385 | BY858982 |
| BP900474 | BP897648 | BE592911 | AW678600 | BY840385 | BY862186 |
| BP900490 | BW690372 | BE592911 | AW679649 | BY840385 | BY863817 |
| BP900490 | BW691378 | BE592911 | AW679930 | BY840385 | BY863847 |
| BP900505 | DB679674 | BE592911 | AW680181 | BY840385 | BY864403 |
| BP900622 | BP897920 | BE592911 | AW680412 | BY840385 | BY870052 |
| BP900677 | BP886099 | BE592911 | AW745670 | BY840385 | BY871015 |
| BP900856 | DB683540 | BE592911 | AW746547 | BY840385 | BY872380 |
| BP900933 | DB706497 | BE592911 | AW746885 | BY840385 | BY872803 |
| BP900954 | BP897648 | BE592911 | AW747087 | BY840385 | BY873198 |
| BP900955 | BP882498 | BE592911 | AW747139 | BY840501 | BY836441 |
| BP900955 | BP896970 | BE592911 | AW747219 | BY840589 | BY836441 |
| BP900955 | DB704688 | BE592911 | AW747368 | BY840768 | BJ463401 |
| BP900955 | DB708481 | BE592911 | AW747662 | BY840768 | BY838607 |
| BP900955 | DB716198 | BE592911 | AW747712 | BY840920 | BY840560 |
| BP901063 | BP902308 | BE592911 | AW747777 | BY840943 | BY846414 |
| BP901090 | DB709038 | BE592911 | AW924137 | BY841027 | BY836441 |
| BP901256 | BW690372 | BE592911 | AW924360 | BY841117 | BY836441 |
| BP901256 | BW691378 | BE592911 | AW924686 | BY841187 | BY840090 |
| BP901329 | BP907547 | BE592911 | AW925094 | BY841187 | BY841900 |
| BP901356 | DB701354 | BE592911 | BE363738 | BY841187 | BY850036 |
| BP901380 | DB700820 | BE592911 | BE363793 | BY841274 | AV915542 |
| BP901387 | DB692671 | BE592911 | BE593216 | BY841455 | BY836441 |
| BP901475 | DB680094 | BE592911 | BE593337 | BY841457 | AV924094 |
| BP901592 | DB697780 | BE592911 | BE593449 | BY841457 | AV924543 |
| BP901746 | BP897648 | BE592911 | BG048956 | BY841457 | AV924984 |
| BP901871 | BP897648 | BE592911 | BG049419 | BY841457 | AV926935 |
| BP901936 | BP896587 | BE592911 | BG240991 | BY841457 | BJ468855 |
| BP901936 | BP905524 | BE592911 | BI075137 | BY841457 | BJ473066 |
| BP901936 | DB684132 | BE592970 | CF433729 | BY841457 | BY835758 |
| BP901936 | DB684537 | BE593085 | AW677671 | BY841457 | BY836985 |
| BP901936 | DB705230 | BE593085 | AW677702 | BY841457 | BY837003 |
| BP901939 | DB696151 | BE593085 | AW677782 | BY841457 | BY837171 |
| BP901998 | BP877566 | BE593085 | AW677994 | BY841457 | BY837579 |
| BP902034 | BP897920 | BE593085 | AW678066 | BY841457 | BY838383 |
| BP902181 | BP897920 | BE593085 | AW678146 | BY841457 | BY838646 |
| BP902224 | DB702511 | BE593085 | AW678147 | BY841457 | BY838782 |
| BP902321 | BP900248 | BE593085 | AW678461 | BY841457 | BY838932 |
| BP902495 | DB680885 | BE593085 | AW678495 | BY841457 | BY839012 |
| BP902547 | BW685936 | BE593085 | AW678655 | BY841457 | BY839124 |
| BP902567 | BP897648 | BE593085 | AW679516 | BY841457 | BY839887 |
| BP902584 | BP903032 | BE593085 | AW679557 | BY841457 | BY842998 |
| BP902611 | DB679674 | BE593085 | AW680397 | BY841457 | BY843400 |
| BP902622 | DB683429 | BE593085 | AW680460 | BY841457 | BY843540 |
| BP902622 | DB693027 | BE593085 | AW745601 | BY841457 | BY844311 |
| BP902622 | DB693246 | BE593085 | AW745732 | BY841619 | BY836441 |
| BP902622 | DB701738 | BE593085 | AW746028 | BY841659 | AV836477 |
| BP902622 | DB704539 | BE593085 | AW746440 | BY841691 | BJ472507 |
| BP902622 | DB710476 | BE593085 | AW746905 | BY841716 | BY836441 |
| BP902627 | DB714454 | BE593085 | AW746949 | BY841825 | BY837507 |
| BP902658 | DB679674 | BE593085 | AW747029 | BY841825 | BY840394 |
| BP902927 | DB721513 | BE593085 | AW747089 | BY841825 | BY841724 |

|          |          |          |          |          |          |
|----------|----------|----------|----------|----------|----------|
| BP903085 | BP902766 | BE593085 | AW747420 | BY841825 | BY842696 |
| BP903085 | BP903333 | BE593085 | AW747499 | BY841875 | BY837196 |
| BP903085 | BP904956 | BE593085 | AW924413 | BY841875 | BY837430 |
| BP903085 | BP905418 | BE593085 | AW924740 | BY841934 | AV926368 |
| BP903085 | BP908481 | BE593085 | AW925126 | BY841934 | BJ468912 |
| BP903085 | BP909226 | BE593085 | BE360009 | BY841971 | BY836159 |
| BP903085 | BP909712 | BE593085 | BE363189 | BY841971 | BY838255 |
| BP903085 | BP911149 | BE593085 | BE363214 | BY841971 | BY839978 |
| BP903085 | BP911230 | BE593085 | BE363217 | BY841971 | BY840394 |
| BP903085 | DB712644 | BE593085 | BE363241 | BY841971 | BY841724 |
| BP903203 | BP897728 | BE593085 | BE363256 | BY841971 | BY842696 |
| BP903288 | DB679674 | BE593085 | BE363282 | BY841971 | BY852152 |
| BP903322 | BP888413 | BE593085 | BE363526 | BY841975 | BY836441 |
| BP903322 | BP896680 | BE593085 | BE363811 | BY842000 | BY836441 |
| BP903322 | BP897238 | BE593085 | BE363832 | BY842020 | BY836441 |
| BP903322 | BP897899 | BE593085 | BE592743 | BY842054 | AV933765 |
| BP903322 | BP898152 | BE593085 | BE592803 | BY842054 | AV934445 |
| BP903322 | BP898333 | BE593085 | BE593994 | BY842065 | BY836441 |
| BP903322 | BP898687 | BE593085 | BE594111 | BY842263 | BJ549125 |
| BP903322 | BP898891 | BE593085 | BG463060 | BY842365 | BY835787 |
| BP903322 | BP898948 | BE593085 | BG933119 | BY842365 | BY836056 |
| BP903322 | BP898999 | BE593085 | EB725747 | BY842365 | BY836141 |
| BP903322 | BP899301 | BE593094 | BI141345 | BY842365 | BY836919 |
| BP903322 | BP899889 | BE593094 | BM327449 | BY842365 | BY837260 |
| BP903322 | BP899897 | BE593094 | BM328591 | BY842365 | BY837568 |
| BP903322 | BP900521 | BE593094 | CF072045 | BY842365 | BY837751 |
| BP903322 | BP900586 | BE593219 | BM323018 | BY842365 | BY837920 |
| BP903322 | BP900702 | BE593405 | BI141345 | BY842365 | BY838148 |
| BP903322 | BP900770 | BE593405 | BM327449 | BY842365 | BY838596 |
| BP903322 | BP901001 | BE593405 | BM328591 | BY842365 | BY838628 |
| BP903322 | BP907809 | BE593405 | CF072045 | BY842365 | BY839179 |
| BP903322 | DB693746 | BE593456 | BE917879 | BY842365 | BY839282 |
| BP903417 | BP895811 | BE593456 | CD428256 | BY842365 | BY839401 |
| BP903554 | BP899641 | BE593456 | CN129985 | BY842365 | BY839550 |
| BP903577 | DB679674 | BE593540 | CD426822 | BY842365 | BY839835 |
| BP903628 | BP897648 | BE593613 | AW745319 | BY842365 | BY839932 |
| BP903636 | BP900789 | BE593734 | CF488003 | BY842365 | BY840085 |
| BP903642 | BP897648 | BE593754 | BI074923 | BY842365 | BY840331 |
| BP903973 | BW686666 | BE593776 | AW923817 | BY842365 | BY840752 |
| BP904000 | DB679674 | BE593805 | CX611848 | BY842365 | BY841063 |
| BP904025 | BP900789 | BE593941 | BI076326 | BY842365 | BY841445 |
| BP904272 | BP892940 | BE593953 | BG739296 | BY842365 | BY841532 |
| BP904489 | BP896547 | BE593962 | BM323243 | BY842365 | BY841569 |
| BP904500 | DB699072 | BE594042 | CN129985 | BY842365 | BY841712 |
| BP904521 | BP896547 | BE594049 | BG322904 | BY842365 | BY841940 |
| BP904533 | BP897192 | BE594066 | BI074923 | BY842365 | BY842180 |
| BP904533 | BP902476 | BE594066 | CD424714 | BY842365 | BY842575 |
| BP904612 | DB702539 | BE594108 | BE917879 | BY842365 | BY842713 |
| BP904651 | DB702539 | BE594170 | BE917879 | BY842365 | BY843446 |
| BP904659 | BP897648 | BE594170 | CD428256 | BY842365 | BY843549 |
| BP904666 | BP903032 | BE594170 | CN129985 | BY842365 | BY843823 |
| BP904680 | BP884850 | BE594267 | AW677747 | BY842365 | BY844031 |

|          |          |          |          |          |          |
|----------|----------|----------|----------|----------|----------|
| BP904697 | BP885782 | BE594267 | AW679790 | BY842365 | BY844139 |
| BP904697 | BP898897 | BE594267 | AW680671 | BY842365 | BY853173 |
| BP904697 | DB679699 | BE594267 | AW680732 | BY842401 | AV933765 |
| BP904697 | DB682818 | BE594267 | AW746378 | BY842401 | AV934445 |
| BP904697 | DB712444 | BE594267 | AW746553 | BY842428 | BY836441 |
| BP904886 | BP889817 | BE594267 | BE363401 | BY842565 | BY836441 |
| BP904886 | BP903071 | BE594267 | BE363505 | BY842717 | BY836441 |
| BP904908 | BP885782 | BE594267 | BE638175 | BY842798 | BY836441 |
| BP904908 | BP898897 | BE594267 | CD423326 | BY842849 | BY846520 |
| BP904908 | DB682775 | BE594275 | BE917879 | BY843004 | BY836441 |
| BP904908 | DB682818 | BE594275 | CD428256 | BY843012 | BY837092 |
| BP904908 | DB712444 | BE594275 | CN129985 | BY843012 | BY852079 |
| BP904922 | DB681596 | BE594293 | CF072007 | BY843171 | BY836441 |
| BP905009 | BP897273 | BE594298 | CN129317 | BY843212 | BY836441 |
| BP905086 | DB681596 | BE594322 | AW679169 | BY843299 | BY836441 |
| BP905102 | BP900873 | BE594405 | AW671972 | BY843389 | BY838025 |
| BP905102 | BP902761 | BE594405 | BE595438 | BY843389 | BY841597 |
| BP905102 | BP905136 | BE594405 | BE599086 | BY843389 | BY841687 |
| BP905102 | BP905373 | BE594405 | BM318666 | BY843389 | BY841925 |
| BP905102 | DB697230 | BE594405 | BM322427 | BY843389 | BY842811 |
| BP905145 | BP899641 | BE594405 | CF433548 | BY843389 | BY843038 |
| BP905227 | DB679674 | BE594405 | CN130884 | BY843389 | BY843112 |
| BP905259 | BP887668 | BE594415 | BE360818 | BY843548 | BY836441 |
| BP905286 | BP887668 | BE594415 | BE361778 | BY843681 | BJ462844 |
| BP905294 | DB699072 | BE594478 | BE600810 | BY843819 | BY836441 |
| BP905369 | BP903032 | BE594718 | BE360362 | BY843844 | BY840509 |
| BP905447 | BP897273 | BE594759 | BE364755 | BY843844 | BY849773 |
| BP905503 | BP896989 | BE594759 | BE597876 | BY844084 | BY836441 |
| BP905503 | BP898647 | BE594821 | BE366624 | BY844114 | AV923305 |
| BP905503 | BP900205 | BE594975 | BE597905 | BY844122 | AV836477 |
| BP905503 | BP902143 | BE595178 | CF430477 | BY844162 | BY841922 |
| BP905503 | BP902605 | BE595214 | BM318217 | BY844162 | BY843311 |
| BP905503 | BP909620 | BE595226 | AW563975 | BY844162 | BY843478 |
| BP905503 | BP911180 | BE595283 | CF426917 | BY844162 | BY852858 |
| BP905540 | DB679674 | BE595315 | BM323617 | BY844267 | BY835980 |
| BP905638 | DB680885 | BE595352 | CX606760 | BY844267 | BY837216 |
| BP905834 | BP877100 | BE595381 | CN129342 | BY844267 | BY840951 |
| BP905834 | BP883685 | BE595413 | BE600055 | BY844267 | BY842562 |
| BP905834 | BW685368 | BE595456 | BE600810 | BY844267 | BY842763 |
| BP905834 | BW685877 | BE595457 | AW287664 | BY844533 | BY836441 |
| BP905834 | BW691972 | BE595720 | BM322372 | BY844542 | BY846520 |
| BP905834 | BW692555 | BE595925 | BM330238 | BY844579 | BY836441 |
| BP905834 | DB680136 | BE595925 | CF071637 | BY844582 | BJ549125 |
| BP905834 | DB681396 | BE595925 | CN125604 | BY844627 | BY836441 |
| BP905834 | DB685006 | BE595925 | CX610040 | BY844628 | AV914730 |
| BP905834 | DB685052 | BE596001 | BE599250 | BY844628 | AV915582 |
| BP905834 | DB696182 | BE596002 | BE594965 | BY844628 | BJ549223 |
| BP905834 | DB697538 | BE596109 | CX607854 | BY844628 | BY835754 |
| BP905834 | DB698060 | BE596180 | BM318412 | BY844628 | BY836984 |
| BP905834 | DB698875 | BE596180 | CF429268 | BY844628 | BY839050 |
| BP905834 | DB702809 | BE596245 | BE917879 | BY844628 | BY839170 |
| BP905834 | DB703824 | BE596305 | BM331299 | BY844628 | BY839923 |

|          |          |          |          |          |          |
|----------|----------|----------|----------|----------|----------|
| BP905834 | DB707446 | BE596378 | BE917879 | BY844628 | BY844196 |
| BP905834 | DB714572 | BE596378 | CD428256 | BY844628 | BY844582 |
| BP905856 | BP896547 | BE596378 | CN129985 | BY844628 | BY844614 |
| BP905894 | DB711644 | BE596397 | BG947442 | BY844628 | BY844692 |
| BP905897 | BP901901 | BE596413 | BI075230 | BY844628 | BY844835 |
| BP905934 | BP893478 | BE596587 | BM327719 | BY844628 | BY846415 |
| BP905950 | BP897920 | BE596607 | BE362444 | BY844628 | BY847462 |
| BP905969 | BP896989 | BE596628 | BM327958 | BY844628 | BY848749 |
| BP905969 | BP898164 | BE597044 | BE917879 | BY844628 | BY848819 |
| BP905969 | BP898647 | BE597044 | CD428256 | BY844634 | BY836441 |
| BP905969 | BP899757 | BE597044 | CN129985 | BY844721 | BY851153 |
| BP905969 | BP900584 | BE597096 | CD432557 | BY844721 | BY851272 |
| BP905969 | BP902143 | BE597247 | BE599923 | BY844778 | BJ549125 |
| BP905969 | BP906159 | BE597300 | BE599923 | BY844932 | BJ549125 |
| BP906028 | BP898720 | BE597349 | BE595870 | BY844935 | BY836441 |
| BP906028 | BP899757 | BE597513 | BE367272 | BY844941 | AV925274 |
| BP906028 | BP900584 | BE597584 | BE917879 | BY844941 | AV930429 |
| BP906028 | BP902143 | BE597665 | AW677200 | BY845035 | BY846520 |
| BP906038 | DB707827 | BE597665 | BE125199 | BY845131 | BY836441 |
| BP906038 | DB711644 | BE597665 | BG273528 | BY845295 | BY836441 |
| BP906038 | DB727390 | BE597728 | BM328579 | BY845355 | BY836441 |
| BP906085 | BP875807 | BE597753 | BG411003 | BY845378 | BY840205 |
| BP906085 | BP876304 | BE597753 | BG412432 | BY845418 | BJ549125 |
| BP906085 | BP876963 | BE597753 | BM330058 | BY845423 | BJ549125 |
| BP906085 | BP879469 | BE597800 | BE366378 | BY845496 | BY846520 |
| BP906085 | BP881558 | BE597890 | BG049753 | BY845566 | BY836441 |
| BP906085 | BP884299 | BE597939 | BM328579 | BY845604 | BJ549125 |
| BP906085 | BP884897 | BE598135 | AW563975 | BY845670 | BY836441 |
| BP906085 | BP886192 | BE598198 | AW563975 | BY845745 | AV924107 |
| BP906085 | BP886520 | BE598272 | CD462981 | BY845824 | BY847935 |
| BP906085 | BP887220 | BE598284 | AW287664 | BY845824 | BY848669 |
| BP906085 | BP887292 | BE598308 | BI140653 | BY845856 | BJ549125 |
| BP906085 | BP889471 | BE598367 | BM328579 | BY845866 | BY836441 |
| BP906085 | BP899065 | BE598436 | CN129985 | BY845907 | AV925341 |
| BP906085 | BP899800 | BE598497 | BE363092 | BY845907 | AV925604 |
| BP906085 | BP904335 | BE598520 | BE360912 | BY845907 | AV925735 |
| BP906085 | BW686983 | BE598630 | BE595528 | BY845907 | BJ547120 |
| BP906085 | DB688083 | BE598654 | CD429181 | BY845907 | BJ550242 |
| BP906085 | DB694648 | BE598719 | AW287664 | BY845907 | BY842853 |
| BP906085 | DB694710 | BE598719 | BE364020 | BY846211 | BY836441 |
| BP906085 | DB699113 | BE598770 | BE917879 | BY846222 | BJ464727 |
| BP906085 | DB707282 | BE598770 | CN129985 | BY846226 | BY836441 |
| BP906105 | BP910111 | BE598934 | BM322306 | BY846274 | BJ549125 |
| BP906217 | BP902160 | BE599002 | BE360912 | BY846370 | BY842732 |
| BP906321 | BP902216 | BE599048 | BM318308 | BY846370 | BY843898 |
| BP906321 | DB691714 | BE599065 | BE594536 | BY846370 | BY844714 |
| BP906352 | BP899641 | BE599065 | BG411225 | BY846370 | BY846408 |
| BP906454 | DB707827 | BE599065 | CD431931 | BY846370 | BY850053 |
| BP906454 | DB711644 | BE599065 | CD463943 | BY846370 | BY850856 |
| BP906454 | DB727390 | BE599065 | CN125514 | BY846370 | BY852086 |
| BP906488 | DB718462 | BE599147 | BE125221 | BY846370 | BY853050 |
| BP906497 | BP908259 | BE599311 | CX607854 | BY846437 | BY836441 |

|          |          |          |          |          |          |
|----------|----------|----------|----------|----------|----------|
| BP906611 | DB680962 | BE599532 | BE917630 | BY846464 | AV912736 |
| BP906611 | DB681824 | BE599950 | AW563975 | BY846464 | AV913522 |
| BP906670 | DB725410 | BE600010 | BE364020 | BY846464 | AV915839 |
| BP906704 | BP897520 | BE600052 | AW563975 | BY846464 | AV916828 |
| BP906704 | BP898954 | BE600143 | CF428346 | BY846464 | AV917201 |
| BP906704 | BP900413 | BE600236 | BM331299 | BY846464 | AV917323 |
| BP906704 | BP902423 | BE600270 | BE597883 | BY846464 | AV923768 |
| BP906704 | BP902643 | BE600270 | CD463214 | BY846464 | AV932062 |
| BP906704 | BP902696 | BE600270 | CN130860 | BY846464 | BJ547776 |
| BP906704 | BP902798 | BE600357 | CD463214 | BY846464 | BJ549166 |
| BP906704 | BP902841 | BE600357 | CN125000 | BY846464 | BJ549511 |
| BP906704 | BP902884 | BE600359 | BM318308 | BY846464 | BY835742 |
| BP906704 | BP903110 | BE600368 | CN125000 | BY846464 | BY837462 |
| BP906704 | BP903191 | BE600368 | CN125763 | BY846464 | BY838014 |
| BP906704 | BP903226 | BE600387 | BM331299 | BY846464 | BY840079 |
| BP906704 | BP903345 | BE600399 | AW678537 | BY846464 | BY840859 |
| BP906704 | BP903352 | BE600468 | BE599250 | BY846464 | BY842857 |
| BP906704 | BP903402 | BE600506 | BE364020 | BY846464 | BY844376 |
| BP906704 | BP903404 | BE600656 | BG462792 | BY846464 | BY846318 |
| BP906704 | BP903536 | BE600689 | AW563975 | BY846464 | BY846834 |
| BP906704 | BP903593 | BE600795 | BE599923 | BY846464 | BY847095 |
| BP906704 | BP903677 | BE600880 | AW671972 | BY846464 | BY847128 |
| BP906704 | BP903715 | BE600880 | BE595438 | BY846464 | BY848325 |
| BP906704 | BP903904 | BE600880 | BE599086 | BY846539 | BJ549125 |
| BP906704 | BP903940 | BE600880 | BM322427 | BY846540 | AV926368 |
| BP906704 | BP903981 | BE600880 | CF433029 | BY846598 | BY844938 |
| BP906704 | BP904015 | BE600880 | CF433548 | BY846695 | BY847279 |
| BP906704 | BP904254 | BE600965 | CF433339 | BY846706 | BY838916 |
| BP906704 | BP904362 | BE600965 | CF433849 | BY846742 | BY836441 |
| BP906704 | BP904410 | BE600965 | CN128323 | BY846782 | BY846520 |
| BP906704 | BP904438 | BE601003 | CF430477 | BY846888 | BY847640 |
| BP906704 | BP904944 | BE601124 | BG355825 | BY846888 | BY853268 |
| BP906704 | BP905003 | BE601127 | CD432557 | BY846980 | BY846520 |
| BP906704 | BP905056 | BE917676 | CF487607 | BY847017 | BJ549125 |
| BP906704 | BP905400 | BE917714 | AW679012 | BY847172 | AV926358 |
| BP906704 | BP905455 | BE917755 | CF486784 | BY847172 | BY836725 |
| BP906704 | BP905464 | BE917914 | BG933631 | BY847172 | BY836824 |
| BP906704 | BP905610 | BE918209 | BM323415 | BY847172 | BY837061 |
| BP906704 | BP905701 | BE918318 | CD426822 | BY847172 | BY837160 |
| BP906704 | BP905838 | BE918391 | CD426822 | BY847172 | BY837192 |
| BP906704 | BP906014 | BE918581 | AW679012 | BY847172 | BY837614 |
| BP906704 | BP906908 | BF176708 | BM328579 | BY847172 | BY837638 |
| BP906704 | BP907691 | BF176787 | BM331299 | BY847172 | BY837986 |
| BP906704 | BP907896 | BF506935 | BF506940 | BY847172 | BY838001 |
| BP906704 | BP908199 | BF507199 | CF489909 | BY847172 | BY838172 |
| BP906704 | BP908339 | BF656930 | CD461597 | BY847172 | BY838305 |
| BP906704 | BP908344 | BF657006 | BE360362 | BY847172 | BY839119 |
| BP906704 | BP908882 | BF657595 | CX607854 | BY847172 | BY839127 |
| BP906704 | BP909333 | BF657665 | BE358341 | BY847172 | BY839183 |
| BP906704 | BP909521 | BF657665 | BI075807 | BY847172 | BY839831 |
| BP906704 | BP910487 | BF657665 | BI075997 | BY847172 | BY840065 |
| BP906704 | BP911103 | BF657665 | BI098932 | BY847172 | BY840787 |

|          |          |          |          |          |          |
|----------|----------|----------|----------|----------|----------|
| BP906704 | DB679504 | BF657665 | CF429076 | BY847172 | BY841347 |
| BP906704 | DB683074 | BF657665 | CN130454 | BY847172 | BY841563 |
| BP906704 | DB683295 | BG047591 | BM317516 | BY847172 | BY842278 |
| BP906704 | DB683446 | BG047745 | AW679012 | BY847172 | BY842602 |
| BP906704 | DB684226 | BG048078 | BE125980 | BY847172 | BY842629 |
| BP906704 | DB685343 | BG048389 | AW287615 | BY847172 | BY843795 |
| BP906704 | DB685789 | BG048389 | CD462486 | BY847172 | BY843825 |
| BP906704 | DB686158 | BG048389 | CN126560 | BY847172 | BY843867 |
| BP906704 | DB687890 | BG048482 | CX607854 | BY847172 | BY843895 |
| BP906704 | DB690301 | BG048554 | CX607854 | BY847172 | BY843985 |
| BP906704 | DB690879 | BG048650 | BG356685 | BY847172 | BY844088 |
| BP906704 | DB691699 | BG048715 | CD428312 | BY847172 | BY844337 |
| BP906704 | DB691919 | BG048786 | BE917879 | BY847172 | BY844400 |
| BP906704 | DB692713 | BG048818 | BE125739 | BY847172 | BY844683 |
| BP906704 | DB693036 | BG048818 | BG357888 | BY847172 | BY844947 |
| BP906704 | DB694488 | BG048818 | CF427446 | BY847172 | BY845231 |
| BP906704 | DB695011 | BG048818 | CF430529 | BY847172 | BY845329 |
| BP906704 | DB699660 | BG048818 | CF430687 | BY847172 | BY846259 |
| BP906704 | DB703477 | BG048818 | CF431904 | BY847172 | BY846369 |
| BP906704 | DB707065 | BG048818 | CF434211 | BY847172 | BY846608 |
| BP906714 | DB713188 | BG048818 | CN127349 | BY847172 | BY847304 |
| BP906746 | BP894957 | BG048818 | CN128992 | BY847172 | BY848432 |
| BP906746 | BP904950 | BG048818 | CN129459 | BY847172 | BY852190 |
| BP906746 | BP905522 | BG048818 | CN130437 | BY847243 | BY848669 |
| BP906746 | DB721802 | BG048818 | CX609258 | BY847256 | BY846520 |
| BP906746 | DB724346 | BG048818 | CX610743 | BY847264 | BJ549125 |
| BP906811 | BP897273 | BG048818 | CX611300 | BY847406 | AV836521 |
| BP906838 | BP881705 | BG048818 | CX612090 | BY847590 | BY846131 |
| BP906838 | BP884516 | BG048928 | CF480574 | BY847590 | BY846593 |
| BP906838 | BW685492 | BG049011 | CD428312 | BY847638 | BY836441 |
| BP906838 | BW687058 | BG049373 | CF428015 | BY847666 | BY846520 |
| BP906838 | BW687615 | BG049485 | CF429905 | BY847730 | BJ549125 |
| BP906838 | BW688345 | BG049634 | BG462986 | BY847961 | BY836441 |
| BP906838 | BW690509 | BG049735 | AW677711 | BY848166 | BJ549125 |
| BP906838 | DB694654 | BG054306 | CD432557 | BY848255 | BJ549125 |
| BP906838 | DB701780 | BG054375 | BE918096 | BY848505 | BY836441 |
| BP906838 | DB723732 | BG101741 | BG463923 | BY848591 | AV926368 |
| BP906917 | BW691682 | BG157922 | BM329826 | BY848623 | BY836441 |
| BP906938 | DB679674 | BG157924 | CN130152 | BY848700 | BY836441 |
| BP906952 | DB680632 | BG158287 | CX607281 | BY848746 | AV926368 |
| BP906952 | DB710811 | BG239802 | BG463927 | BY848746 | BJ468912 |
| BP906952 | DB724719 | BG239875 | CF480574 | BY848805 | BY836441 |
| BP906973 | BP875881 | BG240021 | BE595044 | BY848831 | BY847279 |
| BP906973 | BP898350 | BG240237 | AW563975 | BY849153 | BY836441 |
| BP906973 | DB678836 | BG240241 | CF071760 | BY849169 | BY852906 |
| BP907209 | DB709038 | BG240309 | BG948462 | BY849362 | BY836441 |
| BP907209 | DB721779 | BG240355 | AW744914 | BY849468 | BY847530 |
| BP907213 | DB706497 | BG240410 | CN131074 | BY849468 | BY851637 |
| BP907262 | BP876692 | BG240602 | AW679012 | BY849500 | BY847441 |
| BP907262 | BP885505 | BG240783 | BG411940 | BY849532 | BY848235 |
| BP907262 | DB692259 | BG240876 | BG048028 | BY849560 | BY850206 |
| BP907262 | DB713822 | BG240876 | CD431843 | BY850109 | BY836441 |

|          |          |          |          |          |          |
|----------|----------|----------|----------|----------|----------|
| BP907300 | DB718448 | BG241057 | BG412739 | BY850249 | BY853014 |
| BP907449 | DB686588 | BG241106 | CX609246 | BY850281 | AV836521 |
| BP907502 | DB698208 | BG241130 | AW671895 | BY850573 | BY836441 |
| BP907523 | BP886285 | BG241130 | BM323804 | BY850659 | BY836441 |
| BP907566 | DB724407 | BG241130 | BM324597 | BY850709 | BJ549125 |
| BP907647 | BP902216 | BG241130 | CD431866 | BY850887 | BY836441 |
| BP907647 | DB695994 | BG241130 | CF434026 | BY850928 | BY836441 |
| BP907736 | BP900789 | BG241130 | CF489244 | BY850993 | BY836441 |
| BP907755 | BP899641 | BG241168 | CF071760 | BY851028 | BY836441 |
| BP907843 | BP899641 | BG273176 | CF074296 | BY851142 | BY871745 |
| BP907845 | BP909127 | BG273207 | BF317702 | BY851172 | BY836441 |
| BP907845 | BP910997 | BG273405 | CX609246 | BY851434 | BJ549125 |
| BP907845 | DB680305 | BG322711 | CF480789 | BY851464 | BY871745 |
| BP907845 | DB703312 | BG322711 | CF487754 | BY851520 | BY836441 |
| BP907859 | DB694269 | BG322711 | CX606915 | BY851566 | BY848428 |
| BP907859 | DB703668 | BG322729 | BI075182 | BY851850 | BY836441 |
| BP907948 | DB711609 | BG322976 | BG463179 | BY851888 | AV923890 |
| BP907991 | BP884093 | BG322976 | BG556341 | BY851960 | BY837997 |
| BP908054 | BP897043 | BG322976 | BG557689 | BY851960 | BY850036 |
| BP908054 | BP897050 | BG323092 | BG323101 | BY851960 | BY851299 |
| BP908054 | BP897256 | BG323173 | BM328500 | BY852078 | BY844479 |
| BP908054 | BP897377 | BG323183 | BM331299 | BY852078 | BY849264 |
| BP908054 | BP897549 | BG355530 | BE355840 | BY852078 | BY852532 |
| BP908054 | BP902489 | BG355729 | BI643769 | BY852142 | BY843675 |
| BP908054 | BP902533 | BG355781 | BM324812 | BY852142 | BY850442 |
| BP908054 | BP902599 | BG355796 | AW678537 | BY852174 | BY836441 |
| BP908054 | BP902643 | BG355822 | CD424758 | BY852335 | BY836441 |
| BP908054 | BP902664 | BG355904 | CN130221 | BY852522 | BY836441 |
| BP908054 | BP902699 | BG355918 | BG410730 | BY852610 | BY850409 |
| BP908054 | BP902718 | BG356361 | AW747150 | BY852894 | BY836441 |
| BP908054 | BP902738 | BG356517 | BM331299 | BY852909 | BY836441 |
| BP908054 | BP902857 | BG356519 | BM326828 | BY853153 | BY849594 |
| BP908054 | BP902990 | BG356607 | BE364232 | BY853308 | BY836441 |
| BP908054 | BP903025 | BG356804 | CF431803 | BY853400 | BY846520 |
| BP908054 | BP903114 | BG356897 | BG355790 | BY853454 | BY836441 |
| BP908054 | BP903226 | BG357026 | AW679012 | BY853472 | BY836441 |
| BP908054 | BP903352 | BG357194 | BE599465 | BY853510 | BY849339 |
| BP908054 | BP903382 | BG357359 | AW286920 | BY853600 | BY836441 |
| BP908054 | BP903402 | BG357359 | AW564790 | BY853766 | BY846520 |
| BP908054 | BP903480 | BG357359 | BF420879 | BY853966 | BY871745 |
| BP908054 | BP903536 | BG357413 | CD464107 | BY854054 | BY836441 |
| BP908054 | BP903620 | BG357420 | BE366878 | BY854091 | BY854599 |
| BP908054 | BP903621 | BG357612 | AW679012 | BY854091 | BY855643 |
| BP908054 | BP903904 | BG357793 | BE594472 | BY854097 | BY854078 |
| BP908054 | BP903940 | BG357793 | CD428263 | BY854097 | BY854221 |
| BP908054 | BP903955 | BG357793 | CN124909 | BY854097 | BY854288 |
| BP908054 | BP904049 | BG357793 | CN126182 | BY854097 | BY855625 |
| BP908054 | BP904198 | BG357793 | CN131353 | BY854097 | BY856392 |
| BP908054 | BP904203 | BG357929 | AW745407 | BY854097 | BY856493 |
| BP908054 | BP904299 | BG357929 | BE357386 | BY854097 | BY856873 |
| BP908054 | BP904438 | BG357929 | BM317541 | BY854097 | BY858011 |
| BP908054 | BP904508 | BG357929 | CD425505 | BY854123 | BY854450 |

|          |          |          |          |          |          |
|----------|----------|----------|----------|----------|----------|
| BP908054 | BP904529 | BG357929 | CF432736 | BY854123 | BY855625 |
| BP908054 | BP904536 | BG410706 | CF480574 | BY854123 | BY856392 |
| BP908054 | BP904760 | BG410714 | BG322928 | BY854123 | BY856493 |
| BP908054 | BP904856 | BG410876 | BM328579 | BY854123 | BY857301 |
| BP908054 | BP905027 | BG410953 | CN128524 | BY854123 | BY857724 |
| BP908054 | BP905160 | BG411059 | BE358341 | BY854123 | BY857807 |
| BP908054 | BP905275 | BG411059 | BG948468 | BY854132 | BY855554 |
| BP908054 | BP905311 | BG411059 | BI075807 | BY854132 | BY856451 |
| BP908054 | BP905349 | BG411059 | BI075997 | BY854132 | BY856585 |
| BP908054 | BP905452 | BG411059 | BI246040 | BY854132 | BY856917 |
| BP908054 | BP905464 | BG411059 | CF429076 | BY854132 | BY857114 |
| BP908054 | BP905493 | BG411059 | CN130454 | BY854132 | BY857278 |
| BP908054 | BP905634 | BG411167 | AW564867 | BY854132 | BY857307 |
| BP908054 | BP906067 | BG411167 | BE125689 | BY854132 | BY857550 |
| BP908054 | BP906312 | BG411167 | BF177145 | BY854132 | BY857859 |
| BP908054 | BP906908 | BG411167 | BG947995 | BY854132 | BY858034 |
| BP908054 | BP907424 | BG411167 | BG948760 | BY854132 | BY858092 |
| BP908054 | BP907820 | BG411167 | BI075388 | BY854225 | BY854379 |
| BP908054 | BP907896 | BG411167 | BI211277 | BY854243 | BY857849 |
| BP908054 | BP908416 | BG411167 | CD431264 | BY854305 | BY854599 |
| BP908054 | BP908474 | BG411167 | CD463024 | BY854369 | BY855263 |
| BP908054 | BP908882 | BG411167 | CF427446 | BY854389 | BY854161 |
| BP908054 | BP908903 | BG411167 | CF431340 | BY854389 | BY856221 |
| BP908054 | BP909029 | BG411167 | CF431717 | BY854389 | BY857424 |
| BP908054 | BP910322 | BG411167 | CN124304 | BY854389 | BY857759 |
| BP908054 | BP910451 | BG411167 | CX608143 | BY854389 | BY857888 |
| BP908054 | BP911103 | BG411167 | CX609258 | BY854410 | BY856144 |
| BP908054 | DB679892 | BG411167 | CX610743 | BY854487 | BY857242 |
| BP908054 | DB680835 | BG411167 | CX611436 | BY854584 | BY857849 |
| BP908054 | DB680960 | BG411167 | CX612090 | BY854613 | BY855263 |
| BP908054 | DB688052 | BG411173 | CN129985 | BY854663 | BY854599 |
| BP908054 | DB691919 | BG411352 | CF484780 | BY854666 | BY854599 |
| BP908054 | DB693064 | BG411433 | BG356673 | BY854729 | BY857849 |
| BP908054 | DB694931 | BG411901 | CX607854 | BY854766 | BY857849 |
| BP908054 | DB695352 | BG411931 | BG355790 | BY854814 | BY854379 |
| BP908054 | DB696825 | BG411959 | BM328579 | BY854963 | BY855263 |
| BP908054 | DB698196 | BG412169 | BM325458 | BY855030 | BY854078 |
| BP908054 | DB701323 | BG412169 | CF427934 | BY855030 | BY854221 |
| BP908054 | DB702548 | BG412373 | CX609246 | BY855030 | BY854288 |
| BP908054 | DB704250 | BG412453 | BE360917 | BY855030 | BY854450 |
| BP908054 | DB707856 | BG412453 | CD426061 | BY855030 | BY856392 |
| BP908071 | DB713706 | BG412453 | CD430816 | BY855030 | BY858011 |
| BP908143 | DB725990 | BG412476 | CX607854 | BY855097 | BY855643 |
| BP908282 | DB725990 | BG412552 | CX607854 | BY855132 | BY854599 |
| BP908535 | BP905522 | BG412616 | BM328995 | BY855132 | BY855643 |
| BP908609 | DB680669 | BG412664 | BF656904 | BY855151 | BY855263 |
| BP908609 | DB693603 | BG412817 | AW679012 | BY855151 | BY855643 |
| BP908609 | DB698083 | BG412891 | BE359582 | BY855165 | BY857088 |
| BP908609 | DB712886 | BG462738 | BE125221 | BY855289 | BY846970 |
| BP908645 | DB690973 | BG462898 | BE918231 | BY855289 | BY854191 |
| BP908795 | DB721275 | BG463260 | AW671246 | BY855289 | BY854228 |
| BP908856 | BP897648 | BG463345 | AW671246 | BY855289 | BY854300 |



|          |          |          |          |          |          |
|----------|----------|----------|----------|----------|----------|
| BP908945 | BP910111 | BG463588 | BE355083 | BY855289 | BY854304 |
| BP908985 | DB709334 | BG463881 | CF481563 | BY855289 | BY854319 |
| BP909024 | BP897648 | BG463930 | AW679889 | BY855289 | BY854388 |
| BP909033 | BP893478 | BG463930 | BE357446 | BY855289 | BY854650 |
| BP909046 | DB686888 | BG463930 | BE595131 | BY855289 | BY854670 |
| BP909048 | BP897273 | BG463930 | BE595272 | BY855289 | BY854681 |
| BP909070 | BP897648 | BG464014 | CF480574 | BY855289 | BY854760 |
| BP909086 | BP897273 | BG464027 | BE365066 | BY855289 | BY854763 |
| BP909109 | DB678563 | BG464528 | CD426822 | BY855289 | BY854892 |
| BP909109 | DB724602 | BG464636 | CN128258 | BY855289 | BY854897 |
| BP909111 | DB718448 | BG464636 | CN128326 | BY855289 | BY855206 |
| BP909172 | DB680962 | BG464663 | CX610209 | BY855289 | BY855422 |
| BP909172 | DB681824 | BG464912 | CF429905 | BY855289 | BY855509 |
| BP909345 | BP893478 | BG465035 | BG412064 | BY855289 | BY855615 |
| BP909764 | BP896547 | BG465073 | BE125221 | BY855289 | BY855668 |
| BP909864 | BP908367 | BG487508 | BE917879 | BY855289 | BY855693 |
| BP910023 | BP875881 | BG487537 | AW564600 | BY855289 | BY855753 |
| BP910023 | BP886139 | BG487537 | BG411666 | BY855289 | BY855819 |
| BP910023 | BP898350 | BG487537 | CD427130 | BY855289 | BY855833 |
| BP910023 | DB678836 | BG487537 | CD430234 | BY855289 | BY855875 |
| BP910023 | DB692294 | BG487537 | CF429263 | BY855289 | BY855945 |
| BP910023 | DB722905 | BG487537 | CF429828 | BY855289 | BY855951 |
| BP910026 | BP910111 | BG487537 | CF432048 | BY855289 | BY855980 |
| BP910028 | BP909065 | BG487537 | CF434334 | BY855289 | BY856076 |
| BP910198 | DB701447 | BG487537 | CN124085 | BY855289 | BY856108 |
| BP910231 | DB717513 | BG556366 | CN130221 | BY855289 | BY856125 |
| BP910234 | DB711644 | BG556400 | BM331299 | BY855289 | BY856228 |
| BP910358 | BP901060 | BG556505 | CX611848 | BY855289 | BY856455 |
| BP910365 | DB706734 | BG556670 | CF480574 | BY855289 | BY856950 |
| BP910419 | BP899641 | BG557076 | BM331299 | BY855289 | BY856974 |
| BP910493 | BP888475 | BG557216 | BM331299 | BY855289 | BY857146 |
| BP910493 | BP905936 | BG649153 | BM324999 | BY855289 | BY857314 |
| BP910493 | BP906891 | BG649390 | BE917879 | BY855289 | BY857454 |
| BP910493 | BP908094 | BG649390 | CN129985 | BY855289 | BY857510 |
| BP910493 | BW692387 | BG649403 | BE600622 | BY855289 | BY857531 |
| BP910493 | DB680986 | BG649403 | CF433682 | BY855289 | BY857713 |
| BP910493 | DB687297 | BG713840 | BM328500 | BY855289 | BY857763 |
| BP910493 | DB691523 | BG739427 | BG462986 | BY855289 | BY857770 |
| BP910493 | DB691986 | BG739427 | BG557010 | BY855289 | BY857937 |
| BP910493 | DB703108 | BG739667 | BG101777 | BY855289 | BY857961 |
| BP910493 | DB705259 | BG739667 | BM322641 | BY855289 | BY857989 |
| BP910493 | DB705970 | BG739667 | CD432238 | BY855289 | BY858077 |
| BP910493 | DB707198 | BG739667 | CD463483 | BY855289 | BY858087 |
| BP910493 | DB707393 | BG932958 | AW679012 | BY855289 | BY858093 |
| BP910493 | DB709846 | BG932959 | BG933056 | BY855407 | BY855263 |
| BP910558 | BP880078 | BG932959 | CD430450 | BY855424 | BY855643 |
| BP910619 | BP875807 | BG932959 | CF428126 | BY855538 | BY854379 |
| BP910619 | BP876304 | BG932959 | CN130713 | BY855605 | BY855584 |
| BP910619 | BP876963 | BG932969 | AW679012 | BY855605 | BY855644 |
| BP910619 | BP879469 | BG933048 | BE917879 | BY855754 | BY854599 |
| BP910619 | BP881558 | BG933048 | CN129985 | BY855754 | BY855643 |
| BP910619 | BP884299 | BG933153 | CN129985 | BY855758 | BY857849 |

|          |          |          |          |          |          |
|----------|----------|----------|----------|----------|----------|
| BP910619 | BP884897 | BG933179 | CN129985 | BY855975 | BY857694 |
| BP910619 | BP886192 | BG933205 | AW679012 | BY856041 | BY857849 |
| BP910619 | BP886520 | BG933348 | CN129985 | BY856072 | BY846970 |
| BP910619 | BP887220 | BG933397 | CD428256 | BY856072 | BY854228 |
| BP910619 | BP887292 | BG933397 | CN129985 | BY856072 | BY854304 |
| BP910619 | BP889471 | BG933433 | BE917879 | BY856072 | BY854681 |
| BP910619 | BP899065 | BG933513 | BM328874 | BY856072 | BY854760 |
| BP910619 | BP899800 | BG933552 | CN129985 | BY856072 | BY854763 |
| BP910619 | BP904335 | BG947052 | BM327719 | BY856072 | BY854892 |
| BP910619 | BW686983 | BG947171 | BM330240 | BY856072 | BY855206 |
| BP910619 | DB688083 | BG947302 | BE358341 | BY856072 | BY855615 |
| BP910619 | DB694648 | BG947302 | BG948468 | BY856072 | BY855753 |
| BP910619 | DB694710 | BG947302 | BI075807 | BY856072 | BY855819 |
| BP910619 | DB699113 | BG947302 | BI075997 | BY856072 | BY855945 |
| BP910619 | DB707282 | BG947302 | BI246040 | BY856072 | BY855980 |
| BP910772 | DB694863 | BG947302 | CF429076 | BY856072 | BY856076 |
| BP910918 | BP897648 | BG947302 | CN130454 | BY856072 | BY856228 |
| BP910944 | BP900284 | BG947382 | BG273372 | BY856072 | BY856455 |
| BP910944 | DB683066 | BG947464 | CX609816 | BY856072 | BY856950 |
| BP910944 | DB719845 | BG947485 | BE598370 | BY856072 | BY856974 |
| BP911089 | BP899641 | BG947485 | BM327365 | BY856072 | BY857146 |
| BP911108 | DB679674 | BG947485 | BM331439 | BY856072 | BY857314 |
| BP911117 | BP899641 | BG947700 | CD427041 | BY856072 | BY857454 |
| BW684975 | DB693177 | BG948413 | AW671525 | BY856072 | BY857510 |
| BW685043 | BW688903 | BG948413 | BE125739 | BY856072 | BY857531 |
| BW685043 | BW690279 | BG948413 | BG946971 | BY856072 | BY857713 |
| BW685043 | BW692085 | BG948413 | BI076253 | BY856072 | BY858093 |
| BW685051 | BP880078 | BG948413 | BI098932 | BY856121 | BY854346 |
| BW685058 | DB699072 | BG948413 | BI140061 | BY856121 | BY854415 |
| BW685062 | DB687197 | BG948413 | BI246142 | BY856121 | BY854611 |
| BW685062 | DB719388 | BG948413 | CF431340 | BY856121 | BY854898 |
| BW685228 | BW688014 | BG948413 | CF433823 | BY856121 | BY855019 |
| BW685228 | BW688903 | BG948413 | CF434211 | BY856121 | BY855508 |
| BW685271 | DB715149 | BG948413 | CF485752 | BY856121 | BY856117 |
| BW685302 | DB701760 | BG948413 | CN124304 | BY856121 | BY856694 |
| BW685302 | DB704311 | BG948413 | CN127349 | BY856121 | BY857798 |
| BW685305 | DB680885 | BG948413 | CN129459 | BY856193 | BY855643 |
| BW685328 | BP883160 | BG948413 | CN130454 | BY856244 | BY854599 |
| BW685334 | BW687789 | BG948413 | CX606528 | BY856296 | BY846970 |
| BW685442 | DB724381 | BG948413 | CX606560 | BY856296 | BY854228 |
| BW685453 | DB688775 | BG948413 | CX606947 | BY856296 | BY854304 |
| BW685453 | DB722218 | BG948600 | BM323745 | BY856296 | BY854681 |
| BW685464 | BP903032 | BG948706 | AW287033 | BY856296 | BY854760 |
| BW685497 | BW692510 | BG948706 | AW680711 | BY856296 | BY854763 |
| BW685515 | DB698518 | BG948706 | AW680756 | BY856296 | BY854892 |
| BW685515 | DB717814 | BG948706 | AW681092 | BY856296 | BY855206 |
| BW685549 | BW691106 | BG948706 | AW681158 | BY856296 | BY855615 |
| BW685700 | DB694502 | BG948706 | AW745887 | BY856296 | BY855753 |
| BW685760 | DB721720 | BG948706 | AW923389 | BY856296 | BY855819 |
| BW685766 | BP885642 | BG948706 | BE354999 | BY856296 | BY855875 |
| BW685766 | BP890721 | BG948706 | BE357200 | BY856296 | BY855945 |
| BW685766 | BP891019 | BG948706 | BE357214 | BY856296 | BY855980 |

|          |          |          |          |          |          |
|----------|----------|----------|----------|----------|----------|
| BW685766 | BP891139 | BG948706 | BE358048 | BY856296 | BY856076 |
| BW685766 | BP893160 | BG948706 | BE592401 | BY856296 | BY856228 |
| BW685766 | BP893814 | BG948706 | BE918611 | BY856296 | BY856455 |
| BW685766 | BW685170 | BG948706 | BG049042 | BY856296 | BY856950 |
| BW685766 | BW685340 | BG948706 | BG049271 | BY856296 | BY856974 |
| BW685766 | BW685390 | BG948706 | BG159231 | BY856296 | BY857146 |
| BW685766 | BW685564 | BG948706 | BG357931 | BY856296 | BY857314 |
| BW685766 | BW685615 | BG948706 | BG411861 | BY856296 | BY857454 |
| BW685766 | BW686291 | BG948706 | BG412817 | BY856296 | BY857510 |
| BW685766 | BW686386 | BG948706 | CD462659 | BY856296 | BY857531 |
| BW685766 | BW686392 | BG948706 | CX612023 | BY856296 | BY857713 |
| BW685766 | BW687019 | BG948801 | AW563975 | BY856296 | BY858093 |
| BW685766 | BW687172 | BI074455 | BG355790 | BY856323 | BY855263 |
| BW685766 | BW687181 | BI074542 | CF482636 | BY856400 | BY857849 |
| BW685766 | BW687414 | BI074747 | BG273481 | BY856495 | BY855514 |
| BW685766 | BW688073 | BI074747 | CF428807 | BY856603 | BY854415 |
| BW685766 | BW688438 | BI074870 | CX606687 | BY856603 | BY854611 |
| BW685766 | BW689007 | BI075041 | BI074531 | BY856603 | BY854898 |
| BW685766 | BW689015 | BI075215 | AW671921 | BY856603 | BY855019 |
| BW685766 | BW689235 | BI075215 | CF074064 | BY856603 | BY855508 |
| BW685766 | BW689359 | BI075346 | CN128326 | BY856603 | BY856117 |
| BW685766 | BW689494 | BI075602 | BM328500 | BY856603 | BY856694 |
| BW685766 | BW689740 | BI075724 | BM328579 | BY856662 | BY854198 |
| BW685766 | BW690666 | BI075891 | AW286940 | BY856662 | BY854850 |
| BW685766 | BW690686 | BI075891 | AW564867 | BY856879 | BY854599 |
| BW685766 | BW690702 | BI075891 | AW671525 | BY856954 | BY857849 |
| BW685766 | BW690936 | BI075891 | AW744884 | BY857001 | BY855643 |
| BW685766 | BW691157 | BI075891 | BE125689 | BY857023 | BY854379 |
| BW685766 | BW691213 | BI075891 | BE125739 | BY857123 | BY854379 |
| BW685766 | BW692155 | BI075891 | BE359342 | BY857149 | BY854599 |
| BW685766 | BW692191 | BI075891 | BF177145 | BY857213 | AV836516 |
| BW685766 | BW692681 | BI075891 | BG355424 | BY857213 | BJ470517 |
| BW685766 | BW692916 | BI075891 | BG946971 | BY857225 | BY854454 |
| BW685766 | DB714484 | BI075891 | BG947995 | BY857225 | BY855328 |
| BW685766 | DB716790 | BI075891 | BG948607 | BY857225 | BY856947 |
| BW685766 | DB721878 | BI075891 | BG948760 | BY857225 | BY857519 |
| BW685766 | DB723830 | BI075891 | BI075388 | BY857225 | BY857903 |
| BW685786 | DB687197 | BI075891 | BI076253 | BY857316 | BY855263 |
| BW685791 | BW688903 | BI075891 | BI098932 | BY857316 | BY855643 |
| BW685817 | DB720170 | BI075891 | BI140061 | BY857360 | BY854379 |
| BW685818 | DB723757 | BI075891 | BI211277 | BY857365 | BY854599 |
| BW685848 | DB717313 | BI075891 | BI246142 | BY857365 | BY855263 |
| BW685989 | BW691106 | BI075891 | CD431264 | BY857460 | BY854599 |
| BW686005 | BW688903 | BI075891 | CD463024 | BY857474 | BY854613 |
| BW686070 | BP903475 | BI075891 | CF427446 | BY857474 | BY855151 |
| BW686073 | BW689483 | BI075891 | CF431340 | BY857474 | BY855500 |
| BW686074 | DB716610 | BI075891 | CF431717 | BY857474 | BY856092 |
| BW686124 | DB697556 | BI075891 | CF433823 | BY857474 | BY856604 |
| BW686144 | DB700881 | BI075891 | CF434211 | BY857477 | BY855643 |
| BW686152 | DB711603 | BI075891 | CF485752 | BY857558 | BY855514 |
| BW686157 | DB713703 | BI075891 | CN124304 | BY857572 | BY857849 |
| BW686161 | DB710277 | BI075891 | CN127349 | BY857597 | BY854599 |

|          |          |          |          |          |          |
|----------|----------|----------|----------|----------|----------|
| BW686193 | DB699072 | BI075891 | CN129459 | BY857597 | BY855643 |
| BW686256 | BP904827 | BI075891 | CN130454 | BY857598 | BY854599 |
| BW686256 | BW685102 | BI075891 | CX606528 | BY857598 | BY855643 |
| BW686256 | BW686698 | BI075891 | CX606560 | BY857606 | BY857849 |
| BW686256 | DB689912 | BI075891 | CX606947 | BY857631 | BY854379 |
| BW686302 | DB700881 | BI075891 | CX608143 | BY857689 | BY854379 |
| BW686312 | BP885631 | BI075891 | CX610743 | BY857692 | BY858124 |
| BW686357 | DB706702 | BI075891 | CX611436 | BY857702 | BY857849 |
| BW686378 | BW688014 | BI075891 | CX612090 | BY857895 | BY854379 |
| BW686378 | BW690279 | BI076246 | BE125739 | BY857968 | BY848599 |
| BW686420 | DB726384 | BI076246 | BG054155 | BY857968 | BY854104 |
| BW686473 | BP892940 | BI076246 | BG357888 | BY857968 | BY854218 |
| BW686482 | BP882161 | BI076246 | BG463890 | BY857968 | BY854262 |
| BW686482 | BP886214 | BI076246 | BG948468 | BY857968 | BY854629 |
| BW686482 | BW692085 | BI076246 | BG948607 | BY857968 | BY854695 |
| BW686520 | BW685507 | BI076246 | BG948760 | BY857968 | BY854702 |
| BW686522 | DB717044 | BI076246 | CF430529 | BY857968 | BY854811 |
| BW686580 | DB703982 | BI076246 | CF434211 | BY857968 | BY855099 |
| BW686580 | DB708150 | BI076246 | CN128992 | BY857968 | BY855113 |
| BW686602 | BP889695 | BI076246 | CN129459 | BY857968 | BY855699 |
| BW686602 | BP892999 | BI076246 | CN130437 | BY857968 | BY855703 |
| BW686602 | BW685335 | BI076268 | BF317887 | BY857968 | BY855831 |
| BW686602 | BW685809 | BI097871 | AW563539 | BY857968 | BY855834 |
| BW686602 | BW685949 | BI097871 | BI140152 | BY857968 | BY856416 |
| BW686602 | BW686183 | BI097871 | BM329683 | BY857968 | BY856470 |
| BW686602 | BW687166 | BI097871 | BM331525 | BY857968 | BY857090 |
| BW686602 | BW688738 | BI098008 | CF073992 | BY857968 | BY857530 |
| BW686602 | BW689362 | BI098268 | CD423977 | BY857968 | BY857543 |
| BW686602 | DB717750 | BI098268 | CF072549 | BY857968 | BY857559 |
| BW686602 | DB723283 | BI098268 | CF433693 | BY857968 | BY857595 |
| BW686607 | BP880625 | BI098422 | BG322598 | BY857968 | BY857790 |
| BW686607 | BP887051 | BI098422 | CF432168 | BY857968 | BY857800 |
| BW686643 | DB720170 | BI098422 | CX609272 | BY857968 | BY857809 |
| BW686668 | BW692085 | BI098543 | BG947650 | BY857968 | BY857870 |
| BW686692 | DB702511 | BI098853 | CD424514 | BY857968 | BY858001 |
| BW686706 | BP875919 | BI098853 | CD424703 | BY858044 | AV925011 |
| BW686706 | DB693318 | BI098853 | CF071173 | BY858044 | BY857461 |
| BW686706 | DB701908 | BI098853 | CF071198 | BY858051 | BY857849 |
| BW686748 | BP886214 | BI098853 | CF071416 | BY858134 | BY855084 |
| BW686802 | BW689144 | BI098853 | CF071956 | BY858134 | BY857571 |
| BW686802 | DB713874 | BI098853 | CF072623 | BY858137 | BY837166 |
| BW686849 | DB681700 | BI098853 | CF073574 | BY858137 | BY840812 |
| BW686849 | DB683995 | BI098853 | CF073612 | BY858137 | BY840815 |
| BW686849 | DB708150 | BI098853 | CF073906 | BY858137 | BY846164 |
| BW686904 | DB697379 | BI098853 | CX607268 | BY858137 | BY851644 |
| BW686920 | BW687141 | BI098961 | CD432683 | BY858137 | BY854470 |
| BW687024 | DB713225 | BI099066 | BM328579 | BY858137 | BY854475 |
| BW687036 | BW690372 | BI099304 | BI245946 | BY858137 | BY854681 |
| BW687036 | BW691378 | BI139795 | AW671525 | BY858137 | BY854790 |
| BW687051 | BP882161 | BI139795 | BE125739 | BY858137 | BY854883 |
| BW687051 | BP886214 | BI139795 | BE358341 | BY858137 | BY854897 |
| BW687051 | BW692085 | BI139795 | BI076253 | BY858137 | BY854958 |

|          |          |          |          |          |          |
|----------|----------|----------|----------|----------|----------|
| BW687056 | DB720968 | BI139795 | CF429076 | BY858137 | BY855022 |
| BW687125 | DB714138 | BI139795 | CF431340 | BY858137 | BY855124 |
| BW687127 | BW692085 | BI139795 | CF433823 | BY858137 | BY855367 |
| BW687153 | BP882161 | BI139795 | CF434211 | BY858137 | BY855651 |
| BW687153 | BP886214 | BI139795 | CF485752 | BY858137 | BY855693 |
| BW687153 | BW692085 | BI139795 | CN124304 | BY858137 | BY855809 |
| BW687163 | BP884763 | BI139795 | CN127349 | BY858137 | BY856059 |
| BW687180 | DB717044 | BI139795 | CN129459 | BY858137 | BY856106 |
| BW687226 | DB726640 | BI139795 | CN130454 | BY858137 | BY856284 |
| BW687255 | BW686813 | BI139795 | CX606528 | BY858137 | BY856455 |
| BW687276 | BW688014 | BI139795 | CX606560 | BY858137 | BY856509 |
| BW687316 | BW688014 | BI139795 | CX606947 | BY858137 | BY856762 |
| BW687343 | BW692892 | BI139795 | CX611300 | BY858137 | BY856883 |
| BW687402 | BP877566 | BI140081 | AW286143 | BY858137 | BY856916 |
| BW687431 | BP883160 | BI140366 | AW565869 | BY858137 | BY856950 |
| BW687431 | BP886214 | BI140366 | AW747209 | BY858137 | BY857046 |
| BW687476 | BW685319 | BI140366 | AW924448 | BY858137 | BY857087 |
| BW687518 | DB716102 | BI140366 | BE353125 | BY858137 | BY857118 |
| BW687542 | BW692510 | BI140366 | BE362016 | BY858137 | BY857512 |
| BW687549 | BP884763 | BI140366 | BG047904 | BY858137 | BY857644 |
| BW687610 | DB696047 | BI140366 | BG047981 | BY858137 | BY857667 |
| BW687614 | DB700735 | BI140366 | BG049734 | BY858137 | BY857864 |
| BW687636 | BP882161 | BI140366 | BG054111 | BY858234 | AV915377 |
| BW687636 | BW692085 | BI140366 | BG412489 | BY858341 | BJ547341 |
| BW687636 | DB724556 | BI140366 | BG463516 | BY858434 | AV921292 |
| BW687642 | BP877566 | BI140366 | BG464420 | BY858434 | AV923449 |
| BW687655 | DB687197 | BI140366 | BG464622 | BY858434 | BY858793 |
| BW687681 | DB700450 | BI140366 | BG948232 | BY858434 | BY859395 |
| BW687713 | DB712719 | BI140366 | BI074979 | BY858434 | BY862497 |
| BW687763 | BP884763 | BI140366 | BM318335 | BY858434 | BY865695 |
| BW687831 | BW690229 | BI140383 | BM327719 | BY858434 | BY865885 |
| BW687854 | DB687197 | BI140912 | AW285894 | BY858434 | BY866210 |
| BW687885 | DB725497 | BI140912 | AW286136 | BY858434 | BY866499 |
| BW687885 | DB726820 | BI140912 | AW564510 | BY858434 | BY867335 |
| BW687928 | DB679913 | BI140912 | AW671025 | BY858434 | BY867658 |
| BW687931 | DB680313 | BI140912 | BE125887 | BY858434 | BY867782 |
| BW688008 | DB680885 | BI140912 | BF177145 | BY858434 | BY868181 |
| BW688017 | BP895491 | BI140912 | BI075998 | BY858434 | BY871480 |
| BW688214 | BP892321 | BI140912 | BI211277 | BY858434 | BY871492 |
| BW688214 | BW686572 | BI140912 | BI211283 | BY858651 | AV915668 |
| BW688218 | BP886560 | BI140912 | BI245898 | BY859692 | AV928479 |
| BW688314 | BP884763 | BI140912 | BI246040 | BY859971 | AV919492 |
| BW688327 | BW686666 | BI140912 | CF427446 | BY861348 | AV920451 |
| BW688330 | DB681596 | BI140912 | CF430687 | BY861348 | BY859393 |
| BW688397 | DB700735 | BI140912 | CF431904 | BY861348 | BY869653 |
| BW688400 | BP888127 | BI140912 | CN127349 | BY861348 | BY870204 |
| BW688417 | DB687197 | BI140912 | CN128992 | BY861570 | AV920597 |
| BW688530 | BP880078 | BI140912 | CN129459 | BY862964 | AV919532 |
| BW688533 | BP885642 | BI140912 | CX610743 | BY862964 | AV919920 |
| BW688533 | BP890721 | BI140912 | CX612090 | BY862964 | AV924647 |
| BW688533 | BP891019 | BI141091 | AW283625 | BY862964 | AV928610 |
| BW688533 | BP891139 | BI141176 | BE918231 | BY862964 | AV928626 |

|          |          |          |          |          |          |
|----------|----------|----------|----------|----------|----------|
| BW688533 | BP893160 | BI141223 | AW563975 | BY862964 | AV928627 |
| BW688533 | BP893814 | BI211245 | CF428751 | BY862964 | AV929741 |
| BW688533 | BW685170 | BI211367 | AW671525 | BY862964 | AV930230 |
| BW688533 | BW685340 | BI211367 | AW744884 | BY863812 | AV925863 |
| BW688533 | BW685390 | BI211367 | BE125689 | BY863847 | BY861278 |
| BW688533 | BW685564 | BI211367 | BE125739 | BY864065 | AV930737 |
| BW688533 | BW685615 | BI211367 | BE359342 | BY864065 | AV934406 |
| BW688533 | BW686291 | BI211367 | BF177145 | BY864065 | AV934655 |
| BW688533 | BW686386 | BI211367 | BG355424 | BY864065 | AV934681 |
| BW688533 | BW686392 | BI211367 | BI076253 | BY864065 | AV935353 |
| BW688533 | BW687019 | BI211367 | BI211277 | BY864065 | AV935371 |
| BW688533 | BW687172 | BI211367 | CD431264 | BY864065 | AV935532 |
| BW688533 | BW687181 | BI211367 | CD463024 | BY864065 | AV935538 |
| BW688533 | BW687322 | BI211367 | CF427446 | BY864065 | AV936121 |
| BW688533 | BW687414 | BI211367 | CF431340 | BY864065 | AV936122 |
| BW688533 | BW688073 | BI211367 | CF431717 | BY864065 | AV936140 |
| BW688533 | BW688438 | BI211367 | CF433823 | BY864065 | AV936489 |
| BW688533 | BW689007 | BI211367 | CF434211 | BY864065 | AV936747 |
| BW688533 | BW689015 | BI211367 | CF485752 | BY864065 | AV937019 |
| BW688533 | BW689235 | BI211367 | CN124304 | BY864065 | BJ471598 |
| BW688533 | BW689359 | BI211367 | CN127349 | BY864065 | BJ472797 |
| BW688533 | BW689494 | BI211367 | CN129459 | BY864065 | BJ473908 |
| BW688533 | BW689740 | BI211367 | CN130454 | BY864065 | BJ474083 |
| BW688533 | BW690666 | BI211367 | CX606528 | BY864065 | BJ474547 |
| BW688533 | BW690686 | BI211367 | CX606560 | BY864065 | BJ474671 |
| BW688533 | BW690702 | BI211367 | CX606947 | BY864065 | BJ474736 |
| BW688533 | BW690936 | BI211367 | CX608143 | BY864065 | BJ475902 |
| BW688533 | BW691157 | BI211367 | CX609258 | BY864065 | BJ476099 |
| BW688533 | BW691213 | BI211367 | CX610743 | BY864065 | BJ476445 |
| BW688533 | BW692155 | BI211367 | CX611300 | BY864065 | BJ476481 |
| BW688533 | BW692191 | BI211367 | CX611436 | BY864065 | BJ477412 |
| BW688533 | BW692681 | BI211367 | CX612090 | BY864065 | BJ477450 |
| BW688533 | BW692916 | BI211457 | CF482636 | BY864065 | BJ477490 |
| BW688533 | DB714484 | BI211772 | BM328579 | BY864065 | BJ477532 |
| BW688533 | DB716790 | BI211935 | CD430583 | BY864353 | BY861308 |
| BW688533 | DB721878 | BI211950 | AW671525 | BY864353 | BY866538 |
| BW688533 | DB723830 | BI211950 | AW744884 | BY866355 | BJ473567 |
| BW688546 | BW687141 | BI211950 | BE125739 | BY866355 | BJ476193 |
| BW688583 | DB714454 | BI211950 | BE359342 | BY866825 | AV913145 |
| BW688592 | BP907817 | BI211950 | BG355424 | BY867380 | BY858778 |
| BW688617 | BP882942 | BI211950 | BI076253 | BY867380 | BY868269 |
| BW688694 | BP883160 | BI211950 | CF431340 | BY867716 | AV924107 |
| BW688703 | BP884711 | BI211950 | CF433823 | BY868004 | BY861308 |
| BW688712 | DB699072 | BI211950 | CF434211 | BY868004 | BY866538 |
| BW688723 | DB714454 | BI211950 | CF485752 | BY868674 | BY867540 |
| BW688731 | BP887635 | BI211950 | CN124304 | BY869111 | BY867002 |
| BW688792 | DB726822 | BI211950 | CN127349 | BY869556 | BY867002 |
| BW688804 | BP882376 | BI211950 | CN129459 | BY869965 | BY868018 |
| BW688804 | DB723880 | BI211950 | CN130454 | BY870604 | AV931601 |
| BW688828 | BW688903 | BI211950 | CX606528 | BY871502 | BJ466387 |
| BW688828 | BW690279 | BI211950 | CX606560 | BY871502 | BY871507 |
| BW688828 | BW692085 | BI211950 | CX606947 | BY871502 | BY872355 |

|          |          |          |          |          |          |
|----------|----------|----------|----------|----------|----------|
| BW688836 | BP892321 | BI245572 | CF072007 | BY872059 | BY871745 |
| BW688836 | BW686572 | BI245784 | CD432603 | BY872402 | BY871745 |
| BW688881 | BP884763 | BI246005 | BE125689 | BY872540 | BY861308 |
| BW688936 | DB701364 | BI246005 | BE125739 | BY872540 | BY866538 |
| BW688936 | DB723444 | BI246005 | BF177145 | BY873047 | BY871745 |
| BW688969 | BW692085 | BI246005 | BG054155 | BY873308 | BY873852 |
| BW688978 | BP884763 | BI246005 | BG357888 | BY873487 | BY871745 |
| BW689219 | DB700735 | BI246005 | BG463890 | BY873746 | AV932110 |
| BW689328 | BP884763 | BI246005 | BG948468 | BY873746 | BJ473647 |
| BW689346 | BP886214 | BI246005 | BI211283 | BY873746 | BJ474227 |
| BW689366 | BP882161 | BI246005 | CF430529 | BY873746 | BJ474721 |
| BW689366 | BW692085 | BI246005 | CF434211 | BY873746 | BJ474862 |
| BW689413 | DB683995 | BI246005 | CN128992 | BY874087 | BY871745 |
| BW689482 | BW688903 | BI246005 | CN129459 | BY874357 | AV918285 |
| BW689501 | BW692368 | BI246005 | CN130437 | BY874357 | AV923841 |
| BW689514 | DB717387 | BI246005 | CX609258 | BY874357 | AV927371 |
| BW689519 | BW687141 | BI246110 | CF427103 | BY874357 | AV931127 |
| BW689525 | DB678583 | BI246110 | CF489244 | BY875830 | BJ468612 |
| BW689557 | BP892321 | BI351066 | CF480574 | BY875933 | BY876967 |
| BW689561 | BW692085 | BI351128 | CD430180 | BY876434 | BJ468612 |
| BW689561 | DB724556 | BI351134 | BM331063 | BY876632 | BJ468612 |
| BW689638 | DB714454 | BI351141 | BI075484 | BY877069 | BJ468612 |
| BW689758 | BP882942 | BI351141 | BM328904 | BY877515 | BJ462780 |
| BW689766 | BW689483 | BI351144 | AW284856 | BY877883 | BJ468612 |
| BW689911 | DB713706 | BI351144 | AW565455 |          |          |
| BW689928 | DB702926 | BI351144 | AW565802 |          |          |
| BW689964 | DB687197 | BI351144 | BI076402 |          |          |
| BW689964 | DB719388 | BI351144 | BI099371 |          |          |
| BW689976 | BW691106 | BI351144 | BI141349 |          |          |
| BW689996 | BW688903 | BI351144 | BI245811 |          |          |
| BW690039 | DB698442 | BI351144 | CD423890 |          |          |
| BW690081 | BP884763 | BI351144 | CD427197 |          |          |
| BW690083 | BP882161 | BI351144 | CD462001 |          |          |
| BW690083 | BW692085 | BI351144 | CF071011 |          |          |
| BW690134 | DB725875 | BI351144 | CF071894 |          |          |
| BW690166 | DB725332 | BI351144 | CF073736 |          |          |
| BW690172 | BP883627 | BI351144 | CF430702 |          |          |
| BW690172 | DB710796 | BI351155 | BM328579 |          |          |
| BW690176 | BW691106 | BI351168 | BM327740 |          |          |
| BW690206 | BW690230 | BI351171 | CF430976 |          |          |
| BW690221 | BP885642 | BI351178 | BG048228 |          |          |
| BW690221 | BP890721 | BI351378 | BE355021 |          |          |
| BW690221 | BP891019 | BI643606 | CF485009 |          |          |
| BW690221 | BP891139 | BI643744 | BI074649 |          |          |
| BW690221 | BP893160 | BM317455 | CF073216 |          |          |
| BW690221 | BP893814 | BM317470 | CX608251 |          |          |
| BW690221 | BW685170 | BM317609 | AW563975 |          |          |
| BW690221 | BW685340 | BM317735 | BG817499 |          |          |
| BW690221 | BW685390 | BM317736 | BE917879 |          |          |
| BW690221 | BW685564 | BM317736 | CN129985 |          |          |
| BW690221 | BW685615 | BM317739 | AW677702 |          |          |
| BW690221 | BW686291 | BM317739 | AW678058 |          |          |

|          |          |          |          |
|----------|----------|----------|----------|
| BW690221 | BW686386 | BM317739 | AW678066 |
| BW690221 | BW686392 | BM317739 | AW678069 |
| BW690221 | BW687019 | BM317739 | AW678139 |
| BW690221 | BW687172 | BM317739 | AW678147 |
| BW690221 | BW687181 | BM317739 | AW678171 |
| BW690221 | BW687322 | BM317739 | AW678495 |
| BW690221 | BW687414 | BM317739 | AW678655 |
| BW690221 | BW688073 | BM317739 | AW678674 |
| BW690221 | BW688438 | BM317739 | AW678993 |
| BW690221 | BW689007 | BM317739 | AW679878 |
| BW690221 | BW689015 | BM317739 | AW680055 |
| BW690221 | BW689235 | BM317739 | AW680058 |
| BW690221 | BW689359 | BM317739 | AW680977 |
| BW690221 | BW689494 | BM317739 | AW745350 |
| BW690221 | BW689740 | BM317739 | AW745601 |
| BW690221 | BW690666 | BM317739 | AW745742 |
| BW690221 | BW690686 | BM317739 | AW746028 |
| BW690221 | BW690702 | BM317739 | AW746252 |
| BW690221 | BW690936 | BM317739 | AW746608 |
| BW690221 | BW691157 | BM317739 | AW746905 |
| BW690221 | BW691213 | BM317739 | AW746969 |
| BW690221 | BW692155 | BM317739 | AW747499 |
| BW690221 | BW692191 | BM317739 | AW924740 |
| BW690221 | BW692681 | BM317739 | AW924946 |
| BW690221 | BW692916 | BM317739 | AW925126 |
| BW690221 | DB714484 | BM317739 | BE363214 |
| BW690221 | DB716790 | BM317739 | BE363256 |
| BW690221 | DB721878 | BM317739 | BE363282 |
| BW690221 | DB723830 | BM317739 | BE363294 |
| BW690250 | DB725545 | BM317739 | BE363392 |
| BW690325 | BW687141 | BM317739 | BE363526 |
| BW690357 | DB683995 | BM317739 | BE363811 |
| BW690357 | DB703982 | BM317739 | BE592612 |
| BW690357 | DB708150 | BM317739 | BE592743 |
| BW690357 | DB716610 | BM317739 | BE592803 |
| BW690360 | BP882942 | BM317739 | BE593082 |
| BW690361 | DB688782 | BM317739 | BE593153 |
| BW690393 | BW692085 | BM317739 | BE593971 |
| BW690393 | DB724556 | BM317739 | BE593994 |
| BW690446 | BP892321 | BM317739 | BG933119 |
| BW690446 | BW686572 | BM317739 | BG933124 |
| BW690525 | DB687197 | BM317747 | BE917879 |
| BW690562 | BP876905 | BM317805 | CF434171 |
| BW690562 | BP889841 | BM317982 | BM331299 |
| BW690562 | BP891130 | BM318113 | BG054241 |
| BW690562 | BP891139 | BM318124 | AW285564 |
| BW690562 | BP893011 | BM318124 | AW678349 |
| BW690562 | BP894601 | BM318124 | AW680214 |
| BW690562 | BP895331 | BM318124 | AW680575 |
| BW690562 | BP897318 | BM318124 | AW922844 |
| BW690562 | BP898159 | BM318124 | BE356398 |
| BW690562 | BP898422 | BM318124 | BE357625 |



|          |          |          |          |
|----------|----------|----------|----------|
| BW690562 | BW685138 | BM318124 | BE361648 |
| BW690562 | BW685163 | BM318124 | BE363254 |
| BW690562 | BW685390 | BM318124 | BE363295 |
| BW690562 | BW685395 | BM318124 | BE363413 |
| BW690562 | BW685401 | BM318124 | BE363935 |
| BW690562 | BW685484 | BM318124 | BE592157 |
| BW690562 | BW685615 | BM318124 | BE593309 |
| BW690562 | BW685647 | BM318124 | BE917797 |
| BW690562 | BW686205 | BM318124 | BG158196 |
| BW690562 | BW686291 | BM318124 | BG933192 |
| BW690562 | BW687181 | BM318124 | CD423494 |
| BW690562 | BW687280 | BM318124 | CD423585 |
| BW690562 | BW687322 | BM318124 | CD427382 |
| BW690562 | BW687629 | BM318124 | CD428008 |
| BW690562 | BW688460 | BM318124 | CN126248 |
| BW690562 | BW688472 | BM318141 | BM331299 |
| BW690562 | BW688580 | BM318223 | CX607854 |
| BW690562 | BW688603 | BM318367 | BG356673 |
| BW690562 | BW688643 | BM318524 | AW285447 |
| BW690562 | BW688820 | BM318587 | AW563848 |
| BW690562 | BW689117 | BM318587 | BE596574 |
| BW690562 | BW689350 | BM318671 | AW283625 |
| BW690562 | BW689467 | BM318683 | CD431270 |
| BW690562 | BW689555 | BM322263 | CD429323 |
| BW690562 | BW689690 | BM322300 | BG947804 |
| BW690562 | BW690231 | BM322307 | BE363038 |
| BW690562 | BW690335 | BM322634 | BE595243 |
| BW690562 | BW690377 | BM322961 | BM322322 |
| BW690562 | BW690473 | BM323163 | BM325721 |
| BW690562 | BW690474 | BM323184 | BM325721 |
| BW690562 | BW690666 | BM323213 | AW563975 |
| BW690562 | BW690936 | BM323255 | CD428607 |
| BW690562 | BW691274 | BM323255 | CD432667 |
| BW690562 | BW691554 | BM323255 | CF428194 |
| BW690562 | BW691943 | BM323255 | CF430379 |
| BW690562 | BW692191 | BM323255 | CF432415 |
| BW690562 | BW692681 | BM323255 | CN125336 |
| BW690562 | DB716785 | BM323255 | CN126343 |
| BW690562 | DB720691 | BM323255 | CN129120 |
| BW690562 | DB721878 | BM323594 | BM325721 |
| BW690562 | DB722988 | BM324074 | BI141166 |
| BW690562 | DB723030 | BM324206 | AW287664 |
| BW690598 | DB711649 | BM324227 | BM323848 |
| BW690598 | DB717050 | BM324672 | CF431234 |
| BW690661 | BP880078 | BM324785 | BE595243 |
| BW690752 | BP892321 | BM324830 | BG464187 |
| BW690858 | DB726830 | BM325160 | BE917879 |
| BW690932 | DB687197 | BM325160 | CD428256 |
| BW690932 | DB719388 | BM325160 | CN129985 |
| BW690983 | BP892321 | BM325169 | BE357573 |
| BW690983 | BW686572 | BM325169 | CF489930 |
| BW690990 | BW692085 | BM325205 | BG322773 |

|          |          |          |          |
|----------|----------|----------|----------|
| BW691082 | BW691624 | BM325414 | BM322629 |
| BW691119 | BP883160 | BM325419 | CX610162 |
| BW691119 | BP886214 | BM325478 | BE595243 |
| BW691176 | BP892442 | BM326066 | CF433691 |
| BW691386 | BW686666 | BM326292 | BE360362 |
| BW691399 | DB680094 | BM326292 | BI140774 |
| BW691454 | BW687141 | BM326382 | BM323432 |
| BW691484 | DB700735 | BM326438 | BM317516 |
| BW691495 | DB714454 | BM326513 | AW287664 |
| BW691550 | BW686666 | BM326539 | CD428312 |
| BW691560 | BP876905 | BM326903 | BM318613 |
| BW691560 | BP889841 | BM326903 | CF429299 |
| BW691560 | BP891130 | BM326903 | CF430549 |
| BW691560 | BP891139 | BM326976 | BM328579 |
| BW691560 | BP893011 | BM326999 | BM331299 |
| BW691560 | BP894601 | BM327136 | BM331299 |
| BW691560 | BP895331 | BM327485 | CF487406 |
| BW691560 | BP897318 | BM327707 | CD462778 |
| BW691560 | BP898159 | BM327902 | BM328579 |
| BW691560 | BP898422 | BM327951 | BM331299 |
| BW691560 | BW685138 | BM328016 | BM331299 |
| BW691560 | BW685163 | BM328029 | BE597122 |
| BW691560 | BW685390 | BM328247 | CN128524 |
| BW691560 | BW685395 | BM328267 | CX607854 |
| BW691560 | BW685401 | BM328326 | BM331299 |
| BW691560 | BW685484 | BM328339 | BE599250 |
| BW691560 | BW685615 | BM328406 | BM322372 |
| BW691560 | BW685647 | BM328427 | BM331299 |
| BW691560 | BW686205 | BM328503 | BM318308 |
| BW691560 | BW686291 | BM328713 | BG356673 |
| BW691560 | BW687181 | BM328853 | CF070743 |
| BW691560 | BW687280 | BM328913 | BE595601 |
| BW691560 | BW687322 | BM329127 | BM331299 |
| BW691560 | BW687629 | BM329163 | BM327719 |
| BW691560 | BW688460 | BM329163 | BM328579 |
| BW691560 | BW688472 | BM329440 | CX611848 |
| BW691560 | BW688580 | BM329618 | BG556681 |
| BW691560 | BW688603 | BM329653 | BE359078 |
| BW691560 | BW688643 | BM329691 | CD429586 |
| BW691560 | BW688820 | BM329741 | CX611848 |
| BW691560 | BW689117 | BM329838 | CX610209 |
| BW691560 | BW689350 | BM329853 | CX610209 |
| BW691560 | BW689467 | BM329904 | CF486336 |
| BW691560 | BW689555 | BM329967 | BE355149 |
| BW691560 | BW689690 | BM330140 | BM328579 |
| BW691560 | BW690231 | BM330232 | BE364211 |
| BW691560 | BW690335 | BM330281 | CD462806 |
| BW691560 | BW690377 | BM330419 | BG356673 |
| BW691560 | BW690473 | BM330468 | BE599250 |
| BW691560 | BW690474 | BM330571 | AW285611 |
| BW691560 | BW690666 | BM330571 | BG054241 |
| BW691560 | BW690936 | BM330650 | BE597173 |

|          |          |          |          |
|----------|----------|----------|----------|
| BW691560 | BW691274 | BM330664 | CF072007 |
| BW691560 | BW691554 | BM330982 | CF480574 |
| BW691560 | BW691943 | BM331165 | BE366244 |
| BW691560 | BW692191 | BM331238 | BM328880 |
| BW691560 | BW692681 | BM331238 | CF481661 |
| BW691560 | DB716785 | BM331343 | CN128524 |
| BW691560 | DB720691 | BM331344 | CF432373 |
| BW691560 | DB721878 | BM331388 | BG355790 |
| BW691560 | DB722988 | BM331521 | BM331299 |
| BW691560 | DB723030 | BM331590 | BM327719 |
| BW691577 | DB684419 | BM331607 | BM328648 |
| BW691637 | BW687359 | BM331628 | CD428312 |
| BW691721 | DB700881 | CD422874 | AW680060 |
| BW691730 | DB701760 | CD422874 | BI099389 |
| BW691730 | DB704311 | CD422874 | CD423594 |
| BW691755 | DB681700 | CD422874 | CF071627 |
| BW691755 | DB683995 | CD422939 | CD423030 |
| BW691755 | DB708150 | CD422939 | CD423156 |
| BW691789 | BP886214 | CD422939 | CD423632 |
| BW691807 | BP885631 | CD422939 | CD423646 |
| BW691859 | DB717071 | CD422939 | CD424513 |
| BW691905 | BW687027 | CD422939 | CD424989 |
| BW691921 | BW686666 | CD422939 | CD425180 |
| BW691999 | DB712719 | CD422939 | CD426003 |
| BW692042 | BW686572 | CD422939 | CD427443 |
| BW692121 | BW686023 | CD422939 | CD461926 |
| BW692169 | BP900789 | CD422988 | AW563899 |
| BW692258 | BP885642 | CD422988 | AW745435 |
| BW692258 | BP890721 | CD422988 | CD426259 |
| BW692258 | BP891019 | CD422988 | CD431266 |
| BW692258 | BP891139 | CD422988 | CF427247 |
| BW692258 | BP893160 | CD423171 | CN130456 |
| BW692258 | BP893814 | CD423171 | CN131274 |
| BW692258 | BW685170 | CD423171 | CX609770 |
| BW692258 | BW685340 | CD423171 | CX611400 |
| BW692258 | BW685390 | CD423299 | CF481788 |
| BW692258 | BW685564 | CD423332 | BE600019 |
| BW692258 | BW685615 | CD423477 | AW671921 |
| BW692258 | BW686291 | CD423477 | CF074064 |
| BW692258 | BW686386 | CD423495 | CF487939 |
| BW692258 | BW686392 | CD423651 | BE917879 |
| BW692258 | BW687019 | CD423651 | CD428256 |
| BW692258 | BW687172 | CD423651 | CN129985 |
| BW692258 | BW687181 | CD423677 | BE597592 |
| BW692258 | BW687322 | CD423677 | CN129676 |
| BW692258 | BW687414 | CD423701 | CD430583 |
| BW692258 | BW688073 | CD423764 | BE356920 |
| BW692258 | BW688438 | CD423764 | CX607821 |
| BW692258 | BW689007 | CD423764 | CX607899 |
| BW692258 | BW689015 | CD423851 | BG356488 |
| BW692258 | BW689235 | CD423851 | BI211493 |
| BW692258 | BW689359 | CD423851 | BI211559 |

|          |          |          |          |
|----------|----------|----------|----------|
| BW692258 | BW689494 | CD423851 | BM329547 |
| BW692258 | BW689740 | CD423851 | CF071011 |
| BW692258 | BW690666 | CD423947 | CD424780 |
| BW692258 | BW690686 | CD423977 | CD430583 |
| BW692258 | BW690702 | CD424016 | CN128524 |
| BW692258 | BW690936 | CD424044 | CD462088 |
| BW692258 | BW691157 | CD424071 | AW672057 |
| BW692258 | BW691213 | CD424080 | AW672285 |
| BW692258 | BW692155 | CD424080 | AW681051 |
| BW692258 | BW692191 | CD424080 | AW746579 |
| BW692258 | BW692681 | CD424080 | AW746879 |
| BW692258 | BW692916 | CD424080 | BM322349 |
| BW692258 | DB714484 | CD424080 | BM324022 |
| BW692258 | DB716790 | CD424080 | BM326834 |
| BW692258 | DB721878 | CD424080 | BM328534 |
| BW692258 | DB723830 | CD424080 | CD424940 |
| BW692262 | BW692510 | CD424080 | CD430077 |
| BW692300 | BW691106 | CD424080 | CD430401 |
| BW692351 | BP876905 | CD424080 | CD430703 |
| BW692351 | BP889841 | CD424080 | CF434250 |
| BW692351 | BP891130 | CD424080 | CX610373 |
| BW692351 | BP891139 | CD424156 | CF487758 |
| BW692351 | BP893011 | CD424285 | CD422982 |
| BW692351 | BP894601 | CD424285 | CD424935 |
| BW692351 | BP895331 | CD424285 | CD426429 |
| BW692351 | BP897318 | CD424285 | CD426803 |
| BW692351 | BP898159 | CD424302 | BE917879 |
| BW692351 | BP898422 | CD424302 | CD428256 |
| BW692351 | BW685138 | CD424302 | CN129985 |
| BW692351 | BW685163 | CD424343 | CF487758 |
| BW692351 | BW685390 | CD424384 | CD463687 |
| BW692351 | BW685395 | CD424384 | CN124014 |
| BW692351 | BW685401 | CD424384 | CX609318 |
| BW692351 | BW685484 | CD424511 | BG556681 |
| BW692351 | BW685615 | CD424534 | CX609268 |
| BW692351 | BW685647 | CD424645 | CF487758 |
| BW692351 | BW686205 | CD424690 | CD424426 |
| BW692351 | BW686291 | CD424765 | AW678209 |
| BW692351 | BW687181 | CD424765 | CD422972 |
| BW692351 | BW687280 | CD424765 | CD424298 |
| BW692351 | BW687629 | CD424765 | CF072097 |
| BW692351 | BW688460 | CD424933 | BG739528 |
| BW692351 | BW688472 | CD424937 | BI076039 |
| BW692351 | BW688580 | CD425057 | AW283869 |
| BW692351 | BW688603 | CD425082 | CN128524 |
| BW692351 | BW688643 | CD425119 | BM317516 |
| BW692351 | BW688820 | CD425198 | CD424426 |
| BW692351 | BW689117 | CD425432 | BG649298 |
| BW692351 | BW689350 | CD425500 | CD424667 |
| BW692351 | BW689467 | CD425500 | CD424817 |
| BW692351 | BW689555 | CD425500 | CD425800 |
| BW692351 | BW689690 | CD425500 | CD426008 |

|          |          |          |          |
|----------|----------|----------|----------|
| BW692351 | BW690231 | CD425500 | CD427304 |
| BW692351 | BW690377 | CD425528 | CF487758 |
| BW692351 | BW690473 | CD425612 | BM327719 |
| BW692351 | BW690474 | CD425717 | AW565324 |
| BW692351 | BW690666 | CD425717 | BE358028 |
| BW692351 | BW690936 | CD425717 | BE593077 |
| BW692351 | BW691274 | CD425717 | CF429756 |
| BW692351 | BW691554 | CD425717 | CF432128 |
| BW692351 | BW691943 | CD425717 | CN129722 |
| BW692351 | BW692191 | CD425723 | CD424426 |
| BW692351 | BW692681 | CD425784 | CD422910 |
| BW692351 | DB716785 | CD425784 | CD422929 |
| BW692351 | DB720691 | CD425784 | CD423017 |
| BW692351 | DB721878 | CD425784 | CD423799 |
| BW692351 | DB722988 | CD425784 | CD423953 |
| BW692351 | DB723030 | CD425784 | CD424116 |
| BW692441 | DB701760 | CD425784 | CD424137 |
| BW692441 | DB704311 | CD425784 | CD424663 |
| BW692576 | BP892321 | CD425784 | CD426283 |
| BW692641 | BP885631 | CD425784 | CD426678 |
| BW692683 | BW688903 | CD425784 | CD426994 |
| BW692683 | BW690279 | CD425784 | CD427494 |
| BW692683 | BW692085 | CD425784 | CD430528 |
| BW692758 | BP882942 | CD425784 | CD461820 |
| BW692769 | BP897273 | CD425784 | CF071981 |
| BW692769 | BP897920 | CD425784 | CF433193 |
| BW692780 | DB682674 | CD425921 | BM327719 |
| BW692802 | BP876905 | CD426049 | CD461751 |
| BW692802 | BP889841 | CD426121 | CD428259 |
| BW692802 | BP891130 | CD426121 | CD428263 |
| BW692802 | BP891139 | CD426121 | CN124910 |
| BW692802 | BP893011 | CD426121 | CN131092 |
| BW692802 | BP894601 | CD426121 | CN131202 |
| BW692802 | BP895331 | CD426121 | CX611107 |
| BW692802 | BP897318 | CD426171 | BE367272 |
| BW692802 | BP898159 | CD426197 | BG239800 |
| BW692802 | BP898422 | CD426197 | BG240370 |
| BW692802 | BW685138 | CD426209 | CD424426 |
| BW692802 | BW685163 | CD426263 | AW925220 |
| BW692802 | BW685390 | CD426263 | BE125371 |
| BW692802 | BW685395 | CD426263 | BE357586 |
| BW692802 | BW685401 | CD426263 | BE357692 |
| BW692802 | BW685484 | CD426263 | BE359301 |
| BW692802 | BW685615 | CD426263 | CD463634 |
| BW692802 | BW685647 | CD426263 | CN127229 |
| BW692802 | BW686205 | CD426263 | CN129473 |
| BW692802 | BW686291 | CD426263 | CN129503 |
| BW692802 | BW687181 | CD426350 | BM318308 |
| BW692802 | BW687280 | CD426379 | CD424426 |
| BW692802 | BW687322 | CD426573 | BE917879 |
| BW692802 | BW687629 | CD426659 | BG411094 |
| BW692802 | BW688460 | CD426659 | CD424793 |

|          |          |          |          |
|----------|----------|----------|----------|
| BW692802 | BW688472 | CD426682 | CD425301 |
| BW692802 | BW688580 | CD426906 | CD423233 |
| BW692802 | BW688603 | CD427036 | CF482426 |
| BW692802 | BW688643 | CD427136 | AW565230 |
| BW692802 | BW688820 | CD427136 | AW672397 |
| BW692802 | BW689117 | CD427136 | AW672538 |
| BW692802 | BW689350 | CD427136 | BE355532 |
| BW692802 | BW689467 | CD427136 | BE355533 |
| BW692802 | BW689555 | CD427136 | BE599128 |
| BW692802 | BW689690 | CD427136 | BG412759 |
| BW692802 | BW690231 | CD427136 | BG739512 |
| BW692802 | BW690335 | CD427136 | BM325539 |
| BW692802 | BW690377 | CD427136 | CD427434 |
| BW692802 | BW690473 | CD427136 | CD462993 |
| BW692802 | BW690474 | CD427177 | BG948462 |
| BW692802 | BW690666 | CD427264 | AW287382 |
| BW692802 | BW690936 | CD427264 | AW287449 |
| BW692802 | BW691274 | CD427264 | AW563839 |
| BW692802 | BW691554 | CD427264 | AW671296 |
| BW692802 | BW691943 | CD427264 | CF428203 |
| BW692802 | BW692191 | CD427417 | BG556364 |
| BW692802 | BW692681 | CD427425 | CD431293 |
| BW692802 | DB716785 | CD427425 | CN126330 |
| BW692802 | DB720691 | CD427425 | CN129997 |
| BW692802 | DB721878 | CD427425 | CN130010 |
| BW692802 | DB722988 | CD427425 | CX610939 |
| BW692802 | DB723030 | CD427448 | CD430583 |
| BW692871 | BW692085 | CD427468 | CD424780 |
| BW692888 | DB727602 | CD427626 | BE917879 |
| BW692906 | DB682313 | CD427626 | CD428256 |
| BW692913 | DB717044 | CD427626 | CN129985 |
| DB678343 | DB706800 | CD427641 | BM323712 |
| DB678392 | DB702821 | CD427681 | CD424426 |
| DB678394 | DB720170 | CD427778 | BM327774 |
| DB678420 | DB714011 | CD427778 | BM331298 |
| DB678514 | DB697092 | CD427778 | CD463085 |
| DB678584 | DB698518 | CD427810 | CF481237 |
| DB678590 | BP904055 | CD427831 | AW671463 |
| DB678639 | BP911318 | CD427831 | BE596557 |
| DB678658 | DB721063 | CD427831 | BM318605 |
| DB678724 | DB701475 | CD427831 | CD430049 |
| DB678727 | DB679682 | CD427831 | CD431707 |
| DB678790 | BP879942 | CD427831 | CD432737 |
| DB678790 | BW688191 | CD427831 | CD462867 |
| DB678790 | BW690372 | CD427831 | CD463593 |
| DB678790 | BW691378 | CD427831 | CF427081 |
| DB678810 | DB689156 | CD427831 | CF428397 |
| DB678828 | DB709272 | CD427836 | BI074600 |
| DB678928 | DB680487 | CD427836 | CN126733 |
| DB678928 | DB708269 | CD427855 | CF483744 |
| DB678963 | DB691221 | CD427856 | CF429133 |
| DB678985 | DB717914 | CD427856 | CX611806 |

|          |          |          |          |
|----------|----------|----------|----------|
| DB679004 | DB713706 | CD427935 | BM318705 |
| DB679007 | BW690372 | CD427935 | CD430904 |
| DB679007 | BW691378 | CD427953 | AW672071 |
| DB679091 | DB679417 | CD427953 | AW672341 |
| DB679135 | DB708989 | CD427953 | BE367269 |
| DB679183 | DB683054 | CD427953 | BE595284 |
| DB679232 | DB683054 | CD427953 | BE599408 |
| DB679236 | DB717661 | CD427953 | BM318517 |
| DB679241 | DB717807 | CD427953 | BM323713 |
| DB679274 | DB714454 | CD427953 | BM324448 |
| DB679372 | DB694116 | CD427953 | BM325050 |
| DB679372 | DB698223 | CD427953 | BM325764 |
| DB679372 | DB698549 | CD427953 | CD428112 |
| DB679411 | DB689572 | CD427953 | CD428310 |
| DB679451 | DB687286 | CD427953 | CD430713 |
| DB679472 | BP879209 | CD427953 | CD432069 |
| DB679497 | DB717044 | CD427953 | CD463478 |
| DB679500 | BP881732 | CD427953 | CF427745 |
| DB679500 | DB690626 | CD427953 | CF428935 |
| DB679546 | DB712355 | CD427953 | CF428946 |
| DB679585 | DB713039 | CD427953 | CF428968 |
| DB679637 | DB680581 | CD427953 | CF430035 |
| DB679637 | DB710909 | CD427953 | CF430318 |
| DB679637 | DB721809 | CD427953 | CF430534 |
| DB679637 | DB721931 | CD427964 | CF482831 |
| DB679642 | BW691120 | CD427972 | BE596238 |
| DB679642 | DB710772 | CD427972 | BF656968 |
| DB679655 | DB711576 | CD427972 | BG101782 |
| DB679655 | DB717684 | CD427972 | BG240240 |
| DB679722 | DB719517 | CD427972 | BG240516 |
| DB679738 | DB710013 | CD427972 | BG322823 |
| DB679765 | DB706702 | CD427972 | BG357705 |
| DB679838 | BP895491 | CD427972 | BG947911 |
| DB679884 | DB678629 | CD427972 | BI076193 |
| DB679898 | DB708149 | CD427972 | BM322363 |
| DB679908 | BP908888 | CD427972 | CN125974 |
| DB679908 | BP911084 | CD427972 | CN129691 |
| DB679908 | DB688742 | CD427972 | CX608236 |
| DB679917 | DB712021 | CD427976 | CD462113 |
| DB679920 | DB709901 | CD427976 | CF489468 |
| DB679966 | DB701840 | CD428056 | BG933294 |
| DB679966 | DB711989 | CD428112 | CF428346 |
| DB679981 | DB707286 | CD428389 | CN131529 |
| DB679994 | DB694017 | CD428396 | CD462026 |
| DB680116 | DB710743 | CD428396 | CF071967 |
| DB680217 | DB717661 | CD428396 | CF074309 |
| DB680242 | BP900248 | CD428403 | CD429761 |
| DB680349 | DB706487 | CD428403 | CN125429 |
| DB680410 | DB718448 | CD428403 | CN126403 |
| DB680410 | DB718462 | CD428403 | CN127098 |
| DB680443 | DB706798 | CD428403 | CN128246 |
| DB680476 | DB715581 | CD428403 | CN129037 |

|          |          |          |          |
|----------|----------|----------|----------|
| DB680524 | DB726475 | CD428403 | CN131483 |
| DB680598 | DB692739 | CD428403 | CX609179 |
| DB680804 | DB723345 | CD428403 | CX611657 |
| DB680855 | DB688086 | CD428403 | CX612007 |
| DB680856 | DB710722 | CD428411 | CF433729 |
| DB681043 | DB712364 | CD428443 | BG412064 |
| DB681077 | DB689400 | CD428472 | CD430044 |
| DB681079 | BW689756 | CD428472 | CN131075 |
| DB681095 | DB693159 | CD428494 | CX607854 |
| DB681157 | BP886660 | CD428546 | BE917879 |
| DB681196 | BP906888 | CD428546 | CD428256 |
| DB681196 | DB688978 | CD428546 | CN129985 |
| DB681247 | DB727042 | CD428646 | AW924280 |
| DB681276 | DB692679 | CD428646 | BG947407 |
| DB681316 | DB709834 | CD428646 | CN129798 |
| DB681316 | DB712542 | CD428649 | BE367272 |
| DB681357 | DB695587 | CD428650 | CF433065 |
| DB681404 | BP881098 | CD428704 | BM318412 |
| DB681438 | DB691647 | CD428755 | CF432000 |
| DB681515 | DB683641 | CD428779 | AW286331 |
| DB681652 | DB725410 | CD428779 | BE362184 |
| DB681685 | DB710789 | CD428779 | CD431178 |
| DB681720 | DB710484 | CD428779 | CF073203 |
| DB681720 | DB712137 | CD428779 | CN126245 |
| DB681722 | DB711634 | CD428793 | CX607854 |
| DB681759 | DB691500 | CD428825 | BE592618 |
| DB681759 | DB696116 | CD428942 | CF428346 |
| DB681759 | DB699465 | CD428989 | CD427983 |
| DB681759 | DB705480 | CD428989 | CD430503 |
| DB681759 | DB711692 | CD428989 | CN125349 |
| DB681759 | DB714139 | CD428989 | CN128154 |
| DB681759 | DB722285 | CD429061 | BE596007 |
| DB681827 | DB703656 | CD429061 | BE597298 |
| DB681872 | DB684545 | CD429061 | BE597348 |
| DB681880 | DB718522 | CD429061 | BE598376 |
| DB681902 | DB710743 | CD429061 | BE600243 |
| DB681977 | DB703667 | CD429061 | BM318086 |
| DB681989 | BP908259 | CD429061 | BM329244 |
| DB682024 | DB698549 | CD429061 | BM330435 |
| DB682148 | DB710743 | CD429061 | CD432323 |
| DB682153 | BP904055 | CD429061 | CD463894 |
| DB682153 | BP904082 | CD429061 | CF428684 |
| DB682167 | DB688907 | CD429061 | CN127130 |
| DB682172 | BP900248 | CD429088 | AW672525 |
| DB682214 | DB719588 | CD429088 | BE601021 |
| DB682216 | BP900248 | CD429088 | BM326644 |
| DB682226 | DB682140 | CD429099 | CN129985 |
| DB682226 | DB690950 | CD429112 | BE917879 |
| DB682226 | DB720370 | CD429139 | AW283456 |
| DB682226 | DB724716 | CD429139 | BE364020 |
| DB682245 | BP885173 | CD429139 | BE365910 |
| DB682312 | DB688543 | CD429139 | BE595457 |



|          |          |          |          |
|----------|----------|----------|----------|
| DB682312 | DB697350 | CD429139 | BE598893 |
| DB682312 | DB702255 | CD429139 | BM325686 |
| DB682365 | DB687238 | CD429139 | CD462833 |
| DB682398 | DB726859 | CD429139 | CX607319 |
| DB682420 | BP880253 | CD429156 | AW563975 |
| DB682445 | DB688086 | CD429159 | BE917879 |
| DB682531 | DB700469 | CD429159 | CN129985 |
| DB682534 | DB703656 | CD429209 | CX606794 |
| DB682552 | DB726118 | CD429213 | AW284004 |
| DB682669 | DB709367 | CD429257 | CD431381 |
| DB682671 | DB712719 | CD429258 | CF071336 |
| DB682694 | DB697417 | CD429263 | BG240349 |
| DB682701 | DB692238 | CD429263 | CD431824 |
| DB682714 | BP885631 | CD429270 | CD429334 |
| DB682786 | DB708701 | CD429270 | CD429793 |
| DB682792 | DB706497 | CD429270 | CD429809 |
| DB682844 | DB723711 | CD429270 | CF432141 |
| DB682865 | BP892702 | CD429270 | CF432918 |
| DB682998 | DB722104 | CD429284 | BM318469 |
| DB683034 | DB687491 | CD429284 | BM322616 |
| DB683042 | DB702311 | CD429349 | CX607854 |
| DB683138 | BW686816 | CD429434 | BE600746 |
| DB683357 | DB679674 | CD429434 | CN127870 |
| DB683447 | BW686666 | CD429505 | CD431381 |
| DB683537 | DB701001 | CD429525 | CX607854 |
| DB683577 | DB706702 | CD429553 | BG158264 |
| DB683589 | DB709359 | CD429624 | CD431381 |
| DB683609 | BW687128 | CD429641 | CN131056 |
| DB683638 | DB701081 | CD429651 | CF428208 |
| DB683930 | DB706662 | CD429658 | BI140021 |
| DB684025 | DB694913 | CD429717 | AW284004 |
| DB684027 | DB699072 | CD429765 | CD428706 |
| DB684049 | DB719588 | CD429774 | CN125517 |
| DB684084 | DB689156 | CD429774 | CN130464 |
| DB684119 | DB711634 | CD429827 | AW282687 |
| DB684143 | DB726384 | CD429827 | AW565367 |
| DB684152 | BW687128 | CD429827 | BE596070 |
| DB684169 | DB693159 | CD429827 | CD429033 |
| DB684239 | BP909821 | CD429845 | CN124888 |
| DB684291 | DB723903 | CD429847 | CD463035 |
| DB684297 | BP885631 | CD429874 | AW672341 |
| DB684320 | DB698412 | CD429874 | BE367460 |
| DB684336 | DB725332 | CD429874 | BE594801 |
| DB684379 | DB701760 | CD429874 | BE595775 |
| DB684379 | DB704311 | CD429874 | BE599408 |
| DB684489 | DB688086 | CD429874 | BM318214 |
| DB684558 | BP882376 | CD429874 | BM325764 |
| DB684558 | BW689861 | CD429874 | BM330498 |
| DB684558 | DB723880 | CD429874 | CD428846 |
| DB684567 | DB725332 | CD429874 | CD428893 |
| DB684618 | DB686848 | CD429874 | CD429037 |
| DB684618 | DB693218 | CD429874 | CD429709 |

|          |          |          |          |
|----------|----------|----------|----------|
| DB684618 | DB711872 | CD429874 | CD429754 |
| DB684618 | DB718350 | CD429874 | CD430181 |
| DB684618 | DB719981 | CD429874 | CD431484 |
| DB684621 | DB702024 | CD429874 | CD432312 |
| DB684649 | DB723007 | CD429874 | CD462892 |
| DB684726 | DB705089 | CD429874 | CD462920 |
| DB684745 | DB684490 | CD429874 | CD463275 |
| DB684932 | DB711225 | CD429874 | CD463688 |
| DB685169 | DB726844 | CD429874 | CD463893 |
| DB685171 | DB711551 | CD429874 | CF427017 |
| DB685175 | DB716167 | CD429874 | CF427745 |
| DB685264 | DB689874 | CD429874 | CF428861 |
| DB685264 | DB697498 | CD429874 | CF428935 |
| DB685264 | DB703895 | CD429874 | CF428968 |
| DB685282 | DB702821 | CD429874 | CF429307 |
| DB685368 | DB685319 | CD429874 | CF430278 |
| DB685368 | DB689166 | CD429874 | CF430398 |
| DB685542 | DB710743 | CD429874 | CF430534 |
| DB685550 | DB710789 | CD429917 | CD429699 |
| DB685577 | DB678594 | CD429958 | BG412755 |
| DB685577 | DB713039 | CD430029 | BE355073 |
| DB685577 | DB714188 | CD430029 | CD429113 |
| DB685689 | DB678843 | CD430029 | CD429266 |
| DB685689 | DB682395 | CD430029 | CD430268 |
| DB685777 | DB725862 | CD430029 | CD463653 |
| DB685903 | DB679674 | CD430029 | CF428349 |
| DB685920 | BP906405 | CD430029 | CF431908 |
| DB685920 | BP911400 | CD430029 | CF432558 |
| DB685922 | DB698412 | CD430029 | CF433714 |
| DB686033 | DB681428 | CD430029 | CF434354 |
| DB686076 | BP885631 | CD430029 | CN127544 |
| DB686095 | BP887078 | CD430066 | BE365066 |
| DB686095 | DB699842 | CD430066 | BE365067 |
| DB686095 | DB726820 | CD430098 | BE594472 |
| DB686140 | BW686666 | CD430098 | CD428231 |
| DB686149 | DB681828 | CD430098 | CN124909 |
| DB686149 | DB689874 | CD430098 | CN127355 |
| DB686149 | DB692405 | CD430098 | CN130453 |
| DB686149 | DB697868 | CD430098 | CN130492 |
| DB686149 | DB708523 | CD430098 | CX611119 |
| DB686161 | DB695492 | CD430116 | BI075803 |
| DB686177 | DB686848 | CD430116 | BI140056 |
| DB686177 | DB693218 | CD430116 | CF429244 |
| DB686177 | DB711872 | CD430119 | CN130580 |
| DB686177 | DB718350 | CD430143 | BM322472 |
| DB686177 | DB719144 | CD430192 | AW563975 |
| DB686177 | DB719981 | CD430230 | CF429407 |
| DB686316 | DB697556 | CD430231 | BE361615 |
| DB686319 | DB710820 | CD430257 | AW678642 |
| DB686323 | DB714188 | CD430257 | BE592686 |
| DB686373 | DB681769 | CD430259 | BG412209 |
| DB686373 | DB685987 | CD430259 | BM324522 |

|          |          |          |          |
|----------|----------|----------|----------|
| DB686373 | DB692594 | CD430259 | CF074004 |
| DB686373 | DB694195 | CD430272 | AW922074 |
| DB686373 | DB702370 | CD430272 | BE918085 |
| DB686373 | DB711403 | CD430272 | BG556170 |
| DB686373 | DB714266 | CD430272 | BG739538 |
| DB686373 | DB717393 | CD430272 | BM323421 |
| DB686373 | DB720005 | CD430272 | CD427848 |
| DB686373 | DB722287 | CD430272 | CD432330 |
| DB686373 | DB723170 | CD430272 | CD462417 |
| DB686395 | BP909902 | CD430272 | CF427759 |
| DB686424 | DB685990 | CD430272 | CF482380 |
| DB686424 | DB715397 | CD430272 | CF482399 |
| DB686428 | DB717313 | CD430272 | CF487601 |
| DB686487 | DB683872 | CD430272 | CF488395 |
| DB686487 | DB699629 | CD430272 | CN128462 |
| DB686487 | DB713156 | CD430272 | CN130781 |
| DB686499 | DB725332 | CD430272 | CN131247 |
| DB686544 | BP898994 | CD430272 | CX606205 |
| DB686546 | DB702511 | CD430272 | CX607048 |
| DB686664 | DB701760 | CD430272 | CX607051 |
| DB686664 | DB704311 | CD430272 | CX607243 |
| DB686684 | DB688086 | CD430272 | CX607264 |
| DB686702 | DB688907 | CD430272 | CX607616 |
| DB686712 | DB689400 | CD430272 | CX607958 |
| DB686734 | DB690338 | CD430272 | CX608261 |
| DB686762 | BP910010 | CD430272 | CX608762 |
| DB686771 | DB724787 | CD430272 | CX610595 |
| DB686831 | DB717313 | CD430285 | AW286534 |
| DB686858 | DB680885 | CD430285 | BI098668 |
| DB686949 | DB714138 | CD430285 | BI099368 |
| DB687034 | BW687073 | CD430285 | CF487133 |
| DB687114 | BP887078 | CD430347 | CF428291 |
| DB687114 | DB699842 | CD430418 | BM318412 |
| DB687114 | DB726820 | CD430475 | BE360869 |
| DB687135 | DB679674 | CD430493 | AW677718 |
| DB687136 | BP882376 | CD430493 | BG241292 |
| DB687136 | DB723880 | CD430493 | BG556704 |
| DB687186 | DB687477 | CD430493 | CF427245 |
| DB687219 | DB719413 | CD430493 | CF428389 |
| DB687238 | DB710820 | CD430493 | CF429332 |
| DB687244 | BP887078 | CD430493 | CF487985 |
| DB687244 | DB699842 | CD430493 | CN129211 |
| DB687244 | DB726820 | CD430502 | BF656672 |
| DB687284 | BP896273 | CD430502 | BM326101 |
| DB687284 | BP900201 | CD430502 | CD430635 |
| DB687378 | DB713201 | CD430502 | CN125165 |
| DB687378 | DB717668 | CD430523 | CF429057 |
| DB687378 | DB726411 | CD430537 | CD429599 |
| DB687444 | DB718448 | CD430545 | BE597281 |
| DB687444 | DB718462 | CD430545 | BF656672 |
| DB687549 | DB683451 | CD430545 | BM326101 |
| DB687570 | DB698549 | CD430545 | CD430635 |

|          |          |          |          |
|----------|----------|----------|----------|
| DB687817 | BP881732 | CD430545 | CN125165 |
| DB687817 | DB727375 | CD430638 | BE918102 |
| DB687824 | DB724893 | CD430638 | BE918239 |
| DB687858 | DB712355 | CD430638 | BM324752 |
| DB687932 | DB695083 | CD430638 | CD462488 |
| DB687932 | DB700469 | CD430638 | CD464091 |
| DB687935 | BP898994 | CD430638 | CN129646 |
| DB687945 | BP902435 | CD430685 | CF070729 |
| DB687965 | DB722308 | CD430717 | CF429258 |
| DB687979 | DB725272 | CD430723 | CD428725 |
| DB688002 | BP902420 | CD430723 | CF432429 |
| DB688002 | BP902867 | CD430723 | CF433398 |
| DB688187 | DB682654 | CD430723 | CN128980 |
| DB688214 | DB718257 | CD430741 | CD432213 |
| DB688237 | DB708149 | CD430784 | CF072007 |
| DB688242 | DB725476 | CD430833 | CF486054 |
| DB688314 | DB725332 | CD430879 | AW564083 |
| DB688365 | DB718462 | CD430879 | BM323975 |
| DB688400 | DB714188 | CD430911 | CF428063 |
| DB688403 | BP910050 | CD431003 | AW677804 |
| DB688421 | DB725332 | CD431003 | AW677984 |
| DB688429 | DB710743 | CD431003 | AW678289 |
| DB688480 | DB695990 | CD431003 | AW679849 |
| DB688554 | BP877585 | CD431003 | AW680049 |
| DB688554 | BP878510 | CD431003 | AW680117 |
| DB688554 | BP880312 | CD431003 | AW744782 |
| DB688554 | BP880970 | CD431003 | AW744818 |
| DB688554 | BP881573 | CD431003 | AW922382 |
| DB688554 | BP882110 | CD431003 | BE357394 |
| DB688554 | BP882208 | CD431003 | BE362330 |
| DB688554 | BP886380 | CD431003 | BE363413 |
| DB688554 | BP887383 | CD431003 | BE363756 |
| DB688554 | BP887894 | CD431003 | BE366645 |
| DB688554 | BP888149 | CD431003 | BE592210 |
| DB688554 | BP899884 | CD431003 | BE593145 |
| DB688554 | BP910576 | CD431003 | BE596025 |
| DB688554 | BW689225 | CD431003 | BE917797 |
| DB688554 | BW692555 | CD431003 | BG487672 |
| DB688554 | DB680908 | CD431003 | BG933266 |
| DB688554 | DB687975 | CD431003 | CD427915 |
| DB688554 | DB692793 | CD431003 | CD428008 |
| DB688554 | DB695801 | CD431003 | CD430320 |
| DB688554 | DB698060 | CD431003 | CD431143 |
| DB688554 | DB699972 | CD431003 | CD431813 |
| DB688554 | DB704814 | CD431003 | CD462897 |
| DB688554 | DB704960 | CD431003 | CD463543 |
| DB688554 | DB708451 | CD431003 | CF071200 |
| DB688554 | DB714572 | CD431003 | CN124167 |
| DB688617 | DB727325 | CD431029 | AW287664 |
| DB688665 | DB711571 | CD431044 | CD428706 |
| DB688684 | BP882618 | CD431044 | CD431881 |
| DB688713 | DB723391 | CD431044 | CD432176 |

|          |          |          |          |
|----------|----------|----------|----------|
| DB688717 | DB710028 | CD431044 | CD432342 |
| DB688755 | DB718462 | CD431044 | CD462719 |
| DB688758 | BP880808 | CD431047 | CD428962 |
| DB688787 | BP891796 | CD431047 | CF429074 |
| DB688787 | DB680638 | CD431055 | BG241193 |
| DB688889 | DB694682 | CD431104 | CN124789 |
| DB688903 | DB681954 | CD431200 | BE361138 |
| DB688913 | DB697379 | CD431236 | CD432815 |
| DB688979 | BP899641 | CD431236 | CF071989 |
| DB689031 | DB718209 | CD431236 | CN126183 |
| DB689031 | DB720735 | CD431236 | CN126398 |
| DB689056 | BP879209 | CD431285 | CD462706 |
| DB689056 | BP880563 | CD431317 | BE917879 |
| DB689071 | DB712431 | CD431317 | CD428256 |
| DB689221 | DB714386 | CD431317 | CN129985 |
| DB689236 | BP900193 | CD431342 | BE595870 |
| DB689236 | DB683901 | CD431359 | CN128524 |
| DB689269 | DB727664 | CD431376 | CN128617 |
| DB689345 | DB695990 | CD431379 | AW922211 |
| DB689533 | DB679674 | CD431379 | AW923308 |
| DB689547 | DB679388 | CD431379 | CN126014 |
| DB689562 | BP908259 | CD431379 | CN127688 |
| DB689565 | DB697379 | CD431379 | CN130194 |
| DB689626 | BW688690 | CD431406 | CN128524 |
| DB689659 | BW684972 | CD431410 | BE355536 |
| DB689697 | DB710743 | CD431410 | BG557308 |
| DB689761 | DB718448 | CD431415 | BM318308 |
| DB689761 | DB718462 | CD431418 | BI076132 |
| DB689782 | DB705581 | CD431441 | BE595801 |
| DB689815 | BP910050 | CD431441 | BE600810 |
| DB689815 | DB690950 | CD431461 | CD430454 |
| DB689852 | DB684991 | CD431466 | CF481415 |
| DB689867 | BP897446 | CD431551 | BI140453 |
| DB689867 | DB702168 | CD431595 | BM323415 |
| DB689916 | BP896773 | CD431598 | BE917879 |
| DB689916 | DB707036 | CD431620 | CD432507 |
| DB689935 | DB724242 | CD431620 | CD463311 |
| DB689948 | DB710743 | CD431620 | CD463500 |
| DB690100 | DB685871 | CD431620 | CF433698 |
| DB690100 | DB691914 | CD431766 | BG463927 |
| DB690100 | DB695587 | CD431769 | AW678443 |
| DB690156 | DB710820 | CD431778 | CX607854 |
| DB690188 | DB679674 | CD431795 | CX607854 |
| DB690210 | DB719486 | CD431853 | CD464123 |
| DB690210 | DB727542 | CD431859 | BG322712 |
| DB690243 | DB708818 | CD431859 | CF430163 |
| DB690333 | DB693159 | CD431893 | AW678098 |
| DB690389 | DB679674 | CD431893 | AW925113 |
| DB690396 | DB682940 | CD431893 | BE355027 |
| DB690396 | DB683964 | CD431893 | BE365299 |
| DB690396 | DB710065 | CD431893 | BE599471 |
| DB690396 | DB717884 | CD431893 | BE918132 |

|          |          |          |          |
|----------|----------|----------|----------|
| DB690422 | DB697379 | CD431893 | BF657234 |
| DB690427 | DB725332 | CD431893 | BG240413 |
| DB690450 | DB690585 | CD431893 | BM323607 |
| DB690497 | DB689320 | CD431893 | BM324934 |
| DB690515 | DB700343 | CD431893 | BM326168 |
| DB690515 | DB708474 | CD431893 | CD428473 |
| DB690529 | DB702361 | CD431893 | CD428618 |
| DB690529 | DB704732 | CD431893 | CD429261 |
| DB690547 | DB678355 | CD431893 | CD429296 |
| DB690682 | DB678355 | CD431893 | CD430883 |
| DB690756 | BP900248 | CD431893 | CD430921 |
| DB690797 | DB680885 | CD431893 | CD431746 |
| DB690862 | BP892940 | CD431893 | CD462582 |
| DB690923 | DB678924 | CD431893 | CD463305 |
| DB690923 | DB683148 | CD431893 | CD463311 |
| DB690923 | DB690741 | CD431893 | CD463500 |
| DB690987 | DB725272 | CD431893 | CD463819 |
| DB691071 | DB686588 | CD431893 | CN131378 |
| DB691100 | DB694116 | CD431893 | CX612138 |
| DB691100 | DB698223 | CD431927 | CD429110 |
| DB691314 | BP900248 | CD431927 | CD432049 |
| DB691320 | BP897105 | CD431932 | BE358288 |
| DB691320 | DB686495 | CD432010 | BG411301 |
| DB691320 | DB692018 | CD432010 | CF433228 |
| DB691320 | DB696090 | CD432010 | CX610586 |
| DB691320 | DB709151 | CD432018 | CD430439 |
| DB691320 | DB712468 | CD432018 | CF480239 |
| DB691426 | DB695990 | CD432018 | CF489983 |
| DB691460 | DB700962 | CD432021 | CD429661 |
| DB691470 | DB724365 | CD432021 | CD430236 |
| DB691550 | BP900248 | CD432021 | CD432003 |
| DB691608 | DB705485 | CD432021 | CF427908 |
| DB691643 | DB707945 | CD432021 | CF433698 |
| DB691654 | DB710743 | CD432021 | CF433899 |
| DB691750 | DB682657 | CD432029 | CX607789 |
| DB691774 | DB712021 | CD432035 | BE595051 |
| DB691803 | DB686625 | CD432035 | BG948489 |
| DB691933 | DB722969 | CD432035 | CD429946 |
| DB691952 | DB691221 | CD432035 | CF428556 |
| DB691955 | DB686349 | CD432035 | CF480217 |
| DB691955 | DB724952 | CD432035 | CN128595 |
| DB691989 | DB723227 | CD432069 | CF428346 |
| DB692012 | DB685968 | CD432074 | CD431036 |
| DB692087 | BP879209 | CD432169 | BE362773 |
| DB692087 | BP880563 | CD432171 | CX607242 |
| DB692123 | DB689320 | CD432206 | CD429253 |
| DB692214 | DB678507 | CD432206 | CX611977 |
| DB692214 | DB710320 | CD432208 | CD431381 |
| DB692332 | BP880541 | CD432239 | AW678665 |
| DB692332 | DB696116 | CD432242 | BG557365 |
| DB692332 | DB705480 | CD432253 | AW672373 |
| DB692332 | DB711692 | CD432253 | CD463486 |

|          |          |          |          |
|----------|----------|----------|----------|
| DB692332 | DB714139 | CD432335 | CF429100 |
| DB692332 | DB715099 | CD432384 | BE360663 |
| DB692370 | DB701278 | CD432384 | CD430536 |
| DB692370 | DB711796 | CD432384 | CN130464 |
| DB692383 | DB720808 | CD432384 | CX611813 |
| DB692489 | DB705485 | CD432404 | AW671239 |
| DB692510 | DB723516 | CD432441 | BG411757 |
| DB692550 | DB693079 | CD432445 | CN128551 |
| DB692587 | DB685588 | CD432504 | CD431381 |
| DB692587 | DB691911 | CD432511 | AW672376 |
| DB692595 | DB718209 | CD432511 | AW745726 |
| DB692595 | DB720735 | CD432511 | BE355073 |
| DB692645 | DB716368 | CD432511 | BE595495 |
| DB692707 | DB708157 | CD432511 | BI099033 |
| DB692761 | DB678507 | CD432511 | CD429113 |
| DB692761 | DB710320 | CD432511 | CD432679 |
| DB692791 | DB683451 | CD432511 | CD463000 |
| DB692812 | DB714624 | CD432511 | CD463321 |
| DB692827 | DB698223 | CD432511 | CF427132 |
| DB692850 | DB701081 | CD432511 | CF427144 |
| DB692856 | DB679674 | CD432511 | CF428934 |
| DB692857 | DB689800 | CD432511 | CF431898 |
| DB692862 | DB680962 | CD432511 | CF432573 |
| DB692920 | DB711225 | CD432511 | CF432585 |
| DB692945 | DB693159 | CD432511 | CF432689 |
| DB692961 | BP900248 | CD432511 | CF433189 |
| DB693020 | DB705485 | CD432511 | CN127544 |
| DB693044 | DB716368 | CD432511 | CN131039 |
| DB693072 | DB679674 | CD432541 | CN128551 |
| DB693141 | BP881098 | CD432568 | BE358112 |
| DB693305 | BW685319 | CD432568 | BF657188 |
| DB693312 | DB712355 | CD432568 | BG241190 |
| DB693319 | DB716368 | CD432568 | BG487497 |
| DB693370 | DB714188 | CD432568 | CD429113 |
| DB693387 | DB724242 | CD432568 | CD463329 |
| DB693400 | DB689400 | CD432568 | CF427143 |
| DB693407 | DB713039 | CD432568 | CF427911 |
| DB693420 | BW690040 | CD432568 | CF428791 |
| DB693437 | BP892702 | CD432568 | CF429424 |
| DB693440 | BP885631 | CD432568 | CF431472 |
| DB693492 | DB682123 | CD432568 | CF432585 |
| DB693492 | DB701248 | CD432568 | CF432688 |
| DB693492 | DB714640 | CD432568 | CF432750 |
| DB693492 | DB718935 | CD432568 | CF434354 |
| DB693516 | DB683434 | CD432568 | CF434386 |
| DB693516 | DB688767 | CD432568 | CN125682 |
| DB693534 | DB698223 | CD432568 | CN128603 |
| DB693534 | DB698549 | CD432578 | CD428431 |
| DB693620 | DB692671 | CD432578 | CD463453 |
| DB693681 | DB721077 | CD432619 | BM330371 |
| DB693683 | DB712355 | CD432689 | AW678443 |
| DB693719 | DB709702 | CD432695 | AW287664 |

|          |          |          |          |
|----------|----------|----------|----------|
| DB693749 | DB726321 | CD432708 | CD431381 |
| DB693843 | DB708393 | CD432720 | CD426444 |
| DB693870 | DB682164 | CD432720 | CN127890 |
| DB693891 | DB717329 | CD432735 | CN127555 |
| DB693936 | BP885173 | CD432770 | BE364232 |
| DB693999 | DB710772 | CD432780 | BG556735 |
| DB694187 | DB701592 | CD432819 | BE595200 |
| DB694187 | DB724310 | CD432819 | BE595796 |
| DB694220 | DB714188 | CD432819 | BG054389 |
| DB694228 | DB723391 | CD432819 | BG241095 |
| DB694233 | BW691120 | CD432819 | CX607964 |
| DB694235 | BP900789 | CD432819 | CX611606 |
| DB694267 | DB710147 | CD461655 | CF427654 |
| DB694280 | DB707945 | CD461655 | CN126426 |
| DB694283 | DB685868 | CD461776 | CD426064 |
| DB694283 | DB694269 | CD461776 | CD426331 |
| DB694283 | DB703668 | CD461776 | CD461751 |
| DB694359 | DB687477 | CD461792 | AW672397 |
| DB694400 | DB725497 | CD461792 | BG556867 |
| DB694432 | BP897648 | CD461792 | CD424322 |
| DB694454 | DB681278 | CD461792 | CD426285 |
| DB694454 | DB681828 | CD461792 | CF432736 |
| DB694454 | DB682646 | CD461903 | CD425245 |
| DB694454 | DB689874 | CD461903 | CD426025 |
| DB694454 | DB692405 | CD461903 | CF485750 |
| DB694454 | DB695422 | CD461903 | CN124628 |
| DB694454 | DB697868 | CD461904 | CD424013 |
| DB694454 | DB699380 | CD461904 | CD426331 |
| DB694454 | DB701621 | CD462106 | CN128554 |
| DB694454 | DB703454 | CD462106 | CX609337 |
| DB694454 | DB708523 | CD462138 | BI075254 |
| DB694454 | DB709100 | CD462180 | BE355060 |
| DB694454 | DB713880 | CD462198 | BI098281 |
| DB694454 | DB720065 | CD462198 | CD424613 |
| DB694595 | DB708149 | CD462257 | BE355149 |
| DB694665 | DB714188 | CD462333 | CD423011 |
| DB694688 | DB710013 | CD462333 | CD424662 |
| DB694847 | DB685868 | CD462333 | CD426272 |
| DB694847 | DB694269 | CD462333 | CD427095 |
| DB694847 | DB699639 | CD462375 | CD462373 |
| DB694847 | DB703668 | CD462392 | BM326146 |
| DB694854 | BW691120 | CD462392 | CD431476 |
| DB694854 | DB710772 | CD462443 | BE361852 |
| DB694857 | DB692906 | CD462443 | BM326146 |
| DB694865 | DB710743 | CD462443 | BM331450 |
| DB694867 | DB698549 | CD462443 | CD431476 |
| DB694889 | BP908251 | CD462450 | AW924171 |
| DB694889 | DB699440 | CD462450 | BG464250 |
| DB694898 | DB718448 | CD462455 | CX607733 |
| DB694963 | DB689572 | CD462489 | BE358055 |
| DB695029 | DB684657 | CD462489 | CD429304 |
| DB695029 | DB690893 | CD462560 | CX607854 |



|          |          |          |          |
|----------|----------|----------|----------|
| DB695029 | DB701202 | CD462588 | BG933559 |
| DB695062 | DB684991 | CD462588 | CF434230 |
| DB695066 | DB678810 | CD462618 | CD432213 |
| DB695066 | DB689156 | CD462621 | CN124542 |
| DB695066 | DB699022 | CD462697 | CX610209 |
| DB695108 | DB721951 | CD462787 | AW283072 |
| DB695112 | BW689861 | CD462787 | BE360894 |
| DB695120 | DB689572 | CD462787 | BE365935 |
| DB695159 | DB682657 | CD462787 | BG049146 |
| DB695160 | DB694141 | CD462787 | BG049422 |
| DB695177 | DB695990 | CD462787 | BM317453 |
| DB695253 | BP895491 | CD462787 | BM318520 |
| DB695272 | DB708170 | CD462787 | BM327137 |
| DB695400 | DB700450 | CD462787 | BM331169 |
| DB695454 | DB720170 | CD462787 | CD429191 |
| DB695784 | DB684490 | CD462787 | CD429923 |
| DB695789 | DB686108 | CD462787 | CD430658 |
| DB695789 | DB697136 | CD462787 | CD430949 |
| DB695789 | DB706276 | CD462787 | CD462896 |
| DB695800 | DB720298 | CD462787 | CF071083 |
| DB695880 | DB724310 | CD462787 | CF071201 |
| DB695981 | DB719588 | CD462787 | CF071563 |
| DB696043 | DB707996 | CD462787 | CF071818 |
| DB696102 | DB695647 | CD462787 | CF072460 |
| DB696215 | DB721547 | CD462787 | CF072540 |
| DB696377 | DB709367 | CD462787 | CF073267 |
| DB696379 | BW692295 | CD462787 | CF427376 |
| DB696451 | DB679721 | CD462787 | CF427551 |
| DB696451 | DB692904 | CD462787 | CF427581 |
| DB696504 | DB687477 | CD462787 | CF428837 |
| DB696614 | DB725647 | CD462787 | CF429190 |
| DB696660 | DB717217 | CD462787 | CF430094 |
| DB696660 | DB721515 | CD462787 | EB725038 |
| DB696660 | DB721985 | CD462787 | EB725164 |
| DB696669 | DB681278 | CD462809 | BF656761 |
| DB696669 | DB681828 | CD462809 | BI075593 |
| DB696669 | DB682646 | CD462809 | CD424785 |
| DB696669 | DB683844 | CD462809 | CF070858 |
| DB696669 | DB689874 | CD462809 | CF071099 |
| DB696669 | DB692405 | CD462809 | CF071451 |
| DB696669 | DB697868 | CD462809 | CF071754 |
| DB696669 | DB703454 | CD462809 | CF072516 |
| DB696669 | DB703895 | CD462809 | CF072630 |
| DB696669 | DB708523 | CD462809 | CF073006 |
| DB696669 | DB709100 | CD462809 | CF073440 |
| DB696669 | DB713880 | CD462809 | CF073897 |
| DB696669 | DB720065 | CD462809 | CF074228 |
| DB696761 | DB725476 | CD462809 | CN130112 |
| DB696765 | DB719449 | CD462828 | CD428260 |
| DB696774 | BP897648 | CD462828 | CD431397 |
| DB696958 | DB684490 | CD462836 | AW671589 |
| DB696968 | DB684484 | CD462836 | CD431707 |

|          |          |          |          |
|----------|----------|----------|----------|
| DB697001 | DB679674 | CD462836 | CF429226 |
| DB697016 | DB726442 | CD462844 | BE358842 |
| DB697060 | BP910050 | CD462844 | BE360005 |
| DB697060 | DB682288 | CD462844 | CD427516 |
| DB697060 | DB690950 | CD462844 | CF071451 |
| DB697099 | DB720749 | CD462844 | CF071734 |
| DB697408 | DB719178 | CD462844 | CF072036 |
| DB697459 | DB679502 | CD462844 | CF072635 |
| DB697459 | DB683540 | CD462844 | CF073665 |
| DB697631 | DB698223 | CD462844 | CF073897 |
| DB697649 | DB680829 | CD462844 | CF430595 |
| DB697675 | BP877566 | CD462856 | CF431058 |
| DB697769 | DB723477 | CD462856 | CF434168 |
| DB697844 | DB694913 | CD462884 | CD428503 |
| DB697883 | DB699072 | CD462890 | CD428312 |
| DB698020 | DB687664 | CD462931 | CX607854 |
| DB698020 | DB688461 | CD462979 | CD430065 |
| DB698022 | BP885203 | CD462979 | CF431078 |
| DB698022 | BP901954 | CD462996 | CN129985 |
| DB698022 | DB709528 | CD463002 | AW563619 |
| DB698125 | DB680581 | CD463002 | CD428666 |
| DB698125 | DB721809 | CD463009 | AW672376 |
| DB698187 | DB725272 | CD463009 | BE358112 |
| DB698216 | DB711225 | CD463009 | BE360501 |
| DB698337 | DB685319 | CD463009 | BF657188 |
| DB698337 | DB689166 | CD463009 | BG241190 |
| DB698378 | DB726971 | CD463009 | BG487497 |
| DB698499 | DB689640 | CD463009 | BM325719 |
| DB698664 | DB723879 | CD463009 | CD428658 |
| DB698727 | DB706513 | CD463009 | CD429113 |
| DB698820 | BP879692 | CD463009 | CD463329 |
| DB698820 | DB679925 | CD463009 | CD463506 |
| DB698820 | DB689937 | CD463009 | CF427143 |
| DB698858 | DB698223 | CD463009 | CF427911 |
| DB699084 | DB701852 | CD463009 | CF427937 |
| DB699092 | DB724242 | CD463009 | CF428791 |
| DB699101 | DB680913 | CD463009 | CF429424 |
| DB699101 | DB713383 | CD463009 | CF430149 |
| DB699182 | DB684999 | CD463009 | CF430665 |
| DB699182 | DB697195 | CD463009 | CF431472 |
| DB699331 | DB710743 | CD463009 | CF431898 |
| DB699367 | DB712719 | CD463009 | CF432549 |
| DB699401 | DB714386 | CD463009 | CF432558 |
| DB699432 | DB711225 | CD463009 | CF432585 |
| DB699446 | DB692032 | CD463009 | CF432688 |
| DB699546 | DB724618 | CD463009 | CF432750 |
| DB699639 | DB685868 | CD463009 | CF434354 |
| DB699639 | DB703668 | CD463009 | CF434386 |
| DB699740 | DB717313 | CD463009 | CN125682 |
| DB699760 | BP882376 | CD463009 | CN127544 |
| DB699760 | DB723880 | CD463009 | CN128603 |
| DB699766 | DB680509 | CD463023 | BG355583 |

|          |          |          |          |
|----------|----------|----------|----------|
| DB699766 | DB713155 | CD463061 | CD428958 |
| DB699850 | DB722939 | CD463061 | CX608812 |
| DB699887 | DB713706 | CD463069 | BE596121 |
| DB699992 | DB713156 | CD463069 | BM325764 |
| DB699992 | DB722132 | CD463069 | CD428893 |
| DB700101 | DB684991 | CD463069 | CD430181 |
| DB700164 | BW692343 | CD463069 | CD432312 |
| DB700164 | DB704987 | CD463069 | CD432405 |
| DB700294 | DB692931 | CD463069 | CD432500 |
| DB700358 | DB693159 | CD463069 | CD462892 |
| DB700381 | BP904082 | CD463069 | CD462920 |
| DB700386 | BP900789 | CD463069 | CD463478 |
| DB700402 | DB714386 | CD463069 | CF427783 |
| DB700512 | DB706513 | CD463069 | CF428756 |
| DB700619 | DB711644 | CD463069 | CF430534 |
| DB700638 | BP900789 | CD463069 | CF430543 |
| DB700675 | DB725425 | CD463107 | AW282687 |
| DB700681 | BP898164 | CD463107 | AW565367 |
| DB700681 | BP900552 | CD463107 | BE596070 |
| DB700681 | BP900584 | CD463107 | CD429033 |
| DB700681 | BP906159 | CD463107 | CD463553 |
| DB700681 | BP909620 | CD463112 | CX607854 |
| DB700690 | BP905462 | CD463135 | AW747292 |
| DB700690 | DB684206 | CD463135 | AW924528 |
| DB700734 | DB724242 | CD463135 | BE592530 |
| DB700743 | DB709359 | CD463135 | BE595417 |
| DB700856 | DB699502 | CD463135 | BE597606 |
| DB700900 | DB702821 | CD463135 | BE600850 |
| DB700907 | DB718209 | CD463135 | CD425846 |
| DB700907 | DB720735 | CD463135 | CF426920 |
| DB700942 | BW690636 | CD463135 | CF427280 |
| DB700942 | DB709273 | CD463135 | CF427607 |
| DB700952 | DB687844 | CD463135 | CF428408 |
| DB700967 | DB726183 | CD463135 | CF429970 |
| DB701123 | DB725497 | CD463135 | CF429982 |
| DB701190 | DB678355 | CD463135 | CF430356 |
| DB701190 | DB682542 | CD463135 | CN131089 |
| DB701197 | DB711225 | CD463135 | CX608238 |
| DB701203 | DB690409 | CD463144 | CF486084 |
| DB701286 | DB714011 | CD463173 | CD428958 |
| DB701309 | DB706702 | CD463173 | CX608812 |
| DB701311 | DB718448 | CD463173 | CX611821 |
| DB701369 | DB710904 | CD463176 | AW563355 |
| DB701369 | DB711576 | CD463176 | BE600040 |
| DB701369 | DB717684 | CD463176 | BF177226 |
| DB701390 | DB723187 | CD463176 | CF481350 |
| DB701410 | DB698412 | CD463176 | CF482267 |
| DB701422 | DB724618 | CD463176 | CF486643 |
| DB701468 | DB688086 | CD463176 | CN125673 |
| DB701495 | DB710743 | CD463176 | CN127752 |
| DB701564 | DB687197 | CD463176 | CN130017 |
| DB701564 | DB719388 | CD463176 | CN130147 |

|          |          |          |          |
|----------|----------|----------|----------|
| DB701584 | DB699072 | CD463176 | CX606394 |
| DB701684 | DB681567 | CD463176 | CX608105 |
| DB701737 | BP900789 | CD463176 | CX610433 |
| DB701763 | BP909478 | CD463226 | CF429775 |
| DB701763 | BP911015 | CD463250 | AW678310 |
| DB701763 | DB708651 | CD463309 | BE362054 |
| DB701790 | DB681282 | CD463309 | CF428243 |
| DB701845 | DB720808 | CD463309 | CF489239 |
| DB701905 | DB681158 | CD463318 | AW678310 |
| DB701983 | DB698412 | CD463325 | CN131187 |
| DB702039 | DB710789 | CD463328 | CD463035 |
| DB702045 | DB727320 | CD463407 | AW563227 |
| DB702103 | DB717513 | CD463407 | BM318613 |
| DB702151 | BP884763 | CD463407 | CD428861 |
| DB702168 | DB727664 | CD463407 | CD429739 |
| DB702292 | BP882376 | CD463407 | CF431306 |
| DB702292 | DB723880 | CD463407 | CF433322 |
| DB702302 | DB708393 | CD463428 | CX610209 |
| DB702375 | DB713933 | CD463499 | BM323956 |
| DB702448 | DB686525 | CD463511 | BE367304 |
| DB702518 | DB688628 | CD463511 | BE598664 |
| DB702518 | DB725299 | CD463511 | CF433647 |
| DB702590 | DB703656 | CD463511 | CN127050 |
| DB702641 | DB689320 | CD463511 | CX610631 |
| DB702643 | DB686108 | CD463560 | CF072007 |
| DB702643 | DB697136 | CD463590 | CF481992 |
| DB702643 | DB706276 | CD463592 | CF428346 |
| DB702650 | DB710743 | CD463604 | BI141531 |
| DB702716 | DB726384 | CD463619 | CF480414 |
| DB702792 | DB720170 | CD463624 | CF433729 |
| DB702866 | DB687791 | CD463625 | AW680753 |
| DB702883 | DB691221 | CD463625 | BG357055 |
| DB702893 | DB679674 | CD463625 | CF480939 |
| DB702942 | DB687732 | CD463644 | CD463472 |
| DB702942 | DB709901 | CD463648 | BE592926 |
| DB702942 | DB717342 | CD463648 | CN125329 |
| DB702983 | DB706800 | CD463648 | CX609457 |
| DB703056 | BW685102 | CD463675 | CX607854 |
| DB703056 | BW686698 | CD463730 | BE599250 |
| DB703085 | DB703161 | CD463787 | AW678044 |
| DB703122 | BP887078 | CD463787 | AW678692 |
| DB703165 | DB679944 | CD463787 | AW678764 |
| DB703197 | BW691682 | CD463787 | AW680648 |
| DB703245 | DB725095 | CD463787 | AW680824 |
| DB703300 | DB714386 | CD463787 | AW681020 |
| DB703409 | DB717914 | CD463787 | AW745504 |
| DB703437 | BW692343 | CD463787 | AW746620 |
| DB703437 | DB704987 | CD463787 | AW924077 |
| DB703465 | DB721275 | CD463787 | AW924213 |
| DB703494 | DB720170 | CD463787 | AW924761 |
| DB703496 | DB705642 | CD463787 | BE357884 |
| DB703496 | DB709102 | CD463787 | BE365026 |

|          |          |          |          |
|----------|----------|----------|----------|
| DB703576 | BP879942 | CD463787 | BE366818 |
| DB703576 | BW688191 | CD463787 | BE592616 |
| DB703576 | BW690372 | CD463787 | BE595225 |
| DB703576 | BW691378 | CD463787 | BE600203 |
| DB703616 | DB700450 | CD463787 | BG933045 |
| DB703635 | DB712355 | CD463787 | BG933120 |
| DB703712 | DB708157 | CD463787 | CD426006 |
| DB703749 | DB725545 | CD463787 | CD426831 |
| DB703833 | DB714830 | CD463798 | CF433057 |
| DB703834 | DB710904 | CD463813 | AW563514 |
| DB703880 | DB682640 | CD463813 | AW563881 |
| DB703899 | DB694157 | CD463813 | BE361396 |
| DB703925 | DB726822 | CD463813 | BM317523 |
| DB703931 | BP897648 | CD463813 | CD427714 |
| DB703934 | DB710904 | CD463813 | CD430905 |
| DB703964 | DB723141 | CD463821 | CD431381 |
| DB703999 | DB711576 | CD463839 | CD464127 |
| DB704061 | DB695990 | CD463927 | BM326181 |
| DB704083 | DB689320 | CD463939 | AW563975 |
| DB704108 | DB723647 | CD463962 | BE594984 |
| DB704132 | BP902293 | CD463964 | BE595243 |
| DB704132 | DB682651 | CD463970 | BE596403 |
| DB704175 | DB683451 | CD464054 | CN125404 |
| DB704188 | DB726825 | CD464065 | BI075406 |
| DB704197 | BP890893 | CD464073 | CX607640 |
| DB704197 | BP891015 | CD464108 | CD430583 |
| DB704197 | BP894053 | CD464132 | AW744953 |
| DB704197 | BW689471 | CD464132 | BM326429 |
| DB704197 | BW690758 | CD464133 | CD462589 |
| DB704224 | DB690124 | CD464133 | CN127104 |
| DB704298 | DB722867 | CD464133 | CN127191 |
| DB704300 | DB700450 | CF070591 | BG411766 |
| DB704375 | DB719047 | CF070591 | CX608879 |
| DB704376 | DB679674 | CF070627 | CD426541 |
| DB704379 | DB712719 | CF070750 | BM331299 |
| DB704509 | DB693159 | CF070812 | CN124291 |
| DB704523 | DB724618 | CF070812 | CN124921 |
| DB704605 | DB718448 | CF070812 | CN129285 |
| DB704627 | BP881287 | CF070824 | BI074689 |
| DB704632 | DB726645 | CF070870 | BG412513 |
| DB704641 | DB697745 | CF070939 | CD432685 |
| DB704641 | DB708368 | CF070946 | CF072595 |
| DB704672 | DB697976 | CF070946 | CF073343 |
| DB704672 | DB719047 | CF070946 | CF428053 |
| DB704839 | DB720537 | CF071081 | AW671793 |
| DB704972 | DB724242 | CF071412 | BE598494 |
| DB705072 | DB719483 | CF071460 | AW671921 |
| DB705075 | BP904082 | CF071460 | BE358696 |
| DB705106 | BP897911 | CF071460 | CF074064 |
| DB705181 | DB699273 | CF071494 | CD428244 |
| DB705182 | BP877844 | CF071494 | CF070937 |
| DB705182 | DB704734 | CF071494 | CF070964 |

|          |          |          |          |
|----------|----------|----------|----------|
| DB705279 | DB721077 | CF071494 | CN131493 |
| DB705284 | DB695264 | CF071494 | CX606165 |
| DB705308 | DB717158 | CF071494 | CX606584 |
| DB705439 | DB690409 | CF071494 | CX606930 |
| DB705512 | BP897143 | CF071494 | CX607593 |
| DB705512 | DB698879 | CF071494 | CX608409 |
| DB705531 | BP885631 | CF071494 | CX609785 |
| DB705567 | DB691221 | CF071494 | CX609820 |
| DB705603 | DB720170 | CF071494 | CX610559 |
| DB705794 | DB697556 | CF071494 | CX611262 |
| DB705796 | DB709834 | CF071630 | BG356941 |
| DB705804 | DB684991 | CF071630 | CX611826 |
| DB705944 | DB713706 | CF071718 | CD427619 |
| DB705961 | DB708393 | CF071718 | CD427652 |
| DB705981 | BP901060 | CF071718 | CD462039 |
| DB705989 | DB723757 | CF071718 | CF071105 |
| DB706059 | DB704863 | CF071718 | CF071173 |
| DB706062 | DB700837 | CF071718 | CF071416 |
| DB706170 | DB690124 | CF071718 | CF071531 |
| DB706204 | DB720473 | CF071718 | CF071858 |
| DB706221 | BP907817 | CF071718 | CF072146 |
| DB706260 | DB689400 | CF071718 | CF073386 |
| DB706281 | BW691682 | CF071718 | CF073574 |
| DB706346 | DB707335 | CF071718 | CF074402 |
| DB706412 | DB701852 | CF071770 | CD429586 |
| DB706567 | DB719144 | CF071884 | CD424426 |
| DB706568 | DB697379 | CF072069 | CN128903 |
| DB706590 | DB725272 | CF072260 | AW284786 |
| DB706625 | DB679754 | CF072379 | AW283869 |
| DB706625 | DB680465 | CF072501 | BE358273 |
| DB706625 | DB682491 | CF072528 | AW680141 |
| DB706625 | DB693723 | CF072528 | BE357844 |
| DB706625 | DB703284 | CF072528 | BE594822 |
| DB706625 | DB707172 | CF072528 | BE598346 |
| DB706625 | DB711343 | CF072528 | BG048000 |
| DB706747 | BW691682 | CF072528 | BG049585 |
| DB706766 | DB689572 | CF072528 | BG356898 |
| DB706776 | BP908888 | CF072528 | BG464952 |
| DB706823 | DB715581 | CF072528 | BM325276 |
| DB707048 | DB716800 | CF072528 | BM325279 |
| DB707088 | DB687732 | CF072528 | CX609029 |
| DB707088 | DB717342 | CF072580 | BE599402 |
| DB707089 | DB711225 | CF072580 | BG158240 |
| DB707095 | BP904055 | CF072580 | BI141205 |
| DB707379 | DB718448 | CF072580 | CD424274 |
| DB707408 | DB698252 | CF072580 | CF070612 |
| DB707411 | DB701081 | CF072689 | BM327719 |
| DB707541 | BW686443 | CF072722 | CD426822 |
| DB707541 | BW687264 | CF072778 | BG412400 |
| DB707619 | DB694913 | CF072778 | BG412687 |
| DB707671 | DB695990 | CF072778 | CD428197 |
| DB707735 | BP896773 | CF072778 | CF429004 |

|          |          |          |          |
|----------|----------|----------|----------|
| DB707735 | DB685417 | CF072778 | CF429102 |
| DB707735 | DB687025 | CF072913 | BE599912 |
| DB707735 | DB698930 | CF072913 | BI141206 |
| DB707753 | DB696757 | CF072913 | CD427152 |
| DB707760 | DB679502 | CF072913 | CD427341 |
| DB707760 | DB683540 | CF072956 | CF071336 |
| DB707822 | DB711551 | CF072985 | BE592081 |
| DB707850 | DB705089 | CF072985 | CD428442 |
| DB707926 | DB709359 | CF073084 | AW745849 |
| DB707936 | DB689400 | CF073084 | BE918499 |
| DB707939 | BP906627 | CF073084 | BG048993 |
| DB707939 | BP910582 | CF073084 | CF489906 |
| DB707955 | DB725332 | CF073240 | BE595567 |
| DB707967 | DB689149 | CF073240 | CD425546 |
| DB708022 | DB680432 | CF073349 | BE599250 |
| DB708022 | DB695118 | CF073853 | CF072923 |
| DB708094 | DB710743 | CF073853 | CF074140 |
| DB708106 | DB685968 | CF073853 | CN125382 |
| DB708122 | DB710743 | CF073853 | CN126183 |
| DB708127 | DB716610 | CF074229 | BM330865 |
| DB708147 | DB719588 | CF074411 | BG412419 |
| DB708153 | DB686319 | CF074433 | CN128524 |
| DB708153 | DB687238 | CF074495 | BE596043 |
| DB708172 | DB710743 | CF426891 | BE597905 |
| DB708216 | BP881098 | CF426977 | BE358683 |
| DB708243 | BP910507 | CF426998 | CF488971 |
| DB708388 | BP910792 | CF427038 | CF431427 |
| DB708482 | BP899021 | CF427080 | AW286802 |
| DB708482 | DB694289 | CF427080 | AW563504 |
| DB708482 | DB705087 | CF427080 | AW564246 |
| DB708563 | DB678594 | CF427080 | AW564660 |
| DB708563 | DB713039 | CF427080 | AW565149 |
| DB708563 | DB714188 | CF427080 | AW672230 |
| DB708584 | DB714896 | CF427080 | AW672471 |
| DB708584 | DB721907 | CF427080 | BE361891 |
| DB708605 | DB710743 | CF427080 | BE595494 |
| DB708661 | DB725332 | CF427080 | BE596501 |
| DB708691 | DB697867 | CF427080 | BE600512 |
| DB708722 | BP907817 | CF427080 | BF656999 |
| DB708734 | DB689320 | CF427080 | BG054162 |
| DB708735 | DB696752 | CF427080 | BG241064 |
| DB708736 | DB690124 | CF427080 | BG357323 |
| DB708803 | DB691435 | CF427080 | BG357802 |
| DB708803 | DB692790 | CF427080 | BG412699 |
| DB708803 | DB699813 | CF427080 | BG412853 |
| DB708803 | DB712527 | CF427080 | BG412910 |
| DB708805 | DB696621 | CF427080 | BG463590 |
| DB708820 | DB702024 | CF427080 | BG739464 |
| DB708875 | BP896936 | CF427080 | BI075274 |
| DB708875 | DB692082 | CF427080 | BI075311 |
| DB708875 | DB694856 | CF427080 | BI098298 |
| DB708910 | DB723227 | CF427080 | BI140003 |

|          |          |          |          |
|----------|----------|----------|----------|
| DB708927 | DB684790 | CF427080 | BI141011 |
| DB708927 | DB724245 | CF427080 | BI141117 |
| DB708927 | DB724602 | CF427080 | BM318494 |
| DB708986 | BP886036 | CF427080 | BM322782 |
| DB708991 | BW692115 | CF427080 | CD428573 |
| DB709007 | DB720937 | CF427080 | CD462492 |
| DB709029 | DB682140 | CF427080 | CF428488 |
| DB709037 | DB712021 | CF427080 | CF429083 |
| DB709043 | BW688510 | CF427080 | CF429253 |
| DB709043 | DB696224 | CF427080 | CF429712 |
| DB709043 | DB698073 | CF427080 | CF429989 |
| DB709043 | DB703299 | CF427080 | CF432895 |
| DB709078 | BW692115 | CF427080 | CF432908 |
| DB709115 | DB719545 | CF427080 | CF433501 |
| DB709130 | DB684496 | CF427080 | CF433883 |
| DB709238 | DB709359 | CF427080 | CF482432 |
| DB709262 | DB678507 | CF427080 | CN130003 |
| DB709262 | DB710320 | CF427181 | CD428800 |
| DB709266 | DB699152 | CF427247 | BE367272 |
| DB709310 | DB709658 | CF427263 | CF432289 |
| DB709344 | DB692679 | CF427278 | BE363067 |
| DB709460 | DB709834 | CF427291 | BF176895 |
| DB709460 | DB712542 | CF427291 | BG411545 |
| DB709467 | DB721260 | CF427291 | CD432397 |
| DB709529 | DB720808 | CF427291 | CF433505 |
| DB709538 | DB726876 | CF427291 | CX609460 |
| DB709538 | DB727111 | CF427314 | BE599250 |
| DB709560 | DB716800 | CF427428 | CF433558 |
| DB709697 | DB720789 | CF427472 | CF428346 |
| DB709737 | DB692453 | CF427593 | CF428350 |
| DB709739 | DB686397 | CF427596 | BG322455 |
| DB709770 | DB691221 | CF427596 | CF489772 |
| DB709838 | DB712782 | CF427596 | CN128055 |
| DB709840 | DB700965 | CF427596 | CX610753 |
| DB709893 | DB700194 | CF427599 | CF430308 |
| DB709893 | DB702600 | CF427647 | BM325719 |
| DB709936 | DB711757 | CF427647 | CD428999 |
| DB709944 | BW692853 | CF427647 | CD430268 |
| DB709952 | DB715288 | CF427647 | CD430930 |
| DB710026 | DB725553 | CF427647 | CD463000 |
| DB710037 | BW687789 | CF427647 | CD463653 |
| DB710077 | DB681690 | CF427647 | CF427132 |
| DB710107 | BP884954 | CF427647 | CF428181 |
| DB710156 | DB725553 | CF427647 | CF428349 |
| DB710175 | BP911318 | CF427647 | CF428791 |
| DB710248 | DB718350 | CF427647 | CF428934 |
| DB710248 | DB719981 | CF427647 | CF428972 |
| DB710370 | DB683641 | CF427647 | CF429664 |
| DB710383 | DB711480 | CF427647 | CF430665 |
| DB710383 | DB720598 | CF427647 | CN125206 |
| DB710384 | DB678662 | CF427725 | CX610134 |
| DB710384 | DB683958 | CF427754 | CD428671 |



|          |          |          |          |
|----------|----------|----------|----------|
| DB710384 | DB685972 | CF427838 | AW283395 |
| DB710384 | DB686008 | CF427838 | AW678812 |
| DB710384 | DB692352 | CF427838 | AW680930 |
| DB710384 | DB694852 | CF427838 | AW745809 |
| DB710384 | DB705886 | CF427838 | AW746142 |
| DB710384 | DB721477 | CF427838 | AW747632 |
| DB710439 | DB723444 | CF427838 | AW923930 |
| DB710439 | DB726098 | CF427838 | AW924174 |
| DB710455 | DB720311 | CF427838 | AW924846 |
| DB710459 | DB710743 | CF427838 | BE363628 |
| DB710522 | DB710596 | CF427838 | BE366570 |
| DB710545 | DB709834 | CF427838 | BE367052 |
| DB710560 | DB679417 | CF427838 | BE592178 |
| DB710570 | DB688086 | CF427838 | BE592192 |
| DB710583 | DB678985 | CF427838 | BE593715 |
| DB710583 | DB680327 | CF427838 | BE597315 |
| DB710583 | DB692439 | CF427838 | BE600252 |
| DB710583 | DB692666 | CF427838 | BM318272 |
| DB710583 | DB696771 | CF427838 | CD423409 |
| DB710583 | DB701022 | CF427838 | CD425743 |
| DB710583 | DB702668 | CF427838 | CD426367 |
| DB710583 | DB706619 | CF427838 | CN123866 |
| DB710583 | DB707429 | CF427838 | CN124986 |
| DB710583 | DB710984 | CF427838 | CN125022 |
| DB710583 | DB714475 | CF427838 | EB725738 |
| DB710583 | DB715314 | CF427838 | EB725802 |
| DB710583 | DB716601 | CF427873 | BG356673 |
| DB710621 | DB689062 | CF427901 | CD428310 |
| DB710621 | DB697221 | CF428045 | CF482852 |
| DB710621 | DB704800 | CF428045 | CN126501 |
| DB710621 | DB711771 | CF428047 | CN130125 |
| DB710809 | BP885642 | CF428083 | AW564923 |
| DB710809 | BP890721 | CF428083 | BG158104 |
| DB710809 | BP891019 | CF428083 | BG557548 |
| DB710809 | BP891139 | CF428083 | BI211975 |
| DB710809 | BP893160 | CF428083 | BI351539 |
| DB710809 | BP893814 | CF428083 | BI643720 |
| DB710809 | BW685170 | CF428083 | CD426020 |
| DB710809 | BW685340 | CF428083 | CD426111 |
| DB710809 | BW685390 | CF428083 | CD431430 |
| DB710809 | BW685564 | CF428083 | CD462604 |
| DB710809 | BW685615 | CF428083 | CD463587 |
| DB710809 | BW686291 | CF428083 | CF071104 |
| DB710809 | BW686386 | CF428083 | CF428228 |
| DB710809 | BW686392 | CF428083 | CF429656 |
| DB710809 | BW687019 | CF428083 | CF429662 |
| DB710809 | BW687172 | CF428083 | CF432400 |
| DB710809 | BW687181 | CF428083 | CF433008 |
| DB710809 | BW687322 | CF428083 | CF433994 |
| DB710809 | BW687414 | CF428083 | CF434056 |
| DB710809 | BW688073 | CF428083 | CF481347 |
| DB710809 | BW688438 | CF428083 | CF481540 |

|          |          |          |          |
|----------|----------|----------|----------|
| DB710809 | BW689007 | CF428083 | CF486447 |
| DB710809 | BW689015 | CF428083 | CF489803 |
| DB710809 | BW689235 | CF428083 | CN126013 |
| DB710809 | BW689359 | CF428083 | CN129515 |
| DB710809 | BW689494 | CF428083 | CN129984 |
| DB710809 | BW689740 | CF428083 | CX609101 |
| DB710809 | BW690666 | CF428083 | CX609115 |
| DB710809 | BW690686 | CF428083 | CX610583 |
| DB710809 | BW690702 | CF428083 | CX610624 |
| DB710809 | BW690936 | CF428083 | CX610785 |
| DB710809 | BW691157 | CF428085 | CN130005 |
| DB710809 | BW691213 | CF428127 | BG357581 |
| DB710809 | BW692155 | CF428171 | BM318217 |
| DB710809 | BW692191 | CF428207 | CF071967 |
| DB710809 | BW692681 | CF428344 | CF432865 |
| DB710809 | BW692916 | CF428344 | CN130330 |
| DB710809 | DB714484 | CF428344 | CX607089 |
| DB710809 | DB716790 | CF428463 | CF486560 |
| DB710809 | DB721878 | CF428470 | AW284918 |
| DB710809 | DB723830 | CF428600 | CF432137 |
| DB710813 | DB726822 | CF428600 | CX606450 |
| DB710821 | DB708850 | CF428600 | CX608531 |
| DB710835 | DB723516 | CF428689 | CN127806 |
| DB710856 | DB716670 | CF428689 | CN128138 |
| DB710902 | BP880078 | CF428770 | CN130221 |
| DB710920 | DB687732 | CF428801 | CF428063 |
| DB710920 | DB711551 | CF428828 | BE596561 |
| DB710920 | DB717342 | CF428880 | BM331429 |
| DB710946 | BW691106 | CF428935 | CF428346 |
| DB710995 | BW687786 | CF428950 | CD425301 |
| DB711011 | DB726859 | CF428971 | CX608615 |
| DB711264 | DB710881 | CF428998 | CF487054 |
| DB711264 | DB715378 | CF429177 | BM326828 |
| DB711338 | DB681596 | CF429236 | CF428063 |
| DB711425 | DB691126 | CF429296 | CX610209 |
| DB711457 | DB712500 | CF429414 | AW564430 |
| DB711467 | DB701840 | CF429415 | CF428076 |
| DB711497 | DB682890 | CF429415 | CF430822 |
| DB711497 | DB694008 | CF429415 | CF433676 |
| DB711497 | DB705559 | CF429415 | CX611746 |
| DB711497 | DB715047 | CF429467 | CD429699 |
| DB711497 | DB715178 | CF429492 | BG357428 |
| DB711497 | DB716506 | CF429492 | BM327758 |
| DB711497 | DB726999 | CF429492 | CD429024 |
| DB711511 | BP880726 | CF429492 | CF483525 |
| DB711511 | BP885826 | CF429492 | CN126727 |
| DB711511 | DB692258 | CF429492 | CN127455 |
| DB711511 | DB693018 | CF429552 | AW745071 |
| DB711511 | DB711628 | CF429552 | BI211312 |
| DB711511 | DB722248 | CF429552 | CD428916 |
| DB711521 | DB706338 | CF429724 | AW677528 |
| DB711599 | BW687128 | CF429724 | BE356301 |

|          |          |          |          |
|----------|----------|----------|----------|
| DB711650 | BP880563 | CF429724 | BE356557 |
| DB711664 | DB709122 | CF429724 | BE358288 |
| DB711695 | DB723391 | CF429724 | BE359673 |
| DB711764 | BP878652 | CF429724 | BE361552 |
| DB711764 | DB684384 | CF429724 | BE361566 |
| DB711764 | DB714957 | CF429724 | BE599939 |
| DB711764 | DB715207 | CF429724 | BG411528 |
| DB711764 | DB725319 | CF429724 | BG464316 |
| DB711780 | DB713519 | CF429724 | BG947827 |
| DB711810 | DB722871 | CF429724 | BI246010 |
| DB711932 | DB724103 | CF429724 | CD428682 |
| DB711944 | BP889957 | CF429724 | CD430015 |
| DB711944 | DB690052 | CF429724 | CD430042 |
| DB711944 | DB696799 | CF429724 | CD430574 |
| DB711944 | DB697806 | CF429724 | CF428211 |
| DB711944 | DB698073 | CF429724 | CF428496 |
| DB711944 | DB706795 | CF429724 | CN125072 |
| DB712076 | DB720588 | CF429724 | CN129150 |
| DB712119 | DB683579 | CF429734 | CX610209 |
| DB712119 | DB721708 | CF429944 | BE359238 |
| DB712146 | BP885951 | CF430015 | BG357806 |
| DB712176 | DB717000 | CF430015 | BG412912 |
| DB712228 | DB718448 | CF430015 | BG464342 |
| DB712228 | DB718462 | CF430015 | BG946902 |
| DB712299 | DB699072 | CF430015 | BI075237 |
| DB712324 | DB684991 | CF430015 | BI098428 |
| DB712326 | DB704443 | CF430015 | BI098969 |
| DB712335 | DB686525 | CF430015 | CF489758 |
| DB712335 | DB688086 | CF430015 | CN126535 |
| DB712360 | DB722284 | CF430015 | CN129698 |
| DB712401 | BW687770 | CF430015 | CX607962 |
| DB712548 | DB703739 | CF430015 | CX609570 |
| DB712584 | DB709359 | CF430130 | CF428212 |
| DB712585 | DB687732 | CF430150 | CD463287 |
| DB712585 | DB717342 | CF430178 | AW285766 |
| DB712642 | DB684991 | CF430178 | AW287269 |
| DB712655 | DB723516 | CF430178 | AW564847 |
| DB712656 | DB710291 | CF430178 | AW671670 |
| DB712663 | DB686291 | CF430178 | AW671773 |
| DB712663 | DB698321 | CF430178 | AW745068 |
| DB712663 | DB700428 | CF430178 | BE356715 |
| DB712693 | DB700450 | CF430178 | BE366787 |
| DB712788 | DB721492 | CF430178 | BE598820 |
| DB712849 | DB706702 | CF430178 | CD430919 |
| DB712893 | BP876001 | CF430178 | CD431393 |
| DB712893 | BP878903 | CF430178 | CF432576 |
| DB712893 | BP880222 | CF430211 | BG357355 |
| DB712893 | BP902369 | CF430350 | CN125679 |
| DB712893 | BW685264 | CF430350 | CX607456 |
| DB712958 | DB716864 | CF430350 | CX607633 |
| DB712960 | DB710743 | CF430403 | CF432088 |
| DB712964 | DB713706 | CF430437 | BE361347 |

|          |          |          |          |
|----------|----------|----------|----------|
| DB712982 | DB694706 | CF430437 | CN126772 |
| DB712989 | DB710596 | CF430437 | CX609652 |
| DB713071 | DB710743 | CF430445 | BE355227 |
| DB713095 | DB690585 | CF430445 | BE361931 |
| DB713095 | DB703027 | CF430509 | CF433339 |
| DB713097 | DB708080 | CF430509 | CF434192 |
| DB713149 | BP883623 | CF430509 | CN128323 |
| DB713149 | DB684511 | CF430512 | BG411089 |
| DB713149 | DB684801 | CF430512 | CF428964 |
| DB713149 | DB695855 | CF430512 | CF484981 |
| DB713149 | DB722750 | CF430512 | CF488677 |
| DB713149 | DB723737 | CF430512 | CN125852 |
| DB713162 | BP881947 | CF430512 | CN126169 |
| DB713162 | DB724538 | CF430512 | CX610892 |
| DB713204 | BP896509 | CF430512 | CX611794 |
| DB713204 | BP897836 | CF430604 | CN130213 |
| DB713348 | DB691494 | CF430648 | CD424703 |
| DB713353 | DB714542 | CF430648 | CD427619 |
| DB713385 | DB683579 | CF430648 | CD462039 |
| DB713385 | DB721708 | CF430648 | CF070517 |
| DB713483 | DB727410 | CF430648 | CF071049 |
| DB713508 | DB700450 | CF430648 | CF071243 |
| DB713565 | DB689400 | CF430648 | CF071324 |
| DB713637 | BP891879 | CF430648 | CF071858 |
| DB713637 | BW690726 | CF430648 | CF072121 |
| DB713642 | BW685507 | CF430648 | CF072150 |
| DB713684 | DB686525 | CF430648 | CF072243 |
| DB713735 | DB726859 | CF430648 | CF072269 |
| DB713747 | DB678583 | CF430648 | CF072439 |
| DB713750 | DB680054 | CF430648 | CF072685 |
| DB713750 | DB684598 | CF430648 | CF072760 |
| DB713778 | DB724310 | CF430648 | CF073542 |
| DB713896 | DB709106 | CF430648 | CF073985 |
| DB713896 | DB709910 | CF430648 | CF074315 |
| DB713923 | DB710743 | CF430648 | CF074402 |
| DB713955 | DB712355 | CF430661 | AW563904 |
| DB713956 | BP887078 | CF430661 | AW563965 |
| DB714016 | BP879765 | CF430696 | AW284004 |
| DB714016 | DB682356 | CF430727 | BM318308 |
| DB714016 | DB686186 | CF430736 | CF483680 |
| DB714016 | DB701022 | CF430750 | CD426223 |
| DB714016 | DB702668 | CF430814 | BG649399 |
| DB714016 | DB706965 | CF430886 | CF433627 |
| DB714016 | DB707429 | CF430886 | CN127450 |
| DB714016 | DB714475 | CF430886 | CN130976 |
| DB714078 | DB716102 | CF430886 | CX606455 |
| DB714171 | DB692679 | CF430915 | CD432674 |
| DB714190 | DB708170 | CF430915 | CF431054 |
| DB714279 | DB718012 | CF430975 | BG049463 |
| DB714279 | DB725555 | CF430975 | CF428739 |
| DB714279 | DB725567 | CF431049 | AW286940 |
| DB714287 | DB723903 | CF431049 | AW286951 |

|          |          |          |          |
|----------|----------|----------|----------|
| DB714297 | DB726236 | CF431049 | BE125689 |
| DB714307 | DB722308 | CF431049 | BE125739 |
| DB714348 | DB713848 | CF431049 | BF177145 |
| DB714353 | DB714830 | CF431049 | BF657141 |
| DB714359 | DB680885 | CF431049 | BG054133 |
| DB714664 | DB689363 | CF431049 | BG054155 |
| DB714664 | DB695990 | CF431049 | BG357888 |
| DB714684 | DB723187 | CF431049 | BG463890 |
| DB714787 | DB716360 | CF431049 | BG947296 |
| DB714792 | DB717259 | CF431049 | BG947799 |
| DB714817 | DB721738 | CF431049 | BG947931 |
| DB714820 | DB699072 | CF431049 | BG948468 |
| DB714877 | DB700450 | CF431049 | BG948607 |
| DB714977 | DB718448 | CF431049 | BG948760 |
| DB714985 | DB710335 | CF431049 | BI075807 |
| DB715004 | DB723217 | CF431049 | BI076216 |
| DB715046 | DB709334 | CF431049 | BI140061 |
| DB715190 | DB710128 | CF431049 | BI140447 |
| DB715235 | DB696621 | CF431049 | BI211819 |
| DB715260 | DB714624 | CF431049 | CF430529 |
| DB715277 | DB678631 | CF431049 | CN127349 |
| DB715303 | DB694913 | CF431049 | CN128992 |
| DB715304 | DB711609 | CF431049 | CN129459 |
| DB715330 | DB694706 | CF431049 | CN130437 |
| DB715384 | DB725410 | CF431049 | CX607278 |
| DB715479 | DB693174 | CF431049 | CX607909 |
| DB715548 | DB702511 | CF431049 | CX608143 |
| DB715643 | DB686944 | CF431049 | CX609258 |
| DB715756 | DB700450 | CF431049 | CX610556 |
| DB715764 | DB720473 | CF431204 | BE356464 |
| DB715799 | DB708393 | CF431204 | BE596685 |
| DB715897 | DB719588 | CF431214 | CF487245 |
| DB715936 | DB686332 | CF431214 | CN126859 |
| DB715964 | DB697350 | CF431358 | CF433487 |
| DB716007 | DB692372 | CF431358 | CN127588 |
| DB716087 | BP875881 | CF431478 | BG054412 |
| DB716087 | BP886139 | CF431478 | BG412870 |
| DB716087 | DB678836 | CF431498 | BE367283 |
| DB716087 | DB681588 | CF431498 | BG048610 |
| DB716087 | DB692294 | CF431498 | CF071005 |
| DB716087 | DB692366 | CF431585 | AW677200 |
| DB716087 | DB700335 | CF431585 | BE125199 |
| DB716087 | DB722441 | CF431585 | BG273528 |
| DB716087 | DB722905 | CF431591 | AW564867 |
| DB716087 | DB723199 | CF431591 | BE125689 |
| DB716093 | BP884763 | CF431591 | BF177145 |
| DB716103 | DB713239 | CF431591 | BG947995 |
| DB716106 | DB723217 | CF431591 | BG948760 |
| DB716126 | DB711649 | CF431591 | BI075388 |
| DB716150 | DB710596 | CF431591 | BI211277 |
| DB716151 | DB686625 | CF431591 | CD431264 |
| DB716184 | DB716800 | CF431591 | CD463024 |

|          |          |          |          |
|----------|----------|----------|----------|
| DB716191 | DB710904 | CF431591 | CF427446 |
| DB716242 | BP906818 | CF431591 | CF431340 |
| DB716242 | DB700343 | CF431591 | CF431717 |
| DB716264 | DB691440 | CF431591 | CN124304 |
| DB716272 | DB719588 | CF431591 | CX608143 |
| DB716306 | DB683872 | CF431591 | CX609258 |
| DB716306 | DB713156 | CF431591 | CX610743 |
| DB716306 | DB722132 | CF431591 | CX611436 |
| DB716339 | DB703075 | CF431591 | CX612090 |
| DB716433 | DB691004 | CF431639 | BI245856 |
| DB716433 | DB707951 | CF431806 | BI098466 |
| DB716433 | DB719579 | CF431862 | CX610209 |
| DB716433 | DB723655 | CF431890 | CN125417 |
| DB716471 | DB724242 | CF431928 | CX610132 |
| DB716545 | BP885631 | CF431988 | AW284004 |
| DB716554 | BP895491 | CF432005 | CN129403 |
| DB716598 | DB710723 | CF432013 | CD462026 |
| DB716601 | DB717914 | CF432013 | CF071967 |
| DB716617 | DB720724 | CF432013 | CF074309 |
| DB716685 | DB713706 | CF432032 | CF487754 |
| DB716698 | BP884763 | CF432085 | BG356673 |
| DB716784 | BP885642 | CF432098 | BE600444 |
| DB716784 | BP890721 | CF432431 | AW745047 |
| DB716784 | BP891019 | CF432431 | BE599461 |
| DB716784 | BP891139 | CF432431 | BM325616 |
| DB716784 | BP893160 | CF432506 | BG739379 |
| DB716784 | BP893814 | CF432532 | CF430759 |
| DB716784 | BW685170 | CF432541 | CD422940 |
| DB716784 | BW685340 | CF432541 | CD430583 |
| DB716784 | BW685390 | CF432560 | CF073811 |
| DB716784 | BW685564 | CF432563 | CN128323 |
| DB716784 | BW685615 | CF432659 | CF430386 |
| DB716784 | BW686291 | CF432706 | BG355457 |
| DB716784 | BW686386 | CF432706 | BG556835 |
| DB716784 | BW686392 | CF432706 | BG948481 |
| DB716784 | BW687019 | CF432706 | BI140717 |
| DB716784 | BW687172 | CF432714 | CF430946 |
| DB716784 | BW687181 | CF432714 | CX607132 |
| DB716784 | BW687322 | CF432799 | AW565290 |
| DB716784 | BW687414 | CF432799 | BE360457 |
| DB716784 | BW688073 | CF432799 | BE366899 |
| DB716784 | BW688438 | CF432799 | BE367024 |
| DB716784 | BW689007 | CF432799 | BE597111 |
| DB716784 | BW689015 | CF432799 | BE600244 |
| DB716784 | BW689235 | CF432799 | BG048452 |
| DB716784 | BW689359 | CF432799 | BG048487 |
| DB716784 | BW689494 | CF432799 | BG357628 |
| DB716784 | BW689740 | CF432799 | BG410817 |
| DB716784 | BW690666 | CF432799 | BG556254 |
| DB716784 | BW690686 | CF432799 | BG556537 |
| DB716784 | BW690702 | CF432799 | BI099554 |
| DB716784 | BW690936 | CF432799 | BI211472 |

|          |          |          |          |
|----------|----------|----------|----------|
| DB716784 | BW691157 | CF432799 | BM329737 |
| DB716784 | BW691213 | CF432799 | CD424709 |
| DB716784 | BW692155 | CF432799 | CD424736 |
| DB716784 | BW692191 | CF432799 | CD429049 |
| DB716784 | BW692681 | CF432799 | CF071231 |
| DB716784 | BW692916 | CF432799 | CF073731 |
| DB716784 | DB714484 | CF432799 | CF428702 |
| DB716784 | DB716790 | CF432799 | CF432242 |
| DB716784 | DB721878 | CF432799 | CF490054 |
| DB716784 | DB723830 | CF432842 | AW285942 |
| DB716787 | DB695929 | CF432842 | AW681060 |
| DB716840 | DB716800 | CF432842 | BE359328 |
| DB716852 | DB691221 | CF432842 | BE361337 |
| DB716925 | DB722793 | CF432842 | BE362396 |
| DB716984 | DB709406 | CF432842 | BE595446 |
| DB717099 | DB710178 | CF432842 | BE596508 |
| DB717177 | DB721543 | CF432842 | BE597663 |
| DB717192 | DB704759 | CF432842 | BE598688 |
| DB717250 | DB678507 | CF432842 | BE599894 |
| DB717286 | DB715378 | CF432842 | BE599973 |
| DB717343 | BP897692 | CF432842 | BE600723 |
| DB717343 | BP898053 | CF432842 | BE600789 |
| DB717343 | BP898646 | CF432842 | BG158239 |
| DB717343 | BP899088 | CF432842 | BG158288 |
| DB717343 | DB679437 | CF432842 | BG159717 |
| DB717343 | DB716753 | CF432842 | BG355399 |
| DB717448 | DB709469 | CF432842 | BG355717 |
| DB717448 | DB711442 | CF432842 | BG357252 |
| DB717467 | DB725410 | CF432842 | BG411323 |
| DB717550 | DB682886 | CF432842 | BG464324 |
| DB717565 | DB711649 | CF432842 | BG465184 |
| DB717565 | DB717050 | CF432842 | BG948659 |
| DB717635 | DB710128 | CF432842 | BI075235 |
| DB717641 | DB683995 | CF432842 | BI076194 |
| DB717641 | DB703982 | CF432842 | BI099051 |
| DB717641 | DB708150 | CF432842 | BI140431 |
| DB717642 | DB712719 | CF432842 | BI140788 |
| DB717655 | DB713774 | CF432842 | BI211308 |
| DB717655 | DB714866 | CF432842 | CD422977 |
| DB717697 | BW685507 | CF432842 | CD424781 |
| DB717784 | DB712766 | CF432842 | CD425139 |
| DB717830 | DB718448 | CF432842 | CD427327 |
| DB717836 | DB717433 | CF432842 | CF071438 |
| DB717939 | DB725647 | CF432842 | CF071815 |
| DB717951 | DB720537 | CF432842 | CF071928 |
| DB718027 | DB727540 | CF432842 | CF071945 |
| DB718078 | DB710596 | CF432842 | CF072569 |
| DB718090 | BW689503 | CF432842 | CF072578 |
| DB718090 | DB696047 | CF432842 | CF073829 |
| DB718093 | DB708802 | CF432842 | CN124115 |
| DB718133 | BP884763 | CF432842 | CX607286 |
| DB718136 | BP901060 | CF432857 | CF428534 |

|          |          |          |          |
|----------|----------|----------|----------|
| DB718203 | DB690338 | CF432867 | AW747150 |
| DB718269 | DB680581 | CF432882 | CD425357 |
| DB718269 | DB721931 | CF432882 | CN129326 |
| DB718362 | BP881208 | CF432882 | CX606155 |
| DB718362 | BP888733 | CF432882 | CX606913 |
| DB718362 | BW687729 | CF432914 | AW672386 |
| DB718398 | DB678583 | CF432914 | CF429132 |
| DB718410 | DB681828 | CF432914 | CF430168 |
| DB718410 | DB689874 | CF432982 | BG649262 |
| DB718410 | DB692405 | CF432993 | BI074334 |
| DB718410 | DB697868 | CF432999 | CF485897 |
| DB718410 | DB708523 | CF433051 | BM325619 |
| DB718476 | DB710499 | CF433088 | CN127701 |
| DB718554 | DB693810 | CF433088 | CN128622 |
| DB718610 | DB714236 | CF433125 | CX610209 |
| DB718613 | DB710881 | CF433139 | AW284004 |
| DB718613 | DB715378 | CF433185 | BM323617 |
| DB718666 | BP885951 | CF433261 | CF429219 |
| DB718692 | DB716165 | CF433261 | CF429230 |
| DB718776 | DB695990 | CF433290 | BF176683 |
| DB718854 | DB680829 | CF433296 | AW284004 |
| DB718923 | DB692906 | CF433321 | CX610209 |
| DB718982 | BW685507 | CF433355 | CX611795 |
| DB719027 | DB712156 | CF433387 | AW678052 |
| DB719035 | DB710214 | CF433387 | BE366149 |
| DB719063 | DB709834 | CF433387 | BE597478 |
| DB719068 | DB701592 | CF433387 | BE599227 |
| DB719068 | DB724310 | CF433387 | BG322654 |
| DB719082 | DB721260 | CF433387 | CF433012 |
| DB719089 | DB719483 | CF433387 | CF485280 |
| DB719095 | DB721559 | CF433387 | CX610631 |
| DB719098 | DB683519 | CF433388 | BI139903 |
| DB719124 | DB725410 | CF433388 | CF433739 |
| DB719167 | DB723635 | CF433405 | BG158109 |
| DB719244 | DB725398 | CF433449 | AW284962 |
| DB719263 | DB725398 | CF433449 | BE362048 |
| DB719279 | DB680829 | CF433449 | BE592298 |
| DB719295 | BW686020 | CF433449 | BE593767 |
| DB719295 | BW690750 | CF433449 | BE601168 |
| DB719295 | BW691979 | CF433449 | BE918307 |
| DB719295 | DB690878 | CF433449 | BG054237 |
| DB719295 | DB703472 | CF433449 | BG323061 |
| DB719295 | DB714157 | CF433449 | BG356021 |
| DB719295 | DB723465 | CF433449 | BG411491 |
| DB719375 | DB693669 | CF433449 | BG411859 |
| DB719375 | DB701278 | CF433449 | BG557036 |
| DB719375 | DB714343 | CF433449 | BG739291 |
| DB719375 | DB717443 | CF433449 | BM328215 |
| DB719375 | DB727574 | CF433449 | BM328398 |
| DB719397 | DB710743 | CF433449 | BM329313 |
| DB719419 | DB723984 | CF433449 | BM331324 |
| DB719477 | DB710128 | CF433449 | CD427929 |



|          |          |          |          |
|----------|----------|----------|----------|
| DB719581 | DB686625 | CF433449 | CD431533 |
| DB719591 | DB721720 | CF433449 | CF428477 |
| DB719604 | DB718497 | CF433449 | CF428984 |
| DB719671 | BW687141 | CF433449 | CF429887 |
| DB719679 | DB712500 | CF433449 | CF485726 |
| DB719699 | DB724522 | CF433449 | CN130848 |
| DB719711 | DB714624 | CF433449 | CN131482 |
| DB719722 | DB679873 | CF433449 | CX607182 |
| DB719728 | DB721665 | CF433449 | CX612044 |
| DB719787 | BP884763 | CF433449 | EB724930 |
| DB719800 | DB710513 | CF433449 | EB724937 |
| DB719887 | DB683872 | CF433469 | CX610209 |
| DB719938 | DB678427 | CF433598 | AW286471 |
| DB719997 | DB695735 | CF433598 | AW563366 |
| DB719997 | DB696292 | CF433598 | BE361347 |
| DB720009 | DB722308 | CF433598 | BG049553 |
| DB720032 | DB705299 | CF433598 | BG323181 |
| DB720062 | BP906405 | CF433598 | BG356418 |
| DB720062 | BP911400 | CF433598 | BG464871 |
| DB720126 | DB711225 | CF433598 | BG465327 |
| DB720147 | DB711917 | CF433598 | BI099132 |
| DB720147 | DB723408 | CF433598 | BM330447 |
| DB720249 | DB725553 | CF433598 | CD425013 |
| DB720272 | DB702516 | CF433598 | CF429495 |
| DB720295 | DB693898 | CF433598 | CN126772 |
| DB720335 | DB725332 | CF433598 | CN128868 |
| DB720368 | DB701852 | CF433598 | CX609652 |
| DB720438 | DB715619 | CF433598 | CX611353 |
| DB720481 | DB712355 | CF433602 | CN130213 |
| DB720540 | BP899805 | CF433619 | CX610209 |
| DB720613 | BP884763 | CF433639 | BE364764 |
| DB720673 | DB726276 | CF433651 | BI075249 |
| DB720710 | DB701081 | CF433651 | CD427348 |
| DB720795 | BP878510 | CF433651 | CD432022 |
| DB720795 | BP880312 | CF433651 | CF071272 |
| DB720795 | BP880970 | CF433651 | CF489662 |
| DB720795 | BP881573 | CF433651 | CN127036 |
| DB720795 | BP882110 | CF433651 | CN127593 |
| DB720795 | BP882208 | CF433693 | CD430583 |
| DB720795 | BP886380 | CF433701 | CX607484 |
| DB720795 | BP887383 | CF433775 | AW565337 |
| DB720795 | BP888149 | CF433775 | BE355144 |
| DB720795 | BP899884 | CF433775 | BE358899 |
| DB720795 | BP910576 | CF433775 | BE362972 |
| DB720795 | BW692555 | CF433775 | BG049247 |
| DB720795 | DB680908 | CF433775 | BG240066 |
| DB720795 | DB687975 | CF433775 | CD428033 |
| DB720795 | DB692793 | CF433775 | CN126606 |
| DB720795 | DB695801 | CF433780 | CX607854 |
| DB720795 | DB698060 | CF433782 | CX610209 |
| DB720795 | DB704814 | CF433814 | BG713861 |
| DB720795 | DB704960 | CF433834 | AW286940 |

|          |          |          |          |
|----------|----------|----------|----------|
| DB720795 | DB708451 | CF433834 | AW671525 |
| DB720795 | DB714572 | CF433834 | AW744884 |
| DB720839 | DB705485 | CF433834 | BE125739 |
| DB721029 | DB713501 | CF433834 | BE359342 |
| DB721032 | DB704987 | CF433834 | BG355424 |
| DB721051 | DB719588 | CF433834 | BG946971 |
| DB721128 | BW690229 | CF433834 | BG948607 |
| DB721128 | DB726640 | CF433834 | BI076253 |
| DB721149 | DB700965 | CF433834 | BI098932 |
| DB721198 | DB692679 | CF433834 | BI140061 |
| DB721227 | BP885951 | CF433834 | BI246142 |
| DB721363 | BP884763 | CF433834 | CF431340 |
| DB721417 | DB720537 | CF433834 | CF434211 |
| DB721435 | DB722145 | CF433834 | CF485752 |
| DB721435 | DB723037 | CF433834 | CN127349 |
| DB721701 | BW689483 | CF433840 | BI245856 |
| DB721748 | DB688988 | CF433856 | AW671676 |
| DB721748 | DB725095 | CF433875 | CD431736 |
| DB721748 | DB726627 | CF433875 | CF434388 |
| DB721757 | DB682121 | CF433893 | BE355144 |
| DB721757 | DB697837 | CF433893 | BE358899 |
| DB721807 | DB723903 | CF433893 | BE362972 |
| DB721826 | DB713715 | CF433893 | CD428033 |
| DB721826 | DB724900 | CF433893 | CD462686 |
| DB721828 | DB700881 | CF433900 | CF429261 |
| DB721871 | DB708697 | CF433900 | CF430020 |
| DB721949 | DB710028 | CF433900 | CF433009 |
| DB721950 | BW691682 | CF433900 | CF433175 |
| DB721957 | BP880078 | CF433900 | CN124877 |
| DB722017 | BP881098 | CF433900 | CX609631 |
| DB722093 | DB688086 | CF433901 | BG355457 |
| DB722101 | DB710772 | CF433901 | BG947237 |
| DB722119 | DB708157 | CF433901 | BI098789 |
| DB722124 | DB700450 | CF433901 | BI141074 |
| DB722165 | DB701548 | CF433901 | CF433668 |
| DB722316 | DB703905 | CF433901 | CN125876 |
| DB722316 | DB721851 | CF433907 | AW565406 |
| DB722405 | BP887932 | CF433907 | BM318473 |
| DB722414 | BP892702 | CF433907 | CD462796 |
| DB722488 | BP893130 | CF433979 | CF428063 |
| DB722488 | BP906818 | CF433998 | CF431454 |
| DB722488 | DB682361 | CF433998 | CN131104 |
| DB722497 | DB706424 | CF433998 | CX607905 |
| DB722525 | DB696621 | CF434034 | BG556958 |
| DB722568 | DB681844 | CF434034 | BI139981 |
| DB722661 | BW687786 | CF434034 | BI140433 |
| DB722713 | DB710178 | CF434034 | BI140966 |
| DB722739 | DB724928 | CF434034 | CX606163 |
| DB722844 | DB707724 | CF434051 | BE598661 |
| DB722844 | DB713414 | CF434051 | BG357239 |
| DB722880 | DB722102 | CF434052 | BI098343 |
| DB722886 | DB703482 | CF434111 | CN128124 |

|          |          |          |          |
|----------|----------|----------|----------|
| DB722915 | DB690206 | CF434205 | CD432683 |
| DB722963 | DB710084 | CF434316 | CF484716 |
| DB722989 | DB692082 | CF434331 | CF482990 |
| DB723042 | DB697221 | CF434331 | CN125273 |
| DB723044 | DB692460 | CF434344 | CD430208 |
| DB723168 | BP880563 | CF434363 | BM323455 |
| DB723205 | DB690248 | CF434363 | CF480429 |
| DB723205 | DB698695 | CF434365 | AW671325 |
| DB723205 | DB712385 | CF434365 | CN128595 |
| DB723226 | DB714830 | CF479925 | CD430392 |
| DB723297 | DB724310 | CF479925 | CF486557 |
| DB723340 | DB678583 | CF479946 | BG049510 |
| DB723360 | DB682654 | CF479952 | CF482396 |
| DB723421 | DB720588 | CF480015 | AW678016 |
| DB723514 | BP884763 | CF480015 | AW678391 |
| DB723527 | BP885631 | CF480015 | BG465411 |
| DB723533 | DB716610 | CF480054 | CF480411 |
| DB723556 | DB695929 | CF480054 | CF480457 |
| DB723575 | DB716750 | CF480054 | CF484048 |
| DB723638 | DB716316 | CF480054 | CF488363 |
| DB723673 | DB689864 | CF480074 | CD432683 |
| DB723673 | DB692372 | CF480078 | CF428905 |
| DB723695 | DB710178 | CF480078 | CF485932 |
| DB723726 | DB725398 | CF480120 | CF486770 |
| DB723759 | DB715392 | CF480215 | CF428969 |
| DB723962 | BW691106 | CF480218 | CD424638 |
| DB724007 | DB727410 | CF480238 | CD432683 |
| DB724018 | DB709834 | CF480382 | CF485617 |
| DB724038 | DB708697 | CF480449 | CD432683 |
| DB724111 | DB715392 | CF480490 | CF482771 |
| DB724112 | DB720831 | CF480510 | CF487054 |
| DB724112 | DB727631 | CF480548 | BG411940 |
| DB724158 | BP900248 | CF480549 | BF176665 |
| DB724226 | DB718012 | CF480566 | BE361906 |
| DB724226 | DB725555 | CF480566 | CD428252 |
| DB724226 | DB725567 | CF480566 | CD431591 |
| DB724255 | DB712345 | CF480566 | CF426924 |
| DB724306 | DB703568 | CF480566 | CF428769 |
| DB724306 | DB704328 | CF480566 | CF480415 |
| DB724306 | DB710649 | CF480566 | CN126895 |
| DB724306 | DB712697 | CF480566 | CN127736 |
| DB724306 | DB721533 | CF480566 | CN128456 |
| DB724306 | DB727171 | CF480566 | CN129161 |
| DB724358 | BW692343 | CF480571 | BE918499 |
| DB724358 | DB704987 | CF480571 | CF428739 |
| DB724399 | DB686524 | CF480573 | CF489897 |
| DB724414 | DB718497 | CF480650 | CX611197 |
| DB724419 | DB726640 | CF480701 | BG047965 |
| DB724422 | DB714542 | CF480708 | CF432590 |
| DB724422 | DB727325 | CF480708 | CX607092 |
| DB724451 | DB678384 | CF480785 | BM328500 |
| DB724451 | DB709148 | CF480862 | CF480294 |

|          |          |          |          |
|----------|----------|----------|----------|
| DB724479 | DB710596 | CF480862 | CF487754 |
| DB724496 | DB706781 | CF480862 | CX606915 |
| DB724522 | DB701655 | CF480867 | CF480574 |
| DB724536 | DB710178 | CF480914 | BF657744 |
| DB724586 | DB716720 | CF480925 | AW680436 |
| DB724598 | DB713691 | CF480925 | BF420895 |
| DB724653 | DB712338 | CF480925 | BG463467 |
| DB724666 | BW690229 | CF480925 | BG464166 |
| DB724666 | DB726640 | CF480925 | BG739538 |
| DB724689 | DB704863 | CF480925 | BG947282 |
| DB724758 | DB709359 | CF480925 | BM326410 |
| DB724813 | BP879209 | CF480925 | CF430371 |
| DB724813 | BP880563 | CF480925 | CF430481 |
| DB724822 | DB715235 | CF480925 | CN125338 |
| DB724860 | DB709901 | CF480925 | CN128462 |
| DB724911 | BW690726 | CF480925 | CN129809 |
| DB725020 | DB708170 | CF480925 | CN130426 |
| DB725104 | DB692679 | CF480925 | CN131247 |
| DB725120 | DB687197 | CF480925 | CX608966 |
| DB725120 | DB719388 | CF480925 | CX609974 |
| DB725121 | BP884763 | CF480925 | CX610103 |
| DB725127 | DB701840 | CF480925 | CX610581 |
| DB725127 | DB711989 | CF480925 | CX610751 |
| DB725134 | DB726640 | CF480925 | CX612103 |
| DB725141 | DB698507 | CF480933 | BI245518 |
| DB725169 | BP884763 | CF480933 | BI245642 |
| DB725186 | DB682483 | CF480933 | CF427032 |
| DB725186 | DB721779 | CF481011 | CN125918 |
| DB725245 | DB709359 | CF481011 | CN126004 |
| DB725285 | DB714188 | CF481011 | CN127503 |
| DB725335 | DB712367 | CF481088 | CX606757 |
| DB725348 | DB709334 | CF481091 | BE360362 |
| DB725375 | DB704987 | CF481205 | CF484035 |
| DB725385 | BW687128 | CF481205 | CF486727 |
| DB725402 | DB681700 | CF481225 | AW671925 |
| DB725402 | DB708150 | CF481354 | CF489480 |
| DB725409 | DB689593 | CF481361 | BE597405 |
| DB725409 | DB715922 | CF481577 | CF485776 |
| DB725409 | DB723585 | CF481666 | BG739335 |
| DB725483 | BW689861 | CF481666 | CF427012 |
| DB725490 | DB709834 | CF481666 | CF483737 |
| DB725490 | DB712542 | CF481669 | AW284786 |
| DB725494 | DB710904 | CF482031 | CF483598 |
| DB725504 | BP877862 | CF482095 | CD462168 |
| DB725504 | BP884011 | CF482145 | CF429157 |
| DB725504 | BP884236 | CF482197 | CF433453 |
| DB725504 | BP886572 | CF482357 | CD432683 |
| DB725504 | BW688492 | CF482442 | BE364084 |
| DB725504 | DB690427 | CF482442 | BG273344 |
| DB725504 | DB708661 | CF482442 | BI245678 |
| DB725504 | DB709010 | CF482442 | CF486855 |
| DB725504 | DB712226 | CF482442 | CF487514 |

|          |          |          |          |
|----------|----------|----------|----------|
| DB725572 | DB719142 | CF482442 | CF488175 |
| DB725575 | BP884954 | CF482442 | CF489871 |
| DB725617 | DB688696 | CF482442 | CF489926 |
| DB725627 | BW692853 | CF482442 | CN124045 |
| DB725629 | DB710772 | CF482457 | CD430622 |
| DB725657 | DB711086 | CF482457 | CD463423 |
| DB725730 | DB700965 | CF482457 | CN125627 |
| DB725740 | DB707403 | CF482525 | BF656904 |
| DB725740 | DB714128 | CF482565 | CX607140 |
| DB725802 | DB687971 | CF482640 | BM325127 |
| DB725802 | DB701222 | CF482671 | CF429995 |
| DB725818 | DB697642 | CF482700 | CF486123 |
| DB725876 | DB688907 | CF482725 | CF480695 |
| DB725881 | DB722102 | CF482747 | AW286947 |
| DB725984 | BP880563 | CF482747 | CF434205 |
| DB726061 | BP886036 | CF482747 | CF480583 |
| DB726068 | DB713135 | CF482747 | CF481967 |
| DB726265 | DB710277 | CF482747 | CF483473 |
| DB726349 | DB684366 | CF482747 | CF485178 |
| DB726349 | DB688566 | CF482747 | CF485935 |
| DB726349 | DB717755 | CF482747 | CF486920 |
| DB726400 | DB720588 | CF482747 | CF487786 |
| DB726422 | DB720588 | CF482747 | CF488267 |
| DB726441 | DB710596 | CF482747 | CF489250 |
| DB726445 | DB717329 | CF482747 | CX607438 |
| DB726569 | DB685784 | CF482759 | CF480808 |
| DB726589 | DB727320 | CF482759 | CF483102 |
| DB726658 | DB688014 | CF482759 | CF483192 |
| DB726658 | DB705667 | CF482759 | CF483720 |
| DB726661 | DB701908 | CF482759 | CF484862 |
| DB726761 | DB713817 | CF482759 | CF485397 |
| DB726784 | DB717329 | CF482759 | CF485733 |
| DB726833 | DB709110 | CF482759 | CF487481 |
| DB726849 | DB709901 | CF482759 | CF488636 |
| DB726849 | DB711551 | CF482835 | CD432683 |
| DB726952 | DB725553 | CF482982 | BI211920 |
| DB726986 | DB725990 | CF482982 | CD431028 |
| DB727012 | BW687786 | CF482982 | CF070985 |
| DB727026 | DB697642 | CF482996 | CF484989 |
| DB727041 | BP884763 | CF482996 | CF489809 |
| DB727110 | DB694913 | CF483003 | CF480887 |
| DB727112 | BP909551 | CF483003 | CF481070 |
| DB727112 | BP909902 | CF483007 | CF482494 |
| DB727118 | DB719975 | CF483038 | BE598908 |
| DB727130 | DB724242 | CF483038 | CF485660 |
| DB727146 | DB701548 | CF483168 | AW287100 |
| DB727151 | BW689483 | CF483220 | BG411223 |
| DB727169 | DB713496 | CF483278 | CF480173 |
| DB727211 | DB701840 | CF483278 | CF480188 |
| DB727211 | DB711989 | CF483278 | CF480663 |
| DB727253 | DB683360 | CF483278 | CF489185 |
| DB727256 | BP900870 | CF483326 | CF483368 |

|          |          |          |          |
|----------|----------|----------|----------|
| DB727256 | BW685916 | CF483345 | CF431620 |
| DB727307 | DB716799 | CF483357 | CF480796 |
| DB727416 | DB719975 | CF483357 | CF484205 |
| DB727425 | DB685474 | CF483387 | CF486226 |
| DB727425 | DB689640 | CF483617 | CD432683 |
| DB727430 | BP881774 | CF483659 | CF484553 |
| DB727430 | BP883551 | CF483663 | CN128258 |
| DB727430 | DB702372 | CF483725 | CF483288 |
| DB727430 | DB710101 | CF483725 | CF484270 |
| DB727481 | DB714454 | CF483725 | CF487219 |
| DB727499 | BW688002 | CF483725 | CF487634 |
| DB727524 | DB685784 | CF483725 | CF487672 |
| DB727545 | DB716478 | CF483725 | CF488339 |
| DB727648 | DB702823 | CF483777 | CF479958 |
| DB727660 | DB700450 | CF483777 | CF480580 |
|          |          | CF483777 | CF482699 |
|          |          | CF483777 | CF482723 |
|          |          | CF483777 | CF482984 |
|          |          | CF483777 | CF484505 |
|          |          | CF483777 | CF484651 |
|          |          | CF483777 | CF485182 |
|          |          | CF483777 | CF486745 |
|          |          | CF483777 | CF488222 |
|          |          | CF483777 | CF488376 |
|          |          | CF483777 | CF488515 |
|          |          | CF483777 | CF488547 |
|          |          | CF483777 | CF488703 |
|          |          | CF483967 | BE367436 |
|          |          | CF483967 | BE597929 |
|          |          | CF484012 | BG464170 |
|          |          | CF484012 | BI074574 |
|          |          | CF484012 | BI098779 |
|          |          | CF484012 | BI245826 |
|          |          | CF484012 | BM323035 |
|          |          | CF484012 | BM323108 |
|          |          | CF484012 | BM326084 |
|          |          | CF484012 | CD424812 |
|          |          | CF484012 | CD426426 |
|          |          | CF484012 | CF482209 |
|          |          | CF484012 | CF484044 |
|          |          | CF484012 | CF489630 |
|          |          | CF484012 | CN128964 |
|          |          | CF484042 | CF480048 |
|          |          | CF484042 | CF483461 |
|          |          | CF484171 | BM329913 |
|          |          | CF484177 | CD432683 |
|          |          | CF484197 | BF657056 |
|          |          | CF484259 | CF429312 |
|          |          | CF484301 | AW745882 |
|          |          | CF484367 | CF486484 |
|          |          | CF484421 | CF434294 |
|          |          | CF484578 | BG048778 |

|          |          |
|----------|----------|
| CF484578 | CF489880 |
| CF484640 | BG948692 |
| CF484640 | CF073091 |
| CF484640 | CF488083 |
| CF484676 | CF480649 |
| CF484676 | CF482607 |
| CF484676 | CF486352 |
| CF484676 | CF487722 |
| CF484676 | CF488600 |
| CF484676 | CF488631 |
| CF484787 | BG241000 |
| CF484870 | CF482359 |
| CF484870 | CF482584 |
| CF484870 | CF489389 |
| CF484952 | BG557371 |
| CF484952 | BG649449 |
| CF484952 | CF483608 |
| CF484985 | BI076132 |
| CF485065 | BM326557 |
| CF485147 | CN126683 |
| CF485273 | CF433391 |
| CF485294 | CF482185 |
| CF485294 | CF486805 |
| CF485294 | CF489963 |
| CF485431 | CD463035 |
| CF485501 | CN125663 |
| CF485526 | BG739278 |
| CF485706 | CF482875 |
| CF485706 | CF484472 |
| CF485706 | CF485745 |
| CF485718 | BG556103 |
| CF485718 | CF432171 |
| CF485817 | CF480611 |
| CF485817 | CF480721 |
| CF485841 | CN130417 |
| CF485935 | CD432683 |
| CF486013 | CF486683 |
| CF486082 | CX607411 |
| CF486109 | BE598276 |
| CF486121 | BE360362 |
| CF486121 | BF657006 |
| CF486121 | BM323415 |
| CF486121 | CF481091 |
| CF486184 | CF480883 |
| CF486212 | CF483327 |
| CF486337 | CX611002 |
| CF486471 | BE364989 |
| CF486526 | CF486045 |
| CF486580 | CN124789 |
| CF486614 | CF486045 |
| CF486676 | CF431520 |
| CF486683 | CF486368 |

|          |          |
|----------|----------|
| CF486704 | CF426864 |
| CF486739 | CF482228 |
| CF486739 | CN128769 |
| CF486739 | CX611118 |
| CF486739 | CX611402 |
| CF486890 | BF657220 |
| CF486890 | CF480420 |
| CF486890 | CF480873 |
| CF486890 | CF481722 |
| CF486890 | CF482393 |
| CF486890 | CF482681 |
| CF486890 | CF482693 |
| CF486890 | CF482864 |
| CF486890 | CF483243 |
| CF486890 | CF483372 |
| CF486890 | CF483798 |
| CF486890 | CF484013 |
| CF486890 | CF484036 |
| CF486890 | CF484160 |
| CF486890 | CF484854 |
| CF486890 | CF484929 |
| CF486890 | CF485111 |
| CF486890 | CF485957 |
| CF486890 | CF486388 |
| CF486890 | CF486729 |
| CF486890 | CF486923 |
| CF486890 | CF487251 |
| CF486890 | CF487381 |
| CF486890 | CF487766 |
| CF486890 | CF488121 |
| CF486890 | CF488212 |
| CF486890 | CF488715 |
| CF486890 | CF488724 |
| CF486890 | CF489415 |
| CF486890 | CF489840 |
| CF487052 | BE917879 |
| CF487191 | CF486336 |
| CF487234 | BG322817 |
| CF487269 | CF486946 |
| CF487300 | CF484254 |
| CF487300 | CF484546 |
| CF487300 | CF484879 |
| CF487300 | CF485094 |
| CF487300 | CF490066 |
| CF487335 | CF480143 |
| CF487335 | CF482339 |
| CF487335 | CF488167 |
| CF487342 | BE358151 |
| CF487342 | CD424082 |
| CF487342 | CN124474 |
| CF487407 | AW565192 |
| CF487407 | AW922177 |



|          |          |
|----------|----------|
| CF487407 | BE597610 |
| CF487407 | BM322421 |
| CF487407 | CD430434 |
| CF487407 | CF073553 |
| CF487407 | CF488723 |
| CF487407 | CN128207 |
| CF487407 | CX608420 |
| CF487540 | BE356897 |
| CF487547 | CF484789 |
| CF487552 | CD429323 |
| CF487556 | CX611433 |
| CF487558 | CF480580 |
| CF487558 | CF483224 |
| CF487558 | CF484002 |
| CF487558 | CF484016 |
| CF487558 | CF485182 |
| CF487558 | CF485435 |
| CF487558 | CF486454 |
| CF487558 | CF486745 |
| CF487558 | CF487591 |
| CF487587 | CX608645 |
| CF487609 | CF485765 |
| CF487620 | AW924238 |
| CF487620 | BG933552 |
| CF487620 | BM324711 |
| CF487620 | CD427626 |
| CF487620 | CD432683 |
| CF487620 | CD462414 |
| CF487675 | BG357013 |
| CF487675 | CD424007 |
| CF487675 | CD424921 |
| CF487675 | CD425919 |
| CF487675 | CD461461 |
| CF487675 | CD461468 |
| CF487735 | AW285792 |
| CF487735 | AW287064 |
| CF487735 | AW678098 |
| CF487735 | BE596657 |
| CF487735 | BE599425 |
| CF487735 | BF657235 |
| CF487735 | BG412239 |
| CF487735 | BG412322 |
| CF487735 | BG412780 |
| CF487735 | BM323202 |
| CF487735 | CD429261 |
| CF487735 | CD430883 |
| CF487735 | CD432199 |
| CF487735 | CD432507 |
| CF487735 | CD462582 |
| CF487735 | CD462745 |
| CF487735 | CF433218 |
| CF487735 | CX612138 |

|          |          |
|----------|----------|
| CF487737 | CF486730 |
| CF487741 | CF485126 |
| CF487877 | BE358832 |
| CF487884 | CF488084 |
| CF487920 | CF427724 |
| CF487921 | BG158047 |
| CF487921 | BI139796 |
| CF487921 | CF433878 |
| CF487921 | CF480276 |
| CF487921 | CF485178 |
| CF487921 | CF485935 |
| CF487921 | CF487213 |
| CF487921 | CF488267 |
| CF487921 | CF488398 |
| CF487921 | CX609939 |
| CF487921 | CX611649 |
| CF488027 | BE355462 |
| CF488027 | BE367536 |
| CF488027 | BE596613 |
| CF488027 | BF657658 |
| CF488027 | BG048042 |
| CF488027 | BG463334 |
| CF488027 | CD427883 |
| CF488027 | CD429116 |
| CF488027 | CF073886 |
| CF488027 | CF429298 |
| CF488027 | CF482695 |
| CF488027 | CF487526 |
| CF488027 | CF487611 |
| CF488027 | CN124736 |
| CF488027 | CN126961 |
| CF488027 | CN128519 |
| CF488027 | CX607606 |
| CF488057 | CF488264 |
| CF488062 | CD432683 |
| CF488070 | BE357707 |
| CF488070 | BM318429 |
| CF488070 | BM318536 |
| CF488105 | CF480711 |
| CF488105 | CF480730 |
| CF488105 | CF481234 |
| CF488105 | CF481859 |
| CF488105 | CF482510 |
| CF488105 | CF483330 |
| CF488105 | CF484048 |
| CF488105 | CF485187 |
| CF488105 | CF487232 |
| CF488105 | CF488732 |
| CF488226 | CF430503 |
| CF488226 | CF432900 |
| CF488226 | CF487571 |
| CF488228 | CN127503 |

|          |          |
|----------|----------|
| CF488245 | CX609939 |
| CF488267 | CD432683 |
| CF488432 | CF485449 |
| CF488452 | BE595870 |
| CF488454 | CN131172 |
| CF488458 | CF480684 |
| CF488458 | CF480839 |
| CF488458 | CF480943 |
| CF488458 | CF488353 |
| CF488522 | AW671257 |
| CF488522 | BI075302 |
| CF488549 | CF480248 |
| CF488549 | CF487377 |
| CF488735 | CF487274 |
| CF488736 | BI074689 |
| CF488861 | CF483815 |
| CF488995 | CF480913 |
| CF488995 | CF482549 |
| CF488995 | CF483247 |
| CF488995 | CF484327 |
| CF488995 | CF484620 |
| CF488995 | CF484958 |
| CF488995 | CF485180 |
| CF488995 | CF485625 |
| CF488995 | CF486777 |
| CF488995 | CF488209 |
| CF488995 | CF488255 |
| CF488995 | CF488579 |
| CF488995 | CF489424 |
| CF489046 | CX609849 |
| CF489117 | BF657729 |
| CF489117 | CF485772 |
| CF489117 | CF487375 |
| CF489117 | CF488741 |
| CF489117 | CX606208 |
| CF489138 | BE362657 |
| CF489138 | BE367149 |
| CF489138 | BE596370 |
| CF489138 | BE600871 |
| CF489138 | BG557392 |
| CF489138 | BG947116 |
| CF489138 | CD462058 |
| CF489138 | CF073829 |
| CF489138 | CX606581 |
| CF489201 | BM327719 |
| CF489291 | CF433522 |
| CF489422 | CF484527 |
| CF489456 | CD432561 |
| CF489489 | CF484515 |
| CF489525 | BG240120 |
| CF489525 | BI212003 |
| CF489525 | CD432471 |

|          |          |
|----------|----------|
| CF489525 | CF432676 |
| CF489525 | CF481818 |
| CF489581 | CD432386 |
| CF489581 | CD432832 |
| CF489581 | CF486911 |
| CF489594 | BG101747 |
| CF489599 | CF489923 |
| CF489642 | CF480999 |
| CF489651 | CF486484 |
| CF489691 | CF485061 |
| CF489691 | CF487866 |
| CF489691 | CF488453 |
| CF489761 | AW286874 |
| CF489761 | BM323057 |
| CF489776 | CF488824 |
| CF489967 | BE592439 |
| CF489967 | CD429868 |
| CF489967 | CF487002 |
| CF489967 | CN123846 |
| CF489967 | CN123892 |
| CF489991 | BG357082 |
| CF489991 | CF480213 |
| CF489991 | CF480420 |
| CF489991 | CF480759 |
| CF489991 | CF482737 |
| CF489991 | CF483492 |
| CF489991 | CF483749 |
| CF489991 | CF484036 |
| CF489991 | CF485154 |
| CF489991 | CF485806 |
| CF489991 | CF486399 |
| CF489991 | CF486955 |
| CF489991 | CF487561 |
| CF489991 | CF487613 |
| CF489991 | CF487766 |
| CF489991 | CF488683 |
| CF489991 | CF488822 |
| CF489991 | CF489306 |
| CF489991 | CF489415 |
| CF489991 | CF489452 |
| CF489991 | CF489590 |
| CF489991 | CF489970 |
| CF490091 | BE595420 |
| CN123824 | BM323243 |
| CN123837 | BM318308 |
| CN123852 | CD429699 |
| CN123864 | BG411940 |
| CN123910 | BE363995 |
| CN123910 | CX611993 |
| CN123914 | CF429109 |
| CN123956 | BI246025 |
| CN124024 | CF429206 |

|          |          |
|----------|----------|
| CN124060 | CF483337 |
| CN124087 | CD430414 |
| CN124087 | CD431248 |
| CN124087 | CD464112 |
| CN124087 | CX608754 |
| CN124154 | BG465411 |
| CN124154 | CF489543 |
| CN124154 | CN125445 |
| CN124154 | CN130920 |
| CN124168 | BM318217 |
| CN124202 | BG158307 |
| CN124202 | CX607881 |
| CN124202 | CX612057 |
| CN124229 | CD428745 |
| CN124229 | CX607318 |
| CN124233 | CX607565 |
| CN124263 | CF485593 |
| CN124263 | CN127513 |
| CN124279 | AW565032 |
| CN124279 | CD428621 |
| CN124279 | CF428921 |
| CN124317 | CX610209 |
| CN124433 | CN130919 |
| CN124523 | BM318217 |
| CN124563 | CF427626 |
| CN124563 | CF427936 |
| CN124563 | CF428917 |
| CN124563 | CF429112 |
| CN124563 | CF429982 |
| CN124563 | CX606575 |
| CN124572 | BE600827 |
| CN124572 | CX606237 |
| CN124572 | CX607312 |
| CN124646 | BM318217 |
| CN124723 | BM328500 |
| CN124805 | CN129553 |
| CN124805 | CX612075 |
| CN124819 | BG053996 |
| CN124819 | CD425942 |
| CN124823 | AW285447 |
| CN124833 | AW680730 |
| CN124833 | CF429878 |
| CN124833 | CF430530 |
| CN124833 | CN129108 |
| CN124833 | CX609839 |
| CN124833 | CX611004 |
| CN124841 | BF656904 |
| CN124877 | CF428063 |
| CN124894 | BE595203 |
| CN124894 | BM322462 |
| CN124894 | BM323497 |
| CN124894 | CD427970 |

|          |          |
|----------|----------|
| CN124894 | CF433176 |
| CN124894 | CF433902 |
| CN124894 | CX610121 |
| CN124894 | CX610298 |
| CN124907 | BE594797 |
| CN124907 | CF430021 |
| CN124907 | CN129108 |
| CN124907 | CX611091 |
| CN124979 | AW746639 |
| CN124979 | BE594070 |
| CN124979 | CN127362 |
| CN124979 | CN129911 |
| CN125034 | BG557802 |
| CN125034 | BI140963 |
| CN125049 | BE361906 |
| CN125049 | BG240528 |
| CN125049 | CF432546 |
| CN125049 | CF432766 |
| CN125049 | CF487099 |
| CN125049 | CN126895 |
| CN125049 | CN127736 |
| CN125063 | CN123901 |
| CN125121 | BE355742 |
| CN125121 | BE356968 |
| CN125121 | CF434128 |
| CN125121 | CN124156 |
| CN125121 | CX609314 |
| CN125153 | CX610209 |
| CN125204 | CN130598 |
| CN125221 | CN130155 |
| CN125221 | CX607066 |
| CN125256 | BE358798 |
| CN125256 | BE358885 |
| CN125339 | CF432420 |
| CN125343 | BE358885 |
| CN125378 | AW287178 |
| CN125378 | AW564557 |
| CN125378 | AW671552 |
| CN125378 | BE358314 |
| CN125378 | BE358773 |
| CN125378 | CD462722 |
| CN125378 | CN126694 |
| CN125499 | AW677494 |
| CN125499 | CF429994 |
| CN125499 | CN131041 |
| CN125606 | CD431370 |
| CN125606 | CF480226 |
| CN125606 | CN129089 |
| CN125645 | BM328500 |
| CN125676 | AW680348 |
| CN125676 | CF072621 |
| CN125676 | CF073939 |

|          |          |
|----------|----------|
| CN125709 | CN125679 |
| CN125709 | CX606559 |
| CN125765 | BG356673 |
| CN125778 | CN124219 |
| CN125784 | CX607854 |
| CN125795 | AW679720 |
| CN125795 | BF177086 |
| CN125795 | BM326102 |
| CN125795 | CX606813 |
| CN125820 | BE354953 |
| CN125824 | CF484064 |
| CN125840 | BG487482 |
| CN125842 | BM326493 |
| CN125846 | CD463035 |
| CN125859 | BM328500 |
| CN126002 | CN128323 |
| CN126056 | CN124888 |
| CN126076 | CX611043 |
| CN126167 | CX607572 |
| CN126167 | CX608234 |
| CN126187 | CX606767 |
| CN126191 | CD426261 |
| CN126191 | CF430650 |
| CN126191 | CN130172 |
| CN126191 | CX610945 |
| CN126248 | CN129985 |
| CN126274 | CN126893 |
| CN126283 | CF428063 |
| CN126283 | CN129553 |
| CN126283 | CX609207 |
| CN126286 | BM327719 |
| CN126331 | BE917879 |
| CN126331 | CD428256 |
| CN126331 | CN129985 |
| CN126363 | AW677094 |
| CN126363 | BE355841 |
| CN126363 | BG556795 |
| CN126363 | CF431910 |
| CN126375 | CD427965 |
| CN126435 | BG054104 |
| CN126467 | CD462949 |
| CN126518 | CN127556 |
| CN126529 | CD425105 |
| CN126529 | CF430652 |
| CN126529 | CN128642 |
| CN126529 | CX607276 |
| CN126529 | CX609438 |
| CN126529 | CX610128 |
| CN126551 | CF431607 |
| CN126621 | AW680811 |
| CN126622 | CD430346 |
| CN126656 | CX611421 |

|          |          |
|----------|----------|
| CN126671 | CD426849 |
| CN126671 | CF433377 |
| CN126702 | BE597657 |
| CN126756 | CF070728 |
| CN126777 | AW287402 |
| CN126836 | CN128825 |
| CN126960 | BE918317 |
| CN126960 | CF071125 |
| CN126960 | CF071221 |
| CN126960 | CF481440 |
| CN126960 | CF489573 |
| CN127024 | CF488109 |
| CN127095 | AW681115 |
| CN127095 | CF429635 |
| CN127095 | CF433743 |
| CN127126 | CF480100 |
| CN127156 | AW671362 |
| CN127156 | BE125848 |
| CN127156 | BE355378 |
| CN127156 | BE355562 |
| CN127156 | BE355815 |
| CN127156 | BE356089 |
| CN127156 | BE356301 |
| CN127156 | BE356557 |
| CN127156 | BE357243 |
| CN127156 | BE357474 |
| CN127156 | BE358611 |
| CN127156 | BE359022 |
| CN127156 | BE359673 |
| CN127156 | BE361157 |
| CN127156 | BE363068 |
| CN127156 | BE366175 |
| CN127156 | BE367482 |
| CN127156 | BE599939 |
| CN127156 | BG411273 |
| CN127156 | BG411291 |
| CN127156 | BG412838 |
| CN127156 | BG464316 |
| CN127156 | BG947809 |
| CN127156 | BG947819 |
| CN127156 | BG948831 |
| CN127156 | CF427781 |
| CN127156 | CF431186 |
| CN127156 | CF432594 |
| CN127156 | CN128018 |
| CN127156 | CN129478 |
| CN127156 | CN129660 |
| CN127165 | AW671010 |
| CN127165 | BE357133 |
| CN127165 | CD431391 |
| CN127165 | CF483802 |
| CN127165 | CX606522 |



|          |          |
|----------|----------|
| CN127172 | CF432590 |
| CN127172 | CF483654 |
| CN127172 | CX607092 |
| CN127172 | CX610761 |
| CN127181 | CD427024 |
| CN127181 | CD428480 |
| CN127181 | CD462559 |
| CN127181 | CN124475 |
| CN127199 | CN126653 |
| CN127238 | AW282821 |
| CN127238 | BI099425 |
| CN127238 | CF427166 |
| CN127238 | CF480279 |
| CN127289 | BG556364 |
| CN127408 | CN125494 |
| CN127475 | CN127298 |
| CN127487 | CD429238 |
| CN127487 | CF427042 |
| CN127487 | CN125266 |
| CN127487 | CX608021 |
| CN127519 | BE917879 |
| CN127534 | CF481370 |
| CN127534 | CF482739 |
| CN127568 | CX606353 |
| CN127582 | BE594059 |
| CN127597 | CD429699 |
| CN127597 | CN125985 |
| CN127597 | CN129509 |
| CN127614 | BE363092 |
| CN127672 | CX609485 |
| CN127716 | CD424558 |
| CN127762 | CX607307 |
| CN127767 | CX608718 |
| CN127773 | BE366512 |
| CN127773 | BF656749 |
| CN127773 | BM331596 |
| CN127791 | CX607675 |
| CN127890 | CF487546 |
| CN127906 | BE595420 |
| CN127906 | CN127053 |
| CN127906 | CN128820 |
| CN127915 | BG487560 |
| CN127926 | BM328500 |
| CN128007 | CN125179 |
| CN128007 | CN130807 |
| CN128062 | BI212015 |
| CN128252 | CN127710 |
| CN128252 | CN131359 |
| CN128319 | CF430530 |
| CN128319 | CN127710 |
| CN128319 | CN131359 |
| CN128327 | CF484064 |

|          |          |
|----------|----------|
| CN128335 | BE363091 |
| CN128337 | CX608582 |
| CN128387 | AW677270 |
| CN128387 | AW679986 |
| CN128387 | AW745729 |
| CN128387 | AW745817 |
| CN128387 | BE356633 |
| CN128387 | BE366759 |
| CN128387 | BE592699 |
| CN128387 | BG239884 |
| CN128387 | BG410965 |
| CN128387 | BG412542 |
| CN128387 | CD428912 |
| CN128387 | CD463890 |
| CN128387 | CN129612 |
| CN128387 | CN131298 |
| CN128387 | CX609822 |
| CN128387 | CX609843 |
| CN128407 | AW678558 |
| CN128407 | AW745303 |
| CN128407 | BE360481 |
| CN128407 | BG048535 |
| CN128407 | BG464435 |
| CN128407 | CD462956 |
| CN128407 | CF071730 |
| CN128407 | CF488601 |
| CN128407 | CN124874 |
| CN128407 | CN128518 |
| CN128407 | CN128895 |
| CN128407 | CX609504 |
| CN128437 | CX607289 |
| CN128450 | CF480243 |
| CN128464 | AW677270 |
| CN128464 | AW679986 |
| CN128464 | AW745729 |
| CN128464 | AW745817 |
| CN128464 | BE366759 |
| CN128464 | BE592699 |
| CN128464 | BG239884 |
| CN128464 | CD428912 |
| CN128464 | CD463890 |
| CN128464 | CN129612 |
| CN128464 | CN131298 |
| CN128464 | CX609822 |
| CN128464 | CX609843 |
| CN128477 | BG464355 |
| CN128480 | CX609440 |
| CN128490 | CN127536 |
| CN128493 | CF484064 |
| CN128496 | BG411708 |
| CN128496 | BM327276 |
| CN128496 | CX607518 |

|          |          |
|----------|----------|
| CN128552 | CX610209 |
| CN128592 | CD462378 |
| CN128600 | AW677644 |
| CN128600 | AW678641 |
| CN128600 | AW678764 |
| CN128600 | AW923910 |
| CN128600 | BE366818 |
| CN128600 | BE592919 |
| CN128600 | CD425686 |
| CN128600 | CF430777 |
| CN128600 | CN125108 |
| CN128600 | CN130455 |
| CN128632 | CD430454 |
| CN128672 | AW745087 |
| CN128672 | CF486295 |
| CN128727 | BE595206 |
| CN128727 | BE600039 |
| CN128727 | CX606680 |
| CN128795 | CN128960 |
| CN128796 | CX611421 |
| CN128800 | CX608256 |
| CN128827 | BG739544 |
| CN128827 | BM322490 |
| CN128827 | CD428724 |
| CN128827 | CF428638 |
| CN128836 | BM325258 |
| CN128837 | BG273507 |
| CN128837 | BM326493 |
| CN128840 | CN127098 |
| CN128840 | CN130238 |
| CN128850 | CD429699 |
| CN128863 | BE125749 |
| CN128884 | CX607037 |
| CN128884 | CX609508 |
| CN128898 | CD462510 |
| CN128900 | BM318217 |
| CN128931 | BM322387 |
| CN128968 | BM328500 |
| CN129015 | AW565711 |
| CN129015 | BE355493 |
| CN129015 | BE597095 |
| CN129015 | CN124666 |
| CN129098 | CN128920 |
| CN129099 | AW746076 |
| CN129190 | BE360949 |
| CN129232 | CN126800 |
| CN129271 | AW677767 |
| CN129271 | BM324661 |
| CN129271 | CD432062 |
| CN129271 | CN127581 |
| CN129314 | BG240143 |
| CN129318 | AW564074 |

|          |          |
|----------|----------|
| CN129318 | BG947877 |
| CN129321 | AW285894 |
| CN129321 | AW286136 |
| CN129321 | AW286940 |
| CN129321 | AW564510 |
| CN129321 | AW671025 |
| CN129321 | AW671525 |
| CN129321 | AW744884 |
| CN129321 | BE125739 |
| CN129321 | BE125887 |
| CN129321 | BE359342 |
| CN129321 | BF177145 |
| CN129321 | BG355424 |
| CN129321 | BG946971 |
| CN129321 | BG948607 |
| CN129321 | BG948760 |
| CN129321 | BI075998 |
| CN129321 | BI076253 |
| CN129321 | BI098932 |
| CN129321 | BI140061 |
| CN129321 | BI211277 |
| CN129321 | BI211283 |
| CN129321 | BI245898 |
| CN129321 | BI246040 |
| CN129321 | BI246142 |
| CN129321 | CF427446 |
| CN129321 | CF430687 |
| CN129321 | CF431340 |
| CN129321 | CF431904 |
| CN129321 | CF433823 |
| CN129321 | CF434211 |
| CN129321 | CF485752 |
| CN129321 | CN124304 |
| CN129321 | CN127349 |
| CN129382 | CN128405 |
| CN129429 | BE367281 |
| CN129429 | BE597038 |
| CN129436 | CN124928 |
| CN129436 | CN129440 |
| CN129436 | CX608464 |
| CN129436 | CX611767 |
| CN129446 | CF489649 |
| CN129463 | BE356681 |
| CN129463 | CF427904 |
| CN129526 | AW287222 |
| CN129526 | AW924987 |
| CN129526 | AW925062 |
| CN129526 | BE600040 |
| CN129526 | BE600168 |
| CN129526 | BF176800 |
| CN129526 | BG322716 |
| CN129526 | BG322973 |

|          |          |
|----------|----------|
| CN129526 | BM318115 |
| CN129526 | CF071020 |
| CN129526 | CF071149 |
| CN129526 | CF480092 |
| CN129526 | CF481760 |
| CN129526 | CF482267 |
| CN129526 | CF482433 |
| CN129526 | CF486101 |
| CN129526 | CN124147 |
| CN129526 | CN124602 |
| CN129526 | CN125649 |
| CN129526 | CN125717 |
| CN129526 | CN125770 |
| CN129526 | CN127123 |
| CN129526 | CN127138 |
| CN129526 | CN128073 |
| CN129526 | CN128305 |
| CN129526 | CN129615 |
| CN129526 | CN130017 |
| CN129526 | CN130070 |
| CN129526 | CN130146 |
| CN129526 | CN130147 |
| CN129526 | CX608218 |
| CN129526 | CX609055 |
| CN129526 | CX610359 |
| CN129528 | AW286940 |
| CN129528 | AW671525 |
| CN129528 | AW744884 |
| CN129528 | BE125739 |
| CN129528 | BE359342 |
| CN129528 | BG355424 |
| CN129528 | BG946971 |
| CN129528 | BG948607 |
| CN129528 | BI076253 |
| CN129528 | BI098932 |
| CN129528 | BI140061 |
| CN129528 | BI246142 |
| CN129528 | CF431340 |
| CN129528 | CF433823 |
| CN129528 | CF434211 |
| CN129528 | CF485752 |
| CN129528 | CN124304 |
| CN129528 | CN127349 |
| CN129528 | CX606560 |
| CN129547 | CF429902 |
| CN129627 | BM330757 |
| CN129823 | CD429323 |
| CN129851 | CF428063 |
| CN129890 | CN130080 |
| CN130035 | BE596998 |
| CN130035 | BE601006 |
| CN130117 | CF481559 |

|          |          |
|----------|----------|
| CN130120 | BG159641 |
| CN130120 | BG487489 |
| CN130120 | CN130636 |
| CN130120 | CX609616 |
| CN130120 | CX609782 |
| CN130120 | CX609968 |
| CN130286 | CD430591 |
| CN130349 | BG411320 |
| CN130547 | CF487546 |
| CN130567 | CD429699 |
| CN130591 | BE598970 |
| CN130591 | CF432713 |
| CN130611 | AW286940 |
| CN130611 | AW671525 |
| CN130611 | AW744884 |
| CN130611 | BE125739 |
| CN130611 | BE359342 |
| CN130611 | BG355424 |
| CN130611 | BG946971 |
| CN130611 | BG948607 |
| CN130611 | BI076253 |
| CN130611 | BI098932 |
| CN130611 | BI140061 |
| CN130611 | BI246142 |
| CN130611 | CF431340 |
| CN130611 | CF433823 |
| CN130611 | CF434211 |
| CN130611 | CF485752 |
| CN130611 | CN124304 |
| CN130611 | CN127349 |
| CN130611 | CN129459 |
| CN130611 | CX606560 |
| CN130624 | CF487546 |
| CN130689 | CN127611 |
| CN130732 | CD463343 |
| CN130753 | CD461572 |
| CN130753 | CX608858 |
| CN130753 | CX612027 |
| CN130788 | CX610404 |
| CN130803 | BM325306 |
| CN130898 | BE125239 |
| CN130898 | BI211229 |
| CN130898 | CF488277 |
| CN130898 | CN125351 |
| CN130898 | CX608073 |
| CN130913 | CD429596 |
| CN130918 | AW924341 |
| CN130918 | BE596501 |
| CN130918 | BG054400 |
| CN130918 | BG241064 |
| CN130918 | BG412853 |
| CN130918 | BG463590 |

|          |          |
|----------|----------|
| CN130918 | BG649457 |
| CN130918 | BI074566 |
| CN130918 | BI098455 |
| CN130918 | BI141117 |
| CN130918 | BM323069 |
| CN130918 | BM323442 |
| CN130918 | BM323671 |
| CN130918 | BM324421 |
| CN130918 | BM324816 |
| CN130918 | BM325711 |
| CN130918 | CF429989 |
| CN130918 | CF430030 |
| CN130918 | CF430478 |
| CN130918 | CX607274 |
| CN130918 | CX612134 |
| CN131111 | CN123976 |
| CN131135 | AW287668 |
| CN131135 | AW677289 |
| CN131135 | AW678699 |
| CN131135 | AW745340 |
| CN131135 | BE601007 |
| CN131135 | CD428141 |
| CN131220 | AW677289 |
| CN131220 | BE601007 |
| CN131220 | BG047849 |
| CN131220 | BM326443 |
| CN131239 | CD426814 |
| CN131239 | CF480742 |
| CN131239 | CF482203 |
| CN131239 | CF485593 |
| CN131239 | CN128760 |
| CN131239 | CN130172 |
| CN131239 | CX609610 |
| CN131252 | CF432590 |
| CN131252 | CX610761 |
| CN131270 | BE600810 |
| CN131279 | CD429699 |
| CN131285 | AW563837 |
| CN131296 | CD427770 |
| CN131296 | CD463994 |
| CN131296 | CN124171 |
| CN131296 | CN124309 |
| CN131296 | CN126470 |
| CN131296 | CN130661 |
| CN131296 | CN130867 |
| CN131309 | BE367281 |
| CN131309 | BE597038 |
| CN131333 | CN128326 |
| CN131334 | BM328500 |
| CN131335 | CN125754 |
| CN131371 | CD463994 |
| CN131371 | CN126554 |

|          |          |
|----------|----------|
| CN131371 | CN130867 |
| CN131401 | CN128326 |
| CN131480 | BG410709 |
| CN131495 | CN124888 |
| CN131501 | BI076132 |
| CN131507 | AW745786 |
| CN131507 | BE359308 |
| CN131507 | BE601012 |
| CX606291 | AW678310 |
| CX606605 | BE595528 |
| CX606700 | BE356129 |
| CX606700 | CN126516 |
| CX606700 | CX606092 |
| CX606700 | CX606267 |
| CX606700 | CX606375 |
| CX606700 | CX607198 |
| CX606700 | CX607317 |
| CX606700 | CX608472 |
| CX606700 | CX608733 |
| CX606700 | CX608739 |
| CX606700 | CX608923 |
| CX606700 | CX609411 |
| CX606700 | CX609847 |
| CX606700 | CX610197 |
| CX606700 | CX610223 |
| CX606700 | CX610730 |
| CX606700 | CX610791 |
| CX606700 | CX610880 |
| CX606700 | CX611351 |
| CX606700 | CX611440 |
| CX606700 | CX611481 |
| CX606700 | CX611531 |
| CX606700 | CX611548 |
| CX606700 | CX611750 |
| CX606700 | CX611974 |
| CX606700 | CX612003 |
| CX606700 | CX612085 |
| CX606700 | CX612094 |
| CX606760 | AW286068 |
| CX606937 | BE598965 |
| CX607078 | CX611848 |
| CX607263 | BM323415 |
| CX607271 | CN124428 |
| CX607320 | BE358696 |
| CX607320 | CF074064 |
| CX607520 | CF429235 |
| CX607567 | CN124888 |
| CX607604 | BI074669 |
| CX607985 | CX610209 |
| CX608192 | AW678310 |
| CX608221 | CX610209 |
| CX608245 | CD432683 |



|          |          |
|----------|----------|
| CX608274 | CF428063 |
| CX608372 | CX610209 |
| CX608631 | AW678310 |
| CX608686 | BM318217 |
| CX608751 | BE595243 |
| CX608913 | AW285894 |
| CX608913 | AW286136 |
| CX608913 | AW564510 |
| CX608913 | AW671025 |
| CX608913 | BE125887 |
| CX608913 | BG948760 |
| CX608913 | BI075998 |
| CX608913 | BI211277 |
| CX608913 | BI245898 |
| CX608913 | BI246040 |
| CX608913 | CF427446 |
| CX608913 | CF430687 |
| CX608913 | CN127349 |
| CX608918 | AW286136 |
| CX608918 | AW564510 |
| CX608918 | AW564867 |
| CX608918 | AW671025 |
| CX608918 | BG947995 |
| CX608918 | BG948468 |
| CX608918 | BG948760 |
| CX608918 | BI075997 |
| CX608918 | BI211277 |
| CX608918 | BI245898 |
| CX608918 | BI246040 |
| CX608918 | CF430687 |
| CX608918 | CN127349 |
| CX608930 | CF074455 |
| CX609020 | BG356673 |
| CX609188 | BG356673 |
| CX609190 | CD423107 |
| CX609190 | CF071023 |
| CX609190 | CF071073 |
| CX609269 | AW564867 |
| CX609269 | BE125689 |
| CX609269 | BE358341 |
| CX609269 | BF177145 |
| CX609269 | BG947995 |
| CX609269 | BG948468 |
| CX609269 | BG948760 |
| CX609269 | BI075388 |
| CX609269 | BI075807 |
| CX609269 | BI075997 |
| CX609269 | BI098932 |
| CX609269 | BI211277 |
| CX609269 | BI246040 |
| CX609269 | CD431264 |
| CX609269 | CF427446 |

|          |          |
|----------|----------|
| CX609269 | CF431340 |
| CX609269 | CF431717 |
| CX609269 | CN124304 |
| CX609269 | CX608143 |
| CX609269 | CX611436 |
| CX609292 | CF428063 |
| CX609469 | CF430193 |
| CX609472 | CF428063 |
| CX609526 | CX610064 |
| CX609571 | AW679012 |
| CX609582 | AW285447 |
| CX609666 | BE595528 |
| CX609666 | BM318308 |
| CX609688 | AW922782 |
| CX609688 | BE358591 |
| CX609688 | BG240996 |
| CX609688 | BG241309 |
| CX609688 | BG412521 |
| CX609688 | CF431863 |
| CX609688 | CN130056 |
| CX609688 | CX608657 |
| CX609729 | BM318217 |
| CX609948 | CF434294 |
| CX609993 | BG739379 |
| CX610015 | BG240984 |
| CX610015 | BG241309 |
| CX610015 | BG412521 |
| CX610015 | CN128554 |
| CX610015 | CX608190 |
| CX610015 | CX608865 |
| CX610015 | CX611206 |
| CX610015 | CX611881 |
| CX610043 | CD423570 |
| CX610222 | AW285155 |
| CX610222 | CD432349 |
| CX610246 | BE600810 |
| CX610284 | CF434339 |
| CX610305 | CX607110 |
| CX610308 | AW680261 |
| CX610308 | AW680770 |
| CX610308 | BG048419 |
| CX610308 | BG240857 |
| CX610560 | AW678310 |
| CX610591 | AW286940 |
| CX610591 | AW671525 |
| CX610591 | AW744884 |
| CX610591 | BE125739 |
| CX610591 | BE359342 |
| CX610591 | BG355424 |
| CX610591 | BG946971 |
| CX610591 | BG948607 |
| CX610591 | BI076253 |

|          |          |
|----------|----------|
| CX610591 | BI098932 |
| CX610591 | BI140061 |
| CX610591 | BI246142 |
| CX610591 | CF431340 |
| CX610591 | CF433823 |
| CX610591 | CF434211 |
| CX610591 | CF485752 |
| CX610591 | CN127349 |
| CX610591 | CN129459 |
| CX610591 | CN130454 |
| CX610591 | CX606528 |
| CX610591 | CX606560 |
| CX610591 | CX606947 |
| CX610617 | CF433453 |
| CX610838 | BM330474 |
| CX610896 | AW286940 |
| CX610896 | AW671525 |
| CX610896 | AW744884 |
| CX610896 | BE125689 |
| CX610896 | BE125739 |
| CX610896 | BE359342 |
| CX610896 | BF177145 |
| CX610896 | BF657141 |
| CX610896 | BG355424 |
| CX610896 | BG357888 |
| CX610896 | BG463890 |
| CX610896 | BG946971 |
| CX610896 | BG947296 |
| CX610896 | BG947799 |
| CX610896 | BG947931 |
| CX610896 | BG948468 |
| CX610896 | BG948607 |
| CX610896 | BG948760 |
| CX610896 | BI076216 |
| CX610896 | BI076253 |
| CX610896 | BI098932 |
| CX610896 | BI140061 |
| CX610896 | BI140447 |
| CX610896 | BI211819 |
| CX610896 | BI246142 |
| CX610896 | CF430529 |
| CX610896 | CF431340 |
| CX610896 | CF433823 |
| CX610896 | CF485752 |
| CX610896 | CN124304 |
| CX610896 | CN127349 |
| CX610896 | CN128992 |
| CX610896 | CN129459 |
| CX610896 | CN130437 |
| CX610896 | CN130454 |
| CX610896 | CX606528 |
| CX610896 | CX606560 |

|          |          |
|----------|----------|
| CX610896 | CX606947 |
| CX610896 | CX607909 |
| CX610896 | CX609258 |
| CX610899 | CD463035 |
| CX611017 | BG410915 |
| CX611017 | BI139666 |
| CX611017 | BM328374 |
| CX611017 | CD424254 |
| CX611017 | CF488806 |
| CX611018 | CX610209 |
| CX611078 | BG355452 |
| CX611078 | CF429677 |
| CX611120 | AW285894 |
| CX611120 | AW286136 |
| CX611120 | AW564510 |
| CX611120 | AW671025 |
| CX611120 | BE125887 |
| CX611120 | BF177145 |
| CX611120 | BG948760 |
| CX611120 | BI075998 |
| CX611120 | BI211277 |
| CX611120 | BI245898 |
| CX611120 | BI246040 |
| CX611120 | CF427446 |
| CX611120 | CF430687 |
| CX611120 | CF431904 |
| CX611120 | CN127349 |
| CX611120 | CN128992 |
| CX611120 | CN129459 |
| CX611120 | CX610743 |
| CX611120 | CX611300 |
| CX611120 | CX612090 |
| CX611177 | CX610209 |
| CX611193 | CN130221 |
| CX611291 | AW678310 |
| CX611328 | BE599923 |
| CX611345 | CD428495 |
| CX611350 | BG464206 |
| CX611562 | BE599923 |
| CX611649 | CD432683 |
| CX611659 | AW285447 |
| CX611827 | CN126399 |
| CX611855 | CX608718 |
| CX611855 | CX610064 |
| CX611879 | CX608718 |
| CX611914 | CN126399 |
| CX611926 | BF656904 |
| CX612069 | CD430454 |
| CX612080 | CX610209 |
| CX612148 | BG158277 |
| CX612164 | CF428063 |
| EB724817 | BG355497 |

|          |          |
|----------|----------|
| EB724817 | BG464688 |
| EB725040 | CD429640 |
| EB725110 | BE594348 |
| EB725141 | EB725157 |
| EB725753 | EB725673 |
