# Supplementary material
Source: PubMed Central journal article supplement (PMC1914131)
Supplement: plntphys_pp.107.098640_3.pdf [file plntphys_pp.107.098640_3.pdf]

Table S3: clusters and AS pairs results obtained from using 6 samples of 20,000 ESTs each.

|                    |               | all clusters | clusters with more than 1 EST | AS pairs | AS clusters | AS rate | average AS rate (std) | average clusters |
|--------------------|---------------|--------------|-------------------------------|----------|-------------|---------|-----------------------|------------------|
| <i>eudicot</i>     | strain        |              |                               |          |             |         |                       |                  |
| <i>Arabidopsis</i> | columbia      | 10493        | 2736                          | 265      | 52          | 1.90    | 1.94 (0.14)           | 2751             |
| <i>thaliana</i>    |               | 10346        | 2742                          | 190      | 53          | 1.93    |                       |                  |
|                    |               | 10316        | 2754                          | 255      | 51          | 1.85    |                       |                  |
|                    |               | 10370        | 2772                          | 275      | 51          | 1.84    |                       |                  |
|                    |               | 10503        | 2760                          | 229      | 52          | 1.88    |                       |                  |
|                    |               | 10373        | 2742                          | 359      | 61          | 2.22    |                       |                  |
| <i>Arabidopsis</i> | wassilewskija | 6570         | 2474                          | 537      | 67          | 2.71    | 2.74 (0.23)           | 2522             |
| <i>thaliana</i>    |               | 6490         | 2591                          | 447      | 68          | 2.62    |                       |                  |
|                    |               | 6500         | 2525                          | 383      | 62          | 2.46    |                       |                  |
|                    |               | 6494         | 2519                          | 676      | 75          | 2.98    |                       |                  |
|                    |               | 6538         | 2511                          | 489      | 77          | 3.07    |                       |                  |
|                    |               | 6426         | 2511                          | 428      | 66          | 2.63    |                       |                  |
| <i>Lotus</i>       | gifu b-129    | 9158         | 2673                          | 1333     | 86          | 3.22    | 3.45 (0.31)           | 2717             |
| <i>japonicus</i>   |               | 9012         | 2753                          | 882      | 90          | 3.27    |                       |                  |
|                    |               | 9094         | 2733                          | 823      | 101         | 3.70    |                       |                  |
|                    |               | 9013         | 2701                          | 686      | 94          | 3.48    |                       |                  |
|                    |               | 9084         | 2739                          | 1578     | 107         | 3.91    |                       |                  |
|                    |               | 8998         | 2704                          | 936      | 84          | 3.11    |                       |                  |
| <i>Lotus</i>       | miyakojima    | 9482         | 3048                          | 212      | 54          | 1.77    | 1.91 (0.22)           | 3023             |
| <i>japonicus</i>   | mg-20         | 9543         | 3045                          | 221      | 66          | 2.17    |                       |                  |
|                    |               | 9539         | 2983                          | 253      | 58          | 1.94    |                       |                  |
|                    |               | 9541         | 3012                          | 159      | 62          | 2.06    |                       |                  |
|                    |               | 9568         | 3033                          | 173      | 47          | 1.55    |                       |                  |
|                    |               | 9438         | 3014                          | 197      | 59          | 1.96    |                       |                  |
| <i>Medicago</i>    | a17           | 9863         | 3372                          | 563      | 157         | 4.66    | 4.63 (0.33)           | 3369             |
| <i>truncatula</i>  |               | 9861         | 3371                          | 591      | 146         | 4.33    |                       |                  |
|                    |               | 9794         | 3367                          | 577      | 152         | 4.51    |                       |                  |
|                    |               | 9874         | 3359                          | 622      | 148         | 4.41    |                       |                  |
|                    |               | 9893         | 3414                          | 706      | 158         | 4.63    |                       |                  |
|                    |               | 9871         | 3330                          | 702      | 175         | 5.26    |                       |                  |
| <i>Malus</i>       | goldrush      | 11524        | 3358                          | 348      | 154         | 4.59    | 4.46 (0.23)           | 3373             |
| <i>domestica</i>   |               | 11610        | 3376                          | 339      | 152         | 4.50    |                       |                  |
|                    |               | 11577        | 3399                          | 349      | 151         | 4.44    |                       |                  |
|                    |               | 11563        | 3399                          | 393      | 141         | 4.15    |                       |                  |
|                    |               | 11654        | 3324                          | 358      | 160         | 4.81    |                       |                  |
|                    |               | 11524        | 3381                          | 305      | 145         | 4.29    |                       |                  |
| <i>Malus</i>       | royal gala    | 9673         | 2783                          | 870      | 117         | 4.20    | 4.55 (0.25)           | 2799             |
| <i>domestica</i>   |               | 9583         | 2805                          | 687      | 138         | 4.92    |                       |                  |
|                    |               | 9569         | 2797                          | 938      | 131         | 4.68    |                       |                  |
|                    |               | 9579         | 2819                          | 1050     | 123         | 4.36    |                       |                  |
|                    |               | 9671         | 2842                          | 734      | 132         | 4.64    |                       |                  |
|                    |               | 9642         | 2749                          | 975      | 123         | 4.47    |                       |                  |
| <i>Glycine</i>     | williams      | 10754        | 2530                          | 673      | 153         | 6.05    | 6.04 (0.44)           | 2492             |
| <i>max</i>         |               | 10852        | 2496                          | 486      | 153         | 6.13    |                       |                  |

|                     |             |       |      |      |     |      |             |      |
|---------------------|-------------|-------|------|------|-----|------|-------------|------|
|                     |             | 10785 | 2514 | 739  | 137 | 5.45 |             |      |
|                     |             | 10780 | 2475 | 512  | 139 | 5.62 |             |      |
|                     |             | 10862 | 2454 | 739  | 157 | 6.40 |             |      |
|                     |             | 10724 | 2483 | 631  | 164 | 6.60 |             |      |
| <i>Glycine</i>      | williams82  | 10473 | 2891 | 669  | 165 | 5.71 | 5.24 (0.26) | 2882 |
| <i>max</i>          |             | 10603 | 2843 | 598  | 142 | 4.99 |             |      |
|                     |             | 10575 | 2839 | 563  | 148 | 5.21 |             |      |
|                     |             | 10522 | 2895 | 646  | 146 | 5.04 |             |      |
|                     |             | 10503 | 2895 | 544  | 150 | 5.18 |             |      |
|                     |             | 10544 | 2927 | 804  | 156 | 5.33 |             |      |
| <i>Gossypium</i>    |             | 9722  | 2927 | 779  | 237 | 8.10 | 7.77 (0.43) | 2924 |
| <i>raimondii</i>    |             | 9604  | 2947 | 567  | 220 | 7.47 |             |      |
|                     |             | 9548  | 2982 | 663  | 249 | 8.35 |             |      |
|                     |             | 9604  | 2888 | 516  | 210 | 7.27 |             |      |
|                     |             | 9636  | 2910 | 699  | 217 | 7.46 |             |      |
|                     |             | 9581  | 2892 | 727  | 230 | 7.95 |             |      |
| <i>Solanum</i>      | micro-tom   | 9326  | 3725 | 811  | 207 | 5.56 | 5.67 (0.38) | 3737 |
| <i>lycopersicum</i> |             | 9280  | 3778 | 689  | 239 | 6.33 |             |      |
|                     |             | 9349  | 3692 | 626  | 195 | 5.28 |             |      |
|                     |             | 9335  | 3778 | 661  | 222 | 5.88 |             |      |
|                     |             | 9227  | 3705 | 638  | 205 | 5.53 |             |      |
|                     |             | 9323  | 3742 | 938  | 203 | 5.42 |             |      |
| <i>Solanum</i>      | ta496       | 9868  | 3278 | 739  | 181 | 5.52 | 5.64 (0.19) | 3254 |
| <i>lycopersicum</i> |             | 9835  | 3216 | 827  | 190 | 5.91 |             |      |
|                     |             | 9899  | 3217 | 766  | 186 | 5.78 |             |      |
|                     |             | 9928  | 3274 | 613  | 177 | 5.41 |             |      |
|                     |             | 9899  | 3288 | 797  | 181 | 5.50 |             |      |
|                     |             | 9832  | 3248 | 771  | 186 | 5.73 |             |      |
| <i>Ipomoea</i>      | tokyo-kokei | 10958 | 3895 | 429  | 180 | 4.62 | 4.58 (0.29) | 3926 |
| <i>nil</i>          |             | 10894 | 3968 | 427  | 193 | 4.86 |             |      |
|                     |             | 10889 | 3863 | 480  | 188 | 4.87 |             |      |
|                     |             | 10976 | 3931 | 446  | 176 | 4.48 |             |      |
|                     |             | 10861 | 3973 | 422  | 181 | 4.56 |             |      |
|                     |             | 10994 | 3926 | 387  | 160 | 4.08 |             |      |
| <i>Lactuca</i>      | salinas     | 10703 | 3528 | 479  | 236 | 6.69 | 6.93 (0.3)  | 3540 |
| <i>sativa</i>       |             | 10803 | 3576 | 495  | 254 | 7.10 |             |      |
|                     |             | 10784 | 3556 | 511  | 244 | 6.86 |             |      |
|                     |             | 10696 | 3524 | 533  | 263 | 7.46 |             |      |
|                     |             | 10657 | 3500 | 553  | 235 | 6.71 |             |      |
|                     |             | 10747 | 3556 | 643  | 240 | 6.75 |             |      |
| <i>Vitis</i>        | cabernet    | 8402  | 2983 | 2095 | 253 | 8.48 | 7.77 (0.61) | 3026 |
| <i>vinifera</i>     | sauvignon   | 8330  | 3026 | 2005 | 232 | 7.67 |             |      |
|                     |             | 8402  | 2969 | 2150 | 210 | 7.07 |             |      |
|                     |             | 8520  | 3118 | 1924 | 240 | 7.70 |             |      |
|                     |             | 8471  | 3062 | 2433 | 220 | 7.18 |             |      |
|                     |             | 8360  | 2999 | 2288 | 255 | 8.50 |             |      |
| <i>Vitis</i>        | chardonnay  | 5712  | 2885 | 754  | 95  | 3.29 | 3.01 (0.24) | 2921 |
| <i>vinifera</i>     |             | 5705  | 2915 | 885  | 91  | 3.12 |             |      |
|                     |             | 5688  | 2906 | 712  | 92  | 3.17 |             |      |
|                     |             | 5736  | 2977 | 617  | 80  | 2.69 |             |      |
|                     |             | 5737  | 2923 | 664  | 89  | 3.04 |             |      |
|                     |             | 5736  | 2921 | 640  | 80  | 2.74 |             |      |

|                 |            |       |      |      |     |      |             |      |
|-----------------|------------|-------|------|------|-----|------|-------------|------|
| monocot         |            |       |      |      |     |      |             |      |
| <i>Oryza</i>    | pa64s      | 10644 | 2825 | 491  | 220 | 7.79 | 7.06 (0.45) | 2813 |
| <i>Sativa</i>   |            | 10584 | 2817 | 438  | 188 | 6.67 |             |      |
| (indica)        |            | 10446 | 2775 | 560  | 199 | 7.17 |             |      |
|                 |            | 10637 | 2825 | 555  | 200 | 7.08 |             |      |
|                 |            | 10573 | 2834 | 520  | 184 | 6.49 |             |      |
|                 |            | 10631 | 2804 | 585  | 200 | 7.13 |             |      |
| <i>Oryza</i>    | nackdong   | 6625  | 1705 | 2355 | 98  | 5.75 | 6.14 (0.47) | 1721 |
| <i>sativa</i>   |            | 6667  | 1698 | 2000 | 94  | 5.54 |             |      |
| (japonica)      |            | 6617  | 1729 | 2004 | 118 | 6.82 |             |      |
|                 |            | 6668  | 1736 | 2266 | 110 | 6.34 |             |      |
|                 |            | 6668  | 1763 | 1712 | 106 | 6.01 |             |      |
|                 |            | 6669  | 1694 | 1751 | 108 | 6.38 |             |      |
| <i>Oryza</i>    | nipponbare | 11350 | 3215 | 223  | 80  | 2.49 | 2.97 (0.41) | 3183 |
| <i>sativa</i>   |            | 11408 | 3190 | 324  | 112 | 3.51 |             |      |
| (japonica)      |            | 11369 | 3103 | 314  | 88  | 2.84 |             |      |
|                 |            | 11386 | 3230 | 358  | 96  | 2.97 |             |      |
|                 |            | 11285 | 3196 | 427  | 108 | 3.38 |             |      |
|                 |            | 11444 | 3164 | 213  | 83  | 2.62 |             |      |
| <i>Sorghum</i>  | btx623     | 10125 | 2930 | 863  | 203 | 6.93 | 7.16 (0.27) | 2936 |
| <i>bicolor</i>  |            | 10342 | 2930 | 751  | 199 | 6.79 |             |      |
|                 |            | 10268 | 2992 | 985  | 224 | 7.49 |             |      |
|                 |            | 10251 | 2938 | 1038 | 218 | 7.42 |             |      |
|                 |            | 10300 | 2947 | 1001 | 211 | 7.16 |             |      |
|                 |            | 10399 | 2881 | 856  | 206 | 7.15 |             |      |
| <i>Zea mays</i> | b73        | 11682 | 2144 | 397  | 131 | 6.11 | 5.62 (0.43) | 2102 |
|                 |            | 11872 | 2099 | 391  | 105 | 5.00 |             |      |
|                 |            | 11738 | 2100 | 475  | 123 | 5.86 |             |      |
|                 |            | 11855 | 2105 | 426  | 124 | 5.89 |             |      |
|                 |            | 11759 | 2118 | 357  | 110 | 5.19 |             |      |
|                 |            | 11783 | 2046 | 464  | 116 | 5.67 |             |      |
| <i>Zea mays</i> | f2         | 8803  | 3039 | 902  | 173 | 5.69 | 5.5 (0.21)  | 3067 |
|                 |            | 8774  | 3080 | 943  | 174 | 5.65 |             |      |
|                 |            | 8780  | 3037 | 893  | 164 | 5.40 |             |      |
|                 |            | 8801  | 3127 | 789  | 172 | 5.50 |             |      |
|                 |            | 8719  | 3063 | 884  | 173 | 5.65 |             |      |
|                 |            | 8825  | 3058 | 801  | 157 | 5.13 |             |      |
| <i>Zea mays</i> | oh43       | 8217  | 2819 | 722  | 127 | 4.51 | 4.51 (0.32) | 2836 |
|                 |            | 8094  | 2867 | 693  | 139 | 4.85 |             |      |
|                 |            | 8075  | 2831 | 706  | 130 | 4.59 |             |      |
|                 |            | 8176  | 2833 | 773  | 114 | 4.02 |             |      |
|                 |            | 8113  | 2827 | 772  | 136 | 4.81 |             |      |
|                 |            | 8070  | 2839 | 637  | 121 | 4.26 |             |      |
| <i>Hordeum</i>  | barke      | 8700  | 2641 | 575  | 73  | 2.76 | 3.09 (0.31) | 2633 |
| <i>vulgare</i>  |            | 8587  | 2676 | 490  | 92  | 3.44 |             |      |
|                 |            | 8548  | 2584 | 707  | 73  | 2.83 |             |      |
|                 |            | 8633  | 2621 | 682  | 91  | 3.47 |             |      |
|                 |            | 8621  | 2635 | 708  | 76  | 2.88 |             |      |
|                 |            | 8660  | 2641 | 616  | 84  | 3.18 |             |      |
| <i>Hordeum</i>  | haruna     | 7924  | 2894 | 926  | 74  | 2.56 | 2.57 (0.15) | 2905 |
| <i>vulgare</i>  |            | 8042  | 2863 | 1272 | 76  | 2.65 |             |      |
|                 |            | 7991  | 2909 | 764  | 79  | 2.72 |             |      |

|                |       |      |      |     |     |      |             |      |
|----------------|-------|------|------|-----|-----|------|-------------|------|
|                |       | 7959 | 2882 | 451 | 76  | 2.64 |             |      |
|                |       | 8095 | 2948 | 957 | 75  | 2.54 |             |      |
|                |       | 8116 | 2936 | 540 | 67  | 2.28 |             |      |
| <i>Hordeum</i> | morex | 9770 | 2356 | 836 | 92  | 3.90 | 3.97 (0.44) | 2372 |
| <i>vulgare</i> |       | 9782 | 2400 | 919 | 105 | 4.38 |             |      |
|                |       | 9752 | 2357 | 746 | 80  | 3.39 |             |      |
|                |       | 9773 | 2371 | 935 | 107 | 4.51 |             |      |
|                |       | 9743 | 2392 | 821 | 85  | 3.55 |             |      |
|                |       | 9633 | 2353 | 497 | 96  | 4.08 |             |      |
